# Supplementary material for: High resolution FTIR spectroscopy of the ν1band of NSCl
Source: Royal Society of Chemistry journal article supplement (doi:10.1039/b416215c), 2005-01-01
Supplement: b416215c-e1.pdf [file b416215c-e1.pdf]

nscl -predict delta A,B,C from OPCL-JMS 200, 287-89 (200Thu Jul 31  
 12:00:13 2003  
 LINES REQUESTED= 6303 NUMBER OF PARAMETERS= 27 NUMBER OF ITERATIONS= 4  
 MARQUARDT PARAMETER =0.0000E+000 max (OBS-CALC)/ERROR =1.0000E+006

|       |    | PARAMETERS - A.PRIORI ERROR |                       |               |    |
|-------|----|-----------------------------|-----------------------|---------------|----|
| 1     | 1  | 10000                       | 4.1723436482906E+004  | 1.000000E+018 | A  |
| 2     | 2  | 20000                       | 4.1142439367220E+003  | 1.000000E+018 | B  |
| 3     | 3  | 30000                       | 3.7385830806358E+003  | 1.000000E+018 | C  |
| 4     | 4  | 200                         | -2.6356643954939E-003 | 1.000000E+018 |    |
| -DJ   |    |                             |                       |               |    |
| 5     | 5  | 1100                        | 3.9788804290709E-002  | 1.000000E+018 |    |
| -DJK  |    |                             |                       |               |    |
| 6     | 6  | 2000                        | -1.6658465090993E+000 | 1.000000E+018 |    |
| -DK   |    |                             |                       |               |    |
| 7     | 7  | 40100                       | -3.6277791606525E-004 | 1.000000E+018 |    |
| -delj |    |                             |                       |               |    |
| 8     | 8  | 41000                       | -1.8389817672190E-002 | 1.000000E+018 |    |
| -delk |    |                             |                       |               |    |
| 9     | 9  | 1200                        | 5.1297600193302E-008  | 1.000000E+018 |    |
| HJK   |    |                             |                       |               |    |
| 10    | 10 | 2100                        | -9.9867412103946E-006 | 1.000000E+018 |    |
| HKJ   |    |                             |                       |               |    |
| 11    | 11 | 3000                        | 2.8491809965403E-004  | 1.000000E+018 | HK |
| 12    | 12 | 11                          | 3.9739681002584E+007  | 1.000000E+018 | E  |
| 13    | 13 | 10011                       | 4.1403755503559E+004  | 1.000000E+018 | A  |
| 14    | 14 | 20011                       | 4.1132418265646E+003  | 1.000000E+018 | B  |
| 15    | 15 | 30011                       | 3.7353270268467E+003  | 1.000000E+018 | C  |
| 16    | 16 | 211                         | -2.6458871840215E-003 | 1.000000E+018 |    |
| -DJ   |    |                             |                       |               |    |
| 17    | 17 | 1111                        | 4.0065110614159E-002  | 1.000000E+018 |    |
| -DJK  |    |                             |                       |               |    |
| 18    | 18 | 2011                        | -1.6490155514600E+000 | 1.000000E+018 |    |
| -DK   |    |                             |                       |               |    |
| 19    | 19 | 40111                       | -3.6711084951135E-004 | 1.000000E+018 |    |
| -delj |    |                             |                       |               |    |
| 20    | 20 | 41011                       | -1.8384287049732E-002 | 1.000000E+018 |    |
| -delk |    |                             |                       |               |    |
| 21    | 21 | 1211                        | 5.1309731522481E-008  | 1.000000E+018 |    |
| HJK   |    |                             |                       |               |    |
| 22    | 22 | 2111                        | -9.9492846952288E-006 | 1.000000E+018 |    |
| HKJ   |    |                             |                       |               |    |
| 23    | 23 | 3011                        | 2.8163992040003E-004  | 1.000000E+018 | HK |
| 24    | 24 | 300                         | 6.9779965502809E-010  | 1.000000E+018 | HJ |
| 25    | 24 | -311                        | 6.9779965502809E-010  | 1.000000      | HJ |
| 26    | 25 | 4000                        | -5.6115838867640E-008 | 1.000000E+018 |    |
| -LK   |    |                             |                       |               |    |
| 27    | 25 | -4011                       | -5.6115838867640E-008 | 1.000000      |    |
| -LK   |    |                             |                       |               |    |

27 parameters read, 25 independent parameters

ENERGY SORT OF WANG SUB-BLOCKS

PROLATE ROTOR

V KMIN KMAX ESYMWT SPINS

0 0 99 -1  
 1 0 99 -1  
 2 0 99 -1

BLOCK - WT - SYM - V - TSP - N - other quanta (rel. to F=0 )

1 1 x 0 0  
 2 1 c 0 0  
 3 1 b 0 0  
 4 1 a 0 0  
 5 1 x 1 0  
 6 1 c 1 0  
 7 1 b 1 0  
 8 1 a 1 0  
 9 1 x 2 0

10 1 c 2 0  
 11 1 b 2 0  
 12 1 a 2 0

Maximum Dimension for Hamiltonian = 50

| DIFF.     | EXP.ERR. | EST.ERR.   | AVG.      | CALC.FREQ. | EXP.FREQ. - CALC.FREQ. - | DIFF.        | WT.          |
|-----------|----------|------------|-----------|------------|--------------------------|--------------|--------------|
| 1:        | 1        | 1          | 0 0 1     | 0 1 0      |                          | 37983.10000  | 37983.22917  |
| -0.12917  |          | 0.10000    | 0.00000   |            |                          |              |              |
| 2:        | 2        | 1          | 1 0 2     | 0 2 0      |                          | 38361.72000  | 38361.76232  |
| -0.04232  |          | 0.10000    | 0.00000   |            |                          |              |              |
| 3:        | 3        | 1          | 2 0 3     | 0 3 0      |                          | 38934.40000  | 38934.78052  |
| -0.38052  |          | 0.10000    | 0.00000   |            |                          |              |              |
| 4:        | 4        | 1          | 3 0 4     | 0 4 0      |                          | 39708.73000  | 39708.52006  |
| 0.20994   |          | 0.10000    | 0.00000   |            |                          |              |              |
| 5:        | 5        | 1          | 4 0 5     | 0 5 0      |                          | 40690.41000  | 40691.24328  |
| -0.83328  |          | 9.10000    | 0.00000   |            |                          |              |              |
| 6:        | 6        | 1          | 5 0 6     | 0 6 0      |                          | 41893.52000  | 41893.17441  |
| 0.34559   |          | 0.10000    | 0.00000   |            |                          |              |              |
| 7:        | 7        | 1          | 6 0 7     | 0 7 0      |                          | 43327.00000  | 43326.39629  |
| 0.60371   |          | 0.10000    | 0.00000   |            |                          |              |              |
| 8:        | 8        | 1          | 7 0 8     | 0 8 0      |                          | 45005.00000  | 45004.69365  |
| 0.30635   |          | 0.10000    | 0.00000   |            |                          |              |              |
| 9:        | 1        | 1          | 1 0 0     | 0 0 0      |                          | 45460.22000  | 45460.46125  |
| -0.24125  |          | 0.10000    | 0.00000   |            |                          |              |              |
| 10:       | 2        | 1          | 2 0 1     | 0 1 0      |                          | 52937.90000  | 52937.79790  |
| 0.10210   |          | 0.10000    | 0.00000   |            |                          |              |              |
| 11:       | 3        | 1          | 3 0 2     | 0 2 0      |                          | 60228.40000  | 60228.37905  |
| 0.02095   |          | 0.10000    | 0.00000   |            |                          |              |              |
| 12:       | 1        | 1          | 1 0 2     | 0 2 0      |                          | 21904.86000  | 21904.87342  |
| -0.01342  |          | 0.10000    | 0.00000   |            |                          |              |              |
| 13:       | 2        | 1          | 2 0 3     | 0 3 0      |                          | 13687.89000  | 13688.02174  |
| -0.13174  |          | 0.10000    | 0.00000   |            |                          |              |              |
| 14:       | 6        | 0          | 6 0 5     | 1 5 0      |                          | 11958.30000  | 11958.50440  |
| -0.20440  |          | 0.10000    | 0.00000   |            |                          |              |              |
| 15:       | 7        | 0          | 7 0 6     | 1 6 0      |                          | 20801.36000  | 20801.85228  |
| -0.49228  |          | 0.10000    | 0.00000   |            |                          |              |              |
| 16:       | 8        | 0          | 8 0 7     | 1 7 0      |                          | 29768.26000  | 29768.67814  |
| -0.41814  |          | 0.10000    | 0.00000   |            |                          |              |              |
| 17:       | 9        | 2          | 8 0 10    | 1 9 0      |                          | 24744.92000  | 24745.22882  |
| -0.30882  |          | 0.10000    | 0.00000   |            |                          |              |              |
| 18:       | 10       | 2          | 9 0 11    | 1 10 0     |                          | 14923.31000  | 14922.12670  |
| 1.18330   |          | 9.10000    | 0.00000   |            |                          |              |              |
| 19:       | 14       | 1          | 13 0 13   | 2 12 0     |                          | 15490.03000  | 15489.76774  |
| 0.26226   |          | 0.10000    | 0.00000   |            |                          |              |              |
| 20:       | 15       | 1          | 14 0 14   | 2 13 0     |                          | 25920.70000  | 25920.84334  |
| -0.14334  |          | 0.10000    | 0.00000   |            |                          |              |              |
| 21:       | 12       | 2          | 10 0 13   | 1 13 0     |                          | 31601.97000  | 31602.06316  |
| -0.09316  |          | 0.10000    | 0.00000   |            |                          |              |              |
| 22:       | 13       | 2          | 11 0 14   | 1 14 0     |                          | 27486.13000  | 27486.15938  |
| -0.02938  |          | 0.10000    | 0.00000   |            |                          |              |              |
| 23:       | 14       | 2          | 12 0 15   | 1 15 0     |                          | 23807.70000  | 23807.68079  |
| 0.01921   |          | 0.10000    | 0.00000   |            |                          |              |              |
| 24:       | 15       | 2          | 13 0 16   | 1 16 0     |                          | 20594.13000  | 20594.32650  |
| -0.19650  |          | 0.10000    | 0.00000   |            |                          |              |              |
| 25:       | 16       | 2          | 14 0 17   | 1 17 0     |                          | 17872.57000  | 17872.24498  |
| 0.32502   |          | 0.10000    | 0.00000   |            |                          |              |              |
| 26:       | 17       | 2          | 15 0 18   | 1 18 0     |                          | 15665.32000  | 15665.34581  |
| -0.02581  |          | 0.10000    | 0.00000   |            |                          |              |              |
| 27:       | 18       | 2          | 16 0 19   | 1 19 0     |                          | 13994.59000  | 13994.69372  |
| -0.10372  |          | 0.10000    | 0.00000   |            |                          |              |              |
| 28:       | 19       | 2          | 17 0 20   | 1 20 0     |                          | 12877.96000  | 12878.02494  |
| -0.06494  |          | 0.10000    | 0.00000   |            |                          |              |              |
| 29:       | 5        | 5          | 1 1 4     | 4 0 0      |                          | 1337.9433200 | 1337.9433001 |
| 0.0000199 |          | -0.0003000 | 0.0000000 |            |                          |              |              |
| 30:       | 6        | 5          | 2 1 5     | 4 1 0      |                          | 1338.2051600 | 1338.2045748 |

|            |            |           |    |                           |
|------------|------------|-----------|----|---------------------------|
| 0.0005852  | -0.0003000 | 0.0000000 |    |                           |
| 31:        | 7          | 5         | 3  | 1 6 4 2 0                 |
|            |            |           |    | 1338.4661700 1338.4657087 |
| 0.0004613  | -0.0003000 | 0.0000000 |    |                           |
| 32:        | 10         | 5         | 6  | 1 9 4 5 0                 |
|            |            |           |    | 1339.2485300 1339.2481365 |
| 0.0003935  | -0.0003000 | 0.0000000 |    |                           |
| 33:        | 11         | 5         | 7  | 1 10 4 6 0                |
|            |            |           |    | 1339.5088000 1339.5085663 |
| 0.0002337  | -0.0003000 | 0.0000000 |    |                           |
| 34:        | 12         | 5         | 8  | 1 11 4 7 0                |
|            |            |           |    | 1339.7691200 1339.7687727 |
| 0.0003473  | -0.0003000 | 0.0000000 |    |                           |
| 35:        | 13         | 5         | 9  | 1 12 4 8 0                |
|            |            |           |    | 1340.0292400 1340.0287317 |
| 0.0005083  | -0.0003000 | 0.0000000 |    |                           |
| 36:        | 14         | 5         | 10 | 1 13 4 9 0                |
|            |            |           |    | 1340.2882000 1340.2884162 |
| -0.0002162 | -0.0003000 | 0.0000000 |    |                           |
| 37:        | 15         | 5         | 11 | 1 14 4 10 0               |
|            |            |           |    | 1340.5480200 1340.5477959 |
| 0.0002241  | -0.0003000 | 0.0000000 |    |                           |
| 38:        | 17         | 5         | 13 | 1 16 4 12 0               |
|            |            |           |    | 1341.0650800 1341.0655023 |
| -0.0004223 | -0.0003000 | 0.0000000 |    |                           |
| 39:        | 24         | 5         | 20 | 1 23 4 19 0               |
|            |            |           |    | 1342.8603600 1342.8613422 |
| -0.0009822 | -0.0003000 | 0.0000000 |    |                           |
| 40:        | 26         | 5         | 22 | 1 25 4 21 0               |
|            |            |           |    | 1343.3674800 1343.3675216 |
| -0.0000416 | -0.0003000 | 0.0000000 |    |                           |
| 41:        | 29         | 5         | 25 | 1 28 4 24 0               |
|            |            |           |    | 1344.1179300 1344.1177680 |
| 0.0001620  | -0.0003000 | 0.0000000 |    |                           |
| 42:        | 30         | 5         | 26 | 1 29 4 25 0               |
|            |            |           |    | 1344.3643400 1344.3647984 |
| -0.0004584 | -0.0003000 | 0.0000000 |    |                           |
| 43:        | 31         | 5         | 27 | 1 30 4 26 0               |
|            |            |           |    | 1344.6102800 1344.6099689 |
| 0.0003111  | -0.0003000 | 0.0000000 |    |                           |
| 44:        | 5          | 5         | 0  | 1 4 4 1 0                 |
|            |            |           |    | 1337.9433200 1337.9433001 |
| 0.0000199  | -0.0003000 | 0.0000000 |    |                           |
| 45:        | 6          | 5         | 1  | 1 5 4 2 0                 |
|            |            |           |    | 1338.2051600 1338.2045748 |
| 0.0005852  | -0.0003000 | 0.0000000 |    |                           |
| 46:        | 7          | 5         | 2  | 1 6 4 3 0                 |
|            |            |           |    | 1338.4661700 1338.4657088 |
| 0.0004612  | -0.0003000 | 0.0000000 |    |                           |
| 47:        | 10         | 5         | 5  | 1 9 4 6 0                 |
|            |            |           |    | 1339.2485300 1339.2481387 |
| 0.0003913  | -0.0003000 | 0.0000000 |    |                           |
| 48:        | 11         | 5         | 6  | 1 10 4 7 0                |
|            |            |           |    | 1339.5088000 1339.5085714 |
| 0.0002286  | -0.0003000 | 0.0000000 |    |                           |
| 49:        | 12         | 5         | 7  | 1 11 4 8 0                |
|            |            |           |    | 1339.7691200 1339.7687836 |
| 0.0003364  | -0.0003000 | 0.0000000 |    |                           |
| 50:        | 13         | 5         | 8  | 1 12 4 9 0                |
|            |            |           |    | 1340.0292400 1340.0287535 |
| 0.0004865  | -0.0003000 | 0.0000000 |    |                           |
| 51:        | 14         | 5         | 9  | 1 13 4 10 0               |
|            |            |           |    | 1340.2882000 1340.2884574 |
| -0.0002574 | -0.0003000 | 0.0000000 |    |                           |
| 52:        | 15         | 5         | 10 | 1 14 4 11 0               |
|            |            |           |    | 1340.5480200 1340.5478701 |
| 0.0001499  | -0.0003000 | 0.0000000 |    |                           |
| 53:        | 17         | 5         | 12 | 1 16 4 13 0               |
|            |            |           |    | 1341.0650800 1341.0657160 |
| -0.0006360 | -0.0003000 | 0.0000000 |    |                           |
| 54:        | 24         | 5         | 19 | 1 23 4 20 0               |
|            |            |           |    | 1342.8652400 1342.8651062 |
| 0.0001338  | -0.0003000 | 0.0000000 |    |                           |
| 55:        | 26         | 5         | 21 | 1 25 4 22 0               |
|            |            |           |    | 1343.3744800 1343.3747844 |
| -0.0003044 | -0.0003000 | 0.0000000 |    |                           |
| 56:        | 28         | 5         | 23 | 1 27 4 24 0               |
|            |            |           |    | 1343.8830200 1343.8823971 |
| 0.0006229  | -0.0003000 | 0.0000000 |    |                           |
| 57:        | 30         | 5         | 25 | 1 29 4 26 0               |
|            |            |           |    | 1344.3883500 1344.3881131 |
| 0.0002369  | -0.0003000 | 0.0000000 |    |                           |
| 58:        | 8          | 6         | 3  | 1 7 5 2 0                 |
|            |            |           |    | 1341.1162800 1341.1158853 |
| 0.0003947  | -0.0003000 | 0.0000000 |    |                           |
| 59:        | 10         | 6         | 5  | 1 9 5 4 0                 |
|            |            |           |    | 1341.6373500 1341.6376033 |
| -0.0002533 | -0.0003000 | 0.0000000 |    |                           |
| 60:        | 11         | 6         | 6  | 1 10 5 5 0                |
|            |            |           |    | 1341.8982900 1341.8982285 |
| 0.0000615  | -0.0003000 | 0.0000000 |    |                           |
| 61:        | 12         | 6         | 7  | 1 11 5 6 0                |
|            |            |           |    | 1342.1582200 1342.1586833 |
| -0.0004633 | -0.0003000 | 0.0000000 |    |                           |
| 62:        | 13         | 6         | 8  | 1 12 5 7 0                |
|            |            |           |    | 1342.4188900 1342.4189555 |
| -0.0000655 | -0.0003000 | 0.0000000 |    |                           |

|                                 |              |              |
|---------------------------------|--------------|--------------|
| 63: 14 6 9 1 13 5 8 0           | 1342.6788600 | 1342.6790315 |
| -0.0001715 -0.0003000 0.0000000 |              |              |
| 64: 15 6 10 1 14 5 9 0          | 1342.9388600 | 1342.9388967 |
| -0.0000367 -0.0003000 0.0000000 |              |              |
| 65: 16 6 11 1 15 5 10 0         | 1343.1982900 | 1343.1985353 |
| -0.0002453 -0.0003000 0.0000000 |              |              |
| 66: 17 6 12 1 16 5 11 0         | 1343.4579900 | 1343.4579300 |
| 0.0000600 -0.0003000 0.0000000  |              |              |
| 67: 18 6 13 1 17 5 12 0         | 1343.7170000 | 1343.7170626 |
| -0.0000626 -0.0003000 0.0000000 |              |              |
| 68: 19 6 14 1 18 5 13 0         | 1343.9761000 | 1343.9759135 |
| 0.0001865 -0.0003000 0.0000000  |              |              |
| 69: 20 6 15 1 19 5 14 0         | 1344.2346700 | 1344.2344617 |
| 0.0002083 -0.0003000 0.0000000  |              |              |
| 70: 21 6 16 1 20 5 15 0         | 1344.4929600 | 1344.4926849 |
| 0.0002751 -0.0003000 0.0000000  |              |              |
| 71: 22 6 17 1 21 5 16 0         | 1344.7503900 | 1344.7505594 |
| -0.0001694 -0.0003000 0.0000000 |              |              |
| 72: 23 6 18 1 22 5 17 0         | 1345.0078300 | 1345.0080598 |
| -0.0002298 -0.0003000 0.0000000 |              |              |
| 73: 24 6 19 1 23 5 18 0         | 1345.2653300 | 1345.2651593 |
| 0.0001707 -0.0003000 0.0000000  |              |              |
| 74: 25 6 20 1 24 5 19 0         | 1345.5218200 | 1345.5218289 |
| -0.0000089 -0.0003000 0.0000000 |              |              |
| 75: 26 6 21 1 25 5 20 0         | 1345.7781300 | 1345.7780379 |
| 0.0000921 -0.0003000 0.0000000  |              |              |
| 76: 27 6 22 1 26 5 21 0         | 1346.0341600 | 1346.0337533 |
| 0.0004067 -0.0003000 0.0000000  |              |              |
| 77: 28 6 23 1 27 5 22 0         | 1346.2891400 | 1346.2889397 |
| 0.0002003 -0.0003000 0.0000000  |              |              |
| 78: 34 6 29 1 33 5 28 0         | 1347.8066400 | 1347.8065503 |
| 0.0000897 -0.0003000 0.0000000  |              |              |
| 79: 35 6 30 1 34 5 29 0         | 1348.0567300 | 1348.0567448 |
| -0.0000148 -0.0003000 0.0000000 |              |              |
| 80: 38 6 33 1 37 5 32 0         | 1348.8007600 | 1348.8012518 |
| -0.0004918 -0.0003000 0.0000000 |              |              |
| 81: 39 6 34 1 38 5 33 0         | 1349.0463900 | 1349.0470898 |
| -0.0006998 -0.0003000 0.0000000 |              |              |
| 82: 40 6 35 1 39 5 34 0         | 1349.2917900 | 1349.2915814 |
| 0.0002086 -0.0003000 0.0000000  |              |              |
| 83: 8 6 2 1 7 5 3 0             | 1341.1162800 | 1341.1158853 |
| 0.0003947 -0.0003000 0.0000000  |              |              |
| 84: 10 6 4 1 9 5 5 0            | 1341.6373500 | 1341.6376034 |
| -0.0002534 -0.0003000 0.0000000 |              |              |
| 85: 11 6 5 1 10 5 6 0           | 1341.8982900 | 1341.8982285 |
| 0.0000615 -0.0003000 0.0000000  |              |              |
| 86: 12 6 6 1 11 5 7 0           | 1342.1582200 | 1342.1586834 |
| -0.0004634 -0.0003000 0.0000000 |              |              |
| 87: 13 6 7 1 12 5 8 0           | 1342.4188900 | 1342.4189556 |
| -0.0000656 -0.0003000 0.0000000 |              |              |
| 88: 14 6 8 1 13 5 9 0           | 1342.6788600 | 1342.6790318 |
| -0.0001718 -0.0003000 0.0000000 |              |              |
| 89: 15 6 9 1 14 5 10 0          | 1342.9388600 | 1342.9388973 |
| -0.0000373 -0.0003000 0.0000000 |              |              |
| 90: 16 6 10 1 15 5 11 0         | 1343.1982900 | 1343.1985363 |
| -0.0002463 -0.0003000 0.0000000 |              |              |
| 91: 17 6 11 1 16 5 12 0         | 1343.4579900 | 1343.4579321 |
| 0.0000579 -0.0003000 0.0000000  |              |              |
| 92: 18 6 12 1 17 5 13 0         | 1343.7170000 | 1343.7170664 |
| -0.0000664 -0.0003000 0.0000000 |              |              |
| 93: 19 6 13 1 18 5 14 0         | 1343.9761000 | 1343.9759202 |
| 0.0001798 -0.0003000 0.0000000  |              |              |
| 94: 20 6 14 1 19 5 15 0         | 1344.2346700 | 1344.2344732 |
| 0.0001968 -0.0003000 0.0000000  |              |              |
| 95: 21 6 15 1 20 5 16 0         | 1344.4929600 | 1344.4927042 |

|              |            |           |      |              |
|--------------|------------|-----------|------|--------------|
| 0.0002558    | -0.0003000 | 0.0000000 |      |              |
| 96: 22       | 6 16       | 1 21      | 5 17 | 0            |
| 1344.7503900 |            |           |      | 1344.7505907 |
| -0.0002007   | -0.0003000 | 0.0000000 |      |              |
| 97: 23       | 6 17       | 1 22      | 5 18 | 0            |
| 1345.0078300 |            |           |      | 1345.0081095 |
| -0.0002795   | -0.0003000 | 0.0000000 |      |              |
| 98: 24       | 6 18       | 1 23      | 5 19 | 0            |
| 1345.2653300 |            |           |      | 1345.2652364 |
| 0.0000936    | -0.0003000 | 0.0000000 |      |              |
| 99: 25       | 6 19       | 1 24      | 5 20 | 0            |
| 1345.5218200 |            |           |      | 1345.5219466 |
| -0.0001266   | -0.0003000 | 0.0000000 |      |              |
| 100: 26      | 6 20       | 1 25      | 5 21 | 0            |
| 1345.7781300 |            |           |      | 1345.7782144 |
| -0.0000844   | -0.0003000 | 0.0000000 |      |              |
| 101: 27      | 6 21       | 1 26      | 5 22 | 0            |
| 1346.0341600 |            |           |      | 1346.0340136 |
| 0.0001464    | -0.0003000 | 0.0000000 |      |              |
| 102: 28      | 6 22       | 1 27      | 5 23 | 0            |
| 1346.2891400 |            |           |      | 1346.2893179 |
| -0.0001779   | -0.0003000 | 0.0000000 |      |              |
| 103: 34      | 6 28       | 1 33      | 5 29 | 0            |
| 1347.8089000 |            |           |      | 1347.8092939 |
| -0.0003939   | -0.0003000 | 0.0000000 |      |              |
| 104: 35      | 6 29       | 1 34      | 5 30 | 0            |
| 1348.0603600 |            |           |      | 1348.0604253 |
| -0.0000653   | -0.0003000 | 0.0000000 |      |              |
| 105: 36      | 6 30       | 1 35      | 5 31 | 0            |
| 1348.3115000 |            |           |      | 1348.3108764 |
| 0.0006236    | -0.0003000 | 0.0000000 |      |              |
| 106: 37      | 6 31       | 1 36      | 5 32 | 0            |
| 1348.5610900 |            |           |      | 1348.5606348 |
| 0.0004552    | -0.0003000 | 0.0000000 |      |              |
| 107: 38      | 6 32       | 1 37      | 5 33 | 0            |
| 1348.8094900 |            |           |      | 1348.8096928 |
| -0.0002028   | -0.0003000 | 0.0000000 |      |              |
| 108: 39      | 6 33       | 1 38      | 5 34 | 0            |
| 1349.0586900 |            |           |      | 1349.0580483 |
| 0.0006417    | -0.0003000 | 0.0000000 |      |              |
| 109: 41      | 6 35       | 1 40      | 5 36 | 0            |
| 1349.5525100 |            |           |      | 1349.5526789 |
| -0.0001689   | -0.0003000 | 0.0000000 |      |              |
| 110: 42      | 6 36       | 1 41      | 5 37 | 0            |
| 1349.7991300 |            |           |      | 1349.7989890 |
| 0.0001410    | -0.0003000 | 0.0000000 |      |              |
| 111: 43      | 6 37       | 1 42      | 5 38 | 0            |
| 1350.0453600 |            |           |      | 1350.0446689 |
| 0.0006911    | -0.0003000 | 0.0000000 |      |              |
| 112: 47      | 6 41       | 1 46      | 5 42 | 0            |
| 1351.0227400 |            |           |      | 1351.0222037 |
| 0.0005363    | -0.0003000 | 0.0000000 |      |              |
| 113: 49      | 6 43       | 1 48      | 5 44 | 0            |
| 1351.5081100 |            |           |      | 1351.5090988 |
| -0.0009888   | -0.0003000 | 0.0000000 |      |              |
| 114: 11      | 7 4        | 1 10      | 6 5  | 0            |
| 1344.2600000 |            |           |      | 1344.2596620 |
| 0.0003380    | -0.0003000 | 0.0000000 |      |              |
| 115: 12      | 7 5        | 1 11      | 6 6  | 0            |
| 1344.5203800 |            |           |      | 1344.5202671 |
| 0.0001129    | -0.0003000 | 0.0000000 |      |              |
| 116: 16      | 7 9        | 1 15      | 6 10 | 0            |
| 1345.5605000 |            |           |      | 1345.5610592 |
| -0.0005592   | -0.0003000 | 0.0000000 |      |              |
| 117: 17      | 7 10       | 1 16      | 6 11 | 0            |
| 1345.8203900 |            |           |      | 1345.8208030 |
| -0.0004130   | -0.0003000 | 0.0000000 |      |              |
| 118: 18      | 7 11       | 1 17      | 6 12 | 0            |
| 1346.0802100 |            |           |      | 1346.0803440 |
| -0.0001340   | -0.0003000 | 0.0000000 |      |              |
| 119: 20      | 7 13       | 1 19      | 6 14 | 0            |
| 1346.5984900 |            |           |      | 1346.5987694 |
| -0.0002794   | -0.0003000 | 0.0000000 |      |              |
| 120: 21      | 7 14       | 1 20      | 6 15 | 0            |
| 1346.8574400 |            |           |      | 1346.8576282 |
| -0.0001882   | -0.0003000 | 0.0000000 |      |              |
| 121: 25      | 7 18       | 1 24      | 6 19 | 0            |
| 1347.8899200 |            |           |      | 1347.8903724 |
| -0.0004524   | -0.0003000 | 0.0000000 |      |              |
| 122: 26      | 7 19       | 1 25      | 6 20 | 0            |
| 1348.1475100 |            |           |      | 1348.1478077 |
| -0.0002977   | -0.0003000 | 0.0000000 |      |              |
| 123: 28      | 7 21       | 1 27      | 6 22 | 0            |
| 1348.6615700 |            |           |      | 1348.6616590 |
| -0.0000890   | -0.0003000 | 0.0000000 |      |              |
| 124: 30      | 7 23       | 1 29      | 6 24 | 0            |
| 1349.1740400 |            |           |      | 1349.1740277 |
| 0.0000123    | -0.0003000 | 0.0000000 |      |              |
| 125: 31      | 7 24       | 1 30      | 6 25 | 0            |
| 1349.4297000 |            |           |      | 1349.4296073 |
| 0.0000927    | -0.0003000 | 0.0000000 |      |              |
| 126: 32      | 7 25       | 1 31      | 6 26 | 0            |
| 1349.6846300 |            |           |      | 1349.6847565 |
| -0.0001265   | -0.0003000 | 0.0000000 |      |              |
| 127: 33      | 7 26       | 1 32      | 6 27 | 0            |
| 1349.9392400 |            |           |      | 1349.9394541 |
| -0.0002141   | -0.0003000 | 0.0000000 |      |              |

|            |            |           |   |    |   |    |   |              |              |
|------------|------------|-----------|---|----|---|----|---|--------------|--------------|
| 128: 36    | 7          | 29        | 1 | 35 | 6 | 30 | 0 | 1350.7003000 | 1350.7006155 |
| -0.0003155 | -0.0003000 | 0.0000000 |   |    |   |    |   |              |              |
| 129: 37    | 7          | 30        | 1 | 36 | 6 | 31 | 0 | 1350.9527000 | 1350.9532826 |
| -0.0005826 | -0.0003000 | 0.0000000 |   |    |   |    |   |              |              |
| 130: 38    | 7          | 31        | 1 | 37 | 6 | 32 | 0 | 1351.2052700 | 1351.2053838 |
| -0.0001138 | -0.0003000 | 0.0000000 |   |    |   |    |   |              |              |
| 131: 39    | 7          | 32        | 1 | 38 | 6 | 33 | 0 | 1351.4567400 | 1351.4568952 |
| -0.0001552 | -0.0003000 | 0.0000000 |   |    |   |    |   |              |              |
| 132: 40    | 7          | 33        | 1 | 39 | 6 | 34 | 0 | 1351.7078200 | 1351.7077926 |
| 0.0000274  | -0.0003000 | 0.0000000 |   |    |   |    |   |              |              |
| 133: 41    | 7          | 34        | 1 | 40 | 6 | 35 | 0 | 1351.9582000 | 1351.9580519 |
| 0.0001481  | -0.0003000 | 0.0000000 |   |    |   |    |   |              |              |
| 134: 42    | 7          | 35        | 1 | 41 | 6 | 36 | 0 | 1352.2074700 | 1352.2076490 |
| -0.0001790 | -0.0003000 | 0.0000000 |   |    |   |    |   |              |              |
| 135: 43    | 7          | 36        | 1 | 42 | 6 | 37 | 0 | 1352.4559600 | 1352.4565605 |
| -0.0006005 | -0.0003000 | 0.0000000 |   |    |   |    |   |              |              |
| 136: 47    | 7          | 40        | 1 | 46 | 6 | 41 | 0 | 1353.4448200 | 1353.4449044 |
| -0.0000844 | -0.0003000 | 0.0000000 |   |    |   |    |   |              |              |
| 137: 49    | 7          | 42        | 1 | 48 | 6 | 43 | 0 | 1353.9345300 | 1353.9344231 |
| 0.0001069  | -0.0003000 | 0.0000000 |   |    |   |    |   |              |              |
| 138: 50    | 7          | 43        | 1 | 49 | 6 | 44 | 0 | 1354.1781700 | 1354.1779662 |
| 0.0002038  | -0.0003000 | 0.0000000 |   |    |   |    |   |              |              |
| 139: 52    | 7          | 45        | 1 | 51 | 6 | 46 | 0 | 1354.6634600 | 1354.6625814 |
| 0.0008786  | -0.0003000 | 0.0000000 |   |    |   |    |   |              |              |
| 140: 11    | 7          | 5         | 1 | 10 | 6 | 4  | 0 | 1344.2600000 | 1344.2596620 |
| 0.0003380  | -0.0003000 | 0.0000000 |   |    |   |    |   |              |              |
| 141: 12    | 7          | 6         | 1 | 11 | 6 | 5  | 0 | 1344.5203800 | 1344.5202671 |
| 0.0001129  | -0.0003000 | 0.0000000 |   |    |   |    |   |              |              |
| 142: 16    | 7          | 10        | 1 | 15 | 6 | 9  | 0 | 1345.5605000 | 1345.5610592 |
| -0.0005592 | -0.0003000 | 0.0000000 |   |    |   |    |   |              |              |
| 143: 17    | 7          | 11        | 1 | 16 | 6 | 10 | 0 | 1345.8203900 | 1345.8208030 |
| -0.0004130 | -0.0003000 | 0.0000000 |   |    |   |    |   |              |              |
| 144: 18    | 7          | 12        | 1 | 17 | 6 | 11 | 0 | 1346.0802100 | 1346.0803440 |
| -0.0001340 | -0.0003000 | 0.0000000 |   |    |   |    |   |              |              |
| 145: 20    | 7          | 14        | 1 | 19 | 6 | 13 | 0 | 1346.5984900 | 1346.5987693 |
| -0.0002793 | -0.0003000 | 0.0000000 |   |    |   |    |   |              |              |
| 146: 21    | 7          | 15        | 1 | 20 | 6 | 14 | 0 | 1346.8574400 | 1346.8576280 |
| -0.0001880 | -0.0003000 | 0.0000000 |   |    |   |    |   |              |              |
| 147: 25    | 7          | 19        | 1 | 24 | 6 | 18 | 0 | 1347.8899200 | 1347.8903707 |
| -0.0004507 | -0.0003000 | 0.0000000 |   |    |   |    |   |              |              |
| 148: 26    | 7          | 20        | 1 | 25 | 6 | 19 | 0 | 1348.1475100 | 1348.1478050 |
| -0.0002950 | -0.0003000 | 0.0000000 |   |    |   |    |   |              |              |
| 149: 28    | 7          | 22        | 1 | 27 | 6 | 21 | 0 | 1348.6615700 | 1348.6616522 |
| -0.0000822 | -0.0003000 | 0.0000000 |   |    |   |    |   |              |              |
| 150: 30    | 7          | 24        | 1 | 29 | 6 | 23 | 0 | 1349.1740400 | 1349.1740118 |
| 0.0000282  | -0.0003000 | 0.0000000 |   |    |   |    |   |              |              |
| 151: 31    | 7          | 25        | 1 | 30 | 6 | 24 | 0 | 1349.4297000 | 1349.4295835 |
| 0.0001165  | -0.0003000 | 0.0000000 |   |    |   |    |   |              |              |
| 152: 32    | 7          | 26        | 1 | 31 | 6 | 25 | 0 | 1349.6846300 | 1349.6847214 |
| -0.0000914 | -0.0003000 | 0.0000000 |   |    |   |    |   |              |              |
| 153: 33    | 7          | 27        | 1 | 32 | 6 | 26 | 0 | 1349.9392400 | 1349.9394028 |
| -0.0001628 | -0.0003000 | 0.0000000 |   |    |   |    |   |              |              |
| 154: 36    | 7          | 30        | 1 | 35 | 6 | 29 | 0 | 1350.7003000 | 1350.7004668 |
| -0.0001668 | -0.0003000 | 0.0000000 |   |    |   |    |   |              |              |
| 155: 37    | 7          | 31        | 1 | 36 | 6 | 30 | 0 | 1350.9527000 | 1350.9530749 |
| -0.0003749 | -0.0003000 | 0.0000000 |   |    |   |    |   |              |              |
| 156: 38    | 7          | 32        | 1 | 37 | 6 | 31 | 0 | 1351.2052700 | 1351.2050965 |
| 0.0001735  | -0.0003000 | 0.0000000 |   |    |   |    |   |              |              |
| 157: 39    | 7          | 33        | 1 | 38 | 6 | 32 | 0 | 1351.4567400 | 1351.4565012 |
| 0.0002388  | -0.0003000 | 0.0000000 |   |    |   |    |   |              |              |
| 158: 40    | 7          | 34        | 1 | 39 | 6 | 33 | 0 | 1351.7078200 | 1351.7072569 |
| 0.0005631  | -0.0003000 | 0.0000000 |   |    |   |    |   |              |              |
| 159: 9     | 8          | 1         | 1 | 8  | 7 | 2  | 0 | 1346.0705800 | 1346.0700247 |
| 0.0005553  | -0.0003000 | 0.0000000 |   |    |   |    |   |              |              |
| 160: 10    | 8          | 2         | 1 | 9  | 7 | 3  | 0 | 1346.3313000 | 1346.3310100 |

|              |            |           |   |              |
|--------------|------------|-----------|---|--------------|
| 0.0002900    | -0.0003000 | 0.0000000 |   |              |
| 161: 11      | 8          | 3         | 1 | 10 7 4 0     |
| 1346.5917000 |            |           |   | 1346.5918676 |
| -0.0001676   | -0.0003000 | 0.0000000 |   |              |
| 162: 12      | 8          | 4         | 1 | 11 7 5 0     |
| 1346.8524300 |            |           |   | 1346.8525925 |
| -0.0001625   | -0.0003000 | 0.0000000 |   |              |
| 163: 13      | 8          | 5         | 1 | 12 7 6 0     |
| 1347.1133600 |            |           |   | 1347.1131793 |
| 0.0001807    | -0.0003000 | 0.0000000 |   |              |
| 164: 16      | 8          | 8         | 1 | 15 7 9 0     |
| 1347.8945300 |            |           |   | 1347.8940505 |
| 0.0004795    | -0.0003000 | 0.0000000 |   |              |
| 165: 17      | 8          | 9         | 1 | 16 7 10 0    |
| 1348.1541000 |            |           |   | 1348.1540220 |
| 0.0000780    | -0.0003000 | 0.0000000 |   |              |
| 166: 18      | 8          | 10        | 1 | 17 7 11 0    |
| 1348.4138900 |            |           |   | 1348.4138218 |
| 0.0000682    | -0.0003000 | 0.0000000 |   |              |
| 167: 19      | 8          | 11        | 1 | 18 7 12 0    |
| 1348.6732400 |            |           |   | 1348.6734418 |
| -0.0002018   | -0.0003000 | 0.0000000 |   |              |
| 168: 20      | 8          | 12        | 1 | 19 7 13 0    |
| 1348.9330100 |            |           |   | 1348.9328735 |
| 0.0001365    | -0.0003000 | 0.0000000 |   |              |
| 169: 21      | 8          | 13        | 1 | 20 7 14 0    |
| 1349.1920300 |            |           |   | 1349.1921082 |
| -0.0000782   | -0.0003000 | 0.0000000 |   |              |
| 170: 22      | 8          | 14        | 1 | 21 7 15 0    |
| 1349.4509100 |            |           |   | 1349.4511363 |
| -0.0002263   | -0.0003000 | 0.0000000 |   |              |
| 171: 24      | 8          | 16        | 1 | 23 7 17 0    |
| 1349.9687500 |            |           |   | 1349.9685336 |
| 0.0002164    | -0.0003000 | 0.0000000 |   |              |
| 172: 25      | 8          | 17        | 1 | 24 7 18 0    |
| 1350.2268000 |            |           |   | 1350.2268820 |
| -0.0000820   | -0.0003000 | 0.0000000 |   |              |
| 173: 26      | 8          | 18        | 1 | 25 7 19 0    |
| 1350.4846600 |            |           |   | 1350.4849822 |
| -0.0003222   | -0.0003000 | 0.0000000 |   |              |
| 174: 27      | 8          | 19        | 1 | 26 7 20 0    |
| 1350.7425600 |            |           |   | 1350.7428226 |
| -0.0002626   | -0.0003000 | 0.0000000 |   |              |
| 175: 28      | 8          | 20        | 1 | 27 7 21 0    |
| 1351.0002000 |            |           |   | 1351.0003915 |
| -0.0001915   | -0.0003000 | 0.0000000 |   |              |
| 176: 29      | 8          | 21        | 1 | 28 7 22 0    |
| 1351.2574300 |            |           |   | 1351.2576763 |
| -0.0002463   | -0.0003000 | 0.0000000 |   |              |
| 177: 30      | 8          | 22        | 1 | 29 7 23 0    |
| 1351.5143000 |            |           |   | 1351.5146643 |
| -0.0003643   | -0.0003000 | 0.0000000 |   |              |
| 178: 31      | 8          | 23        | 1 | 30 7 24 0    |
| 1351.7715400 |            |           |   | 1351.7713421 |
| 0.0001979    | -0.0003000 | 0.0000000 |   |              |
| 179: 32      | 8          | 24        | 1 | 31 7 25 0    |
| 1352.0275800 |            |           |   | 1352.0276962 |
| -0.0001162   | -0.0003000 | 0.0000000 |   |              |
| 180: 33      | 8          | 25        | 1 | 32 7 26 0    |
| 1352.2832000 |            |           |   | 1352.2837122 |
| -0.0005122   | -0.0003000 | 0.0000000 |   |              |
| 181: 34      | 8          | 26        | 1 | 33 7 27 0    |
| 1352.5396200 |            |           |   | 1352.5393756 |
| 0.0002444    | -0.0003000 | 0.0000000 |   |              |
| 182: 35      | 8          | 27        | 1 | 34 7 28 0    |
| 1352.7948100 |            |           |   | 1352.7946713 |
| 0.0001387    | -0.0003000 | 0.0000000 |   |              |
| 183: 38      | 8          | 30        | 1 | 37 7 31 0    |
| 1353.5583400 |            |           |   | 1353.5581951 |
| 0.0001449    | -0.0003000 | 0.0000000 |   |              |
| 184: 39      | 8          | 31        | 1 | 38 7 32 0    |
| 1353.8116100 |            |           |   | 1353.8118604 |
| -0.0002504   | -0.0003000 | 0.0000000 |   |              |
| 185: 40      | 8          | 32        | 1 | 39 7 33 0    |
| 1354.0647900 |            |           |   | 1354.0650760 |
| -0.0002860   | -0.0003000 | 0.0000000 |   |              |
| 186: 41      | 8          | 33        | 1 | 40 7 34 0    |
| 1354.3179500 |            |           |   | 1354.3178239 |
| 0.0001261    | -0.0003000 | 0.0000000 |   |              |
| 187: 42      | 8          | 34        | 1 | 41 7 35 0    |
| 1354.5701100 |            |           |   | 1354.5700859 |
| 0.0000241    | -0.0003000 | 0.0000000 |   |              |
| 188: 43      | 8          | 35        | 1 | 42 7 36 0    |
| 1354.8217600 |            |           |   | 1354.8218433 |
| -0.0000833   | -0.0003000 | 0.0000000 |   |              |
| 189: 46      | 8          | 38        | 1 | 45 7 39 0    |
| 1355.5733400 |            |           |   | 1355.5738946 |
| -0.0005546   | -0.0003000 | 0.0000000 |   |              |
| 190: 47      | 8          | 39        | 1 | 46 7 40 0    |
| 1355.8235000 |            |           |   | 1355.8234381 |
| 0.0000619    | -0.0003000 | 0.0000000 |   |              |
| 191: 48      | 8          | 40        | 1 | 47 7 41 0    |
| 1356.0725400 |            |           |   | 1356.0723773 |
| 0.0001627    | -0.0003000 | 0.0000000 |   |              |
| 192: 51      | 8          | 43        | 1 | 50 7 44 0    |
| 1356.8146800 |            |           |   | 1356.8153568 |
| -0.0006768   | -0.0003000 | 0.0000000 |   |              |

|                                 |              |              |
|---------------------------------|--------------|--------------|
| 193: 9 8 2 1 8 7 1 0            | 1346.0705800 | 1346.0700247 |
| 0.0005553 -0.0003000 0.0000000  |              |              |
| 194: 10 8 3 1 9 7 2 0           | 1346.3313000 | 1346.3310100 |
| 0.0002900 -0.0003000 0.0000000  |              |              |
| 195: 11 8 4 1 10 7 3 0          | 1346.5917000 | 1346.5918676 |
| -0.0001676 -0.0003000 0.0000000 |              |              |
| 196: 12 8 5 1 11 7 4 0          | 1346.8524300 | 1346.8525925 |
| -0.0001625 -0.0003000 0.0000000 |              |              |
| 197: 13 8 6 1 12 7 5 0          | 1347.1133600 | 1347.1131793 |
| 0.0001807 -0.0003000 0.0000000  |              |              |
| 198: 16 8 9 1 15 7 8 0          | 1347.8945300 | 1347.8940505 |
| 0.0004795 -0.0003000 0.0000000  |              |              |
| 199: 17 8 10 1 16 7 9 0         | 1348.1541000 | 1348.1540220 |
| 0.0000780 -0.0003000 0.0000000  |              |              |
| 200: 18 8 11 1 17 7 10 0        | 1348.4138900 | 1348.4138218 |
| 0.0000682 -0.0003000 0.0000000  |              |              |
| 201: 19 8 12 1 18 7 11 0        | 1348.6732400 | 1348.6734418 |
| -0.0002018 -0.0003000 0.0000000 |              |              |
| 202: 20 8 13 1 19 7 12 0        | 1348.9330100 | 1348.9328735 |
| 0.0001365 -0.0003000 0.0000000  |              |              |
| 203: 21 8 14 1 20 7 13 0        | 1349.1920300 | 1349.1921082 |
| -0.0000782 -0.0003000 0.0000000 |              |              |
| 204: 22 8 15 1 21 7 14 0        | 1349.4509100 | 1349.4511363 |
| -0.0002263 -0.0003000 0.0000000 |              |              |
| 205: 24 8 17 1 23 7 16 0        | 1349.9687500 | 1349.9685336 |
| 0.0002164 -0.0003000 0.0000000  |              |              |
| 206: 25 8 18 1 24 7 17 0        | 1350.2268000 | 1350.2268820 |
| -0.0000820 -0.0003000 0.0000000 |              |              |
| 207: 26 8 19 1 25 7 18 0        | 1350.4846600 | 1350.4849821 |
| -0.0003221 -0.0003000 0.0000000 |              |              |
| 208: 27 8 20 1 26 7 19 0        | 1350.7425600 | 1350.7428226 |
| -0.0002626 -0.0003000 0.0000000 |              |              |
| 209: 28 8 21 1 27 7 20 0        | 1351.0002000 | 1351.0003914 |
| -0.0001914 -0.0003000 0.0000000 |              |              |
| 210: 29 8 22 1 28 7 21 0        | 1351.2574300 | 1351.2576762 |
| -0.0002462 -0.0003000 0.0000000 |              |              |
| 211: 30 8 23 1 29 7 22 0        | 1351.5143000 | 1351.5146641 |
| -0.0003641 -0.0003000 0.0000000 |              |              |
| 212: 31 8 24 1 30 7 23 0        | 1351.7715400 | 1351.7713418 |
| 0.0001982 -0.0003000 0.0000000  |              |              |
| 213: 32 8 25 1 31 7 24 0        | 1352.0275800 | 1352.0276956 |
| -0.0001156 -0.0003000 0.0000000 |              |              |
| 214: 33 8 26 1 32 7 25 0        | 1352.2832000 | 1352.2837113 |
| -0.0005113 -0.0003000 0.0000000 |              |              |
| 215: 34 8 27 1 33 7 26 0        | 1352.5396200 | 1352.5393742 |
| 0.0002458 -0.0003000 0.0000000  |              |              |
| 216: 35 8 28 1 34 7 27 0        | 1352.7948100 | 1352.7946693 |
| 0.0001407 -0.0003000 0.0000000  |              |              |
| 217: 38 8 31 1 37 7 30 0        | 1353.5583400 | 1353.5581884 |
| 0.0001516 -0.0003000 0.0000000  |              |              |
| 218: 39 8 32 1 38 7 31 0        | 1353.8116100 | 1353.8118507 |
| -0.0002407 -0.0003000 0.0000000 |              |              |
| 219: 40 8 33 1 39 7 32 0        | 1354.0647900 | 1354.0650620 |
| -0.0002720 -0.0003000 0.0000000 |              |              |
| 220: 41 8 34 1 40 7 33 0        | 1354.3179500 | 1354.3178041 |
| 0.0001459 -0.0003000 0.0000000  |              |              |
| 221: 42 8 35 1 41 7 34 0        | 1354.5701100 | 1354.5700581 |
| 0.0000519 -0.0003000 0.0000000  |              |              |
| 222: 43 8 36 1 42 7 35 0        | 1354.8217600 | 1354.8218045 |
| -0.0000445 -0.0003000 0.0000000 |              |              |
| 223: 46 8 39 1 45 7 38 0        | 1355.5733400 | 1355.5737941 |
| -0.0004541 -0.0003000 0.0000000 |              |              |
| 224: 47 8 40 1 46 7 39 0        | 1355.8235000 | 1355.8233020 |
| 0.0001980 -0.0003000 0.0000000  |              |              |
| 225: 48 8 41 1 47 7 40 0        | 1356.0725400 | 1356.0721943 |

|            |            |           |              |              |
|------------|------------|-----------|--------------|--------------|
| 0.0003457  | -0.0003000 | 0.0000000 |              |              |
| 226: 51    | 8 44       | 1 50      | 7 43         | 0            |
| -0.0002489 | -0.0003000 | 0.0000000 | 1356.8146800 | 1356.8149289 |
| 227: 52    | 8 45       | 1 51      | 7 44         | 0            |
| -0.0000943 | -0.0003000 | 0.0000000 | 1357.0610100 | 1357.0611043 |
| 228: 9     | 9 0        | 1 8       | 8 1          | 0            |
| -0.0003997 | -0.0003000 | 0.0000000 | 1348.3713700 | 1348.3717697 |
| 229: 10    | 9 1        | 1 9       | 8 2          | 0            |
| -0.0000371 | -0.0003000 | 0.0000000 | 1348.6328100 | 1348.6328471 |
| 230: 11    | 9 2        | 1 10      | 8 3          | 0            |
| 0.0000649  | -0.0003000 | 0.0000000 | 1348.8938700 | 1348.8938051 |
| 231: 12    | 9 3        | 1 11      | 8 4          | 0            |
| 0.0000403  | -0.0003000 | 0.0000000 | 1349.1546800 | 1349.1546397 |
| 232: 13    | 9 4        | 1 12      | 8 5          | 0            |
| -0.0000469 | -0.0003000 | 0.0000000 | 1349.4153000 | 1349.4153469 |
| 233: 14    | 9 5        | 1 13      | 8 6          | 0            |
| -0.0004821 | -0.0003000 | 0.0000000 | 1349.6754400 | 1349.6759221 |
| 234: 18    | 9 9        | 1 17      | 8 10         | 0            |
| 0.0001164  | -0.0003000 | 0.0000000 | 1350.7169200 | 1350.7168036 |
| 235: 19    | 9 10       | 1 18      | 8 11         | 0            |
| 0.0001785  | -0.0003000 | 0.0000000 | 1350.9768200 | 1350.9766415 |
| 236: 20    | 9 11       | 1 19      | 8 12         | 0            |
| -0.0005244 | -0.0003000 | 0.0000000 | 1351.2357900 | 1351.2363144 |
| 237: 21    | 9 12       | 1 20      | 8 13         | 0            |
| -0.0000258 | -0.0003000 | 0.0000000 | 1351.4957900 | 1351.4958158 |
| 238: 22    | 9 13       | 1 21      | 8 14         | 0            |
| -0.0002187 | -0.0003000 | 0.0000000 | 1351.7549200 | 1351.7551387 |
| 239: 23    | 9 14       | 1 22      | 8 15         | 0            |
| -0.0001362 | -0.0003000 | 0.0000000 | 1352.0141400 | 1352.0142762 |
| 240: 24    | 9 15       | 1 23      | 8 16         | 0            |
| 0.0000093  | -0.0003000 | 0.0000000 | 1352.2732300 | 1352.2732207 |
| 241: 25    | 9 16       | 1 24      | 8 17         | 0            |
| -0.0002446 | -0.0003000 | 0.0000000 | 1352.5317200 | 1352.5319646 |
| 242: 26    | 9 17       | 1 25      | 8 18         | 0            |
| 0.0000302  | -0.0003000 | 0.0000000 | 1352.7905300 | 1352.7904998 |
| 243: 29    | 9 20       | 1 28      | 8 21         | 0            |
| 0.0002206  | -0.0003000 | 0.0000000 | 1353.5649900 | 1353.5647694 |
| 244: 30    | 9 21       | 1 29      | 8 22         | 0            |
| 0.0002958  | -0.0003000 | 0.0000000 | 1353.8226800 | 1353.8223842 |
| 245: 31    | 9 22       | 1 30      | 8 23         | 0            |
| 0.0001639  | -0.0003000 | 0.0000000 | 1354.0799100 | 1354.0797461 |
| 246: 32    | 9 23       | 1 31      | 8 24         | 0            |
| -0.0000753 | -0.0003000 | 0.0000000 | 1354.3367700 | 1354.3368453 |
| 247: 35    | 9 26       | 1 34      | 8 27         | 0            |
| 0.0001956  | -0.0003000 | 0.0000000 | 1355.1066600 | 1355.1064644 |
| 248: 36    | 9 27       | 1 35      | 8 28         | 0            |
| 0.0005507  | -0.0003000 | 0.0000000 | 1355.3629600 | 1355.3624093 |
| 249: 37    | 9 28       | 1 36      | 8 29         | 0            |
| -0.0002383 | -0.0003000 | 0.0000000 | 1355.6178000 | 1355.6180383 |
| 250: 38    | 9 29       | 1 37      | 8 30         | 0            |
| 0.0004700  | -0.0003000 | 0.0000000 | 1355.8738100 | 1355.8733400 |
| 251: 40    | 9 31       | 1 39      | 8 32         | 0            |
| 0.0001264  | -0.0003000 | 0.0000000 | 1356.3830400 | 1356.3829136 |
| 252: 41    | 9 32       | 1 40      | 8 33         | 0            |
| 0.0001889  | -0.0003000 | 0.0000000 | 1356.6373500 | 1356.6371611 |
| 253: 42    | 9 33       | 1 41      | 8 34         | 0            |
| -0.0002121 | -0.0003000 | 0.0000000 | 1356.8908200 | 1356.8910321 |
| 254: 43    | 9 34       | 1 42      | 8 35         | 0            |
| 0.0002563  | -0.0003000 | 0.0000000 | 1357.1447700 | 1357.1445137 |
| 255: 44    | 9 35       | 1 43      | 8 36         | 0            |
| -0.0001225 | -0.0003000 | 0.0000000 | 1357.3974700 | 1357.3975925 |
| 256: 45    | 9 36       | 1 44      | 8 37         | 0            |
| -0.0002348 | -0.0003000 | 0.0000000 | 1357.6500200 | 1357.6502548 |
| 257: 47    | 9 38       | 1 46      | 8 39         | 0            |
| -0.0001037 | -0.0003000 | 0.0000000 | 1358.1541700 | 1358.1542737 |

|            |                      |              |              |
|------------|----------------------|--------------|--------------|
| 258: 49    | 9 40 1 48 8 41 0     | 1358.6563200 | 1358.6564550 |
| -0.0001350 | -0.0003000 0.0000000 |              |              |
| 259: 51    | 9 42 1 50 8 43 0     | 1359.1566700 | 1359.1566776 |
| -0.0000076 | -0.0003000 0.0000000 |              |              |
| 260: 52    | 9 43 1 51 8 44 0     | 1359.4059200 | 1359.4060152 |
| -0.0000952 | -0.0003000 0.0000000 |              |              |
| 261: 9     | 9 1 1 8 8 0 0        | 1348.3713700 | 1348.3717697 |
| -0.0003997 | -0.0003000 0.0000000 |              |              |
| 262: 10    | 9 2 1 9 8 1 0        | 1348.6328100 | 1348.6328471 |
| -0.0000371 | -0.0003000 0.0000000 |              |              |
| 263: 11    | 9 3 1 10 8 2 0       | 1348.8938700 | 1348.8938051 |
| 0.0000649  | -0.0003000 0.0000000 |              |              |
| 264: 12    | 9 4 1 11 8 3 0       | 1349.1546800 | 1349.1546397 |
| 0.0000403  | -0.0003000 0.0000000 |              |              |
| 265: 13    | 9 5 1 12 8 4 0       | 1349.4153000 | 1349.4153469 |
| -0.0000469 | -0.0003000 0.0000000 |              |              |
| 266: 14    | 9 6 1 13 8 5 0       | 1349.6754400 | 1349.6759221 |
| -0.0004821 | -0.0003000 0.0000000 |              |              |
| 267: 18    | 9 10 1 17 8 9 0      | 1350.7169200 | 1350.7168036 |
| 0.0001164  | -0.0003000 0.0000000 |              |              |
| 268: 19    | 9 11 1 18 8 10 0     | 1350.9768200 | 1350.9766415 |
| 0.0001785  | -0.0003000 0.0000000 |              |              |
| 269: 20    | 9 12 1 19 8 11 0     | 1351.2357900 | 1351.2363144 |
| -0.0005244 | -0.0003000 0.0000000 |              |              |
| 270: 21    | 9 13 1 20 8 12 0     | 1351.4957900 | 1351.4958158 |
| -0.0000258 | -0.0003000 0.0000000 |              |              |
| 271: 22    | 9 14 1 21 8 13 0     | 1351.7549200 | 1351.7551387 |
| -0.0002187 | -0.0003000 0.0000000 |              |              |
| 272: 23    | 9 15 1 22 8 14 0     | 1352.0141400 | 1352.0142762 |
| -0.0001362 | -0.0003000 0.0000000 |              |              |
| 273: 24    | 9 16 1 23 8 15 0     | 1352.2732300 | 1352.2732207 |
| 0.0000093  | -0.0003000 0.0000000 |              |              |
| 274: 25    | 9 17 1 24 8 16 0     | 1352.5317200 | 1352.5319646 |
| -0.0002446 | -0.0003000 0.0000000 |              |              |
| 275: 26    | 9 18 1 25 8 17 0     | 1352.7905300 | 1352.7904998 |
| 0.0000302  | -0.0003000 0.0000000 |              |              |
| 276: 29    | 9 21 1 28 8 20 0     | 1353.5649900 | 1353.5647694 |
| 0.0002206  | -0.0003000 0.0000000 |              |              |
| 277: 30    | 9 22 1 29 8 21 0     | 1353.8226800 | 1353.8223842 |
| 0.0002958  | -0.0003000 0.0000000 |              |              |
| 278: 31    | 9 23 1 30 8 22 0     | 1354.0799100 | 1354.0797461 |
| 0.0001639  | -0.0003000 0.0000000 |              |              |
| 279: 32    | 9 24 1 31 8 23 0     | 1354.3367700 | 1354.3368453 |
| -0.0000753 | -0.0003000 0.0000000 |              |              |
| 280: 35    | 9 27 1 34 8 26 0     | 1355.1066600 | 1355.1064644 |
| 0.0001956  | -0.0003000 0.0000000 |              |              |
| 281: 36    | 9 28 1 35 8 27 0     | 1355.3629600 | 1355.3624093 |
| 0.0005507  | -0.0003000 0.0000000 |              |              |
| 282: 37    | 9 29 1 36 8 28 0     | 1355.6178000 | 1355.6180383 |
| -0.0002383 | -0.0003000 0.0000000 |              |              |
| 283: 38    | 9 30 1 37 8 29 0     | 1355.8738100 | 1355.8733399 |
| 0.0004701  | -0.0003000 0.0000000 |              |              |
| 284: 40    | 9 32 1 39 8 31 0     | 1356.3830400 | 1356.3829134 |
| 0.0001266  | -0.0003000 0.0000000 |              |              |
| 285: 41    | 9 33 1 40 8 32 0     | 1356.6373500 | 1356.6371607 |
| 0.0001893  | -0.0003000 0.0000000 |              |              |
| 286: 42    | 9 34 1 41 8 33 0     | 1356.8908200 | 1356.8910315 |
| -0.0002115 | -0.0003000 0.0000000 |              |              |
| 287: 43    | 9 35 1 42 8 34 0     | 1357.1447700 | 1357.1445128 |
| 0.0002572  | -0.0003000 0.0000000 |              |              |
| 288: 44    | 9 36 1 43 8 35 0     | 1357.3974700 | 1357.3975912 |
| -0.0001212 | -0.0003000 0.0000000 |              |              |
| 289: 45    | 9 37 1 44 8 36 0     | 1357.6500200 | 1357.6502530 |
| -0.0002330 | -0.0003000 0.0000000 |              |              |
| 290: 47    | 9 39 1 46 8 38 0     | 1358.1541700 | 1358.1542701 |

|            |            |           |      |                             |
|------------|------------|-----------|------|-----------------------------|
| -0.0001001 | -0.0003000 | 0.0000000 |      |                             |
| 291: 49    | 9 41       | 1 48      | 8 40 | 0 1358.6563200 1358.6564479 |
| -0.0001279 | -0.0003000 | 0.0000000 |      |                             |
| 292: 51    | 9 43       | 1 50      | 8 42 | 0 1359.1566700 1359.1566642 |
| 0.0000058  | -0.0003000 | 0.0000000 |      |                             |
| 293: 52    | 9 44       | 1 51      | 8 43 | 0 1359.4059200 1359.4059969 |
| -0.0000769 | -0.0003000 | 0.0000000 |      |                             |
| 294: 10    | 10 1       | 1 9       | 9 0  | 0 1350.9035800 1350.9034076 |
| 0.0001724  | -0.0003000 | 0.0000000 |      |                             |
| 295: 11    | 10 2       | 1 10      | 9 1  | 0 1351.1648600 1351.1644655 |
| 0.0003945  | -0.0003000 | 0.0000000 |      |                             |
| 296: 12    | 10 3       | 1 11      | 9 2  | 0 1351.4254700 1351.4254074 |
| 0.0000626  | -0.0003000 | 0.0000000 |      |                             |
| 297: 13    | 10 4       | 1 12      | 9 3  | 0 1351.6865700 1351.6862298 |
| 0.0003402  | -0.0003000 | 0.0000000 |      |                             |
| 298: 14    | 10 5       | 1 13      | 9 4  | 0 1351.9472500 1351.9469289 |
| 0.0003211  | -0.0003000 | 0.0000000 |      |                             |
| 299: 16    | 10 7       | 1 15      | 9 6  | 0 1352.4677800 1352.4679420 |
| -0.0001620 | -0.0003000 | 0.0000000 |      |                             |
| 300: 17    | 10 8       | 1 16      | 9 7  | 0 1352.7283900 1352.7282475 |
| 0.0001425  | -0.0003000 | 0.0000000 |      |                             |
| 301: 18    | 10 9       | 1 17      | 9 8  | 0 1352.9883500 1352.9884131 |
| -0.0000631 | -0.0003000 | 0.0000000 |      |                             |
| 302: 19    | 10 10      | 1 18      | 9 9  | 0 1353.2481500 1353.2484340 |
| -0.0002840 | -0.0003000 | 0.0000000 |      |                             |
| 303: 20    | 10 11      | 1 19      | 9 10 | 0 1353.5082200 1353.5083053 |
| -0.0000853 | -0.0003000 | 0.0000000 |      |                             |
| 304: 21    | 10 12      | 1 20      | 9 11 | 0 1353.7681100 1353.7680219 |
| 0.0000881  | -0.0003000 | 0.0000000 |      |                             |
| 305: 22    | 10 13      | 1 21      | 9 12 | 0 1354.0274900 1354.0275784 |
| -0.0000884 | -0.0003000 | 0.0000000 |      |                             |
| 306: 23    | 10 14      | 1 22      | 9 13 | 0 1354.2868200 1354.2869693 |
| -0.0001493 | -0.0003000 | 0.0000000 |      |                             |
| 307: 24    | 10 15      | 1 23      | 9 14 | 0 1354.5461300 1354.5461888 |
| -0.0000588 | -0.0003000 | 0.0000000 |      |                             |
| 308: 27    | 10 18      | 1 26      | 9 17 | 0 1355.3231200 1355.3227584 |
| 0.0003616  | -0.0003000 | 0.0000000 |      |                             |
| 309: 28    | 10 19      | 1 27      | 9 18 | 0 1355.5813700 1355.5812308 |
| 0.0001392  | -0.0003000 | 0.0000000 |      |                             |
| 310: 29    | 10 20      | 1 28      | 9 19 | 0 1355.8393000 1355.8394999 |
| -0.0001999 | -0.0003000 | 0.0000000 |      |                             |
| 311: 30    | 10 21      | 1 29      | 9 20 | 0 1356.0974600 1356.0975587 |
| -0.0000987 | -0.0003000 | 0.0000000 |      |                             |
| 312: 31    | 10 22      | 1 30      | 9 21 | 0 1356.3553500 1356.3554002 |
| -0.0000502 | -0.0003000 | 0.0000000 |      |                             |
| 313: 32    | 10 23      | 1 31      | 9 22 | 0 1356.6130900 1356.6130169 |
| 0.0000731  | -0.0003000 | 0.0000000 |      |                             |
| 314: 33    | 10 24      | 1 32      | 9 23 | 0 1356.8707600 1356.8704011 |
| 0.0003589  | -0.0003000 | 0.0000000 |      |                             |
| 315: 34    | 10 25      | 1 33      | 9 24 | 0 1357.1281200 1357.1275452 |
| 0.0005748  | -0.0003000 | 0.0000000 |      |                             |
| 316: 35    | 10 26      | 1 34      | 9 25 | 0 1357.3849600 1357.3844410 |
| 0.0005190  | -0.0003000 | 0.0000000 |      |                             |
| 317: 36    | 10 27      | 1 35      | 9 26 | 0 1357.6407900 1357.6410805 |
| -0.0002905 | -0.0003000 | 0.0000000 |      |                             |
| 318: 37    | 10 28      | 1 36      | 9 27 | 0 1357.8974000 1357.8974551 |
| -0.0000551 | -0.0003000 | 0.0000000 |      |                             |
| 319: 39    | 10 30      | 1 38      | 9 29 | 0 1358.4096300 1358.4093754 |
| 0.0002546  | -0.0003000 | 0.0000000 |      |                             |
| 320: 40    | 10 31      | 1 39      | 9 30 | 0 1358.6649100 1358.6649031 |
| 0.0000069  | -0.0003000 | 0.0000000 |      |                             |
| 321: 41    | 10 32      | 1 40      | 9 31 | 0 1358.9202200 1358.9201304 |
| 0.0000896  | -0.0003000 | 0.0000000 |      |                             |
| 322: 42    | 10 33      | 1 41      | 9 32 | 0 1359.1753000 1359.1750478 |
| 0.0002522  | -0.0003000 | 0.0000000 |      |                             |

|                                 |              |              |
|---------------------------------|--------------|--------------|
| 323: 43 10 34 1 42 9 33 0       | 1359.4297800 | 1359.4296457 |
| 0.0001343 -0.0003000 0.0000000  |              |              |
| 324: 44 10 35 1 43 9 34 0       | 1359.6839100 | 1359.6839142 |
| -0.0000042 -0.0003000 0.0000000 |              |              |
| 325: 45 10 36 1 44 9 35 0       | 1359.9378400 | 1359.9378433 |
| -0.0000033 -0.0003000 0.0000000 |              |              |
| 326: 46 10 37 1 45 9 36 0       | 1360.1915400 | 1360.1914228 |
| 0.0001172 -0.0003000 0.0000000  |              |              |
| 327: 47 10 38 1 46 9 37 0       | 1360.4447400 | 1360.4446421 |
| 0.0000979 -0.0003000 0.0000000  |              |              |
| 328: 49 10 40 1 48 9 39 0       | 1360.9501200 | 1360.9499576 |
| 0.0001624 -0.0003000 0.0000000  |              |              |
| 329: 50 10 41 1 49 9 40 0       | 1361.2022200 | 1361.2020317 |
| 0.0001883 -0.0003000 0.0000000  |              |              |
| 330: 51 10 42 1 50 9 41 0       | 1361.4533000 | 1361.4537018 |
| -0.0004018 -0.0003000 0.0000000 |              |              |
| 331: 52 10 43 1 51 9 42 0       | 1361.7050600 | 1361.7049562 |
| 0.0001038 -0.0003000 0.0000000  |              |              |
| 332: 53 10 44 1 52 9 43 0       | 1361.9557100 | 1361.9557832 |
| -0.0000732 -0.0003000 0.0000000 |              |              |
| 333: 55 10 46 1 54 9 45 0       | 1362.4557100 | 1362.4561068 |
| -0.0003968 -0.0003000 0.0000000 |              |              |
| 334: 56 10 47 1 55 9 46 0       | 1362.7059000 | 1362.7055786 |
| 0.0003214 -0.0003000 0.0000000  |              |              |
| 335: 10 10 0 1 9 9 1 0          | 1350.9035800 | 1350.9034076 |
| 0.0001724 -0.0003000 0.0000000  |              |              |
| 336: 11 10 1 1 10 9 2 0         | 1351.1648600 | 1351.1644655 |
| 0.0003945 -0.0003000 0.0000000  |              |              |
| 337: 12 10 2 1 11 9 3 0         | 1351.4254700 | 1351.4254074 |
| 0.0000626 -0.0003000 0.0000000  |              |              |
| 338: 13 10 3 1 12 9 4 0         | 1351.6865700 | 1351.6862298 |
| 0.0003402 -0.0003000 0.0000000  |              |              |
| 339: 14 10 4 1 13 9 5 0         | 1351.9472500 | 1351.9469289 |
| 0.0003211 -0.0003000 0.0000000  |              |              |
| 340: 16 10 6 1 15 9 7 0         | 1352.4677800 | 1352.4679420 |
| -0.0001620 -0.0003000 0.0000000 |              |              |
| 341: 17 10 7 1 16 9 8 0         | 1352.7283900 | 1352.7282475 |
| 0.0001425 -0.0003000 0.0000000  |              |              |
| 342: 18 10 8 1 17 9 9 0         | 1352.9883500 | 1352.9884131 |
| -0.0000631 -0.0003000 0.0000000 |              |              |
| 343: 19 10 9 1 18 9 10 0        | 1353.2481500 | 1353.2484340 |
| -0.0002840 -0.0003000 0.0000000 |              |              |
| 344: 20 10 10 1 19 9 11 0       | 1353.5082200 | 1353.5083053 |
| -0.0000853 -0.0003000 0.0000000 |              |              |
| 345: 21 10 11 1 20 9 12 0       | 1353.7681100 | 1353.7680219 |
| 0.0000881 -0.0003000 0.0000000  |              |              |
| 346: 22 10 12 1 21 9 13 0       | 1354.0274900 | 1354.0275784 |
| -0.0000884 -0.0003000 0.0000000 |              |              |
| 347: 23 10 13 1 22 9 14 0       | 1354.2868200 | 1354.2869693 |
| -0.0001493 -0.0003000 0.0000000 |              |              |
| 348: 24 10 14 1 23 9 15 0       | 1354.5461300 | 1354.5461888 |
| -0.0000588 -0.0003000 0.0000000 |              |              |
| 349: 27 10 17 1 26 9 18 0       | 1355.3231200 | 1355.3227584 |
| 0.0003616 -0.0003000 0.0000000  |              |              |
| 350: 28 10 18 1 27 9 19 0       | 1355.5813700 | 1355.5812308 |
| 0.0001392 -0.0003000 0.0000000  |              |              |
| 351: 29 10 19 1 28 9 20 0       | 1355.8393000 | 1355.8394999 |
| -0.0001999 -0.0003000 0.0000000 |              |              |
| 352: 30 10 20 1 29 9 21 0       | 1356.0974600 | 1356.0975587 |
| -0.0000987 -0.0003000 0.0000000 |              |              |
| 353: 31 10 21 1 30 9 22 0       | 1356.3553500 | 1356.3554002 |
| -0.0000502 -0.0003000 0.0000000 |              |              |
| 354: 32 10 22 1 31 9 23 0       | 1356.6130900 | 1356.6130169 |
| 0.0000731 -0.0003000 0.0000000  |              |              |
| 355: 33 10 23 1 32 9 24 0       | 1356.8707600 | 1356.8704011 |

|            |            |           |              |              |    |
|------------|------------|-----------|--------------|--------------|----|
| 0.0003589  | -0.0003000 | 0.0000000 |              |              |    |
| 356:       | 34         | 10        | 24           | 1            | 33 |
| 0.0005748  | -0.0003000 | 0.0000000 | 1357.1281200 | 1357.1275452 |    |
| 357:       | 35         | 10        | 25           | 1            | 34 |
| 0.0005190  | -0.0003000 | 0.0000000 | 1357.3849600 | 1357.3844410 |    |
| 358:       | 36         | 10        | 26           | 1            | 35 |
| -0.0002905 | -0.0003000 | 0.0000000 | 1357.6407900 | 1357.6410805 |    |
| 359:       | 37         | 10        | 27           | 1            | 36 |
| -0.0000551 | -0.0003000 | 0.0000000 | 1357.8974000 | 1357.8974551 |    |
| 360:       | 39         | 10        | 29           | 1            | 38 |
| 0.0002546  | -0.0003000 | 0.0000000 | 1358.4096300 | 1358.4093754 |    |
| 361:       | 40         | 10        | 30           | 1            | 39 |
| 0.0000069  | -0.0003000 | 0.0000000 | 1358.6649100 | 1358.6649031 |    |
| 362:       | 41         | 10        | 31           | 1            | 40 |
| 0.0000896  | -0.0003000 | 0.0000000 | 1358.9202200 | 1358.9201304 |    |
| 363:       | 42         | 10        | 32           | 1            | 41 |
| 0.0002522  | -0.0003000 | 0.0000000 | 1359.1753000 | 1359.1750478 |    |
| 364:       | 43         | 10        | 33           | 1            | 42 |
| 0.0001343  | -0.0003000 | 0.0000000 | 1359.4297800 | 1359.4296457 |    |
| 365:       | 44         | 10        | 34           | 1            | 43 |
| -0.0000042 | -0.0003000 | 0.0000000 | 1359.6839100 | 1359.6839142 |    |
| 366:       | 45         | 10        | 35           | 1            | 44 |
| -0.0000033 | -0.0003000 | 0.0000000 | 1359.9378400 | 1359.9378433 |    |
| 367:       | 46         | 10        | 36           | 1            | 45 |
| 0.0001172  | -0.0003000 | 0.0000000 | 1360.1915400 | 1360.1914228 |    |
| 368:       | 47         | 10        | 37           | 1            | 46 |
| 0.0000978  | -0.0003000 | 0.0000000 | 1360.4447400 | 1360.4446422 |    |
| 369:       | 49         | 10        | 39           | 1            | 48 |
| 0.0001622  | -0.0003000 | 0.0000000 | 1360.9501200 | 1360.9499578 |    |
| 370:       | 50         | 10        | 40           | 1            | 49 |
| 0.0001880  | -0.0003000 | 0.0000000 | 1361.2022200 | 1361.2020320 |    |
| 371:       | 51         | 10        | 41           | 1            | 50 |
| -0.0004021 | -0.0003000 | 0.0000000 | 1361.4533000 | 1361.4537021 |    |
| 372:       | 52         | 10        | 42           | 1            | 51 |
| 0.0001034  | -0.0003000 | 0.0000000 | 1361.7050600 | 1361.7049566 |    |
| 373:       | 53         | 10        | 43           | 1            | 52 |
| -0.0000738 | -0.0003000 | 0.0000000 | 1361.9557100 | 1361.9557838 |    |
| 374:       | 55         | 10        | 45           | 1            | 54 |
| -0.0003980 | -0.0003000 | 0.0000000 | 1362.4557100 | 1362.4561080 |    |
| 375:       | 56         | 10        | 46           | 1            | 55 |
| 0.0003196  | -0.0003000 | 0.0000000 | 1362.7059000 | 1362.7055804 |    |
| 376:       | 11         | 11        | 0            | 1            | 10 |
| -0.0001220 | -0.0003000 | 0.0000000 | 1353.4027700 | 1353.4028920 |    |
| 377:       | 12         | 11        | 1            | 1            | 11 |
| -0.0002115 | -0.0003000 | 0.0000000 | 1353.6637300 | 1353.6639415 |    |
| 378:       | 13         | 11        | 2            | 1            | 12 |
| -0.0001180 | -0.0003000 | 0.0000000 | 1353.9247600 | 1353.9248780 |    |
| 379:       | 14         | 11        | 3            | 1            | 13 |
| -0.0000984 | -0.0003000 | 0.0000000 | 1354.1856000 | 1354.1856984 |    |
| 380:       | 15         | 11        | 4            | 1            | 14 |
| 0.0003007  | -0.0003000 | 0.0000000 | 1354.4467000 | 1354.4463993 |    |
| 381:       | 16         | 11        | 5            | 1            | 15 |
| -0.0001973 | -0.0003000 | 0.0000000 | 1354.7067800 | 1354.7069773 |    |
| 382:       | 17         | 11        | 6            | 1            | 16 |
| -0.0000688 | -0.0003000 | 0.0000000 | 1354.9673600 | 1354.9674288 |    |
| 383:       | 18         | 11        | 7            | 1            | 17 |
| 0.0002501  | -0.0003000 | 0.0000000 | 1355.2280000 | 1355.2277499 |    |
| 384:       | 19         | 11        | 8            | 1            | 18 |
| -0.0000467 | -0.0003000 | 0.0000000 | 1355.4878900 | 1355.4879367 |    |
| 385:       | 20         | 11        | 9            | 1            | 19 |
| 0.0001250  | -0.0003000 | 0.0000000 | 1355.7481100 | 1355.7479850 |    |
| 386:       | 21         | 11        | 10           | 1            | 20 |
| -0.0001408 | -0.0003000 | 0.0000000 | 1356.0077500 | 1356.0078908 |    |
| 387:       | 22         | 11        | 11           | 1            | 21 |
| -0.0002495 | -0.0003000 | 0.0000000 | 1356.2674000 | 1356.2676495 |    |

|                                 |              |              |
|---------------------------------|--------------|--------------|
| 388: 23 11 12 1 22 10 13 0      | 1356.5271500 | 1356.5272566 |
| -0.0001066 -0.0003000 0.0000000 |              |              |
| 389: 24 11 13 1 23 10 14 0      | 1356.7865600 | 1356.7867073 |
| -0.0001473 -0.0003000 0.0000000 |              |              |
| 390: 25 11 14 1 24 10 15 0      | 1357.0455300 | 1357.0459969 |
| -0.0004669 -0.0003000 0.0000000 |              |              |
| 391: 27 11 16 1 26 10 17 0      | 1357.5640900 | 1357.5640724 |
| 0.0000176 -0.0003000 0.0000000  |              |              |
| 392: 28 11 17 1 27 10 18 0      | 1357.8229500 | 1357.8228478 |
| 0.0001022 -0.0003000 0.0000000  |              |              |
| 393: 29 11 18 1 28 10 19 0      | 1358.0810300 | 1358.0814410 |
| -0.0004110 -0.0003000 0.0000000 |              |              |
| 394: 30 11 19 1 29 10 20 0      | 1358.3404500 | 1358.3398465 |
| 0.0006035 -0.0003000 0.0000000  |              |              |
| 395: 31 11 20 1 30 10 21 0      | 1358.5980900 | 1358.5980585 |
| 0.0000315 -0.0003000 0.0000000  |              |              |
| 396: 32 11 21 1 31 10 22 0      | 1358.8562100 | 1358.8560711 |
| 0.0001389 -0.0003000 0.0000000  |              |              |
| 397: 33 11 22 1 32 10 23 0      | 1359.1138200 | 1359.1138782 |
| -0.0000582 -0.0003000 0.0000000 |              |              |
| 398: 34 11 23 1 33 10 24 0      | 1359.3720600 | 1359.3714736 |
| 0.0005864 -0.0003000 0.0000000  |              |              |
| 399: 35 11 24 1 34 10 25 0      | 1359.6289400 | 1359.6288510 |
| 0.0000890 -0.0003000 0.0000000  |              |              |
| 400: 36 11 25 1 35 10 26 0      | 1359.8858900 | 1359.8860038 |
| -0.0001138 -0.0003000 0.0000000 |              |              |
| 401: 37 11 26 1 36 10 27 0      | 1360.1428800 | 1360.1429255 |
| -0.0000455 -0.0003000 0.0000000 |              |              |
| 402: 38 11 27 1 37 10 28 0      | 1360.3990800 | 1360.3996091 |
| -0.0005291 -0.0003000 0.0000000 |              |              |
| 403: 39 11 28 1 38 10 29 0      | 1360.6558500 | 1360.6560478 |
| -0.0001978 -0.0003000 0.0000000 |              |              |
| 404: 40 11 29 1 39 10 30 0      | 1360.9122800 | 1360.9122345 |
| 0.0000455 -0.0003000 0.0000000  |              |              |
| 405: 41 11 30 1 40 10 31 0      | 1361.1677200 | 1361.1681620 |
| -0.0004420 -0.0003000 0.0000000 |              |              |
| 406: 42 11 31 1 41 10 32 0      | 1361.4238400 | 1361.4238228 |
| 0.0000172 -0.0003000 0.0000000  |              |              |
| 407: 43 11 32 1 42 10 33 0      | 1361.6792500 | 1361.6792095 |
| 0.0000405 -0.0003000 0.0000000  |              |              |
| 408: 44 11 33 1 43 10 34 0      | 1361.9341900 | 1361.9343143 |
| -0.0001243 -0.0003000 0.0000000 |              |              |
| 409: 45 11 34 1 44 10 35 0      | 1362.1887000 | 1362.1891295 |
| -0.0004295 -0.0003000 0.0000000 |              |              |
| 410: 46 11 35 1 45 10 36 0      | 1362.4437200 | 1362.4436471 |
| 0.0000729 -0.0003000 0.0000000  |              |              |
| 411: 47 11 36 1 46 10 37 0      | 1362.6975500 | 1362.6978590 |
| -0.0003090 -0.0003000 0.0000000 |              |              |
| 412: 51 11 40 1 50 10 41 0      | 1363.7116000 | 1363.7114825 |
| 0.0001175 -0.0003000 0.0000000  |              |              |
| 413: 53 11 42 1 52 10 43 0      | 1364.2162200 | 1364.2162385 |
| -0.0000185 -0.0003000 0.0000000 |              |              |
| 414: 54 11 43 1 53 10 44 0      | 1364.4680300 | 1364.4680713 |
| -0.0000413 -0.0003000 0.0000000 |              |              |
| 415: 55 11 44 1 54 10 45 0      | 1364.7191700 | 1364.7195283 |
| -0.0003583 -0.0003000 0.0000000 |              |              |
| 416: 58 11 47 1 57 10 48 0      | 1365.4714000 | 1365.4715492 |
| -0.0001492 -0.0003000 0.0000000 |              |              |
| 417: 59 11 48 1 58 10 49 0      | 1365.7217100 | 1365.7214071 |
| 0.0003029 -0.0003000 0.0000000  |              |              |
| 418: 60 11 49 1 59 10 50 0      | 1365.9708400 | 1365.9708404 |
| -0.0000004 -0.0003000 0.0000000 |              |              |
| 419: 11 11 1 1 10 10 0 0        | 1353.4027700 | 1353.4028920 |
| -0.0001220 -0.0003000 0.0000000 |              |              |
| 420: 12 11 2 1 11 10 1 0        | 1353.6637300 | 1353.6639415 |

|              |            |           |   |              |
|--------------|------------|-----------|---|--------------|
| -0.0002115   | -0.0003000 | 0.0000000 |   |              |
| 421: 13      | 11         | 3         | 1 | 12 10 2 0    |
| 1353.9247600 |            |           |   | 1353.9248780 |
| -0.0001180   | -0.0003000 | 0.0000000 |   |              |
| 422: 14      | 11         | 4         | 1 | 13 10 3 0    |
| 1354.1856000 |            |           |   | 1354.1856984 |
| -0.0000984   | -0.0003000 | 0.0000000 |   |              |
| 423: 15      | 11         | 5         | 1 | 14 10 4 0    |
| 1354.4467000 |            |           |   | 1354.4463993 |
| 0.0003007    | -0.0003000 | 0.0000000 |   |              |
| 424: 16      | 11         | 6         | 1 | 15 10 5 0    |
| 1354.7067800 |            |           |   | 1354.7069773 |
| -0.0001973   | -0.0003000 | 0.0000000 |   |              |
| 425: 17      | 11         | 7         | 1 | 16 10 6 0    |
| 1354.9673600 |            |           |   | 1354.9674288 |
| -0.0000688   | -0.0003000 | 0.0000000 |   |              |
| 426: 18      | 11         | 8         | 1 | 17 10 7 0    |
| 1355.2280000 |            |           |   | 1355.2277499 |
| 0.0002501    | -0.0003000 | 0.0000000 |   |              |
| 427: 19      | 11         | 9         | 1 | 18 10 8 0    |
| 1355.4878900 |            |           |   | 1355.4879367 |
| -0.0000467   | -0.0003000 | 0.0000000 |   |              |
| 428: 20      | 11         | 10        | 1 | 19 10 9 0    |
| 1355.7481100 |            |           |   | 1355.7479850 |
| 0.0001250    | -0.0003000 | 0.0000000 |   |              |
| 429: 21      | 11         | 11        | 1 | 20 10 10 0   |
| 1356.0077500 |            |           |   | 1356.0078908 |
| -0.0001408   | -0.0003000 | 0.0000000 |   |              |
| 430: 22      | 11         | 12        | 1 | 21 10 11 0   |
| 1356.2674000 |            |           |   | 1356.2676495 |
| -0.0002495   | -0.0003000 | 0.0000000 |   |              |
| 431: 23      | 11         | 13        | 1 | 22 10 12 0   |
| 1356.5271500 |            |           |   | 1356.5272566 |
| -0.0001066   | -0.0003000 | 0.0000000 |   |              |
| 432: 24      | 11         | 14        | 1 | 23 10 13 0   |
| 1356.7865600 |            |           |   | 1356.7867073 |
| -0.0001473   | -0.0003000 | 0.0000000 |   |              |
| 433: 25      | 11         | 15        | 1 | 24 10 14 0   |
| 1357.0455300 |            |           |   | 1357.0459969 |
| -0.0004669   | -0.0003000 | 0.0000000 |   |              |
| 434: 27      | 11         | 17        | 1 | 26 10 16 0   |
| 1357.5640900 |            |           |   | 1357.5640724 |
| 0.0000176    | -0.0003000 | 0.0000000 |   |              |
| 435: 28      | 11         | 18        | 1 | 27 10 17 0   |
| 1357.8229500 |            |           |   | 1357.8228478 |
| 0.0001022    | -0.0003000 | 0.0000000 |   |              |
| 436: 29      | 11         | 19        | 1 | 28 10 18 0   |
| 1358.0810300 |            |           |   | 1358.0814410 |
| -0.0004110   | -0.0003000 | 0.0000000 |   |              |
| 437: 30      | 11         | 20        | 1 | 29 10 19 0   |
| 1358.3404500 |            |           |   | 1358.3398465 |
| 0.0006035    | -0.0003000 | 0.0000000 |   |              |
| 438: 31      | 11         | 21        | 1 | 30 10 20 0   |
| 1358.5980900 |            |           |   | 1358.5980585 |
| 0.0000315    | -0.0003000 | 0.0000000 |   |              |
| 439: 32      | 11         | 22        | 1 | 31 10 21 0   |
| 1358.8562100 |            |           |   | 1358.8560711 |
| 0.0001389    | -0.0003000 | 0.0000000 |   |              |
| 440: 33      | 11         | 23        | 1 | 32 10 22 0   |
| 1359.1138200 |            |           |   | 1359.1138782 |
| -0.0000582   | -0.0003000 | 0.0000000 |   |              |
| 441: 34      | 11         | 24        | 1 | 33 10 23 0   |
| 1359.3720600 |            |           |   | 1359.3714736 |
| 0.0005864    | -0.0003000 | 0.0000000 |   |              |
| 442: 35      | 11         | 25        | 1 | 34 10 24 0   |
| 1359.6289400 |            |           |   | 1359.6288510 |
| 0.0000890    | -0.0003000 | 0.0000000 |   |              |
| 443: 36      | 11         | 26        | 1 | 35 10 25 0   |
| 1359.8858900 |            |           |   | 1359.8860038 |
| -0.0001138   | -0.0003000 | 0.0000000 |   |              |
| 444: 37      | 11         | 27        | 1 | 36 10 26 0   |
| 1360.1428800 |            |           |   | 1360.1429255 |
| -0.0000455   | -0.0003000 | 0.0000000 |   |              |
| 445: 38      | 11         | 28        | 1 | 37 10 27 0   |
| 1360.3990800 |            |           |   | 1360.3996091 |
| -0.0005291   | -0.0003000 | 0.0000000 |   |              |
| 446: 39      | 11         | 29        | 1 | 38 10 28 0   |
| 1360.6558500 |            |           |   | 1360.6560478 |
| -0.0001978   | -0.0003000 | 0.0000000 |   |              |
| 447: 40      | 11         | 30        | 1 | 39 10 29 0   |
| 1360.9122800 |            |           |   | 1360.9122345 |
| 0.0000455    | -0.0003000 | 0.0000000 |   |              |
| 448: 41      | 11         | 31        | 1 | 40 10 30 0   |
| 1361.1677200 |            |           |   | 1361.1681620 |
| -0.0004420   | -0.0003000 | 0.0000000 |   |              |
| 449: 42      | 11         | 32        | 1 | 41 10 31 0   |
| 1361.4238400 |            |           |   | 1361.4238228 |
| 0.0000172    | -0.0003000 | 0.0000000 |   |              |
| 450: 43      | 11         | 33        | 1 | 42 10 32 0   |
| 1361.6792500 |            |           |   | 1361.6792095 |
| 0.0000405    | -0.0003000 | 0.0000000 |   |              |
| 451: 44      | 11         | 34        | 1 | 43 10 33 0   |
| 1361.9341900 |            |           |   | 1361.9343143 |
| -0.0001243   | -0.0003000 | 0.0000000 |   |              |
| 452: 45      | 11         | 35        | 1 | 44 10 34 0   |
| 1362.1887000 |            |           |   | 1362.1891295 |
| -0.0004295   | -0.0003000 | 0.0000000 |   |              |

|                                 |              |              |
|---------------------------------|--------------|--------------|
| 453: 46 11 36 1 45 10 35 0      | 1362.4437200 | 1362.4436471 |
| 0.0000729 -0.0003000 0.0000000  |              |              |
| 454: 47 11 37 1 46 10 36 0      | 1362.6975500 | 1362.6978590 |
| -0.0003090 -0.0003000 0.0000000 |              |              |
| 455: 51 11 41 1 50 10 40 0      | 1363.7116000 | 1363.7114825 |
| 0.0001175 -0.0003000 0.0000000  |              |              |
| 456: 53 11 43 1 52 10 42 0      | 1364.2162200 | 1364.2162385 |
| -0.0000185 -0.0003000 0.0000000 |              |              |
| 457: 54 11 44 1 53 10 43 0      | 1364.4680300 | 1364.4680713 |
| -0.0000413 -0.0003000 0.0000000 |              |              |
| 458: 55 11 45 1 54 10 44 0      | 1364.7191700 | 1364.7195283 |
| -0.0003583 -0.0003000 0.0000000 |              |              |
| 459: 58 11 48 1 57 10 47 0      | 1365.4714000 | 1365.4715492 |
| -0.0001492 -0.0003000 0.0000000 |              |              |
| 460: 59 11 49 1 58 10 48 0      | 1365.7217100 | 1365.7214070 |
| 0.0003030 -0.0003000 0.0000000  |              |              |
| 461: 60 11 50 1 59 10 49 0      | 1365.9708400 | 1365.9708403 |
| -0.0000003 -0.0003000 0.0000000 |              |              |
| 462: 12 12 0 1 11 11 1 0        | 1355.8695300 | 1355.8693464 |
| 0.0001836 -0.0003000 0.0000000  |              |              |
| 463: 14 12 2 1 13 11 3 0        | 1356.3913000 | 1356.3913392 |
| -0.0000392 -0.0003000 0.0000000 |              |              |
| 464: 15 12 3 1 14 11 4 0        | 1356.6519000 | 1356.6521675 |
| -0.0002675 -0.0003000 0.0000000 |              |              |
| 465: 16 12 4 1 15 11 5 0        | 1356.9125600 | 1356.9128796 |
| -0.0003196 -0.0003000 0.0000000 |              |              |
| 466: 17 12 5 1 16 11 6 0        | 1357.1738900 | 1357.1734724 |
| 0.0004176 -0.0003000 0.0000000  |              |              |
| 467: 18 12 6 1 17 11 7 0        | 1357.4343700 | 1357.4339425 |
| 0.0004275 -0.0003000 0.0000000  |              |              |
| 468: 19 12 7 1 18 11 8 0        | 1357.6942700 | 1357.6942865 |
| -0.0000165 -0.0003000 0.0000000 |              |              |
| 469: 20 12 8 1 19 11 9 0        | 1357.9541700 | 1357.9545009 |
| -0.0003309 -0.0003000 0.0000000 |              |              |
| 470: 21 12 9 1 20 11 10 0       | 1358.2146800 | 1358.2145819 |
| 0.0000981 -0.0003000 0.0000000  |              |              |
| 471: 22 12 10 1 21 11 11 0      | 1358.4743100 | 1358.4745258 |
| -0.0002158 -0.0003000 0.0000000 |              |              |
| 472: 23 12 11 1 22 11 12 0      | 1358.7343400 | 1358.7343287 |
| 0.0000113 -0.0003000 0.0000000  |              |              |
| 473: 24 12 12 1 23 11 13 0      | 1358.9939200 | 1358.9939865 |
| -0.0000665 -0.0003000 0.0000000 |              |              |
| 474: 25 12 13 1 24 11 14 0      | 1359.2535600 | 1359.2534952 |
| 0.0000648 -0.0003000 0.0000000  |              |              |
| 475: 26 12 14 1 25 11 15 0      | 1359.5129800 | 1359.5128504 |
| 0.0001296 -0.0003000 0.0000000  |              |              |
| 476: 27 12 15 1 26 11 16 0      | 1359.7717600 | 1359.7720479 |
| -0.0002879 -0.0003000 0.0000000 |              |              |
| 477: 28 12 16 1 27 11 17 0      | 1360.0309900 | 1360.0310831 |
| -0.0000931 -0.0003000 0.0000000 |              |              |
| 478: 29 12 17 1 28 11 18 0      | 1360.2898900 | 1360.2899514 |
| -0.0000614 -0.0003000 0.0000000 |              |              |
| 479: 30 12 18 1 29 11 19 0      | 1360.5485200 | 1360.5486481 |
| -0.0001281 -0.0003000 0.0000000 |              |              |
| 480: 31 12 19 1 30 11 20 0      | 1360.8074000 | 1360.8071684 |
| 0.0002316 -0.0003000 0.0000000  |              |              |
| 481: 32 12 20 1 31 11 21 0      | 1361.0651800 | 1361.0655075 |
| -0.0003275 -0.0003000 0.0000000 |              |              |
| 482: 33 12 21 1 32 11 22 0      | 1361.3239400 | 1361.3236601 |
| 0.0002799 -0.0003000 0.0000000  |              |              |
| 483: 34 12 22 1 33 11 23 0      | 1361.5818900 | 1361.5816212 |
| 0.0002688 -0.0003000 0.0000000  |              |              |
| 484: 35 12 23 1 34 11 24 0      | 1361.8398700 | 1361.8393855 |
| 0.0004845 -0.0003000 0.0000000  |              |              |
| 485: 36 12 24 1 35 11 25 0      | 1362.0968100 | 1362.0969476 |

|            |            |           |              |              |
|------------|------------|-----------|--------------|--------------|
| -0.0001376 | -0.0003000 | 0.0000000 |              |              |
| 486:       | 37         | 12        | 25           | 1 36 11 26 0 |
| 0.0002579  | -0.0003000 | 0.0000000 | 1362.3545600 | 1362.3543021 |
| 487:       | 38         | 12        | 26           | 1 37 11 27 0 |
| 0.0001867  | -0.0003000 | 0.0000000 | 1362.6116300 | 1362.6114433 |
| 488:       | 39         | 12        | 27           | 1 38 11 28 0 |
| -0.0000855 | -0.0003000 | 0.0000000 | 1362.8682800 | 1362.8683655 |
| 489:       | 40         | 12        | 28           | 1 39 11 29 0 |
| 0.0000572  | -0.0003000 | 0.0000000 | 1363.1251200 | 1363.1250628 |
| 490:       | 41         | 12        | 29           | 1 40 11 30 0 |
| 0.0001705  | -0.0003000 | 0.0000000 | 1363.3817000 | 1363.3815295 |
| 491:       | 42         | 12        | 30           | 1 41 11 31 0 |
| -0.0006394 | -0.0003000 | 0.0000000 | 1363.6371200 | 1363.6377594 |
| 492:       | 43         | 12        | 31           | 1 42 11 32 0 |
| -0.0000263 | -0.0003000 | 0.0000000 | 1363.8937200 | 1363.8937463 |
| 493:       | 44         | 12        | 32           | 1 43 11 33 0 |
| -0.0005841 | -0.0003000 | 0.0000000 | 1364.1489000 | 1364.1494841 |
| 494:       | 45         | 12        | 33           | 1 44 11 34 0 |
| -0.0001163 | -0.0003000 | 0.0000000 | 1364.4048500 | 1364.4049663 |
| 495:       | 46         | 12        | 34           | 1 45 11 35 0 |
| 0.0004734  | -0.0003000 | 0.0000000 | 1364.6606600 | 1364.6601866 |
| 496:       | 47         | 12        | 35           | 1 46 11 36 0 |
| 0.0001618  | -0.0003000 | 0.0000000 | 1364.9153000 | 1364.9151382 |
| 497:       | 49         | 12        | 37           | 1 48 11 38 0 |
| -0.0002789 | -0.0003000 | 0.0000000 | 1365.4239300 | 1365.4242089 |
| 498:       | 50         | 12        | 38           | 1 49 11 39 0 |
| -0.0002243 | -0.0003000 | 0.0000000 | 1365.6780900 | 1365.6783143 |
| 499:       | 51         | 12        | 39           | 1 50 11 40 0 |
| -0.0010937 | -0.0003000 | 0.0000000 | 1365.9310300 | 1365.9321237 |
| 500:       | 52         | 12        | 40           | 1 51 11 41 0 |
| -0.0005700 | -0.0003000 | 0.0000000 | 1366.1850600 | 1366.1856300 |
| 501:       | 53         | 12        | 41           | 1 52 11 42 0 |
| -0.0006060 | -0.0003000 | 0.0000000 | 1366.4382200 | 1366.4388260 |
| 502:       | 12         | 12        | 1            | 1 11 11 0 0  |
| 0.0001836  | -0.0003000 | 0.0000000 | 1355.8695300 | 1355.8693464 |
| 503:       | 14         | 12        | 3            | 1 13 11 2 0  |
| -0.0000392 | -0.0003000 | 0.0000000 | 1356.3913000 | 1356.3913392 |
| 504:       | 15         | 12        | 4            | 1 14 11 3 0  |
| -0.0002675 | -0.0003000 | 0.0000000 | 1356.6519000 | 1356.6521675 |
| 505:       | 16         | 12        | 5            | 1 15 11 4 0  |
| -0.0003196 | -0.0003000 | 0.0000000 | 1356.9125600 | 1356.9128796 |
| 506:       | 17         | 12        | 6            | 1 16 11 5 0  |
| 0.0004176  | -0.0003000 | 0.0000000 | 1357.1738900 | 1357.1734724 |
| 507:       | 18         | 12        | 7            | 1 17 11 6 0  |
| 0.0004275  | -0.0003000 | 0.0000000 | 1357.4343700 | 1357.4339425 |
| 508:       | 19         | 12        | 8            | 1 18 11 7 0  |
| -0.0000165 | -0.0003000 | 0.0000000 | 1357.6942700 | 1357.6942865 |
| 509:       | 20         | 12        | 9            | 1 19 11 8 0  |
| -0.0003309 | -0.0003000 | 0.0000000 | 1357.9541700 | 1357.9545009 |
| 510:       | 21         | 12        | 10           | 1 20 11 9 0  |
| 0.0000981  | -0.0003000 | 0.0000000 | 1358.2146800 | 1358.2145819 |
| 511:       | 22         | 12        | 11           | 1 21 11 10 0 |
| -0.0002158 | -0.0003000 | 0.0000000 | 1358.4743100 | 1358.4745258 |
| 512:       | 23         | 12        | 12           | 1 22 11 11 0 |
| 0.0000113  | -0.0003000 | 0.0000000 | 1358.7343400 | 1358.7343287 |
| 513:       | 24         | 12        | 13           | 1 23 11 12 0 |
| -0.0000665 | -0.0003000 | 0.0000000 | 1358.9939200 | 1358.9939865 |
| 514:       | 25         | 12        | 14           | 1 24 11 13 0 |
| 0.0000648  | -0.0003000 | 0.0000000 | 1359.2535600 | 1359.2534952 |
| 515:       | 26         | 12        | 15           | 1 25 11 14 0 |
| 0.0001296  | -0.0003000 | 0.0000000 | 1359.5129800 | 1359.5128504 |
| 516:       | 27         | 12        | 16           | 1 26 11 15 0 |
| -0.0002879 | -0.0003000 | 0.0000000 | 1359.7717600 | 1359.7720479 |
| 517:       | 28         | 12        | 17           | 1 27 11 16 0 |
| -0.0000931 | -0.0003000 | 0.0000000 | 1360.0309900 | 1360.0310831 |

|            |            |           |    |   |    |    |    |   |              |              |
|------------|------------|-----------|----|---|----|----|----|---|--------------|--------------|
| 518:       | 29         | 12        | 18 | 1 | 28 | 11 | 17 | 0 | 1360.2898900 | 1360.2899514 |
| -0.0000614 | -0.0003000 | 0.0000000 |    |   |    |    |    |   |              |              |
| 519:       | 30         | 12        | 19 | 1 | 29 | 11 | 18 | 0 | 1360.5485200 | 1360.5486481 |
| -0.0001281 | -0.0003000 | 0.0000000 |    |   |    |    |    |   |              |              |
| 520:       | 31         | 12        | 20 | 1 | 30 | 11 | 19 | 0 | 1360.8074000 | 1360.8071684 |
| 0.0002316  | -0.0003000 | 0.0000000 |    |   |    |    |    |   |              |              |
| 521:       | 32         | 12        | 21 | 1 | 31 | 11 | 20 | 0 | 1361.0651800 | 1361.0655075 |
| -0.0003275 | -0.0003000 | 0.0000000 |    |   |    |    |    |   |              |              |
| 522:       | 33         | 12        | 22 | 1 | 32 | 11 | 21 | 0 | 1361.3239400 | 1361.3236601 |
| 0.0002799  | -0.0003000 | 0.0000000 |    |   |    |    |    |   |              |              |
| 523:       | 34         | 12        | 23 | 1 | 33 | 11 | 22 | 0 | 1361.5818900 | 1361.5816212 |
| 0.0002688  | -0.0003000 | 0.0000000 |    |   |    |    |    |   |              |              |
| 524:       | 35         | 12        | 24 | 1 | 34 | 11 | 23 | 0 | 1361.8398700 | 1361.8393855 |
| 0.0004845  | -0.0003000 | 0.0000000 |    |   |    |    |    |   |              |              |
| 525:       | 36         | 12        | 25 | 1 | 35 | 11 | 24 | 0 | 1362.0968100 | 1362.0969476 |
| -0.0001376 | -0.0003000 | 0.0000000 |    |   |    |    |    |   |              |              |
| 526:       | 37         | 12        | 26 | 1 | 36 | 11 | 25 | 0 | 1362.3545600 | 1362.3543021 |
| 0.0002579  | -0.0003000 | 0.0000000 |    |   |    |    |    |   |              |              |
| 527:       | 38         | 12        | 27 | 1 | 37 | 11 | 26 | 0 | 1362.6116300 | 1362.6114433 |
| 0.0001867  | -0.0003000 | 0.0000000 |    |   |    |    |    |   |              |              |
| 528:       | 39         | 12        | 28 | 1 | 38 | 11 | 27 | 0 | 1362.8682800 | 1362.8683655 |
| -0.0000855 | -0.0003000 | 0.0000000 |    |   |    |    |    |   |              |              |
| 529:       | 40         | 12        | 29 | 1 | 39 | 11 | 28 | 0 | 1363.1251200 | 1363.1250628 |
| 0.0000572  | -0.0003000 | 0.0000000 |    |   |    |    |    |   |              |              |
| 530:       | 41         | 12        | 30 | 1 | 40 | 11 | 29 | 0 | 1363.3817000 | 1363.3815295 |
| 0.0001705  | -0.0003000 | 0.0000000 |    |   |    |    |    |   |              |              |
| 531:       | 42         | 12        | 31 | 1 | 41 | 11 | 30 | 0 | 1363.6371200 | 1363.6377594 |
| -0.0006394 | -0.0003000 | 0.0000000 |    |   |    |    |    |   |              |              |
| 532:       | 43         | 12        | 32 | 1 | 42 | 11 | 31 | 0 | 1363.8937200 | 1363.8937463 |
| -0.0000263 | -0.0003000 | 0.0000000 |    |   |    |    |    |   |              |              |
| 533:       | 44         | 12        | 33 | 1 | 43 | 11 | 32 | 0 | 1364.1489000 | 1364.1494841 |
| -0.0005841 | -0.0003000 | 0.0000000 |    |   |    |    |    |   |              |              |
| 534:       | 45         | 12        | 34 | 1 | 44 | 11 | 33 | 0 | 1364.4048500 | 1364.4049663 |
| -0.0001163 | -0.0003000 | 0.0000000 |    |   |    |    |    |   |              |              |
| 535:       | 46         | 12        | 35 | 1 | 45 | 11 | 34 | 0 | 1364.6606600 | 1364.6601866 |
| 0.0004734  | -0.0003000 | 0.0000000 |    |   |    |    |    |   |              |              |
| 536:       | 47         | 12        | 36 | 1 | 46 | 11 | 35 | 0 | 1364.9153000 | 1364.9151382 |
| 0.0001618  | -0.0003000 | 0.0000000 |    |   |    |    |    |   |              |              |
| 537:       | 49         | 12        | 38 | 1 | 48 | 11 | 37 | 0 | 1365.4239300 | 1365.4242089 |
| -0.0002789 | -0.0003000 | 0.0000000 |    |   |    |    |    |   |              |              |
| 538:       | 50         | 12        | 39 | 1 | 49 | 11 | 38 | 0 | 1365.6780900 | 1365.6783143 |
| -0.0002243 | -0.0003000 | 0.0000000 |    |   |    |    |    |   |              |              |
| 539:       | 51         | 12        | 40 | 1 | 50 | 11 | 39 | 0 | 1365.9310300 | 1365.9321237 |
| -0.0010937 | -0.0003000 | 0.0000000 |    |   |    |    |    |   |              |              |
| 540:       | 52         | 12        | 41 | 1 | 51 | 11 | 40 | 0 | 1366.1850600 | 1366.1856300 |
| -0.0005700 | -0.0003000 | 0.0000000 |    |   |    |    |    |   |              |              |
| 541:       | 53         | 12        | 42 | 1 | 52 | 11 | 41 | 0 | 1366.4382200 | 1366.4388260 |
| -0.0006060 | -0.0003000 | 0.0000000 |    |   |    |    |    |   |              |              |
| 542:       | 55         | 12        | 44 | 1 | 54 | 11 | 43 | 0 | 1366.9438600 | 1366.9442579 |
| -0.0003979 | -0.0003000 | 0.0000000 |    |   |    |    |    |   |              |              |
| 543:       | 13         | 13        | 0  | 1 | 12 | 12 | 1  | 0 | 1358.3019800 | 1358.3019580 |
| 0.0000220  | -0.0003000 | 0.0000000 |    |   |    |    |    |   |              |              |
| 544:       | 14         | 13        | 1  | 1 | 13 | 12 | 2  | 0 | 1358.5630900 | 1358.5630211 |
| 0.0000689  | -0.0003000 | 0.0000000 |    |   |    |    |    |   |              |              |
| 545:       | 15         | 13        | 2  | 1 | 14 | 12 | 3  | 0 | 1358.8237700 | 1358.8239767 |
| -0.0002067 | -0.0003000 | 0.0000000 |    |   |    |    |    |   |              |              |
| 546:       | 16         | 13        | 3  | 1 | 15 | 12 | 4  | 0 | 1359.0847200 | 1359.0848221 |
| -0.0001021 | -0.0003000 | 0.0000000 |    |   |    |    |    |   |              |              |
| 547:       | 17         | 13        | 4  | 1 | 16 | 12 | 5  | 0 | 1359.3458600 | 1359.3455543 |
| 0.0003057  | -0.0003000 | 0.0000000 |    |   |    |    |    |   |              |              |
| 548:       | 18         | 13        | 5  | 1 | 17 | 12 | 6  | 0 | 1359.6060200 | 1359.6061703 |
| -0.0001503 | -0.0003000 | 0.0000000 |    |   |    |    |    |   |              |              |
| 549:       | 19         | 13        | 6  | 1 | 18 | 12 | 7  | 0 | 1359.8666300 | 1359.8666670 |
| -0.0000370 | -0.0003000 | 0.0000000 |    |   |    |    |    |   |              |              |
| 550:       | 20         | 13        | 7  | 1 | 19 | 12 | 8  | 0 | 1360.1272700 | 1360.1270412 |

|            |            |           |    |   |                           |
|------------|------------|-----------|----|---|---------------------------|
| 0.0002288  | -0.0003000 | 0.0000000 |    |   |                           |
| 551:       | 21         | 13        | 8  | 1 | 20 12 9 0                 |
| 0.0001803  | -0.0003000 | 0.0000000 |    |   | 1360.3874700 1360.3872897 |
| 552:       | 22         | 13        | 9  | 1 | 21 12 10 0                |
| -0.0003391 | -0.0003000 | 0.0000000 |    |   | 1360.6470700 1360.6474091 |
| 553:       | 23         | 13        | 10 | 1 | 22 12 11 0                |
| -0.0000160 | -0.0003000 | 0.0000000 |    |   | 1360.9073800 1360.9073960 |
| 554:       | 25         | 13        | 12 | 1 | 24 12 13 0                |
| -0.0001377 | -0.0003000 | 0.0000000 |    |   | 1361.4268200 1361.4269577 |
| 555:       | 26         | 13        | 13 | 1 | 25 12 14 0                |
| 0.0001448  | -0.0003000 | 0.0000000 |    |   | 1361.6866700 1361.6865252 |
| 556:       | 27         | 13        | 14 | 1 | 26 12 15 0                |
| 0.0006746  | -0.0003000 | 0.0000000 |    |   | 1361.9466200 1361.9459454 |
| 557:       | 28         | 13        | 15 | 1 | 27 12 16 0                |
| 0.0004056  | -0.0003000 | 0.0000000 |    |   | 1362.2056200 1362.2052144 |
| 558:       | 29         | 13        | 16 | 1 | 28 12 17 0                |
| -0.0002982 | -0.0003000 | 0.0000000 |    |   | 1362.4640300 1362.4643282 |
| 559:       | 30         | 13        | 17 | 1 | 29 12 18 0                |
| -0.0001028 | -0.0003000 | 0.0000000 |    |   | 1362.7231800 1362.7232828 |
| 560:       | 31         | 13        | 18 | 1 | 30 12 19 0                |
| -0.0001638 | -0.0003000 | 0.0000000 |    |   | 1362.9819100 1362.9820738 |
| 561:       | 32         | 13        | 19 | 1 | 31 12 20 0                |
| -0.0002371 | -0.0003000 | 0.0000000 |    |   | 1363.2404600 1363.2406971 |
| 562:       | 33         | 13        | 20 | 1 | 32 12 21 0                |
| 0.0005616  | -0.0003000 | 0.0000000 |    |   | 1363.4997100 1363.4991484 |
| 563:       | 35         | 13        | 22 | 1 | 34 12 23 0                |
| -0.0000768 | -0.0003000 | 0.0000000 |    |   | 1364.0154400 1364.0155168 |
| 564:       | 36         | 13        | 23 | 1 | 35 12 24 0                |
| 0.0004151  | -0.0003000 | 0.0000000 |    |   | 1364.2738400 1364.2734249 |
| 565:       | 37         | 13        | 24 | 1 | 36 12 25 0                |
| 0.0001874  | -0.0003000 | 0.0000000 |    |   | 1364.5313300 1364.5311426 |
| 566:       | 38         | 13        | 25 | 1 | 37 12 26 0                |
| -0.0002451 | -0.0003000 | 0.0000000 |    |   | 1364.7884200 1364.7886651 |
| 567:       | 39         | 13        | 26 | 1 | 38 12 27 0                |
| 0.0000123  | -0.0003000 | 0.0000000 |    |   | 1365.0460000 1365.0459877 |
| 568:       | 40         | 13        | 27 | 1 | 39 12 28 0                |
| 0.0004847  | -0.0003000 | 0.0000000 |    |   | 1365.3035900 1365.3031053 |
| 569:       | 41         | 13        | 28 | 1 | 40 12 29 0                |
| -0.0000129 | -0.0003000 | 0.0000000 |    |   | 1365.5600000 1365.5600129 |
| 570:       | 42         | 13        | 29 | 1 | 41 12 30 0                |
| 0.0002646  | -0.0003000 | 0.0000000 |    |   | 1365.8169700 1365.8167054 |
| 571:       | 43         | 13        | 30 | 1 | 42 12 31 0                |
| -0.0001875 | -0.0003000 | 0.0000000 |    |   | 1366.0729900 1366.0731775 |
| 572:       | 44         | 13        | 31 | 1 | 43 12 32 0                |
| 0.0003959  | -0.0003000 | 0.0000000 |    |   | 1366.3298200 1366.3294241 |
| 573:       | 45         | 13        | 32 | 1 | 44 12 33 0                |
| 0.0000604  | -0.0003000 | 0.0000000 |    |   | 1366.5855000 1366.5854396 |
| 574:       | 47         | 13        | 34 | 1 | 46 12 35 0                |
| -0.0003759 | -0.0003000 | 0.0000000 |    |   | 1367.0963800 1367.0967559 |
| 575:       | 48         | 13        | 35 | 1 | 47 12 36 0                |
| -0.0000854 | -0.0003000 | 0.0000000 |    |   | 1367.3519600 1367.3520454 |
| 576:       | 49         | 13        | 36 | 1 | 48 12 37 0                |
| -0.0000817 | -0.0003000 | 0.0000000 |    |   | 1367.6070000 1367.6070817 |
| 577:       | 50         | 13        | 37 | 1 | 49 12 38 0                |
| 0.0000612  | -0.0003000 | 0.0000000 |    |   | 1367.8619200 1367.8618588 |
| 578:       | 51         | 13        | 38 | 1 | 50 12 39 0                |
| -0.0005210 | -0.0003000 | 0.0000000 |    |   | 1368.1158500 1368.1163710 |
| 579:       | 52         | 13        | 39 | 1 | 51 12 40 0                |
| 0.0002677  | -0.0003000 | 0.0000000 |    |   | 1368.3708800 1368.3706123 |
| 580:       | 54         | 13        | 41 | 1 | 53 12 42 0                |
| 0.0003418  | -0.0003000 | 0.0000000 |    |   | 1368.8786000 1368.8782582 |
| 581:       | 55         | 13        | 42 | 1 | 54 12 43 0                |
| 0.0002296  | -0.0003000 | 0.0000000 |    |   | 1369.1318800 1369.1316504 |
| 582:       | 13         | 13        | 1  | 1 | 12 12 0 0                 |
| 0.0000220  | -0.0003000 | 0.0000000 |    |   | 1358.3019800 1358.3019580 |

|      |            |            |           |   |    |    |    |   |              |              |
|------|------------|------------|-----------|---|----|----|----|---|--------------|--------------|
| 583: | 14         | 13         | 2         | 1 | 13 | 12 | 1  | 0 | 1358.5630900 | 1358.5630211 |
|      | 0.0000689  | -0.0003000 | 0.0000000 |   |    |    |    |   |              |              |
| 584: | 15         | 13         | 3         | 1 | 14 | 12 | 2  | 0 | 1358.8237700 | 1358.8239767 |
|      | -0.0002067 | -0.0003000 | 0.0000000 |   |    |    |    |   |              |              |
| 585: | 16         | 13         | 4         | 1 | 15 | 12 | 3  | 0 | 1359.0847200 | 1359.0848221 |
|      | -0.0001021 | -0.0003000 | 0.0000000 |   |    |    |    |   |              |              |
| 586: | 17         | 13         | 5         | 1 | 16 | 12 | 4  | 0 | 1359.3458600 | 1359.3455543 |
|      | 0.0003057  | -0.0003000 | 0.0000000 |   |    |    |    |   |              |              |
| 587: | 18         | 13         | 6         | 1 | 17 | 12 | 5  | 0 | 1359.6060200 | 1359.6061703 |
|      | -0.0001503 | -0.0003000 | 0.0000000 |   |    |    |    |   |              |              |
| 588: | 19         | 13         | 7         | 1 | 18 | 12 | 6  | 0 | 1359.8666300 | 1359.8666670 |
|      | -0.0000370 | -0.0003000 | 0.0000000 |   |    |    |    |   |              |              |
| 589: | 20         | 13         | 8         | 1 | 19 | 12 | 7  | 0 | 1360.1272700 | 1360.1270412 |
|      | 0.0002288  | -0.0003000 | 0.0000000 |   |    |    |    |   |              |              |
| 590: | 21         | 13         | 9         | 1 | 20 | 12 | 8  | 0 | 1360.3874700 | 1360.3872897 |
|      | 0.0001803  | -0.0003000 | 0.0000000 |   |    |    |    |   |              |              |
| 591: | 22         | 13         | 10        | 1 | 21 | 12 | 9  | 0 | 1360.6470700 | 1360.6474091 |
|      | -0.0003391 | -0.0003000 | 0.0000000 |   |    |    |    |   |              |              |
| 592: | 23         | 13         | 11        | 1 | 22 | 12 | 10 | 0 | 1360.9073800 | 1360.9073960 |
|      | -0.0000160 | -0.0003000 | 0.0000000 |   |    |    |    |   |              |              |
| 593: | 25         | 13         | 13        | 1 | 24 | 12 | 12 | 0 | 1361.4268200 | 1361.4269577 |
|      | -0.0001377 | -0.0003000 | 0.0000000 |   |    |    |    |   |              |              |
| 594: | 26         | 13         | 14        | 1 | 25 | 12 | 13 | 0 | 1361.6866700 | 1361.6865252 |
|      | 0.0001448  | -0.0003000 | 0.0000000 |   |    |    |    |   |              |              |
| 595: | 27         | 13         | 15        | 1 | 26 | 12 | 14 | 0 | 1361.9466200 | 1361.9459454 |
|      | 0.0006746  | -0.0003000 | 0.0000000 |   |    |    |    |   |              |              |
| 596: | 28         | 13         | 16        | 1 | 27 | 12 | 15 | 0 | 1362.2056200 | 1362.2052144 |
|      | 0.0004056  | -0.0003000 | 0.0000000 |   |    |    |    |   |              |              |
| 597: | 29         | 13         | 17        | 1 | 28 | 12 | 16 | 0 | 1362.4640300 | 1362.4643282 |
|      | -0.0002982 | -0.0003000 | 0.0000000 |   |    |    |    |   |              |              |
| 598: | 30         | 13         | 18        | 1 | 29 | 12 | 17 | 0 | 1362.7231800 | 1362.7232828 |
|      | -0.0001028 | -0.0003000 | 0.0000000 |   |    |    |    |   |              |              |
| 599: | 31         | 13         | 19        | 1 | 30 | 12 | 18 | 0 | 1362.9819100 | 1362.9820738 |
|      | -0.0001638 | -0.0003000 | 0.0000000 |   |    |    |    |   |              |              |
| 600: | 32         | 13         | 20        | 1 | 31 | 12 | 19 | 0 | 1363.2404600 | 1363.2406971 |
|      | -0.0002371 | -0.0003000 | 0.0000000 |   |    |    |    |   |              |              |
| 601: | 33         | 13         | 21        | 1 | 32 | 12 | 20 | 0 | 1363.4997100 | 1363.4991484 |
|      | 0.0005616  | -0.0003000 | 0.0000000 |   |    |    |    |   |              |              |
| 602: | 35         | 13         | 23        | 1 | 34 | 12 | 22 | 0 | 1364.0154400 | 1364.0155168 |
|      | -0.0000768 | -0.0003000 | 0.0000000 |   |    |    |    |   |              |              |
| 603: | 36         | 13         | 24        | 1 | 35 | 12 | 23 | 0 | 1364.2738400 | 1364.2734249 |
|      | 0.0004151  | -0.0003000 | 0.0000000 |   |    |    |    |   |              |              |
| 604: | 37         | 13         | 25        | 1 | 36 | 12 | 24 | 0 | 1364.5313300 | 1364.5311426 |
|      | 0.0001874  | -0.0003000 | 0.0000000 |   |    |    |    |   |              |              |
| 605: | 38         | 13         | 26        | 1 | 37 | 12 | 25 | 0 | 1364.7884200 | 1364.7886651 |
|      | -0.0002451 | -0.0003000 | 0.0000000 |   |    |    |    |   |              |              |
| 606: | 39         | 13         | 27        | 1 | 38 | 12 | 26 | 0 | 1365.0460000 | 1365.0459877 |
|      | 0.0000123  | -0.0003000 | 0.0000000 |   |    |    |    |   |              |              |
| 607: | 40         | 13         | 28        | 1 | 39 | 12 | 27 | 0 | 1365.3035900 | 1365.3031053 |
|      | 0.0004847  | -0.0003000 | 0.0000000 |   |    |    |    |   |              |              |
| 608: | 41         | 13         | 29        | 1 | 40 | 12 | 28 | 0 | 1365.5600000 | 1365.5600129 |
|      | -0.0000129 | -0.0003000 | 0.0000000 |   |    |    |    |   |              |              |
| 609: | 42         | 13         | 30        | 1 | 41 | 12 | 29 | 0 | 1365.8169700 | 1365.8167054 |
|      | 0.0002646  | -0.0003000 | 0.0000000 |   |    |    |    |   |              |              |
| 610: | 43         | 13         | 31        | 1 | 42 | 12 | 30 | 0 | 1366.0729900 | 1366.0731775 |
|      | -0.0001875 | -0.0003000 | 0.0000000 |   |    |    |    |   |              |              |
| 611: | 44         | 13         | 32        | 1 | 43 | 12 | 31 | 0 | 1366.3298200 | 1366.3294241 |
|      | 0.0003959  | -0.0003000 | 0.0000000 |   |    |    |    |   |              |              |
| 612: | 45         | 13         | 33        | 1 | 44 | 12 | 32 | 0 | 1366.5855000 | 1366.5854396 |
|      | 0.0000604  | -0.0003000 | 0.0000000 |   |    |    |    |   |              |              |
| 613: | 47         | 13         | 35        | 1 | 46 | 12 | 34 | 0 | 1367.0963800 | 1367.0967559 |
|      | -0.0003759 | -0.0003000 | 0.0000000 |   |    |    |    |   |              |              |
| 614: | 48         | 13         | 36        | 1 | 47 | 12 | 35 | 0 | 1367.3519600 | 1367.3520454 |
|      | -0.0000854 | -0.0003000 | 0.0000000 |   |    |    |    |   |              |              |
| 615: | 49         | 13         | 37        | 1 | 48 | 12 | 36 | 0 | 1367.6070000 | 1367.6070817 |

|            |            |           |    |              |              |
|------------|------------|-----------|----|--------------|--------------|
| -0.0000817 | -0.0003000 | 0.0000000 |    |              |              |
| 616:       | 50         | 13        | 38 | 1            | 49 12 37 0   |
| 0.0000612  | -0.0003000 | 0.0000000 |    | 1367.8619200 | 1367.8618588 |
| 617:       | 51         | 13        | 39 | 1            | 50 12 38 0   |
| -0.0005210 | -0.0003000 | 0.0000000 |    | 1368.1158500 | 1368.1163710 |
| 618:       | 52         | 13        | 40 | 1            | 51 12 39 0   |
| 0.0002677  | -0.0003000 | 0.0000000 |    | 1368.3708800 | 1368.3706123 |
| 619:       | 54         | 13        | 42 | 1            | 53 12 41 0   |
| 0.0003418  | -0.0003000 | 0.0000000 |    | 1368.8786000 | 1368.8782582 |
| 620:       | 55         | 13        | 43 | 1            | 54 12 42 0   |
| 0.0002296  | -0.0003000 | 0.0000000 |    | 1369.1318800 | 1369.1316504 |
| 621:       | 15         | 14        | 1  | 1            | 14 13 2 0    |
| 0.0002177  | -0.0003000 | 0.0000000 |    | 1360.9612800 | 1360.9610623 |
| 622:       | 16         | 14        | 2  | 1            | 15 13 3 0    |
| 0.0002092  | -0.0003000 | 0.0000000 |    | 1361.2222500 | 1361.2220408 |
| 623:       | 17         | 14        | 3  | 1            | 16 13 4 0    |
| -0.0002416 | -0.0003000 | 0.0000000 |    | 1361.4826700 | 1361.4829116 |
| 624:       | 18         | 14        | 4  | 1            | 17 13 5 0    |
| -0.0001019 | -0.0003000 | 0.0000000 |    | 1361.7435700 | 1361.7436719 |
| 625:       | 19         | 14        | 5  | 1            | 18 13 6 0    |
| -0.0000988 | -0.0003000 | 0.0000000 |    | 1362.0042200 | 1362.0043188 |
| 626:       | 20         | 14        | 6  | 1            | 19 13 7 0    |
| -0.0000094 | -0.0003000 | 0.0000000 |    | 1362.2648400 | 1362.2648494 |
| 627:       | 21         | 14        | 7  | 1            | 20 13 8 0    |
| 0.0004092  | -0.0003000 | 0.0000000 |    | 1362.5256700 | 1362.5252608 |
| 628:       | 22         | 14        | 8  | 1            | 21 13 9 0    |
| 0.0001502  | -0.0003000 | 0.0000000 |    | 1362.7857000 | 1362.7855498 |
| 629:       | 23         | 14        | 9  | 1            | 22 13 10 0   |
| -0.0000633 | -0.0003000 | 0.0000000 |    | 1363.0456500 | 1363.0457133 |
| 630:       | 24         | 14        | 10 | 1            | 23 13 11 0   |
| -0.0001381 | -0.0003000 | 0.0000000 |    | 1363.3056100 | 1363.3057481 |
| 631:       | 25         | 14        | 11 | 1            | 24 13 12 0   |
| 0.0002791  | -0.0003000 | 0.0000000 |    | 1363.5659300 | 1363.5656509 |
| 632:       | 26         | 14        | 12 | 1            | 25 13 13 0   |
| 0.0000417  | -0.0003000 | 0.0000000 |    | 1363.8254600 | 1363.8254183 |
| 633:       | 27         | 14        | 13 | 1            | 26 13 14 0   |
| 0.0001031  | -0.0003000 | 0.0000000 |    | 1364.0851500 | 1364.0850469 |
| 634:       | 28         | 14        | 14 | 1            | 27 13 15 0   |
| 0.0001468  | -0.0003000 | 0.0000000 |    | 1364.3446800 | 1364.3445332 |
| 635:       | 29         | 14        | 15 | 1            | 28 13 16 0   |
| 0.0000564  | -0.0003000 | 0.0000000 |    | 1364.6039300 | 1364.6038736 |
| 636:       | 30         | 14        | 16 | 1            | 29 13 17 0   |
| -0.0002645 | -0.0003000 | 0.0000000 |    | 1364.8628000 | 1364.8630645 |
| 637:       | 31         | 14        | 17 | 1            | 30 13 18 0   |
| 0.0000278  | -0.0003000 | 0.0000000 |    | 1365.1221300 | 1365.1221022 |
| 638:       | 32         | 14        | 18 | 1            | 31 13 19 0   |
| -0.0003428 | -0.0003000 | 0.0000000 |    | 1365.3806400 | 1365.3809828 |
| 639:       | 33         | 14        | 19 | 1            | 32 13 20 0   |
| -0.0000125 | -0.0003000 | 0.0000000 |    | 1365.6396900 | 1365.6397025 |
| 640:       | 34         | 14        | 20 | 1            | 33 13 21 0   |
| -0.0002674 | -0.0003000 | 0.0000000 |    | 1365.8979900 | 1365.8982574 |
| 641:       | 35         | 14        | 21 | 1            | 34 13 22 0   |
| 0.0003265  | -0.0003000 | 0.0000000 |    | 1366.1569700 | 1366.1566435 |
| 642:       | 36         | 14        | 22 | 1            | 35 13 23 0   |
| 0.0001133  | -0.0003000 | 0.0000000 |    | 1366.4149700 | 1366.4148567 |
| 643:       | 37         | 14        | 23 | 1            | 36 13 24 0   |
| 0.0006871  | -0.0003000 | 0.0000000 |    | 1366.6735800 | 1366.6728929 |
| 644:       | 38         | 14        | 24 | 1            | 37 13 25 0   |
| 0.0001922  | -0.0003000 | 0.0000000 |    | 1366.9309400 | 1366.9307478 |
| 645:       | 40         | 14        | 26 | 1            | 39 13 27 0   |
| 0.0006232  | -0.0003000 | 0.0000000 |    | 1367.4465200 | 1367.4458968 |
| 646:       | 41         | 14        | 27 | 1            | 40 13 28 0   |
| 0.0001779  | -0.0003000 | 0.0000000 |    | 1367.7033600 | 1367.7031821 |
| 647:       | 42         | 14        | 28 | 1            | 41 13 29 0   |
| -0.0000087 | -0.0003000 | 0.0000000 |    | 1367.9602600 | 1367.9602687 |

|            |            |           |    |   |    |    |    |   |              |              |
|------------|------------|-----------|----|---|----|----|----|---|--------------|--------------|
| 648:       | 43         | 14        | 29 | 1 | 42 | 13 | 30 | 0 | 1368.2170400 | 1368.2171521 |
| -0.0001121 | -0.0003000 | 0.0000000 |    |   |    |    |    |   |              |              |
| 649:       | 44         | 14        | 30 | 1 | 43 | 13 | 31 | 0 | 1368.4732000 | 1368.4738275 |
| -0.0006275 | -0.0003000 | 0.0000000 |    |   |    |    |    |   |              |              |
| 650:       | 15         | 14        | 2  | 1 | 14 | 13 | 1  | 0 | 1360.9612800 | 1360.9610623 |
| 0.0002177  | -0.0003000 | 0.0000000 |    |   |    |    |    |   |              |              |
| 651:       | 16         | 14        | 3  | 1 | 15 | 13 | 2  | 0 | 1361.2222500 | 1361.2220408 |
| 0.0002092  | -0.0003000 | 0.0000000 |    |   |    |    |    |   |              |              |
| 652:       | 17         | 14        | 4  | 1 | 16 | 13 | 3  | 0 | 1361.4826700 | 1361.4829116 |
| -0.0002416 | -0.0003000 | 0.0000000 |    |   |    |    |    |   |              |              |
| 653:       | 18         | 14        | 5  | 1 | 17 | 13 | 4  | 0 | 1361.7435700 | 1361.7436719 |
| -0.0001019 | -0.0003000 | 0.0000000 |    |   |    |    |    |   |              |              |
| 654:       | 19         | 14        | 6  | 1 | 18 | 13 | 5  | 0 | 1362.0042200 | 1362.0043188 |
| -0.0000988 | -0.0003000 | 0.0000000 |    |   |    |    |    |   |              |              |
| 655:       | 20         | 14        | 7  | 1 | 19 | 13 | 6  | 0 | 1362.2648400 | 1362.2648494 |
| -0.0000094 | -0.0003000 | 0.0000000 |    |   |    |    |    |   |              |              |
| 656:       | 21         | 14        | 8  | 1 | 20 | 13 | 7  | 0 | 1362.5256700 | 1362.5252608 |
| 0.0004092  | -0.0003000 | 0.0000000 |    |   |    |    |    |   |              |              |
| 657:       | 22         | 14        | 9  | 1 | 21 | 13 | 8  | 0 | 1362.7857000 | 1362.7855498 |
| 0.0001502  | -0.0003000 | 0.0000000 |    |   |    |    |    |   |              |              |
| 658:       | 23         | 14        | 10 | 1 | 22 | 13 | 9  | 0 | 1363.0456500 | 1363.0457133 |
| -0.0000633 | -0.0003000 | 0.0000000 |    |   |    |    |    |   |              |              |
| 659:       | 24         | 14        | 11 | 1 | 23 | 13 | 10 | 0 | 1363.3056100 | 1363.3057481 |
| -0.0001381 | -0.0003000 | 0.0000000 |    |   |    |    |    |   |              |              |
| 660:       | 25         | 14        | 12 | 1 | 24 | 13 | 11 | 0 | 1363.5659300 | 1363.5656509 |
| 0.0002791  | -0.0003000 | 0.0000000 |    |   |    |    |    |   |              |              |
| 661:       | 26         | 14        | 13 | 1 | 25 | 13 | 12 | 0 | 1363.8254600 | 1363.8254183 |
| 0.0000417  | -0.0003000 | 0.0000000 |    |   |    |    |    |   |              |              |
| 662:       | 27         | 14        | 14 | 1 | 26 | 13 | 13 | 0 | 1364.0851500 | 1364.0850469 |
| 0.0001031  | -0.0003000 | 0.0000000 |    |   |    |    |    |   |              |              |
| 663:       | 28         | 14        | 15 | 1 | 27 | 13 | 14 | 0 | 1364.3446800 | 1364.3445332 |
| 0.0001468  | -0.0003000 | 0.0000000 |    |   |    |    |    |   |              |              |
| 664:       | 29         | 14        | 16 | 1 | 28 | 13 | 15 | 0 | 1364.6039300 | 1364.6038736 |
| 0.0000564  | -0.0003000 | 0.0000000 |    |   |    |    |    |   |              |              |
| 665:       | 30         | 14        | 17 | 1 | 29 | 13 | 16 | 0 | 1364.8628000 | 1364.8630645 |
| -0.0002645 | -0.0003000 | 0.0000000 |    |   |    |    |    |   |              |              |
| 666:       | 31         | 14        | 18 | 1 | 30 | 13 | 17 | 0 | 1365.1221300 | 1365.1221022 |
| 0.0000278  | -0.0003000 | 0.0000000 |    |   |    |    |    |   |              |              |
| 667:       | 32         | 14        | 19 | 1 | 31 | 13 | 18 | 0 | 1365.3806400 | 1365.3809828 |
| -0.0003428 | -0.0003000 | 0.0000000 |    |   |    |    |    |   |              |              |
| 668:       | 33         | 14        | 20 | 1 | 32 | 13 | 19 | 0 | 1365.6396900 | 1365.6397025 |
| -0.0000125 | -0.0003000 | 0.0000000 |    |   |    |    |    |   |              |              |
| 669:       | 34         | 14        | 21 | 1 | 33 | 13 | 20 | 0 | 1365.8979900 | 1365.8982574 |
| -0.0002674 | -0.0003000 | 0.0000000 |    |   |    |    |    |   |              |              |
| 670:       | 35         | 14        | 22 | 1 | 34 | 13 | 21 | 0 | 1366.1569700 | 1366.1566435 |
| 0.0003265  | -0.0003000 | 0.0000000 |    |   |    |    |    |   |              |              |
| 671:       | 36         | 14        | 23 | 1 | 35 | 13 | 22 | 0 | 1366.4149700 | 1366.4148567 |
| 0.0001133  | -0.0003000 | 0.0000000 |    |   |    |    |    |   |              |              |
| 672:       | 37         | 14        | 24 | 1 | 36 | 13 | 23 | 0 | 1366.6735800 | 1366.6728929 |
| 0.0006871  | -0.0003000 | 0.0000000 |    |   |    |    |    |   |              |              |
| 673:       | 38         | 14        | 25 | 1 | 37 | 13 | 24 | 0 | 1366.9309400 | 1366.9307478 |
| 0.0001922  | -0.0003000 | 0.0000000 |    |   |    |    |    |   |              |              |
| 674:       | 40         | 14        | 27 | 1 | 39 | 13 | 26 | 0 | 1367.4465200 | 1367.4458968 |
| 0.0006232  | -0.0003000 | 0.0000000 |    |   |    |    |    |   |              |              |
| 675:       | 41         | 14        | 28 | 1 | 40 | 13 | 27 | 0 | 1367.7033600 | 1367.7031821 |
| 0.0001779  | -0.0003000 | 0.0000000 |    |   |    |    |    |   |              |              |
| 676:       | 42         | 14        | 29 | 1 | 41 | 13 | 28 | 0 | 1367.9602600 | 1367.9602687 |
| -0.0000087 | -0.0003000 | 0.0000000 |    |   |    |    |    |   |              |              |
| 677:       | 43         | 14        | 30 | 1 | 42 | 13 | 29 | 0 | 1368.2170400 | 1368.2171521 |
| -0.0001121 | -0.0003000 | 0.0000000 |    |   |    |    |    |   |              |              |
| 678:       | 44         | 14        | 31 | 1 | 43 | 13 | 30 | 0 | 1368.4732000 | 1368.4738275 |
| -0.0006275 | -0.0003000 | 0.0000000 |    |   |    |    |    |   |              |              |
| 679:       | 15         | 15        | 0  | 1 | 14 | 14 | 1  | 0 | 1363.0626000 | 1363.0627253 |
| -0.0001253 | -0.0003000 | 0.0000000 |    |   |    |    |    |   |              |              |
| 680:       | 16         | 15        | 1  | 1 | 15 | 14 | 2  | 0 | 1363.3239000 | 1363.3238372 |

|              |            |           |   |              |
|--------------|------------|-----------|---|--------------|
| 0.0000628    | -0.0003000 | 0.0000000 |   |              |
| 681: 17      | 15         | 2         | 1 | 16 14 3 0    |
| 1363.5847400 |            |           |   | 1363.5848463 |
| -0.0001063   | -0.0003000 | 0.0000000 |   |              |
| 682: 18      | 15         | 3         | 1 | 17 14 4 0    |
| 1363.8455500 |            |           |   | 1363.8457500 |
| -0.0002000   | -0.0003000 | 0.0000000 |   |              |
| 683: 19      | 15         | 4         | 1 | 18 14 5 0    |
| 1364.1069700 |            |           |   | 1364.1065456 |
| 0.0004244    | -0.0003000 | 0.0000000 |   |              |
| 684: 20      | 15         | 5         | 1 | 19 14 6 0    |
| 1364.3673500 |            |           |   | 1364.3672303 |
| 0.0001197    | -0.0003000 | 0.0000000 |   |              |
| 685: 21      | 15         | 6         | 1 | 20 14 7 0    |
| 1364.6278900 |            |           |   | 1364.6278015 |
| 0.0000885    | -0.0003000 | 0.0000000 |   |              |
| 686: 23      | 15         | 8         | 1 | 22 14 9 0    |
| 1365.1486500 |            |           |   | 1365.1485913 |
| 0.0000587    | -0.0003000 | 0.0000000 |   |              |
| 687: 24      | 15         | 9         | 1 | 23 14 10 0   |
| 1365.4087700 |            |           |   | 1365.4088042 |
| -0.0000342   | -0.0003000 | 0.0000000 |   |              |
| 688: 25      | 15         | 10        | 1 | 24 14 11 0   |
| 1365.6688600 |            |           |   | 1365.6688916 |
| -0.0000316   | -0.0003000 | 0.0000000 |   |              |
| 689: 26      | 15         | 11        | 1 | 25 14 12 0   |
| 1365.9286600 |            |           |   | 1365.9288505 |
| -0.0001905   | -0.0003000 | 0.0000000 |   |              |
| 690: 27      | 15         | 12        | 1 | 26 14 13 0   |
| 1366.1890400 |            |           |   | 1366.1886777 |
| 0.0003623    | -0.0003000 | 0.0000000 |   |              |
| 691: 28      | 15         | 13        | 1 | 27 14 14 0   |
| 1366.4479400 |            |           |   | 1366.4483700 |
| -0.0004300   | -0.0003000 | 0.0000000 |   |              |
| 692: 29      | 15         | 14        | 1 | 28 14 15 0   |
| 1366.7079100 |            |           |   | 1366.7079242 |
| -0.0000142   | -0.0003000 | 0.0000000 |   |              |
| 693: 30      | 15         | 15        | 1 | 29 14 16 0   |
| 1366.9672300 |            |           |   | 1366.9673369 |
| -0.0001069   | -0.0003000 | 0.0000000 |   |              |
| 694: 31      | 15         | 16        | 1 | 30 14 17 0   |
| 1367.2269000 |            |           |   | 1367.2266047 |
| 0.0002953    | -0.0003000 | 0.0000000 |   |              |
| 695: 32      | 15         | 17        | 1 | 31 14 18 0   |
| 1367.4854700 |            |           |   | 1367.4857242 |
| -0.0002542   | -0.0003000 | 0.0000000 |   |              |
| 696: 33      | 15         | 18        | 1 | 32 14 19 0   |
| 1367.7446100 |            |           |   | 1367.7446918 |
| -0.0000818   | -0.0003000 | 0.0000000 |   |              |
| 697: 34      | 15         | 19        | 1 | 33 14 20 0   |
| 1368.0034800 |            |           |   | 1368.0035041 |
| -0.0000241   | -0.0003000 | 0.0000000 |   |              |
| 698: 35      | 15         | 20        | 1 | 34 14 21 0   |
| 1368.2620900 |            |           |   | 1368.2621574 |
| -0.0000674   | -0.0003000 | 0.0000000 |   |              |
| 699: 36      | 15         | 21        | 1 | 35 14 22 0   |
| 1368.5207200 |            |           |   | 1368.5206480 |
| 0.0000720    | -0.0003000 | 0.0000000 |   |              |
| 700: 41      | 15         | 26        | 1 | 40 14 27 0   |
| 1369.8103500 |            |           |   | 1369.8105286 |
| -0.0001786   | -0.0003000 | 0.0000000 |   |              |
| 701: 42      | 15         | 27        | 1 | 41 14 28 0   |
| 1370.0674400 |            |           |   | 1370.0679629 |
| -0.0005229   | -0.0003000 | 0.0000000 |   |              |
| 702: 43      | 15         | 28        | 1 | 42 14 29 0   |
| 1370.3252300 |            |           |   | 1370.3252074 |
| 0.0000226    | -0.0003000 | 0.0000000 |   |              |
| 703: 44      | 15         | 29        | 1 | 43 14 30 0   |
| 1370.5826200 |            |           |   | 1370.5822577 |
| 0.0003623    | -0.0003000 | 0.0000000 |   |              |
| 704: 45      | 15         | 30        | 1 | 44 14 31 0   |
| 1370.8386700 |            |           |   | 1370.8391099 |
| -0.0004399   | -0.0003000 | 0.0000000 |   |              |
| 705: 46      | 15         | 31        | 1 | 45 14 32 0   |
| 1371.0954700 |            |           |   | 1371.0957597 |
| -0.0002897   | -0.0003000 | 0.0000000 |   |              |
| 706: 48      | 15         | 33        | 1 | 47 14 34 0   |
| 1371.6081300 |            |           |   | 1371.6084347 |
| -0.0003047   | -0.0003000 | 0.0000000 |   |              |
| 707: 15      | 15         | 1         | 1 | 14 14 0 0    |
| 1363.0626000 |            |           |   | 1363.0627253 |
| -0.0001253   | -0.0003000 | 0.0000000 |   |              |
| 708: 16      | 15         | 2         | 1 | 15 14 1 0    |
| 1363.3239000 |            |           |   | 1363.3238372 |
| 0.0000628    | -0.0003000 | 0.0000000 |   |              |
| 709: 17      | 15         | 3         | 1 | 16 14 2 0    |
| 1363.5847400 |            |           |   | 1363.5848463 |
| -0.0001063   | -0.0003000 | 0.0000000 |   |              |
| 710: 18      | 15         | 4         | 1 | 17 14 3 0    |
| 1363.8455500 |            |           |   | 1363.8457500 |
| -0.0002000   | -0.0003000 | 0.0000000 |   |              |
| 711: 19      | 15         | 5         | 1 | 18 14 4 0    |
| 1364.1069700 |            |           |   | 1364.1065456 |
| 0.0004244    | -0.0003000 | 0.0000000 |   |              |
| 712: 20      | 15         | 6         | 1 | 19 14 5 0    |
| 1364.3673500 |            |           |   | 1364.3672303 |
| 0.0001197    | -0.0003000 | 0.0000000 |   |              |

|            |            |           |    |   |    |    |    |   |              |              |
|------------|------------|-----------|----|---|----|----|----|---|--------------|--------------|
| 713:       | 21         | 15        | 7  | 1 | 20 | 14 | 6  | 0 | 1364.6278900 | 1364.6278015 |
| 0.0000885  | -0.0003000 | 0.0000000 |    |   |    |    |    |   |              |              |
| 714:       | 23         | 15        | 9  | 1 | 22 | 14 | 8  | 0 | 1365.1486500 | 1365.1485913 |
| 0.0000587  | -0.0003000 | 0.0000000 |    |   |    |    |    |   |              |              |
| 715:       | 24         | 15        | 10 | 1 | 23 | 14 | 9  | 0 | 1365.4087700 | 1365.4088042 |
| -0.0000342 | -0.0003000 | 0.0000000 |    |   |    |    |    |   |              |              |
| 716:       | 25         | 15        | 11 | 1 | 24 | 14 | 10 | 0 | 1365.6688600 | 1365.6688916 |
| -0.0000316 | -0.0003000 | 0.0000000 |    |   |    |    |    |   |              |              |
| 717:       | 26         | 15        | 12 | 1 | 25 | 14 | 11 | 0 | 1365.9286600 | 1365.9288505 |
| -0.0001905 | -0.0003000 | 0.0000000 |    |   |    |    |    |   |              |              |
| 718:       | 27         | 15        | 13 | 1 | 26 | 14 | 12 | 0 | 1366.1890400 | 1366.1886777 |
| 0.0003623  | -0.0003000 | 0.0000000 |    |   |    |    |    |   |              |              |
| 719:       | 28         | 15        | 14 | 1 | 27 | 14 | 13 | 0 | 1366.4479400 | 1366.4483700 |
| -0.0004300 | -0.0003000 | 0.0000000 |    |   |    |    |    |   |              |              |
| 720:       | 29         | 15        | 15 | 1 | 28 | 14 | 14 | 0 | 1366.7079100 | 1366.7079242 |
| -0.0000142 | -0.0003000 | 0.0000000 |    |   |    |    |    |   |              |              |
| 721:       | 30         | 15        | 16 | 1 | 29 | 14 | 15 | 0 | 1366.9672300 | 1366.9673369 |
| -0.0001069 | -0.0003000 | 0.0000000 |    |   |    |    |    |   |              |              |
| 722:       | 31         | 15        | 17 | 1 | 30 | 14 | 16 | 0 | 1367.2269000 | 1367.2266047 |
| 0.0002953  | -0.0003000 | 0.0000000 |    |   |    |    |    |   |              |              |
| 723:       | 32         | 15        | 18 | 1 | 31 | 14 | 17 | 0 | 1367.4854700 | 1367.4857242 |
| -0.0002542 | -0.0003000 | 0.0000000 |    |   |    |    |    |   |              |              |
| 724:       | 33         | 15        | 19 | 1 | 32 | 14 | 18 | 0 | 1367.7446100 | 1367.7446918 |
| -0.0000818 | -0.0003000 | 0.0000000 |    |   |    |    |    |   |              |              |
| 725:       | 34         | 15        | 20 | 1 | 33 | 14 | 19 | 0 | 1368.0034800 | 1368.0035041 |
| -0.0000241 | -0.0003000 | 0.0000000 |    |   |    |    |    |   |              |              |
| 726:       | 35         | 15        | 21 | 1 | 34 | 14 | 20 | 0 | 1368.2620900 | 1368.2621574 |
| -0.0000674 | -0.0003000 | 0.0000000 |    |   |    |    |    |   |              |              |
| 727:       | 36         | 15        | 22 | 1 | 35 | 14 | 21 | 0 | 1368.5207200 | 1368.5206480 |
| 0.0000720  | -0.0003000 | 0.0000000 |    |   |    |    |    |   |              |              |
| 728:       | 41         | 15        | 27 | 1 | 40 | 14 | 26 | 0 | 1369.8103500 | 1369.8105286 |
| -0.0001786 | -0.0003000 | 0.0000000 |    |   |    |    |    |   |              |              |
| 729:       | 42         | 15        | 28 | 1 | 41 | 14 | 27 | 0 | 1370.0674400 | 1370.0679629 |
| -0.0005229 | -0.0003000 | 0.0000000 |    |   |    |    |    |   |              |              |
| 730:       | 43         | 15        | 29 | 1 | 42 | 14 | 28 | 0 | 1370.3252300 | 1370.3252074 |
| 0.0000226  | -0.0003000 | 0.0000000 |    |   |    |    |    |   |              |              |
| 731:       | 44         | 15        | 30 | 1 | 43 | 14 | 29 | 0 | 1370.5826200 | 1370.5822577 |
| 0.0003623  | -0.0003000 | 0.0000000 |    |   |    |    |    |   |              |              |
| 732:       | 45         | 15        | 31 | 1 | 44 | 14 | 30 | 0 | 1370.8386700 | 1370.8391099 |
| -0.0004399 | -0.0003000 | 0.0000000 |    |   |    |    |    |   |              |              |
| 733:       | 46         | 15        | 32 | 1 | 45 | 14 | 31 | 0 | 1371.0954700 | 1371.0957597 |
| -0.0002897 | -0.0003000 | 0.0000000 |    |   |    |    |    |   |              |              |
| 734:       | 48         | 15        | 34 | 1 | 47 | 14 | 33 | 0 | 1371.6081300 | 1371.6084347 |
| -0.0003047 | -0.0003000 | 0.0000000 |    |   |    |    |    |   |              |              |
| 735:       | 16         | 16        | 0  | 1 | 15 | 15 | 1  | 0 | 1365.3899200 | 1365.3895784 |
| 0.0003416  | -0.0003000 | 0.0000000 |    |   |    |    |    |   |              |              |
| 736:       | 17         | 16        | 1  | 1 | 16 | 15 | 2  | 0 | 1365.6503700 | 1365.6507255 |
| -0.0003555 | -0.0003000 | 0.0000000 |    |   |    |    |    |   |              |              |
| 737:       | 18         | 16        | 2  | 1 | 17 | 15 | 3  | 0 | 1365.9117200 | 1365.9117719 |
| -0.0000519 | -0.0003000 | 0.0000000 |    |   |    |    |    |   |              |              |
| 738:       | 19         | 16        | 3  | 1 | 18 | 15 | 4  | 0 | 1366.1729400 | 1366.1727150 |
| 0.0002250  | -0.0003000 | 0.0000000 |    |   |    |    |    |   |              |              |
| 739:       | 20         | 16        | 4  | 1 | 19 | 15 | 5  | 0 | 1366.4338600 | 1366.4335521 |
| 0.0003079  | -0.0003000 | 0.0000000 |    |   |    |    |    |   |              |              |
| 740:       | 22         | 16        | 6  | 1 | 21 | 15 | 7  | 0 | 1366.9547700 | 1366.9548979 |
| -0.0001279 | -0.0003000 | 0.0000000 |    |   |    |    |    |   |              |              |
| 741:       | 23         | 16        | 7  | 1 | 22 | 15 | 8  | 0 | 1367.2155600 | 1367.2154011 |
| 0.0001589  | -0.0003000 | 0.0000000 |    |   |    |    |    |   |              |              |
| 742:       | 24         | 16        | 8  | 1 | 23 | 15 | 9  | 0 | 1367.4762300 | 1367.4757875 |
| 0.0004425  | -0.0003000 | 0.0000000 |    |   |    |    |    |   |              |              |
| 743:       | 25         | 16        | 9  | 1 | 24 | 15 | 10 | 0 | 1367.7354500 | 1367.7360542 |
| -0.0006042 | -0.0003000 | 0.0000000 |    |   |    |    |    |   |              |              |
| 744:       | 26         | 16        | 10 | 1 | 25 | 15 | 11 | 0 | 1367.9959300 | 1367.9961983 |
| -0.0002683 | -0.0003000 | 0.0000000 |    |   |    |    |    |   |              |              |
| 745:       | 27         | 16        | 11 | 1 | 26 | 15 | 12 | 0 | 1368.2562100 | 1368.2562168 |

|            |            |           |              |              |
|------------|------------|-----------|--------------|--------------|
| -0.0000068 | -0.0003000 | 0.0000000 |              |              |
| 746:       | 28         | 16        | 12           | 1 27 15 13 0 |
| 0.0003332  | -0.0003000 | 0.0000000 | 1368.5164400 | 1368.5161068 |
| 747:       | 29         | 16        | 13           | 1 28 15 14 0 |
| 0.0005248  | -0.0003000 | 0.0000000 | 1368.7763900 | 1368.7758652 |
| 748:       | 30         | 16        | 14           | 1 29 15 15 0 |
| 0.0003110  | -0.0003000 | 0.0000000 | 1369.0358000 | 1369.0354890 |
| 749:       | 31         | 16        | 15           | 1 30 15 16 0 |
| 0.0000251  | -0.0003000 | 0.0000000 | 1369.2950000 | 1369.2949749 |
| 750:       | 33         | 16        | 17           | 1 32 15 18 0 |
| -0.0000105 | -0.0003000 | 0.0000000 | 1369.8135100 | 1369.8135205 |
| 751:       | 35         | 16        | 19           | 1 34 15 20 0 |
| 0.0006441  | -0.0003000 | 0.0000000 | 1370.3321200 | 1370.3314759 |
| 752:       | 37         | 16        | 21           | 1 36 15 22 0 |
| -0.0002543 | -0.0003000 | 0.0000000 | 1370.8485600 | 1370.8488143 |
| 753:       | 38         | 16        | 22           | 1 37 15 23 0 |
| 0.0003865  | -0.0003000 | 0.0000000 | 1371.1076300 | 1371.1072435 |
| 754:       | 39         | 16        | 23           | 1 38 15 24 0 |
| 0.0002119  | -0.0003000 | 0.0000000 | 1371.3657200 | 1371.3655081 |
| 755:       | 40         | 16        | 24           | 1 39 15 25 0 |
| 0.0006955  | -0.0003000 | 0.0000000 | 1371.6243000 | 1371.6236045 |
| 756:       | 41         | 16        | 25           | 1 40 15 26 0 |
| 0.0001610  | -0.0003000 | 0.0000000 | 1371.8816900 | 1371.8815290 |
| 757:       | 44         | 16        | 28           | 1 43 15 29 0 |
| 0.0003051  | -0.0003000 | 0.0000000 | 1372.6545400 | 1372.6542349 |
| 758:       | 45         | 16        | 29           | 1 44 15 30 0 |
| 0.0005848  | -0.0003000 | 0.0000000 | 1372.9120200 | 1372.9114352 |
| 759:       | 46         | 16        | 30           | 1 45 15 31 0 |
| -0.0001349 | -0.0003000 | 0.0000000 | 1373.1683100 | 1373.1684449 |
| 760:       | 47         | 16        | 31           | 1 46 15 32 0 |
| 0.0004998  | -0.0003000 | 0.0000000 | 1373.4257600 | 1373.4252602 |
| 761:       | 49         | 16        | 33           | 1 48 15 34 0 |
| -0.0004317 | -0.0003000 | 0.0000000 | 1373.9378600 | 1373.9382917 |
| 762:       | 16         | 16        | 1            | 1 15 15 0 0  |
| 0.0003416  | -0.0003000 | 0.0000000 | 1365.3899200 | 1365.3895784 |
| 763:       | 17         | 16        | 2            | 1 16 15 1 0  |
| -0.0003555 | -0.0003000 | 0.0000000 | 1365.6503700 | 1365.6507255 |
| 764:       | 18         | 16        | 3            | 1 17 15 2 0  |
| -0.0000519 | -0.0003000 | 0.0000000 | 1365.9117200 | 1365.9117719 |
| 765:       | 19         | 16        | 4            | 1 18 15 3 0  |
| 0.0002250  | -0.0003000 | 0.0000000 | 1366.1729400 | 1366.1727150 |
| 766:       | 20         | 16        | 5            | 1 19 15 4 0  |
| 0.0003079  | -0.0003000 | 0.0000000 | 1366.4338600 | 1366.4335521 |
| 767:       | 22         | 16        | 7            | 1 21 15 6 0  |
| -0.0001279 | -0.0003000 | 0.0000000 | 1366.9547700 | 1366.9548979 |
| 768:       | 23         | 16        | 8            | 1 22 15 7 0  |
| 0.0001589  | -0.0003000 | 0.0000000 | 1367.2155600 | 1367.2154011 |
| 769:       | 24         | 16        | 9            | 1 23 15 8 0  |
| 0.0004425  | -0.0003000 | 0.0000000 | 1367.4762300 | 1367.4757875 |
| 770:       | 25         | 16        | 10           | 1 24 15 9 0  |
| -0.0006042 | -0.0003000 | 0.0000000 | 1367.7354500 | 1367.7360542 |
| 771:       | 26         | 16        | 11           | 1 25 15 10 0 |
| -0.0002683 | -0.0003000 | 0.0000000 | 1367.9959300 | 1367.9961983 |
| 772:       | 27         | 16        | 12           | 1 26 15 11 0 |
| -0.0000068 | -0.0003000 | 0.0000000 | 1368.2562100 | 1368.2562168 |
| 773:       | 28         | 16        | 13           | 1 27 15 12 0 |
| 0.0003332  | -0.0003000 | 0.0000000 | 1368.5164400 | 1368.5161068 |
| 774:       | 29         | 16        | 14           | 1 28 15 13 0 |
| 0.0005248  | -0.0003000 | 0.0000000 | 1368.7763900 | 1368.7758652 |
| 775:       | 30         | 16        | 15           | 1 29 15 14 0 |
| 0.0003110  | -0.0003000 | 0.0000000 | 1369.0358000 | 1369.0354890 |
| 776:       | 31         | 16        | 16           | 1 30 15 15 0 |
| 0.0000251  | -0.0003000 | 0.0000000 | 1369.2950000 | 1369.2949749 |
| 777:       | 33         | 16        | 18           | 1 32 15 17 0 |
| -0.0000105 | -0.0003000 | 0.0000000 | 1369.8135100 | 1369.8135205 |

|            |            |           |    |   |    |    |    |   |              |              |
|------------|------------|-----------|----|---|----|----|----|---|--------------|--------------|
| 778:       | 35         | 16        | 20 | 1 | 34 | 15 | 19 | 0 | 1370.3321200 | 1370.3314759 |
| 0.0006441  | -0.0003000 | 0.0000000 |    |   |    |    |    |   |              |              |
| 779:       | 37         | 16        | 22 | 1 | 36 | 15 | 21 | 0 | 1370.8485600 | 1370.8488143 |
| -0.0002543 | -0.0003000 | 0.0000000 |    |   |    |    |    |   |              |              |
| 780:       | 38         | 16        | 23 | 1 | 37 | 15 | 22 | 0 | 1371.1076300 | 1371.1072435 |
| 0.0003865  | -0.0003000 | 0.0000000 |    |   |    |    |    |   |              |              |
| 781:       | 39         | 16        | 24 | 1 | 38 | 15 | 23 | 0 | 1371.3657200 | 1371.3655081 |
| 0.0002119  | -0.0003000 | 0.0000000 |    |   |    |    |    |   |              |              |
| 782:       | 40         | 16        | 25 | 1 | 39 | 15 | 24 | 0 | 1371.6243000 | 1371.6236045 |
| 0.0006955  | -0.0003000 | 0.0000000 |    |   |    |    |    |   |              |              |
| 783:       | 41         | 16        | 26 | 1 | 40 | 15 | 25 | 0 | 1371.8816900 | 1371.8815290 |
| 0.0001610  | -0.0003000 | 0.0000000 |    |   |    |    |    |   |              |              |
| 784:       | 44         | 16        | 29 | 1 | 43 | 15 | 28 | 0 | 1372.6545400 | 1372.6542349 |
| 0.0003051  | -0.0003000 | 0.0000000 |    |   |    |    |    |   |              |              |
| 785:       | 45         | 16        | 30 | 1 | 44 | 15 | 29 | 0 | 1372.9120200 | 1372.9114352 |
| 0.0005848  | -0.0003000 | 0.0000000 |    |   |    |    |    |   |              |              |
| 786:       | 46         | 16        | 31 | 1 | 45 | 15 | 30 | 0 | 1373.1683100 | 1373.1684449 |
| -0.0001349 | -0.0003000 | 0.0000000 |    |   |    |    |    |   |              |              |
| 787:       | 47         | 16        | 32 | 1 | 46 | 15 | 31 | 0 | 1373.4257600 | 1373.4252602 |
| 0.0004998  | -0.0003000 | 0.0000000 |    |   |    |    |    |   |              |              |
| 788:       | 49         | 16        | 34 | 1 | 48 | 15 | 33 | 0 | 1373.9378600 | 1373.9382917 |
| -0.0004317 | -0.0003000 | 0.0000000 |    |   |    |    |    |   |              |              |
| 789:       | 17         | 17        | 0  | 1 | 16 | 16 | 1  | 0 | 1367.6797700 | 1367.6799807 |
| -0.0002107 | -0.0003000 | 0.0000000 |    |   |    |    |    |   |              |              |
| 790:       | 18         | 17        | 1  | 1 | 17 | 16 | 2  | 0 | 1367.9406700 | 1367.9411690 |
| -0.0004990 | -0.0003000 | 0.0000000 |    |   |    |    |    |   |              |              |
| 791:       | 20         | 17        | 3  | 1 | 19 | 16 | 4  | 0 | 1368.4633100 | 1368.4632462 |
| 0.0000638  | -0.0003000 | 0.0000000 |    |   |    |    |    |   |              |              |
| 792:       | 21         | 17        | 4  | 1 | 20 | 16 | 5  | 0 | 1368.7237100 | 1368.7241300 |
| -0.0004200 | -0.0003000 | 0.0000000 |    |   |    |    |    |   |              |              |
| 793:       | 23         | 17        | 6  | 1 | 22 | 16 | 7  | 0 | 1369.2453100 | 1369.2455752 |
| -0.0002652 | -0.0003000 | 0.0000000 |    |   |    |    |    |   |              |              |
| 794:       | 24         | 17        | 7  | 1 | 23 | 16 | 8  | 0 | 1369.5060200 | 1369.5061313 |
| -0.0001113 | -0.0003000 | 0.0000000 |    |   |    |    |    |   |              |              |
| 795:       | 25         | 17        | 8  | 1 | 24 | 16 | 9  | 0 | 1369.7665300 | 1369.7665727 |
| -0.0000427 | -0.0003000 | 0.0000000 |    |   |    |    |    |   |              |              |
| 796:       | 26         | 17        | 9  | 1 | 25 | 16 | 10 | 0 | 1370.0266800 | 1370.0268968 |
| -0.0002168 | -0.0003000 | 0.0000000 |    |   |    |    |    |   |              |              |
| 797:       | 27         | 17        | 10 | 1 | 26 | 16 | 11 | 0 | 1370.2873500 | 1370.2871007 |
| 0.0002493  | -0.0003000 | 0.0000000 |    |   |    |    |    |   |              |              |
| 798:       | 28         | 17        | 11 | 1 | 27 | 16 | 12 | 0 | 1370.5469500 | 1370.5471816 |
| -0.0002316 | -0.0003000 | 0.0000000 |    |   |    |    |    |   |              |              |
| 799:       | 29         | 17        | 12 | 1 | 28 | 16 | 13 | 0 | 1370.8065100 | 1370.8071367 |
| -0.0006267 | -0.0003000 | 0.0000000 |    |   |    |    |    |   |              |              |
| 800:       | 30         | 17        | 13 | 1 | 29 | 16 | 14 | 0 | 1371.0670700 | 1371.0669630 |
| 0.0001070  | -0.0003000 | 0.0000000 |    |   |    |    |    |   |              |              |
| 801:       | 31         | 17        | 14 | 1 | 30 | 16 | 15 | 0 | 1371.3273400 | 1371.3266575 |
| 0.0006825  | -0.0003000 | 0.0000000 |    |   |    |    |    |   |              |              |
| 802:       | 33         | 17        | 16 | 1 | 32 | 16 | 17 | 0 | 1371.8460300 | 1371.8456393 |
| 0.0003907  | -0.0003000 | 0.0000000 |    |   |    |    |    |   |              |              |
| 803:       | 34         | 17        | 17 | 1 | 33 | 16 | 18 | 0 | 1372.1050500 | 1372.1049205 |
| 0.0001295  | -0.0003000 | 0.0000000 |    |   |    |    |    |   |              |              |
| 804:       | 35         | 17        | 18 | 1 | 34 | 16 | 19 | 0 | 1372.3639400 | 1372.3640577 |
| -0.0001177 | -0.0003000 | 0.0000000 |    |   |    |    |    |   |              |              |
| 805:       | 36         | 17        | 19 | 1 | 35 | 16 | 20 | 0 | 1372.6224400 | 1372.6230477 |
| -0.0006077 | -0.0003000 | 0.0000000 |    |   |    |    |    |   |              |              |
| 806:       | 37         | 17        | 20 | 1 | 36 | 16 | 21 | 0 | 1372.8821600 | 1372.8818875 |
| 0.0002725  | -0.0003000 | 0.0000000 |    |   |    |    |    |   |              |              |
| 807:       | 38         | 17        | 21 | 1 | 37 | 16 | 22 | 0 | 1373.1411300 | 1373.1405737 |
| 0.0005563  | -0.0003000 | 0.0000000 |    |   |    |    |    |   |              |              |
| 808:       | 39         | 17        | 22 | 1 | 38 | 16 | 23 | 0 | 1373.3992600 | 1373.3991031 |
| 0.0001569  | -0.0003000 | 0.0000000 |    |   |    |    |    |   |              |              |
| 809:       | 41         | 17        | 24 | 1 | 40 | 16 | 25 | 0 | 1373.9151800 | 1373.9156781 |
| -0.0004981 | -0.0003000 | 0.0000000 |    |   |    |    |    |   |              |              |
| 810:       | 42         | 17        | 25 | 1 | 41 | 16 | 26 | 0 | 1374.1741700 | 1374.1737169 |

|            |            |           |   |    |    |    |   |              |              |  |
|------------|------------|-----------|---|----|----|----|---|--------------|--------------|--|
| 0.0004531  | -0.0003000 | 0.0000000 |   |    |    |    |   |              |              |  |
| 811: 43    | 17         | 26        | 1 | 42 | 16 | 27 | 0 |              |              |  |
| -0.0000555 | -0.0003000 | 0.0000000 |   |    |    |    |   | 1374.4315300 | 1374.4315855 |  |
| 812: 46    | 17         | 29        | 1 | 45 | 16 | 30 | 0 |              |              |  |
| 0.0007354  | -0.0003000 | 0.0000000 |   |    |    |    |   | 1375.2048700 | 1375.2041346 |  |
| 813: 47    | 17         | 30        | 1 | 46 | 16 | 31 | 0 |              |              |  |
| 0.0005031  | -0.0003000 | 0.0000000 |   |    |    |    |   | 1375.4617900 | 1375.4612869 |  |
| 814: 48    | 17         | 31        | 1 | 47 | 16 | 32 | 0 |              |              |  |
| -0.0003912 | -0.0003000 | 0.0000000 |   |    |    |    |   | 1375.7178600 | 1375.7182512 |  |
| 815: 49    | 17         | 32        | 1 | 48 | 16 | 33 | 0 |              |              |  |
| -0.0001539 | -0.0003000 | 0.0000000 |   |    |    |    |   | 1375.9748700 | 1375.9750239 |  |
| 816: 17    | 17         | 1         | 1 | 16 | 16 | 0  | 0 |              |              |  |
| -0.0002107 | -0.0003000 | 0.0000000 |   |    |    |    |   | 1367.6797700 | 1367.6799807 |  |
| 817: 18    | 17         | 2         | 1 | 17 | 16 | 1  | 0 |              |              |  |
| -0.0004990 | -0.0003000 | 0.0000000 |   |    |    |    |   | 1367.9406700 | 1367.9411690 |  |
| 818: 20    | 17         | 4         | 1 | 19 | 16 | 3  | 0 |              |              |  |
| 0.0000638  | -0.0003000 | 0.0000000 |   |    |    |    |   | 1368.4633100 | 1368.4632462 |  |
| 819: 21    | 17         | 5         | 1 | 20 | 16 | 4  | 0 |              |              |  |
| -0.0004200 | -0.0003000 | 0.0000000 |   |    |    |    |   | 1368.7237100 | 1368.7241300 |  |
| 820: 23    | 17         | 7         | 1 | 22 | 16 | 6  | 0 |              |              |  |
| -0.0002652 | -0.0003000 | 0.0000000 |   |    |    |    |   | 1369.2453100 | 1369.2455752 |  |
| 821: 24    | 17         | 8         | 1 | 23 | 16 | 7  | 0 |              |              |  |
| -0.0001113 | -0.0003000 | 0.0000000 |   |    |    |    |   | 1369.5060200 | 1369.5061313 |  |
| 822: 25    | 17         | 9         | 1 | 24 | 16 | 8  | 0 |              |              |  |
| -0.0000427 | -0.0003000 | 0.0000000 |   |    |    |    |   | 1369.7665300 | 1369.7665727 |  |
| 823: 26    | 17         | 10        | 1 | 25 | 16 | 9  | 0 |              |              |  |
| -0.0002168 | -0.0003000 | 0.0000000 |   |    |    |    |   | 1370.0266800 | 1370.0268968 |  |
| 824: 27    | 17         | 11        | 1 | 26 | 16 | 10 | 0 |              |              |  |
| 0.0002493  | -0.0003000 | 0.0000000 |   |    |    |    |   | 1370.2873500 | 1370.2871007 |  |
| 825: 28    | 17         | 12        | 1 | 27 | 16 | 11 | 0 |              |              |  |
| -0.0002316 | -0.0003000 | 0.0000000 |   |    |    |    |   | 1370.5469500 | 1370.5471816 |  |
| 826: 29    | 17         | 13        | 1 | 28 | 16 | 12 | 0 |              |              |  |
| -0.0006267 | -0.0003000 | 0.0000000 |   |    |    |    |   | 1370.8065100 | 1370.8071367 |  |
| 827: 30    | 17         | 14        | 1 | 29 | 16 | 13 | 0 |              |              |  |
| 0.0001070  | -0.0003000 | 0.0000000 |   |    |    |    |   | 1371.0670700 | 1371.0669630 |  |
| 828: 31    | 17         | 15        | 1 | 30 | 16 | 14 | 0 |              |              |  |
| 0.0006825  | -0.0003000 | 0.0000000 |   |    |    |    |   | 1371.3273400 | 1371.3266575 |  |
| 829: 33    | 17         | 17        | 1 | 32 | 16 | 16 | 0 |              |              |  |
| 0.0003907  | -0.0003000 | 0.0000000 |   |    |    |    |   | 1371.8460300 | 1371.8456393 |  |
| 830: 34    | 17         | 18        | 1 | 33 | 16 | 17 | 0 |              |              |  |
| 0.0001295  | -0.0003000 | 0.0000000 |   |    |    |    |   | 1372.1050500 | 1372.1049205 |  |
| 831: 35    | 17         | 19        | 1 | 34 | 16 | 18 | 0 |              |              |  |
| -0.0001177 | -0.0003000 | 0.0000000 |   |    |    |    |   | 1372.3639400 | 1372.3640577 |  |
| 832: 36    | 17         | 20        | 1 | 35 | 16 | 19 | 0 |              |              |  |
| -0.0006077 | -0.0003000 | 0.0000000 |   |    |    |    |   | 1372.6224400 | 1372.6230477 |  |
| 833: 37    | 17         | 21        | 1 | 36 | 16 | 20 | 0 |              |              |  |
| 0.0002725  | -0.0003000 | 0.0000000 |   |    |    |    |   | 1372.8821600 | 1372.8818875 |  |
| 834: 38    | 17         | 22        | 1 | 37 | 16 | 21 | 0 |              |              |  |
| 0.0005563  | -0.0003000 | 0.0000000 |   |    |    |    |   | 1373.1411300 | 1373.1405737 |  |
| 835: 39    | 17         | 23        | 1 | 38 | 16 | 22 | 0 |              |              |  |
| 0.0001569  | -0.0003000 | 0.0000000 |   |    |    |    |   | 1373.3992600 | 1373.3991031 |  |
| 836: 41    | 17         | 25        | 1 | 40 | 16 | 24 | 0 |              |              |  |
| -0.0004981 | -0.0003000 | 0.0000000 |   |    |    |    |   | 1373.9151800 | 1373.9156781 |  |
| 837: 42    | 17         | 26        | 1 | 41 | 16 | 25 | 0 |              |              |  |
| 0.0004531  | -0.0003000 | 0.0000000 |   |    |    |    |   | 1374.1741700 | 1374.1737169 |  |
| 838: 43    | 17         | 27        | 1 | 42 | 16 | 26 | 0 |              |              |  |
| -0.0000555 | -0.0003000 | 0.0000000 |   |    |    |    |   | 1374.4315300 | 1374.4315855 |  |
| 839: 46    | 17         | 30        | 1 | 45 | 16 | 29 | 0 |              |              |  |
| 0.0007354  | -0.0003000 | 0.0000000 |   |    |    |    |   | 1375.2048700 | 1375.2041346 |  |
| 840: 47    | 17         | 31        | 1 | 46 | 16 | 30 | 0 |              |              |  |
| 0.0005031  | -0.0003000 | 0.0000000 |   |    |    |    |   | 1375.4617900 | 1375.4612869 |  |
| 841: 48    | 17         | 32        | 1 | 47 | 16 | 31 | 0 |              |              |  |
| -0.0003912 | -0.0003000 | 0.0000000 |   |    |    |    |   | 1375.7178600 | 1375.7182512 |  |
| 842: 49    | 17         | 33        | 1 | 48 | 16 | 32 | 0 |              |              |  |
| -0.0001539 | -0.0003000 | 0.0000000 |   |    |    |    |   | 1375.9748700 | 1375.9750239 |  |

|                                 |              |              |
|---------------------------------|--------------|--------------|
| 843: 18 18 0 1 17 17 1 0        | 1369.9327200 | 1369.9334340 |
| -0.0007140 -0.0003000 0.0000000 |              |              |
| 844: 19 18 1 1 18 17 2 0        | 1370.1940500 | 1370.1946682 |
| -0.0006182 -0.0003000 0.0000000 |              |              |
| 845: 21 18 3 1 20 17 4 0        | 1370.7159100 | 1370.7168418 |
| -0.0009318 -0.0003000 0.0000000 |              |              |
| 846: 22 18 4 1 21 17 5 0        | 1370.9777200 | 1370.9777763 |
| -0.0000563 -0.0003000 0.0000000 |              |              |
| 847: 23 18 5 1 22 17 6 0        | 1371.2386700 | 1371.2386060 |
| 0.0000640 -0.0003000 0.0000000  |              |              |
| 848: 24 18 6 1 23 17 7 0        | 1371.4987900 | 1371.4993281 |
| -0.0005381 -0.0003000 0.0000000 |              |              |
| 849: 25 18 7 1 24 17 8 0        | 1371.7595000 | 1371.7599402 |
| -0.0004402 -0.0003000 0.0000000 |              |              |
| 850: 26 18 8 1 25 17 9 0        | 1372.0204800 | 1372.0204395 |
| 0.0000405 -0.0003000 0.0000000  |              |              |
| 851: 27 18 9 1 26 17 10 0       | 1372.2805600 | 1372.2808235 |
| -0.0002635 -0.0003000 0.0000000 |              |              |
| 852: 28 18 10 1 27 17 11 0      | 1372.5403700 | 1372.5410894 |
| -0.0007194 -0.0003000 0.0000000 |              |              |
| 853: 29 18 11 1 28 17 12 0      | 1372.8007900 | 1372.8012344 |
| -0.0004444 -0.0003000 0.0000000 |              |              |
| 854: 30 18 12 1 29 17 13 0      | 1373.0614700 | 1373.0612559 |
| 0.0002141 -0.0003000 0.0000000  |              |              |
| 855: 32 18 14 1 31 17 15 0      | 1373.5814600 | 1373.5809166 |
| 0.0005434 -0.0003000 0.0000000  |              |              |
| 856: 33 18 15 1 32 17 16 0      | 1373.8410300 | 1373.8405502 |
| 0.0004798 -0.0003000 0.0000000  |              |              |
| 857: 34 18 16 1 33 17 17 0      | 1374.1005400 | 1374.1000486 |
| 0.0004914 -0.0003000 0.0000000  |              |              |
| 858: 35 18 17 1 34 17 18 0      | 1374.3592900 | 1374.3594091 |
| -0.0001191 -0.0003000 0.0000000 |              |              |
| 859: 38 18 20 1 37 17 21 0      | 1375.1368000 | 1375.1366323 |
| 0.0001677 -0.0003000 0.0000000  |              |              |
| 860: 39 18 21 1 38 17 22 0      | 1375.3953900 | 1375.3954105 |
| -0.0000205 -0.0003000 0.0000000 |              |              |
| 861: 40 18 22 1 39 17 23 0      | 1375.6540200 | 1375.6540354 |
| -0.0000154 -0.0003000 0.0000000 |              |              |
| 862: 42 18 24 1 41 17 25 0      | 1376.1709700 | 1376.1708127 |
| 0.0001573 -0.0003000 0.0000000  |              |              |
| 863: 43 18 25 1 42 17 26 0      | 1376.4291800 | 1376.4289587 |
| 0.0002213 -0.0003000 0.0000000  |              |              |
| 864: 44 18 26 1 43 17 27 0      | 1376.6865700 | 1376.6869386 |
| -0.0003686 -0.0003000 0.0000000 |              |              |
| 865: 46 18 28 1 45 17 29 0      | 1377.2021100 | 1377.2023871 |
| -0.0002771 -0.0003000 0.0000000 |              |              |
| 866: 48 18 30 1 47 17 31 0      | 1377.7170500 | 1377.7171314 |
| -0.0000814 -0.0003000 0.0000000 |              |              |
| 867: 49 18 31 1 48 17 32 0      | 1377.9741100 | 1377.9742310 |
| -0.0001210 -0.0003000 0.0000000 |              |              |
| 868: 51 18 33 1 50 17 34 0      | 1378.4875600 | 1378.4878681 |
| -0.0003081 -0.0003000 0.0000000 |              |              |
| 869: 18 18 1 1 17 17 0 0        | 1369.9327200 | 1369.9334340 |
| -0.0007140 -0.0003000 0.0000000 |              |              |
| 870: 19 18 2 1 18 17 1 0        | 1370.1940500 | 1370.1946682 |
| -0.0006182 -0.0003000 0.0000000 |              |              |
| 871: 21 18 4 1 20 17 3 0        | 1370.7159100 | 1370.7168418 |
| -0.0009318 -0.0003000 0.0000000 |              |              |
| 872: 22 18 5 1 21 17 4 0        | 1370.9777200 | 1370.9777763 |
| -0.0000563 -0.0003000 0.0000000 |              |              |
| 873: 23 18 6 1 22 17 5 0        | 1371.2386700 | 1371.2386060 |
| 0.0000640 -0.0003000 0.0000000  |              |              |
| 874: 24 18 7 1 23 17 6 0        | 1371.4987900 | 1371.4993281 |
| -0.0005381 -0.0003000 0.0000000 |              |              |
| 875: 25 18 8 1 24 17 7 0        | 1371.7595000 | 1371.7599402 |

|            |            |           |   |              |              |
|------------|------------|-----------|---|--------------|--------------|
| -0.0004402 | -0.0003000 | 0.0000000 |   |              |              |
| 876: 26    | 18         | 9         | 1 | 25           | 17 8 0       |
| 0.0000405  | -0.0003000 | 0.0000000 |   | 1372.0204800 | 1372.0204395 |
| 877: 27    | 18         | 10        | 1 | 26           | 17 9 0       |
| -0.0002635 | -0.0003000 | 0.0000000 |   | 1372.2805600 | 1372.2808235 |
| 878: 28    | 18         | 11        | 1 | 27           | 17 10 0      |
| -0.0007194 | -0.0003000 | 0.0000000 |   | 1372.5403700 | 1372.5410894 |
| 879: 29    | 18         | 12        | 1 | 28           | 17 11 0      |
| -0.0004444 | -0.0003000 | 0.0000000 |   | 1372.8007900 | 1372.8012344 |
| 880: 30    | 18         | 13        | 1 | 29           | 17 12 0      |
| 0.0002141  | -0.0003000 | 0.0000000 |   | 1373.0614700 | 1373.0612559 |
| 881: 32    | 18         | 15        | 1 | 31           | 17 14 0      |
| 0.0005434  | -0.0003000 | 0.0000000 |   | 1373.5814600 | 1373.5809166 |
| 882: 33    | 18         | 16        | 1 | 32           | 17 15 0      |
| 0.0004798  | -0.0003000 | 0.0000000 |   | 1373.8410300 | 1373.8405502 |
| 883: 34    | 18         | 17        | 1 | 33           | 17 16 0      |
| 0.0004914  | -0.0003000 | 0.0000000 |   | 1374.1005400 | 1374.1000486 |
| 884: 35    | 18         | 18        | 1 | 34           | 17 17 0      |
| -0.0001191 | -0.0003000 | 0.0000000 |   | 1374.3592900 | 1374.3594091 |
| 885: 38    | 18         | 21        | 1 | 37           | 17 20 0      |
| 0.0001677  | -0.0003000 | 0.0000000 |   | 1375.1368000 | 1375.1366323 |
| 886: 39    | 18         | 22        | 1 | 38           | 17 21 0      |
| -0.0000205 | -0.0003000 | 0.0000000 |   | 1375.3953900 | 1375.3954105 |
| 887: 40    | 18         | 23        | 1 | 39           | 17 22 0      |
| -0.0000154 | -0.0003000 | 0.0000000 |   | 1375.6540200 | 1375.6540354 |
| 888: 42    | 18         | 25        | 1 | 41           | 17 24 0      |
| 0.0001573  | -0.0003000 | 0.0000000 |   | 1376.1709700 | 1376.1708127 |
| 889: 43    | 18         | 26        | 1 | 42           | 17 25 0      |
| 0.0002213  | -0.0003000 | 0.0000000 |   | 1376.4291800 | 1376.4289587 |
| 890: 44    | 18         | 27        | 1 | 43           | 17 26 0      |
| -0.0003686 | -0.0003000 | 0.0000000 |   | 1376.6865700 | 1376.6869386 |
| 891: 46    | 18         | 29        | 1 | 45           | 17 28 0      |
| -0.0002771 | -0.0003000 | 0.0000000 |   | 1377.2021100 | 1377.2023871 |
| 892: 48    | 18         | 31        | 1 | 47           | 17 30 0      |
| -0.0000814 | -0.0003000 | 0.0000000 |   | 1377.7170500 | 1377.7171314 |
| 893: 49    | 18         | 32        | 1 | 48           | 17 31 0      |
| -0.0001210 | -0.0003000 | 0.0000000 |   | 1377.9741100 | 1377.9742310 |
| 894: 51    | 18         | 34        | 1 | 50           | 17 33 0      |
| -0.0003081 | -0.0003000 | 0.0000000 |   | 1378.4875600 | 1378.4878681 |
| 895: 19    | 19         | 0         | 1 | 18           | 18 1 0       |
| -0.0005346 | -0.0003000 | 0.0000000 |   | 1372.1489600 | 1372.1494946 |
| 896: 20    | 19         | 1         | 1 | 19           | 18 2 0       |
| -0.0000282 | -0.0003000 | 0.0000000 |   | 1372.4107500 | 1372.4107782 |
| 897: 21    | 19         | 2         | 1 | 20           | 18 3 0       |
| -0.0005856 | -0.0003000 | 0.0000000 |   | 1372.6713800 | 1372.6719656 |
| 898: 23    | 19         | 4         | 1 | 22           | 18 5 0       |
| -0.0000726 | -0.0003000 | 0.0000000 |   | 1373.1939700 | 1373.1940426 |
| 899: 24    | 19         | 5         | 1 | 23           | 18 6 0       |
| -0.0000271 | -0.0003000 | 0.0000000 |   | 1373.4549000 | 1373.4549271 |
| 900: 26    | 19         | 7         | 1 | 25           | 18 8 0       |
| -0.0002556 | -0.0003000 | 0.0000000 |   | 1373.9761200 | 1373.9763756 |
| 901: 27    | 19         | 8         | 1 | 26           | 18 9 0       |
| 0.0002255  | -0.0003000 | 0.0000000 |   | 1374.2371600 | 1374.2369345 |
| 902: 28    | 19         | 9         | 1 | 27           | 18 10 0      |
| -0.0003597 | -0.0003000 | 0.0000000 |   | 1374.4970200 | 1374.4973797 |
| 903: 29    | 19         | 10        | 1 | 28           | 18 11 0      |
| -0.0004384 | -0.0003000 | 0.0000000 |   | 1374.7572700 | 1374.7577084 |
| 904: 33    | 19         | 14        | 1 | 32           | 18 15 0      |
| 0.0005240  | -0.0003000 | 0.0000000 |   | 1375.7983300 | 1375.7978060 |
| 905: 34    | 19         | 15        | 1 | 33           | 18 16 0      |
| 0.0004578  | -0.0003000 | 0.0000000 |   | 1376.0579700 | 1376.0575122 |
| 906: 35    | 19         | 16        | 1 | 34           | 18 17 0      |
| -0.0002056 | -0.0003000 | 0.0000000 |   | 1376.3168800 | 1376.3170856 |
| 907: 36    | 19         | 17        | 1 | 35           | 18 18 0      |
| 0.0001167  | -0.0003000 | 0.0000000 |   | 1376.5766400 | 1376.5765233 |

|                                 |              |              |
|---------------------------------|--------------|--------------|
| 908: 38 19 19 1 37 18 20 0      | 1377.0952900 | 1377.0949801 |
| 0.0003099 -0.0003000 0.0000000  |              |              |
| 909: 39 19 20 1 38 18 21 0      | 1377.3548500 | 1377.3539933 |
| 0.0008567 -0.0003000 0.0000000  |              |              |
| 910: 19 19 1 1 18 18 0 0        | 1372.1489600 | 1372.1494946 |
| -0.0005346 -0.0003000 0.0000000 |              |              |
| 911: 20 19 2 1 19 18 1 0        | 1372.4107500 | 1372.4107782 |
| -0.0000282 -0.0003000 0.0000000 |              |              |
| 912: 21 19 3 1 20 18 2 0        | 1372.6713800 | 1372.6719656 |
| -0.0005856 -0.0003000 0.0000000 |              |              |
| 913: 23 19 5 1 22 18 4 0        | 1373.1939700 | 1373.1940426 |
| -0.0000726 -0.0003000 0.0000000 |              |              |
| 914: 24 19 6 1 23 18 5 0        | 1373.4549000 | 1373.4549271 |
| -0.0000271 -0.0003000 0.0000000 |              |              |
| 915: 26 19 8 1 25 18 7 0        | 1373.9761200 | 1373.9763756 |
| -0.0002556 -0.0003000 0.0000000 |              |              |
| 916: 27 19 9 1 26 18 8 0        | 1374.2371600 | 1374.2369345 |
| 0.0002255 -0.0003000 0.0000000  |              |              |
| 917: 28 19 10 1 27 18 9 0       | 1374.4970200 | 1374.4973797 |
| -0.0003597 -0.0003000 0.0000000 |              |              |
| 918: 29 19 11 1 28 18 10 0      | 1374.7572700 | 1374.7577084 |
| -0.0004384 -0.0003000 0.0000000 |              |              |
| 919: 33 19 15 1 32 18 14 0      | 1375.7983300 | 1375.7978060 |
| 0.0005240 -0.0003000 0.0000000  |              |              |
| 920: 34 19 16 1 33 18 15 0      | 1376.0579700 | 1376.0575122 |
| 0.0004578 -0.0003000 0.0000000  |              |              |
| 921: 35 19 17 1 34 18 16 0      | 1376.3168800 | 1376.3170856 |
| -0.0002056 -0.0003000 0.0000000 |              |              |
| 922: 36 19 18 1 35 18 17 0      | 1376.5766400 | 1376.5765233 |
| 0.0001167 -0.0003000 0.0000000  |              |              |
| 923: 38 19 20 1 37 18 19 0      | 1377.0952900 | 1377.0949801 |
| 0.0003099 -0.0003000 0.0000000  |              |              |
| 924: 39 19 21 1 38 18 20 0      | 1377.3548500 | 1377.3539933 |
| 0.0008567 -0.0003000 0.0000000  |              |              |
| 925: 20 20 0 1 19 19 1 0        | 1374.3276100 | 1374.3277678 |
| -0.0001578 -0.0003000 0.0000000 |              |              |
| 926: 22 20 2 1 21 19 3 0        | 1374.8504300 | 1374.8503431 |
| 0.0000869 -0.0003000 0.0000000  |              |              |
| 927: 23 20 3 1 22 19 4 0        | 1375.1119000 | 1375.1114859 |
| 0.0004141 -0.0003000 0.0000000  |              |              |
| 928: 24 20 4 1 23 19 5 0        | 1375.3730000 | 1375.3725288 |
| 0.0004712 -0.0003000 0.0000000  |              |              |
| 929: 26 20 6 1 25 19 7 0        | 1375.8941000 | 1375.8943051 |
| -0.0002051 -0.0003000 0.0000000 |              |              |
| 930: 29 20 9 1 28 19 10 0       | 1376.6756200 | 1376.6761586 |
| -0.0005386 -0.0003000 0.0000000 |              |              |
| 931: 30 20 10 1 29 19 11 0      | 1376.9362200 | 1376.9365499 |
| -0.0003299 -0.0003000 0.0000000 |              |              |
| 932: 32 20 12 1 31 19 13 0      | 1377.4576700 | 1377.4569771 |
| 0.0006929 -0.0003000 0.0000000  |              |              |
| 933: 34 20 14 1 33 19 15 0      | 1377.9780600 | 1377.9769127 |
| 0.0011473 -0.0003000 0.0000000  |              |              |
| 934: 36 20 16 1 35 19 17 0      | 1378.4968600 | 1378.4963351 |
| 0.0005249 -0.0003000 0.0000000  |              |              |
| 935: 20 20 1 1 19 19 0 0        | 1374.3276100 | 1374.3277678 |
| -0.0001578 -0.0003000 0.0000000 |              |              |
| 936: 22 20 3 1 21 19 2 0        | 1374.8504300 | 1374.8503431 |
| 0.0000869 -0.0003000 0.0000000  |              |              |
| 937: 23 20 4 1 22 19 3 0        | 1375.1119000 | 1375.1114859 |
| 0.0004141 -0.0003000 0.0000000  |              |              |
| 938: 24 20 5 1 23 19 4 0        | 1375.3730000 | 1375.3725288 |
| 0.0004712 -0.0003000 0.0000000  |              |              |
| 939: 26 20 7 1 25 19 6 0        | 1375.8941000 | 1375.8943051 |
| -0.0002051 -0.0003000 0.0000000 |              |              |
| 940: 29 20 10 1 28 19 9 0       | 1376.6756200 | 1376.6761586 |

|            |            |              |              |              |
|------------|------------|--------------|--------------|--------------|
| -0.0005386 | -0.0003000 | 0.0000000    |              |              |
| 941: 30    | 20 11      | 1 29 19 10 0 | 1376.9362200 | 1376.9365499 |
| -0.0003299 | -0.0003000 | 0.0000000    |              |              |
| 942: 32    | 20 13      | 1 31 19 12 0 | 1377.4576700 | 1377.4569771 |
| 0.0006929  | -0.0003000 | 0.0000000    |              |              |
| 943: 34    | 20 15      | 1 33 19 14 0 | 1377.9780600 | 1377.9769127 |
| 0.0011473  | -0.0003000 | 0.0000000    |              |              |
| 944: 36    | 20 17      | 1 35 19 16 0 | 1378.4968600 | 1378.4963351 |
| 0.0005249  | -0.0003000 | 0.0000000    |              |              |
| 945: 21    | 21 0       | 1 20 20 1 0  | 1376.4673900 | 1376.4679005 |
| -0.0005105 | -0.0003000 | 0.0000000    |              |              |
| 946: 24    | 21 3       | 1 23 20 4 0  | 1377.2514200 | 1377.2517786 |
| -0.0003586 | -0.0003000 | 0.0000000    |              |              |
| 947: 25    | 21 4       | 1 24 20 5 0  | 1377.5121200 | 1377.5128764 |
| -0.0007564 | -0.0003000 | 0.0000000    |              |              |
| 948: 27    | 21 6       | 1 26 20 7 0  | 1378.0345600 | 1378.0347654 |
| -0.0002054 | -0.0003000 | 0.0000000    |              |              |
| 949: 30    | 21 9       | 1 29 20 10 0 | 1378.8174600 | 1378.8167949 |
| 0.0006651  | -0.0003000 | 0.0000000    |              |              |
| 950: 33    | 21 12      | 1 32 20 13 0 | 1379.5983100 | 1379.5977991 |
| 0.0005109  | -0.0003000 | 0.0000000    |              |              |
| 951: 21    | 21 1       | 1 20 20 0 0  | 1376.4673900 | 1376.4679005 |
| -0.0005105 | -0.0003000 | 0.0000000    |              |              |
| 952: 24    | 21 4       | 1 23 20 3 0  | 1377.2514200 | 1377.2517786 |
| -0.0003586 | -0.0003000 | 0.0000000    |              |              |
| 953: 25    | 21 5       | 1 24 20 4 0  | 1377.5121200 | 1377.5128764 |
| -0.0007564 | -0.0003000 | 0.0000000    |              |              |
| 954: 27    | 21 7       | 1 26 20 6 0  | 1378.0345600 | 1378.0347654 |
| -0.0002054 | -0.0003000 | 0.0000000    |              |              |
| 955: 30    | 21 10      | 1 29 20 9 0  | 1378.8174600 | 1378.8167949 |
| 0.0006651  | -0.0003000 | 0.0000000    |              |              |
| 956: 33    | 21 13      | 1 32 20 12 0 | 1379.5983100 | 1379.5977991 |
| 0.0005109  | -0.0003000 | 0.0000000    |              |              |
| 957: 25    | 9 16       | 1 26 10 17 0 | 1294.0800700 | 1294.0797749 |
| 0.0002951  | -0.0003000 | 0.0000000    |              |              |
| 958: 24    | 9 15       | 1 25 10 16 0 | 1294.3456200 | 1294.3457008 |
| -0.0000808 | -0.0003000 | 0.0000000    |              |              |
| 959: 23    | 9 14       | 1 24 10 15 0 | 1294.6113400 | 1294.6115385 |
| -0.0001985 | -0.0003000 | 0.0000000    |              |              |
| 960: 21    | 9 12       | 1 22 10 13 0 | 1295.1421300 | 1295.1429223 |
| -0.0007923 | -0.0003000 | 0.0000000    |              |              |
| 961: 20    | 9 11       | 1 21 10 12 0 | 1295.4078900 | 1295.4084556 |
| -0.0005656 | -0.0003000 | 0.0000000    |              |              |
| 962: 19    | 9 10       | 1 20 10 11 0 | 1295.6735500 | 1295.6738747 |
| -0.0003247 | -0.0003000 | 0.0000000    |              |              |
| 963: 18    | 9 9        | 1 19 10 10 0 | 1295.9384200 | 1295.9391739 |
| -0.0007539 | -0.0003000 | 0.0000000    |              |              |
| 964: 17    | 9 8        | 1 18 10 9 0  | 1296.2042000 | 1296.2043475 |
| -0.0001475 | -0.0003000 | 0.0000000    |              |              |
| 965: 25    | 9 17       | 1 26 10 16 0 | 1294.0800700 | 1294.0797749 |
| 0.0002951  | -0.0003000 | 0.0000000    |              |              |
| 966: 24    | 9 16       | 1 25 10 15 0 | 1294.3456200 | 1294.3457008 |
| -0.0000808 | -0.0003000 | 0.0000000    |              |              |
| 967: 23    | 9 15       | 1 24 10 14 0 | 1294.6113400 | 1294.6115385 |
| -0.0001985 | -0.0003000 | 0.0000000    |              |              |
| 968: 21    | 9 13       | 1 22 10 12 0 | 1295.1421300 | 1295.1429223 |
| -0.0007923 | -0.0003000 | 0.0000000    |              |              |
| 969: 20    | 9 12       | 1 21 10 11 0 | 1295.4078900 | 1295.4084556 |
| -0.0005656 | -0.0003000 | 0.0000000    |              |              |
| 970: 19    | 9 11       | 1 20 10 10 0 | 1295.6735500 | 1295.6738747 |
| -0.0003247 | -0.0003000 | 0.0000000    |              |              |
| 971: 18    | 9 10       | 1 19 10 9 0  | 1295.9384200 | 1295.9391739 |
| -0.0007539 | -0.0003000 | 0.0000000    |              |              |
| 972: 17    | 9 9        | 1 18 10 8 0  | 1296.2042000 | 1296.2043475 |
| -0.0001475 | -0.0003000 | 0.0000000    |              |              |

|            |            |           |    |   |    |    |    |   |              |              |
|------------|------------|-----------|----|---|----|----|----|---|--------------|--------------|
| 973:       | 15         | 10        | 6  | 1 | 16 | 11 | 5  | 0 | 1294.0756100 | 1294.0760321 |
| -0.0004221 | -0.0003000 | 0.0000000 |    |   |    |    |    |   |              |              |
| 974:       | 14         | 10        | 5  | 1 | 15 | 11 | 4  | 0 | 1294.3404800 | 1294.3409276 |
| -0.0004476 | -0.0003000 | 0.0000000 |    |   |    |    |    |   |              |              |
| 975:       | 13         | 10        | 4  | 1 | 14 | 11 | 3  | 0 | 1294.6056900 | 1294.6056689 |
| 0.0000211  | -0.0003000 | 0.0000000 |    |   |    |    |    |   |              |              |
| 976:       | 12         | 10        | 3  | 1 | 13 | 11 | 2  | 0 | 1294.8705300 | 1294.8702522 |
| 0.0002778  | -0.0003000 | 0.0000000 |    |   |    |    |    |   |              |              |
| 977:       | 10         | 10        | 1  | 1 | 11 | 11 | 0  | 0 | 1295.3998400 | 1295.3989307 |
| 0.0009093  | -0.0003000 | 0.0000000 |    |   |    |    |    |   |              |              |
| 978:       | 15         | 10        | 5  | 1 | 16 | 11 | 6  | 0 | 1294.0756100 | 1294.0760321 |
| -0.0004221 | -0.0003000 | 0.0000000 |    |   |    |    |    |   |              |              |
| 979:       | 14         | 10        | 4  | 1 | 15 | 11 | 5  | 0 | 1294.3404800 | 1294.3409276 |
| -0.0004476 | -0.0003000 | 0.0000000 |    |   |    |    |    |   |              |              |
| 980:       | 13         | 10        | 3  | 1 | 14 | 11 | 4  | 0 | 1294.6056900 | 1294.6056689 |
| 0.0000211  | -0.0003000 | 0.0000000 |    |   |    |    |    |   |              |              |
| 981:       | 12         | 10        | 2  | 1 | 13 | 11 | 3  | 0 | 1294.8705300 | 1294.8702522 |
| 0.0002778  | -0.0003000 | 0.0000000 |    |   |    |    |    |   |              |              |
| 982:       | 10         | 10        | 0  | 1 | 11 | 11 | 1  | 0 | 1295.3998400 | 1295.3989307 |
| 0.0009093  | -0.0003000 | 0.0000000 |    |   |    |    |    |   |              |              |
| 983:       | 20         | 11        | 10 | 1 | 21 | 12 | 9  | 0 | 1290.0829300 | 1290.0825646 |
| 0.0003654  | -0.0003000 | 0.0000000 |    |   |    |    |    |   |              |              |
| 984:       | 19         | 11        | 9  | 1 | 20 | 12 | 8  | 0 | 1290.3488100 | 1290.3483355 |
| 0.0004745  | -0.0003000 | 0.0000000 |    |   |    |    |    |   |              |              |
| 985:       | 18         | 11        | 8  | 1 | 19 | 12 | 7  | 0 | 1290.6139100 | 1290.6139639 |
| -0.0000539 | -0.0003000 | 0.0000000 |    |   |    |    |    |   |              |              |
| 986:       | 17         | 11        | 7  | 1 | 18 | 12 | 6  | 0 | 1290.8795200 | 1290.8794459 |
| 0.0000741  | -0.0003000 | 0.0000000 |    |   |    |    |    |   |              |              |
| 987:       | 16         | 11        | 6  | 1 | 17 | 12 | 5  | 0 | 1291.1442900 | 1291.1447777 |
| -0.0004877 | -0.0003000 | 0.0000000 |    |   |    |    |    |   |              |              |
| 988:       | 15         | 11        | 5  | 1 | 16 | 12 | 4  | 0 | 1291.4094300 | 1291.4099555 |
| -0.0005255 | -0.0003000 | 0.0000000 |    |   |    |    |    |   |              |              |
| 989:       | 14         | 11        | 4  | 1 | 15 | 12 | 3  | 0 | 1291.6747100 | 1291.6749760 |
| -0.0002660 | -0.0003000 | 0.0000000 |    |   |    |    |    |   |              |              |
| 990:       | 13         | 11        | 3  | 1 | 14 | 12 | 2  | 0 | 1291.9397700 | 1291.9398356 |
| -0.0000656 | -0.0003000 | 0.0000000 |    |   |    |    |    |   |              |              |
| 991:       | 12         | 11        | 2  | 1 | 13 | 12 | 1  | 0 | 1292.2046800 | 1292.2045310 |
| 0.0001490  | -0.0003000 | 0.0000000 |    |   |    |    |    |   |              |              |
| 992:       | 11         | 11        | 1  | 1 | 12 | 12 | 0  | 0 | 1292.4695300 | 1292.4690592 |
| 0.0004708  | -0.0003000 | 0.0000000 |    |   |    |    |    |   |              |              |
| 993:       | 20         | 11        | 9  | 1 | 21 | 12 | 10 | 0 | 1290.0829300 | 1290.0825646 |
| 0.0003654  | -0.0003000 | 0.0000000 |    |   |    |    |    |   |              |              |
| 994:       | 19         | 11        | 8  | 1 | 20 | 12 | 9  | 0 | 1290.3488100 | 1290.3483355 |
| 0.0004745  | -0.0003000 | 0.0000000 |    |   |    |    |    |   |              |              |
| 995:       | 18         | 11        | 7  | 1 | 19 | 12 | 8  | 0 | 1290.6139100 | 1290.6139639 |
| -0.0000539 | -0.0003000 | 0.0000000 |    |   |    |    |    |   |              |              |
| 996:       | 17         | 11        | 6  | 1 | 18 | 12 | 7  | 0 | 1290.8795200 | 1290.8794459 |
| 0.0000741  | -0.0003000 | 0.0000000 |    |   |    |    |    |   |              |              |
| 997:       | 16         | 11        | 5  | 1 | 17 | 12 | 6  | 0 | 1291.1442900 | 1291.1447777 |
| -0.0004877 | -0.0003000 | 0.0000000 |    |   |    |    |    |   |              |              |
| 998:       | 15         | 11        | 4  | 1 | 16 | 12 | 5  | 0 | 1291.4094300 | 1291.4099555 |
| -0.0005255 | -0.0003000 | 0.0000000 |    |   |    |    |    |   |              |              |
| 999:       | 14         | 11        | 3  | 1 | 15 | 12 | 4  | 0 | 1291.6747100 | 1291.6749760 |
| -0.0002660 | -0.0003000 | 0.0000000 |    |   |    |    |    |   |              |              |
| 1000:      | 13         | 11        | 2  | 1 | 14 | 12 | 3  | 0 | 1291.9397700 | 1291.9398356 |
| -0.0000656 | -0.0003000 | 0.0000000 |    |   |    |    |    |   |              |              |
| 1001:      | 12         | 11        | 1  | 1 | 13 | 12 | 2  | 0 | 1292.2046800 | 1292.2045310 |
| 0.0001490  | -0.0003000 | 0.0000000 |    |   |    |    |    |   |              |              |
| 1002:      | 11         | 11        | 0  | 1 | 12 | 12 | 1  | 0 | 1292.4695300 | 1292.4690592 |
| 0.0004708  | -0.0003000 | 0.0000000 |    |   |    |    |    |   |              |              |
| 1003:      | 25         | 12        | 14 | 1 | 26 | 13 | 13 | 0 | 1286.0776400 | 1286.0773021 |
| 0.0003379  | -0.0003000 | 0.0000000 |    |   |    |    |    |   |              |              |
| 1004:      | 24         | 12        | 13 | 1 | 25 | 13 | 12 | 0 | 1286.3440600 | 1286.3439237 |
| 0.0001363  | -0.0003000 | 0.0000000 |    |   |    |    |    |   |              |              |
| 1005:      | 23         | 12        | 12 | 1 | 24 | 13 | 11 | 0 | 1286.6106300 | 1286.6104138 |

|            |            |           |              |              |
|------------|------------|-----------|--------------|--------------|
| 0.0002162  | -0.0003000 | 0.0000000 |              |              |
| 1006:      | 21         | 12        | 10           | 1 22 13 9 0  |
| 0.0000356  | -0.0003000 | 0.0000000 | 1287.1430200 | 1287.1429844 |
| 1007:      | 20         | 12        | 9            | 1 21 13 8 0  |
| 0.0001529  | -0.0003000 | 0.0000000 | 1287.4092100 | 1287.4090571 |
| 1008:      | 19         | 12        | 8            | 1 20 13 7 0  |
| 0.0004567  | -0.0003000 | 0.0000000 | 1287.6754400 | 1287.6749833 |
| 1009:      | 18         | 12        | 7            | 1 19 13 6 0  |
| 0.0001806  | -0.0003000 | 0.0000000 | 1287.9409400 | 1287.9407594 |
| 1010:      | 17         | 12        | 6            | 1 18 13 5 0  |
| -0.0004220 | -0.0003000 | 0.0000000 | 1288.2059600 | 1288.2063820 |
| 1011:      | 16         | 12        | 5            | 1 17 13 4 0  |
| 0.0000723  | -0.0003000 | 0.0000000 | 1288.4719200 | 1288.4718477 |
| 1012:      | 14         | 12        | 3            | 1 15 13 2 0  |
| -0.0001556 | -0.0003000 | 0.0000000 | 1289.0021400 | 1289.0022956 |
| 1013:      | 13         | 12        | 2            | 1 14 13 1 0  |
| -0.0001216 | -0.0003000 | 0.0000000 | 1289.2671500 | 1289.2672716 |
| 1014:      | 12         | 12        | 1            | 1 13 13 0 0  |
| 0.0007716  | -0.0003000 | 0.0000000 | 1289.5328500 | 1289.5320784 |
| 1015:      | 25         | 12        | 13           | 1 26 13 14 0 |
| 0.0003379  | -0.0003000 | 0.0000000 | 1286.0776400 | 1286.0773021 |
| 1016:      | 24         | 12        | 12           | 1 25 13 13 0 |
| 0.0001363  | -0.0003000 | 0.0000000 | 1286.3440600 | 1286.3439237 |
| 1017:      | 23         | 12        | 11           | 1 24 13 12 0 |
| 0.0002162  | -0.0003000 | 0.0000000 | 1286.6106300 | 1286.6104138 |
| 1018:      | 21         | 12        | 9            | 1 22 13 10 0 |
| 0.0000356  | -0.0003000 | 0.0000000 | 1287.1430200 | 1287.1429844 |
| 1019:      | 20         | 12        | 8            | 1 21 13 9 0  |
| 0.0001529  | -0.0003000 | 0.0000000 | 1287.4092100 | 1287.4090571 |
| 1020:      | 19         | 12        | 7            | 1 20 13 8 0  |
| 0.0004567  | -0.0003000 | 0.0000000 | 1287.6754400 | 1287.6749833 |
| 1021:      | 18         | 12        | 6            | 1 19 13 7 0  |
| 0.0001806  | -0.0003000 | 0.0000000 | 1287.9409400 | 1287.9407594 |
| 1022:      | 17         | 12        | 5            | 1 18 13 6 0  |
| -0.0004220 | -0.0003000 | 0.0000000 | 1288.2059600 | 1288.2063820 |
| 1023:      | 16         | 12        | 4            | 1 17 13 5 0  |
| 0.0000723  | -0.0003000 | 0.0000000 | 1288.4719200 | 1288.4718477 |
| 1024:      | 14         | 12        | 2            | 1 15 13 3 0  |
| -0.0001556 | -0.0003000 | 0.0000000 | 1289.0021400 | 1289.0022956 |
| 1025:      | 13         | 12        | 1            | 1 14 13 2 0  |
| -0.0001216 | -0.0003000 | 0.0000000 | 1289.2671500 | 1289.2672716 |
| 1026:      | 12         | 12        | 0            | 1 13 13 1 0  |
| 0.0007716  | -0.0003000 | 0.0000000 | 1289.5328500 | 1289.5320784 |
| 1027:      | 29         | 13        | 17           | 1 30 14 16 0 |
| 0.0007759  | -0.0003000 | 0.0000000 | 1282.3295200 | 1282.3287441 |
| 1028:      | 28         | 13        | 16           | 1 29 14 15 0 |
| 0.0001978  | -0.0003000 | 0.0000000 | 1282.5962700 | 1282.5960722 |
| 1029:      | 27         | 13        | 15           | 1 28 14 14 0 |
| -0.0003753 | -0.0003000 | 0.0000000 | 1282.8629000 | 1282.8632753 |
| 1030:      | 26         | 13        | 14           | 1 27 14 13 0 |
| -0.0000397 | -0.0003000 | 0.0000000 | 1283.1303100 | 1283.1303497 |
| 1031:      | 25         | 13        | 13           | 1 26 14 12 0 |
| -0.0001216 | -0.0003000 | 0.0000000 | 1283.3971700 | 1283.3972916 |
| 1032:      | 22         | 13        | 10           | 1 23 14 9 0  |
| -0.0000669 | -0.0003000 | 0.0000000 | 1284.1972200 | 1284.1972869 |
| 1033:      | 21         | 13        | 9            | 1 22 14 8 0  |
| -0.0005136 | -0.0003000 | 0.0000000 | 1284.4631500 | 1284.4636636 |
| 1034:      | 20         | 13        | 8            | 1 21 14 7 0  |
| -0.0005004 | -0.0003000 | 0.0000000 | 1284.7293900 | 1284.7298904 |
| 1035:      | 19         | 13        | 7            | 1 20 14 6 0  |
| 0.0004458  | -0.0003000 | 0.0000000 | 1284.9964100 | 1284.9959642 |
| 1036:      | 18         | 13        | 6            | 1 19 14 5 0  |
| -0.0000517 | -0.0003000 | 0.0000000 | 1285.2618300 | 1285.2618817 |
| 1037:      | 17         | 13        | 5            | 1 18 14 4 0  |
| -0.0007398 | -0.0003000 | 0.0000000 | 1285.5269000 | 1285.5276398 |

|            |            |           |    |   |    |    |    |   |              |              |
|------------|------------|-----------|----|---|----|----|----|---|--------------|--------------|
| 1038:      | 16         | 13        | 4  | 1 | 17 | 14 | 3  | 0 | 1285.7928100 | 1285.7932356 |
| -0.0004256 | -0.0003000 | 0.0000000 |    |   |    |    |    |   |              |              |
| 1039:      | 14         | 13        | 2  | 1 | 15 | 14 | 1  | 0 | 1286.3238300 | 1286.3239283 |
| -0.0000983 | -0.0003000 | 0.0000000 |    |   |    |    |    |   |              |              |
| 1040:      | 13         | 13        | 1  | 1 | 14 | 14 | 0  | 0 | 1286.5886300 | 1286.5890195 |
| -0.0003895 | -0.0003000 | 0.0000000 |    |   |    |    |    |   |              |              |
| 1041:      | 29         | 13        | 16 | 1 | 30 | 14 | 17 | 0 | 1282.3295200 | 1282.3287441 |
| 0.0007759  | -0.0003000 | 0.0000000 |    |   |    |    |    |   |              |              |
| 1042:      | 28         | 13        | 15 | 1 | 29 | 14 | 16 | 0 | 1282.5962700 | 1282.5960722 |
| 0.0001978  | -0.0003000 | 0.0000000 |    |   |    |    |    |   |              |              |
| 1043:      | 27         | 13        | 14 | 1 | 28 | 14 | 15 | 0 | 1282.8629000 | 1282.8632753 |
| -0.0003753 | -0.0003000 | 0.0000000 |    |   |    |    |    |   |              |              |
| 1044:      | 26         | 13        | 13 | 1 | 27 | 14 | 14 | 0 | 1283.1303100 | 1283.1303497 |
| -0.0000397 | -0.0003000 | 0.0000000 |    |   |    |    |    |   |              |              |
| 1045:      | 25         | 13        | 12 | 1 | 26 | 14 | 13 | 0 | 1283.3971700 | 1283.3972916 |
| -0.0001216 | -0.0003000 | 0.0000000 |    |   |    |    |    |   |              |              |
| 1046:      | 22         | 13        | 9  | 1 | 23 | 14 | 10 | 0 | 1284.1972200 | 1284.1972869 |
| -0.0000669 | -0.0003000 | 0.0000000 |    |   |    |    |    |   |              |              |
| 1047:      | 21         | 13        | 8  | 1 | 22 | 14 | 9  | 0 | 1284.4631500 | 1284.4636636 |
| -0.0005136 | -0.0003000 | 0.0000000 |    |   |    |    |    |   |              |              |
| 1048:      | 20         | 13        | 7  | 1 | 21 | 14 | 8  | 0 | 1284.7293900 | 1284.7298904 |
| -0.0005004 | -0.0003000 | 0.0000000 |    |   |    |    |    |   |              |              |
| 1049:      | 19         | 13        | 6  | 1 | 20 | 14 | 7  | 0 | 1284.9964100 | 1284.9959642 |
| 0.0004458  | -0.0003000 | 0.0000000 |    |   |    |    |    |   |              |              |
| 1050:      | 18         | 13        | 5  | 1 | 19 | 14 | 6  | 0 | 1285.2618300 | 1285.2618817 |
| -0.0000517 | -0.0003000 | 0.0000000 |    |   |    |    |    |   |              |              |
| 1051:      | 17         | 13        | 4  | 1 | 18 | 14 | 5  | 0 | 1285.5269000 | 1285.5276398 |
| -0.0007398 | -0.0003000 | 0.0000000 |    |   |    |    |    |   |              |              |
| 1052:      | 16         | 13        | 3  | 1 | 17 | 14 | 4  | 0 | 1285.7928100 | 1285.7932356 |
| -0.0004256 | -0.0003000 | 0.0000000 |    |   |    |    |    |   |              |              |
| 1053:      | 14         | 13        | 1  | 1 | 15 | 14 | 2  | 0 | 1286.3238300 | 1286.3239283 |
| -0.0000983 | -0.0003000 | 0.0000000 |    |   |    |    |    |   |              |              |
| 1054:      | 13         | 13        | 0  | 1 | 14 | 14 | 1  | 0 | 1286.5886300 | 1286.5890195 |
| -0.0003895 | -0.0003000 | 0.0000000 |    |   |    |    |    |   |              |              |
| 1055:      | 28         | 14        | 15 | 1 | 29 | 15 | 14 | 0 | 1279.9118900 | 1279.9108760 |
| 0.0010140  | -0.0003000 | 0.0000000 |    |   |    |    |    |   |              |              |
| 1056:      | 27         | 14        | 14 | 1 | 28 | 15 | 13 | 0 | 1280.1785800 | 1280.1782730 |
| 0.0003070  | -0.0003000 | 0.0000000 |    |   |    |    |    |   |              |              |
| 1057:      | 26         | 14        | 13 | 1 | 27 | 15 | 12 | 0 | 1280.4461700 | 1280.4455334 |
| 0.0006366  | -0.0003000 | 0.0000000 |    |   |    |    |    |   |              |              |
| 1058:      | 24         | 14        | 11 | 1 | 25 | 15 | 10 | 0 | 1280.9790600 | 1280.9796318 |
| -0.0005718 | -0.0003000 | 0.0000000 |    |   |    |    |    |   |              |              |
| 1059:      | 22         | 14        | 9  | 1 | 23 | 15 | 8  | 0 | 1281.5122200 | 1281.5131452 |
| -0.0009252 | -0.0003000 | 0.0000000 |    |   |    |    |    |   |              |              |
| 1060:      | 21         | 14        | 8  | 1 | 22 | 15 | 7  | 0 | 1281.7788000 | 1281.7796746 |
| -0.0008746 | -0.0003000 | 0.0000000 |    |   |    |    |    |   |              |              |
| 1061:      | 19         | 14        | 6  | 1 | 20 | 15 | 5  | 0 | 1282.3126700 | 1282.3122641 |
| 0.0004059  | -0.0003000 | 0.0000000 |    |   |    |    |    |   |              |              |
| 1062:      | 18         | 14        | 5  | 1 | 19 | 15 | 4  | 0 | 1282.5780900 | 1282.5783182 |
| -0.0002282 | -0.0003000 | 0.0000000 |    |   |    |    |    |   |              |              |
| 1063:      | 17         | 14        | 4  | 1 | 18 | 15 | 3  | 0 | 1282.8450300 | 1282.8442080 |
| 0.0008220  | -0.0003000 | 0.0000000 |    |   |    |    |    |   |              |              |
| 1064:      | 16         | 14        | 3  | 1 | 17 | 15 | 2  | 0 | 1283.1096600 | 1283.1099308 |
| -0.0002708 | -0.0003000 | 0.0000000 |    |   |    |    |    |   |              |              |
| 1065:      | 15         | 14        | 2  | 1 | 16 | 15 | 1  | 0 | 1283.3758100 | 1283.3754839 |
| 0.0003261  | -0.0003000 | 0.0000000 |    |   |    |    |    |   |              |              |
| 1066:      | 28         | 14        | 14 | 1 | 29 | 15 | 15 | 0 | 1279.9118900 | 1279.9108760 |
| 0.0010140  | -0.0003000 | 0.0000000 |    |   |    |    |    |   |              |              |
| 1067:      | 27         | 14        | 13 | 1 | 28 | 15 | 14 | 0 | 1280.1785800 | 1280.1782730 |
| 0.0003070  | -0.0003000 | 0.0000000 |    |   |    |    |    |   |              |              |
| 1068:      | 26         | 14        | 12 | 1 | 27 | 15 | 13 | 0 | 1280.4461700 | 1280.4455334 |
| 0.0006366  | -0.0003000 | 0.0000000 |    |   |    |    |    |   |              |              |
| 1069:      | 24         | 14        | 10 | 1 | 25 | 15 | 11 | 0 | 1280.9790600 | 1280.9796318 |
| -0.0005718 | -0.0003000 | 0.0000000 |    |   |    |    |    |   |              |              |
| 1070:      | 22         | 14        | 8  | 1 | 23 | 15 | 9  | 0 | 1281.5122200 | 1281.5131452 |

|            |            |           |              |              |
|------------|------------|-----------|--------------|--------------|
| -0.0009252 | -0.0003000 | 0.0000000 |              |              |
| 1071:      | 21         | 14        | 7            | 1 22 15 8 0  |
| -0.0008746 | -0.0003000 | 0.0000000 | 1281.7788000 | 1281.7796746 |
| 1072:      | 19         | 14        | 5            | 1 20 15 6 0  |
| 0.0004059  | -0.0003000 | 0.0000000 | 1282.3126700 | 1282.3122641 |
| 1073:      | 18         | 14        | 4            | 1 19 15 5 0  |
| -0.0002282 | -0.0003000 | 0.0000000 | 1282.5780900 | 1282.5783182 |
| 1074:      | 17         | 14        | 3            | 1 18 15 4 0  |
| 0.0008220  | -0.0003000 | 0.0000000 | 1282.8450300 | 1282.8442080 |
| 1075:      | 16         | 14        | 2            | 1 17 15 3 0  |
| -0.0002708 | -0.0003000 | 0.0000000 | 1283.1096600 | 1283.1099308 |
| 1076:      | 15         | 14        | 1            | 1 16 15 2 0  |
| 0.0003261  | -0.0003000 | 0.0000000 | 1283.3758100 | 1283.3754839 |
| 1077:      | 24         | 15        | 10           | 1 25 16 9 0  |
| 0.0002454  | -0.0003000 | 0.0000000 | 1278.2917000 | 1278.2914546 |
| 1078:      | 23         | 15        | 9            | 1 24 16 8 0  |
| -0.0001923 | -0.0003000 | 0.0000000 | 1278.5582500 | 1278.5584423 |
| 1079:      | 22         | 15        | 8            | 1 23 16 7 0  |
| -0.0005554 | -0.0003000 | 0.0000000 | 1278.8247200 | 1278.8252754 |
| 1080:      | 21         | 15        | 7            | 1 22 16 6 0  |
| -0.0002011 | -0.0003000 | 0.0000000 | 1279.0917500 | 1279.0919511 |
| 1081:      | 20         | 15        | 6            | 1 21 16 5 0  |
| 0.0004236  | -0.0003000 | 0.0000000 | 1279.3588900 | 1279.3584664 |
| 1082:      | 19         | 15        | 5            | 1 20 16 4 0  |
| 0.0006613  | -0.0003000 | 0.0000000 | 1279.6254800 | 1279.6248187 |
| 1083:      | 17         | 15        | 3            | 1 18 16 2 0  |
| -0.0002335 | -0.0003000 | 0.0000000 | 1280.1567900 | 1280.1570235 |
| 1084:      | 15         | 15        | 1            | 1 16 16 0 0  |
| 0.0003656  | -0.0003000 | 0.0000000 | 1280.6889100 | 1280.6885444 |
| 1085:      | 24         | 15        | 9            | 1 25 16 10 0 |
| 0.0002454  | -0.0003000 | 0.0000000 | 1278.2917000 | 1278.2914546 |
| 1086:      | 23         | 15        | 8            | 1 24 16 9 0  |
| -0.0001923 | -0.0003000 | 0.0000000 | 1278.5582500 | 1278.5584423 |
| 1087:      | 22         | 15        | 7            | 1 23 16 8 0  |
| -0.0005554 | -0.0003000 | 0.0000000 | 1278.8247200 | 1278.8252754 |
| 1088:      | 21         | 15        | 6            | 1 22 16 7 0  |
| -0.0002011 | -0.0003000 | 0.0000000 | 1279.0917500 | 1279.0919511 |
| 1089:      | 20         | 15        | 5            | 1 21 16 6 0  |
| 0.0004236  | -0.0003000 | 0.0000000 | 1279.3588900 | 1279.3584664 |
| 1090:      | 19         | 15        | 4            | 1 20 16 5 0  |
| 0.0006613  | -0.0003000 | 0.0000000 | 1279.6254800 | 1279.6248187 |
| 1091:      | 17         | 15        | 2            | 1 18 16 3 0  |
| -0.0002335 | -0.0003000 | 0.0000000 | 1280.1567900 | 1280.1570235 |
| 1092:      | 15         | 15        | 0            | 1 16 16 1 0  |
| 0.0003656  | -0.0003000 | 0.0000000 | 1280.6889100 | 1280.6885444 |
| 1093:      | 90         | 0         | 90           | 1 91 0 91 0  |
| 0.0004636  | -0.0003000 | 0.0000000 | 1302.0415900 | 1302.0411264 |
| 1094:      | 88         | 0         | 88           | 1 89 0 89 0  |
| 0.0000724  | -0.0003000 | 0.0000000 | 1302.5670600 | 1302.5669876 |
| 1095:      | 87         | 0         | 87           | 1 88 0 88 0  |
| 0.0000817  | -0.0003000 | 0.0000000 | 1302.8298700 | 1302.8297883 |
| 1096:      | 86         | 0         | 86           | 1 87 0 87 0  |
| -0.0000404 | -0.0003000 | 0.0000000 | 1303.0924600 | 1303.0925004 |
| 1097:      | 85         | 0         | 85           | 1 86 0 86 0  |
| 0.0004273  | -0.0003000 | 0.0000000 | 1303.3555500 | 1303.3551227 |
| 1098:      | 84         | 0         | 84           | 1 85 0 85 0  |
| 0.0003863  | -0.0003000 | 0.0000000 | 1303.6180400 | 1303.6176537 |
| 1099:      | 83         | 0         | 83           | 1 84 0 84 0  |
| 0.0002978  | -0.0003000 | 0.0000000 | 1303.8803900 | 1303.8800922 |
| 1100:      | 82         | 0         | 82           | 1 83 0 83 0  |
| 0.0000533  | -0.0003000 | 0.0000000 | 1304.1424900 | 1304.1424367 |
| 1101:      | 81         | 0         | 81           | 1 82 0 82 0  |
| -0.0000659 | -0.0003000 | 0.0000000 | 1304.4046200 | 1304.4046859 |
| 1102:      | 80         | 0         | 80           | 1 81 0 81 0  |
| -0.0000384 | -0.0003000 | 0.0000000 | 1304.6668000 | 1304.6668384 |

|            |                      |              |              |
|------------|----------------------|--------------|--------------|
| 1103: 79   | 0 79 1 80 0 80 0     | 1304.9290500 | 1304.9288927 |
| 0.0001573  | -0.0003000 0.0000000 |              |              |
| 1104: 78   | 0 78 1 79 0 79 0     | 1305.1905900 | 1305.1908476 |
| -0.0002576 | -0.0003000 0.0000000 |              |              |
| 1105: 77   | 0 77 1 78 0 78 0     | 1305.4522800 | 1305.4527015 |
| -0.0004215 | -0.0003000 0.0000000 |              |              |
| 1106: 76   | 0 76 1 77 0 77 0     | 1305.7147900 | 1305.7144531 |
| 0.0003369  | -0.0003000 0.0000000 |              |              |
| 1107: 75   | 0 75 1 76 0 76 0     | 1305.9763300 | 1305.9761011 |
| 0.0002289  | -0.0003000 0.0000000 |              |              |
| 1108: 74   | 0 74 1 75 0 75 0     | 1306.2377900 | 1306.2376439 |
| 0.0001461  | -0.0003000 0.0000000 |              |              |
| 1109: 73   | 0 73 1 74 0 74 0     | 1306.4990500 | 1306.4990802 |
| -0.0000302 | -0.0003000 0.0000000 |              |              |
| 1110: 72   | 0 72 1 73 0 73 0     | 1306.7604800 | 1306.7604085 |
| 0.0000715  | -0.0003000 0.0000000 |              |              |
| 1111: 71   | 0 71 1 72 0 72 0     | 1307.0214500 | 1307.0216274 |
| -0.0001774 | -0.0003000 0.0000000 |              |              |
| 1112: 70   | 0 70 1 71 0 71 0     | 1307.2826100 | 1307.2827356 |
| -0.0001256 | -0.0003000 0.0000000 |              |              |
| 1113: 69   | 0 69 1 70 0 70 0     | 1307.5436300 | 1307.5437314 |
| -0.0001014 | -0.0003000 0.0000000 |              |              |
| 1114: 68   | 0 68 1 69 0 69 0     | 1307.8044800 | 1307.8046135 |
| -0.0001335 | -0.0003000 0.0000000 |              |              |
| 1115: 67   | 0 67 1 68 0 68 0     | 1308.0654100 | 1308.0653804 |
| 0.0000296  | -0.0003000 0.0000000 |              |              |
| 1116: 66   | 0 66 1 67 0 67 0     | 1308.3261400 | 1308.3260306 |
| 0.0001094  | -0.0003000 0.0000000 |              |              |
| 1117: 65   | 0 65 1 66 0 66 0     | 1308.5867900 | 1308.5865627 |
| 0.0002273  | -0.0003000 0.0000000 |              |              |
| 1118: 64   | 0 64 1 65 0 65 0     | 1308.8470100 | 1308.8469750 |
| 0.0000350  | -0.0003000 0.0000000 |              |              |
| 1119: 63   | 0 63 1 64 0 64 0     | 1309.1072300 | 1309.1072661 |
| -0.0000361 | -0.0003000 0.0000000 |              |              |
| 1120: 62   | 0 62 1 63 0 63 0     | 1309.3675500 | 1309.3674343 |
| 0.0001157  | -0.0003000 0.0000000 |              |              |
| 1121: 61   | 0 61 1 62 0 62 0     | 1309.6275800 | 1309.6274782 |
| 0.0001018  | -0.0003000 0.0000000 |              |              |
| 1122: 60   | 0 60 1 61 0 61 0     | 1309.8872700 | 1309.8873961 |
| -0.0001261 | -0.0003000 0.0000000 |              |              |
| 1123: 59   | 0 59 1 60 0 60 0     | 1310.1472200 | 1310.1471863 |
| 0.0000337  | -0.0003000 0.0000000 |              |              |
| 1124: 58   | 0 58 1 59 0 59 0     | 1310.4068300 | 1310.4068472 |
| -0.0000172 | -0.0003000 0.0000000 |              |              |
| 1125: 57   | 0 57 1 58 0 58 0     | 1310.6661100 | 1310.6663770 |
| -0.0002670 | -0.0003000 0.0000000 |              |              |
| 1126: 56   | 0 56 1 57 0 57 0     | 1310.9259200 | 1310.9257738 |
| 0.0001462  | -0.0003000 0.0000000 |              |              |
| 1127: 55   | 0 55 1 56 0 56 0     | 1311.1851500 | 1311.1850359 |
| 0.0001141  | -0.0003000 0.0000000 |              |              |
| 1128: 54   | 0 54 1 55 0 55 0     | 1311.4444700 | 1311.4441613 |
| 0.0003087  | -0.0003000 0.0000000 |              |              |
| 1129: 53   | 0 53 1 54 0 54 0     | 1311.7029900 | 1311.7031479 |
| -0.0001579 | -0.0003000 0.0000000 |              |              |
| 1130: 52   | 0 52 1 53 0 53 0     | 1311.9617400 | 1311.9619937 |
| -0.0002537 | -0.0003000 0.0000000 |              |              |
| 1131: 51   | 0 51 1 52 0 52 0     | 1312.2206100 | 1312.2206963 |
| -0.0000863 | -0.0003000 0.0000000 |              |              |
| 1132: 50   | 0 50 1 51 0 51 0     | 1312.4794300 | 1312.4792534 |
| 0.0001766  | -0.0003000 0.0000000 |              |              |
| 1133: 49   | 0 49 1 50 0 50 0     | 1312.7377100 | 1312.7376625 |
| 0.0000475  | -0.0003000 0.0000000 |              |              |
| 1134: 48   | 0 48 1 49 0 49 0     | 1312.9960800 | 1312.9959207 |
| 0.0001593  | -0.0003000 0.0000000 |              |              |
| 1135: 47   | 0 47 1 48 0 48 0     | 1313.2542200 | 1313.2540253 |

|            |            |           |              |              |
|------------|------------|-----------|--------------|--------------|
| 0.0001947  | -0.0003000 | 0.0000000 |              |              |
| 1136: 46   | 0 46       | 1 47      | 0 47         | 0            |
| 0.0000369  | -0.0003000 | 0.0000000 | 1313.5120100 | 1313.5119731 |
| 1137: 45   | 0 45       | 1 46      | 0 46         | 0            |
| 0.0004994  | -0.0003000 | 0.0000000 | 1313.7702600 | 1313.7697606 |
| 1138: 44   | 0 44       | 1 45      | 0 45         | 0            |
| 0.0004558  | -0.0003000 | 0.0000000 | 1314.0278400 | 1314.0273842 |
| 1139: 43   | 0 43       | 1 44      | 0 44         | 0            |
| 0.0006602  | -0.0003000 | 0.0000000 | 1314.2855000 | 1314.2848398 |
| 1140: 38   | 0 38       | 1 39      | 0 39         | 0            |
| 0.0003459  | -0.0003000 | 0.0000000 | 1315.5697800 | 1315.5694341 |
| 1141: 37   | 0 37       | 1 38      | 0 38         | 0            |
| 0.0000423  | -0.0003000 | 0.0000000 | 1315.8258200 | 1315.8257777 |
| 1142: 36   | 0 36       | 1 37      | 0 37         | 0            |
| 0.0000151  | -0.0003000 | 0.0000000 | 1316.0819300 | 1316.0819149 |
| 1143: 35   | 0 35       | 1 36      | 0 36         | 0            |
| -0.0000090 | -0.0003000 | 0.0000000 | 1316.3378300 | 1316.3378390 |
| 1144: 34   | 0 34       | 1 35      | 0 35         | 0            |
| -0.0001332 | -0.0003000 | 0.0000000 | 1316.5934100 | 1316.5935432 |
| 1145: 33   | 0 33       | 1 34      | 0 34         | 0            |
| -0.0007007 | -0.0003000 | 0.0000000 | 1316.8483200 | 1316.8490207 |
| 1146: 32   | 0 32       | 1 33      | 0 33         | 0            |
| 0.0000746  | -0.0003000 | 0.0000000 | 1317.1043400 | 1317.1042654 |
| 1147: 31   | 0 31       | 1 32      | 0 32         | 0            |
| -0.0001421 | -0.0003000 | 0.0000000 | 1317.3591300 | 1317.3592721 |
| 1148: 30   | 0 30       | 1 31      | 0 31         | 0            |
| -0.0000871 | -0.0003000 | 0.0000000 | 1317.6139500 | 1317.6140371 |
| 1149: 29   | 0 29       | 1 30      | 0 30         | 0            |
| 0.0002408  | -0.0003000 | 0.0000000 | 1317.8688000 | 1317.8685592 |
| 1150: 28   | 0 28       | 1 29      | 0 29         | 0            |
| 0.0002696  | -0.0003000 | 0.0000000 | 1318.1231100 | 1318.1228404 |
| 1151: 27   | 0 27       | 1 28      | 0 28         | 0            |
| 0.0003130  | -0.0003000 | 0.0000000 | 1318.3772000 | 1318.3768870 |
| 1152: 26   | 0 26       | 1 27      | 0 27         | 0            |
| -0.0001111 | -0.0003000 | 0.0000000 | 1318.6306000 | 1318.6307111 |
| 1153: 25   | 0 25       | 1 26      | 0 26         | 0            |
| 0.0000080  | -0.0003000 | 0.0000000 | 1318.8843400 | 1318.8843320 |
| 1154: 24   | 0 24       | 1 25      | 0 25         | 0            |
| -0.0001476 | -0.0003000 | 0.0000000 | 1319.1376300 | 1319.1377776 |
| 1155: 23   | 0 23       | 1 24      | 0 24         | 0            |
| -0.0000958 | -0.0003000 | 0.0000000 | 1319.3909900 | 1319.3910858 |
| 1156: 22   | 0 22       | 1 23      | 0 23         | 0            |
| 0.0003449  | -0.0003000 | 0.0000000 | 1319.6446500 | 1319.6443051 |
| 1157: 21   | 0 21       | 1 22      | 0 22         | 0            |
| 0.0000241  | -0.0003000 | 0.0000000 | 1319.8975200 | 1319.8974959 |
| 1158: 20   | 0 20       | 1 21      | 0 21         | 0            |
| -0.0000693 | -0.0003000 | 0.0000000 | 1320.1506600 | 1320.1507293 |
| 1159: 19   | 0 19       | 1 20      | 0 20         | 0            |
| -0.0002160 | -0.0003000 | 0.0000000 | 1320.4038700 | 1320.4040860 |
| 1160: 18   | 0 18       | 1 19      | 0 19         | 0            |
| 0.0000858  | -0.0003000 | 0.0000000 | 1320.6577400 | 1320.6576542 |
| 1161: 17   | 0 17       | 1 18      | 0 18         | 0            |
| 0.0000444  | -0.0003000 | 0.0000000 | 1320.9115700 | 1320.9115256 |
| 1162: 16   | 0 16       | 1 17      | 0 17         | 0            |
| 0.0000088  | -0.0003000 | 0.0000000 | 1321.1658000 | 1321.1657912 |
| 1163: 15   | 0 15       | 1 16      | 0 16         | 0            |
| -0.0000467 | -0.0003000 | 0.0000000 | 1321.4204900 | 1321.4205367 |
| 1164: 14   | 0 14       | 1 15      | 0 15         | 0            |
| 0.0000427  | -0.0003000 | 0.0000000 | 1321.6758800 | 1321.6758373 |
| 1165: 13   | 0 13       | 1 14      | 0 14         | 0            |
| 0.0000460  | -0.0003000 | 0.0000000 | 1321.9318000 | 1321.9317540 |
| 1166: 12   | 0 12       | 1 13      | 0 13         | 0            |
| 0.0000697  | -0.0003000 | 0.0000000 | 1322.1884000 | 1322.1883303 |
| 1167: 11   | 0 11       | 1 12      | 0 12         | 0            |
| -0.0000704 | -0.0003000 | 0.0000000 | 1322.4455200 | 1322.4455904 |

|       |            |            |           |   |    |   |    |   |              |              |
|-------|------------|------------|-----------|---|----|---|----|---|--------------|--------------|
| 1168: | 10         | 0          | 10        | 1 | 11 | 0 | 11 | 0 | 1322.7036900 | 1322.7035389 |
|       | 0.0001511  | -0.0003000 | 0.0000000 |   |    |   |    |   |              |              |
| 1169: | 9          | 0          | 9         | 1 | 10 | 0 | 10 | 0 | 1322.9623000 | 1322.9621616 |
|       | 0.0001384  | -0.0003000 | 0.0000000 |   |    |   |    |   |              |              |
| 1170: | 8          | 0          | 8         | 1 | 9  | 0 | 9  | 0 | 1323.2215300 | 1323.2214271 |
|       | 0.0001029  | -0.0003000 | 0.0000000 |   |    |   |    |   |              |              |
| 1171: | 7          | 0          | 7         | 1 | 8  | 0 | 8  | 0 | 1323.4811900 | 1323.4812891 |
|       | -0.0000991 | -0.0003000 | 0.0000000 |   |    |   |    |   |              |              |
| 1172: | 6          | 0          | 6         | 1 | 7  | 0 | 7  | 0 | 1323.7417100 | 1323.7416890 |
|       | 0.0000210  | -0.0003000 | 0.0000000 |   |    |   |    |   |              |              |
| 1173: | 5          | 0          | 5         | 1 | 6  | 0 | 6  | 0 | 1324.0024000 | 1324.0025588 |
|       | -0.0001588 | -0.0003000 | 0.0000000 |   |    |   |    |   |              |              |
| 1174: | 4          | 0          | 4         | 1 | 5  | 0 | 5  | 0 | 1324.2635300 | 1324.2638225 |
|       | -0.0002925 | -0.0003000 | 0.0000000 |   |    |   |    |   |              |              |
| 1175: | 3          | 0          | 3         | 1 | 4  | 0 | 4  | 0 | 1324.5256200 | 1324.5253988 |
|       | 0.0002212  | -0.0003000 | 0.0000000 |   |    |   |    |   |              |              |
| 1176: | 2          | 0          | 2         | 1 | 3  | 0 | 3  | 0 | 1324.7873000 | 1324.7872021 |
|       | 0.0000979  | -0.0003000 | 0.0000000 |   |    |   |    |   |              |              |
| 1177: | 1          | 0          | 1         | 1 | 2  | 0 | 2  | 0 | 1325.0492800 | 1325.0491436 |
|       | 0.0001364  | -0.0003000 | 0.0000000 |   |    |   |    |   |              |              |
| 1178: | 2          | 0          | 2         | 1 | 1  | 0 | 1  | 0 | 1326.0967500 | 1326.0964337 |
|       | 0.0003163  | -0.0003000 | 0.0000000 |   |    |   |    |   |              |              |
| 1179: | 3          | 0          | 3         | 1 | 2  | 0 | 2  | 0 | 1326.3575700 | 1326.3576554 |
|       | -0.0000854 | -0.0003000 | 0.0000000 |   |    |   |    |   |              |              |
| 1180: | 4          | 0          | 4         | 1 | 3  | 0 | 3  | 0 | 1326.6185100 | 1326.6184373 |
|       | 0.0000727  | -0.0003000 | 0.0000000 |   |    |   |    |   |              |              |
| 1181: | 5          | 0          | 5         | 1 | 4  | 0 | 4  | 0 | 1326.8785700 | 1326.8786775 |
|       | -0.0001075 | -0.0003000 | 0.0000000 |   |    |   |    |   |              |              |
| 1182: | 6          | 0          | 6         | 1 | 5  | 0 | 5  | 0 | 1327.1383900 | 1327.1382729 |
|       | 0.0001171  | -0.0003000 | 0.0000000 |   |    |   |    |   |              |              |
| 1183: | 7          | 0          | 7         | 1 | 6  | 0 | 6  | 0 | 1327.3970300 | 1327.3971216 |
|       | -0.0000916 | -0.0003000 | 0.0000000 |   |    |   |    |   |              |              |
| 1184: | 8          | 0          | 8         | 1 | 7  | 0 | 7  | 0 | 1327.6552700 | 1327.6551237 |
|       | 0.0001463  | -0.0003000 | 0.0000000 |   |    |   |    |   |              |              |
| 1185: | 9          | 0          | 9         | 1 | 8  | 0 | 8  | 0 | 1327.9121300 | 1327.9121844 |
|       | -0.0000544 | -0.0003000 | 0.0000000 |   |    |   |    |   |              |              |
| 1186: | 10         | 0          | 10        | 1 | 9  | 0 | 9  | 0 | 1328.1681900 | 1328.1682163 |
|       | -0.0000263 | -0.0003000 | 0.0000000 |   |    |   |    |   |              |              |
| 1187: | 11         | 0          | 11        | 1 | 10 | 0 | 10 | 0 | 1328.4231600 | 1328.4231434 |
|       | 0.0000166  | -0.0003000 | 0.0000000 |   |    |   |    |   |              |              |
| 1188: | 12         | 0          | 12        | 1 | 11 | 0 | 11 | 0 | 1328.6768600 | 1328.6769043 |
|       | -0.0000443 | -0.0003000 | 0.0000000 |   |    |   |    |   |              |              |
| 1189: | 13         | 0          | 13        | 1 | 12 | 0 | 12 | 0 | 1328.9294900 | 1328.9294561 |
|       | 0.0000339  | -0.0003000 | 0.0000000 |   |    |   |    |   |              |              |
| 1190: | 14         | 0          | 14        | 1 | 13 | 0 | 13 | 0 | 1329.1807100 | 1329.1807779 |
|       | -0.0000679 | -0.0003000 | 0.0000000 |   |    |   |    |   |              |              |
| 1191: | 15         | 0          | 15        | 1 | 14 | 0 | 14 | 0 | 1329.4311300 | 1329.4308723 |
|       | 0.0002577  | -0.0003000 | 0.0000000 |   |    |   |    |   |              |              |
| 1192: | 16         | 0          | 16        | 1 | 15 | 0 | 15 | 0 | 1329.6799200 | 1329.6797667 |
|       | 0.0001533  | -0.0003000 | 0.0000000 |   |    |   |    |   |              |              |
| 1193: | 17         | 0          | 17        | 1 | 16 | 0 | 16 | 0 | 1329.9276000 | 1329.9275124 |
|       | 0.0000876  | -0.0003000 | 0.0000000 |   |    |   |    |   |              |              |
| 1194: | 18         | 0          | 18        | 1 | 17 | 0 | 17 | 0 | 1330.1744400 | 1330.1741817 |
|       | 0.0002583  | -0.0003000 | 0.0000000 |   |    |   |    |   |              |              |
| 1195: | 19         | 0          | 19        | 1 | 18 | 0 | 18 | 0 | 1330.4200200 | 1330.4198639 |
|       | 0.0001561  | -0.0003000 | 0.0000000 |   |    |   |    |   |              |              |
| 1196: | 20         | 0          | 20        | 1 | 19 | 0 | 19 | 0 | 1330.6647300 | 1330.6646596 |
|       | 0.0000704  | -0.0003000 | 0.0000000 |   |    |   |    |   |              |              |
| 1197: | 21         | 0          | 21        | 1 | 20 | 0 | 20 | 0 | 1330.9085800 | 1330.9086749 |
|       | -0.0000949 | -0.0003000 | 0.0000000 |   |    |   |    |   |              |              |
| 1198: | 22         | 0          | 22        | 1 | 21 | 0 | 21 | 0 | 1331.1520800 | 1331.1520159 |
|       | 0.0000641  | -0.0003000 | 0.0000000 |   |    |   |    |   |              |              |
| 1199: | 23         | 0          | 23        | 1 | 22 | 0 | 22 | 0 | 1331.3948800 | 1331.3947833 |
|       | 0.0000967  | -0.0003000 | 0.0000000 |   |    |   |    |   |              |              |
| 1200: | 24         | 0          | 24        | 1 | 23 | 0 | 23 | 0 | 1331.6366000 | 1331.6370690 |

|            |            |           |      |                             |
|------------|------------|-----------|------|-----------------------------|
| -0.0004690 | -0.0003000 | 0.0000000 |      |                             |
| 1201: 25   | 0 25       | 1 24      | 0 24 | 0 1331.8789500 1331.8789530 |
| -0.0000030 | -0.0003000 | 0.0000000 |      |                             |
| 1202: 26   | 0 26       | 1 25      | 0 25 | 0 1332.1204300 1332.1205027 |
| -0.0000727 | -0.0003000 | 0.0000000 |      |                             |
| 1203: 27   | 0 27       | 1 26      | 0 26 | 0 1332.3619300 1332.3617722 |
| 0.0001578  | -0.0003000 | 0.0000000 |      |                             |
| 1204: 28   | 0 28       | 1 27      | 0 27 | 0 1332.6030100 1332.6028034 |
| 0.0002066  | -0.0003000 | 0.0000000 |      |                             |
| 1205: 29   | 0 29       | 1 28      | 0 28 | 0 1332.8437500 1332.8436271 |
| 0.0001229  | -0.0003000 | 0.0000000 |      |                             |
| 1206: 30   | 0 30       | 1 29      | 0 29 | 0 1333.0843800 1333.0842643 |
| 0.0001157  | -0.0003000 | 0.0000000 |      |                             |
| 1207: 31   | 0 31       | 1 30      | 0 30 | 0 1333.3247700 1333.3247282 |
| 0.0000418  | -0.0003000 | 0.0000000 |      |                             |
| 1208: 32   | 0 32       | 1 31      | 0 31 | 0 1333.5649600 1333.5650253 |
| -0.0000653 | -0.0003000 | 0.0000000 |      |                             |
| 1209: 33   | 0 33       | 1 32      | 0 32 | 0 1333.8054000 1333.8051576 |
| 0.0002424  | -0.0003000 | 0.0000000 |      |                             |
| 1210: 34   | 0 34       | 1 33      | 0 33 | 0 1334.0452900 1334.0451229 |
| 0.0001671  | -0.0003000 | 0.0000000 |      |                             |
| 1211: 35   | 0 35       | 1 34      | 0 34 | 0 1334.2846700 1334.2849166 |
| -0.0002466 | -0.0003000 | 0.0000000 |      |                             |
| 1212: 36   | 0 36       | 1 35      | 0 35 | 0 1334.5245300 1334.5245323 |
| -0.0000023 | -0.0003000 | 0.0000000 |      |                             |
| 1213: 37   | 0 37       | 1 36      | 0 36 | 0 1334.7641300 1334.7639624 |
| 0.0001676  | -0.0003000 | 0.0000000 |      |                             |
| 1214: 38   | 0 38       | 1 37      | 0 37 | 0 1335.0032100 1335.0031985 |
| 0.0000115  | -0.0003000 | 0.0000000 |      |                             |
| 1215: 39   | 0 39       | 1 38      | 0 38 | 0 1335.2423000 1335.2422322 |
| 0.0000678  | -0.0003000 | 0.0000000 |      |                             |
| 1216: 40   | 0 40       | 1 39      | 0 39 | 0 1335.4810400 1335.4810550 |
| -0.0000150 | -0.0003000 | 0.0000000 |      |                             |
| 1217: 41   | 0 41       | 1 40      | 0 40 | 0 1335.7197300 1335.7196587 |
| 0.0000713  | -0.0003000 | 0.0000000 |      |                             |
| 1218: 42   | 0 42       | 1 41      | 0 41 | 0 1335.9579500 1335.9580352 |
| -0.0000852 | -0.0003000 | 0.0000000 |      |                             |
| 1219: 43   | 0 43       | 1 42      | 0 42 | 0 1336.1956400 1336.1961772 |
| -0.0005372 | -0.0003000 | 0.0000000 |      |                             |
| 1220: 44   | 0 44       | 1 43      | 0 43 | 0 1336.4337500 1336.4340775 |
| -0.0003275 | -0.0003000 | 0.0000000 |      |                             |
| 1221: 49   | 0 49       | 1 48      | 0 48 | 0 1337.6190400 1337.6197417 |
| -0.0007017 | -0.0003000 | 0.0000000 |      |                             |
| 1222: 50   | 0 50       | 1 49      | 0 49 | 0 1337.8554700 1337.8560705 |
| -0.0006005 | -0.0003000 | 0.0000000 |      |                             |
| 1223: 51   | 0 51       | 1 50      | 0 50 | 0 1338.0918300 1338.0921208 |
| -0.0002908 | -0.0003000 | 0.0000000 |      |                             |
| 1224: 52   | 0 52       | 1 51      | 0 51 | 0 1338.3274800 1338.3278890 |
| -0.0004090 | -0.0003000 | 0.0000000 |      |                             |
| 1225: 53   | 0 53       | 1 52      | 0 52 | 0 1338.5631400 1338.5633715 |
| -0.0002315 | -0.0003000 | 0.0000000 |      |                             |
| 1226: 54   | 0 54       | 1 53      | 0 53 | 0 1338.7983300 1338.7985650 |
| -0.0002350 | -0.0003000 | 0.0000000 |      |                             |
| 1227: 55   | 0 55       | 1 54      | 0 54 | 0 1339.0331900 1339.0334664 |
| -0.0002764 | -0.0003000 | 0.0000000 |      |                             |
| 1228: 56   | 0 56       | 1 55      | 0 55 | 0 1339.2677700 1339.2680730 |
| -0.0003030 | -0.0003000 | 0.0000000 |      |                             |
| 1229: 57   | 0 57       | 1 56      | 0 56 | 0 1339.5022200 1339.5023819 |
| -0.0001619 | -0.0003000 | 0.0000000 |      |                             |
| 1230: 58   | 0 58       | 1 57      | 0 57 | 0 1339.7361000 1339.7363907 |
| -0.0002907 | -0.0003000 | 0.0000000 |      |                             |
| 1231: 59   | 0 59       | 1 58      | 0 58 | 0 1339.9698300 1339.9700968 |
| -0.0002668 | -0.0003000 | 0.0000000 |      |                             |
| 1232: 60   | 0 60       | 1 59      | 0 59 | 0 1340.2033700 1340.2034980 |
| -0.0001280 | -0.0003000 | 0.0000000 |      |                             |

|            |            |           |      |   |              |              |
|------------|------------|-----------|------|---|--------------|--------------|
| 1233: 61   | 0 61       | 1 60      | 0 60 | 0 | 1340.4364700 | 1340.4365922 |
| -0.0001222 | -0.0003000 | 0.0000000 |      |   |              |              |
| 1234: 62   | 0 62       | 1 61      | 0 61 | 0 | 1340.6694900 | 1340.6693770 |
| 0.0001130  | -0.0003000 | 0.0000000 |      |   |              |              |
| 1235: 63   | 0 63       | 1 62      | 0 62 | 0 | 1340.9018200 | 1340.9018505 |
| -0.0000305 | -0.0003000 | 0.0000000 |      |   |              |              |
| 1236: 64   | 0 64       | 1 63      | 0 63 | 0 | 1341.1340100 | 1341.1340107 |
| -0.0000007 | -0.0003000 | 0.0000000 |      |   |              |              |
| 1237: 65   | 0 65       | 1 64      | 0 64 | 0 | 1341.3659300 | 1341.3658556 |
| 0.0000744  | -0.0003000 | 0.0000000 |      |   |              |              |
| 1238: 66   | 0 66       | 1 65      | 0 65 | 0 | 1341.5974300 | 1341.5973834 |
| 0.0000466  | -0.0003000 | 0.0000000 |      |   |              |              |
| 1239: 67   | 0 67       | 1 66      | 0 66 | 0 | 1341.8285800 | 1341.8285922 |
| -0.0000122 | -0.0003000 | 0.0000000 |      |   |              |              |
| 1240: 68   | 0 68       | 1 67      | 0 67 | 0 | 1342.0594900 | 1342.0594802 |
| 0.0000098  | -0.0003000 | 0.0000000 |      |   |              |              |
| 1241: 69   | 0 69       | 1 68      | 0 68 | 0 | 1342.2900100 | 1342.2900456 |
| -0.0000356 | -0.0003000 | 0.0000000 |      |   |              |              |
| 1242: 70   | 0 70       | 1 69      | 0 69 | 0 | 1342.5204100 | 1342.5202867 |
| 0.0001233  | -0.0003000 | 0.0000000 |      |   |              |              |
| 1243: 71   | 0 71       | 1 70      | 0 70 | 0 | 1342.7503500 | 1342.7502017 |
| 0.0001483  | -0.0003000 | 0.0000000 |      |   |              |              |
| 1244: 72   | 0 72       | 1 71      | 0 71 | 0 | 1342.9798500 | 1342.9797888 |
| 0.0000612  | -0.0003000 | 0.0000000 |      |   |              |              |
| 1245: 73   | 0 73       | 1 72      | 0 72 | 0 | 1343.2090500 | 1343.2090466 |
| 0.0000034  | -0.0003000 | 0.0000000 |      |   |              |              |
| 1246: 74   | 0 74       | 1 73      | 0 73 | 0 | 1343.4380500 | 1343.4379731 |
| 0.0000769  | -0.0003000 | 0.0000000 |      |   |              |              |
| 1247: 75   | 0 75       | 1 74      | 0 74 | 0 | 1343.6665000 | 1343.6665668 |
| -0.0000668 | -0.0003000 | 0.0000000 |      |   |              |              |
| 1248: 76   | 0 76       | 1 75      | 0 75 | 0 | 1343.8949200 | 1343.8948261 |
| 0.0000939  | -0.0003000 | 0.0000000 |      |   |              |              |
| 1249: 77   | 0 77       | 1 76      | 0 76 | 0 | 1344.1226900 | 1344.1227492 |
| -0.0000592 | -0.0003000 | 0.0000000 |      |   |              |              |
| 1250: 78   | 0 78       | 1 77      | 0 77 | 0 | 1344.3504100 | 1344.3503345 |
| 0.0000755  | -0.0003000 | 0.0000000 |      |   |              |              |
| 1251: 79   | 0 79       | 1 78      | 0 78 | 0 | 1344.5776400 | 1344.5775804 |
| 0.0000596  | -0.0003000 | 0.0000000 |      |   |              |              |
| 1252: 80   | 0 80       | 1 79      | 0 79 | 0 | 1344.8046400 | 1344.8044853 |
| 0.0001547  | -0.0003000 | 0.0000000 |      |   |              |              |
| 1253: 81   | 0 81       | 1 80      | 0 80 | 0 | 1345.0312100 | 1345.0310475 |
| 0.0001625  | -0.0003000 | 0.0000000 |      |   |              |              |
| 1254: 82   | 0 82       | 1 81      | 0 81 | 0 | 1345.2572100 | 1345.2572655 |
| -0.0000555 | -0.0003000 | 0.0000000 |      |   |              |              |
| 1255: 83   | 0 83       | 1 82      | 0 82 | 0 | 1345.4830700 | 1345.4831376 |
| -0.0000676 | -0.0003000 | 0.0000000 |      |   |              |              |
| 1256: 84   | 0 84       | 1 83      | 0 83 | 0 | 1345.7088100 | 1345.7086622 |
| 0.0001478  | -0.0003000 | 0.0000000 |      |   |              |              |
| 1257: 85   | 0 85       | 1 84      | 0 84 | 0 | 1345.9340100 | 1345.9338377 |
| 0.0001723  | -0.0003000 | 0.0000000 |      |   |              |              |
| 1258: 86   | 0 86       | 1 85      | 0 85 | 0 | 1346.1585700 | 1346.1586625 |
| -0.0000925 | -0.0003000 | 0.0000000 |      |   |              |              |
| 1259: 87   | 0 87       | 1 86      | 0 86 | 0 | 1346.3829800 | 1346.3831351 |
| -0.0001551 | -0.0003000 | 0.0000000 |      |   |              |              |
| 1260: 88   | 0 88       | 1 87      | 0 87 | 0 | 1346.6070300 | 1346.6072537 |
| -0.0002237 | -0.0003000 | 0.0000000 |      |   |              |              |
| 1261: 89   | 0 89       | 1 88      | 0 88 | 0 | 1346.8309900 | 1346.8310168 |
| -0.0000268 | -0.0003000 | 0.0000000 |      |   |              |              |
| 1262: 90   | 0 90       | 1 89      | 0 89 | 0 | 1347.0545100 | 1347.0544229 |
| 0.0000871  | -0.0003000 | 0.0000000 |      |   |              |              |
| 1263: 91   | 0 91       | 1 90      | 0 90 | 0 | 1347.2775500 | 1347.2774702 |
| 0.0000798  | -0.0003000 | 0.0000000 |      |   |              |              |
| 1264: 92   | 0 92       | 1 91      | 0 91 | 0 | 1347.4999300 | 1347.5001573 |
| -0.0002273 | -0.0003000 | 0.0000000 |      |   |              |              |
| 1265: 93   | 0 93       | 1 92      | 0 92 | 0 | 1347.7227600 | 1347.7224825 |

|            |            |           |              |              |
|------------|------------|-----------|--------------|--------------|
| 0.0002775  | -0.0003000 | 0.0000000 |              |              |
| 1266: 94   | 0 94       | 1 93      | 0 93         | 0            |
| 0.0000057  | -0.0003000 | 0.0000000 | 1347.9444500 | 1347.9444443 |
| 1267: 95   | 0 95       | 1 94      | 0 94         | 0            |
| -0.0001110 | -0.0003000 | 0.0000000 | 1348.1659300 | 1348.1660410 |
| 1268: 96   | 0 96       | 1 95      | 0 95         | 0            |
| -0.0001510 | -0.0003000 | 0.0000000 | 1348.3871200 | 1348.3872710 |
| 1269: 97   | 0 97       | 1 96      | 0 96         | 0            |
| 0.0002771  | -0.0003000 | 0.0000000 | 1348.6084100 | 1348.6081329 |
| 1270: 98   | 0 98       | 1 97      | 0 97         | 0            |
| 0.0001651  | -0.0003000 | 0.0000000 | 1348.8287900 | 1348.8286249 |
| 1271: 98   | 1 97       | 1 99      | 1 98         | 0            |
| 0.0001778  | -0.0003000 | 0.0000000 | 1299.6726500 | 1299.6724722 |
| 1272: 97   | 1 96       | 1 98      | 1 97         | 0            |
| -0.0005365 | -0.0003000 | 0.0000000 | 1299.9356700 | 1299.9362065 |
| 1273: 96   | 1 95       | 1 97      | 1 96         | 0            |
| 0.0003528  | -0.0003000 | 0.0000000 | 1300.2002200 | 1300.1998672 |
| 1274: 95   | 1 94       | 1 96      | 1 95         | 0            |
| 0.0004770  | -0.0003000 | 0.0000000 | 1300.4639300 | 1300.4634530 |
| 1275: 94   | 1 93       | 1 95      | 1 94         | 0            |
| -0.0000825 | -0.0003000 | 0.0000000 | 1300.7268800 | 1300.7269625 |
| 1276: 93   | 1 92       | 1 94      | 1 93         | 0            |
| -0.0001443 | -0.0003000 | 0.0000000 | 1300.9902500 | 1300.9903943 |
| 1277: 92   | 1 91       | 1 93      | 1 92         | 0            |
| -0.0002770 | -0.0003000 | 0.0000000 | 1301.2534700 | 1301.2537470 |
| 1278: 87   | 1 86       | 1 88      | 1 87         | 0            |
| -0.0001341 | -0.0003000 | 0.0000000 | 1302.5691400 | 1302.5692741 |
| 1279: 85   | 1 84       | 1 86      | 1 85         | 0            |
| -0.0000610 | -0.0003000 | 0.0000000 | 1303.0948200 | 1303.0948810 |
| 1280: 84   | 1 83       | 1 85      | 1 84         | 0            |
| -0.0004291 | -0.0003000 | 0.0000000 | 1303.3571200 | 1303.3575491 |
| 1281: 83   | 1 82       | 1 84      | 1 83         | 0            |
| -0.0002049 | -0.0003000 | 0.0000000 | 1303.6199200 | 1303.6201249 |
| 1282: 82   | 1 81       | 1 83      | 1 82         | 0            |
| -0.0004768 | -0.0003000 | 0.0000000 | 1303.8821300 | 1303.8826068 |
| 1283: 81   | 1 80       | 1 82      | 1 81         | 0            |
| -0.0002634 | -0.0003000 | 0.0000000 | 1304.1447300 | 1304.1449934 |
| 1284: 80   | 1 79       | 1 81      | 1 80         | 0            |
| 0.0002872  | -0.0003000 | 0.0000000 | 1304.4075700 | 1304.4072828 |
| 1285: 79   | 1 78       | 1 80      | 1 79         | 0            |
| -0.0002035 | -0.0003000 | 0.0000000 | 1304.6692700 | 1304.6694735 |
| 1286: 78   | 1 77       | 1 79      | 1 78         | 0            |
| -0.0002537 | -0.0003000 | 0.0000000 | 1304.9313100 | 1304.9315637 |
| 1287: 77   | 1 76       | 1 78      | 1 77         | 0            |
| -0.0003618 | -0.0003000 | 0.0000000 | 1305.1931900 | 1305.1935518 |
| 1288: 76   | 1 75       | 1 77      | 1 76         | 0            |
| 0.0002643  | -0.0003000 | 0.0000000 | 1305.4557000 | 1305.4554357 |
| 1289: 74   | 1 73       | 1 75      | 1 74         | 0            |
| -0.0000638 | -0.0003000 | 0.0000000 | 1305.9788200 | 1305.9788838 |
| 1290: 73   | 1 72       | 1 74      | 1 73         | 0            |
| 0.0001160  | -0.0003000 | 0.0000000 | 1306.2405600 | 1306.2404440 |
| 1291: 72   | 1 71       | 1 73      | 1 72         | 0            |
| 0.0002181  | -0.0003000 | 0.0000000 | 1306.5021100 | 1306.5018919 |
| 1292: 71   | 1 70       | 1 72      | 1 71         | 0            |
| 0.0003446  | -0.0003000 | 0.0000000 | 1306.7635700 | 1306.7632254 |
| 1293: 70   | 1 69       | 1 71      | 1 70         | 0            |
| 0.0000479  | -0.0003000 | 0.0000000 | 1307.0244900 | 1307.0244421 |
| 1294: 69   | 1 68       | 1 70      | 1 69         | 0            |
| 0.0002607  | -0.0003000 | 0.0000000 | 1307.2858000 | 1307.2855393 |
| 1295: 58   | 1 57       | 1 59      | 1 58         | 0            |
| -0.0005440 | -0.0003000 | 0.0000000 | 1310.1482200 | 1310.1487640 |
| 1296: 57   | 1 56       | 1 58      | 1 57         | 0            |
| -0.0000971 | -0.0003000 | 0.0000000 | 1310.4080400 | 1310.4081371 |
| 1297: 56   | 1 55       | 1 57      | 1 56         | 0            |
| -0.0002213 | -0.0003000 | 0.0000000 | 1310.6671100 | 1310.6673313 |

|            |            |           |      |   |              |              |
|------------|------------|-----------|------|---|--------------|--------------|
| 1298: 55   | 1 54       | 1 56      | 1 55 | 0 | 1310.9263500 | 1310.9263393 |
| 0.0000107  | -0.0003000 | 0.0000000 |      |   |              |              |
| 1299: 54   | 1 53       | 1 55      | 1 54 | 0 | 1311.1853300 | 1311.1851529 |
| 0.0001771  | -0.0003000 | 0.0000000 |      |   |              |              |
| 1300: 53   | 1 52       | 1 54      | 1 53 | 0 | 1311.4444400 | 1311.4437640 |
| 0.0006760  | -0.0003000 | 0.0000000 |      |   |              |              |
| 1301: 52   | 1 51       | 1 53      | 1 52 | 0 | 1311.7021900 | 1311.7021639 |
| 0.0000261  | -0.0003000 | 0.0000000 |      |   |              |              |
| 1302: 51   | 1 50       | 1 52      | 1 51 | 0 | 1311.9607900 | 1311.9603438 |
| 0.0004462  | -0.0003000 | 0.0000000 |      |   |              |              |
| 1303: 50   | 1 49       | 1 51      | 1 50 | 0 | 1312.2185600 | 1312.2182952 |
| 0.0002648  | -0.0003000 | 0.0000000 |      |   |              |              |
| 1304: 49   | 1 48       | 1 50      | 1 49 | 0 | 1312.4759900 | 1312.4760101 |
| -0.0000201 | -0.0003000 | 0.0000000 |      |   |              |              |
| 1305: 48   | 1 47       | 1 49      | 1 48 | 0 | 1312.7336500 | 1312.7334811 |
| 0.0001689  | -0.0003000 | 0.0000000 |      |   |              |              |
| 1306: 47   | 1 46       | 1 48      | 1 47 | 0 | 1312.9905300 | 1312.9907024 |
| -0.0001724 | -0.0003000 | 0.0000000 |      |   |              |              |
| 1307: 46   | 1 45       | 1 47      | 1 46 | 0 | 1313.2475100 | 1313.2476703 |
| -0.0001603 | -0.0003000 | 0.0000000 |      |   |              |              |
| 1308: 45   | 1 44       | 1 46      | 1 45 | 0 | 1313.5045000 | 1313.5043840 |
| 0.0001160  | -0.0003000 | 0.0000000 |      |   |              |              |
| 1309: 42   | 1 41       | 1 43      | 1 42 | 0 | 1314.2727600 | 1314.2730558 |
| -0.0002958 | -0.0003000 | 0.0000000 |      |   |              |              |
| 1310: 41   | 1 40       | 1 42      | 1 41 | 0 | 1314.5287900 | 1314.5288376 |
| -0.0000476 | -0.0003000 | 0.0000000 |      |   |              |              |
| 1311: 40   | 1 39       | 1 41      | 1 40 | 0 | 1314.7846200 | 1314.7844406 |
| 0.0001794  | -0.0003000 | 0.0000000 |      |   |              |              |
| 1312: 39   | 1 38       | 1 40      | 1 39 | 0 | 1315.0398700 | 1315.0399030 |
| -0.0000330 | -0.0003000 | 0.0000000 |      |   |              |              |
| 1313: 38   | 1 37       | 1 39      | 1 38 | 0 | 1315.2952500 | 1315.2952726 |
| -0.0000226 | -0.0003000 | 0.0000000 |      |   |              |              |
| 1314: 37   | 1 36       | 1 38      | 1 37 | 0 | 1315.5505400 | 1315.5506067 |
| -0.0000667 | -0.0003000 | 0.0000000 |      |   |              |              |
| 1315: 36   | 1 35       | 1 37      | 1 36 | 0 | 1315.8061000 | 1315.8059714 |
| 0.0001286  | -0.0003000 | 0.0000000 |      |   |              |              |
| 1316: 35   | 1 34       | 1 36      | 1 35 | 0 | 1316.0613800 | 1316.0614402 |
| -0.0000602 | -0.0003000 | 0.0000000 |      |   |              |              |
| 1317: 34   | 1 33       | 1 35      | 1 34 | 0 | 1316.3169600 | 1316.3170922 |
| -0.0001322 | -0.0003000 | 0.0000000 |      |   |              |              |
| 1318: 33   | 1 32       | 1 34      | 1 33 | 0 | 1316.5730700 | 1316.5730094 |
| 0.0000606  | -0.0003000 | 0.0000000 |      |   |              |              |
| 1319: 32   | 1 31       | 1 33      | 1 32 | 0 | 1316.8293900 | 1316.8292737 |
| 0.0001163  | -0.0003000 | 0.0000000 |      |   |              |              |
| 1320: 31   | 1 30       | 1 32      | 1 31 | 0 | 1317.0861400 | 1317.0859634 |
| 0.0001766  | -0.0003000 | 0.0000000 |      |   |              |              |
| 1321: 30   | 1 29       | 1 31      | 1 30 | 0 | 1317.3431000 | 1317.3431508 |
| -0.0000508 | -0.0003000 | 0.0000000 |      |   |              |              |
| 1322: 29   | 1 28       | 1 30      | 1 29 | 0 | 1317.6009800 | 1317.6008987 |
| 0.0000813  | -0.0003000 | 0.0000000 |      |   |              |              |
| 1323: 28   | 1 27       | 1 29      | 1 28 | 0 | 1317.8595600 | 1317.8592589 |
| 0.0003011  | -0.0003000 | 0.0000000 |      |   |              |              |
| 1324: 27   | 1 26       | 1 28      | 1 27 | 0 | 1318.1180300 | 1318.1182706 |
| -0.0002406 | -0.0003000 | 0.0000000 |      |   |              |              |
| 1325: 26   | 1 25       | 1 27      | 1 26 | 0 | 1318.3779400 | 1318.3779600 |
| -0.0000200 | -0.0003000 | 0.0000000 |      |   |              |              |
| 1326: 25   | 1 24       | 1 26      | 1 25 | 0 | 1318.6383700 | 1318.6383405 |
| 0.0000295  | -0.0003000 | 0.0000000 |      |   |              |              |
| 1327: 24   | 1 23       | 1 25      | 1 24 | 0 | 1318.8995900 | 1318.8994136 |
| 0.0001764  | -0.0003000 | 0.0000000 |      |   |              |              |
| 1328: 23   | 1 22       | 1 24      | 1 23 | 0 | 1319.1609600 | 1319.1611699 |
| -0.0002099 | -0.0003000 | 0.0000000 |      |   |              |              |
| 1329: 22   | 1 21       | 1 23      | 1 22 | 0 | 1319.4236100 | 1319.4235912 |
| 0.0000188  | -0.0003000 | 0.0000000 |      |   |              |              |
| 1330: 21   | 1 20       | 1 22      | 1 21 | 0 | 1319.6867200 | 1319.6866518 |

|            |                  |           |              |              |
|------------|------------------|-----------|--------------|--------------|
| 0.0000682  | -0.0003000       | 0.0000000 |              |              |
| 1331: 20   | 1 19 1 21 1 20 0 |           | 1319.9505300 | 1319.9503203 |
| 0.0002097  | -0.0003000       | 0.0000000 |              |              |
| 1332: 19   | 1 18 1 20 1 19 0 |           | 1320.2145300 | 1320.2145612 |
| -0.0000312 | -0.0003000       | 0.0000000 |              |              |
| 1333: 18   | 1 17 1 19 1 18 0 |           | 1320.4792300 | 1320.4793362 |
| -0.0001062 | -0.0003000       | 0.0000000 |              |              |
| 1334: 17   | 1 16 1 18 1 17 0 |           | 1320.7447500 | 1320.7446054 |
| 0.0001446  | -0.0003000       | 0.0000000 |              |              |
| 1335: 14   | 1 13 1 15 1 14 0 |           | 1321.5431200 | 1321.5429756 |
| 0.0001444  | -0.0003000       | 0.0000000 |              |              |
| 1336: 13   | 1 12 1 14 1 13 0 |           | 1321.8099600 | 1321.8098214 |
| 0.0001386  | -0.0003000       | 0.0000000 |              |              |
| 1337: 12   | 1 11 1 13 1 12 0 |           | 1322.0770200 | 1322.0769652 |
| 0.0000548  | -0.0003000       | 0.0000000 |              |              |
| 1338: 11   | 1 10 1 12 1 11 0 |           | 1322.3444100 | 1322.3443712 |
| 0.0000388  | -0.0003000       | 0.0000000 |              |              |
| 1339: 10   | 1 9 1 11 1 10 0  |           | 1322.6120000 | 1322.6120051 |
| -0.0000051 | -0.0003000       | 0.0000000 |              |              |
| 1340: 9    | 1 8 1 10 1 9 0   |           | 1322.8797900 | 1322.8798342 |
| -0.0000442 | -0.0003000       | 0.0000000 |              |              |
| 1341: 8    | 1 7 1 9 1 8 0    |           | 1323.1479400 | 1323.1478269 |
| 0.0001131  | -0.0003000       | 0.0000000 |              |              |
| 1342: 7    | 1 6 1 8 1 7 0    |           | 1323.4160200 | 1323.4159533 |
| 0.0000667  | -0.0003000       | 0.0000000 |              |              |
| 1343: 6    | 1 5 1 7 1 6 0    |           | 1323.6844100 | 1323.6841844 |
| 0.0002256  | -0.0003000       | 0.0000000 |              |              |
| 1344: 2    | 1 1 1 1 1 1 0 0  |           | 1326.0985500 | 1326.0985832 |
| -0.0000332 | -0.0003000       | 0.0000000 |              |              |
| 1345: 3    | 1 2 1 2 1 1 0    |           | 1326.3666000 | 1326.3664114 |
| 0.0001886  | -0.0003000       | 0.0000000 |              |              |
| 1346: 4    | 1 3 1 3 1 2 0    |           | 1326.6341500 | 1326.6340545 |
| 0.0000955  | -0.0003000       | 0.0000000 |              |              |
| 1347: 5    | 1 4 1 4 1 3 0    |           | 1326.9015300 | 1326.9014833 |
| 0.0000467  | -0.0003000       | 0.0000000 |              |              |
| 1348: 6    | 1 5 1 5 1 4 0    |           | 1327.1686900 | 1327.1686675 |
| 0.0000225  | -0.0003000       | 0.0000000 |              |              |
| 1349: 7    | 1 6 1 6 1 5 0    |           | 1327.4357600 | 1327.4355749 |
| 0.0001851  | -0.0003000       | 0.0000000 |              |              |
| 1350: 8    | 1 7 1 7 1 6 0    |           | 1327.7021900 | 1327.7021714 |
| 0.0000186  | -0.0003000       | 0.0000000 |              |              |
| 1351: 9    | 1 8 1 8 1 7 0    |           | 1327.9682800 | 1327.9684207 |
| -0.0001407 | -0.0003000       | 0.0000000 |              |              |
| 1352: 10   | 1 9 1 9 1 8 0    |           | 1328.2345200 | 1328.2342839 |
| 0.0002361  | -0.0003000       | 0.0000000 |              |              |
| 1353: 11   | 1 10 1 10 1 9 0  |           | 1328.4997700 | 1328.4997195 |
| 0.0000505  | -0.0003000       | 0.0000000 |              |              |
| 1354: 12   | 1 11 1 11 1 10 0 |           | 1328.7648000 | 1328.7646828 |
| 0.0001172  | -0.0003000       | 0.0000000 |              |              |
| 1355: 13   | 1 12 1 12 1 11 0 |           | 1329.0291500 | 1329.0291257 |
| 0.0000243  | -0.0003000       | 0.0000000 |              |              |
| 1356: 14   | 1 13 1 13 1 12 0 |           | 1329.2928600 | 1329.2929966 |
| -0.0001366 | -0.0003000       | 0.0000000 |              |              |
| 1357: 15   | 1 14 1 14 1 13 0 |           | 1329.5562500 | 1329.5562403 |
| 0.0000097  | -0.0003000       | 0.0000000 |              |              |
| 1358: 16   | 1 15 1 15 1 14 0 |           | 1329.8188200 | 1329.8187975 |
| 0.0000225  | -0.0003000       | 0.0000000 |              |              |
| 1359: 17   | 1 16 1 16 1 15 0 |           | 1330.0807100 | 1330.0806054 |
| 0.0001046  | -0.0003000       | 0.0000000 |              |              |
| 1360: 18   | 1 17 1 17 1 16 0 |           | 1330.3417300 | 1330.3415971 |
| 0.0001329  | -0.0003000       | 0.0000000 |              |              |
| 1361: 19   | 1 18 1 18 1 17 0 |           | 1330.6019200 | 1330.6017028 |
| 0.0002172  | -0.0003000       | 0.0000000 |              |              |
| 1362: 20   | 1 19 1 19 1 18 0 |           | 1330.8607900 | 1330.8608498 |
| -0.0000598 | -0.0003000       | 0.0000000 |              |              |

|            |            |           |    |   |    |   |    |   |              |              |
|------------|------------|-----------|----|---|----|---|----|---|--------------|--------------|
| 1363:      | 21         | 1         | 20 | 1 | 20 | 1 | 19 | 0 | 1331.1188300 | 1331.1189636 |
| -0.0001336 | -0.0003000 | 0.0000000 |    |   |    |   |    |   |              |              |
| 1364:      | 22         | 1         | 21 | 1 | 21 | 1 | 20 | 0 | 1331.3759000 | 1331.3759690 |
| -0.0000690 | -0.0003000 | 0.0000000 |    |   |    |   |    |   |              |              |
| 1365:      | 23         | 1         | 22 | 1 | 22 | 1 | 21 | 0 | 1331.6321300 | 1331.6317923 |
| 0.0003377  | -0.0003000 | 0.0000000 |    |   |    |   |    |   |              |              |
| 1366:      | 24         | 1         | 23 | 1 | 23 | 1 | 22 | 0 | 1331.8864900 | 1331.8863627 |
| 0.0001273  | -0.0003000 | 0.0000000 |    |   |    |   |    |   |              |              |
| 1367:      | 25         | 1         | 24 | 1 | 24 | 1 | 23 | 0 | 1332.1395400 | 1332.1396151 |
| -0.0000751 | -0.0003000 | 0.0000000 |    |   |    |   |    |   |              |              |
| 1368:      | 26         | 1         | 25 | 1 | 25 | 1 | 24 | 0 | 1332.3915400 | 1332.3914928 |
| 0.0000472  | -0.0003000 | 0.0000000 |    |   |    |   |    |   |              |              |
| 1369:      | 27         | 1         | 26 | 1 | 26 | 1 | 25 | 0 | 1332.6419900 | 1332.6419509 |
| 0.0000391  | -0.0003000 | 0.0000000 |    |   |    |   |    |   |              |              |
| 1370:      | 28         | 1         | 27 | 1 | 27 | 1 | 26 | 0 | 1332.8911300 | 1332.8909588 |
| 0.0001712  | -0.0003000 | 0.0000000 |    |   |    |   |    |   |              |              |
| 1371:      | 29         | 1         | 28 | 1 | 28 | 1 | 27 | 0 | 1333.1386000 | 1333.1385034 |
| 0.0000966  | -0.0003000 | 0.0000000 |    |   |    |   |    |   |              |              |
| 1372:      | 30         | 1         | 29 | 1 | 29 | 1 | 28 | 0 | 1333.3845700 | 1333.3845914 |
| -0.0000214 | -0.0003000 | 0.0000000 |    |   |    |   |    |   |              |              |
| 1373:      | 32         | 1         | 31 | 1 | 31 | 1 | 30 | 0 | 1333.8725900 | 1333.8725305 |
| 0.0000595  | -0.0003000 | 0.0000000 |    |   |    |   |    |   |              |              |
| 1374:      | 33         | 1         | 32 | 1 | 32 | 1 | 31 | 0 | 1334.1146900 | 1334.1145014 |
| 0.0001886  | -0.0003000 | 0.0000000 |    |   |    |   |    |   |              |              |
| 1375:      | 34         | 1         | 33 | 1 | 33 | 1 | 32 | 0 | 1334.3551100 | 1334.3552520 |
| -0.0001420 | -0.0003000 | 0.0000000 |    |   |    |   |    |   |              |              |
| 1376:      | 35         | 1         | 34 | 1 | 34 | 1 | 33 | 0 | 1334.5949700 | 1334.5948862 |
| 0.0000838  | -0.0003000 | 0.0000000 |    |   |    |   |    |   |              |              |
| 1377:      | 36         | 1         | 35 | 1 | 35 | 1 | 34 | 0 | 1334.8333600 | 1334.8335182 |
| -0.0001582 | -0.0003000 | 0.0000000 |    |   |    |   |    |   |              |              |
| 1378:      | 37         | 1         | 36 | 1 | 36 | 1 | 35 | 0 | 1335.0712500 | 1335.0712685 |
| -0.0000185 | -0.0003000 | 0.0000000 |    |   |    |   |    |   |              |              |
| 1379:      | 38         | 1         | 37 | 1 | 37 | 1 | 36 | 0 | 1335.3082300 | 1335.3082579 |
| -0.0000279 | -0.0003000 | 0.0000000 |    |   |    |   |    |   |              |              |
| 1380:      | 40         | 1         | 39 | 1 | 39 | 1 | 38 | 0 | 1335.7806100 | 1335.7804143 |
| 0.0001957  | -0.0003000 | 0.0000000 |    |   |    |   |    |   |              |              |
| 1381:      | 41         | 1         | 40 | 1 | 40 | 1 | 39 | 0 | 1336.0158700 | 1336.0157887 |
| 0.0000813  | -0.0003000 | 0.0000000 |    |   |    |   |    |   |              |              |
| 1382:      | 42         | 1         | 41 | 1 | 41 | 1 | 40 | 0 | 1336.2507900 | 1336.2508121 |
| -0.0000221 | -0.0003000 | 0.0000000 |    |   |    |   |    |   |              |              |
| 1383:      | 43         | 1         | 42 | 1 | 42 | 1 | 41 | 0 | 1336.4856900 | 1336.4855562 |
| 0.0001338  | -0.0003000 | 0.0000000 |    |   |    |   |    |   |              |              |
| 1384:      | 44         | 1         | 43 | 1 | 43 | 1 | 42 | 0 | 1336.7201500 | 1336.7200789 |
| 0.0000711  | -0.0003000 | 0.0000000 |    |   |    |   |    |   |              |              |
| 1385:      | 45         | 1         | 44 | 1 | 44 | 1 | 43 | 0 | 1336.9546000 | 1336.9544248 |
| 0.0001752  | -0.0003000 | 0.0000000 |    |   |    |   |    |   |              |              |
| 1386:      | 46         | 1         | 45 | 1 | 45 | 1 | 44 | 0 | 1337.1887400 | 1337.1886268 |
| 0.0001132  | -0.0003000 | 0.0000000 |    |   |    |   |    |   |              |              |
| 1387:      | 47         | 1         | 46 | 1 | 46 | 1 | 45 | 0 | 1337.4227100 | 1337.4227069 |
| 0.0000031  | -0.0003000 | 0.0000000 |    |   |    |   |    |   |              |              |
| 1388:      | 49         | 1         | 48 | 1 | 48 | 1 | 47 | 0 | 1337.8905500 | 1337.8905471 |
| 0.0000029  | -0.0003000 | 0.0000000 |    |   |    |   |    |   |              |              |
| 1389:      | 50         | 1         | 49 | 1 | 49 | 1 | 48 | 0 | 1338.1244300 | 1338.1243130 |
| 0.0001170  | -0.0003000 | 0.0000000 |    |   |    |   |    |   |              |              |
| 1390:      | 51         | 1         | 50 | 1 | 50 | 1 | 49 | 0 | 1338.3579100 | 1338.3579716 |
| -0.0000616 | -0.0003000 | 0.0000000 |    |   |    |   |    |   |              |              |
| 1391:      | 52         | 1         | 51 | 1 | 51 | 1 | 50 | 0 | 1338.5914700 | 1338.5915149 |
| -0.0000449 | -0.0003000 | 0.0000000 |    |   |    |   |    |   |              |              |
| 1392:      | 53         | 1         | 52 | 1 | 52 | 1 | 51 | 0 | 1338.8250600 | 1338.8249327 |
| 0.0001273  | -0.0003000 | 0.0000000 |    |   |    |   |    |   |              |              |
| 1393:      | 54         | 1         | 53 | 1 | 53 | 1 | 52 | 0 | 1339.0582600 | 1339.0582130 |
| 0.0000470  | -0.0003000 | 0.0000000 |    |   |    |   |    |   |              |              |
| 1394:      | 55         | 1         | 54 | 1 | 54 | 1 | 53 | 0 | 1339.2914500 | 1339.2913433 |
| 0.0001067  | -0.0003000 | 0.0000000 |    |   |    |   |    |   |              |              |
| 1395:      | 56         | 1         | 55 | 1 | 55 | 1 | 54 | 0 | 1339.5243200 | 1339.5243102 |

|            |            |           |              |              |
|------------|------------|-----------|--------------|--------------|
| 0.0000098  | -0.0003000 | 0.0000000 |              |              |
| 1396: 57   | 1 56       | 1 56      | 1 55         | 0            |
| 0.0000394  | -0.0003000 | 0.0000000 | 1339.7571400 | 1339.7571006 |
| 1397: 58   | 1 57       | 1 57      | 1 56         | 0            |
| -0.0001716 | -0.0003000 | 0.0000000 | 1339.9895300 | 1339.9897016 |
| 1398: 59   | 1 58       | 1 58      | 1 57         | 0            |
| -0.0000108 | -0.0003000 | 0.0000000 | 1340.2220900 | 1340.2221008 |
| 1399: 60   | 1 59       | 1 59      | 1 58         | 0            |
| 0.0002238  | -0.0003000 | 0.0000000 | 1340.4545100 | 1340.4542862 |
| 1400: 61   | 1 60       | 1 60      | 1 59         | 0            |
| 0.0002434  | -0.0003000 | 0.0000000 | 1340.6864900 | 1340.6862466 |
| 1401: 62   | 1 61       | 1 61      | 1 60         | 0            |
| -0.0001916 | -0.0003000 | 0.0000000 | 1340.9177800 | 1340.9179716 |
| 1402: 64   | 1 63       | 1 63      | 1 62         | 0            |
| 0.0001534  | -0.0003000 | 0.0000000 | 1341.3808300 | 1341.3806766 |
| 1403: 65   | 1 64       | 1 64      | 1 63         | 0            |
| 0.0000208  | -0.0003000 | 0.0000000 | 1341.6116600 | 1341.6116392 |
| 1404: 66   | 1 65       | 1 65      | 1 64         | 0            |
| 0.0002988  | -0.0003000 | 0.0000000 | 1341.8426300 | 1341.8423312 |
| 1405: 67   | 1 66       | 1 66      | 1 65         | 0            |
| -0.0000057 | -0.0003000 | 0.0000000 | 1342.0727400 | 1342.0727457 |
| 1406: 73   | 1 72       | 1 72      | 1 71         | 0            |
| -0.0007391 | -0.0003000 | 0.0000000 | 1343.4483300 | 1343.4490691 |
| 1407: 74   | 1 73       | 1 73      | 1 72         | 0            |
| -0.0006828 | -0.0003000 | 0.0000000 | 1343.6767000 | 1343.6773828 |
| 1408: 75   | 1 74       | 1 74      | 1 73         | 0            |
| -0.0005786 | -0.0003000 | 0.0000000 | 1343.9048000 | 1343.9053786 |
| 1409: 76   | 1 75       | 1 75      | 1 74         | 0            |
| -0.0004831 | -0.0003000 | 0.0000000 | 1344.1325700 | 1344.1330531 |
| 1410: 77   | 1 76       | 1 76      | 1 75         | 0            |
| -0.0004328 | -0.0003000 | 0.0000000 | 1344.3599700 | 1344.3604028 |
| 1411: 78   | 1 77       | 1 77      | 1 76         | 0            |
| -0.0007049 | -0.0003000 | 0.0000000 | 1344.5867200 | 1344.5874249 |
| 1412: 79   | 1 78       | 1 78      | 1 77         | 0            |
| -0.0003262 | -0.0003000 | 0.0000000 | 1344.8137900 | 1344.8141162 |
| 1413: 80   | 1 79       | 1 79      | 1 78         | 0            |
| -0.0003041 | -0.0003000 | 0.0000000 | 1345.0401700 | 1345.0404741 |
| 1414: 81   | 1 80       | 1 80      | 1 79         | 0            |
| -0.0001059 | -0.0003000 | 0.0000000 | 1345.2663900 | 1345.2664959 |
| 1415: 82   | 1 81       | 1 81      | 1 80         | 0            |
| -0.0001991 | -0.0003000 | 0.0000000 | 1345.4919800 | 1345.4921791 |
| 1416: 83   | 1 82       | 1 82      | 1 81         | 0            |
| -0.0001014 | -0.0003000 | 0.0000000 | 1345.7174200 | 1345.7175214 |
| 1417: 84   | 1 83       | 1 83      | 1 82         | 0            |
| -0.0001103 | -0.0003000 | 0.0000000 | 1345.9424100 | 1345.9425203 |
| 1418: 85   | 1 84       | 1 84      | 1 83         | 0            |
| 0.0000362  | -0.0003000 | 0.0000000 | 1346.1672100 | 1346.1671738 |
| 1419: 86   | 1 85       | 1 85      | 1 84         | 0            |
| 0.0001704  | -0.0003000 | 0.0000000 | 1346.3916500 | 1346.3914796 |
| 1420: 87   | 1 86       | 1 86      | 1 85         | 0            |
| -0.0000156 | -0.0003000 | 0.0000000 | 1346.6154200 | 1346.6154356 |
| 1421: 88   | 1 87       | 1 87      | 1 86         | 0            |
| 0.0003101  | -0.0003000 | 0.0000000 | 1346.8393500 | 1346.8390399 |
| 1422: 89   | 1 88       | 1 88      | 1 87         | 0            |
| 0.0001096  | -0.0003000 | 0.0000000 | 1347.0624000 | 1347.0622904 |
| 1423: 90   | 1 89       | 1 89      | 1 88         | 0            |
| 0.0001147  | -0.0003000 | 0.0000000 | 1347.2853000 | 1347.2851853 |
| 1424: 91   | 1 90       | 1 90      | 1 89         | 0            |
| -0.0002726 | -0.0003000 | 0.0000000 | 1347.5074500 | 1347.5077226 |
| 1425: 92   | 1 91       | 1 91      | 1 90         | 0            |
| -0.0001304 | -0.0003000 | 0.0000000 | 1347.7297700 | 1347.7299004 |
| 1426: 93   | 1 92       | 1 92      | 1 91         | 0            |
| -0.0002369 | -0.0003000 | 0.0000000 | 1347.9514800 | 1347.9517169 |
| 1427: 94   | 1 93       | 1 93      | 1 92         | 0            |
| -0.0001803 | -0.0003000 | 0.0000000 | 1348.1729900 | 1348.1731703 |

|            |            |           |      |   |              |              |
|------------|------------|-----------|------|---|--------------|--------------|
| 1428: 95   | 1 94       | 1 94      | 1 93 | 0 | 1348.3935800 | 1348.3942589 |
| -0.0006789 | -0.0003000 | 0.0000000 |      |   |              |              |
| 1429: 96   | 1 95       | 1 95      | 1 94 | 0 | 1348.6143500 | 1348.6149808 |
| -0.0006308 | -0.0003000 | 0.0000000 |      |   |              |              |
| 1430: 97   | 1 96       | 1 96      | 1 95 | 0 | 1348.8349100 | 1348.8353343 |
| -0.0004243 | -0.0003000 | 0.0000000 |      |   |              |              |
| 1431: 90   | 1 90       | 1 91      | 1 91 | 0 | 1302.0415900 | 1302.0411267 |
| 0.0004633  | -0.0003000 | 0.0000000 |      |   |              |              |
| 1432: 88   | 1 88       | 1 89      | 1 89 | 0 | 1302.5670600 | 1302.5669880 |
| 0.0000720  | -0.0003000 | 0.0000000 |      |   |              |              |
| 1433: 87   | 1 87       | 1 88      | 1 88 | 0 | 1302.8298700 | 1302.8297887 |
| 0.0000813  | -0.0003000 | 0.0000000 |      |   |              |              |
| 1434: 86   | 1 86       | 1 87      | 1 87 | 0 | 1303.0924600 | 1303.0925009 |
| -0.0000409 | -0.0003000 | 0.0000000 |      |   |              |              |
| 1435: 85   | 1 85       | 1 86      | 1 86 | 0 | 1303.3555500 | 1303.3551233 |
| 0.0004267  | -0.0003000 | 0.0000000 |      |   |              |              |
| 1436: 84   | 1 84       | 1 85      | 1 85 | 0 | 1303.6180400 | 1303.6176546 |
| 0.0003854  | -0.0003000 | 0.0000000 |      |   |              |              |
| 1437: 83   | 1 83       | 1 84      | 1 84 | 0 | 1303.8803900 | 1303.8800932 |
| 0.0002968  | -0.0003000 | 0.0000000 |      |   |              |              |
| 1438: 82   | 1 82       | 1 83      | 1 83 | 0 | 1304.1424900 | 1304.1424379 |
| 0.0000521  | -0.0003000 | 0.0000000 |      |   |              |              |
| 1439: 81   | 1 81       | 1 82      | 1 82 | 0 | 1304.4046200 | 1304.4046874 |
| -0.0000674 | -0.0003000 | 0.0000000 |      |   |              |              |
| 1440: 80   | 1 80       | 1 81      | 1 81 | 0 | 1304.6668000 | 1304.6668401 |
| -0.0000401 | -0.0003000 | 0.0000000 |      |   |              |              |
| 1441: 79   | 1 79       | 1 80      | 1 80 | 0 | 1304.9290500 | 1304.9288949 |
| 0.0001551  | -0.0003000 | 0.0000000 |      |   |              |              |
| 1442: 78   | 1 78       | 1 79      | 1 79 | 0 | 1305.1905900 | 1305.1908501 |
| -0.0002601 | -0.0003000 | 0.0000000 |      |   |              |              |
| 1443: 77   | 1 77       | 1 78      | 1 78 | 0 | 1305.4522800 | 1305.4527046 |
| -0.0004246 | -0.0003000 | 0.0000000 |      |   |              |              |
| 1444: 76   | 1 76       | 1 77      | 1 77 | 0 | 1305.7147900 | 1305.7144569 |
| 0.0003331  | -0.0003000 | 0.0000000 |      |   |              |              |
| 1445: 75   | 1 75       | 1 76      | 1 76 | 0 | 1305.9763300 | 1305.9761056 |
| 0.0002244  | -0.0003000 | 0.0000000 |      |   |              |              |
| 1446: 74   | 1 74       | 1 75      | 1 75 | 0 | 1306.2377900 | 1306.2376494 |
| 0.0001406  | -0.0003000 | 0.0000000 |      |   |              |              |
| 1447: 73   | 1 73       | 1 74      | 1 74 | 0 | 1306.4990500 | 1306.4990869 |
| -0.0000369 | -0.0003000 | 0.0000000 |      |   |              |              |
| 1448: 72   | 1 72       | 1 73      | 1 73 | 0 | 1306.7604800 | 1306.7604166 |
| 0.0000634  | -0.0003000 | 0.0000000 |      |   |              |              |
| 1449: 71   | 1 71       | 1 72      | 1 72 | 0 | 1307.0214500 | 1307.0216372 |
| -0.0001872 | -0.0003000 | 0.0000000 |      |   |              |              |
| 1450: 70   | 1 70       | 1 71      | 1 71 | 0 | 1307.2826100 | 1307.2827473 |
| -0.0001373 | -0.0003000 | 0.0000000 |      |   |              |              |
| 1451: 69   | 1 69       | 1 70      | 1 70 | 0 | 1307.5436300 | 1307.5437456 |
| -0.0001156 | -0.0003000 | 0.0000000 |      |   |              |              |
| 1452: 68   | 1 68       | 1 69      | 1 69 | 0 | 1307.8044800 | 1307.8046306 |
| -0.0001506 | -0.0003000 | 0.0000000 |      |   |              |              |
| 1453: 67   | 1 67       | 1 68      | 1 68 | 0 | 1308.0654100 | 1308.0654010 |
| 0.0000090  | -0.0003000 | 0.0000000 |      |   |              |              |
| 1454: 66   | 1 66       | 1 67      | 1 67 | 0 | 1308.3261400 | 1308.3260554 |
| 0.0000846  | -0.0003000 | 0.0000000 |      |   |              |              |
| 1455: 65   | 1 65       | 1 66      | 1 66 | 0 | 1308.5867900 | 1308.5865925 |
| 0.0001975  | -0.0003000 | 0.0000000 |      |   |              |              |
| 1456: 64   | 1 64       | 1 65      | 1 65 | 0 | 1308.8470100 | 1308.8470108 |
| -0.0000008 | -0.0003000 | 0.0000000 |      |   |              |              |
| 1457: 63   | 1 63       | 1 64      | 1 64 | 0 | 1309.1072300 | 1309.1073091 |
| -0.0000791 | -0.0003000 | 0.0000000 |      |   |              |              |
| 1458: 62   | 1 62       | 1 63      | 1 63 | 0 | 1309.3675500 | 1309.3674861 |
| 0.0000639  | -0.0003000 | 0.0000000 |      |   |              |              |
| 1459: 61   | 1 61       | 1 62      | 1 62 | 0 | 1309.6275800 | 1309.6275404 |
| 0.0000396  | -0.0003000 | 0.0000000 |      |   |              |              |
| 1460: 60   | 1 60       | 1 61      | 1 61 | 0 | 1309.8872700 | 1309.8874707 |

|            |            |           |      |                             |
|------------|------------|-----------|------|-----------------------------|
| -0.0002007 | -0.0003000 | 0.0000000 |      |                             |
| 1461: 59   | 1 59       | 1 60      | 1 60 | 0 1310.1472200 1310.1472757 |
| -0.0000557 | -0.0003000 | 0.0000000 |      |                             |
| 1462: 58   | 1 58       | 1 59      | 1 59 | 0 1310.4068300 1310.4069543 |
| -0.0001243 | -0.0003000 | 0.0000000 |      |                             |
| 1463: 57   | 1 57       | 1 58      | 1 58 | 0 1310.6661100 1310.6665053 |
| -0.0003953 | -0.0003000 | 0.0000000 |      |                             |
| 1464: 56   | 1 56       | 1 57      | 1 57 | 0 1310.9259200 1310.9259274 |
| -0.0000074 | -0.0003000 | 0.0000000 |      |                             |
| 1465: 55   | 1 55       | 1 56      | 1 56 | 0 1311.1851500 1311.1852195 |
| -0.0000695 | -0.0003000 | 0.0000000 |      |                             |
| 1466: 54   | 1 54       | 1 55      | 1 55 | 0 1311.4444700 1311.4443807 |
| 0.0000893  | -0.0003000 | 0.0000000 |      |                             |
| 1467: 53   | 1 53       | 1 54      | 1 54 | 0 1311.7029900 1311.7034098 |
| -0.0004198 | -0.0003000 | 0.0000000 |      |                             |
| 1468: 52   | 1 52       | 1 53      | 1 53 | 0 1311.9617400 1311.9623061 |
| -0.0005661 | -0.0003000 | 0.0000000 |      |                             |
| 1469: 51   | 1 51       | 1 52      | 1 52 | 0 1312.2206100 1312.2210688 |
| -0.0004588 | -0.0003000 | 0.0000000 |      |                             |
| 1470: 50   | 1 50       | 1 51      | 1 51 | 0 1312.4794300 1312.4796970 |
| -0.0002670 | -0.0003000 | 0.0000000 |      |                             |
| 1471: 49   | 1 49       | 1 50      | 1 50 | 0 1312.7377100 1312.7381903 |
| -0.0004803 | -0.0003000 | 0.0000000 |      |                             |
| 1472: 48   | 1 48       | 1 49      | 1 49 | 0 1312.9960800 1312.9965482 |
| -0.0004682 | -0.0003000 | 0.0000000 |      |                             |
| 1473: 47   | 1 47       | 1 48      | 1 48 | 0 1313.2542200 1313.2547704 |
| -0.0005504 | -0.0003000 | 0.0000000 |      |                             |
| 1474: 46   | 1 46       | 1 47      | 1 47 | 0 1313.5120100 1313.5128570 |
| -0.0008470 | -0.0003000 | 0.0000000 |      |                             |
| 1475: 45   | 1 45       | 1 46      | 1 46 | 0 1313.7702600 1313.7708080 |
| -0.0005480 | -0.0003000 | 0.0000000 |      |                             |
| 1476: 44   | 1 44       | 1 45      | 1 45 | 0 1314.0278400 1314.0286238 |
| -0.0007838 | -0.0003000 | 0.0000000 |      |                             |
| 1477: 43   | 1 43       | 1 44      | 1 44 | 0 1314.2855000 1314.2863052 |
| -0.0008052 | -0.0003000 | 0.0000000 |      |                             |
| 1478: 38   | 1 38       | 1 39      | 1 39 | 0 1315.5728600 1315.5727435 |
| 0.0001165  | -0.0003000 | 0.0000000 |      |                             |
| 1479: 37   | 1 37       | 1 38      | 1 38 | 0 1315.8295700 1315.8296528 |
| -0.0000828 | -0.0003000 | 0.0000000 |      |                             |
| 1480: 36   | 1 36       | 1 37      | 1 37 | 0 1316.0864100 1316.0864435 |
| -0.0000335 | -0.0003000 | 0.0000000 |      |                             |
| 1481: 35   | 1 35       | 1 36      | 1 36 | 0 1316.3429800 1316.3431198 |
| -0.0001398 | -0.0003000 | 0.0000000 |      |                             |
| 1482: 34   | 1 34       | 1 35      | 1 35 | 0 1316.5993700 1316.5996866 |
| -0.0003166 | -0.0003000 | 0.0000000 |      |                             |
| 1483: 33   | 1 33       | 1 34      | 1 34 | 0 1316.8559700 1316.8561495 |
| -0.0001795 | -0.0003000 | 0.0000000 |      |                             |
| 1484: 32   | 1 32       | 1 33      | 1 33 | 0 1317.1124100 1317.1125147 |
| -0.0001047 | -0.0003000 | 0.0000000 |      |                             |
| 1485: 31   | 1 31       | 1 32      | 1 32 | 0 1317.3688100 1317.3687891 |
| 0.0000209  | -0.0003000 | 0.0000000 |      |                             |
| 1486: 30   | 1 30       | 1 31      | 1 31 | 0 1317.6250100 1317.6249802 |
| 0.0000298  | -0.0003000 | 0.0000000 |      |                             |
| 1487: 29   | 1 29       | 1 30      | 1 30 | 0 1317.8811400 1317.8810962 |
| 0.0000438  | -0.0003000 | 0.0000000 |      |                             |
| 1488: 28   | 1 28       | 1 29      | 1 29 | 0 1318.1370300 1318.1371457 |
| -0.0001157 | -0.0003000 | 0.0000000 |      |                             |
| 1489: 27   | 1 27       | 1 28      | 1 28 | 0 1318.3933100 1318.3931381 |
| 0.0001719  | -0.0003000 | 0.0000000 |      |                             |
| 1490: 26   | 1 26       | 1 27      | 1 27 | 0 1318.6491500 1318.6490830 |
| 0.0000670  | -0.0003000 | 0.0000000 |      |                             |
| 1491: 25   | 1 25       | 1 26      | 1 26 | 0 1318.9049800 1318.9049906 |
| -0.0000106 | -0.0003000 | 0.0000000 |      |                             |
| 1492: 24   | 1 24       | 1 25      | 1 25 | 0 1319.1605600 1319.1608709 |
| -0.0003109 | -0.0003000 | 0.0000000 |      |                             |

|            |            |           |      |   |              |              |
|------------|------------|-----------|------|---|--------------|--------------|
| 1493: 23   | 1 23       | 1 24      | 1 24 | 0 | 1319.4167800 | 1319.4167343 |
| 0.0000457  | -0.0003000 | 0.0000000 |      |   |              |              |
| 1494: 22   | 1 22       | 1 23      | 1 23 | 0 | 1319.6729900 | 1319.6725910 |
| 0.0003990  | -0.0003000 | 0.0000000 |      |   |              |              |
| 1495: 21   | 1 21       | 1 22      | 1 22 | 0 | 1319.9283400 | 1319.9284508 |
| -0.0001108 | -0.0003000 | 0.0000000 |      |   |              |              |
| 1496: 20   | 1 20       | 1 21      | 1 21 | 0 | 1320.1844700 | 1320.1843231 |
| 0.0001469  | -0.0003000 | 0.0000000 |      |   |              |              |
| 1497: 19   | 1 19       | 1 20      | 1 20 | 0 | 1320.4402900 | 1320.4402166 |
| 0.0000734  | -0.0003000 | 0.0000000 |      |   |              |              |
| 1498: 18   | 1 18       | 1 19      | 1 19 | 0 | 1320.6961700 | 1320.6961389 |
| 0.0000311  | -0.0003000 | 0.0000000 |      |   |              |              |
| 1499: 17   | 1 17       | 1 18      | 1 18 | 0 | 1320.9518900 | 1320.9520967 |
| -0.0002067 | -0.0003000 | 0.0000000 |      |   |              |              |
| 1500: 16   | 1 16       | 1 17      | 1 17 | 0 | 1321.2080300 | 1321.2080952 |
| -0.0000652 | -0.0003000 | 0.0000000 |      |   |              |              |
| 1501: 15   | 1 15       | 1 16      | 1 16 | 0 | 1321.4641000 | 1321.4641382 |
| -0.0000382 | -0.0003000 | 0.0000000 |      |   |              |              |
| 1502: 14   | 1 14       | 1 15      | 1 15 | 0 | 1321.7201200 | 1321.7202277 |
| -0.0001077 | -0.0003000 | 0.0000000 |      |   |              |              |
| 1503: 13   | 1 13       | 1 14      | 1 14 | 0 | 1321.9762500 | 1321.9763639 |
| -0.0001139 | -0.0003000 | 0.0000000 |      |   |              |              |
| 1504: 12   | 1 12       | 1 13      | 1 13 | 0 | 1322.2325600 | 1322.2325451 |
| 0.0000149  | -0.0003000 | 0.0000000 |      |   |              |              |
| 1505: 11   | 1 11       | 1 12      | 1 12 | 0 | 1322.4886100 | 1322.4887675 |
| -0.0001575 | -0.0003000 | 0.0000000 |      |   |              |              |
| 1506: 10   | 1 10       | 1 11      | 1 11 | 0 | 1322.7450100 | 1322.7450252 |
| -0.0000152 | -0.0003000 | 0.0000000 |      |   |              |              |
| 1507: 9    | 1 9        | 1 10      | 1 10 | 0 | 1323.0013500 | 1323.0013101 |
| 0.0000399  | -0.0003000 | 0.0000000 |      |   |              |              |
| 1508: 8    | 1 8        | 1 9       | 1 9  | 0 | 1323.2577200 | 1323.2576123 |
| 0.0001077  | -0.0003000 | 0.0000000 |      |   |              |              |
| 1509: 7    | 1 7        | 1 8       | 1 8  | 0 | 1323.5139600 | 1323.5139193 |
| 0.0000407  | -0.0003000 | 0.0000000 |      |   |              |              |
| 1510: 6    | 1 6        | 1 7       | 1 7  | 0 | 1323.7705200 | 1323.7702172 |
| 0.0003028  | -0.0003000 | 0.0000000 |      |   |              |              |
| 1511: 4    | 1 4        | 1 5       | 1 5  | 0 | 1324.2824800 | 1324.2827187 |
| -0.0002387 | -0.0003000 | 0.0000000 |      |   |              |              |
| 1512: 3    | 1 3        | 1 4       | 1 4  | 0 | 1324.5388100 | 1324.5388850 |
| -0.0000750 | -0.0003000 | 0.0000000 |      |   |              |              |
| 1513: 2    | 1 2        | 1 3       | 1 3  | 0 | 1324.7948500 | 1324.7949674 |
| -0.0001174 | -0.0003000 | 0.0000000 |      |   |              |              |
| 1514: 2    | 1 2        | 1 1       | 1 1  | 0 | 1326.0732800 | 1326.0733019 |
| -0.0000219 | -0.0003000 | 0.0000000 |      |   |              |              |
| 1515: 3    | 1 3        | 1 2       | 1 2  | 0 | 1326.3285200 | 1326.3283787 |
| 0.0001413  | -0.0003000 | 0.0000000 |      |   |              |              |
| 1516: 4    | 1 4        | 1 3       | 1 3  | 0 | 1326.5830800 | 1326.5831987 |
| -0.0001187 | -0.0003000 | 0.0000000 |      |   |              |              |
| 1517: 5    | 1 5        | 1 4       | 1 4  | 0 | 1326.8379200 | 1326.8377363 |
| 0.0001837  | -0.0003000 | 0.0000000 |      |   |              |              |
| 1518: 6    | 1 6        | 1 5       | 1 5  | 0 | 1327.0919900 | 1327.0919662 |
| 0.0000238  | -0.0003000 | 0.0000000 |      |   |              |              |
| 1519: 7    | 1 7        | 1 6       | 1 6  | 0 | 1327.3461000 | 1327.3458641 |
| 0.0002359  | -0.0003000 | 0.0000000 |      |   |              |              |
| 1520: 8    | 1 8        | 1 7       | 1 7  | 0 | 1327.5995600 | 1327.5994063 |
| 0.0001537  | -0.0003000 | 0.0000000 |      |   |              |              |
| 1521: 9    | 1 9        | 1 8       | 1 8  | 0 | 1327.8526500 | 1327.8525705 |
| 0.0000795  | -0.0003000 | 0.0000000 |      |   |              |              |
| 1522: 10   | 1 10       | 1 9       | 1 9  | 0 | 1328.1052800 | 1328.1053359 |
| -0.0000559 | -0.0003000 | 0.0000000 |      |   |              |              |
| 1523: 11   | 1 11       | 1 10      | 1 10 | 0 | 1328.3576000 | 1328.3576830 |
| -0.0000830 | -0.0003000 | 0.0000000 |      |   |              |              |
| 1524: 12   | 1 12       | 1 11      | 1 11 | 0 | 1328.6095700 | 1328.6095945 |
| -0.0000245 | -0.0003000 | 0.0000000 |      |   |              |              |
| 1525: 13   | 1 13       | 1 12      | 1 12 | 0 | 1328.8612500 | 1328.8610548 |

|            |            |           |              |              |
|------------|------------|-----------|--------------|--------------|
| 0.0001952  | -0.0003000 | 0.0000000 |              |              |
| 1526: 14   | 1 14       | 1 13      | 1 13         | 0            |
| 0.0001694  | -0.0003000 | 0.0000000 | 1329.1122200 | 1329.1120506 |
| 1527: 15   | 1 15       | 1 14      | 1 14         | 0            |
| 0.0001594  | -0.0003000 | 0.0000000 | 1329.3627300 | 1329.3625706 |
| 1528: 16   | 1 16       | 1 15      | 1 15         | 0            |
| 0.0000441  | -0.0003000 | 0.0000000 | 1329.6126500 | 1329.6126059 |
| 1529: 17   | 1 17       | 1 16      | 1 16         | 0            |
| -0.0000700 | -0.0003000 | 0.0000000 | 1329.8620800 | 1329.8621500 |
| 1530: 18   | 1 18       | 1 17      | 1 17         | 0            |
| -0.0002185 | -0.0003000 | 0.0000000 | 1330.1109800 | 1330.1111985 |
| 1531: 19   | 1 19       | 1 18      | 1 18         | 0            |
| 0.0001908  | -0.0003000 | 0.0000000 | 1330.3599400 | 1330.3597492 |
| 1532: 20   | 1 20       | 1 19      | 1 19         | 0            |
| 0.0000476  | -0.0003000 | 0.0000000 | 1330.6078500 | 1330.6078024 |
| 1533: 21   | 1 21       | 1 20      | 1 20         | 0            |
| 0.0001102  | -0.0003000 | 0.0000000 | 1330.8554700 | 1330.8553598 |
| 1534: 22   | 1 22       | 1 21      | 1 21         | 0            |
| 0.0000646  | -0.0003000 | 0.0000000 | 1331.1024900 | 1331.1024254 |
| 1535: 23   | 1 23       | 1 22      | 1 22         | 0            |
| 0.0000353  | -0.0003000 | 0.0000000 | 1331.3490400 | 1331.3490047 |
| 1536: 24   | 1 24       | 1 23      | 1 23         | 0            |
| 0.0001356  | -0.0003000 | 0.0000000 | 1331.5952400 | 1331.5951044 |
| 1537: 25   | 1 25       | 1 24      | 1 24         | 0            |
| -0.0003327 | -0.0003000 | 0.0000000 | 1331.8404000 | 1331.8407327 |
| 1538: 26   | 1 26       | 1 25      | 1 25         | 0            |
| 0.0000914  | -0.0003000 | 0.0000000 | 1332.0859900 | 1332.0858986 |
| 1539: 27   | 1 27       | 1 26      | 1 26         | 0            |
| -0.0000717 | -0.0003000 | 0.0000000 | 1332.3305400 | 1332.3306117 |
| 1540: 28   | 1 28       | 1 27      | 1 27         | 0            |
| -0.0004125 | -0.0003000 | 0.0000000 | 1332.5744700 | 1332.5748825 |
| 1541: 29   | 1 29       | 1 28      | 1 28         | 0            |
| 0.0001686  | -0.0003000 | 0.0000000 | 1332.8188900 | 1332.8187214 |
| 1542: 30   | 1 30       | 1 29      | 1 29         | 0            |
| -0.0000490 | -0.0003000 | 0.0000000 | 1333.0620900 | 1333.0621390 |
| 1543: 31   | 1 31       | 1 30      | 1 30         | 0            |
| 0.0001840  | -0.0003000 | 0.0000000 | 1333.3053300 | 1333.3051460 |
| 1544: 32   | 1 32       | 1 31      | 1 31         | 0            |
| 0.0000674  | -0.0003000 | 0.0000000 | 1333.5478200 | 1333.5477526 |
| 1545: 33   | 1 33       | 1 32      | 1 32         | 0            |
| 0.0002111  | -0.0003000 | 0.0000000 | 1333.7901800 | 1333.7899689 |
| 1546: 34   | 1 34       | 1 33      | 1 33         | 0            |
| -0.0000243 | -0.0003000 | 0.0000000 | 1334.0317800 | 1334.0318043 |
| 1547: 35   | 1 35       | 1 34      | 1 34         | 0            |
| -0.0001079 | -0.0003000 | 0.0000000 | 1334.2731600 | 1334.2732679 |
| 1548: 36   | 1 36       | 1 35      | 1 35         | 0            |
| 0.0000519  | -0.0003000 | 0.0000000 | 1334.5144200 | 1334.5143681 |
| 1549: 37   | 1 37       | 1 36      | 1 36         | 0            |
| -0.0000226 | -0.0003000 | 0.0000000 | 1334.7550900 | 1334.7551126 |
| 1550: 38   | 1 38       | 1 37      | 1 37         | 0            |
| 0.0001015  | -0.0003000 | 0.0000000 | 1334.9956100 | 1334.9955085 |
| 1551: 39   | 1 39       | 1 38      | 1 38         | 0            |
| -0.0001322 | -0.0003000 | 0.0000000 | 1335.2354300 | 1335.2355622 |
| 1552: 40   | 1 40       | 1 39      | 1 39         | 0            |
| 0.0000105  | -0.0003000 | 0.0000000 | 1335.4752900 | 1335.4752795 |
| 1553: 41   | 1 41       | 1 40      | 1 40         | 0            |
| 0.0000345  | -0.0003000 | 0.0000000 | 1335.7147000 | 1335.7146655 |
| 1554: 42   | 1 42       | 1 41      | 1 41         | 0            |
| 0.0000953  | -0.0003000 | 0.0000000 | 1335.9538200 | 1335.9537247 |
| 1555: 44   | 1 44       | 1 43      | 1 43         | 0            |
| 0.0002721  | -0.0003000 | 0.0000000 | 1336.4311500 | 1336.4308779 |
| 1556: 49   | 1 49       | 1 48      | 1 48         | 0            |
| 0.0007883  | -0.0003000 | 0.0000000 | 1337.6190400 | 1337.6182517 |
| 1557: 50   | 1 50       | 1 49      | 1 49         | 0            |
| 0.0006748  | -0.0003000 | 0.0000000 | 1337.8554700 | 1337.8547952 |

|       |            |            |           |   |    |   |    |   |              |              |
|-------|------------|------------|-----------|---|----|---|----|---|--------------|--------------|
| 1558: | 51         | 1          | 51        | 1 | 50 | 1 | 50 | 0 | 1338.0918300 | 1338.0910303 |
|       | 0.0007997  | -0.0003000 | 0.0000000 |   |    |   |    |   |              |              |
| 1559: | 52         | 1          | 52        | 1 | 51 | 1 | 51 | 0 | 1338.3274800 | 1338.3269571 |
|       | 0.0005229  | -0.0003000 | 0.0000000 |   |    |   |    |   |              |              |
| 1560: | 53         | 1          | 53        | 1 | 52 | 1 | 52 | 0 | 1338.5631400 | 1338.5625757 |
|       | 0.0005643  | -0.0003000 | 0.0000000 |   |    |   |    |   |              |              |
| 1561: | 54         | 1          | 54        | 1 | 53 | 1 | 53 | 0 | 1338.7983300 | 1338.7978858 |
|       | 0.0004442  | -0.0003000 | 0.0000000 |   |    |   |    |   |              |              |
| 1562: | 55         | 1          | 55        | 1 | 54 | 1 | 54 | 0 | 1339.0331900 | 1339.0328872 |
|       | 0.0003028  | -0.0003000 | 0.0000000 |   |    |   |    |   |              |              |
| 1563: | 56         | 1          | 56        | 1 | 55 | 1 | 55 | 0 | 1339.2677700 | 1339.2675793 |
|       | 0.0001907  | -0.0003000 | 0.0000000 |   |    |   |    |   |              |              |
| 1564: | 57         | 1          | 57        | 1 | 56 | 1 | 56 | 0 | 1339.5022200 | 1339.5019613 |
|       | 0.0002587  | -0.0003000 | 0.0000000 |   |    |   |    |   |              |              |
| 1565: | 58         | 1          | 58        | 1 | 57 | 1 | 57 | 0 | 1339.7361000 | 1339.7360326 |
|       | 0.0000674  | -0.0003000 | 0.0000000 |   |    |   |    |   |              |              |
| 1566: | 59         | 1          | 59        | 1 | 58 | 1 | 58 | 0 | 1339.9698300 | 1339.9697921 |
|       | 0.0000379  | -0.0003000 | 0.0000000 |   |    |   |    |   |              |              |
| 1567: | 60         | 1          | 60        | 1 | 59 | 1 | 59 | 0 | 1340.2033700 | 1340.2032388 |
|       | 0.0001312  | -0.0003000 | 0.0000000 |   |    |   |    |   |              |              |
| 1568: | 61         | 1          | 61        | 1 | 60 | 1 | 60 | 0 | 1340.4364700 | 1340.4363718 |
|       | 0.0000982  | -0.0003000 | 0.0000000 |   |    |   |    |   |              |              |
| 1569: | 62         | 1          | 62        | 1 | 61 | 1 | 61 | 0 | 1340.6694900 | 1340.6691897 |
|       | 0.0003003  | -0.0003000 | 0.0000000 |   |    |   |    |   |              |              |
| 1570: | 63         | 1          | 63        | 1 | 62 | 1 | 62 | 0 | 1340.9018200 | 1340.9016914 |
|       | 0.0001286  | -0.0003000 | 0.0000000 |   |    |   |    |   |              |              |
| 1571: | 64         | 1          | 64        | 1 | 63 | 1 | 63 | 0 | 1341.1340100 | 1341.1338756 |
|       | 0.0001344  | -0.0003000 | 0.0000000 |   |    |   |    |   |              |              |
| 1572: | 65         | 1          | 65        | 1 | 64 | 1 | 64 | 0 | 1341.3659300 | 1341.3657409 |
|       | 0.0001891  | -0.0003000 | 0.0000000 |   |    |   |    |   |              |              |
| 1573: | 66         | 1          | 66        | 1 | 65 | 1 | 65 | 0 | 1341.5974300 | 1341.5972861 |
|       | 0.0001439  | -0.0003000 | 0.0000000 |   |    |   |    |   |              |              |
| 1574: | 67         | 1          | 67        | 1 | 66 | 1 | 66 | 0 | 1341.8285800 | 1341.8285096 |
|       | 0.0000704  | -0.0003000 | 0.0000000 |   |    |   |    |   |              |              |
| 1575: | 68         | 1          | 68        | 1 | 67 | 1 | 67 | 0 | 1342.0594900 | 1342.0594101 |
|       | 0.0000799  | -0.0003000 | 0.0000000 |   |    |   |    |   |              |              |
| 1576: | 69         | 1          | 69        | 1 | 68 | 1 | 68 | 0 | 1342.2900100 | 1342.2899862 |
|       | 0.0000238  | -0.0003000 | 0.0000000 |   |    |   |    |   |              |              |
| 1577: | 70         | 1          | 70        | 1 | 69 | 1 | 69 | 0 | 1342.5204100 | 1342.5202363 |
|       | 0.0001737  | -0.0003000 | 0.0000000 |   |    |   |    |   |              |              |
| 1578: | 71         | 1          | 71        | 1 | 70 | 1 | 70 | 0 | 1342.7503500 | 1342.7501590 |
|       | 0.0001910  | -0.0003000 | 0.0000000 |   |    |   |    |   |              |              |
| 1579: | 72         | 1          | 72        | 1 | 71 | 1 | 71 | 0 | 1342.9798500 | 1342.9797527 |
|       | 0.0000973  | -0.0003000 | 0.0000000 |   |    |   |    |   |              |              |
| 1580: | 73         | 1          | 73        | 1 | 72 | 1 | 72 | 0 | 1343.2090500 | 1343.2090159 |
|       | 0.0000341  | -0.0003000 | 0.0000000 |   |    |   |    |   |              |              |
| 1581: | 74         | 1          | 74        | 1 | 73 | 1 | 73 | 0 | 1343.4380500 | 1343.4379471 |
|       | 0.0001029  | -0.0003000 | 0.0000000 |   |    |   |    |   |              |              |
| 1582: | 75         | 1          | 75        | 1 | 74 | 1 | 74 | 0 | 1343.6665000 | 1343.6665448 |
|       | -0.0000448 | -0.0003000 | 0.0000000 |   |    |   |    |   |              |              |
| 1583: | 76         | 1          | 76        | 1 | 75 | 1 | 75 | 0 | 1343.8949200 | 1343.8948074 |
|       | 0.0001126  | -0.0003000 | 0.0000000 |   |    |   |    |   |              |              |
| 1584: | 77         | 1          | 77        | 1 | 76 | 1 | 76 | 0 | 1344.1226900 | 1344.1227334 |
|       | -0.0000434 | -0.0003000 | 0.0000000 |   |    |   |    |   |              |              |
| 1585: | 78         | 1          | 78        | 1 | 77 | 1 | 77 | 0 | 1344.3504100 | 1344.3503211 |
|       | 0.0000889  | -0.0003000 | 0.0000000 |   |    |   |    |   |              |              |
| 1586: | 79         | 1          | 79        | 1 | 78 | 1 | 78 | 0 | 1344.5776400 | 1344.5775691 |
|       | 0.0000709  | -0.0003000 | 0.0000000 |   |    |   |    |   |              |              |
| 1587: | 80         | 1          | 80        | 1 | 79 | 1 | 79 | 0 | 1344.8046400 | 1344.8044757 |
|       | 0.0001643  | -0.0003000 | 0.0000000 |   |    |   |    |   |              |              |
| 1588: | 81         | 1          | 81        | 1 | 80 | 1 | 80 | 0 | 1345.0312100 | 1345.0310394 |
|       | 0.0001706  | -0.0003000 | 0.0000000 |   |    |   |    |   |              |              |
| 1589: | 82         | 1          | 82        | 1 | 81 | 1 | 81 | 0 | 1345.2572100 | 1345.2572587 |
|       | -0.0000487 | -0.0003000 | 0.0000000 |   |    |   |    |   |              |              |
| 1590: | 83         | 1          | 83        | 1 | 82 | 1 | 82 | 0 | 1345.4830700 | 1345.4831318 |

|            |            |           |              |              |
|------------|------------|-----------|--------------|--------------|
| -0.0000618 | -0.0003000 | 0.0000000 |              |              |
| 1591: 84   | 1 84       | 1 83      | 1 83         | 0            |
| 0.0001527  | -0.0003000 | 0.0000000 | 1345.7088100 | 1345.7086573 |
| 1592: 85   | 1 85       | 1 84      | 1 84         | 0            |
| 0.0001764  | -0.0003000 | 0.0000000 | 1345.9340100 | 1345.9338336 |
| 1593: 86   | 1 86       | 1 85      | 1 85         | 0            |
| -0.0000890 | -0.0003000 | 0.0000000 | 1346.1585700 | 1346.1586590 |
| 1594: 87   | 1 87       | 1 86      | 1 86         | 0            |
| -0.0001521 | -0.0003000 | 0.0000000 | 1346.3829800 | 1346.3831321 |
| 1595: 88   | 1 88       | 1 87      | 1 87         | 0            |
| -0.0002212 | -0.0003000 | 0.0000000 | 1346.6070300 | 1346.6072512 |
| 1596: 89   | 1 89       | 1 88      | 1 88         | 0            |
| -0.0000247 | -0.0003000 | 0.0000000 | 1346.8309900 | 1346.8310147 |
| 1597: 90   | 1 90       | 1 89      | 1 89         | 0            |
| 0.0000889  | -0.0003000 | 0.0000000 | 1347.0545100 | 1347.0544211 |
| 1598: 91   | 1 91       | 1 90      | 1 90         | 0            |
| 0.0000813  | -0.0003000 | 0.0000000 | 1347.2775500 | 1347.2774687 |
| 1599: 92   | 1 92       | 1 91      | 1 91         | 0            |
| -0.0002260 | -0.0003000 | 0.0000000 | 1347.4999300 | 1347.5001560 |
| 1600: 93   | 1 93       | 1 92      | 1 92         | 0            |
| 0.0002786  | -0.0003000 | 0.0000000 | 1347.7227600 | 1347.7224814 |
| 1601: 94   | 1 94       | 1 93      | 1 93         | 0            |
| 0.0000066  | -0.0003000 | 0.0000000 | 1347.9444500 | 1347.9444434 |
| 1602: 95   | 1 95       | 1 94      | 1 94         | 0            |
| -0.0001102 | -0.0003000 | 0.0000000 | 1348.1659300 | 1348.1660402 |
| 1603: 96   | 1 96       | 1 95      | 1 95         | 0            |
| -0.0001504 | -0.0003000 | 0.0000000 | 1348.3871200 | 1348.3872704 |
| 1604: 97   | 1 97       | 1 96      | 1 96         | 0            |
| 0.0002777  | -0.0003000 | 0.0000000 | 1348.6084100 | 1348.6081323 |
| 1605: 98   | 1 98       | 1 97      | 1 97         | 0            |
| 0.0001656  | -0.0003000 | 0.0000000 | 1348.8287900 | 1348.8286244 |
| 1606: 91   | 2 89       | 1 92      | 2 90         | 0            |
| -0.0000447 | -0.0003000 | 0.0000000 | 1301.2680500 | 1301.2680947 |
| 1607: 90   | 2 88       | 1 91      | 2 89         | 0            |
| -0.0002414 | -0.0003000 | 0.0000000 | 1301.5311100 | 1301.5313514 |
| 1608: 89   | 2 87       | 1 90      | 2 88         | 0            |
| 0.0011709  | -0.0003000 | 0.0000000 | 1301.7956900 | 1301.7945191 |
| 1609: 88   | 2 86       | 1 89      | 2 87         | 0            |
| 0.0011246  | -0.0003000 | 0.0000000 | 1302.0587200 | 1302.0575954 |
| 1610: 87   | 2 85       | 1 88      | 2 86         | 0            |
| 0.0007124  | -0.0003000 | 0.0000000 | 1302.3212900 | 1302.3205776 |
| 1611: 86   | 2 84       | 1 87      | 2 85         | 0            |
| 0.0003768  | -0.0003000 | 0.0000000 | 1302.5838400 | 1302.5834632 |
| 1612: 76   | 2 74       | 1 77      | 2 75         | 0            |
| -0.0002298 | -0.0003000 | 0.0000000 | 1305.2060000 | 1305.2062298 |
| 1613: 75   | 2 73       | 1 76      | 2 74         | 0            |
| -0.0003984 | -0.0003000 | 0.0000000 | 1305.4674000 | 1305.4677984 |
| 1614: 74   | 2 72       | 1 75      | 2 73         | 0            |
| -0.0002952 | -0.0003000 | 0.0000000 | 1305.7289200 | 1305.7292152 |
| 1615: 73   | 2 71       | 1 74      | 2 72         | 0            |
| -0.0000328 | -0.0003000 | 0.0000000 | 1305.9904400 | 1305.9904728 |
| 1616: 72   | 2 70       | 1 73      | 2 71         | 0            |
| 0.0004566  | -0.0003000 | 0.0000000 | 1306.2520200 | 1306.2515634 |
| 1617: 58   | 2 56       | 1 59      | 2 57         | 0            |
| 0.0002144  | -0.0003000 | 0.0000000 | 1309.8850400 | 1309.8848256 |
| 1618: 57   | 2 55       | 1 58      | 2 56         | 0            |
| 0.0000716  | -0.0003000 | 0.0000000 | 1310.1427100 | 1310.1426384 |
| 1619: 56   | 2 54       | 1 57      | 2 55         | 0            |
| 0.0001132  | -0.0003000 | 0.0000000 | 1310.4003900 | 1310.4002768 |
| 1620: 55   | 2 53       | 1 56      | 2 54         | 0            |
| 0.0001945  | -0.0003000 | 0.0000000 | 1310.6579700 | 1310.6577755 |
| 1621: 53   | 2 51       | 1 54      | 2 52         | 0            |
| 0.0000871  | -0.0003000 | 0.0000000 | 1311.1726200 | 1311.1725329 |
| 1622: 52   | 2 50       | 1 53      | 2 51         | 0            |
| -0.0000904 | -0.0003000 | 0.0000000 | 1311.4298100 | 1311.4299004 |

|            |            |           |    |   |    |   |    |   |              |              |
|------------|------------|-----------|----|---|----|---|----|---|--------------|--------------|
| 1623:      | 51         | 2         | 49 | 1 | 52 | 2 | 50 | 0 | 1311.6872700 | 1311.6873444 |
| -0.0000744 | -0.0003000 | 0.0000000 |    |   |    |   |    |   |              |              |
| 1624:      | 50         | 2         | 48 | 1 | 51 | 2 | 49 | 0 | 1311.9447600 | 1311.9449343 |
| -0.0001743 | -0.0003000 | 0.0000000 |    |   |    |   |    |   |              |              |
| 1625:      | 49         | 2         | 47 | 1 | 50 | 2 | 48 | 0 | 1312.2026400 | 1312.2027427 |
| -0.0001027 | -0.0003000 | 0.0000000 |    |   |    |   |    |   |              |              |
| 1626:      | 48         | 2         | 46 | 1 | 49 | 2 | 47 | 0 | 1312.4609200 | 1312.4608429 |
| 0.0000771  | -0.0003000 | 0.0000000 |    |   |    |   |    |   |              |              |
| 1627:      | 47         | 2         | 45 | 1 | 48 | 2 | 46 | 0 | 1312.7193800 | 1312.7193067 |
| 0.0000733  | -0.0003000 | 0.0000000 |    |   |    |   |    |   |              |              |
| 1628:      | 46         | 2         | 44 | 1 | 47 | 2 | 45 | 0 | 1312.9778900 | 1312.9782022 |
| -0.0003122 | -0.0003000 | 0.0000000 |    |   |    |   |    |   |              |              |
| 1629:      | 45         | 2         | 43 | 1 | 46 | 2 | 44 | 0 | 1313.2376500 | 1313.2375918 |
| 0.0000582  | -0.0003000 | 0.0000000 |    |   |    |   |    |   |              |              |
| 1630:      | 44         | 2         | 42 | 1 | 45 | 2 | 43 | 0 | 1313.4975600 | 1313.4975305 |
| 0.0000295  | -0.0003000 | 0.0000000 |    |   |    |   |    |   |              |              |
| 1631:      | 43         | 2         | 41 | 1 | 44 | 2 | 42 | 0 | 1313.7591500 | 1313.7580647 |
| 0.0010853  | -0.0003000 | 0.0000000 |    |   |    |   |    |   |              |              |
| 1632:      | 41         | 2         | 39 | 1 | 42 | 2 | 40 | 0 | 1314.2813600 | 1314.2810593 |
| 0.0003007  | -0.0003000 | 0.0000000 |    |   |    |   |    |   |              |              |
| 1633:      | 40         | 2         | 38 | 1 | 41 | 2 | 39 | 0 | 1314.5435200 | 1314.5435667 |
| -0.0000467 | -0.0003000 | 0.0000000 |    |   |    |   |    |   |              |              |
| 1634:      | 39         | 2         | 37 | 1 | 40 | 2 | 38 | 0 | 1314.8066200 | 1314.8067647 |
| -0.0001447 | -0.0003000 | 0.0000000 |    |   |    |   |    |   |              |              |
| 1635:      | 34         | 2         | 32 | 1 | 35 | 2 | 33 | 0 | 1316.1337100 | 1316.1330357 |
| 0.0006743  | -0.0003000 | 0.0000000 |    |   |    |   |    |   |              |              |
| 1636:      | 33         | 2         | 31 | 1 | 34 | 2 | 32 | 0 | 1316.4007800 | 1316.4002662 |
| 0.0005138  | -0.0003000 | 0.0000000 |    |   |    |   |    |   |              |              |
| 1637:      | 32         | 2         | 30 | 1 | 33 | 2 | 31 | 0 | 1316.6683700 | 1316.6681146 |
| 0.0002554  | -0.0003000 | 0.0000000 |    |   |    |   |    |   |              |              |
| 1638:      | 31         | 2         | 29 | 1 | 32 | 2 | 30 | 0 | 1316.9363300 | 1316.9365593 |
| -0.0002293 | -0.0003000 | 0.0000000 |    |   |    |   |    |   |              |              |
| 1639:      | 29         | 2         | 27 | 1 | 30 | 2 | 28 | 0 | 1317.4751900 | 1317.4751418 |
| 0.0000482  | -0.0003000 | 0.0000000 |    |   |    |   |    |   |              |              |
| 1640:      | 28         | 2         | 26 | 1 | 29 | 2 | 27 | 0 | 1317.7452100 | 1317.7452260 |
| -0.0000160 | -0.0003000 | 0.0000000 |    |   |    |   |    |   |              |              |
| 1641:      | 27         | 2         | 25 | 1 | 28 | 2 | 26 | 0 | 1318.0159600 | 1318.0157972 |
| 0.0001628  | -0.0003000 | 0.0000000 |    |   |    |   |    |   |              |              |
| 1642:      | 26         | 2         | 24 | 1 | 27 | 2 | 25 | 0 | 1318.2867000 | 1318.2868189 |
| -0.0001189 | -0.0003000 | 0.0000000 |    |   |    |   |    |   |              |              |
| 1643:      | 25         | 2         | 23 | 1 | 26 | 2 | 24 | 0 | 1318.5582800 | 1318.5582479 |
| 0.0000321  | -0.0003000 | 0.0000000 |    |   |    |   |    |   |              |              |
| 1644:      | 24         | 2         | 22 | 1 | 25 | 2 | 23 | 0 | 1318.8300400 | 1318.8300338 |
| 0.0000062  | -0.0003000 | 0.0000000 |    |   |    |   |    |   |              |              |
| 1645:      | 23         | 2         | 21 | 1 | 24 | 2 | 22 | 0 | 1319.1020700 | 1319.1021169 |
| -0.0000469 | -0.0003000 | 0.0000000 |    |   |    |   |    |   |              |              |
| 1646:      | 22         | 2         | 20 | 1 | 23 | 2 | 21 | 0 | 1319.3744100 | 1319.3744278 |
| -0.0000178 | -0.0003000 | 0.0000000 |    |   |    |   |    |   |              |              |
| 1647:      | 21         | 2         | 19 | 1 | 22 | 2 | 20 | 0 | 1319.6464600 | 1319.6468865 |
| -0.0004265 | -0.0003000 | 0.0000000 |    |   |    |   |    |   |              |              |
| 1648:      | 20         | 2         | 18 | 1 | 21 | 2 | 19 | 0 | 1319.9194000 | 1319.9194026 |
| -0.0000026 | -0.0003000 | 0.0000000 |    |   |    |   |    |   |              |              |
| 1649:      | 14         | 2         | 12 | 1 | 15 | 2 | 13 | 0 | 1321.5497000 | 1321.5498978 |
| -0.0001978 | -0.0003000 | 0.0000000 |    |   |    |   |    |   |              |              |
| 1650:      | 13         | 2         | 11 | 1 | 14 | 2 | 12 | 0 | 1321.8199800 | 1321.8199423 |
| 0.0000377  | -0.0003000 | 0.0000000 |    |   |    |   |    |   |              |              |
| 1651:      | 12         | 2         | 10 | 1 | 13 | 2 | 11 | 0 | 1322.0894100 | 1322.0892915 |
| 0.0001185  | -0.0003000 | 0.0000000 |    |   |    |   |    |   |              |              |
| 1652:      | 11         | 2         | 9  | 1 | 12 | 2 | 10 | 0 | 1322.3579600 | 1322.3579049 |
| 0.0000551  | -0.0003000 | 0.0000000 |    |   |    |   |    |   |              |              |
| 1653:      | 10         | 2         | 8  | 1 | 11 | 2 | 9  | 0 | 1322.6257600 | 1322.6257617 |
| -0.0000017 | -0.0003000 | 0.0000000 |    |   |    |   |    |   |              |              |
| 1654:      | 9          | 2         | 7  | 1 | 10 | 2 | 8  | 0 | 1322.8929700 | 1322.8928597 |
| 0.0001103  | -0.0003000 | 0.0000000 |    |   |    |   |    |   |              |              |
| 1655:      | 8          | 2         | 6  | 1 | 9  | 2 | 7  | 0 | 1323.1592400 | 1323.1592138 |

|            |            |           |              |              |
|------------|------------|-----------|--------------|--------------|
| 0.0000262  | -0.0003000 | 0.0000000 |              |              |
| 1656:      | 7          | 2         | 5            | 1 8 2 6 0    |
| 0.0000868  | -0.0003000 | 0.0000000 | 1323.4249400 | 1323.4248532 |
| 1657:      | 6          | 2         | 4            | 1 7 2 5 0    |
| 0.0000405  | -0.0003000 | 0.0000000 | 1323.6898600 | 1323.6898195 |
| 1658:      | 5          | 2         | 3            | 1 6 2 4 0    |
| -0.0008935 | -0.0003000 | 0.0000000 | 1323.9532700 | 1323.9541635 |
| 1659:      | 6          | 2         | 4            | 1 5 2 3 0    |
| 0.0000275  | -0.0003000 | 0.0000000 | 1327.1023600 | 1327.1023325 |
| 1660:      | 7          | 2         | 5            | 1 6 2 4 0    |
| 0.0000096  | -0.0003000 | 0.0000000 | 1327.3649900 | 1327.3649804 |
| 1661:      | 8          | 2         | 6            | 1 7 2 5 0    |
| 0.0000762  | -0.0003000 | 0.0000000 | 1327.6281200 | 1327.6280438 |
| 1662:      | 9          | 2         | 7            | 1 8 2 6 0    |
| 0.0001649  | -0.0003000 | 0.0000000 | 1327.8917600 | 1327.8915951 |
| 1663:      | 10         | 2         | 8            | 1 9 2 7 0    |
| 0.0000812  | -0.0003000 | 0.0000000 | 1328.1557800 | 1328.1556988 |
| 1664:      | 11         | 2         | 9            | 1 10 2 8 0   |
| 0.0001323  | -0.0003000 | 0.0000000 | 1328.4205400 | 1328.4204077 |
| 1665:      | 12         | 2         | 10           | 1 11 2 9 0   |
| 0.0000805  | -0.0003000 | 0.0000000 | 1328.6858400 | 1328.6857595 |
| 1666:      | 13         | 2         | 11           | 1 12 2 10 0  |
| 0.0000074  | -0.0003000 | 0.0000000 | 1328.9517800 | 1328.9517726 |
| 1667:      | 14         | 2         | 12           | 1 13 2 11 0  |
| -0.0001234 | -0.0003000 | 0.0000000 | 1329.2183200 | 1329.2184434 |
| 1668:      | 15         | 2         | 13           | 1 14 2 12 0  |
| -0.0003335 | -0.0003000 | 0.0000000 | 1329.4854100 | 1329.4857435 |
| 1669:      | 16         | 2         | 14           | 1 15 2 13 0  |
| -0.0001092 | -0.0003000 | 0.0000000 | 1329.7535100 | 1329.7536192 |
| 1670:      | 17         | 2         | 15           | 1 16 2 14 0  |
| -0.0000520 | -0.0003000 | 0.0000000 | 1330.0219400 | 1330.0219920 |
| 1671:      | 18         | 2         | 16           | 1 17 2 15 0  |
| -0.0001213 | -0.0003000 | 0.0000000 | 1330.2906400 | 1330.2907613 |
| 1672:      | 19         | 2         | 17           | 1 18 2 16 0  |
| -0.0001184 | -0.0003000 | 0.0000000 | 1330.5596900 | 1330.5598084 |
| 1673:      | 20         | 2         | 18           | 1 19 2 17 0  |
| -0.0000419 | -0.0003000 | 0.0000000 | 1330.8289600 | 1330.8290019 |
| 1674:      | 21         | 2         | 19           | 1 20 2 18 0  |
| 0.0000269  | -0.0003000 | 0.0000000 | 1331.0982300 | 1331.0982031 |
| 1675:      | 22         | 2         | 20           | 1 21 2 19 0  |
| 0.0000278  | -0.0003000 | 0.0000000 | 1331.3673000 | 1331.3672722 |
| 1676:      | 23         | 2         | 21           | 1 22 2 20 0  |
| 0.0000379  | -0.0003000 | 0.0000000 | 1331.6361100 | 1331.6360721 |
| 1677:      | 24         | 2         | 22           | 1 23 2 21 0  |
| 0.0000171  | -0.0003000 | 0.0000000 | 1331.9044900 | 1331.9044729 |
| 1678:      | 25         | 2         | 23           | 1 24 2 22 0  |
| 0.0000161  | -0.0003000 | 0.0000000 | 1332.1723700 | 1332.1723539 |
| 1679:      | 26         | 2         | 24           | 1 25 2 23 0  |
| -0.0003045 | -0.0003000 | 0.0000000 | 1332.4393000 | 1332.4396045 |
| 1680:      | 28         | 2         | 26           | 1 27 2 25 0  |
| -0.0000525 | -0.0003000 | 0.0000000 | 1332.9717700 | 1332.9718225 |
| 1681:      | 29         | 2         | 27           | 1 28 2 26 0  |
| 0.0001743  | -0.0003000 | 0.0000000 | 1333.2367900 | 1333.2366157 |
| 1682:      | 30         | 2         | 28           | 1 29 2 27 0  |
| -0.0001973 | -0.0003000 | 0.0000000 | 1333.5002300 | 1333.5004273 |
| 1683:      | 31         | 2         | 29           | 1 30 2 28 0  |
| -0.0001949 | -0.0003000 | 0.0000000 | 1333.7629900 | 1333.7631849 |
| 1684:      | 32         | 2         | 30           | 1 31 2 29 0  |
| -0.0002196 | -0.0003000 | 0.0000000 | 1334.0246000 | 1334.0248196 |
| 1685:      | 33         | 2         | 31           | 1 32 2 30 0  |
| -0.0003442 | -0.0003000 | 0.0000000 | 1334.2849200 | 1334.2852642 |
| 1686:      | 34         | 2         | 32           | 1 33 2 31 0  |
| -0.0001025 | -0.0003000 | 0.0000000 | 1334.5443500 | 1334.5444525 |
| 1687:      | 35         | 2         | 33           | 1 34 2 32 0  |
| 0.0000211  | -0.0003000 | 0.0000000 | 1334.8023400 | 1334.8023189 |

|            |            |           |      |   |              |              |
|------------|------------|-----------|------|---|--------------|--------------|
| 1688: 36   | 2 34       | 1 35      | 2 33 | 0 | 1335.0596900 | 1335.0587985 |
| 0.0008915  | -0.0003000 | 0.0000000 |      |   |              |              |
| 1689: 43   | 2 41       | 1 42      | 2 40 | 0 | 1336.8104400 | 1336.8104450 |
| -0.0000050 | -0.0003000 | 0.0000000 |      |   |              |              |
| 1690: 44   | 2 42       | 1 43      | 2 41 | 0 | 1337.0537700 | 1337.0539396 |
| -0.0001696 | -0.0003000 | 0.0000000 |      |   |              |              |
| 1691: 45   | 2 43       | 1 44      | 2 42 | 0 | 1337.2957400 | 1337.2957139 |
| 0.0000261  | -0.0003000 | 0.0000000 |      |   |              |              |
| 1692: 46   | 2 44       | 1 45      | 2 43 | 0 | 1337.5357300 | 1337.5357991 |
| -0.0000691 | -0.0003000 | 0.0000000 |      |   |              |              |
| 1693: 47   | 2 45       | 1 46      | 2 44 | 0 | 1337.7744000 | 1337.7742465 |
| 0.0001535  | -0.0003000 | 0.0000000 |      |   |              |              |
| 1694: 48   | 2 46       | 1 47      | 2 45 | 0 | 1338.0111100 | 1338.0111281 |
| -0.0000181 | -0.0003000 | 0.0000000 |      |   |              |              |
| 1695: 49   | 2 47       | 1 48      | 2 46 | 0 | 1338.2464600 | 1338.2465352 |
| -0.0000752 | -0.0003000 | 0.0000000 |      |   |              |              |
| 1696: 50   | 2 48       | 1 49      | 2 47 | 0 | 1338.4805300 | 1338.4805763 |
| -0.0000463 | -0.0003000 | 0.0000000 |      |   |              |              |
| 1697: 51   | 2 49       | 1 50      | 2 48 | 0 | 1338.7133200 | 1338.7133736 |
| -0.0000536 | -0.0003000 | 0.0000000 |      |   |              |              |
| 1698: 53   | 2 51       | 1 52      | 2 50 | 0 | 1339.1757400 | 1339.1757690 |
| -0.0000290 | -0.0003000 | 0.0000000 |      |   |              |              |
| 1699: 54   | 2 52       | 1 53      | 2 51 | 0 | 1339.4058600 | 1339.4056414 |
| 0.0002186  | -0.0003000 | 0.0000000 |      |   |              |              |
| 1700: 55   | 2 53       | 1 54      | 2 52 | 0 | 1339.6350100 | 1339.6348094 |
| 0.0002006  | -0.0003000 | 0.0000000 |      |   |              |              |
| 1701: 56   | 2 54       | 1 55      | 2 53 | 0 | 1339.8633900 | 1339.8633981 |
| -0.0000081 | -0.0003000 | 0.0000000 |      |   |              |              |
| 1702: 57   | 2 55       | 1 56      | 2 54 | 0 | 1340.0922400 | 1340.0915218 |
| 0.0007182  | -0.0003000 | 0.0000000 |      |   |              |              |
| 1703: 58   | 2 56       | 1 57      | 2 55 | 0 | 1340.3193200 | 1340.3192813 |
| 0.0000387  | -0.0003000 | 0.0000000 |      |   |              |              |
| 1704: 59   | 2 57       | 1 58      | 2 56 | 0 | 1340.5469300 | 1340.5467630 |
| 0.0001670  | -0.0003000 | 0.0000000 |      |   |              |              |
| 1705: 60   | 2 58       | 1 59      | 2 57 | 0 | 1340.7741600 | 1340.7740383 |
| 0.0001217  | -0.0003000 | 0.0000000 |      |   |              |              |
| 1706: 61   | 2 59       | 1 60      | 2 58 | 0 | 1341.0010300 | 1341.0011643 |
| -0.0001343 | -0.0003000 | 0.0000000 |      |   |              |              |
| 1707: 62   | 2 60       | 1 61      | 2 59 | 0 | 1341.2282900 | 1341.2281839 |
| 0.0001061  | -0.0003000 | 0.0000000 |      |   |              |              |
| 1708: 63   | 2 61       | 1 62      | 2 60 | 0 | 1341.4552100 | 1341.4551282 |
| 0.0000818  | -0.0003000 | 0.0000000 |      |   |              |              |
| 1709: 64   | 2 62       | 1 63      | 2 61 | 0 | 1341.6821400 | 1341.6820169 |
| 0.0001231  | -0.0003000 | 0.0000000 |      |   |              |              |
| 1710: 65   | 2 63       | 1 64      | 2 62 | 0 | 1341.9088300 | 1341.9088608 |
| -0.0000308 | -0.0003000 | 0.0000000 |      |   |              |              |
| 1711: 66   | 2 64       | 1 65      | 2 63 | 0 | 1342.1355400 | 1342.1356630 |
| -0.0001230 | -0.0003000 | 0.0000000 |      |   |              |              |
| 1712: 67   | 2 65       | 1 66      | 2 64 | 0 | 1342.3623700 | 1342.3624204 |
| -0.0000504 | -0.0003000 | 0.0000000 |      |   |              |              |
| 1713: 68   | 2 66       | 1 67      | 2 65 | 0 | 1342.5890200 | 1342.5891252 |
| -0.0001052 | -0.0003000 | 0.0000000 |      |   |              |              |
| 1714: 69   | 2 67       | 1 68      | 2 66 | 0 | 1342.8158300 | 1342.8157659 |
| 0.0000641  | -0.0003000 | 0.0000000 |      |   |              |              |
| 1715: 70   | 2 68       | 1 69      | 2 67 | 0 | 1343.0423400 | 1343.0423286 |
| 0.0000114  | -0.0003000 | 0.0000000 |      |   |              |              |
| 1716: 71   | 2 69       | 1 70      | 2 68 | 0 | 1343.2687300 | 1343.2687977 |
| -0.0000677 | -0.0003000 | 0.0000000 |      |   |              |              |
| 1717: 72   | 2 70       | 1 71      | 2 69 | 0 | 1343.4949600 | 1343.4951565 |
| -0.0001965 | -0.0003000 | 0.0000000 |      |   |              |              |
| 1718: 73   | 2 71       | 1 72      | 2 70 | 0 | 1343.7214000 | 1343.7213881 |
| 0.0000119  | -0.0003000 | 0.0000000 |      |   |              |              |
| 1719: 74   | 2 72       | 1 73      | 2 71 | 0 | 1343.9474400 | 1343.9474752 |
| -0.0000352 | -0.0003000 | 0.0000000 |      |   |              |              |
| 1720: 75   | 2 73       | 1 74      | 2 72 | 0 | 1344.1734200 | 1344.1734012 |

|            |            |           |              |              |
|------------|------------|-----------|--------------|--------------|
| 0.0000188  | -0.0003000 | 0.0000000 |              |              |
| 1721: 76   | 2 74       | 1 75      | 2 73         | 0            |
| 0.0000002  | -0.0003000 | 0.0000000 | 1344.3991500 | 1344.3991498 |
| 1722: 77   | 2 75       | 1 76      | 2 74         | 0            |
| -0.0001153 | -0.0003000 | 0.0000000 | 1344.6245900 | 1344.6247053 |
| 1723: 79   | 2 77       | 1 78      | 2 76         | 0            |
| 0.0000706  | -0.0003000 | 0.0000000 | 1345.0752500 | 1345.0751794 |
| 1724: 80   | 2 78       | 1 79      | 2 77         | 0            |
| -0.0003610 | -0.0003000 | 0.0000000 | 1345.2997100 | 1345.3000710 |
| 1725: 81   | 2 79       | 1 80      | 2 78         | 0            |
| -0.0001059 | -0.0003000 | 0.0000000 | 1345.5246100 | 1345.5247159 |
| 1726: 82   | 2 80       | 1 81      | 2 79         | 0            |
| 0.0004073  | -0.0003000 | 0.0000000 | 1345.7495100 | 1345.7491027 |
| 1727: 83   | 2 81       | 1 82      | 2 80         | 0            |
| 0.0005488  | -0.0003000 | 0.0000000 | 1345.9737700 | 1345.9732212 |
| 1728: 84   | 2 82       | 1 83      | 2 81         | 0            |
| 0.0001884  | -0.0003000 | 0.0000000 | 1346.1972500 | 1346.1970616 |
| 1729: 85   | 2 83       | 1 84      | 2 82         | 0            |
| -0.0003651 | -0.0003000 | 0.0000000 | 1346.4202500 | 1346.4206151 |
| 1730: 86   | 2 84       | 1 85      | 2 83         | 0            |
| -0.0000435 | -0.0003000 | 0.0000000 | 1346.6438300 | 1346.6438735 |
| 1731: 87   | 2 85       | 1 86      | 2 84         | 0            |
| -0.0003192 | -0.0003000 | 0.0000000 | 1346.8665100 | 1346.8668292 |
| 1732: 94   | 2 92       | 1 93      | 2 91         | 0            |
| -0.0010420 | -0.0003000 | 0.0000000 | 1348.4174800 | 1348.4185220 |
| 1733: 95   | 2 93       | 1 94      | 2 92         | 0            |
| -0.0007754 | -0.0003000 | 0.0000000 | 1348.6380700 | 1348.6388454 |
| 1734: 96   | 2 94       | 1 95      | 2 93         | 0            |
| -0.0003992 | -0.0003000 | 0.0000000 | 1348.8584200 | 1348.8588192 |
| 1735: 97   | 2 95       | 1 96      | 2 94         | 0            |
| -0.0005799 | -0.0003000 | 0.0000000 | 1349.0778600 | 1349.0784399 |
| 1736: 98   | 2 96       | 1 97      | 2 95         | 0            |
| -0.0005940 | -0.0003000 | 0.0000000 | 1349.2971100 | 1349.2977040 |
| 1737: 98   | 2 97       | 1 99      | 2 98         | 0            |
| 0.0001748  | -0.0003000 | 0.0000000 | 1299.6726500 | 1299.6724752 |
| 1738: 97   | 2 96       | 1 98      | 2 97         | 0            |
| -0.0005402 | -0.0003000 | 0.0000000 | 1299.9356700 | 1299.9362102 |
| 1739: 96   | 2 95       | 1 97      | 2 96         | 0            |
| 0.0003483  | -0.0003000 | 0.0000000 | 1300.2002200 | 1300.1998717 |
| 1740: 95   | 2 94       | 1 96      | 2 95         | 0            |
| 0.0004716  | -0.0003000 | 0.0000000 | 1300.4639300 | 1300.4634584 |
| 1741: 94   | 2 93       | 1 95      | 2 94         | 0            |
| -0.0000890 | -0.0003000 | 0.0000000 | 1300.7268800 | 1300.7269690 |
| 1742: 93   | 2 92       | 1 94      | 2 93         | 0            |
| -0.0001522 | -0.0003000 | 0.0000000 | 1300.9902500 | 1300.9904022 |
| 1743: 92   | 2 91       | 1 93      | 2 92         | 0            |
| -0.0002865 | -0.0003000 | 0.0000000 | 1301.2534700 | 1301.2537565 |
| 1744: 87   | 2 86       | 1 88      | 2 87         | 0            |
| -0.0001582 | -0.0003000 | 0.0000000 | 1302.5691400 | 1302.5692982 |
| 1745: 85   | 2 84       | 1 86      | 2 85         | 0            |
| -0.0000957 | -0.0003000 | 0.0000000 | 1303.0948200 | 1303.0949157 |
| 1746: 84   | 2 83       | 1 85      | 2 84         | 0            |
| -0.0004706 | -0.0003000 | 0.0000000 | 1303.3571200 | 1303.3575906 |
| 1747: 83   | 2 82       | 1 84      | 2 83         | 0            |
| -0.0002546 | -0.0003000 | 0.0000000 | 1303.6199200 | 1303.6201746 |
| 1748: 82   | 2 81       | 1 83      | 2 82         | 0            |
| -0.0005363 | -0.0003000 | 0.0000000 | 1303.8821300 | 1303.8826663 |
| 1749: 81   | 2 80       | 1 82      | 2 81         | 0            |
| -0.0003344 | -0.0003000 | 0.0000000 | 1304.1447300 | 1304.1450644 |
| 1750: 80   | 2 79       | 1 81      | 2 80         | 0            |
| 0.0002024  | -0.0003000 | 0.0000000 | 1304.4075700 | 1304.4073676 |
| 1751: 79   | 2 78       | 1 80      | 2 79         | 0            |
| -0.0003047 | -0.0003000 | 0.0000000 | 1304.6692700 | 1304.6695747 |
| 1752: 78   | 2 77       | 1 79      | 2 78         | 0            |
| -0.0003743 | -0.0003000 | 0.0000000 | 1304.9313100 | 1304.9316843 |

|            |            |           |      |   |              |              |
|------------|------------|-----------|------|---|--------------|--------------|
| 1753: 77   | 2 76       | 1 78      | 2 77 | 0 | 1305.1931900 | 1305.1936953 |
| -0.0005053 | -0.0003000 | 0.0000000 |      |   |              |              |
| 1754: 76   | 2 75       | 1 77      | 2 76 | 0 | 1305.4557000 | 1305.4556065 |
| 0.0000935  | -0.0003000 | 0.0000000 |      |   |              |              |
| 1755: 74   | 2 73       | 1 75      | 2 74 | 0 | 1305.9788200 | 1305.9791250 |
| -0.0003050 | -0.0003000 | 0.0000000 |      |   |              |              |
| 1756: 73   | 2 72       | 1 74      | 2 73 | 0 | 1306.2405600 | 1306.2407301 |
| -0.0001701 | -0.0003000 | 0.0000000 |      |   |              |              |
| 1757: 72   | 2 71       | 1 73      | 2 72 | 0 | 1306.5021100 | 1306.5022311 |
| -0.0001211 | -0.0003000 | 0.0000000 |      |   |              |              |
| 1758: 71   | 2 70       | 1 72      | 2 71 | 0 | 1306.7635700 | 1306.7636272 |
| -0.0000572 | -0.0003000 | 0.0000000 |      |   |              |              |
| 1759: 70   | 2 69       | 1 71      | 2 70 | 0 | 1307.0244900 | 1307.0249175 |
| -0.0004275 | -0.0003000 | 0.0000000 |      |   |              |              |
| 1760: 69   | 2 68       | 1 70      | 2 69 | 0 | 1307.2858000 | 1307.2861014 |
| -0.0003014 | -0.0003000 | 0.0000000 |      |   |              |              |
| 1761: 58   | 2 57       | 1 59      | 2 58 | 0 | 1310.1516700 | 1310.1520555 |
| -0.0003855 | -0.0003000 | 0.0000000 |      |   |              |              |
| 1762: 57   | 2 56       | 1 58      | 2 57 | 0 | 1310.4117100 | 1310.4119718 |
| -0.0002618 | -0.0003000 | 0.0000000 |      |   |              |              |
| 1763: 56   | 2 55       | 1 57      | 2 56 | 0 | 1310.6715500 | 1310.6717918 |
| -0.0002418 | -0.0003000 | 0.0000000 |      |   |              |              |
| 1764: 55   | 2 54       | 1 56      | 2 55 | 0 | 1310.9311300 | 1310.9315188 |
| -0.0003888 | -0.0003000 | 0.0000000 |      |   |              |              |
| 1765: 54   | 2 53       | 1 55      | 2 54 | 0 | 1311.1908800 | 1311.1911566 |
| -0.0002766 | -0.0003000 | 0.0000000 |      |   |              |              |
| 1766: 53   | 2 52       | 1 54      | 2 53 | 0 | 1311.4508100 | 1311.4507097 |
| 0.0001003  | -0.0003000 | 0.0000000 |      |   |              |              |
| 1767: 52   | 2 51       | 1 53      | 2 52 | 0 | 1311.7100200 | 1311.7101829 |
| -0.0001629 | -0.0003000 | 0.0000000 |      |   |              |              |
| 1768: 51   | 2 50       | 1 52      | 2 51 | 0 | 1311.9695900 | 1311.9695820 |
| 0.0000080  | -0.0003000 | 0.0000000 |      |   |              |              |
| 1769: 50   | 2 49       | 1 51      | 2 50 | 0 | 1312.2287600 | 1312.2289132 |
| -0.0001532 | -0.0003000 | 0.0000000 |      |   |              |              |
| 1770: 49   | 2 48       | 1 50      | 2 49 | 0 | 1312.4881000 | 1312.4881834 |
| -0.0000834 | -0.0003000 | 0.0000000 |      |   |              |              |
| 1771: 48   | 2 47       | 1 49      | 2 48 | 0 | 1312.7472300 | 1312.7474003 |
| -0.0001703 | -0.0003000 | 0.0000000 |      |   |              |              |
| 1772: 47   | 2 46       | 1 48      | 2 47 | 0 | 1313.0065000 | 1313.0065720 |
| -0.0000720 | -0.0003000 | 0.0000000 |      |   |              |              |
| 1773: 46   | 2 45       | 1 47      | 2 46 | 0 | 1313.2658200 | 1313.2657074 |
| 0.0001126  | -0.0003000 | 0.0000000 |      |   |              |              |
| 1774: 45   | 2 44       | 1 46      | 2 45 | 0 | 1313.5249900 | 1313.5248161 |
| 0.0001739  | -0.0003000 | 0.0000000 |      |   |              |              |
| 1775: 44   | 2 43       | 1 45      | 2 44 | 0 | 1313.7837500 | 1313.7839081 |
| -0.0001581 | -0.0003000 | 0.0000000 |      |   |              |              |
| 1776: 43   | 2 42       | 1 44      | 2 43 | 0 | 1314.0432500 | 1314.0429939 |
| 0.0002561  | -0.0003000 | 0.0000000 |      |   |              |              |
| 1777: 42   | 2 41       | 1 43      | 2 42 | 0 | 1314.3020500 | 1314.3020845 |
| -0.0000345 | -0.0003000 | 0.0000000 |      |   |              |              |
| 1778: 41   | 2 40       | 1 42      | 2 41 | 0 | 1314.5611400 | 1314.5611914 |
| -0.0000514 | -0.0003000 | 0.0000000 |      |   |              |              |
| 1779: 40   | 2 39       | 1 41      | 2 40 | 0 | 1314.8205000 | 1314.8203261 |
| 0.0001739  | -0.0003000 | 0.0000000 |      |   |              |              |
| 1780: 39   | 2 38       | 1 40      | 2 39 | 0 | 1315.0795700 | 1315.0795005 |
| 0.0000695  | -0.0003000 | 0.0000000 |      |   |              |              |
| 1781: 36   | 2 35       | 1 37      | 2 36 | 0 | 1315.8574100 | 1315.8573784 |
| 0.0000316  | -0.0003000 | 0.0000000 |      |   |              |              |
| 1782: 34   | 2 33       | 1 35      | 2 34 | 0 | 1316.3761100 | 1316.3763729 |
| -0.0002629 | -0.0003000 | 0.0000000 |      |   |              |              |
| 1783: 33   | 2 32       | 1 34      | 2 33 | 0 | 1316.6361200 | 1316.6360246 |
| 0.0000954  | -0.0003000 | 0.0000000 |      |   |              |              |
| 1784: 32   | 2 31       | 1 33      | 2 32 | 0 | 1316.8957700 | 1316.8957918 |
| -0.0000218 | -0.0003000 | 0.0000000 |      |   |              |              |
| 1785: 31   | 2 30       | 1 32      | 2 31 | 0 | 1317.1557000 | 1317.1556829 |

|            |            |           |              |              |  |
|------------|------------|-----------|--------------|--------------|--|
| 0.0000171  | -0.0003000 | 0.0000000 |              |              |  |
| 1786: 30   | 2 29 1 31  | 2 30 0    | 1317.4155700 | 1317.4157054 |  |
| -0.0001354 | -0.0003000 | 0.0000000 |              |              |  |
| 1787: 29   | 2 28 1 30  | 2 29 0    | 1317.6759600 | 1317.6758655 |  |
| 0.0000945  | -0.0003000 | 0.0000000 |              |              |  |
| 1788: 28   | 2 27 1 29  | 2 28 0    | 1317.9361100 | 1317.9361685 |  |
| -0.0000585 | -0.0003000 | 0.0000000 |              |              |  |
| 1789: 27   | 2 26 1 28  | 2 27 0    | 1318.1962100 | 1318.1966186 |  |
| -0.0004086 | -0.0003000 | 0.0000000 |              |              |  |
| 1790: 26   | 2 25 1 27  | 2 26 0    | 1318.4569300 | 1318.4572184 |  |
| -0.0002884 | -0.0003000 | 0.0000000 |              |              |  |
| 1791: 25   | 2 24 1 26  | 2 25 0    | 1318.7182500 | 1318.7179697 |  |
| 0.0002803  | -0.0003000 | 0.0000000 |              |              |  |
| 1792: 24   | 2 23 1 25  | 2 24 0    | 1318.9784900 | 1318.9788728 |  |
| -0.0003828 | -0.0003000 | 0.0000000 |              |              |  |
| 1793: 23   | 2 22 1 24  | 2 23 0    | 1319.2399200 | 1319.2399268 |  |
| -0.0000068 | -0.0003000 | 0.0000000 |              |              |  |
| 1794: 22   | 2 21 1 23  | 2 22 0    | 1319.5011500 | 1319.5011296 |  |
| 0.0000204  | -0.0003000 | 0.0000000 |              |              |  |
| 1795: 21   | 2 20 1 22  | 2 21 0    | 1319.7623000 | 1319.7624778 |  |
| -0.0001778 | -0.0003000 | 0.0000000 |              |              |  |
| 1796: 20   | 2 19 1 21  | 2 20 0    | 1320.0239500 | 1320.0239672 |  |
| -0.0000172 | -0.0003000 | 0.0000000 |              |              |  |
| 1797: 19   | 2 18 1 20  | 2 19 0    | 1320.2856900 | 1320.2855921 |  |
| 0.0000979  | -0.0003000 | 0.0000000 |              |              |  |
| 1798: 18   | 2 17 1 19  | 2 18 0    | 1320.5473800 | 1320.5473459 |  |
| 0.0000341  | -0.0003000 | 0.0000000 |              |              |  |
| 1799: 17   | 2 16 1 18  | 2 17 0    | 1320.8092500 | 1320.8092211 |  |
| 0.0000289  | -0.0003000 | 0.0000000 |              |              |  |
| 1800: 16   | 2 15 1 17  | 2 16 0    | 1321.0713200 | 1321.0712092 |  |
| 0.0001108  | -0.0003000 | 0.0000000 |              |              |  |
| 1801: 15   | 2 14 1 16  | 2 15 0    | 1321.3333600 | 1321.3333009 |  |
| 0.0000591  | -0.0003000 | 0.0000000 |              |              |  |
| 1802: 14   | 2 13 1 15  | 2 14 0    | 1321.5953800 | 1321.5954860 |  |
| -0.0001060 | -0.0003000 | 0.0000000 |              |              |  |
| 1803: 13   | 2 12 1 14  | 2 13 0    | 1321.8576800 | 1321.8577536 |  |
| -0.0000736 | -0.0003000 | 0.0000000 |              |              |  |
| 1804: 12   | 2 11 1 13  | 2 12 0    | 1322.1200700 | 1322.1200922 |  |
| -0.0000222 | -0.0003000 | 0.0000000 |              |              |  |
| 1805: 11   | 2 10 1 12  | 2 11 0    | 1322.3824800 | 1322.3824895 |  |
| -0.0000095 | -0.0003000 | 0.0000000 |              |              |  |
| 1806: 10   | 2 9 1 11   | 2 10 0    | 1322.6449700 | 1322.6449328 |  |
| 0.0000372  | -0.0003000 | 0.0000000 |              |              |  |
| 1807: 9    | 2 8 1 10   | 2 9 0     | 1322.9074500 | 1322.9074088 |  |
| 0.0000412  | -0.0003000 | 0.0000000 |              |              |  |
| 1808: 8    | 2 7 1 9    | 2 8 0     | 1323.1701300 | 1323.1699037 |  |
| 0.0002263  | -0.0003000 | 0.0000000 |              |              |  |
| 1809: 7    | 2 6 1 8    | 2 7 0     | 1323.4323600 | 1323.4324030 |  |
| -0.0000430 | -0.0003000 | 0.0000000 |              |              |  |
| 1810: 6    | 2 5 1 7    | 2 6 0     | 1323.6949300 | 1323.6948922 |  |
| 0.0000378  | -0.0003000 | 0.0000000 |              |              |  |
| 1811: 5    | 2 4 1 6    | 2 5 0     | 1323.9569700 | 1323.9573561 |  |
| -0.0003861 | -0.0003000 | 0.0000000 |              |              |  |
| 1812: 6    | 2 5 1 5    | 2 4 0     | 1327.0992400 | 1327.0989384 |  |
| 0.0003016  | -0.0003000 | 0.0000000 |              |              |  |
| 1813: 7    | 2 6 1 6    | 2 5 0     | 1327.3595200 | 1327.3595324 |  |
| -0.0000124 | -0.0003000 | 0.0000000 |              |              |  |
| 1814: 8    | 2 7 1 7    | 2 6 0     | 1327.6198200 | 1327.6198526 |  |
| -0.0000326 | -0.0003000 | 0.0000000 |              |              |  |
| 1815: 9    | 2 8 1 8    | 2 7 0     | 1327.8799700 | 1327.8798790 |  |
| 0.0000910  | -0.0003000 | 0.0000000 |              |              |  |
| 1816: 10   | 2 9 1 9    | 2 8 0     | 1328.1395700 | 1328.1395912 |  |
| -0.0000212 | -0.0003000 | 0.0000000 |              |              |  |
| 1817: 11   | 2 10 1 10  | 2 9 0     | 1328.3988900 | 1328.3989688 |  |
| -0.0000788 | -0.0003000 | 0.0000000 |              |              |  |

|            |            |           |    |   |    |   |    |   |              |              |
|------------|------------|-----------|----|---|----|---|----|---|--------------|--------------|
| 1818:      | 12         | 2         | 11 | 1 | 11 | 2 | 10 | 0 | 1328.6580500 | 1328.6579913 |
| 0.0000587  | -0.0003000 | 0.0000000 |    |   |    |   |    |   |              |              |
| 1819:      | 13         | 2         | 12 | 1 | 12 | 2 | 11 | 0 | 1328.9167000 | 1328.9166379 |
| 0.0000621  | -0.0003000 | 0.0000000 |    |   |    |   |    |   |              |              |
| 1820:      | 14         | 2         | 13 | 1 | 13 | 2 | 12 | 0 | 1329.1750700 | 1329.1748879 |
| 0.0001821  | -0.0003000 | 0.0000000 |    |   |    |   |    |   |              |              |
| 1821:      | 15         | 2         | 14 | 1 | 14 | 2 | 13 | 0 | 1329.4326100 | 1329.4327205 |
| -0.0001105 | -0.0003000 | 0.0000000 |    |   |    |   |    |   |              |              |
| 1822:      | 16         | 2         | 15 | 1 | 15 | 2 | 14 | 0 | 1329.6902300 | 1329.6901152 |
| 0.0001148  | -0.0003000 | 0.0000000 |    |   |    |   |    |   |              |              |
| 1823:      | 17         | 2         | 16 | 1 | 16 | 2 | 15 | 0 | 1329.9471600 | 1329.9470515 |
| 0.0001085  | -0.0003000 | 0.0000000 |    |   |    |   |    |   |              |              |
| 1824:      | 18         | 2         | 17 | 1 | 17 | 2 | 16 | 0 | 1330.2034500 | 1330.2035093 |
| -0.0000593 | -0.0003000 | 0.0000000 |    |   |    |   |    |   |              |              |
| 1825:      | 19         | 2         | 18 | 1 | 18 | 2 | 17 | 0 | 1330.4594700 | 1330.4594689 |
| 0.0000011  | -0.0003000 | 0.0000000 |    |   |    |   |    |   |              |              |
| 1826:      | 20         | 2         | 19 | 1 | 19 | 2 | 18 | 0 | 1330.7149800 | 1330.7149110 |
| 0.0000690  | -0.0003000 | 0.0000000 |    |   |    |   |    |   |              |              |
| 1827:      | 22         | 2         | 21 | 1 | 21 | 2 | 20 | 0 | 1331.2246900 | 1331.2241695 |
| 0.0005205  | -0.0003000 | 0.0000000 |    |   |    |   |    |   |              |              |
| 1828:      | 23         | 2         | 22 | 1 | 22 | 2 | 21 | 0 | 1331.4780900 | 1331.4779513 |
| 0.0001387  | -0.0003000 | 0.0000000 |    |   |    |   |    |   |              |              |
| 1829:      | 25         | 2         | 24 | 1 | 24 | 2 | 23 | 0 | 1331.9839200 | 1331.9837409 |
| 0.0001791  | -0.0003000 | 0.0000000 |    |   |    |   |    |   |              |              |
| 1830:      | 26         | 2         | 25 | 1 | 25 | 2 | 24 | 0 | 1332.2358700 | 1332.2357210 |
| 0.0001490  | -0.0003000 | 0.0000000 |    |   |    |   |    |   |              |              |
| 1831:      | 27         | 2         | 26 | 1 | 26 | 2 | 25 | 0 | 1332.4872700 | 1332.4870750 |
| 0.0001950  | -0.0003000 | 0.0000000 |    |   |    |   |    |   |              |              |
| 1832:      | 29         | 2         | 28 | 1 | 28 | 2 | 27 | 0 | 1332.9880400 | 1332.9878658 |
| 0.0001742  | -0.0003000 | 0.0000000 |    |   |    |   |    |   |              |              |
| 1833:      | 31         | 2         | 30 | 1 | 30 | 2 | 29 | 0 | 1333.4863600 | 1333.4860529 |
| 0.0003071  | -0.0003000 | 0.0000000 |    |   |    |   |    |   |              |              |
| 1834:      | 32         | 2         | 31 | 1 | 31 | 2 | 30 | 0 | 1333.7349200 | 1333.7341593 |
| 0.0007607  | -0.0003000 | 0.0000000 |    |   |    |   |    |   |              |              |
| 1835:      | 33         | 2         | 32 | 1 | 32 | 2 | 31 | 0 | 1333.9813100 | 1333.9816057 |
| -0.0002957 | -0.0003000 | 0.0000000 |    |   |    |   |    |   |              |              |
| 1836:      | 34         | 2         | 33 | 1 | 33 | 2 | 32 | 0 | 1334.2285000 | 1334.2283929 |
| 0.0001071  | -0.0003000 | 0.0000000 |    |   |    |   |    |   |              |              |
| 1837:      | 35         | 2         | 34 | 1 | 34 | 2 | 33 | 0 | 1334.4746100 | 1334.4745240 |
| 0.0000860  | -0.0003000 | 0.0000000 |    |   |    |   |    |   |              |              |
| 1838:      | 36         | 2         | 35 | 1 | 35 | 2 | 34 | 0 | 1334.7200500 | 1334.7200036 |
| 0.0000464  | -0.0003000 | 0.0000000 |    |   |    |   |    |   |              |              |
| 1839:      | 37         | 2         | 36 | 1 | 36 | 2 | 35 | 0 | 1334.9648100 | 1334.9648381 |
| -0.0000281 | -0.0003000 | 0.0000000 |    |   |    |   |    |   |              |              |
| 1840:      | 38         | 2         | 37 | 1 | 37 | 2 | 36 | 0 | 1335.2089300 | 1335.2090356 |
| -0.0001056 | -0.0003000 | 0.0000000 |    |   |    |   |    |   |              |              |
| 1841:      | 39         | 2         | 38 | 1 | 38 | 2 | 37 | 0 | 1335.4526300 | 1335.4526057 |
| 0.0000243  | -0.0003000 | 0.0000000 |    |   |    |   |    |   |              |              |
| 1842:      | 40         | 2         | 39 | 1 | 39 | 2 | 38 | 0 | 1335.6954100 | 1335.6955592 |
| -0.0001492 | -0.0003000 | 0.0000000 |    |   |    |   |    |   |              |              |
| 1843:      | 41         | 2         | 40 | 1 | 40 | 2 | 39 | 0 | 1335.9375800 | 1335.9379082 |
| -0.0003282 | -0.0003000 | 0.0000000 |    |   |    |   |    |   |              |              |
| 1844:      | 42         | 2         | 41 | 1 | 41 | 2 | 40 | 0 | 1336.1794800 | 1336.1796656 |
| -0.0001856 | -0.0003000 | 0.0000000 |    |   |    |   |    |   |              |              |
| 1845:      | 43         | 2         | 42 | 1 | 42 | 2 | 41 | 0 | 1336.4209000 | 1336.4208450 |
| 0.0000550  | -0.0003000 | 0.0000000 |    |   |    |   |    |   |              |              |
| 1846:      | 44         | 2         | 43 | 1 | 43 | 2 | 42 | 0 | 1336.6616200 | 1336.6614609 |
| 0.0001591  | -0.0003000 | 0.0000000 |    |   |    |   |    |   |              |              |
| 1847:      | 45         | 2         | 44 | 1 | 44 | 2 | 43 | 0 | 1336.9015700 | 1336.9015278 |
| 0.0000422  | -0.0003000 | 0.0000000 |    |   |    |   |    |   |              |              |
| 1848:      | 46         | 2         | 45 | 1 | 45 | 2 | 44 | 0 | 1337.1411400 | 1337.1410605 |
| 0.0000795  | -0.0003000 | 0.0000000 |    |   |    |   |    |   |              |              |
| 1849:      | 47         | 2         | 46 | 1 | 46 | 2 | 45 | 0 | 1337.3800000 | 1337.3800739 |
| -0.0000739 | -0.0003000 | 0.0000000 |    |   |    |   |    |   |              |              |
| 1850:      | 48         | 2         | 47 | 1 | 47 | 2 | 46 | 0 | 1337.6187100 | 1337.6185826 |

|            |            |           |              |              |
|------------|------------|-----------|--------------|--------------|
| 0.0001274  | -0.0003000 | 0.0000000 |              |              |
| 1851: 49   | 2 48       | 1 48      | 2 47         | 0            |
| -0.0007109 | -0.0003000 | 0.0000000 | 1337.8558900 | 1337.8566009 |
| 1852: 51   | 2 50       | 1 50      | 2 49         | 0            |
| 0.0000181  | -0.0003000 | 0.0000000 | 1338.3312400 | 1338.3312219 |
| 1853: 52   | 2 51       | 1 51      | 2 50         | 0            |
| -0.0000606 | -0.0003000 | 0.0000000 | 1338.5677900 | 1338.5678506 |
| 1854: 53   | 2 52       | 1 52      | 2 51         | 0            |
| -0.0000511 | -0.0003000 | 0.0000000 | 1338.8039900 | 1338.8040411 |
| 1855: 54   | 2 53       | 1 53      | 2 52         | 0            |
| 0.0001452  | -0.0003000 | 0.0000000 | 1339.0399500 | 1339.0398048 |
| 1856: 55   | 2 54       | 1 54      | 2 53         | 0            |
| 0.0000578  | -0.0003000 | 0.0000000 | 1339.2752100 | 1339.2751522 |
| 1857: 56   | 2 55       | 1 55      | 2 54         | 0            |
| -0.0000129 | -0.0003000 | 0.0000000 | 1339.5100800 | 1339.5100929 |
| 1858: 57   | 2 56       | 1 56      | 2 55         | 0            |
| 0.0001740  | -0.0003000 | 0.0000000 | 1339.7448100 | 1339.7446360 |
| 1859: 58   | 2 57       | 1 57      | 2 56         | 0            |
| -0.0001295 | -0.0003000 | 0.0000000 | 1339.9786600 | 1339.9787895 |
| 1860: 59   | 2 58       | 1 58      | 2 57         | 0            |
| 0.0000792  | -0.0003000 | 0.0000000 | 1340.2126400 | 1340.2125608 |
| 1861: 62   | 2 61       | 1 61      | 2 60         | 0            |
| -0.0000436 | -0.0003000 | 0.0000000 | 1340.9116000 | 1340.9116436 |
| 1862: 63   | 2 62       | 1 62      | 2 61         | 0            |
| -0.0000148 | -0.0003000 | 0.0000000 | 1341.1439300 | 1341.1439448 |
| 1863: 64   | 2 63       | 1 63      | 2 62         | 0            |
| -0.0000098 | -0.0003000 | 0.0000000 | 1341.3758800 | 1341.3758898 |
| 1864: 65   | 2 64       | 1 64      | 2 63         | 0            |
| 0.0000581  | -0.0003000 | 0.0000000 | 1341.6075400 | 1341.6074819 |
| 1865: 66   | 2 65       | 1 65      | 2 64         | 0            |
| 0.0000961  | -0.0003000 | 0.0000000 | 1341.8388200 | 1341.8387239 |
| 1866: 67   | 2 66       | 1 66      | 2 65         | 0            |
| 0.0009118  | -0.0003000 | 0.0000000 | 1342.0705300 | 1342.0696182 |
| 1867: 73   | 2 72       | 1 72      | 2 71         | 0            |
| 0.0005688  | -0.0003000 | 0.0000000 | 1343.4483300 | 1343.4477612 |
| 1868: 74   | 2 73       | 1 73      | 2 72         | 0            |
| 0.0004458  | -0.0003000 | 0.0000000 | 1343.6767000 | 1343.6762542 |
| 1869: 75   | 2 74       | 1 74      | 2 73         | 0            |
| 0.0003947  | -0.0003000 | 0.0000000 | 1343.9048000 | 1343.9044053 |
| 1870: 76   | 2 75       | 1 75      | 2 74         | 0            |
| 0.0003559  | -0.0003000 | 0.0000000 | 1344.1325700 | 1344.1322141 |
| 1871: 77   | 2 76       | 1 76      | 2 75         | 0            |
| 0.0002899  | -0.0003000 | 0.0000000 | 1344.3599700 | 1344.3596801 |
| 1872: 78   | 2 77       | 1 77      | 2 76         | 0            |
| -0.0000825 | -0.0003000 | 0.0000000 | 1344.5867200 | 1344.5868025 |
| 1873: 79   | 2 78       | 1 78      | 2 77         | 0            |
| 0.0002095  | -0.0003000 | 0.0000000 | 1344.8137900 | 1344.8135805 |
| 1874: 80   | 2 79       | 1 79      | 2 78         | 0            |
| 0.0001568  | -0.0003000 | 0.0000000 | 1345.0401700 | 1345.0400132 |
| 1875: 81   | 2 80       | 1 80      | 2 79         | 0            |
| 0.0002905  | -0.0003000 | 0.0000000 | 1345.2663900 | 1345.2660995 |
| 1876: 82   | 2 81       | 1 81      | 2 80         | 0            |
| 0.0001417  | -0.0003000 | 0.0000000 | 1345.4919800 | 1345.4918383 |
| 1877: 83   | 2 82       | 1 82      | 2 81         | 0            |
| 0.0001916  | -0.0003000 | 0.0000000 | 1345.7174200 | 1345.7172284 |
| 1878: 84   | 2 83       | 1 83      | 2 82         | 0            |
| 0.0001413  | -0.0003000 | 0.0000000 | 1345.9424100 | 1345.9422687 |
| 1879: 85   | 2 84       | 1 84      | 2 83         | 0            |
| 0.0002524  | -0.0003000 | 0.0000000 | 1346.1672100 | 1346.1669576 |
| 1880: 86   | 2 85       | 1 85      | 2 84         | 0            |
| 0.0003560  | -0.0003000 | 0.0000000 | 1346.3916500 | 1346.3912940 |
| 1881: 87   | 2 86       | 1 86      | 2 85         | 0            |
| 0.0001437  | -0.0003000 | 0.0000000 | 1346.6154200 | 1346.6152763 |
| 1882: 88   | 2 87       | 1 87      | 2 86         | 0            |
| 0.0004468  | -0.0003000 | 0.0000000 | 1346.8393500 | 1346.8389032 |

|            |            |           |      |   |              |              |
|------------|------------|-----------|------|---|--------------|--------------|
| 1883: 89   | 2 88       | 1 88      | 2 87 | 0 | 1347.0624000 | 1347.0621731 |
| 0.0002269  | -0.0003000 | 0.0000000 |      |   |              |              |
| 1884: 90   | 2 89       | 1 89      | 2 88 | 0 | 1347.2853000 | 1347.2850847 |
| 0.0002153  | -0.0003000 | 0.0000000 |      |   |              |              |
| 1885: 91   | 2 90       | 1 90      | 2 89 | 0 | 1347.5074500 | 1347.5076363 |
| -0.0001863 | -0.0003000 | 0.0000000 |      |   |              |              |
| 1886: 92   | 2 91       | 1 91      | 2 90 | 0 | 1347.7297700 | 1347.7298264 |
| -0.0000564 | -0.0003000 | 0.0000000 |      |   |              |              |
| 1887: 93   | 2 92       | 1 92      | 2 91 | 0 | 1347.9514800 | 1347.9516535 |
| -0.0001735 | -0.0003000 | 0.0000000 |      |   |              |              |
| 1888: 94   | 2 93       | 1 93      | 2 92 | 0 | 1348.1729900 | 1348.1731160 |
| -0.0001260 | -0.0003000 | 0.0000000 |      |   |              |              |
| 1889: 95   | 2 94       | 1 94      | 2 93 | 0 | 1348.3935800 | 1348.3942123 |
| -0.0006323 | -0.0003000 | 0.0000000 |      |   |              |              |
| 1890: 96   | 2 95       | 1 95      | 2 94 | 0 | 1348.6143500 | 1348.6149408 |
| -0.0005908 | -0.0003000 | 0.0000000 |      |   |              |              |
| 1891: 97   | 2 96       | 1 96      | 2 95 | 0 | 1348.8349100 | 1348.8353000 |
| -0.0003900 | -0.0003000 | 0.0000000 |      |   |              |              |
| 1892: 86   | 3 83       | 1 87      | 3 84 | 0 | 1302.3433500 | 1302.3432353 |
| 0.0001147  | -0.0003000 | 0.0000000 |      |   |              |              |
| 1893: 85   | 3 82       | 1 86      | 3 83 | 0 | 1302.6053400 | 1302.6054114 |
| -0.0000714 | -0.0003000 | 0.0000000 |      |   |              |              |
| 1894: 84   | 3 81       | 1 85      | 3 82 | 0 | 1302.8676400 | 1302.8674075 |
| 0.0002325  | -0.0003000 | 0.0000000 |      |   |              |              |
| 1895: 83   | 3 80       | 1 84      | 3 81 | 0 | 1303.1298600 | 1303.1292148 |
| 0.0006452  | -0.0003000 | 0.0000000 |      |   |              |              |
| 1896: 82   | 3 79       | 1 83      | 3 80 | 0 | 1303.3906000 | 1303.3908253 |
| -0.0002253 | -0.0003000 | 0.0000000 |      |   |              |              |
| 1897: 81   | 3 78       | 1 82      | 3 79 | 0 | 1303.6520100 | 1303.6522313 |
| -0.0002213 | -0.0003000 | 0.0000000 |      |   |              |              |
| 1898: 80   | 3 77       | 1 81      | 3 78 | 0 | 1303.9137100 | 1303.9134262 |
| 0.0002838  | -0.0003000 | 0.0000000 |      |   |              |              |
| 1899: 79   | 3 76       | 1 80      | 3 77 | 0 | 1304.1744500 | 1304.1744050 |
| 0.0000450  | -0.0003000 | 0.0000000 |      |   |              |              |
| 1900: 78   | 3 75       | 1 79      | 3 76 | 0 | 1304.4350900 | 1304.4351646 |
| -0.0000746 | -0.0003000 | 0.0000000 |      |   |              |              |
| 1901: 77   | 3 74       | 1 78      | 3 75 | 0 | 1304.6953900 | 1304.6957047 |
| -0.0003147 | -0.0003000 | 0.0000000 |      |   |              |              |
| 1902: 76   | 3 73       | 1 77      | 3 74 | 0 | 1304.9565700 | 1304.9560283 |
| 0.0005417  | -0.0003000 | 0.0000000 |      |   |              |              |
| 1903: 75   | 3 72       | 1 76      | 3 73 | 0 | 1305.2162800 | 1305.2161426 |
| 0.0001374  | -0.0003000 | 0.0000000 |      |   |              |              |
| 1904: 71   | 3 68       | 1 72      | 3 69 | 0 | 1306.2555500 | 1306.2548264 |
| 0.0007236  | -0.0003000 | 0.0000000 |      |   |              |              |
| 1905: 59   | 3 56       | 1 60      | 3 57 | 0 | 1309.3766600 | 1309.3763253 |
| 0.0003347  | -0.0003000 | 0.0000000 |      |   |              |              |
| 1906: 58   | 3 55       | 1 59      | 3 56 | 0 | 1309.6392600 | 1309.6388355 |
| 0.0004245  | -0.0003000 | 0.0000000 |      |   |              |              |
| 1907: 57   | 3 54       | 1 58      | 3 55 | 0 | 1309.9018600 | 1309.9019347 |
| -0.0000747 | -0.0003000 | 0.0000000 |      |   |              |              |
| 1908: 56   | 3 53       | 1 57      | 3 54 | 0 | 1310.1659200 | 1310.1656498 |
| 0.0002702  | -0.0003000 | 0.0000000 |      |   |              |              |
| 1909: 55   | 3 52       | 1 56      | 3 53 | 0 | 1310.4301100 | 1310.4300014 |
| 0.0001086  | -0.0003000 | 0.0000000 |      |   |              |              |
| 1910: 54   | 3 51       | 1 55      | 3 52 | 0 | 1310.6951600 | 1310.6950046 |
| 0.0001554  | -0.0003000 | 0.0000000 |      |   |              |              |
| 1911: 53   | 3 50       | 1 54      | 3 51 | 0 | 1310.9607700 | 1310.9606691 |
| 0.0001009  | -0.0003000 | 0.0000000 |      |   |              |              |
| 1912: 51   | 3 48       | 1 52      | 3 49 | 0 | 1311.4940600 | 1311.4939991 |
| 0.0000609  | -0.0003000 | 0.0000000 |      |   |              |              |
| 1913: 50   | 3 47       | 1 51      | 3 48 | 0 | 1311.7618400 | 1311.7616641 |
| 0.0001759  | -0.0003000 | 0.0000000 |      |   |              |              |
| 1914: 49   | 3 46       | 1 50      | 3 47 | 0 | 1312.0300700 | 1312.0299901 |
| 0.0000799  | -0.0003000 | 0.0000000 |      |   |              |              |
| 1915: 48   | 3 45       | 1 49      | 3 46 | 0 | 1312.2989800 | 1312.2989694 |

|            |            |           |              |              |
|------------|------------|-----------|--------------|--------------|
| 0.0000106  | -0.0003000 | 0.0000000 |              |              |
| 1916: 46   | 3 43       | 1 47      | 3 44         | 0            |
| -0.0000536 | -0.0003000 | 0.0000000 | 1312.8387900 | 1312.8388436 |
| 1917: 45   | 3 42       | 1 46      | 3 43         | 0            |
| 0.0000713  | -0.0003000 | 0.0000000 | 1313.1097800 | 1313.1097087 |
| 1918: 44   | 3 41       | 1 45      | 3 42         | 0            |
| -0.0000065 | -0.0003000 | 0.0000000 | 1313.3811600 | 1313.3811665 |
| 1919: 43   | 3 40       | 1 44      | 3 41         | 0            |
| 0.0001084  | -0.0003000 | 0.0000000 | 1313.6533000 | 1313.6531916 |
| 1920: 42   | 3 39       | 1 43      | 3 40         | 0            |
| 0.0003466  | -0.0003000 | 0.0000000 | 1313.9261000 | 1313.9257534 |
| 1921: 41   | 3 38       | 1 42      | 3 39         | 0            |
| 0.0009758  | -0.0003000 | 0.0000000 | 1314.1997900 | 1314.1988142 |
| 1922: 40   | 3 37       | 1 41      | 3 38         | 0            |
| 0.0000911  | -0.0003000 | 0.0000000 | 1314.4724200 | 1314.4723289 |
| 1923: 39   | 3 36       | 1 40      | 3 37         | 0            |
| 0.0000459  | -0.0003000 | 0.0000000 | 1314.7462900 | 1314.7462441 |
| 1924: 38   | 3 35       | 1 39      | 3 36         | 0            |
| 0.0002127  | -0.0003000 | 0.0000000 | 1315.0207100 | 1315.0204973 |
| 1925: 31   | 3 28       | 1 32      | 3 29         | 0            |
| -0.0000083 | -0.0003000 | 0.0000000 | 1316.9429300 | 1316.9429383 |
| 1926: 30   | 3 27       | 1 31      | 3 28         | 0            |
| -0.0000912 | -0.0003000 | 0.0000000 | 1317.2167900 | 1317.2168812 |
| 1927: 29   | 3 26       | 1 30      | 3 27         | 0            |
| -0.0001316 | -0.0003000 | 0.0000000 | 1317.4902700 | 1317.4904016 |
| 1928: 28   | 3 25       | 1 29      | 3 26         | 0            |
| 0.0000623  | -0.0003000 | 0.0000000 | 1317.7635000 | 1317.7634377 |
| 1929: 27   | 3 24       | 1 28      | 3 25         | 0            |
| 0.0003701  | -0.0003000 | 0.0000000 | 1318.0363100 | 1318.0359399 |
| 1930: 26   | 3 23       | 1 27      | 3 24         | 0            |
| -0.0000322 | -0.0003000 | 0.0000000 | 1318.3078400 | 1318.3078722 |
| 1931: 25   | 3 22       | 1 26      | 3 23         | 0            |
| -0.0000610 | -0.0003000 | 0.0000000 | 1318.5791500 | 1318.5792110 |
| 1932: 24   | 3 21       | 1 25      | 3 22         | 0            |
| 0.0000851  | -0.0003000 | 0.0000000 | 1318.8500300 | 1318.8499449 |
| 1933: 23   | 3 20       | 1 24      | 3 21         | 0            |
| -0.0002432 | -0.0003000 | 0.0000000 | 1319.1198300 | 1319.1200732 |
| 1934: 22   | 3 19       | 1 23      | 3 20         | 0            |
| 0.0003962  | -0.0003000 | 0.0000000 | 1319.3900000 | 1319.3896038 |
| 1935: 21   | 3 18       | 1 22      | 3 19         | 0            |
| 0.0000278  | -0.0003000 | 0.0000000 | 1319.6585800 | 1319.6585522 |
| 1936: 20   | 3 17       | 1 21      | 3 18         | 0            |
| 0.0000506  | -0.0003000 | 0.0000000 | 1319.9269900 | 1319.9269394 |
| 1937: 17   | 3 14       | 1 18      | 3 15         | 0            |
| 0.0001062  | -0.0003000 | 0.0000000 | 1320.7291000 | 1320.7289938 |
| 1938: 16   | 3 13       | 1 17      | 3 14         | 0            |
| 0.0000454  | -0.0003000 | 0.0000000 | 1320.9954500 | 1320.9954046 |
| 1939: 15   | 3 12       | 1 16      | 3 13         | 0            |
| 0.0002567  | -0.0003000 | 0.0000000 | 1321.2616500 | 1321.2613933 |
| 1940: 11   | 3 8        | 1 12      | 3 9          | 0            |
| 0.0004469  | -0.0003000 | 0.0000000 | 1322.3221100 | 1322.3216631 |
| 1941: 10   | 3 7        | 1 11      | 3 8          | 0            |
| 0.0002202  | -0.0003000 | 0.0000000 | 1322.5861500 | 1322.5859298 |
| 1942: 9    | 3 6        | 1 10      | 3 7          | 0            |
| 0.0000619  | -0.0003000 | 0.0000000 | 1322.8499800 | 1322.8499181 |
| 1943: 8    | 3 5        | 1 9       | 3 6          | 0            |
| 0.0001638  | -0.0003000 | 0.0000000 | 1323.1138100 | 1323.1136462 |
| 1944: 7    | 3 4        | 1 8       | 3 5          | 0            |
| 0.0000296  | -0.0003000 | 0.0000000 | 1323.3771600 | 1323.3771304 |
| 1945: 6    | 3 3        | 1 7       | 3 4          | 0            |
| 0.0001144  | -0.0003000 | 0.0000000 | 1323.6405000 | 1323.6403856 |
| 1946: 5    | 3 2        | 1 6       | 3 3          | 0            |
| -0.0000556 | -0.0003000 | 0.0000000 | 1323.9033700 | 1323.9034256 |
| 1947: 4    | 3 1        | 1 5       | 3 2          | 0            |
| 0.0001273  | -0.0003000 | 0.0000000 | 1324.1663900 | 1324.1662627 |

|            |            |           |    |   |    |   |    |   |              |              |
|------------|------------|-----------|----|---|----|---|----|---|--------------|--------------|
| 1948:      | 3          | 3         | 0  | 1 | 4  | 3 | 1  | 0 | 1324.4287300 | 1324.4289084 |
| -0.0001784 | -0.0003000 | 0.0000000 |    |   |    |   |    |   |              |              |
| 1949:      | 4          | 3         | 1  | 1 | 3  | 3 | 0  | 0 | 1326.5244700 | 1326.5244029 |
| 0.0000671  | -0.0003000 | 0.0000000 |    |   |    |   |    |   |              |              |
| 1950:      | 5          | 3         | 2  | 1 | 4  | 3 | 1  | 0 | 1326.7857700 | 1326.7857823 |
| -0.0000123 | -0.0003000 | 0.0000000 |    |   |    |   |    |   |              |              |
| 1951:      | 6          | 3         | 3  | 1 | 5  | 3 | 2  | 0 | 1327.0470900 | 1327.0470761 |
| 0.0000139  | -0.0003000 | 0.0000000 |    |   |    |   |    |   |              |              |
| 1952:      | 7          | 3         | 4  | 1 | 6  | 3 | 3  | 0 | 1327.3083800 | 1327.3082989 |
| 0.0000811  | -0.0003000 | 0.0000000 |    |   |    |   |    |   |              |              |
| 1953:      | 8          | 3         | 5  | 1 | 7  | 3 | 4  | 0 | 1327.5695100 | 1327.5694670 |
| 0.0000430  | -0.0003000 | 0.0000000 |    |   |    |   |    |   |              |              |
| 1954:      | 9          | 3         | 6  | 1 | 8  | 3 | 5  | 0 | 1327.8307100 | 1327.8305984 |
| 0.0001116  | -0.0003000 | 0.0000000 |    |   |    |   |    |   |              |              |
| 1955:      | 10         | 3         | 7  | 1 | 9  | 3 | 6  | 0 | 1328.0915700 | 1328.0917137 |
| -0.0001437 | -0.0003000 | 0.0000000 |    |   |    |   |    |   |              |              |
| 1956:      | 11         | 3         | 8  | 1 | 10 | 3 | 7  | 0 | 1328.3524500 | 1328.3528359 |
| -0.0003859 | -0.0003000 | 0.0000000 |    |   |    |   |    |   |              |              |
| 1957:      | 12         | 3         | 9  | 1 | 11 | 3 | 8  | 0 | 1328.6137400 | 1328.6139909 |
| -0.0002509 | -0.0003000 | 0.0000000 |    |   |    |   |    |   |              |              |
| 1958:      | 16         | 3         | 13 | 1 | 15 | 3 | 12 | 0 | 1329.6596400 | 1329.6595690 |
| 0.0000710  | -0.0003000 | 0.0000000 |    |   |    |   |    |   |              |              |
| 1959:      | 17         | 3         | 14 | 1 | 16 | 3 | 13 | 0 | 1329.9214300 | 1329.9213912 |
| 0.0000388  | -0.0003000 | 0.0000000 |    |   |    |   |    |   |              |              |
| 1960:      | 18         | 3         | 15 | 1 | 17 | 3 | 14 | 0 | 1330.1836300 | 1330.1834720 |
| 0.0001580  | -0.0003000 | 0.0000000 |    |   |    |   |    |   |              |              |
| 1961:      | 19         | 3         | 16 | 1 | 18 | 3 | 15 | 0 | 1330.4459400 | 1330.4458608 |
| 0.0000792  | -0.0003000 | 0.0000000 |    |   |    |   |    |   |              |              |
| 1962:      | 20         | 3         | 17 | 1 | 19 | 3 | 16 | 0 | 1330.7084600 | 1330.7086097 |
| -0.0001497 | -0.0003000 | 0.0000000 |    |   |    |   |    |   |              |              |
| 1963:      | 22         | 3         | 19 | 1 | 21 | 3 | 18 | 0 | 1331.2355400 | 1331.2354012 |
| 0.0001388  | -0.0003000 | 0.0000000 |    |   |    |   |    |   |              |              |
| 1964:      | 23         | 3         | 20 | 1 | 22 | 3 | 19 | 0 | 1331.4995900 | 1331.4995495 |
| 0.0000405  | -0.0003000 | 0.0000000 |    |   |    |   |    |   |              |              |
| 1965:      | 24         | 3         | 21 | 1 | 23 | 3 | 20 | 0 | 1331.7642800 | 1331.7642655 |
| 0.0000145  | -0.0003000 | 0.0000000 |    |   |    |   |    |   |              |              |
| 1966:      | 25         | 3         | 22 | 1 | 24 | 3 | 21 | 0 | 1332.0295800 | 1332.0295917 |
| -0.0000117 | -0.0003000 | 0.0000000 |    |   |    |   |    |   |              |              |
| 1967:      | 26         | 3         | 23 | 1 | 25 | 3 | 22 | 0 | 1332.2956600 | 1332.2955614 |
| 0.0000986  | -0.0003000 | 0.0000000 |    |   |    |   |    |   |              |              |
| 1968:      | 27         | 3         | 24 | 1 | 26 | 3 | 23 | 0 | 1332.5624300 | 1332.5621963 |
| 0.0002337  | -0.0003000 | 0.0000000 |    |   |    |   |    |   |              |              |
| 1969:      | 28         | 3         | 25 | 1 | 27 | 3 | 24 | 0 | 1332.8295100 | 1332.8295025 |
| 0.0000075  | -0.0003000 | 0.0000000 |    |   |    |   |    |   |              |              |
| 1970:      | 29         | 3         | 26 | 1 | 28 | 3 | 25 | 0 | 1333.0975200 | 1333.0974682 |
| 0.0000518  | -0.0003000 | 0.0000000 |    |   |    |   |    |   |              |              |
| 1971:      | 30         | 3         | 27 | 1 | 29 | 3 | 26 | 0 | 1333.3665000 | 1333.3660610 |
| 0.0004390  | -0.0003000 | 0.0000000 |    |   |    |   |    |   |              |              |
| 1972:      | 31         | 3         | 28 | 1 | 30 | 3 | 27 | 0 | 1333.6348500 | 1333.6352263 |
| -0.0003763 | -0.0003000 | 0.0000000 |    |   |    |   |    |   |              |              |
| 1973:      | 32         | 3         | 29 | 1 | 31 | 3 | 28 | 0 | 1333.9049000 | 1333.9048870 |
| 0.0000130  | -0.0003000 | 0.0000000 |    |   |    |   |    |   |              |              |
| 1974:      | 33         | 3         | 30 | 1 | 32 | 3 | 29 | 0 | 1334.1749600 | 1334.1749440 |
| 0.0000160  | -0.0003000 | 0.0000000 |    |   |    |   |    |   |              |              |
| 1975:      | 34         | 3         | 31 | 1 | 33 | 3 | 30 | 0 | 1334.4454000 | 1334.4452786 |
| 0.0001214  | -0.0003000 | 0.0000000 |    |   |    |   |    |   |              |              |
| 1976:      | 35         | 3         | 32 | 1 | 34 | 3 | 31 | 0 | 1334.7159600 | 1334.7157554 |
| 0.0002046  | -0.0003000 | 0.0000000 |    |   |    |   |    |   |              |              |
| 1977:      | 36         | 3         | 33 | 1 | 35 | 3 | 32 | 0 | 1334.9862400 | 1334.9862268 |
| 0.0000132  | -0.0003000 | 0.0000000 |    |   |    |   |    |   |              |              |
| 1978:      | 37         | 3         | 34 | 1 | 36 | 3 | 33 | 0 | 1335.2565700 | 1335.2565377 |
| 0.0000323  | -0.0003000 | 0.0000000 |    |   |    |   |    |   |              |              |
| 1979:      | 38         | 3         | 35 | 1 | 37 | 3 | 34 | 0 | 1335.5264900 | 1335.5265301 |
| -0.0000401 | -0.0003000 | 0.0000000 |    |   |    |   |    |   |              |              |
| 1980:      | 39         | 3         | 36 | 1 | 38 | 3 | 35 | 0 | 1335.7961800 | 1335.7960479 |

|            |            |           |      |                             |
|------------|------------|-----------|------|-----------------------------|
| 0.0001321  | -0.0003000 | 0.0000000 |      |                             |
| 1981: 40   | 3 37       | 1 39      | 3 36 | 0 1336.0650300 1336.0649406 |
| 0.0000894  | -0.0003000 | 0.0000000 |      |                             |
| 1982: 41   | 3 38       | 1 40      | 3 37 | 0 1336.3330600 1336.3330658 |
| -0.0000058 | -0.0003000 | 0.0000000 |      |                             |
| 1983: 42   | 3 39       | 1 41      | 3 38 | 0 1336.5999300 1336.6002914 |
| -0.0003614 | -0.0003000 | 0.0000000 |      |                             |
| 1984: 43   | 3 40       | 1 42      | 3 39 | 0 1336.8667300 1336.8664959 |
| 0.0002341  | -0.0003000 | 0.0000000 |      |                             |
| 1985: 44   | 3 41       | 1 43      | 3 40 | 0 1337.1316200 1337.1315688 |
| 0.0000512  | -0.0003000 | 0.0000000 |      |                             |
| 1986: 45   | 3 42       | 1 44      | 3 41 | 0 1337.3956400 1337.3954097 |
| 0.0002303  | -0.0003000 | 0.0000000 |      |                             |
| 1987: 47   | 3 44       | 1 46      | 3 43 | 0 1337.9190600 1337.9190366 |
| 0.0000234  | -0.0003000 | 0.0000000 |      |                             |
| 1988: 48   | 3 45       | 1 47      | 3 44 | 0 1338.1787000 1338.1786609 |
| 0.0000391  | -0.0003000 | 0.0000000 |      |                             |
| 1989: 49   | 3 46       | 1 48      | 3 45 | 0 1338.4367100 1338.4367272 |
| -0.0000172 | -0.0003000 | 0.0000000 |      |                             |
| 1990: 50   | 3 47       | 1 49      | 3 46 | 0 1338.6931400 1338.6931670 |
| -0.0000270 | -0.0003000 | 0.0000000 |      |                             |
| 1991: 52   | 3 49       | 1 51      | 3 48 | 0 1339.2011000 1339.2009099 |
| 0.0001901  | -0.0003000 | 0.0000000 |      |                             |
| 1992: 53   | 3 50       | 1 52      | 3 49 | 0 1339.4520100 1339.4520936 |
| -0.0000836 | -0.0003000 | 0.0000000 |      |                             |
| 1993: 54   | 3 51       | 1 53      | 3 50 | 0 1339.7014000 1339.7014130 |
| -0.0000130 | -0.0003000 | 0.0000000 |      |                             |
| 1994: 55   | 3 52       | 1 54      | 3 51 | 0 1339.9488200 1339.9488207 |
| -0.0000007 | -0.0003000 | 0.0000000 |      |                             |
| 1995: 56   | 3 53       | 1 55      | 3 52 | 0 1340.1942400 1340.1942767 |
| -0.0000367 | -0.0003000 | 0.0000000 |      |                             |
| 1996: 57   | 3 54       | 1 56      | 3 53 | 0 1340.4373300 1340.4377506 |
| -0.0004206 | -0.0003000 | 0.0000000 |      |                             |
| 1997: 58   | 3 55       | 1 57      | 3 54 | 0 1340.6795900 1340.6792240 |
| 0.0003660  | -0.0003000 | 0.0000000 |      |                             |
| 1998: 60   | 3 57       | 1 59      | 3 56 | 0 1341.1561700 1341.1561670 |
| 0.0000030  | -0.0003000 | 0.0000000 |      |                             |
| 1999: 61   | 3 58       | 1 60      | 3 57 | 0 1341.3916500 1341.3916782 |
| -0.0000282 | -0.0003000 | 0.0000000 |      |                             |
| 2000: 62   | 3 59       | 1 61      | 3 58 | 0 1341.6253600 1341.6252752 |
| 0.0000848  | -0.0003000 | 0.0000000 |      |                             |
| 2001: 63   | 3 60       | 1 62      | 3 59 | 0 1341.8570100 1341.8570275 |
| -0.0000175 | -0.0003000 | 0.0000000 |      |                             |
| 2002: 64   | 3 61       | 1 63      | 3 60 | 0 1342.0861400 1342.0870246 |
| -0.0008846 | -0.0003000 | 0.0000000 |      |                             |
| 2003: 65   | 3 62       | 1 64      | 3 61 | 0 1342.3160400 1342.3153743 |
| 0.0006657  | -0.0003000 | 0.0000000 |      |                             |
| 2004: 66   | 3 63       | 1 65      | 3 62 | 0 1342.5421500 1342.5422011 |
| -0.0000511 | -0.0003000 | 0.0000000 |      |                             |
| 2005: 67   | 3 64       | 1 66      | 3 63 | 0 1342.7675400 1342.7676425 |
| -0.0001025 | -0.0003000 | 0.0000000 |      |                             |
| 2006: 69   | 3 66       | 1 68      | 3 65 | 0 1343.2148700 1343.2149622 |
| -0.0000922 | -0.0003000 | 0.0000000 |      |                             |
| 2007: 70   | 3 67       | 1 69      | 3 66 | 0 1343.4372800 1343.4371448 |
| 0.0001352  | -0.0003000 | 0.0000000 |      |                             |
| 2008: 71   | 3 68       | 1 70      | 3 67 | 0 1343.6584100 1343.6585420 |
| -0.0001320 | -0.0003000 | 0.0000000 |      |                             |
| 2009: 72   | 3 69       | 1 71      | 3 68 | 0 1343.8793700 1343.8792947 |
| 0.0000753  | -0.0003000 | 0.0000000 |      |                             |
| 2010: 73   | 3 70       | 1 72      | 3 69 | 0 1344.0995000 1344.0995329 |
| -0.0000329 | -0.0003000 | 0.0000000 |      |                             |
| 2011: 74   | 3 71       | 1 73      | 3 70 | 0 1344.3192600 1344.3193733 |
| -0.0001133 | -0.0003000 | 0.0000000 |      |                             |
| 2012: 75   | 3 72       | 1 74      | 3 71 | 0 1344.5391500 1344.5389174 |
| 0.0002326  | -0.0003000 | 0.0000000 |      |                             |

|            |            |           |      |   |              |              |
|------------|------------|-----------|------|---|--------------|--------------|
| 2013: 76   | 3 73       | 1 75      | 3 72 | 0 | 1344.7581800 | 1344.7582514 |
| -0.0000714 | -0.0003000 | 0.0000000 |      |   |              |              |
| 2014: 77   | 3 74       | 1 76      | 3 73 | 0 | 1344.9777800 | 1344.9774456 |
| 0.0003344  | -0.0003000 | 0.0000000 |      |   |              |              |
| 2015: 78   | 3 75       | 1 77      | 3 74 | 0 | 1345.1965100 | 1345.1965553 |
| -0.0000453 | -0.0003000 | 0.0000000 |      |   |              |              |
| 2016: 79   | 3 76       | 1 78      | 3 75 | 0 | 1345.4162800 | 1345.4156220 |
| 0.0006580  | -0.0003000 | 0.0000000 |      |   |              |              |
| 2017: 80   | 3 77       | 1 79      | 3 76 | 0 | 1345.6349400 | 1345.6346744 |
| 0.0002656  | -0.0003000 | 0.0000000 |      |   |              |              |
| 2018: 81   | 3 78       | 1 80      | 3 77 | 0 | 1345.8535300 | 1345.8537305 |
| -0.0002005 | -0.0003000 | 0.0000000 |      |   |              |              |
| 2019: 82   | 3 79       | 1 81      | 3 78 | 0 | 1346.0726500 | 1346.0727986 |
| -0.0001486 | -0.0003000 | 0.0000000 |      |   |              |              |
| 2020: 83   | 3 80       | 1 82      | 3 79 | 0 | 1346.2918000 | 1346.2918794 |
| -0.0000794 | -0.0003000 | 0.0000000 |      |   |              |              |
| 2021: 84   | 3 81       | 1 83      | 3 80 | 0 | 1346.5111100 | 1346.5109674 |
| 0.0001426  | -0.0003000 | 0.0000000 |      |   |              |              |
| 2022: 85   | 3 82       | 1 84      | 3 81 | 0 | 1346.7300900 | 1346.7300520 |
| 0.0000380  | -0.0003000 | 0.0000000 |      |   |              |              |
| 2023: 86   | 3 83       | 1 85      | 3 82 | 0 | 1346.9497500 | 1346.9491189 |
| 0.0006311  | -0.0003000 | 0.0000000 |      |   |              |              |
| 2024: 87   | 3 84       | 1 86      | 3 83 | 0 | 1347.1686100 | 1347.1681514 |
| 0.0004586  | -0.0003000 | 0.0000000 |      |   |              |              |
| 2025: 88   | 3 85       | 1 87      | 3 84 | 0 | 1347.3872400 | 1347.3871307 |
| 0.0001093  | -0.0003000 | 0.0000000 |      |   |              |              |
| 2026: 89   | 3 86       | 1 88      | 3 85 | 0 | 1347.6069700 | 1347.6060370 |
| 0.0009330  | -0.0003000 | 0.0000000 |      |   |              |              |
| 2027: 91   | 3 89       | 1 92      | 3 90 | 0 | 1301.2680500 | 1301.2683760 |
| -0.0003260 | -0.0003000 | 0.0000000 |      |   |              |              |
| 2028: 90   | 3 88       | 1 91      | 3 89 | 0 | 1301.5311100 | 1301.5316849 |
| -0.0005749 | -0.0003000 | 0.0000000 |      |   |              |              |
| 2029: 89   | 3 87       | 1 90      | 3 88 | 0 | 1301.7956900 | 1301.7949140 |
| 0.0007760  | -0.0003000 | 0.0000000 |      |   |              |              |
| 2030: 88   | 3 86       | 1 89      | 3 87 | 0 | 1302.0587200 | 1302.0580623 |
| 0.0006577  | -0.0003000 | 0.0000000 |      |   |              |              |
| 2031: 87   | 3 85       | 1 88      | 3 86 | 0 | 1302.3212900 | 1302.3211290 |
| 0.0001610  | -0.0003000 | 0.0000000 |      |   |              |              |
| 2032: 86   | 3 84       | 1 87      | 3 85 | 0 | 1302.5838400 | 1302.5841134 |
| -0.0002734 | -0.0003000 | 0.0000000 |      |   |              |              |
| 2033: 76   | 3 74       | 1 77      | 3 75 | 0 | 1305.2091600 | 1305.2093749 |
| -0.0002149 | -0.0003000 | 0.0000000 |      |   |              |              |
| 2034: 75   | 3 73       | 1 76      | 3 74 | 0 | 1305.4715000 | 1305.4714517 |
| 0.0000483  | -0.0003000 | 0.0000000 |      |   |              |              |
| 2035: 71   | 3 69       | 1 72      | 3 70 | 0 | 1306.5194100 | 1306.5190203 |
| 0.0003897  | -0.0003000 | 0.0000000 |      |   |              |              |
| 2036: 70   | 3 68       | 1 71      | 3 69 | 0 | 1306.7806100 | 1306.7807434 |
| -0.0001334 | -0.0003000 | 0.0000000 |      |   |              |              |
| 2037: 69   | 3 67       | 1 70      | 3 68 | 0 | 1307.0422600 | 1307.0424068 |
| -0.0001468 | -0.0003000 | 0.0000000 |      |   |              |              |
| 2038: 68   | 3 66       | 1 69      | 3 67 | 0 | 1307.3037900 | 1307.3040154 |
| -0.0002254 | -0.0003000 | 0.0000000 |      |   |              |              |
| 2039: 67   | 3 65       | 1 68      | 3 66 | 0 | 1307.5654500 | 1307.5655748 |
| -0.0001248 | -0.0003000 | 0.0000000 |      |   |              |              |
| 2040: 66   | 3 64       | 1 67      | 3 65 | 0 | 1307.8270800 | 1307.8270909 |
| -0.0000109 | -0.0003000 | 0.0000000 |      |   |              |              |
| 2041: 65   | 3 63       | 1 66      | 3 64 | 0 | 1308.0888500 | 1308.0885704 |
| 0.0002796  | -0.0003000 | 0.0000000 |      |   |              |              |
| 2042: 64   | 3 62       | 1 65      | 3 63 | 0 | 1308.3498600 | 1308.3500205 |
| -0.0001605 | -0.0003000 | 0.0000000 |      |   |              |              |
| 2043: 63   | 3 61       | 1 64      | 3 62 | 0 | 1308.6113000 | 1308.6114490 |
| -0.0001490 | -0.0003000 | 0.0000000 |      |   |              |              |
| 2044: 62   | 3 60       | 1 63      | 3 61 | 0 | 1308.8727900 | 1308.8728643 |
| -0.0000743 | -0.0003000 | 0.0000000 |      |   |              |              |
| 2045: 61   | 3 59       | 1 62      | 3 60 | 0 | 1309.1342200 | 1309.1342751 |

|            |            |                  |              |              |
|------------|------------|------------------|--------------|--------------|
| -0.0000551 | -0.0003000 | 0.0000000        |              |              |
| 2046:      | 60         | 3 58 1 61 3 59 0 | 1309.3955600 | 1309.3956910 |
| -0.0001310 | -0.0003000 | 0.0000000        |              |              |
| 2047:      | 59         | 3 57 1 60 3 58 0 | 1309.6575200 | 1309.6571217 |
| 0.0003983  | -0.0003000 | 0.0000000        |              |              |
| 2048:      | 58         | 3 56 1 59 3 57 0 | 1309.9185900 | 1309.9185775 |
| 0.0000125  | -0.0003000 | 0.0000000        |              |              |
| 2049:      | 57         | 3 55 1 58 3 56 0 | 1310.1801300 | 1310.1800689 |
| 0.0000611  | -0.0003000 | 0.0000000        |              |              |
| 2050:      | 56         | 3 54 1 57 3 55 0 | 1310.4415700 | 1310.4416068 |
| -0.0000368 | -0.0003000 | 0.0000000        |              |              |
| 2051:      | 55         | 3 53 1 56 3 54 0 | 1310.7032100 | 1310.7032022 |
| 0.0000078  | -0.0003000 | 0.0000000        |              |              |
| 2052:      | 54         | 3 52 1 55 3 53 0 | 1310.9649900 | 1310.9648660 |
| 0.0001240  | -0.0003000 | 0.0000000        |              |              |
| 2053:      | 53         | 3 51 1 54 3 52 0 | 1311.2268500 | 1311.2266094 |
| 0.0002406  | -0.0003000 | 0.0000000        |              |              |
| 2054:      | 52         | 3 50 1 53 3 51 0 | 1311.4884700 | 1311.4884431 |
| 0.0000269  | -0.0003000 | 0.0000000        |              |              |
| 2055:      | 51         | 3 49 1 52 3 50 0 | 1311.7503700 | 1311.7503780 |
| -0.0000080 | -0.0003000 | 0.0000000        |              |              |
| 2056:      | 50         | 3 48 1 51 3 49 0 | 1312.0124900 | 1312.0124242 |
| 0.0000658  | -0.0003000 | 0.0000000        |              |              |
| 2057:      | 49         | 3 47 1 50 3 48 0 | 1312.2746900 | 1312.2745917 |
| 0.0000983  | -0.0003000 | 0.0000000        |              |              |
| 2058:      | 48         | 3 46 1 49 3 47 0 | 1312.5367500 | 1312.5368898 |
| -0.0001398 | -0.0003000 | 0.0000000        |              |              |
| 2059:      | 47         | 3 45 1 48 3 46 0 | 1312.7995500 | 1312.7993271 |
| 0.0002229  | -0.0003000 | 0.0000000        |              |              |
| 2060:      | 46         | 3 44 1 47 3 45 0 | 1313.0618400 | 1313.0619113 |
| -0.0000713 | -0.0003000 | 0.0000000        |              |              |
| 2061:      | 45         | 3 43 1 46 3 44 0 | 1313.3247800 | 1313.3246497 |
| 0.0001303  | -0.0003000 | 0.0000000        |              |              |
| 2062:      | 44         | 3 42 1 45 3 43 0 | 1313.5877100 | 1313.5875480 |
| 0.0001620  | -0.0003000 | 0.0000000        |              |              |
| 2063:      | 43         | 3 41 1 44 3 42 0 | 1313.8507300 | 1313.8506115 |
| 0.0001185  | -0.0003000 | 0.0000000        |              |              |
| 2064:      | 42         | 3 40 1 43 3 41 0 | 1314.1138800 | 1314.1138440 |
| 0.0000360  | -0.0003000 | 0.0000000        |              |              |
| 2065:      | 41         | 3 39 1 42 3 40 0 | 1314.3772000 | 1314.3772482 |
| -0.0000482 | -0.0003000 | 0.0000000        |              |              |
| 2066:      | 40         | 3 38 1 41 3 39 0 | 1314.6406700 | 1314.6408256 |
| -0.0001556 | -0.0003000 | 0.0000000        |              |              |
| 2067:      | 39         | 3 37 1 40 3 38 0 | 1314.9045400 | 1314.9045764 |
| -0.0000364 | -0.0003000 | 0.0000000        |              |              |
| 2068:      | 38         | 3 36 1 39 3 37 0 | 1315.1685500 | 1315.1684996 |
| 0.0000504  | -0.0003000 | 0.0000000        |              |              |
| 2069:      | 37         | 3 35 1 38 3 36 0 | 1315.4327800 | 1315.4325927 |
| 0.0001873  | -0.0003000 | 0.0000000        |              |              |
| 2070:      | 36         | 3 34 1 37 3 35 0 | 1315.6968400 | 1315.6968519 |
| -0.0000119 | -0.0003000 | 0.0000000        |              |              |
| 2071:      | 35         | 3 33 1 36 3 34 0 | 1315.9613500 | 1315.9612720 |
| 0.0000780  | -0.0003000 | 0.0000000        |              |              |
| 2072:      | 34         | 3 32 1 35 3 33 0 | 1316.2257900 | 1316.2258465 |
| -0.0000565 | -0.0003000 | 0.0000000        |              |              |
| 2073:      | 33         | 3 31 1 34 3 32 0 | 1316.4906100 | 1316.4905672 |
| 0.0000428  | -0.0003000 | 0.0000000        |              |              |
| 2074:      | 32         | 3 30 1 33 3 31 0 | 1316.7555300 | 1316.7554249 |
| 0.0001051  | -0.0003000 | 0.0000000        |              |              |
| 2075:      | 31         | 3 29 1 32 3 30 0 | 1317.0204800 | 1317.0204089 |
| 0.0000711  | -0.0003000 | 0.0000000        |              |              |
| 2076:      | 30         | 3 28 1 31 3 29 0 | 1317.2857300 | 1317.2855071 |
| 0.0002229  | -0.0003000 | 0.0000000        |              |              |
| 2077:      | 29         | 3 27 1 30 3 28 0 | 1317.5508500 | 1317.5507064 |
| 0.0001436  | -0.0003000 | 0.0000000        |              |              |

|            |            |           |    |   |    |   |    |   |              |              |
|------------|------------|-----------|----|---|----|---|----|---|--------------|--------------|
| 2078:      | 28         | 3         | 26 | 1 | 29 | 3 | 27 | 0 | 1317.8160400 | 1317.8159924 |
| 0.0000476  | -0.0003000 | 0.0000000 |    |   |    |   |    |   |              |              |
| 2079:      | 27         | 3         | 25 | 1 | 28 | 3 | 26 | 0 | 1318.0813700 | 1318.0813495 |
| 0.0000205  | -0.0003000 | 0.0000000 |    |   |    |   |    |   |              |              |
| 2080:      | 26         | 3         | 24 | 1 | 27 | 3 | 25 | 0 | 1318.3467200 | 1318.3467615 |
| -0.0000415 | -0.0003000 | 0.0000000 |    |   |    |   |    |   |              |              |
| 2081:      | 25         | 3         | 23 | 1 | 26 | 3 | 24 | 0 | 1318.6121600 | 1318.6122111 |
| -0.0000511 | -0.0003000 | 0.0000000 |    |   |    |   |    |   |              |              |
| 2082:      | 24         | 3         | 22 | 1 | 25 | 3 | 23 | 0 | 1318.8776900 | 1318.8776804 |
| 0.0000096  | -0.0003000 | 0.0000000 |    |   |    |   |    |   |              |              |
| 2083:      | 23         | 3         | 21 | 1 | 24 | 3 | 22 | 0 | 1319.1432900 | 1319.1431511 |
| 0.0001389  | -0.0003000 | 0.0000000 |    |   |    |   |    |   |              |              |
| 2084:      | 22         | 3         | 20 | 1 | 23 | 3 | 21 | 0 | 1319.4087700 | 1319.4086045 |
| 0.0001655  | -0.0003000 | 0.0000000 |    |   |    |   |    |   |              |              |
| 2085:      | 21         | 3         | 19 | 1 | 22 | 3 | 20 | 0 | 1319.6738200 | 1319.6740220 |
| -0.0002020 | -0.0003000 | 0.0000000 |    |   |    |   |    |   |              |              |
| 2086:      | 20         | 3         | 18 | 1 | 21 | 3 | 19 | 0 | 1319.9392500 | 1319.9393850 |
| -0.0001350 | -0.0003000 | 0.0000000 |    |   |    |   |    |   |              |              |
| 2087:      | 19         | 3         | 17 | 1 | 20 | 3 | 18 | 0 | 1320.2046800 | 1320.2046752 |
| 0.0000048  | -0.0003000 | 0.0000000 |    |   |    |   |    |   |              |              |
| 2088:      | 18         | 3         | 16 | 1 | 19 | 3 | 17 | 0 | 1320.4697600 | 1320.4698750 |
| -0.0001150 | -0.0003000 | 0.0000000 |    |   |    |   |    |   |              |              |
| 2089:      | 17         | 3         | 15 | 1 | 18 | 3 | 16 | 0 | 1320.7356800 | 1320.7349677 |
| 0.0007123  | -0.0003000 | 0.0000000 |    |   |    |   |    |   |              |              |
| 2090:      | 16         | 3         | 14 | 1 | 17 | 3 | 15 | 0 | 1320.9998100 | 1320.9999373 |
| -0.0001273 | -0.0003000 | 0.0000000 |    |   |    |   |    |   |              |              |
| 2091:      | 15         | 3         | 13 | 1 | 16 | 3 | 14 | 0 | 1321.2646900 | 1321.2647693 |
| -0.0000793 | -0.0003000 | 0.0000000 |    |   |    |   |    |   |              |              |
| 2092:      | 11         | 3         | 9  | 1 | 12 | 3 | 10 | 0 | 1322.3221100 | 1322.3224813 |
| -0.0003713 | -0.0003000 | 0.0000000 |    |   |    |   |    |   |              |              |
| 2093:      | 10         | 3         | 8  | 1 | 11 | 3 | 9  | 0 | 1322.5861500 | 1322.5864599 |
| -0.0003099 | -0.0003000 | 0.0000000 |    |   |    |   |    |   |              |              |
| 2094:      | 9          | 3         | 7  | 1 | 10 | 3 | 8  | 0 | 1322.8499800 | 1322.8502468 |
| -0.0002668 | -0.0003000 | 0.0000000 |    |   |    |   |    |   |              |              |
| 2095:      | 8          | 3         | 6  | 1 | 9  | 3 | 7  | 0 | 1323.1138100 | 1323.1138393 |
| -0.0000293 | -0.0003000 | 0.0000000 |    |   |    |   |    |   |              |              |
| 2096:      | 7          | 3         | 5  | 1 | 8  | 3 | 6  | 0 | 1323.3771600 | 1323.3772365 |
| -0.0000765 | -0.0003000 | 0.0000000 |    |   |    |   |    |   |              |              |
| 2097:      | 6          | 3         | 4  | 1 | 7  | 3 | 5  | 0 | 1323.6405000 | 1323.6404390 |
| 0.0000610  | -0.0003000 | 0.0000000 |    |   |    |   |    |   |              |              |
| 2098:      | 5          | 3         | 3  | 1 | 6  | 3 | 4  | 0 | 1323.9033700 | 1323.9034495 |
| -0.0000795 | -0.0003000 | 0.0000000 |    |   |    |   |    |   |              |              |
| 2099:      | 4          | 3         | 2  | 1 | 5  | 3 | 3  | 0 | 1324.1663900 | 1324.1662717 |
| 0.0001183  | -0.0003000 | 0.0000000 |    |   |    |   |    |   |              |              |
| 2100:      | 3          | 3         | 1  | 1 | 4  | 3 | 2  | 0 | 1324.4287300 | 1324.4289110 |
| -0.0001810 | -0.0003000 | 0.0000000 |    |   |    |   |    |   |              |              |
| 2101:      | 4          | 3         | 2  | 1 | 3  | 3 | 1  | 0 | 1326.5244700 | 1326.5244002 |
| 0.0000698  | -0.0003000 | 0.0000000 |    |   |    |   |    |   |              |              |
| 2102:      | 5          | 3         | 3  | 1 | 4  | 3 | 2  | 0 | 1326.7857700 | 1326.7857727 |
| -0.0000027 | -0.0003000 | 0.0000000 |    |   |    |   |    |   |              |              |
| 2103:      | 6          | 3         | 4  | 1 | 5  | 3 | 3  | 0 | 1327.0470900 | 1327.0470505 |
| 0.0000395  | -0.0003000 | 0.0000000 |    |   |    |   |    |   |              |              |
| 2104:      | 7          | 3         | 5  | 1 | 6  | 3 | 4  | 0 | 1327.3083800 | 1327.3082410 |
| 0.0001390  | -0.0003000 | 0.0000000 |    |   |    |   |    |   |              |              |
| 2105:      | 8          | 3         | 6  | 1 | 7  | 3 | 5  | 0 | 1327.5695100 | 1327.5693506 |
| 0.0001594  | -0.0003000 | 0.0000000 |    |   |    |   |    |   |              |              |
| 2106:      | 9          | 3         | 7  | 1 | 8  | 3 | 6  | 0 | 1327.8307100 | 1327.8303840 |
| 0.0003260  | -0.0003000 | 0.0000000 |    |   |    |   |    |   |              |              |
| 2107:      | 10         | 3         | 8  | 1 | 9  | 3 | 7  | 0 | 1328.0915700 | 1328.0913445 |
| 0.0002255  | -0.0003000 | 0.0000000 |    |   |    |   |    |   |              |              |
| 2108:      | 11         | 3         | 9  | 1 | 10 | 3 | 8  | 0 | 1328.3524500 | 1328.3522335 |
| 0.0002165  | -0.0003000 | 0.0000000 |    |   |    |   |    |   |              |              |
| 2109:      | 12         | 3         | 10 | 1 | 11 | 3 | 9  | 0 | 1328.6137400 | 1328.6130503 |
| 0.0006897  | -0.0003000 | 0.0000000 |    |   |    |   |    |   |              |              |
| 2110:      | 16         | 3         | 14 | 1 | 15 | 3 | 13 | 0 | 1329.6555900 | 1329.6555027 |

|            |            |           |      |                             |
|------------|------------|-----------|------|-----------------------------|
| 0.0000873  | -0.0003000 | 0.0000000 |      |                             |
| 2111: 17   | 3 15       | 1 16      | 3 14 | 0 1329.9159700 1329.9158679 |
| 0.0001021  | -0.0003000 | 0.0000000 |      |                             |
| 2112: 18   | 3 16       | 1 17      | 3 15 | 0 1330.1759000 1330.1761075 |
| -0.0002075 | -0.0003000 | 0.0000000 |      |                             |
| 2113: 19   | 3 17       | 1 18      | 3 16 | 0 1330.4362700 1330.4362040 |
| 0.0000660  | -0.0003000 | 0.0000000 |      |                             |
| 2114: 20   | 3 18       | 1 19      | 3 17 | 0 1330.6961500 1330.6961378 |
| 0.0000122  | -0.0003000 | 0.0000000 |      |                             |
| 2115: 21   | 3 19       | 1 20      | 3 18 | 0 1330.9560300 1330.9558870 |
| 0.0001430  | -0.0003000 | 0.0000000 |      |                             |
| 2116: 22   | 3 20       | 1 21      | 3 19 | 0 1331.2155300 1331.2154277 |
| 0.0001023  | -0.0003000 | 0.0000000 |      |                             |
| 2117: 23   | 3 21       | 1 22      | 3 20 | 0 1331.4752900 1331.4747344 |
| 0.0005556  | -0.0003000 | 0.0000000 |      |                             |
| 2118: 25   | 3 23       | 1 24      | 3 22 | 0 1331.9923100 1331.9925361 |
| -0.0002261 | -0.0003000 | 0.0000000 |      |                             |
| 2119: 26   | 3 24       | 1 25      | 3 23 | 0 1332.2509900 1332.2509735 |
| 0.0000165  | -0.0003000 | 0.0000000 |      |                             |
| 2120: 27   | 3 25       | 1 26      | 3 24 | 0 1332.5089500 1332.5090620 |
| -0.0001120 | -0.0003000 | 0.0000000 |      |                             |
| 2121: 28   | 3 26       | 1 27      | 3 25 | 0 1332.7666900 1332.7667714 |
| -0.0000814 | -0.0003000 | 0.0000000 |      |                             |
| 2122: 29   | 3 27       | 1 28      | 3 26 | 0 1333.0240200 1333.0240708 |
| -0.0000508 | -0.0003000 | 0.0000000 |      |                             |
| 2123: 30   | 3 28       | 1 29      | 3 27 | 0 1333.2812400 1333.2809299 |
| 0.0003101  | -0.0003000 | 0.0000000 |      |                             |
| 2124: 31   | 3 29       | 1 30      | 3 28 | 0 1333.5372100 1333.5373182 |
| -0.0001082 | -0.0003000 | 0.0000000 |      |                             |
| 2125: 32   | 3 30       | 1 31      | 3 29 | 0 1333.7931700 1333.7932063 |
| -0.0000363 | -0.0003000 | 0.0000000 |      |                             |
| 2126: 33   | 3 31       | 1 32      | 3 30 | 0 1334.0487000 1334.0485650 |
| 0.0001350  | -0.0003000 | 0.0000000 |      |                             |
| 2127: 34   | 3 32       | 1 33      | 3 31 | 0 1334.3033100 1334.3033666 |
| -0.0000566 | -0.0003000 | 0.0000000 |      |                             |
| 2128: 35   | 3 33       | 1 34      | 3 32 | 0 1334.5576500 1334.5575841 |
| 0.0000659  | -0.0003000 | 0.0000000 |      |                             |
| 2129: 36   | 3 34       | 1 35      | 3 33 | 0 1334.8110600 1334.8111919 |
| -0.0001319 | -0.0003000 | 0.0000000 |      |                             |
| 2130: 37   | 3 35       | 1 36      | 3 34 | 0 1335.0632400 1335.0641662 |
| -0.0009262 | -0.0003000 | 0.0000000 |      |                             |
| 2131: 44   | 3 42       | 1 43      | 3 41 | 0 1336.8155600 1336.8155795 |
| -0.0000195 | -0.0003000 | 0.0000000 |      |                             |
| 2132: 45   | 3 43       | 1 44      | 3 42 | 0 1337.0628400 1337.0628294 |
| 0.0000106  | -0.0003000 | 0.0000000 |      |                             |
| 2133: 46   | 3 44       | 1 45      | 3 43 | 0 1337.3090600 1337.3093121 |
| -0.0002521 | -0.0003000 | 0.0000000 |      |                             |
| 2134: 47   | 3 45       | 1 46      | 3 44 | 0 1337.5550000 1337.5550231 |
| -0.0000231 | -0.0003000 | 0.0000000 |      |                             |
| 2135: 48   | 3 46       | 1 47      | 3 45 | 0 1337.8000400 1337.7999604 |
| 0.0000796  | -0.0003000 | 0.0000000 |      |                             |
| 2136: 49   | 3 47       | 1 48      | 3 46 | 0 1338.0440000 1338.0441241 |
| -0.0001241 | -0.0003000 | 0.0000000 |      |                             |
| 2137: 50   | 3 48       | 1 49      | 3 47 | 0 1338.2874400 1338.2875164 |
| -0.0000764 | -0.0003000 | 0.0000000 |      |                             |
| 2138: 51   | 3 49       | 1 50      | 3 48 | 0 1338.5301600 1338.5301414 |
| 0.0000186  | -0.0003000 | 0.0000000 |      |                             |
| 2139: 52   | 3 50       | 1 51      | 3 49 | 0 1338.7718700 1338.7720055 |
| -0.0001355 | -0.0003000 | 0.0000000 |      |                             |
| 2140: 53   | 3 51       | 1 52      | 3 50 | 0 1339.0131600 1339.0131165 |
| 0.0000435  | -0.0003000 | 0.0000000 |      |                             |
| 2141: 54   | 3 52       | 1 53      | 3 51 | 0 1339.2535300 1339.2534843 |
| 0.0000457  | -0.0003000 | 0.0000000 |      |                             |
| 2142: 55   | 3 53       | 1 54      | 3 52 | 0 1339.4932800 1339.4931202 |
| 0.0001598  | -0.0003000 | 0.0000000 |      |                             |

|                                 |              |              |
|---------------------------------|--------------|--------------|
| 2143: 56 3 54 1 55 3 53 0       | 1339.7320700 | 1339.7320369 |
| 0.0000331 -0.0003000 0.0000000  |              |              |
| 2144: 57 3 55 1 56 3 54 0       | 1339.9699300 | 1339.9702483 |
| -0.0003183 -0.0003000 0.0000000 |              |              |
| 2145: 58 3 56 1 57 3 55 0       | 1340.2078100 | 1340.2077694 |
| 0.0000406 -0.0003000 0.0000000  |              |              |
| 2146: 63 3 61 1 62 3 60 0       | 1341.3856500 | 1341.3855922 |
| 0.0000578 -0.0003000 0.0000000  |              |              |
| 2147: 64 3 62 1 63 3 61 0       | 1341.6195400 | 1341.6193195 |
| 0.0002205 -0.0003000 0.0000000  |              |              |
| 2148: 65 3 63 1 64 3 62 0       | 1341.8524300 | 1341.8524744 |
| -0.0000444 -0.0003000 0.0000000 |              |              |
| 2149: 68 3 66 1 67 3 65 0       | 1342.5486700 | 1342.5486680 |
| 0.0000020 -0.0003000 0.0000000  |              |              |
| 2150: 69 3 67 1 68 3 66 0       | 1342.7797000 | 1342.7796939 |
| 0.0000061 -0.0003000 0.0000000  |              |              |
| 2151: 70 3 68 1 69 3 67 0       | 1343.0102300 | 1343.0102246 |
| 0.0000054 -0.0003000 0.0000000  |              |              |
| 2152: 71 3 69 1 70 3 68 0       | 1343.2401700 | 1343.2402735 |
| -0.0001035 -0.0003000 0.0000000 |              |              |
| 2153: 72 3 70 1 71 3 69 0       | 1343.4699300 | 1343.4698531 |
| 0.0000769 -0.0003000 0.0000000  |              |              |
| 2154: 73 3 71 1 72 3 70 0       | 1343.6989300 | 1343.6989749 |
| -0.0000449 -0.0003000 0.0000000 |              |              |
| 2155: 74 3 72 1 73 3 71 0       | 1343.9282400 | 1343.9276498 |
| 0.0005902 -0.0003000 0.0000000  |              |              |
| 2156: 75 3 73 1 74 3 72 0       | 1344.1555700 | 1344.1558876 |
| -0.0003176 -0.0003000 0.0000000 |              |              |
| 2157: 76 3 74 1 75 3 73 0       | 1344.3836100 | 1344.3836973 |
| -0.0000873 -0.0003000 0.0000000 |              |              |
| 2158: 77 3 75 1 76 3 74 0       | 1344.6112000 | 1344.6110873 |
| 0.0001127 -0.0003000 0.0000000  |              |              |
| 2159: 78 3 76 1 77 3 75 0       | 1344.8379100 | 1344.8380648 |
| -0.0001548 -0.0003000 0.0000000 |              |              |
| 2160: 79 3 77 1 78 3 76 0       | 1345.0645800 | 1345.0646365 |
| -0.0000565 -0.0003000 0.0000000 |              |              |
| 2161: 80 3 78 1 79 3 77 0       | 1345.2908300 | 1345.2908083 |
| 0.0000217 -0.0003000 0.0000000  |              |              |
| 2162: 81 3 79 1 80 3 78 0       | 1345.5163800 | 1345.5165854 |
| -0.0002054 -0.0003000 0.0000000 |              |              |
| 2163: 82 3 80 1 81 3 79 0       | 1345.7418400 | 1345.7419722 |
| -0.0001322 -0.0003000 0.0000000 |              |              |
| 2164: 83 3 81 1 82 3 80 0       | 1345.9669000 | 1345.9669728 |
| -0.0000728 -0.0003000 0.0000000 |              |              |
| 2165: 84 3 82 1 83 3 81 0       | 1346.1916000 | 1346.1915905 |
| 0.0000095 -0.0003000 0.0000000  |              |              |
| 2166: 85 3 83 1 84 3 82 0       | 1346.4157900 | 1346.4158280 |
| -0.0000380 -0.0003000 0.0000000 |              |              |
| 2167: 87 3 85 1 86 3 84 0       | 1346.8623400 | 1346.8631719 |
| -0.0008319 -0.0003000 0.0000000 |              |              |
| 2168: 94 3 92 1 93 3 91 0       | 1348.4174800 | 1348.4171222 |
| 0.0003578 -0.0003000 0.0000000  |              |              |
| 2169: 95 3 93 1 94 3 92 0       | 1348.6380700 | 1348.6376274 |
| 0.0004426 -0.0003000 0.0000000  |              |              |
| 2170: 96 3 94 1 95 3 93 0       | 1348.8584200 | 1348.8577599 |
| 0.0006601 -0.0003000 0.0000000  |              |              |
| 2171: 97 3 95 1 96 3 94 0       | 1349.0778600 | 1349.0775189 |
| 0.0003411 -0.0003000 0.0000000  |              |              |
| 2172: 98 3 96 1 97 3 95 0       | 1349.2971100 | 1349.2969035 |
| 0.0002065 -0.0003000 0.0000000  |              |              |
| 2173: 86 4 82 1 87 4 83 0       | 1302.1012600 | 1302.1020097 |
| -0.0007497 -0.0003000 0.0000000 |              |              |
| 2174: 85 4 81 1 86 4 82 0       | 1302.3632800 | 1302.3632076 |
| 0.0000724 -0.0003000 0.0000000  |              |              |
| 2175: 83 4 79 1 84 4 80 0       | 1302.8857100 | 1302.8856343 |

|            |            |                  |              |              |
|------------|------------|------------------|--------------|--------------|
| 0.0000757  | -0.0003000 | 0.0000000        |              |              |
| 2176:      | 82         | 4 78 1 83 4 79 0 | 1303.1468200 | 1303.1469526 |
| -0.0001326 | -0.0003000 | 0.0000000        |              |              |
| 2177:      | 81         | 4 77 1 82 4 78 0 | 1303.4090600 | 1303.4084052 |
| 0.0006548  | -0.0003000 | 0.0000000        |              |              |
| 2178:      | 71         | 4 67 1 72 4 68 0 | 1306.0407700 | 1306.0407615 |
| 0.0000085  | -0.0003000 | 0.0000000        |              |              |
| 2179:      | 70         | 4 66 1 71 4 67 0 | 1306.3068000 | 1306.3066264 |
| 0.0001736  | -0.0003000 | 0.0000000        |              |              |
| 2180:      | 68         | 4 64 1 69 4 65 0 | 1306.8401700 | 1306.8401119 |
| 0.0000581  | -0.0003000 | 0.0000000        |              |              |
| 2181:      | 67         | 4 63 1 68 4 64 0 | 1307.1075800 | 1307.1077552 |
| -0.0001752 | -0.0003000 | 0.0000000        |              |              |
| 2182:      | 66         | 4 62 1 67 4 63 0 | 1307.3763300 | 1307.3760089 |
| 0.0003211  | -0.0003000 | 0.0000000        |              |              |
| 2183:      | 65         | 4 61 1 66 4 62 0 | 1307.6454200 | 1307.6448767 |
| 0.0005433  | -0.0003000 | 0.0000000        |              |              |
| 2184:      | 64         | 4 60 1 65 4 61 0 | 1307.9144700 | 1307.9143598 |
| 0.0001102  | -0.0003000 | 0.0000000        |              |              |
| 2185:      | 63         | 4 59 1 64 4 60 0 | 1308.1845900 | 1308.1844562 |
| 0.0001338  | -0.0003000 | 0.0000000        |              |              |
| 2186:      | 62         | 4 58 1 63 4 59 0 | 1308.4555200 | 1308.4551609 |
| 0.0003591  | -0.0003000 | 0.0000000        |              |              |
| 2187:      | 61         | 4 57 1 62 4 58 0 | 1308.7263200 | 1308.7264652 |
| -0.0001452 | -0.0003000 | 0.0000000        |              |              |
| 2188:      | 60         | 4 56 1 61 4 57 0 | 1308.9987100 | 1308.9983565 |
| 0.0003535  | -0.0003000 | 0.0000000        |              |              |
| 2189:      | 59         | 4 55 1 60 4 56 0 | 1309.2709800 | 1309.2708171 |
| 0.0001629  | -0.0003000 | 0.0000000        |              |              |
| 2190:      | 58         | 4 54 1 59 4 55 0 | 1309.5442500 | 1309.5438241 |
| 0.0004259  | -0.0003000 | 0.0000000        |              |              |
| 2191:      | 57         | 4 53 1 58 4 54 0 | 1309.8174700 | 1309.8173480 |
| 0.0001220  | -0.0003000 | 0.0000000        |              |              |
| 2192:      | 56         | 4 52 1 57 4 53 0 | 1310.0918100 | 1310.0913527 |
| 0.0004573  | -0.0003000 | 0.0000000        |              |              |
| 2193:      | 55         | 4 51 1 56 4 52 0 | 1310.3660000 | 1310.3657944 |
| 0.0002056  | -0.0003000 | 0.0000000        |              |              |
| 2194:      | 54         | 4 50 1 55 4 51 0 | 1310.6408000 | 1310.6406218 |
| 0.0001782  | -0.0003000 | 0.0000000        |              |              |
| 2195:      | 53         | 4 49 1 54 4 50 0 | 1310.9155800 | 1310.9157760 |
| -0.0001960 | -0.0003000 | 0.0000000        |              |              |
| 2196:      | 52         | 4 48 1 53 4 49 0 | 1311.1908800 | 1311.1911913 |
| -0.0003113 | -0.0003000 | 0.0000000        |              |              |
| 2197:      | 51         | 4 47 1 52 4 48 0 | 1311.4667400 | 1311.4667958 |
| -0.0000558 | -0.0003000 | 0.0000000        |              |              |
| 2198:      | 50         | 4 46 1 51 4 47 0 | 1311.7425900 | 1311.7425133 |
| 0.0000767  | -0.0003000 | 0.0000000        |              |              |
| 2199:      | 49         | 4 45 1 50 4 46 0 | 1312.0183700 | 1312.0182652 |
| 0.0001048  | -0.0003000 | 0.0000000        |              |              |
| 2200:      | 48         | 4 44 1 49 4 45 0 | 1312.2942400 | 1312.2939723 |
| 0.0002677  | -0.0003000 | 0.0000000        |              |              |
| 2201:      | 47         | 4 43 1 48 4 44 0 | 1312.5692100 | 1312.5695576 |
| -0.0003476 | -0.0003000 | 0.0000000        |              |              |
| 2202:      | 46         | 4 42 1 47 4 43 0 | 1312.8449200 | 1312.8449481 |
| -0.0000281 | -0.0003000 | 0.0000000        |              |              |
| 2203:      | 45         | 4 41 1 46 4 42 0 | 1313.1201300 | 1313.1200772 |
| 0.0000528  | -0.0003000 | 0.0000000        |              |              |
| 2204:      | 44         | 4 40 1 45 4 41 0 | 1313.3952200 | 1313.3948858 |
| 0.0003342  | -0.0003000 | 0.0000000        |              |              |
| 2205:      | 43         | 4 39 1 44 4 40 0 | 1313.6693000 | 1313.6693242 |
| -0.0000242 | -0.0003000 | 0.0000000        |              |              |
| 2206:      | 42         | 4 38 1 43 4 39 0 | 1313.9433600 | 1313.9433520 |
| 0.0000080  | -0.0003000 | 0.0000000        |              |              |
| 2207:      | 41         | 4 37 1 42 4 38 0 | 1314.2169500 | 1314.2169387 |
| 0.0000113  | -0.0003000 | 0.0000000        |              |              |

|       |            |            |           |   |    |   |    |   |              |              |
|-------|------------|------------|-----------|---|----|---|----|---|--------------|--------------|
| 2208: | 40         | 4          | 36        | 1 | 41 | 4 | 37 | 0 | 1314.4901500 | 1314.4900630 |
|       | 0.0000870  | -0.0003000 | 0.0000000 |   |    |   |    |   |              |              |
| 2209: | 39         | 4          | 35        | 1 | 40 | 4 | 36 | 0 | 1314.7625500 | 1314.7627125 |
|       | -0.0001625 | -0.0003000 | 0.0000000 |   |    |   |    |   |              |              |
| 2210: | 38         | 4          | 34        | 1 | 39 | 4 | 35 | 0 | 1315.0349300 | 1315.0348823 |
|       | 0.0000477  | -0.0003000 | 0.0000000 |   |    |   |    |   |              |              |
| 2211: | 37         | 4          | 33        | 1 | 38 | 4 | 34 | 0 | 1315.3065300 | 1315.3065742 |
|       | -0.0000442 | -0.0003000 | 0.0000000 |   |    |   |    |   |              |              |
| 2212: | 36         | 4          | 32        | 1 | 37 | 4 | 33 | 0 | 1315.5779400 | 1315.5777954 |
|       | 0.0001446  | -0.0003000 | 0.0000000 |   |    |   |    |   |              |              |
| 2213: | 35         | 4          | 31        | 1 | 36 | 4 | 32 | 0 | 1315.8484000 | 1315.8485573 |
|       | -0.0001573 | -0.0003000 | 0.0000000 |   |    |   |    |   |              |              |
| 2214: | 33         | 4          | 29        | 1 | 34 | 4 | 30 | 0 | 1316.3886900 | 1316.3887636 |
|       | -0.0000736 | -0.0003000 | 0.0000000 |   |    |   |    |   |              |              |
| 2215: | 32         | 4          | 28        | 1 | 33 | 4 | 29 | 0 | 1316.6582200 | 1316.6582429 |
|       | -0.0000229 | -0.0003000 | 0.0000000 |   |    |   |    |   |              |              |
| 2216: | 31         | 4          | 27        | 1 | 32 | 4 | 28 | 0 | 1316.9272400 | 1316.9273310 |
|       | -0.0000910 | -0.0003000 | 0.0000000 |   |    |   |    |   |              |              |
| 2217: | 30         | 4          | 26        | 1 | 31 | 4 | 27 | 0 | 1317.1961100 | 1317.1960467 |
|       | 0.0000633  | -0.0003000 | 0.0000000 |   |    |   |    |   |              |              |
| 2218: | 29         | 4          | 25        | 1 | 30 | 4 | 26 | 0 | 1317.4644600 | 1317.4644084 |
|       | 0.0000516  | -0.0003000 | 0.0000000 |   |    |   |    |   |              |              |
| 2219: | 28         | 4          | 24        | 1 | 29 | 4 | 25 | 0 | 1317.7323800 | 1317.7324337 |
|       | -0.0000537 | -0.0003000 | 0.0000000 |   |    |   |    |   |              |              |
| 2220: | 27         | 4          | 23        | 1 | 28 | 4 | 24 | 0 | 1318.0001100 | 1318.0001393 |
|       | -0.0000293 | -0.0003000 | 0.0000000 |   |    |   |    |   |              |              |
| 2221: | 22         | 4          | 18        | 1 | 23 | 4 | 19 | 0 | 1319.3348800 | 1319.3343776 |
|       | 0.0005024  | -0.0003000 | 0.0000000 |   |    |   |    |   |              |              |
| 2222: | 21         | 4          | 17        | 1 | 22 | 4 | 18 | 0 | 1319.6007800 | 1319.6004513 |
|       | 0.0003287  | -0.0003000 | 0.0000000 |   |    |   |    |   |              |              |
| 2223: | 20         | 4          | 16        | 1 | 21 | 4 | 17 | 0 | 1319.8665200 | 1319.8662899 |
|       | 0.0002301  | -0.0003000 | 0.0000000 |   |    |   |    |   |              |              |
| 2224: | 19         | 4          | 15        | 1 | 20 | 4 | 16 | 0 | 1320.1320100 | 1320.1319010 |
|       | 0.0001090  | -0.0003000 | 0.0000000 |   |    |   |    |   |              |              |
| 2225: | 18         | 4          | 14        | 1 | 19 | 4 | 15 | 0 | 1320.3973600 | 1320.3972915 |
|       | 0.0000685  | -0.0003000 | 0.0000000 |   |    |   |    |   |              |              |
| 2226: | 17         | 4          | 13        | 1 | 18 | 4 | 14 | 0 | 1320.6624300 | 1320.6624676 |
|       | -0.0000376 | -0.0003000 | 0.0000000 |   |    |   |    |   |              |              |
| 2227: | 16         | 4          | 12        | 1 | 17 | 4 | 13 | 0 | 1320.9274100 | 1320.9274347 |
|       | -0.0000247 | -0.0003000 | 0.0000000 |   |    |   |    |   |              |              |
| 2228: | 15         | 4          | 11        | 1 | 16 | 4 | 12 | 0 | 1321.1922700 | 1321.1921979 |
|       | 0.0000721  | -0.0003000 | 0.0000000 |   |    |   |    |   |              |              |
| 2229: | 14         | 4          | 10        | 1 | 15 | 4 | 11 | 0 | 1321.4567000 | 1321.4567617 |
|       | -0.0000617 | -0.0003000 | 0.0000000 |   |    |   |    |   |              |              |
| 2230: | 13         | 4          | 9         | 1 | 14 | 4 | 10 | 0 | 1321.7210700 | 1321.7211300 |
|       | -0.0000600 | -0.0003000 | 0.0000000 |   |    |   |    |   |              |              |
| 2231: | 12         | 4          | 8         | 1 | 13 | 4 | 9  | 0 | 1321.9852000 | 1321.9853068 |
|       | -0.0001068 | -0.0003000 | 0.0000000 |   |    |   |    |   |              |              |
| 2232: | 11         | 4          | 7         | 1 | 12 | 4 | 8  | 0 | 1322.2492600 | 1322.2492957 |
|       | -0.0000357 | -0.0003000 | 0.0000000 |   |    |   |    |   |              |              |
| 2233: | 10         | 4          | 6         | 1 | 11 | 4 | 7  | 0 | 1322.5131500 | 1322.5131001 |
|       | 0.0000499  | -0.0003000 | 0.0000000 |   |    |   |    |   |              |              |
| 2234: | 9          | 4          | 5         | 1 | 10 | 4 | 6  | 0 | 1322.7767900 | 1322.7767233 |
|       | 0.0000667  | -0.0003000 | 0.0000000 |   |    |   |    |   |              |              |
| 2235: | 8          | 4          | 4         | 1 | 9  | 4 | 5  | 0 | 1323.0401800 | 1323.0401686 |
|       | 0.0000114  | -0.0003000 | 0.0000000 |   |    |   |    |   |              |              |
| 2236: | 7          | 4          | 3         | 1 | 8  | 4 | 4  | 0 | 1323.3034100 | 1323.3034394 |
|       | -0.0000294 | -0.0003000 | 0.0000000 |   |    |   |    |   |              |              |
| 2237: | 6          | 4          | 2         | 1 | 7  | 4 | 3  | 0 | 1323.5666600 | 1323.5665389 |
|       | 0.0001211  | -0.0003000 | 0.0000000 |   |    |   |    |   |              |              |
| 2238: | 5          | 4          | 1         | 1 | 6  | 4 | 2  | 0 | 1323.8294100 | 1323.8294705 |
|       | -0.0000605 | -0.0003000 | 0.0000000 |   |    |   |    |   |              |              |
| 2239: | 4          | 4          | 0         | 1 | 5  | 4 | 1  | 0 | 1324.0920900 | 1324.0922377 |
|       | -0.0001477 | -0.0003000 | 0.0000000 |   |    |   |    |   |              |              |
| 2240: | 5          | 4          | 1         | 1 | 4  | 4 | 0  | 0 | 1326.7116500 | 1326.7117031 |

|            |            |           |              |              |
|------------|------------|-----------|--------------|--------------|
| -0.0000531 | -0.0003000 | 0.0000000 |              |              |
| 2241:      | 6          | 4         | 2            | 1 5 4 1 0    |
| 0.0001286  | -0.0003000 | 0.0000000 | 1326.9730500 | 1326.9729214 |
| 2242:      | 7          | 4         | 3            | 1 6 4 2 0    |
| 0.0000043  | -0.0003000 | 0.0000000 | 1327.2340300 | 1327.2340257 |
| 2243:      | 8          | 4         | 4            | 1 7 4 3 0    |
| 0.0000290  | -0.0003000 | 0.0000000 | 1327.4950500 | 1327.4950210 |
| 2244:      | 9          | 4         | 5            | 1 8 4 4 0    |
| -0.0001325 | -0.0003000 | 0.0000000 | 1327.7557800 | 1327.7559125 |
| 2245:      | 10         | 4         | 6            | 1 9 4 5 0    |
| -0.0001956 | -0.0003000 | 0.0000000 | 1328.0165100 | 1328.0167056 |
| 2246:      | 11         | 4         | 7            | 1 10 4 6 0   |
| 0.0001241  | -0.0003000 | 0.0000000 | 1328.2775300 | 1328.2774059 |
| 2247:      | 12         | 4         | 8            | 1 11 4 7 0   |
| 0.0000008  | -0.0003000 | 0.0000000 | 1328.5380200 | 1328.5380192 |
| 2248:      | 13         | 4         | 9            | 1 12 4 8 0   |
| -0.0002419 | -0.0003000 | 0.0000000 | 1328.7983100 | 1328.7985519 |
| 2249:      | 14         | 4         | 10           | 1 13 4 9 0   |
| -0.0000007 | -0.0003000 | 0.0000000 | 1329.0590100 | 1329.0590107 |
| 2250:      | 15         | 4         | 11           | 1 14 4 10 0  |
| -0.0000726 | -0.0003000 | 0.0000000 | 1329.3193300 | 1329.3194026 |
| 2251:      | 16         | 4         | 12           | 1 15 4 11 0  |
| -0.0000054 | -0.0003000 | 0.0000000 | 1329.5797300 | 1329.5797354 |
| 2252:      | 17         | 4         | 13           | 1 16 4 12 0  |
| 0.0001223  | -0.0003000 | 0.0000000 | 1329.8401400 | 1329.8400177 |
| 2253:      | 18         | 4         | 14           | 1 17 4 13 0  |
| -0.0000688 | -0.0003000 | 0.0000000 | 1330.1001900 | 1330.1002588 |
| 2254:      | 19         | 4         | 15           | 1 18 4 14 0  |
| -0.0001791 | -0.0003000 | 0.0000000 | 1330.3602900 | 1330.3604691 |
| 2255:      | 20         | 4         | 16           | 1 19 4 15 0  |
| 0.0000298  | -0.0003000 | 0.0000000 | 1330.6206900 | 1330.6206602 |
| 2256:      | 21         | 4         | 17           | 1 20 4 16 0  |
| -0.0003848 | -0.0003000 | 0.0000000 | 1330.8804600 | 1330.8808448 |
| 2257:      | 26         | 4         | 22           | 1 25 4 21 0  |
| -0.0002468 | -0.0003000 | 0.0000000 | 1332.1820000 | 1332.1822468 |
| 2258:      | 27         | 4         | 23           | 1 26 4 22 0  |
| -0.0003977 | -0.0003000 | 0.0000000 | 1332.4423700 | 1332.4427677 |
| 2259:      | 29         | 4         | 25           | 1 28 4 24 0  |
| -0.0002018 | -0.0003000 | 0.0000000 | 1332.9640600 | 1332.9642618 |
| 2260:      | 30         | 4         | 26           | 1 29 4 25 0  |
| 0.0000787  | -0.0003000 | 0.0000000 | 1333.2253800 | 1333.2253013 |
| 2261:      | 32         | 4         | 28           | 1 31 4 27 0  |
| -0.0000838 | -0.0003000 | 0.0000000 | 1333.7480700 | 1333.7481538 |
| 2262:      | 33         | 4         | 29           | 1 32 4 28 0  |
| 0.0000884  | -0.0003000 | 0.0000000 | 1334.0101400 | 1334.0100516 |
| 2263:      | 34         | 4         | 30           | 1 33 4 29 0  |
| 0.0001656  | -0.0003000 | 0.0000000 | 1334.2724900 | 1334.2723244 |
| 2264:      | 35         | 4         | 31           | 1 34 4 30 0  |
| 0.0002898  | -0.0003000 | 0.0000000 | 1334.5353100 | 1334.5350202 |
| 2265:      | 36         | 4         | 32           | 1 35 4 31 0  |
| 0.0001922  | -0.0003000 | 0.0000000 | 1334.7983800 | 1334.7981878 |
| 2266:      | 38         | 4         | 34           | 1 37 4 33 0  |
| -0.0000206 | -0.0003000 | 0.0000000 | 1335.3261100 | 1335.3261306 |
| 2267:      | 39         | 4         | 35           | 1 38 4 34 0  |
| 0.0001844  | -0.0003000 | 0.0000000 | 1335.5911800 | 1335.5909956 |
| 2268:      | 40         | 4         | 36           | 1 39 4 35 0  |
| 0.0000023  | -0.0003000 | 0.0000000 | 1335.8565100 | 1335.8565077 |
| 2269:      | 41         | 4         | 37           | 1 40 4 36 0  |
| 0.0000445  | -0.0003000 | 0.0000000 | 1336.1227400 | 1336.1226955 |
| 2270:      | 42         | 4         | 38           | 1 41 4 37 0  |
| 0.0000834  | -0.0003000 | 0.0000000 | 1336.3896600 | 1336.3895766 |
| 2271:      | 43         | 4         | 39           | 1 42 4 38 0  |
| -0.0001643 | -0.0003000 | 0.0000000 | 1336.6569900 | 1336.6571543 |
| 2272:      | 44         | 4         | 40           | 1 43 4 39 0  |
| -0.0000555 | -0.0003000 | 0.0000000 | 1336.9253600 | 1336.9254155 |

|                                 |              |              |
|---------------------------------|--------------|--------------|
| 2273: 45 4 41 1 44 4 40 0       | 1337.1942200 | 1337.1943278 |
| -0.0001078 -0.0003000 0.0000000 |              |              |
| 2274: 46 4 42 1 45 4 41 0       | 1337.4639900 | 1337.4638379 |
| 0.0001521 -0.0003000 0.0000000  |              |              |
| 2275: 47 4 43 1 46 4 42 0       | 1337.7338300 | 1337.7338704 |
| -0.0000404 -0.0003000 0.0000000 |              |              |
| 2276: 48 4 44 1 47 4 43 0       | 1338.0043400 | 1338.0043278 |
| 0.0000122 -0.0003000 0.0000000  |              |              |
| 2277: 49 4 45 1 48 4 44 0       | 1338.2747200 | 1338.2750917 |
| -0.0003717 -0.0003000 0.0000000 |              |              |
| 2278: 50 4 46 1 49 4 45 0       | 1338.5458900 | 1338.5460247 |
| -0.0001347 -0.0003000 0.0000000 |              |              |
| 2279: 51 4 47 1 50 4 46 0       | 1338.8168400 | 1338.8169735 |
| -0.0001335 -0.0003000 0.0000000 |              |              |
| 2280: 52 4 48 1 51 4 47 0       | 1339.0877900 | 1339.0877733 |
| 0.0000167 -0.0003000 0.0000000  |              |              |
| 2281: 53 4 49 1 52 4 48 0       | 1339.3579800 | 1339.3582521 |
| -0.0002721 -0.0003000 0.0000000 |              |              |
| 2282: 54 4 50 1 53 4 49 0       | 1339.6282500 | 1339.6282348 |
| 0.0000152 -0.0003000 0.0000000  |              |              |
| 2283: 55 4 51 1 54 4 50 0       | 1339.8973200 | 1339.8975482 |
| -0.0002282 -0.0003000 0.0000000 |              |              |
| 2284: 56 4 52 1 55 4 51 0       | 1340.1659700 | 1340.1660243 |
| -0.0000543 -0.0003000 0.0000000 |              |              |
| 2285: 57 4 53 1 56 4 52 0       | 1340.4333700 | 1340.4335037 |
| -0.0001337 -0.0003000 0.0000000 |              |              |
| 2286: 58 4 54 1 57 4 53 0       | 1340.6996700 | 1340.6998370 |
| -0.0001670 -0.0003000 0.0000000 |              |              |
| 2287: 59 4 55 1 58 4 54 0       | 1340.9649400 | 1340.9648867 |
| 0.0000533 -0.0003000 0.0000000  |              |              |
| 2288: 61 4 57 1 60 4 56 0       | 1341.4907200 | 1341.4906446 |
| 0.0000754 -0.0003000 0.0000000  |              |              |
| 2289: 62 4 58 1 61 4 57 0       | 1341.7509100 | 1341.7511356 |
| -0.0002256 -0.0003000 0.0000000 |              |              |
| 2290: 63 4 59 1 62 4 58 0       | 1342.0098200 | 1342.0099071 |
| -0.0000871 -0.0003000 0.0000000 |              |              |
| 2291: 64 4 60 1 63 4 59 0       | 1342.2667400 | 1342.2668742 |
| -0.0001342 -0.0003000 0.0000000 |              |              |
| 2292: 65 4 61 1 64 4 60 0       | 1342.5217000 | 1342.5219599 |
| -0.0002599 -0.0003000 0.0000000 |              |              |
| 2293: 66 4 62 1 65 4 61 0       | 1342.7750200 | 1342.7750935 |
| -0.0000735 -0.0003000 0.0000000 |              |              |
| 2294: 67 4 63 1 66 4 62 0       | 1343.0261900 | 1343.0262103 |
| -0.0000203 -0.0003000 0.0000000 |              |              |
| 2295: 68 4 64 1 67 4 63 0       | 1343.2752000 | 1343.2752515 |
| -0.0000515 -0.0003000 0.0000000 |              |              |
| 2296: 69 4 65 1 68 4 64 0       | 1343.5220500 | 1343.5221639 |
| -0.0001139 -0.0003000 0.0000000 |              |              |
| 2297: 70 4 66 1 69 4 65 0       | 1343.7669800 | 1343.7669011 |
| 0.0000789 -0.0003000 0.0000000  |              |              |
| 2298: 71 4 67 1 70 4 66 0       | 1344.0095800 | 1344.0094240 |
| 0.0001560 -0.0003000 0.0000000  |              |              |
| 2299: 72 4 68 1 71 4 67 0       | 1344.2497100 | 1344.2497026 |
| 0.0000074 -0.0003000 0.0000000  |              |              |
| 2300: 73 4 69 1 72 4 68 0       | 1344.4877400 | 1344.4877174 |
| 0.0000226 -0.0003000 0.0000000  |              |              |
| 2301: 74 4 70 1 73 4 69 0       | 1344.7236900 | 1344.7234615 |
| 0.0002285 -0.0003000 0.0000000  |              |              |
| 2302: 75 4 71 1 74 4 70 0       | 1344.9568200 | 1344.9569424 |
| -0.0001224 -0.0003000 0.0000000 |              |              |
| 2303: 76 4 72 1 75 4 71 0       | 1345.1881900 | 1345.1881840 |
| 0.0000060 -0.0003000 0.0000000  |              |              |
| 2304: 78 4 74 1 77 4 73 0       | 1345.6439900 | 1345.6441361 |
| -0.0001461 -0.0003000 0.0000000 |              |              |
| 2305: 79 4 75 1 78 4 74 0       | 1345.8691000 | 1345.8689879 |

|            |                  |           |              |              |
|------------|------------------|-----------|--------------|--------------|
| 0.0001121  | -0.0003000       | 0.0000000 |              |              |
| 2306: 80   | 4 76 1 79 4 75 0 |           | 1346.0916600 | 1346.0918837 |
| -0.0002237 | -0.0003000       | 0.0000000 |              |              |
| 2307: 81   | 4 77 1 80 4 76 0 |           | 1346.3127500 | 1346.3129415 |
| -0.0001915 | -0.0003000       | 0.0000000 |              |              |
| 2308: 82   | 4 78 1 81 4 77 0 |           | 1346.5325100 | 1346.5322954 |
| 0.0002146  | -0.0003000       | 0.0000000 |              |              |
| 2309: 83   | 4 79 1 82 4 78 0 |           | 1346.7502800 | 1346.7500932 |
| 0.0001868  | -0.0003000       | 0.0000000 |              |              |
| 2310: 84   | 4 80 1 83 4 79 0 |           | 1346.9659400 | 1346.9664922 |
| -0.0005522 | -0.0003000       | 0.0000000 |              |              |
| 2311: 86   | 4 82 1 85 4 81 0 |           | 1347.3956900 | 1347.3957484 |
| -0.0000584 | -0.0003000       | 0.0000000 |              |              |
| 2312: 85   | 4 82 1 86 4 83 0 |           | 1302.6137900 | 1302.6141798 |
| -0.0003898 | -0.0003000       | 0.0000000 |              |              |
| 2313: 84   | 4 81 1 85 4 82 0 |           | 1302.8773400 | 1302.8774467 |
| -0.0001067 | -0.0003000       | 0.0000000 |              |              |
| 2314: 83   | 4 80 1 84 4 81 0 |           | 1303.1409800 | 1303.1406812 |
| 0.0002988  | -0.0003000       | 0.0000000 |              |              |
| 2315: 82   | 4 79 1 83 4 80 0 |           | 1303.4041300 | 1303.4038886 |
| 0.0002414  | -0.0003000       | 0.0000000 |              |              |
| 2316: 81   | 4 78 1 82 4 79 0 |           | 1303.6677500 | 1303.6670744 |
| 0.0006756  | -0.0003000       | 0.0000000 |              |              |
| 2317: 72   | 4 69 1 73 4 70 0 |           | 1306.0359700 | 1306.0359574 |
| 0.0000126  | -0.0003000       | 0.0000000 |              |              |
| 2318: 71   | 4 68 1 72 4 69 0 |           | 1306.2991600 | 1306.2993432 |
| -0.0001832 | -0.0003000       | 0.0000000 |              |              |
| 2319: 70   | 4 67 1 71 4 68 0 |           | 1306.5630100 | 1306.5627984 |
| 0.0002116  | -0.0003000       | 0.0000000 |              |              |
| 2320: 69   | 4 66 1 70 4 67 0 |           | 1306.8263000 | 1306.8263325 |
| -0.0000325 | -0.0003000       | 0.0000000 |              |              |
| 2321: 68   | 4 65 1 69 4 66 0 |           | 1307.0897100 | 1307.0899553 |
| -0.0002453 | -0.0003000       | 0.0000000 |              |              |
| 2322: 67   | 4 64 1 68 4 65 0 |           | 1307.3538200 | 1307.3536763 |
| 0.0001437  | -0.0003000       | 0.0000000 |              |              |
| 2323: 66   | 4 63 1 67 4 64 0 |           | 1307.6174200 | 1307.6175047 |
| -0.0000847 | -0.0003000       | 0.0000000 |              |              |
| 2324: 65   | 4 62 1 66 4 63 0 |           | 1307.8816200 | 1307.8814497 |
| 0.0001703  | -0.0003000       | 0.0000000 |              |              |
| 2325: 64   | 4 61 1 65 4 62 0 |           | 1308.1456300 | 1308.1455198 |
| 0.0001102  | -0.0003000       | 0.0000000 |              |              |
| 2326: 63   | 4 60 1 64 4 61 0 |           | 1308.4094800 | 1308.4097231 |
| -0.0002431 | -0.0003000       | 0.0000000 |              |              |
| 2327: 62   | 4 59 1 63 4 60 0 |           | 1308.6742400 | 1308.6740672 |
| 0.0001728  | -0.0003000       | 0.0000000 |              |              |
| 2328: 61   | 4 58 1 62 4 59 0 |           | 1308.9385700 | 1308.9385590 |
| 0.0000110  | -0.0003000       | 0.0000000 |              |              |
| 2329: 60   | 4 57 1 61 4 58 0 |           | 1309.2034200 | 1309.2032047 |
| 0.0002153  | -0.0003000       | 0.0000000 |              |              |
| 2330: 59   | 4 56 1 60 4 57 0 |           | 1309.4682100 | 1309.4680097 |
| 0.0002003  | -0.0003000       | 0.0000000 |              |              |
| 2331: 58   | 4 55 1 59 4 56 0 |           | 1309.7330500 | 1309.7329783 |
| 0.0000717  | -0.0003000       | 0.0000000 |              |              |
| 2332: 57   | 4 54 1 58 4 55 0 |           | 1309.9981400 | 1309.9981141 |
| 0.0000259  | -0.0003000       | 0.0000000 |              |              |
| 2333: 56   | 4 53 1 57 4 54 0 |           | 1310.2636300 | 1310.2634197 |
| 0.0002103  | -0.0003000       | 0.0000000 |              |              |
| 2334: 55   | 4 52 1 56 4 53 0 |           | 1310.5287800 | 1310.5288964 |
| -0.0001164 | -0.0003000       | 0.0000000 |              |              |
| 2335: 54   | 4 51 1 55 4 52 0 |           | 1310.7946000 | 1310.7945446 |
| 0.0000554  | -0.0003000       | 0.0000000 |              |              |
| 2336: 53   | 4 50 1 54 4 51 0 |           | 1311.0603800 | 1311.0603634 |
| 0.0000166  | -0.0003000       | 0.0000000 |              |              |
| 2337: 52   | 4 49 1 53 4 50 0 |           | 1311.3267300 | 1311.3263508 |
| 0.0003792  | -0.0003000       | 0.0000000 |              |              |

|                                 |              |              |
|---------------------------------|--------------|--------------|
| 2338: 51 4 48 1 52 4 49 0       | 1311.5924900 | 1311.5925037 |
| -0.0000137 -0.0003000 0.0000000 |              |              |
| 2339: 50 4 47 1 51 4 48 0       | 1311.8590600 | 1311.8588175 |
| 0.0002425 -0.0003000 0.0000000  |              |              |
| 2340: 49 4 46 1 50 4 47 0       | 1312.1252600 | 1312.1252867 |
| -0.0000267 -0.0003000 0.0000000 |              |              |
| 2341: 48 4 45 1 49 4 46 0       | 1312.3919800 | 1312.3919043 |
| 0.0000757 -0.0003000 0.0000000  |              |              |
| 2342: 47 4 44 1 48 4 45 0       | 1312.6588300 | 1312.6586624 |
| 0.0001676 -0.0003000 0.0000000  |              |              |
| 2343: 46 4 43 1 47 4 44 0       | 1312.9257500 | 1312.9255517 |
| 0.0001983 -0.0003000 0.0000000  |              |              |
| 2344: 45 4 42 1 46 4 43 0       | 1313.1925700 | 1313.1925620 |
| 0.0000080 -0.0003000 0.0000000  |              |              |
| 2345: 44 4 41 1 45 4 42 0       | 1313.4600200 | 1313.4596819 |
| 0.0003381 -0.0003000 0.0000000  |              |              |
| 2346: 43 4 40 1 44 4 41 0       | 1313.7270400 | 1313.7268991 |
| 0.0001409 -0.0003000 0.0000000  |              |              |
| 2347: 42 4 39 1 43 4 40 0       | 1313.9942600 | 1313.9942005 |
| 0.0000595 -0.0003000 0.0000000  |              |              |
| 2348: 41 4 38 1 42 4 39 0       | 1314.2617700 | 1314.2615722 |
| 0.0001978 -0.0003000 0.0000000  |              |              |
| 2349: 39 4 36 1 40 4 37 0       | 1314.7966300 | 1314.7964678 |
| 0.0001622 -0.0003000 0.0000000  |              |              |
| 2350: 38 4 35 1 39 4 36 0       | 1315.0638000 | 1315.0639611 |
| -0.0001611 -0.0003000 0.0000000 |              |              |
| 2351: 37 4 34 1 38 4 35 0       | 1315.3312500 | 1315.3314639 |
| -0.0002139 -0.0003000 0.0000000 |              |              |
| 2352: 29 4 26 1 30 4 27 0       | 1317.4699900 | 1317.4699799 |
| 0.0000101 -0.0003000 0.0000000  |              |              |
| 2353: 28 4 25 1 29 4 26 0       | 1317.7367800 | 1317.7368926 |
| -0.0001126 -0.0003000 0.0000000 |              |              |
| 2354: 27 4 24 1 28 4 25 0       | 1318.0036900 | 1318.0036749 |
| 0.0000151 -0.0003000 0.0000000  |              |              |
| 2355: 22 4 19 1 23 4 20 0       | 1319.3348800 | 1319.3353204 |
| -0.0004404 -0.0003000 0.0000000 |              |              |
| 2356: 21 4 18 1 22 4 19 0       | 1319.6007800 | 1319.6011480 |
| -0.0003680 -0.0003000 0.0000000 |              |              |
| 2357: 20 4 17 1 21 4 18 0       | 1319.8665200 | 1319.8667968 |
| -0.0002768 -0.0003000 0.0000000 |              |              |
| 2358: 19 4 16 1 20 4 17 0       | 1320.1320100 | 1320.1322637 |
| -0.0002537 -0.0003000 0.0000000 |              |              |
| 2359: 18 4 15 1 19 4 16 0       | 1320.3973600 | 1320.3975463 |
| -0.0001863 -0.0003000 0.0000000 |              |              |
| 2360: 17 4 14 1 18 4 15 0       | 1320.6624300 | 1320.6626430 |
| -0.0002130 -0.0003000 0.0000000 |              |              |
| 2361: 16 4 13 1 17 4 14 0       | 1320.9274100 | 1320.9275527 |
| -0.0001427 -0.0003000 0.0000000 |              |              |
| 2362: 15 4 12 1 16 4 13 0       | 1321.1922700 | 1321.1922753 |
| -0.0000053 -0.0003000 0.0000000 |              |              |
| 2363: 14 4 11 1 15 4 12 0       | 1321.4567000 | 1321.4568109 |
| -0.0001109 -0.0003000 0.0000000 |              |              |
| 2364: 13 4 10 1 14 4 11 0       | 1321.7210700 | 1321.7211604 |
| -0.0000904 -0.0003000 0.0000000 |              |              |
| 2365: 12 4 9 1 13 4 10 0        | 1321.9852000 | 1321.9853248 |
| -0.0001248 -0.0003000 0.0000000 |              |              |
| 2366: 11 4 8 1 12 4 9 0         | 1322.2492600 | 1322.2493059 |
| -0.0000459 -0.0003000 0.0000000 |              |              |
| 2367: 10 4 7 1 11 4 8 0         | 1322.5131500 | 1322.5131056 |
| 0.0000444 -0.0003000 0.0000000  |              |              |
| 2368: 9 4 6 1 10 4 7 0          | 1322.7767900 | 1322.7767261 |
| 0.0000639 -0.0003000 0.0000000  |              |              |
| 2369: 8 4 5 1 9 4 6 0           | 1323.0401800 | 1323.0401699 |
| 0.0000101 -0.0003000 0.0000000  |              |              |
| 2370: 7 4 4 1 8 4 5 0           | 1323.3034100 | 1323.3034400 |

|            |            |           |              |              |
|------------|------------|-----------|--------------|--------------|
| -0.0000300 | -0.0003000 | 0.0000000 |              |              |
| 2371:      | 6          | 4         | 3            | 1 7 4 4 0    |
| 0.0001209  | -0.0003000 | 0.0000000 | 1323.5666600 | 1323.5665391 |
| 2372:      | 5          | 4         | 2            | 1 6 4 3 0    |
| -0.0000606 | -0.0003000 | 0.0000000 | 1323.8294100 | 1323.8294706 |
| 2373:      | 4          | 4         | 1            | 1 5 4 2 0    |
| -0.0001477 | -0.0003000 | 0.0000000 | 1324.0920900 | 1324.0922377 |
| 2374:      | 5          | 4         | 2            | 1 4 4 1 0    |
| -0.0000531 | -0.0003000 | 0.0000000 | 1326.7116500 | 1326.7117031 |
| 2375:      | 6          | 4         | 3            | 1 5 4 2 0    |
| 0.0001287  | -0.0003000 | 0.0000000 | 1326.9730500 | 1326.9729213 |
| 2376:      | 7          | 4         | 4            | 1 6 4 3 0    |
| 0.0000045  | -0.0003000 | 0.0000000 | 1327.2340300 | 1327.2340255 |
| 2377:      | 8          | 4         | 5            | 1 7 4 4 0    |
| 0.0000296  | -0.0003000 | 0.0000000 | 1327.4950500 | 1327.4950204 |
| 2378:      | 9          | 4         | 6            | 1 8 4 5 0    |
| -0.0001311 | -0.0003000 | 0.0000000 | 1327.7557800 | 1327.7559111 |
| 2379:      | 10         | 4         | 7            | 1 9 4 6 0    |
| -0.0001925 | -0.0003000 | 0.0000000 | 1328.0165100 | 1328.0167025 |
| 2380:      | 11         | 4         | 8            | 1 10 4 7 0   |
| 0.0001304  | -0.0003000 | 0.0000000 | 1328.2775300 | 1328.2773996 |
| 2381:      | 12         | 4         | 9            | 1 11 4 8 0   |
| 0.0000126  | -0.0003000 | 0.0000000 | 1328.5380200 | 1328.5380074 |
| 2382:      | 13         | 4         | 10           | 1 12 4 9 0   |
| -0.0002208 | -0.0003000 | 0.0000000 | 1328.7983100 | 1328.7985308 |
| 2383:      | 14         | 4         | 11           | 1 13 4 10 0  |
| 0.0000354  | -0.0003000 | 0.0000000 | 1329.0590100 | 1329.0589746 |
| 2384:      | 15         | 4         | 12           | 1 14 4 11 0  |
| -0.0000133 | -0.0003000 | 0.0000000 | 1329.3193300 | 1329.3193433 |
| 2385:      | 16         | 4         | 13           | 1 15 4 12 0  |
| 0.0000889  | -0.0003000 | 0.0000000 | 1329.5797300 | 1329.5796411 |
| 2386:      | 17         | 4         | 14           | 1 16 4 13 0  |
| 0.0002679  | -0.0003000 | 0.0000000 | 1329.8401400 | 1329.8398721 |
| 2387:      | 18         | 4         | 15           | 1 17 4 14 0  |
| 0.0001503  | -0.0003000 | 0.0000000 | 1330.1001900 | 1330.1000397 |
| 2388:      | 19         | 4         | 16           | 1 18 4 15 0  |
| 0.0001432  | -0.0003000 | 0.0000000 | 1330.3602900 | 1330.3601468 |
| 2389:      | 20         | 4         | 17           | 1 19 4 16 0  |
| 0.0004945  | -0.0003000 | 0.0000000 | 1330.6206900 | 1330.6201955 |
| 2390:      | 21         | 4         | 18           | 1 20 4 17 0  |
| 0.0002726  | -0.0003000 | 0.0000000 | 1330.8804600 | 1330.8801874 |
| 2391:      | 26         | 4         | 23           | 1 25 4 22 0  |
| 0.0002014  | -0.0003000 | 0.0000000 | 1332.1794700 | 1332.1792686 |
| 2392:      | 28         | 4         | 25           | 1 27 4 24 0  |
| -0.0000628 | -0.0003000 | 0.0000000 | 1332.6983600 | 1332.6984228 |
| 2393:      | 29         | 4         | 26           | 1 28 4 25 0  |
| -0.0001985 | -0.0003000 | 0.0000000 | 1332.9576700 | 1332.9578685 |
| 2394:      | 30         | 4         | 27           | 1 29 4 26 0  |
| 0.0001385  | -0.0003000 | 0.0000000 | 1333.2173500 | 1333.2172115 |
| 2395:      | 33         | 4         | 30           | 1 32 4 29 0  |
| -0.0001263 | -0.0003000 | 0.0000000 | 1333.9943500 | 1333.9944763 |
| 2396:      | 34         | 4         | 31           | 1 33 4 30 0  |
| 0.0001397  | -0.0003000 | 0.0000000 | 1334.2533900 | 1334.2532503 |
| 2397:      | 35         | 4         | 32           | 1 34 4 31 0  |
| 0.0002576  | -0.0003000 | 0.0000000 | 1334.5120900 | 1334.5118324 |
| 2398:      | 36         | 4         | 33           | 1 35 4 32 0  |
| -0.0000487 | -0.0003000 | 0.0000000 | 1334.7701500 | 1334.7701987 |
| 2399:      | 37         | 4         | 34           | 1 36 4 33 0  |
| 0.0001462  | -0.0003000 | 0.0000000 | 1335.0284700 | 1335.0283238 |
| 2400:      | 38         | 4         | 35           | 1 37 4 34 0  |
| 0.0001696  | -0.0003000 | 0.0000000 | 1335.2863500 | 1335.2861804 |
| 2401:      | 40         | 4         | 37           | 1 39 4 36 0  |
| -0.0002323 | -0.0003000 | 0.0000000 | 1335.8007400 | 1335.8009723 |
| 2402:      | 41         | 4         | 38           | 1 40 4 37 0  |
| -0.0001165 | -0.0003000 | 0.0000000 | 1336.0577300 | 1336.0578465 |

|            |            |           |    |   |    |   |    |   |              |              |
|------------|------------|-----------|----|---|----|---|----|---|--------------|--------------|
| 2403:      | 42         | 4         | 39 | 1 | 41 | 4 | 38 | 0 | 1336.3144800 | 1336.3143307 |
| 0.0001493  | -0.0003000 | 0.0000000 |    |   |    |   |    |   |              |              |
| 2404:      | 43         | 4         | 40 | 1 | 42 | 4 | 39 | 0 | 1336.5697100 | 1336.5703924 |
| -0.0006824 | -0.0003000 | 0.0000000 |    |   |    |   |    |   |              |              |
| 2405:      | 44         | 4         | 41 | 1 | 43 | 4 | 40 | 0 | 1336.8260400 | 1336.8259988 |
| 0.0000412  | -0.0003000 | 0.0000000 |    |   |    |   |    |   |              |              |
| 2406:      | 45         | 4         | 42 | 1 | 44 | 4 | 41 | 0 | 1337.0810200 | 1337.0811169 |
| -0.0000969 | -0.0003000 | 0.0000000 |    |   |    |   |    |   |              |              |
| 2407:      | 46         | 4         | 43 | 1 | 45 | 4 | 42 | 0 | 1337.3357700 | 1337.3357140 |
| 0.0000560  | -0.0003000 | 0.0000000 |    |   |    |   |    |   |              |              |
| 2408:      | 47         | 4         | 44 | 1 | 46 | 4 | 43 | 0 | 1337.5896900 | 1337.5897576 |
| -0.0000676 | -0.0003000 | 0.0000000 |    |   |    |   |    |   |              |              |
| 2409:      | 48         | 4         | 45 | 1 | 47 | 4 | 44 | 0 | 1337.8431600 | 1337.8432161 |
| -0.0000561 | -0.0003000 | 0.0000000 |    |   |    |   |    |   |              |              |
| 2410:      | 50         | 4         | 47 | 1 | 49 | 4 | 46 | 0 | 1338.3482900 | 1338.3482547 |
| 0.0000353  | -0.0003000 | 0.0000000 |    |   |    |   |    |   |              |              |
| 2411:      | 51         | 4         | 48 | 1 | 50 | 4 | 47 | 0 | 1338.5997600 | 1338.5997764 |
| -0.0000164 | -0.0003000 | 0.0000000 |    |   |    |   |    |   |              |              |
| 2412:      | 52         | 4         | 49 | 1 | 51 | 4 | 48 | 0 | 1338.8506100 | 1338.8505965 |
| 0.0000135  | -0.0003000 | 0.0000000 |    |   |    |   |    |   |              |              |
| 2413:      | 53         | 4         | 50 | 1 | 52 | 4 | 49 | 0 | 1339.1006200 | 1339.1006893 |
| -0.0000693 | -0.0003000 | 0.0000000 |    |   |    |   |    |   |              |              |
| 2414:      | 54         | 4         | 51 | 1 | 53 | 4 | 50 | 0 | 1339.3499100 | 1339.3500312 |
| -0.0001212 | -0.0003000 | 0.0000000 |    |   |    |   |    |   |              |              |
| 2415:      | 55         | 4         | 52 | 1 | 54 | 4 | 51 | 0 | 1339.5981700 | 1339.5986002 |
| -0.0004302 | -0.0003000 | 0.0000000 |    |   |    |   |    |   |              |              |
| 2416:      | 56         | 4         | 53 | 1 | 55 | 4 | 52 | 0 | 1339.8463600 | 1339.8463766 |
| -0.0000166 | -0.0003000 | 0.0000000 |    |   |    |   |    |   |              |              |
| 2417:      | 58         | 4         | 55 | 1 | 57 | 4 | 54 | 0 | 1340.3394700 | 1340.3394825 |
| -0.0000125 | -0.0003000 | 0.0000000 |    |   |    |   |    |   |              |              |
| 2418:      | 59         | 4         | 56 | 1 | 58 | 4 | 55 | 0 | 1340.5847300 | 1340.5847833 |
| -0.0000533 | -0.0003000 | 0.0000000 |    |   |    |   |    |   |              |              |
| 2419:      | 60         | 4         | 57 | 1 | 59 | 4 | 56 | 0 | 1340.8292200 | 1340.8292339 |
| -0.0000139 | -0.0003000 | 0.0000000 |    |   |    |   |    |   |              |              |
| 2420:      | 61         | 4         | 58 | 1 | 60 | 4 | 57 | 0 | 1341.0725400 | 1341.0728258 |
| -0.0002858 | -0.0003000 | 0.0000000 |    |   |    |   |    |   |              |              |
| 2421:      | 62         | 4         | 59 | 1 | 61 | 4 | 58 | 0 | 1341.3154700 | 1341.3155526 |
| -0.0000826 | -0.0003000 | 0.0000000 |    |   |    |   |    |   |              |              |
| 2422:      | 63         | 4         | 60 | 1 | 62 | 4 | 59 | 0 | 1341.5574400 | 1341.5574105 |
| 0.0000295  | -0.0003000 | 0.0000000 |    |   |    |   |    |   |              |              |
| 2423:      | 64         | 4         | 61 | 1 | 63 | 4 | 60 | 0 | 1341.7984100 | 1341.7983979 |
| 0.0000121  | -0.0003000 | 0.0000000 |    |   |    |   |    |   |              |              |
| 2424:      | 65         | 4         | 62 | 1 | 64 | 4 | 61 | 0 | 1342.0383700 | 1342.0385156 |
| -0.0001456 | -0.0003000 | 0.0000000 |    |   |    |   |    |   |              |              |
| 2425:      | 66         | 4         | 63 | 1 | 65 | 4 | 62 | 0 | 1342.2777100 | 1342.2777663 |
| -0.0000563 | -0.0003000 | 0.0000000 |    |   |    |   |    |   |              |              |
| 2426:      | 67         | 4         | 64 | 1 | 66 | 4 | 63 | 0 | 1342.5159900 | 1342.5161553 |
| -0.0001653 | -0.0003000 | 0.0000000 |    |   |    |   |    |   |              |              |
| 2427:      | 68         | 4         | 65 | 1 | 67 | 4 | 64 | 0 | 1342.7538800 | 1342.7536895 |
| 0.0001905  | -0.0003000 | 0.0000000 |    |   |    |   |    |   |              |              |
| 2428:      | 70         | 4         | 67 | 1 | 69 | 4 | 66 | 0 | 1343.2262400 | 1343.2262314 |
| 0.0000086  | -0.0003000 | 0.0000000 |    |   |    |   |    |   |              |              |
| 2429:      | 71         | 4         | 68 | 1 | 70 | 4 | 67 | 0 | 1343.4611500 | 1343.4612623 |
| -0.0001123 | -0.0003000 | 0.0000000 |    |   |    |   |    |   |              |              |
| 2430:      | 72         | 4         | 69 | 1 | 71 | 4 | 68 | 0 | 1343.6952500 | 1343.6954845 |
| -0.0002345 | -0.0003000 | 0.0000000 |    |   |    |   |    |   |              |              |
| 2431:      | 74         | 4         | 71 | 1 | 73 | 4 | 70 | 0 | 1344.1614500 | 1344.1615643 |
| -0.0001143 | -0.0003000 | 0.0000000 |    |   |    |   |    |   |              |              |
| 2432:      | 75         | 4         | 72 | 1 | 74 | 4 | 71 | 0 | 1344.3934400 | 1344.3934554 |
| -0.0000154 | -0.0003000 | 0.0000000 |    |   |    |   |    |   |              |              |
| 2433:      | 77         | 4         | 74 | 1 | 76 | 4 | 73 | 0 | 1344.8547000 | 1344.8550290 |
| -0.0003290 | -0.0003000 | 0.0000000 |    |   |    |   |    |   |              |              |
| 2434:      | 78         | 4         | 75 | 1 | 77 | 4 | 74 | 0 | 1345.0850400 | 1345.0847488 |
| 0.0002912  | -0.0003000 | 0.0000000 |    |   |    |   |    |   |              |              |
| 2435:      | 79         | 4         | 76 | 1 | 78 | 4 | 75 | 0 | 1345.3136700 | 1345.3137825 |

|            |            |           |              |              |
|------------|------------|-----------|--------------|--------------|
| -0.0001125 | -0.0003000 | 0.0000000 |              |              |
| 2436: 80   | 4 77 1 79  | 4 76 0    | 1345.5422600 | 1345.5421492 |
| 0.0001108  | -0.0003000 | 0.0000000 |              |              |
| 2437: 81   | 4 78 1 80  | 4 77 0    | 1345.7696900 | 1345.7698676 |
| -0.0001776 | -0.0003000 | 0.0000000 |              |              |
| 2438: 82   | 4 79 1 81  | 4 78 0    | 1345.9969500 | 1345.9969563 |
| -0.0000063 | -0.0003000 | 0.0000000 |              |              |
| 2439: 83   | 4 80 1 82  | 4 79 0    | 1346.2238000 | 1346.2234334 |
| 0.0003666  | -0.0003000 | 0.0000000 |              |              |
| 2440: 84   | 4 81 1 83  | 4 80 0    | 1346.4494100 | 1346.4493167 |
| 0.0000933  | -0.0003000 | 0.0000000 |              |              |
| 2441: 86   | 4 83 1 85  | 4 82 0    | 1346.8993000 | 1346.8993690 |
| -0.0000690 | -0.0003000 | 0.0000000 |              |              |
| 2442: 87   | 4 84 1 86  | 4 83 0    | 1347.1239300 | 1347.1235697 |
| 0.0003603  | -0.0003000 | 0.0000000 |              |              |
| 2443: 88   | 4 85 1 87  | 4 84 0    | 1347.3477700 | 1347.3472400 |
| 0.0005300  | -0.0003000 | 0.0000000 |              |              |
| 2444: 89   | 4 86 1 88  | 4 85 0    | 1347.5706000 | 1347.5703938 |
| 0.0002062  | -0.0003000 | 0.0000000 |              |              |
| 2445: 88   | 5 83 1 89  | 5 84 0    | 1301.3830100 | 1301.3817629 |
| 0.0012471  | -0.0003000 | 0.0000000 |              |              |
| 2446: 87   | 5 82 1 88  | 5 83 0    | 1301.6482900 | 1301.6477824 |
| 0.0005076  | -0.0003000 | 0.0000000 |              |              |
| 2447: 86   | 5 81 1 87  | 5 82 0    | 1301.9138600 | 1301.9142510 |
| -0.0003910 | -0.0003000 | 0.0000000 |              |              |
| 2448: 85   | 5 80 1 86  | 5 81 0    | 1302.1815500 | 1302.1811879 |
| 0.0003621  | -0.0003000 | 0.0000000 |              |              |
| 2449: 84   | 5 79 1 85  | 5 80 0    | 1302.4484700 | 1302.4486102 |
| -0.0001402 | -0.0003000 | 0.0000000 |              |              |
| 2450: 83   | 5 78 1 84  | 5 79 0    | 1302.7161500 | 1302.7165323 |
| -0.0003823 | -0.0003000 | 0.0000000 |              |              |
| 2451: 82   | 5 77 1 83  | 5 78 0    | 1302.9849100 | 1302.9849662 |
| -0.0000562 | -0.0003000 | 0.0000000 |              |              |
| 2452: 81   | 5 76 1 82  | 5 77 0    | 1303.2536500 | 1303.2539218 |
| -0.0002718 | -0.0003000 | 0.0000000 |              |              |
| 2453: 80   | 5 75 1 81  | 5 76 0    | 1303.5240500 | 1303.5234062 |
| 0.0006438  | -0.0003000 | 0.0000000 |              |              |
| 2454: 79   | 5 74 1 80  | 5 75 0    | 1303.7935700 | 1303.7934240 |
| 0.0001460  | -0.0003000 | 0.0000000 |              |              |
| 2455: 78   | 5 73 1 79  | 5 74 0    | 1304.0641500 | 1304.0639766 |
| 0.0001734  | -0.0003000 | 0.0000000 |              |              |
| 2456: 77   | 5 72 1 78  | 5 73 0    | 1304.3350000 | 1304.3350622 |
| -0.0000622 | -0.0003000 | 0.0000000 |              |              |
| 2457: 76   | 5 71 1 77  | 5 72 0    | 1304.6063400 | 1304.6066750 |
| -0.0003350 | -0.0003000 | 0.0000000 |              |              |
| 2458: 75   | 5 70 1 76  | 5 71 0    | 1304.8788500 | 1304.8788050 |
| 0.0000450  | -0.0003000 | 0.0000000 |              |              |
| 2459: 74   | 5 69 1 75  | 5 70 0    | 1305.1513300 | 1305.1514370 |
| -0.0001070 | -0.0003000 | 0.0000000 |              |              |
| 2460: 73   | 5 68 1 74  | 5 69 0    | 1305.4244400 | 1305.4245504 |
| -0.0001104 | -0.0003000 | 0.0000000 |              |              |
| 2461: 72   | 5 67 1 73  | 5 68 0    | 1305.6974900 | 1305.6981186 |
| -0.0006286 | -0.0003000 | 0.0000000 |              |              |
| 2462: 71   | 5 66 1 72  | 5 67 0    | 1305.9718700 | 1305.9721087 |
| -0.0002387 | -0.0003000 | 0.0000000 |              |              |
| 2463: 70   | 5 65 1 71  | 5 66 0    | 1306.2462700 | 1306.2464815 |
| -0.0002115 | -0.0003000 | 0.0000000 |              |              |
| 2464: 69   | 5 64 1 70  | 5 65 0    | 1306.5211200 | 1306.5211912 |
| -0.0000712 | -0.0003000 | 0.0000000 |              |              |
| 2465: 68   | 5 63 1 69  | 5 64 0    | 1306.7961200 | 1306.7961866 |
| -0.0000666 | -0.0003000 | 0.0000000 |              |              |
| 2466: 66   | 5 61 1 67  | 5 62 0    | 1307.3464900 | 1307.3468052 |
| -0.0003152 | -0.0003000 | 0.0000000 |              |              |
| 2467: 65   | 5 60 1 66  | 5 61 0    | 1307.6223900 | 1307.6223054 |
| 0.0000846  | -0.0003000 | 0.0000000 |              |              |

|                                 |              |              |
|---------------------------------|--------------|--------------|
| 2468: 64 5 59 1 65 5 60 0       | 1307.8981100 | 1307.8978484 |
| 0.0002616 -0.0003000 0.0000000  |              |              |
| 2469: 63 5 58 1 64 5 59 0       | 1308.1736200 | 1308.1733715 |
| 0.0002485 -0.0003000 0.0000000  |              |              |
| 2470: 62 5 57 1 63 5 58 0       | 1308.4486500 | 1308.4488144 |
| -0.0001644 -0.0003000 0.0000000 |              |              |
| 2471: 61 5 56 1 62 5 57 0       | 1308.7242900 | 1308.7241207 |
| 0.0001693 -0.0003000 0.0000000  |              |              |
| 2472: 60 5 55 1 61 5 56 0       | 1308.9994300 | 1308.9992394 |
| 0.0001906 -0.0003000 0.0000000  |              |              |
| 2473: 59 5 54 1 60 5 55 0       | 1309.2743300 | 1309.2741256 |
| 0.0002044 -0.0003000 0.0000000  |              |              |
| 2474: 58 5 53 1 59 5 54 0       | 1309.5487400 | 1309.5487412 |
| -0.0000012 -0.0003000 0.0000000 |              |              |
| 2475: 57 5 52 1 58 5 53 0       | 1309.8228500 | 1309.8230553 |
| -0.0002053 -0.0003000 0.0000000 |              |              |
| 2476: 56 5 51 1 57 5 52 0       | 1310.0971800 | 1310.0970441 |
| 0.0001359 -0.0003000 0.0000000  |              |              |
| 2477: 55 5 50 1 56 5 51 0       | 1310.3706100 | 1310.3706903 |
| -0.0000803 -0.0003000 0.0000000 |              |              |
| 2478: 54 5 49 1 55 5 50 0       | 1310.6439700 | 1310.6439829 |
| -0.0000129 -0.0003000 0.0000000 |              |              |
| 2479: 53 5 48 1 54 5 49 0       | 1310.9166100 | 1310.9169166 |
| -0.0003066 -0.0003000 0.0000000 |              |              |
| 2480: 52 5 47 1 53 5 48 0       | 1311.1897100 | 1311.1894906 |
| 0.0002194 -0.0003000 0.0000000  |              |              |
| 2481: 50 5 45 1 51 5 46 0       | 1311.7339400 | 1311.7335751 |
| 0.0003649 -0.0003000 0.0000000  |              |              |
| 2482: 49 5 44 1 50 5 45 0       | 1312.0051600 | 1312.0051007 |
| 0.0000593 -0.0003000 0.0000000  |              |              |
| 2483: 48 5 43 1 49 5 44 0       | 1312.2761500 | 1312.2762953 |
| -0.0001453 -0.0003000 0.0000000 |              |              |
| 2484: 47 5 42 1 48 5 43 0       | 1312.5472700 | 1312.5471704 |
| 0.0000996 -0.0003000 0.0000000  |              |              |
| 2485: 46 5 41 1 47 5 42 0       | 1312.8176300 | 1312.8177385 |
| -0.0001085 -0.0003000 0.0000000 |              |              |
| 2486: 45 5 40 1 46 5 41 0       | 1313.0880700 | 1313.0880119 |
| 0.0000581 -0.0003000 0.0000000  |              |              |
| 2487: 44 5 39 1 45 5 40 0       | 1313.3581000 | 1313.3580031 |
| 0.0000969 -0.0003000 0.0000000  |              |              |
| 2488: 43 5 38 1 44 5 39 0       | 1313.6277200 | 1313.6277243 |
| -0.0000043 -0.0003000 0.0000000 |              |              |
| 2489: 42 5 37 1 43 5 38 0       | 1313.8973300 | 1313.8971870 |
| 0.0001430 -0.0003000 0.0000000  |              |              |
| 2490: 41 5 36 1 42 5 37 0       | 1314.1665600 | 1314.1664021 |
| 0.0001579 -0.0003000 0.0000000  |              |              |
| 2491: 40 5 35 1 41 5 36 0       | 1314.4352500 | 1314.4353798 |
| -0.0001298 -0.0003000 0.0000000 |              |              |
| 2492: 33 5 28 1 34 5 29 0       | 1316.3127200 | 1316.3122561 |
| 0.0004639 -0.0003000 0.0000000  |              |              |
| 2493: 32 5 27 1 33 5 28 0       | 1316.5798900 | 1316.5796025 |
| 0.0002875 -0.0003000 0.0000000  |              |              |
| 2494: 31 5 26 1 32 5 27 0       | 1316.8472600 | 1316.8467676 |
| 0.0004924 -0.0003000 0.0000000  |              |              |
| 2495: 30 5 25 1 31 5 26 0       | 1317.1136500 | 1317.1137542 |
| -0.0001042 -0.0003000 0.0000000 |              |              |
| 2496: 29 5 24 1 30 5 25 0       | 1317.3807300 | 1317.3805649 |
| 0.0001651 -0.0003000 0.0000000  |              |              |
| 2497: 28 5 23 1 29 5 24 0       | 1317.6473500 | 1317.6472019 |
| 0.0001481 -0.0003000 0.0000000  |              |              |
| 2498: 27 5 22 1 28 5 23 0       | 1317.9138300 | 1317.9136670 |
| 0.0001630 -0.0003000 0.0000000  |              |              |
| 2499: 26 5 21 1 27 5 22 0       | 1318.1799700 | 1318.1799618 |
| 0.0000082 -0.0003000 0.0000000  |              |              |
| 2500: 25 5 20 1 26 5 21 0       | 1318.4460800 | 1318.4460874 |

|            |            |           |              |              |
|------------|------------|-----------|--------------|--------------|
| -0.0000074 | -0.0003000 | 0.0000000 |              |              |
| 2501: 24   | 5 19 1 25  | 5 20 0    | 1318.7121200 | 1318.7120451 |
| 0.0000749  | -0.0003000 | 0.0000000 |              |              |
| 2502: 23   | 5 18 1 24  | 5 19 0    | 1318.9778000 | 1318.9778357 |
| -0.0000357 | -0.0003000 | 0.0000000 |              |              |
| 2503: 22   | 5 17 1 23  | 5 18 0    | 1319.2434400 | 1319.2434600 |
| -0.0000200 | -0.0003000 | 0.0000000 |              |              |
| 2504: 21   | 5 16 1 22  | 5 17 0    | 1319.5088800 | 1319.5089188 |
| -0.0000388 | -0.0003000 | 0.0000000 |              |              |
| 2505: 20   | 5 15 1 21  | 5 16 0    | 1319.7742300 | 1319.7742126 |
| 0.0000174  | -0.0003000 | 0.0000000 |              |              |
| 2506: 19   | 5 14 1 20  | 5 15 0    | 1320.0393500 | 1320.0393422 |
| 0.0000078  | -0.0003000 | 0.0000000 |              |              |
| 2507: 18   | 5 13 1 19  | 5 14 0    | 1320.3043100 | 1320.3043081 |
| 0.0000019  | -0.0003000 | 0.0000000 |              |              |
| 2508: 11   | 5 6 1 12   | 5 7 0     | 1322.1543200 | 1322.1545384 |
| -0.0002184 | -0.0003000 | 0.0000000 |              |              |
| 2509: 10   | 5 5 1 11   | 5 6 0     | 1322.4181500 | 1322.4182185 |
| -0.0000685 | -0.0003000 | 0.0000000 |              |              |
| 2510: 9    | 5 4 1 10   | 5 5 0     | 1322.6818600 | 1322.6817416 |
| 0.0001184  | -0.0003000 | 0.0000000 |              |              |
| 2511: 8    | 5 3 1 9    | 5 4 0     | 1322.9450900 | 1322.9451088 |
| -0.0000188 | -0.0003000 | 0.0000000 |              |              |
| 2512: 7    | 5 2 1 8    | 5 3 0     | 1323.2081500 | 1323.2083212 |
| -0.0001712 | -0.0003000 | 0.0000000 |              |              |
| 2513: 6    | 5 1 1 7    | 5 2 0     | 1323.4713200 | 1323.4713799 |
| -0.0000599 | -0.0003000 | 0.0000000 |              |              |
| 2514: 5    | 5 0 1 6    | 5 1 0     | 1323.7341500 | 1323.7342863 |
| -0.0001363 | -0.0003000 | 0.0000000 |              |              |
| 2515: 6    | 5 1 1 5    | 5 0 0     | 1326.8779700 | 1326.8778507 |
| 0.0001193  | -0.0003000 | 0.0000000 |              |              |
| 2516: 7    | 5 2 1 6    | 5 1 0     | 1327.1390300 | 1327.1389275 |
| 0.0001025  | -0.0003000 | 0.0000000 |              |              |
| 2517: 8    | 5 3 1 7    | 5 2 0     | 1327.3998000 | 1327.3998776 |
| -0.0000776 | -0.0003000 | 0.0000000 |              |              |
| 2518: 9    | 5 4 1 8    | 5 3 0     | 1327.6604700 | 1327.6607036 |
| -0.0002336 | -0.0003000 | 0.0000000 |              |              |
| 2519: 10   | 5 5 1 9    | 5 4 0     | 1327.9212900 | 1327.9214077 |
| -0.0001177 | -0.0003000 | 0.0000000 |              |              |
| 2520: 11   | 5 6 1 10   | 5 5 0     | 1328.1818900 | 1328.1819924 |
| -0.0001024 | -0.0003000 | 0.0000000 |              |              |
| 2521: 12   | 5 7 1 11   | 5 6 0     | 1328.4424800 | 1328.4424604 |
| 0.0000196  | -0.0003000 | 0.0000000 |              |              |
| 2522: 13   | 5 8 1 12   | 5 7 0     | 1328.7028700 | 1328.7028142 |
| 0.0000558  | -0.0003000 | 0.0000000 |              |              |
| 2523: 14   | 5 9 1 13   | 5 8 0     | 1328.9631500 | 1328.9630566 |
| 0.0000934  | -0.0003000 | 0.0000000 |              |              |
| 2524: 15   | 5 10 1 14  | 5 9 0     | 1329.2232500 | 1329.2231903 |
| 0.0000597  | -0.0003000 | 0.0000000 |              |              |
| 2525: 16   | 5 11 1 15  | 5 10 0    | 1329.4834600 | 1329.4832183 |
| 0.0002417  | -0.0003000 | 0.0000000 |              |              |
| 2526: 17   | 5 12 1 16  | 5 11 0    | 1329.7430800 | 1329.7431434 |
| -0.0000634 | -0.0003000 | 0.0000000 |              |              |
| 2527: 18   | 5 13 1 17  | 5 12 0    | 1330.0030400 | 1330.0029687 |
| 0.0000713  | -0.0003000 | 0.0000000 |              |              |
| 2528: 19   | 5 14 1 18  | 5 13 0    | 1330.2627900 | 1330.2626975 |
| 0.0000925  | -0.0003000 | 0.0000000 |              |              |
| 2529: 20   | 5 15 1 19  | 5 14 0    | 1330.5225100 | 1330.5223331 |
| 0.0001769  | -0.0003000 | 0.0000000 |              |              |
| 2530: 21   | 5 16 1 20  | 5 15 0    | 1330.7818400 | 1330.7818789 |
| -0.0000389 | -0.0003000 | 0.0000000 |              |              |
| 2531: 22   | 5 17 1 21  | 5 16 0    | 1331.0416600 | 1331.0413385 |
| 0.0003215  | -0.0003000 | 0.0000000 |              |              |
| 2532: 30   | 5 25 1 29  | 5 24 0    | 1333.1141500 | 1333.1144481 |
| -0.0002981 | -0.0003000 | 0.0000000 |              |              |

|                                 |              |              |
|---------------------------------|--------------|--------------|
| 2533: 31 5 26 1 30 5 25 0       | 1333.3732600 | 1333.3733497 |
| -0.0000897 -0.0003000 0.0000000 |              |              |
| 2534: 32 5 27 1 31 5 26 0       | 1333.6315000 | 1333.6322227 |
| -0.0007227 -0.0003000 0.0000000 |              |              |
| 2535: 40 5 35 1 39 5 34 0       | 1335.7036600 | 1335.7036180 |
| 0.0000420 -0.0003000 0.0000000  |              |              |
| 2536: 41 5 36 1 40 5 35 0       | 1335.9629300 | 1335.9628411 |
| 0.0000889 -0.0003000 0.0000000  |              |              |
| 2537: 42 5 37 1 41 5 36 0       | 1336.2222200 | 1336.2222047 |
| 0.0000153 -0.0003000 0.0000000  |              |              |
| 2538: 43 5 38 1 42 5 37 0       | 1336.4817900 | 1336.4817379 |
| 0.0000521 -0.0003000 0.0000000  |              |              |
| 2539: 44 5 39 1 43 5 38 0       | 1336.7414800 | 1336.7414725 |
| 0.0000075 -0.0003000 0.0000000  |              |              |
| 2540: 45 5 40 1 44 5 39 0       | 1337.0012900 | 1337.0014435 |
| -0.0001535 -0.0003000 0.0000000 |              |              |
| 2541: 46 5 41 1 45 5 40 0       | 1337.2617700 | 1337.2616886 |
| 0.0000814 -0.0003000 0.0000000  |              |              |
| 2542: 47 5 42 1 46 5 41 0       | 1337.5223400 | 1337.5222483 |
| 0.0000917 -0.0003000 0.0000000  |              |              |
| 2543: 48 5 43 1 47 5 42 0       | 1337.7830500 | 1337.7831655 |
| -0.0001155 -0.0003000 0.0000000 |              |              |
| 2544: 49 5 44 1 48 5 43 0       | 1338.0443300 | 1338.0444854 |
| -0.0001554 -0.0003000 0.0000000 |              |              |
| 2545: 50 5 45 1 49 5 44 0       | 1338.3061700 | 1338.3062545 |
| -0.0000845 -0.0003000 0.0000000 |              |              |
| 2546: 51 5 46 1 50 5 45 0       | 1338.5682300 | 1338.5685201 |
| -0.0002901 -0.0003000 0.0000000 |              |              |
| 2547: 52 5 47 1 51 5 46 0       | 1338.8316700 | 1338.8313289 |
| 0.0003411 -0.0003000 0.0000000  |              |              |
| 2548: 53 5 48 1 52 5 47 0       | 1339.0947200 | 1339.0947262 |
| -0.0000062 -0.0003000 0.0000000 |              |              |
| 2549: 54 5 49 1 53 5 48 0       | 1339.3584400 | 1339.3587534 |
| -0.0003134 -0.0003000 0.0000000 |              |              |
| 2550: 55 5 50 1 54 5 49 0       | 1339.6231800 | 1339.6234468 |
| -0.0002668 -0.0003000 0.0000000 |              |              |
| 2551: 56 5 51 1 55 5 50 0       | 1339.8887100 | 1339.8888351 |
| -0.0001251 -0.0003000 0.0000000 |              |              |
| 2552: 59 5 54 1 58 5 53 0       | 1340.6891600 | 1340.6892875 |
| -0.0001275 -0.0003000 0.0000000 |              |              |
| 2553: 60 5 55 1 59 5 54 0       | 1340.9573700 | 1340.9575004 |
| -0.0001304 -0.0003000 0.0000000 |              |              |
| 2554: 61 5 56 1 60 5 55 0       | 1341.2265300 | 1341.2263491 |
| 0.0001809 -0.0003000 0.0000000  |              |              |
| 2555: 62 5 57 1 61 5 56 0       | 1341.4949400 | 1341.4957655 |
| -0.0008255 -0.0003000 0.0000000 |              |              |
| 2556: 63 5 58 1 62 5 57 0       | 1341.7654300 | 1341.7656597 |
| -0.0002297 -0.0003000 0.0000000 |              |              |
| 2557: 64 5 59 1 63 5 58 0       | 1342.0359200 | 1342.0359197 |
| 0.0000003 -0.0003000 0.0000000  |              |              |
| 2558: 65 5 60 1 64 5 59 0       | 1342.3063900 | 1342.3064130 |
| -0.0000230 -0.0003000 0.0000000 |              |              |
| 2559: 66 5 61 1 65 5 60 0       | 1342.5769000 | 1342.5769886 |
| -0.0000886 -0.0003000 0.0000000 |              |              |
| 2560: 67 5 62 1 66 5 61 0       | 1342.8473500 | 1342.8474799 |
| -0.0001299 -0.0003000 0.0000000 |              |              |
| 2561: 68 5 63 1 67 5 62 0       | 1343.1173100 | 1343.1177086 |
| -0.0003986 -0.0003000 0.0000000 |              |              |
| 2562: 70 5 65 1 69 5 64 0       | 1343.6567100 | 1343.6566322 |
| 0.0000778 -0.0003000 0.0000000  |              |              |
| 2563: 71 5 66 1 70 5 65 0       | 1343.9247200 | 1343.9249506 |
| -0.0002306 -0.0003000 0.0000000 |              |              |
| 2564: 72 5 67 1 71 5 66 0       | 1344.1920300 | 1344.1922614 |
| -0.0002314 -0.0003000 0.0000000 |              |              |
| 2565: 73 5 68 1 72 5 67 0       | 1344.4587000 | 1344.4583901 |

|            |            |           |              |              |
|------------|------------|-----------|--------------|--------------|
| 0.0003099  | -0.0003000 | 0.0000000 |              |              |
| 2566: 74   | 5 69 1 73  | 5 68 0    | 1344.7238100 | 1344.7231725 |
| 0.0006375  | -0.0003000 | 0.0000000 |              |              |
| 2567: 75   | 5 70 1 74  | 5 69 0    | 1344.9864500 | 1344.9864565 |
| -0.0000065 | -0.0003000 | 0.0000000 |              |              |
| 2568: 76   | 5 71 1 75  | 5 70 0    | 1345.2478100 | 1345.2481029 |
| -0.0002929 | -0.0003000 | 0.0000000 |              |              |
| 2569: 77   | 5 72 1 76  | 5 71 0    | 1345.5073700 | 1345.5079853 |
| -0.0006153 | -0.0003000 | 0.0000000 |              |              |
| 2570: 78   | 5 73 1 77  | 5 72 0    | 1345.7658000 | 1345.7659897 |
| -0.0001897 | -0.0003000 | 0.0000000 |              |              |
| 2571: 79   | 5 74 1 78  | 5 73 0    | 1346.0218400 | 1346.0220140 |
| -0.0001740 | -0.0003000 | 0.0000000 |              |              |
| 2572: 80   | 5 75 1 79  | 5 74 0    | 1346.2758400 | 1346.2759665 |
| -0.0001265 | -0.0003000 | 0.0000000 |              |              |
| 2573: 81   | 5 76 1 80  | 5 75 0    | 1346.5279200 | 1346.5277653 |
| 0.0001547  | -0.0003000 | 0.0000000 |              |              |
| 2574: 82   | 5 77 1 81  | 5 76 0    | 1346.7772200 | 1346.7773373 |
| -0.0001173 | -0.0003000 | 0.0000000 |              |              |
| 2575: 83   | 5 78 1 82  | 5 77 0    | 1347.0246300 | 1347.0246171 |
| 0.0000129  | -0.0003000 | 0.0000000 |              |              |
| 2576: 84   | 5 79 1 83  | 5 78 0    | 1347.2693500 | 1347.2695472 |
| -0.0001972 | -0.0003000 | 0.0000000 |              |              |
| 2577: 85   | 5 80 1 84  | 5 79 0    | 1347.5121900 | 1347.5120776 |
| 0.0001124  | -0.0003000 | 0.0000000 |              |              |
| 2578: 86   | 5 81 1 85  | 5 80 0    | 1347.7514800 | 1347.7521661 |
| -0.0006861 | -0.0003000 | 0.0000000 |              |              |
| 2579: 87   | 5 82 1 86  | 5 81 0    | 1347.9897400 | 1347.9897792 |
| -0.0000392 | -0.0003000 | 0.0000000 |              |              |
| 2580: 88   | 5 83 1 87  | 5 82 0    | 1348.2244700 | 1348.2248929 |
| -0.0004229 | -0.0003000 | 0.0000000 |              |              |
| 2581: 89   | 5 84 1 88  | 5 83 0    | 1348.4572900 | 1348.4574941 |
| -0.0002041 | -0.0003000 | 0.0000000 |              |              |
| 2582: 90   | 5 85 1 89  | 5 84 0    | 1348.6873700 | 1348.6875824 |
| -0.0002124 | -0.0003000 | 0.0000000 |              |              |
| 2583: 85   | 5 81 1 86  | 5 82 0    | 1302.4075600 | 1302.4074278 |
| 0.0001322  | -0.0003000 | 0.0000000 |              |              |
| 2584: 84   | 5 80 1 85  | 5 81 0    | 1302.6728700 | 1302.6722910 |
| 0.0005790  | -0.0003000 | 0.0000000 |              |              |
| 2585: 83   | 5 79 1 84  | 5 80 0    | 1302.9371300 | 1302.9372406 |
| -0.0001106 | -0.0003000 | 0.0000000 |              |              |
| 2586: 82   | 5 78 1 83  | 5 79 0    | 1303.2027100 | 1303.2022846 |
| 0.0004254  | -0.0003000 | 0.0000000 |              |              |
| 2587: 81   | 5 77 1 82  | 5 78 0    | 1303.4668600 | 1303.4674310 |
| -0.0005710 | -0.0003000 | 0.0000000 |              |              |
| 2588: 80   | 5 76 1 81  | 5 77 0    | 1303.7318300 | 1303.7326873 |
| -0.0008573 | -0.0003000 | 0.0000000 |              |              |
| 2589: 79   | 5 75 1 80  | 5 76 0    | 1303.9984100 | 1303.9980610 |
| 0.0003490  | -0.0003000 | 0.0000000 |              |              |
| 2590: 78   | 5 74 1 79  | 5 75 0    | 1304.2638800 | 1304.2635588 |
| 0.0003212  | -0.0003000 | 0.0000000 |              |              |
| 2591: 77   | 5 73 1 78  | 5 74 0    | 1304.5287500 | 1304.5291874 |
| -0.0004374 | -0.0003000 | 0.0000000 |              |              |
| 2592: 76   | 5 72 1 77  | 5 73 0    | 1304.7954000 | 1304.7949526 |
| 0.0004474  | -0.0003000 | 0.0000000 |              |              |
| 2593: 75   | 5 71 1 76  | 5 72 0    | 1305.0608900 | 1305.0608598 |
| 0.0000302  | -0.0003000 | 0.0000000 |              |              |
| 2594: 73   | 5 69 1 74  | 5 70 0    | 1305.5931200 | 1305.5931187 |
| 0.0000013  | -0.0003000 | 0.0000000 |              |              |
| 2595: 72   | 5 68 1 73  | 5 69 0    | 1305.8594400 | 1305.8594775 |
| -0.0000375 | -0.0003000 | 0.0000000 |              |              |
| 2596: 71   | 5 67 1 72  | 5 68 0    | 1306.1260700 | 1306.1259927 |
| 0.0000773  | -0.0003000 | 0.0000000 |              |              |
| 2597: 70   | 5 66 1 71  | 5 67 0    | 1306.3927300 | 1306.3926659 |
| 0.0000641  | -0.0003000 | 0.0000000 |              |              |

|            |                      |              |              |
|------------|----------------------|--------------|--------------|
| 2598: 69   | 5 65 1 70 5 66 0     | 1306.6598600 | 1306.6594978 |
| 0.0003622  | -0.0003000 0.0000000 |              |              |
| 2599: 68   | 5 64 1 69 5 65 0     | 1306.9265600 | 1306.9264879 |
| 0.0000721  | -0.0003000 0.0000000 |              |              |
| 2600: 67   | 5 63 1 68 5 64 0     | 1307.1938200 | 1307.1936352 |
| 0.0001848  | -0.0003000 0.0000000 |              |              |
| 2601: 66   | 5 62 1 67 5 63 0     | 1307.4611500 | 1307.4609372 |
| 0.0002128  | -0.0003000 0.0000000 |              |              |
| 2602: 65   | 5 61 1 66 5 62 0     | 1307.7284700 | 1307.7283909 |
| 0.0000791  | -0.0003000 0.0000000 |              |              |
| 2603: 64   | 5 60 1 65 5 61 0     | 1307.9960700 | 1307.9959919 |
| 0.0000781  | -0.0003000 0.0000000 |              |              |
| 2604: 63   | 5 59 1 64 5 60 0     | 1308.2636600 | 1308.2637350 |
| -0.0000750 | -0.0003000 0.0000000 |              |              |
| 2605: 62   | 5 58 1 63 5 59 0     | 1308.5316500 | 1308.5316142 |
| 0.0000358  | -0.0003000 0.0000000 |              |              |
| 2606: 61   | 5 57 1 62 5 58 0     | 1308.7994900 | 1308.7996224 |
| -0.0001324 | -0.0003000 0.0000000 |              |              |
| 2607: 60   | 5 56 1 61 5 57 0     | 1309.0677600 | 1309.0677515 |
| 0.0000085  | -0.0003000 0.0000000 |              |              |
| 2608: 59   | 5 55 1 60 5 56 0     | 1309.3358800 | 1309.3359927 |
| -0.0001127 | -0.0003000 0.0000000 |              |              |
| 2609: 58   | 5 54 1 59 5 55 0     | 1309.6045300 | 1309.6043366 |
| 0.0001934  | -0.0003000 0.0000000 |              |              |
| 2610: 57   | 5 53 1 58 5 54 0     | 1309.8727900 | 1309.8727728 |
| 0.0000172  | -0.0003000 0.0000000 |              |              |
| 2611: 56   | 5 52 1 57 5 53 0     | 1310.1414700 | 1310.1412905 |
| 0.0001795  | -0.0003000 0.0000000 |              |              |
| 2612: 55   | 5 51 1 56 5 52 0     | 1310.4100700 | 1310.4098782 |
| 0.0001918  | -0.0003000 0.0000000 |              |              |
| 2613: 54   | 5 50 1 55 5 51 0     | 1310.6786200 | 1310.6785242 |
| 0.0000958  | -0.0003000 0.0000000 |              |              |
| 2614: 53   | 5 49 1 54 5 50 0     | 1310.9473000 | 1310.9472162 |
| 0.0000838  | -0.0003000 0.0000000 |              |              |
| 2615: 52   | 5 48 1 53 5 49 0     | 1311.2160500 | 1311.2159419 |
| 0.0001081  | -0.0003000 0.0000000 |              |              |
| 2616: 51   | 5 47 1 52 5 48 0     | 1311.4847800 | 1311.4846887 |
| 0.0000913  | -0.0003000 0.0000000 |              |              |
| 2617: 50   | 5 46 1 51 5 47 0     | 1311.7532600 | 1311.7534441 |
| -0.0001841 | -0.0003000 0.0000000 |              |              |
| 2618: 49   | 5 45 1 50 5 46 0     | 1312.0222700 | 1312.0221956 |
| 0.0000744  | -0.0003000 0.0000000 |              |              |
| 2619: 48   | 5 44 1 49 5 45 0     | 1312.2908200 | 1312.2909310 |
| -0.0001110 | -0.0003000 0.0000000 |              |              |
| 2620: 47   | 5 43 1 48 5 44 0     | 1312.5597100 | 1312.5596381 |
| 0.0000719  | -0.0003000 0.0000000 |              |              |
| 2621: 46   | 5 42 1 47 5 43 0     | 1312.8284300 | 1312.8283054 |
| 0.0001246  | -0.0003000 0.0000000 |              |              |
| 2622: 45   | 5 41 1 46 5 42 0     | 1313.0968100 | 1313.0969215 |
| -0.0001115 | -0.0003000 0.0000000 |              |              |
| 2623: 44   | 5 40 1 45 5 41 0     | 1313.3656000 | 1313.3654756 |
| 0.0001244  | -0.0003000 0.0000000 |              |              |
| 2624: 43   | 5 39 1 44 5 40 0     | 1313.6339800 | 1313.6339574 |
| 0.0000226  | -0.0003000 0.0000000 |              |              |
| 2625: 42   | 5 38 1 43 5 39 0     | 1313.9021200 | 1313.9023574 |
| -0.0002374 | -0.0003000 0.0000000 |              |              |
| 2626: 41   | 5 37 1 42 5 38 0     | 1314.1703500 | 1314.1706663 |
| -0.0003163 | -0.0003000 0.0000000 |              |              |
| 2627: 40   | 5 36 1 41 5 37 0     | 1314.4389100 | 1314.4388757 |
| 0.0000343  | -0.0003000 0.0000000 |              |              |
| 2628: 33   | 5 29 1 34 5 30 0     | 1316.3127200 | 1316.3129772 |
| -0.0002572 | -0.0003000 0.0000000 |              |              |
| 2629: 32   | 5 28 1 33 5 29 0     | 1316.5798900 | 1316.5801607 |
| -0.0002707 | -0.0003000 0.0000000 |              |              |
| 2630: 31   | 5 27 1 32 5 28 0     | 1316.8472600 | 1316.8471957 |

|            |            |           |              |              |
|------------|------------|-----------|--------------|--------------|
| 0.0000643  | -0.0003000 | 0.0000000 |              |              |
| 2631: 30   | 5 26 1 31  | 5 27 0    | 1317.1136500 | 1317.1140795 |
| -0.0004295 | -0.0003000 | 0.0000000 |              |              |
| 2632: 29   | 5 25 1 30  | 5 26 0    | 1317.3807300 | 1317.3808097 |
| -0.0000797 | -0.0003000 | 0.0000000 |              |              |
| 2633: 28   | 5 24 1 29  | 5 25 0    | 1317.6473500 | 1317.6473841 |
| -0.0000341 | -0.0003000 | 0.0000000 |              |              |
| 2634: 27   | 5 23 1 28  | 5 24 0    | 1317.9138300 | 1317.9138011 |
| 0.0000289  | -0.0003000 | 0.0000000 |              |              |
| 2635: 26   | 5 22 1 27  | 5 23 0    | 1318.1799700 | 1318.1800593 |
| -0.0000893 | -0.0003000 | 0.0000000 |              |              |
| 2636: 25   | 5 21 1 26  | 5 22 0    | 1318.4460800 | 1318.4461574 |
| -0.0000774 | -0.0003000 | 0.0000000 |              |              |
| 2637: 24   | 5 20 1 25  | 5 21 0    | 1318.7121200 | 1318.7120946 |
| 0.0000254  | -0.0003000 | 0.0000000 |              |              |
| 2638: 23   | 5 19 1 24  | 5 20 0    | 1318.9778000 | 1318.9778702 |
| -0.0000702 | -0.0003000 | 0.0000000 |              |              |
| 2639: 22   | 5 18 1 23  | 5 19 0    | 1319.2434400 | 1319.2434836 |
| -0.0000436 | -0.0003000 | 0.0000000 |              |              |
| 2640: 21   | 5 17 1 22  | 5 18 0    | 1319.5088800 | 1319.5089347 |
| -0.0000547 | -0.0003000 | 0.0000000 |              |              |
| 2641: 20   | 5 16 1 21  | 5 17 0    | 1319.7742300 | 1319.7742232 |
| 0.0000068  | -0.0003000 | 0.0000000 |              |              |
| 2642: 19   | 5 15 1 20  | 5 16 0    | 1320.0393500 | 1320.0393490 |
| 0.0000010  | -0.0003000 | 0.0000000 |              |              |
| 2643: 18   | 5 14 1 19  | 5 15 0    | 1320.3043100 | 1320.3043124 |
| -0.0000024 | -0.0003000 | 0.0000000 |              |              |
| 2644: 11   | 5 7 1 12   | 5 8 0     | 1322.1543200 | 1322.1545384 |
| -0.0002184 | -0.0003000 | 0.0000000 |              |              |
| 2645: 10   | 5 6 1 11   | 5 7 0     | 1322.4181500 | 1322.4182185 |
| -0.0000685 | -0.0003000 | 0.0000000 |              |              |
| 2646: 9    | 5 5 1 10   | 5 6 0     | 1322.6818600 | 1322.6817416 |
| 0.0001184  | -0.0003000 | 0.0000000 |              |              |
| 2647: 8    | 5 4 1 9    | 5 5 0     | 1322.9450900 | 1322.9451088 |
| -0.0000188 | -0.0003000 | 0.0000000 |              |              |
| 2648: 7    | 5 3 1 8    | 5 4 0     | 1323.2081500 | 1323.2083212 |
| -0.0001712 | -0.0003000 | 0.0000000 |              |              |
| 2649: 6    | 5 2 1 7    | 5 3 0     | 1323.4713200 | 1323.4713799 |
| -0.0000599 | -0.0003000 | 0.0000000 |              |              |
| 2650: 5    | 5 1 1 6    | 5 2 0     | 1323.7341500 | 1323.7342863 |
| -0.0001363 | -0.0003000 | 0.0000000 |              |              |
| 2651: 6    | 5 2 1 5    | 5 1 0     | 1326.8779700 | 1326.8778507 |
| 0.0001193  | -0.0003000 | 0.0000000 |              |              |
| 2652: 7    | 5 3 1 6    | 5 2 0     | 1327.1390300 | 1327.1389275 |
| 0.0001025  | -0.0003000 | 0.0000000 |              |              |
| 2653: 8    | 5 4 1 7    | 5 3 0     | 1327.3998000 | 1327.3998776 |
| -0.0000776 | -0.0003000 | 0.0000000 |              |              |
| 2654: 9    | 5 5 1 8    | 5 4 0     | 1327.6604700 | 1327.6607036 |
| -0.0002336 | -0.0003000 | 0.0000000 |              |              |
| 2655: 10   | 5 6 1 9    | 5 5 0     | 1327.9212900 | 1327.9214076 |
| -0.0001176 | -0.0003000 | 0.0000000 |              |              |
| 2656: 11   | 5 7 1 10   | 5 6 0     | 1328.1818900 | 1328.1819924 |
| -0.0001024 | -0.0003000 | 0.0000000 |              |              |
| 2657: 12   | 5 8 1 11   | 5 7 0     | 1328.4424800 | 1328.4424603 |
| 0.0000197  | -0.0003000 | 0.0000000 |              |              |
| 2658: 13   | 5 9 1 12   | 5 8 0     | 1328.7028700 | 1328.7028140 |
| 0.0000560  | -0.0003000 | 0.0000000 |              |              |
| 2659: 14   | 5 10 1 13  | 5 9 0     | 1328.9631500 | 1328.9630563 |
| 0.0000937  | -0.0003000 | 0.0000000 |              |              |
| 2660: 15   | 5 11 1 14  | 5 10 0    | 1329.2232500 | 1329.2231897 |
| 0.0000603  | -0.0003000 | 0.0000000 |              |              |
| 2661: 16   | 5 12 1 15  | 5 11 0    | 1329.4834600 | 1329.4832171 |
| 0.0002429  | -0.0003000 | 0.0000000 |              |              |
| 2662: 17   | 5 13 1 16  | 5 12 0    | 1329.7430800 | 1329.7431414 |
| -0.0000614 | -0.0003000 | 0.0000000 |              |              |

|            |                      |              |              |
|------------|----------------------|--------------|--------------|
| 2663: 18   | 5 14 1 17 5 13 0     | 1330.0030400 | 1330.0029654 |
| 0.0000746  | -0.0003000 0.0000000 |              |              |
| 2664: 19   | 5 15 1 18 5 14 0     | 1330.2627900 | 1330.2626921 |
| 0.0000979  | -0.0003000 0.0000000 |              |              |
| 2665: 20   | 5 16 1 19 5 15 0     | 1330.5225100 | 1330.5223243 |
| 0.0001857  | -0.0003000 0.0000000 |              |              |
| 2666: 21   | 5 17 1 20 5 16 0     | 1330.7818400 | 1330.7818651 |
| -0.0000251 | -0.0003000 0.0000000 |              |              |
| 2667: 22   | 5 18 1 21 5 17 0     | 1331.0416600 | 1331.0413174 |
| 0.0003426  | -0.0003000 0.0000000 |              |              |
| 2668: 30   | 5 26 1 29 5 25 0     | 1333.1141500 | 1333.1140876 |
| 0.0000624  | -0.0003000 0.0000000 |              |              |
| 2669: 31   | 5 27 1 30 5 26 0     | 1333.3732600 | 1333.3728641 |
| 0.0003959  | -0.0003000 0.0000000 |              |              |
| 2670: 32   | 5 28 1 31 5 27 0     | 1333.6315000 | 1333.6315752 |
| -0.0000752 | -0.0003000 0.0000000 |              |              |
| 2671: 41   | 5 37 1 40 5 36 0     | 1335.9569400 | 1335.9568759 |
| 0.0000641  | -0.0003000 0.0000000 |              |              |
| 2672: 42   | 5 38 1 41 5 37 0     | 1336.2148000 | 1336.2148291 |
| -0.0000291 | -0.0003000 0.0000000 |              |              |
| 2673: 43   | 5 39 1 42 5 38 0     | 1336.4726700 | 1336.4726723 |
| -0.0000023 | -0.0003000 0.0000000 |              |              |
| 2674: 44   | 5 40 1 43 5 39 0     | 1336.7302700 | 1336.7303935 |
| -0.0001235 | -0.0003000 0.0000000 |              |              |
| 2675: 45   | 5 41 1 44 5 40 0     | 1336.9880300 | 1336.9879792 |
| 0.0000508  | -0.0003000 0.0000000 |              |              |
| 2676: 46   | 5 42 1 45 5 41 0     | 1337.2456100 | 1337.2454138 |
| 0.0001962  | -0.0003000 0.0000000 |              |              |
| 2677: 47   | 5 43 1 46 5 42 0     | 1337.5024500 | 1337.5026801 |
| -0.0002301 | -0.0003000 0.0000000 |              |              |
| 2678: 48   | 5 44 1 47 5 43 0     | 1337.7596200 | 1337.7597590 |
| -0.0001390 | -0.0003000 0.0000000 |              |              |
| 2679: 49   | 5 45 1 48 5 44 0     | 1338.0165600 | 1338.0166294 |
| -0.0000694 | -0.0003000 0.0000000 |              |              |
| 2680: 50   | 5 46 1 49 5 45 0     | 1338.2735400 | 1338.2732687 |
| 0.0002713  | -0.0003000 0.0000000 |              |              |
| 2681: 51   | 5 47 1 50 5 46 0     | 1338.5294800 | 1338.5296524 |
| -0.0001724 | -0.0003000 0.0000000 |              |              |
| 2682: 52   | 5 48 1 51 5 47 0     | 1338.7857100 | 1338.7857541 |
| -0.0000441 | -0.0003000 0.0000000 |              |              |
| 2683: 53   | 5 49 1 52 5 48 0     | 1339.0413300 | 1339.0415462 |
| -0.0002162 | -0.0003000 0.0000000 |              |              |
| 2684: 54   | 5 50 1 53 5 49 0     | 1339.2969600 | 1339.2969994 |
| -0.0000394 | -0.0003000 0.0000000 |              |              |
| 2685: 55   | 5 51 1 54 5 50 0     | 1339.5521000 | 1339.5520833 |
| 0.0000167  | -0.0003000 0.0000000 |              |              |
| 2686: 56   | 5 52 1 55 5 51 0     | 1339.8067000 | 1339.8067663 |
| -0.0000663 | -0.0003000 0.0000000 |              |              |
| 2687: 57   | 5 53 1 56 5 52 0     | 1340.0609500 | 1340.0610159 |
| -0.0000659 | -0.0003000 0.0000000 |              |              |
| 2688: 58   | 5 54 1 57 5 53 0     | 1340.3148100 | 1340.3147990 |
| 0.0000110  | -0.0003000 0.0000000 |              |              |
| 2689: 59   | 5 55 1 58 5 54 0     | 1340.5680500 | 1340.5680818 |
| -0.0000318 | -0.0003000 0.0000000 |              |              |
| 2690: 60   | 5 56 1 59 5 55 0     | 1340.8207000 | 1340.8208304 |
| -0.0001304 | -0.0003000 0.0000000 |              |              |
| 2691: 61   | 5 57 1 60 5 56 0     | 1341.0727200 | 1341.0730110 |
| -0.0002910 | -0.0003000 0.0000000 |              |              |
| 2692: 62   | 5 58 1 61 5 57 0     | 1341.3244900 | 1341.3245899 |
| -0.0000999 | -0.0003000 0.0000000 |              |              |
| 2693: 63   | 5 59 1 62 5 58 0     | 1341.5754700 | 1341.5755338 |
| -0.0000638 | -0.0003000 0.0000000 |              |              |
| 2694: 64   | 5 60 1 63 5 59 0     | 1341.8261400 | 1341.8258103 |
| 0.0003297  | -0.0003000 0.0000000 |              |              |
| 2695: 65   | 5 61 1 64 5 60 0     | 1342.0752400 | 1342.0753878 |

|            |            |           |              |              |
|------------|------------|-----------|--------------|--------------|
| -0.0001478 | -0.0003000 | 0.0000000 |              |              |
| 2696: 66   | 5 62       | 1 65      | 5 61         | 0            |
| 0.0000042  | -0.0003000 | 0.0000000 | 1342.3242400 | 1342.3242358 |
| 2697: 69   | 5 65       | 1 68      | 5 64         | 0            |
| -0.0001889 | -0.0003000 | 0.0000000 | 1343.0659300 | 1343.0661189 |
| 2698: 70   | 5 66       | 1 69      | 5 65         | 0            |
| 0.0000467  | -0.0003000 | 0.0000000 | 1343.3118200 | 1343.3117733 |
| 2699: 71   | 5 67       | 1 70      | 5 66         | 0            |
| -0.0001092 | -0.0003000 | 0.0000000 | 1343.5564600 | 1343.5565692 |
| 2700: 72   | 5 68       | 1 71      | 5 67         | 0            |
| -0.0000465 | -0.0003000 | 0.0000000 | 1343.8004400 | 1343.8004865 |
| 2701: 73   | 5 69       | 1 72      | 5 68         | 0            |
| -0.0003073 | -0.0003000 | 0.0000000 | 1344.0432000 | 1344.0435073 |
| 2702: 74   | 5 70       | 1 73      | 5 69         | 0            |
| -0.0000659 | -0.0003000 | 0.0000000 | 1344.2855500 | 1344.2856159 |
| 2703: 75   | 5 71       | 1 74      | 5 70         | 0            |
| -0.0003392 | -0.0003000 | 0.0000000 | 1344.5264600 | 1344.5267992 |
| 2704: 76   | 5 72       | 1 75      | 5 71         | 0            |
| -0.0002660 | -0.0003000 | 0.0000000 | 1344.7667800 | 1344.7670460 |
| 2705: 77   | 5 73       | 1 76      | 5 72         | 0            |
| 0.0000820  | -0.0003000 | 0.0000000 | 1345.0064300 | 1345.0063480 |
| 2706: 78   | 5 74       | 1 77      | 5 73         | 0            |
| -0.0002689 | -0.0003000 | 0.0000000 | 1345.2444300 | 1345.2446989 |
| 2707: 80   | 5 76       | 1 79      | 5 75         | 0            |
| 0.0000249  | -0.0003000 | 0.0000000 | 1345.7185600 | 1345.7185351 |
| 2708: 81   | 5 77       | 1 80      | 5 76         | 0            |
| -0.0001599 | -0.0003000 | 0.0000000 | 1345.9538600 | 1345.9540199 |
| 2709: 82   | 5 78       | 1 81      | 5 77         | 0            |
| -0.0001728 | -0.0003000 | 0.0000000 | 1346.1883800 | 1346.1885528 |
| 2710: 85   | 5 81       | 1 84      | 5 80         | 0            |
| -0.0007131 | -0.0003000 | 0.0000000 | 1346.8857900 | 1346.8865031 |
| 2711: 86   | 5 82       | 1 85      | 5 81         | 0            |
| 0.0000185  | -0.0003000 | 0.0000000 | 1347.1173200 | 1347.1173015 |
| 2712: 87   | 5 83       | 1 86      | 5 82         | 0            |
| 0.0005259  | -0.0003000 | 0.0000000 | 1347.3477200 | 1347.3471941 |
| 2713: 88   | 5 84       | 1 87      | 5 83         | 0            |
| -0.0000952 | -0.0003000 | 0.0000000 | 1347.5761000 | 1347.5761952 |
| 2714: 86   | 6 80       | 1 87      | 6 81         | 0            |
| -0.0003839 | -0.0003000 | 0.0000000 | 1301.8463800 | 1301.8467639 |
| 2715: 85   | 6 79       | 1 86      | 6 80         | 0            |
| -0.0001469 | -0.0003000 | 0.0000000 | 1302.1200000 | 1302.1201469 |
| 2716: 84   | 6 78       | 1 85      | 6 79         | 0            |
| -0.0007352 | -0.0003000 | 0.0000000 | 1302.3930700 | 1302.3938052 |
| 2717: 83   | 6 77       | 1 84      | 6 78         | 0            |
| -0.0009081 | -0.0003000 | 0.0000000 | 1302.6667900 | 1302.6676981 |
| 2718: 82   | 6 76       | 1 83      | 6 77         | 0            |
| -0.0007017 | -0.0003000 | 0.0000000 | 1302.9410800 | 1302.9417817 |
| 2719: 81   | 6 75       | 1 82      | 6 76         | 0            |
| -0.0000200 | -0.0003000 | 0.0000000 | 1303.2159900 | 1303.2160100 |
| 2720: 79   | 6 73       | 1 80      | 6 74         | 0            |
| -0.0001416 | -0.0003000 | 0.0000000 | 1303.7645700 | 1303.7647116 |
| 2721: 78   | 6 72       | 1 79      | 6 73         | 0            |
| -0.0003620 | -0.0003000 | 0.0000000 | 1304.0387300 | 1304.0390920 |
| 2722: 77   | 6 71       | 1 78      | 6 72         | 0            |
| 0.0001268  | -0.0003000 | 0.0000000 | 1304.3135600 | 1304.3134332 |
| 2723: 75   | 6 69       | 1 76      | 6 70         | 0            |
| 0.0002495  | -0.0003000 | 0.0000000 | 1304.8620900 | 1304.8618405 |
| 2724: 74   | 6 68       | 1 75      | 6 69         | 0            |
| 0.0000716  | -0.0003000 | 0.0000000 | 1305.1359100 | 1305.1358384 |
| 2725: 73   | 6 67       | 1 74      | 6 68         | 0            |
| -0.0000614 | -0.0003000 | 0.0000000 | 1305.4096000 | 1305.4096614 |
| 2726: 72   | 6 66       | 1 73      | 6 67         | 0            |
| 0.0000328  | -0.0003000 | 0.0000000 | 1305.6833200 | 1305.6832872 |
| 2727: 70   | 6 64       | 1 71      | 6 65         | 0            |
| 0.0004382  | -0.0003000 | 0.0000000 | 1306.2303200 | 1306.2298818 |

|            |            |           |      |   |              |              |
|------------|------------|-----------|------|---|--------------|--------------|
| 2728: 69   | 6 63       | 1 70      | 6 64 | 0 | 1306.5031800 | 1306.5028289 |
| 0.0003511  | -0.0003000 | 0.0000000 |      |   |              |              |
| 2729: 68   | 6 62       | 1 69      | 6 63 | 0 | 1306.7751600 | 1306.7755344 |
| -0.0003744 | -0.0003000 | 0.0000000 |      |   |              |              |
| 2730: 67   | 6 61       | 1 68      | 6 62 | 0 | 1307.0481400 | 1307.0479963 |
| 0.0001437  | -0.0003000 | 0.0000000 |      |   |              |              |
| 2731: 66   | 6 60       | 1 67      | 6 61 | 0 | 1307.3204000 | 1307.3202153 |
| 0.0001847  | -0.0003000 | 0.0000000 |      |   |              |              |
| 2732: 64   | 6 58       | 1 65      | 6 59 | 0 | 1307.8639900 | 1307.8639376 |
| 0.0000524  | -0.0003000 | 0.0000000 |      |   |              |              |
| 2733: 63   | 6 57       | 1 64      | 6 58 | 0 | 1308.1351700 | 1308.1354513 |
| -0.0002813 | -0.0003000 | 0.0000000 |      |   |              |              |
| 2734: 62   | 6 56       | 1 63      | 6 57 | 0 | 1308.4069900 | 1308.4067421 |
| 0.0002479  | -0.0003000 | 0.0000000 |      |   |              |              |
| 2735: 61   | 6 55       | 1 62      | 6 56 | 0 | 1308.6779400 | 1308.6778171 |
| 0.0001229  | -0.0003000 | 0.0000000 |      |   |              |              |
| 2736: 60   | 6 54       | 1 61      | 6 55 | 0 | 1308.9486800 | 1308.9486841 |
| -0.0000041 | -0.0003000 | 0.0000000 |      |   |              |              |
| 2737: 59   | 6 53       | 1 60      | 6 54 | 0 | 1309.2192700 | 1309.2193507 |
| -0.0000807 | -0.0003000 | 0.0000000 |      |   |              |              |
| 2738: 54   | 6 48       | 1 55      | 6 49 | 0 | 1310.5699700 | 1310.5699304 |
| 0.0000396  | -0.0003000 | 0.0000000 |      |   |              |              |
| 2739: 47   | 6 41       | 1 48      | 6 42 | 0 | 1312.4546300 | 1312.4540699 |
| 0.0005601  | -0.0003000 | 0.0000000 |      |   |              |              |
| 2740: 46   | 6 40       | 1 47      | 6 41 | 0 | 1312.7232800 | 1312.7226654 |
| 0.0006146  | -0.0003000 | 0.0000000 |      |   |              |              |
| 2741: 45   | 6 39       | 1 46      | 6 40 | 0 | 1312.9914000 | 1312.9911259 |
| 0.0002741  | -0.0003000 | 0.0000000 |      |   |              |              |
| 2742: 44   | 6 38       | 1 45      | 6 39 | 0 | 1313.2598700 | 1313.2594527 |
| 0.0004173  | -0.0003000 | 0.0000000 |      |   |              |              |
| 2743: 43   | 6 37       | 1 44      | 6 38 | 0 | 1313.5276200 | 1313.5276468 |
| -0.0000268 | -0.0003000 | 0.0000000 |      |   |              |              |
| 2744: 42   | 6 36       | 1 43      | 6 37 | 0 | 1313.7959500 | 1313.7957089 |
| 0.0002411  | -0.0003000 | 0.0000000 |      |   |              |              |
| 2745: 41   | 6 35       | 1 42      | 6 36 | 0 | 1314.0636900 | 1314.0636395 |
| 0.0000505  | -0.0003000 | 0.0000000 |      |   |              |              |
| 2746: 40   | 6 34       | 1 41      | 6 35 | 0 | 1314.3315500 | 1314.3314388 |
| 0.0001112  | -0.0003000 | 0.0000000 |      |   |              |              |
| 2747: 39   | 6 33       | 1 40      | 6 34 | 0 | 1314.5993100 | 1314.5991068 |
| 0.0002032  | -0.0003000 | 0.0000000 |      |   |              |              |
| 2748: 38   | 6 32       | 1 39      | 6 33 | 0 | 1314.8665600 | 1314.8666434 |
| -0.0000834 | -0.0003000 | 0.0000000 |      |   |              |              |
| 2749: 37   | 6 31       | 1 38      | 6 32 | 0 | 1315.1340900 | 1315.1340483 |
| 0.0000417  | -0.0003000 | 0.0000000 |      |   |              |              |
| 2750: 36   | 6 30       | 1 37      | 6 31 | 0 | 1315.4012600 | 1315.4013212 |
| -0.0000612 | -0.0003000 | 0.0000000 |      |   |              |              |
| 2751: 35   | 6 29       | 1 36      | 6 30 | 0 | 1315.6683600 | 1315.6684615 |
| -0.0001015 | -0.0003000 | 0.0000000 |      |   |              |              |
| 2752: 34   | 6 28       | 1 35      | 6 29 | 0 | 1315.9353600 | 1315.9354687 |
| -0.0001087 | -0.0003000 | 0.0000000 |      |   |              |              |
| 2753: 33   | 6 27       | 1 34      | 6 28 | 0 | 1316.2024000 | 1316.2023422 |
| 0.0000578  | -0.0003000 | 0.0000000 |      |   |              |              |
| 2754: 32   | 6 26       | 1 33      | 6 27 | 0 | 1316.4691600 | 1316.4690813 |
| 0.0000787  | -0.0003000 | 0.0000000 |      |   |              |              |
| 2755: 31   | 6 25       | 1 32      | 6 26 | 0 | 1316.7357800 | 1316.7356854 |
| 0.0000946  | -0.0003000 | 0.0000000 |      |   |              |              |
| 2756: 30   | 6 24       | 1 31      | 6 25 | 0 | 1317.0022400 | 1317.0021536 |
| 0.0000864  | -0.0003000 | 0.0000000 |      |   |              |              |
| 2757: 29   | 6 23       | 1 30      | 6 24 | 0 | 1317.2683700 | 1317.2684852 |
| -0.0001152 | -0.0003000 | 0.0000000 |      |   |              |              |
| 2758: 28   | 6 22       | 1 29      | 6 23 | 0 | 1317.5345400 | 1317.5346796 |
| -0.0001396 | -0.0003000 | 0.0000000 |      |   |              |              |
| 2759: 27   | 6 21       | 1 28      | 6 22 | 0 | 1317.8008400 | 1317.8007360 |
| 0.0001040  | -0.0003000 | 0.0000000 |      |   |              |              |
| 2760: 26   | 6 20       | 1 27      | 6 21 | 0 | 1318.0664700 | 1318.0666538 |

|            |            |           |              |              |
|------------|------------|-----------|--------------|--------------|
| -0.0001838 | -0.0003000 | 0.0000000 |              |              |
| 2761: 25   | 6 19 1 26  | 6 20 0    | 1318.3325500 | 1318.3324321 |
| 0.0001179  | -0.0003000 | 0.0000000 |              |              |
| 2762: 24   | 6 18 1 25  | 6 19 0    | 1318.5980500 | 1318.5980704 |
| -0.0000204 | -0.0003000 | 0.0000000 |              |              |
| 2763: 23   | 6 17 1 24  | 6 18 0    | 1318.8634400 | 1318.8635681 |
| -0.0001281 | -0.0003000 | 0.0000000 |              |              |
| 2764: 22   | 6 16 1 23  | 6 17 0    | 1319.1286800 | 1319.1289244 |
| -0.0002444 | -0.0003000 | 0.0000000 |              |              |
| 2765: 21   | 6 15 1 22  | 6 16 0    | 1319.3939300 | 1319.3941390 |
| -0.0002090 | -0.0003000 | 0.0000000 |              |              |
| 2766: 20   | 6 14 1 21  | 6 15 0    | 1319.6591100 | 1319.6592113 |
| -0.0001013 | -0.0003000 | 0.0000000 |              |              |
| 2767: 19   | 6 13 1 20  | 6 14 0    | 1319.9242000 | 1319.9241408 |
| 0.0000592  | -0.0003000 | 0.0000000 |              |              |
| 2768: 18   | 6 12 1 19  | 6 13 0    | 1320.1890400 | 1320.1889271 |
| 0.0001129  | -0.0003000 | 0.0000000 |              |              |
| 2769: 17   | 6 11 1 18  | 6 12 0    | 1320.4534400 | 1320.4535698 |
| -0.0001298 | -0.0003000 | 0.0000000 |              |              |
| 2770: 16   | 6 10 1 17  | 6 11 0    | 1320.7179900 | 1320.7180686 |
| -0.0000786 | -0.0003000 | 0.0000000 |              |              |
| 2771: 15   | 6 9 1 16   | 6 10 0    | 1320.9824900 | 1320.9824233 |
| 0.0000667  | -0.0003000 | 0.0000000 |              |              |
| 2772: 14   | 6 8 1 15   | 6 9 0     | 1321.2466000 | 1321.2466335 |
| -0.0000335 | -0.0003000 | 0.0000000 |              |              |
| 2773: 13   | 6 7 1 14   | 6 8 0     | 1321.5106500 | 1321.5106991 |
| -0.0000491 | -0.0003000 | 0.0000000 |              |              |
| 2774: 12   | 6 6 1 13   | 6 7 0     | 1321.7745800 | 1321.7746201 |
| -0.0000401 | -0.0003000 | 0.0000000 |              |              |
| 2775: 11   | 6 5 1 12   | 6 6 0     | 1322.0383600 | 1322.0383962 |
| -0.0000362 | -0.0003000 | 0.0000000 |              |              |
| 2776: 10   | 6 4 1 11   | 6 5 0     | 1322.3019200 | 1322.3020276 |
| -0.0001076 | -0.0003000 | 0.0000000 |              |              |
| 2777: 9    | 6 3 1 10   | 6 4 0     | 1322.5654600 | 1322.5655142 |
| -0.0000542 | -0.0003000 | 0.0000000 |              |              |
| 2778: 8    | 6 2 1 9    | 6 3 0     | 1322.8286900 | 1322.8288561 |
| -0.0001661 | -0.0003000 | 0.0000000 |              |              |
| 2779: 7    | 6 1 1 8    | 6 2 0     | 1323.0921700 | 1323.0920534 |
| 0.0001166  | -0.0003000 | 0.0000000 |              |              |
| 2780: 6    | 6 0 1 7    | 6 1 0     | 1323.3549700 | 1323.3551064 |
| -0.0001364 | -0.0003000 | 0.0000000 |              |              |
| 2781: 7    | 6 1 1 6    | 6 0 0     | 1327.0228000 | 1327.0229146 |
| -0.0001146 | -0.0003000 | 0.0000000 |              |              |
| 2782: 8    | 6 2 1 7    | 6 1 0     | 1327.2837400 | 1327.2838585 |
| -0.0001185 | -0.0003000 | 0.0000000 |              |              |
| 2783: 9    | 6 3 1 8    | 6 2 0     | 1327.5446700 | 1327.5446676 |
| 0.0000024  | -0.0003000 | 0.0000000 |              |              |
| 2784: 10   | 6 4 1 9    | 6 3 0     | 1327.8052900 | 1327.8053430 |
| -0.0000530 | -0.0003000 | 0.0000000 |              |              |
| 2785: 11   | 6 5 1 10   | 6 4 0     | 1328.0660700 | 1328.0658857 |
| 0.0001843  | -0.0003000 | 0.0000000 |              |              |
| 2786: 12   | 6 6 1 11   | 6 5 0     | 1328.3263000 | 1328.3262967 |
| 0.0000033  | -0.0003000 | 0.0000000 |              |              |
| 2787: 13   | 6 7 1 12   | 6 6 0     | 1328.5864800 | 1328.5865772 |
| -0.0000972 | -0.0003000 | 0.0000000 |              |              |
| 2788: 14   | 6 8 1 13   | 6 7 0     | 1328.8467800 | 1328.8467283 |
| 0.0000517  | -0.0003000 | 0.0000000 |              |              |
| 2789: 15   | 6 9 1 14   | 6 8 0     | 1329.1067900 | 1329.1067512 |
| 0.0000388  | -0.0003000 | 0.0000000 |              |              |
| 2790: 16   | 6 10 1 15  | 6 9 0     | 1329.3670500 | 1329.3666471 |
| 0.0004029  | -0.0003000 | 0.0000000 |              |              |
| 2791: 17   | 6 11 1 16  | 6 10 0    | 1329.6264000 | 1329.6264173 |
| -0.0000173 | -0.0003000 | 0.0000000 |              |              |
| 2792: 18   | 6 12 1 17  | 6 11 0    | 1329.8860800 | 1329.8860631 |
| 0.0000169  | -0.0003000 | 0.0000000 |              |              |

|            |                      |              |              |
|------------|----------------------|--------------|--------------|
| 2793: 19   | 6 13 1 18 6 12 0     | 1330.1457100 | 1330.1455859 |
| 0.0001241  | -0.0003000 0.0000000 |              |              |
| 2794: 20   | 6 14 1 19 6 13 0     | 1330.4051100 | 1330.4049869 |
| 0.0001231  | -0.0003000 0.0000000 |              |              |
| 2795: 21   | 6 15 1 20 6 14 0     | 1330.6643200 | 1330.6642678 |
| 0.0000522  | -0.0003000 0.0000000 |              |              |
| 2796: 22   | 6 16 1 21 6 15 0     | 1330.9235900 | 1330.9234299 |
| 0.0001601  | -0.0003000 0.0000000 |              |              |
| 2797: 23   | 6 17 1 22 6 16 0     | 1331.1825800 | 1331.1824747 |
| 0.0001053  | -0.0003000 0.0000000 |              |              |
| 2798: 24   | 6 18 1 23 6 17 0     | 1331.4414600 | 1331.4414040 |
| 0.0000560  | -0.0003000 0.0000000 |              |              |
| 2799: 25   | 6 19 1 24 6 18 0     | 1331.7003000 | 1331.7002192 |
| 0.0000808  | -0.0003000 0.0000000 |              |              |
| 2800: 26   | 6 20 1 25 6 19 0     | 1331.9588400 | 1331.9589221 |
| -0.0000821 | -0.0003000 0.0000000 |              |              |
| 2801: 27   | 6 21 1 26 6 20 0     | 1332.2176300 | 1332.2175144 |
| 0.0001156  | -0.0003000 0.0000000 |              |              |
| 2802: 28   | 6 22 1 27 6 21 0     | 1332.4759500 | 1332.4759980 |
| -0.0000480 | -0.0003000 0.0000000 |              |              |
| 2803: 29   | 6 23 1 28 6 22 0     | 1332.7343700 | 1332.7343749 |
| -0.0000049 | -0.0003000 0.0000000 |              |              |
| 2804: 30   | 6 24 1 29 6 23 0     | 1332.9925100 | 1332.9926469 |
| -0.0001369 | -0.0003000 0.0000000 |              |              |
| 2805: 31   | 6 25 1 30 6 24 0     | 1333.2508200 | 1333.2508162 |
| 0.0000038  | -0.0003000 0.0000000 |              |              |
| 2806: 32   | 6 26 1 31 6 25 0     | 1333.5090200 | 1333.5088850 |
| 0.0001350  | -0.0003000 0.0000000 |              |              |
| 2807: 33   | 6 27 1 32 6 26 0     | 1333.7667100 | 1333.7668557 |
| -0.0001457 | -0.0003000 0.0000000 |              |              |
| 2808: 34   | 6 28 1 33 6 27 0     | 1334.0245300 | 1334.0247309 |
| -0.0002009 | -0.0003000 0.0000000 |              |              |
| 2809: 36   | 6 30 1 35 6 29 0     | 1334.5399100 | 1334.5402054 |
| -0.0002954 | -0.0003000 0.0000000 |              |              |
| 2810: 37   | 6 31 1 36 6 30 0     | 1334.7978100 | 1334.7978109 |
| -0.0000009 | -0.0003000 0.0000000 |              |              |
| 2811: 38   | 6 32 1 37 6 31 0     | 1335.0551300 | 1335.0553330 |
| -0.0002030 | -0.0003000 0.0000000 |              |              |
| 2812: 39   | 6 33 1 38 6 32 0     | 1335.3127500 | 1335.3127755 |
| -0.0000255 | -0.0003000 0.0000000 |              |              |
| 2813: 40   | 6 34 1 39 6 33 0     | 1335.5697000 | 1335.5701425 |
| -0.0004425 | -0.0003000 0.0000000 |              |              |
| 2814: 41   | 6 35 1 40 6 34 0     | 1335.8273200 | 1335.8274386 |
| -0.0001186 | -0.0003000 0.0000000 |              |              |
| 2815: 42   | 6 36 1 41 6 35 0     | 1336.0842700 | 1336.0846689 |
| -0.0003989 | -0.0003000 0.0000000 |              |              |
| 2816: 43   | 6 37 1 42 6 36 0     | 1336.3415400 | 1336.3418390 |
| -0.0002990 | -0.0003000 0.0000000 |              |              |
| 2817: 44   | 6 38 1 43 6 37 0     | 1336.5988600 | 1336.5989553 |
| -0.0000953 | -0.0003000 0.0000000 |              |              |
| 2818: 45   | 6 39 1 44 6 38 0     | 1336.8554900 | 1336.8560246 |
| -0.0005346 | -0.0003000 0.0000000 |              |              |
| 2819: 52   | 6 46 1 51 6 45 0     | 1338.6552800 | 1338.6549997 |
| 0.0002803  | -0.0003000 0.0000000 |              |              |
| 2820: 53   | 6 47 1 52 6 46 0     | 1338.9119200 | 1338.9120762 |
| -0.0001562 | -0.0003000 0.0000000 |              |              |
| 2821: 54   | 6 48 1 53 6 47 0     | 1339.1691600 | 1339.1692230 |
| -0.0000630 | -0.0003000 0.0000000 |              |              |
| 2822: 55   | 6 49 1 54 6 48 0     | 1339.4265400 | 1339.4264618 |
| 0.0000782  | -0.0003000 0.0000000 |              |              |
| 2823: 56   | 6 50 1 55 6 49 0     | 1339.6837700 | 1339.6838167 |
| -0.0000467 | -0.0003000 0.0000000 |              |              |
| 2824: 57   | 6 51 1 56 6 50 0     | 1339.9413400 | 1339.9413142 |
| 0.0000258  | -0.0003000 0.0000000 |              |              |
| 2825: 58   | 6 52 1 57 6 51 0     | 1340.1989900 | 1340.1989833 |

|            |            |           |              |              |
|------------|------------|-----------|--------------|--------------|
| 0.0000067  | -0.0003000 | 0.0000000 |              |              |
| 2826: 59   | 6 53 1 58  | 6 52 0    | 1340.4566700 | 1340.4568557 |
| -0.0001857 | -0.0003000 | 0.0000000 |              |              |
| 2827: 61   | 6 55 1 60  | 6 54 0    | 1340.9731600 | 1340.9733508 |
| -0.0001908 | -0.0003000 | 0.0000000 |              |              |
| 2828: 62   | 6 56 1 61  | 6 55 0    | 1341.2321300 | 1341.2320503 |
| 0.0000797  | -0.0003000 | 0.0000000 |              |              |
| 2829: 63   | 6 57 1 62  | 6 56 0    | 1341.4918600 | 1341.4911061 |
| 0.0007539  | -0.0003000 | 0.0000000 |              |              |
| 2830: 65   | 6 59 1 64  | 6 58 0    | 1342.0104400 | 1342.0104639 |
| -0.0000239 | -0.0003000 | 0.0000000 |              |              |
| 2831: 66   | 6 60 1 65  | 6 59 0    | 1342.2708000 | 1342.2708574 |
| -0.0000574 | -0.0003000 | 0.0000000 |              |              |
| 2832: 67   | 6 61 1 66  | 6 60 0    | 1342.5316300 | 1342.5317885 |
| -0.0001585 | -0.0003000 | 0.0000000 |              |              |
| 2833: 68   | 6 62 1 67  | 6 61 0    | 1342.7932200 | 1342.7933018 |
| -0.0000818 | -0.0003000 | 0.0000000 |              |              |
| 2834: 69   | 6 63 1 68  | 6 62 0    | 1343.0552600 | 1343.0554390 |
| -0.0001790 | -0.0003000 | 0.0000000 |              |              |
| 2835: 70   | 6 64 1 69  | 6 63 0    | 1343.3181100 | 1343.3182377 |
| -0.0001277 | -0.0003000 | 0.0000000 |              |              |
| 2836: 71   | 6 65 1 70  | 6 64 0    | 1343.5813900 | 1343.5817288 |
| -0.0003388 | -0.0003000 | 0.0000000 |              |              |
| 2837: 72   | 6 66 1 71  | 6 65 0    | 1343.8449600 | 1343.8459349 |
| -0.0009749 | -0.0003000 | 0.0000000 |              |              |
| 2838: 73   | 6 67 1 72  | 6 66 0    | 1344.1106300 | 1344.1108677 |
| -0.0002377 | -0.0003000 | 0.0000000 |              |              |
| 2839: 74   | 6 68 1 73  | 6 67 0    | 1344.3762500 | 1344.3765258 |
| -0.0002758 | -0.0003000 | 0.0000000 |              |              |
| 2840: 75   | 6 69 1 74  | 6 68 0    | 1344.6427900 | 1344.6428923 |
| -0.0001023 | -0.0003000 | 0.0000000 |              |              |
| 2841: 76   | 6 70 1 75  | 6 69 0    | 1344.9100800 | 1344.9099324 |
| 0.0001476  | -0.0003000 | 0.0000000 |              |              |
| 2842: 78   | 6 72 1 77  | 6 71 0    | 1345.4458400 | 1345.4457952 |
| 0.0000448  | -0.0003000 | 0.0000000 |              |              |
| 2843: 80   | 6 74 1 79  | 6 73 0    | 1345.9831000 | 1345.9834258 |
| -0.0003258 | -0.0003000 | 0.0000000 |              |              |
| 2844: 81   | 6 75 1 80  | 6 74 0    | 1346.2525500 | 1346.2525961 |
| -0.0000461 | -0.0003000 | 0.0000000 |              |              |
| 2845: 82   | 6 76 1 81  | 6 75 0    | 1346.5213300 | 1346.5217996 |
| -0.0004696 | -0.0003000 | 0.0000000 |              |              |
| 2846: 83   | 6 77 1 82  | 6 76 0    | 1346.7914200 | 1346.7908633 |
| 0.0005567  | -0.0003000 | 0.0000000 |              |              |
| 2847: 84   | 6 78 1 83  | 6 77 0    | 1347.0599200 | 1347.0596019 |
| 0.0003181  | -0.0003000 | 0.0000000 |              |              |
| 2848: 85   | 6 79 1 84  | 6 78 0    | 1347.3276900 | 1347.3278217 |
| -0.0001317 | -0.0003000 | 0.0000000 |              |              |
| 2849: 86   | 6 80 1 85  | 6 79 0    | 1347.5954200 | 1347.5953245 |
| 0.0000955  | -0.0003000 | 0.0000000 |              |              |
| 2850: 87   | 6 81 1 86  | 6 80 0    | 1347.8615700 | 1347.8619123 |
| -0.0003423 | -0.0003000 | 0.0000000 |              |              |
| 2851: 88   | 6 82 1 87  | 6 81 0    | 1348.1271700 | 1348.1273904 |
| -0.0002204 | -0.0003000 | 0.0000000 |              |              |
| 2852: 89   | 6 83 1 88  | 6 82 0    | 1348.3912400 | 1348.3915716 |
| -0.0003316 | -0.0003000 | 0.0000000 |              |              |
| 2853: 90   | 6 84 1 89  | 6 83 0    | 1348.6541100 | 1348.6542782 |
| -0.0001682 | -0.0003000 | 0.0000000 |              |              |
| 2854: 91   | 6 85 1 90  | 6 84 0    | 1348.9161200 | 1348.9153443 |
| 0.0007757  | -0.0003000 | 0.0000000 |              |              |
| 2855: 89   | 6 84 1 90  | 6 85 0    | 1301.1723800 | 1301.1722237 |
| 0.0001563  | -0.0003000 | 0.0000000 |              |              |
| 2856: 88   | 6 83 1 89  | 6 84 0    | 1301.4391200 | 1301.4390723 |
| 0.0000477  | -0.0003000 | 0.0000000 |              |              |
| 2857: 86   | 6 81 1 87  | 6 82 0    | 1301.9734800 | 1301.9731765 |
| 0.0003035  | -0.0003000 | 0.0000000 |              |              |

|                                 |              |              |
|---------------------------------|--------------|--------------|
| 2858: 85 6 80 1 86 6 81 0       | 1302.2398300 | 1302.2404363 |
| -0.0006063 -0.0003000 0.0000000 |              |              |
| 2859: 84 6 79 1 85 6 80 0       | 1302.5074700 | 1302.5078364 |
| -0.0003664 -0.0003000 0.0000000 |              |              |
| 2860: 83 6 78 1 84 6 79 0       | 1302.7749700 | 1302.7753771 |
| -0.0004071 -0.0003000 0.0000000 |              |              |
| 2861: 81 6 76 1 82 6 77 0       | 1303.3112200 | 1303.3108783 |
| 0.0003417 -0.0003000 0.0000000  |              |              |
| 2862: 58 6 53 1 59 6 54 0       | 1309.4966400 | 1309.4966669 |
| -0.0000269 -0.0003000 0.0000000 |              |              |
| 2863: 57 6 52 1 58 6 53 0       | 1309.7659100 | 1309.7659307 |
| -0.0000207 -0.0003000 0.0000000 |              |              |
| 2864: 56 6 51 1 57 6 52 0       | 1310.0351200 | 1310.0351486 |
| -0.0000286 -0.0003000 0.0000000 |              |              |
| 2865: 55 6 50 1 56 6 51 0       | 1310.3043200 | 1310.3043132 |
| 0.0000068 -0.0003000 0.0000000  |              |              |
| 2866: 54 6 49 1 55 6 50 0       | 1310.5734500 | 1310.5734177 |
| 0.0000323 -0.0003000 0.0000000  |              |              |
| 2867: 47 6 42 1 48 6 43 0       | 1312.4546300 | 1312.4549691 |
| -0.0003391 -0.0003000 0.0000000 |              |              |
| 2868: 46 6 41 1 47 6 42 0       | 1312.7232800 | 1312.7233913 |
| -0.0001113 -0.0003000 0.0000000 |              |              |
| 2869: 45 6 40 1 46 6 41 0       | 1312.9914000 | 1312.9917087 |
| -0.0003087 -0.0003000 0.0000000 |              |              |
| 2870: 44 6 39 1 45 6 40 0       | 1313.2598700 | 1313.2599179 |
| -0.0000479 -0.0003000 0.0000000 |              |              |
| 2871: 43 6 38 1 44 6 39 0       | 1313.5276200 | 1313.5280159 |
| -0.0003959 -0.0003000 0.0000000 |              |              |
| 2872: 42 6 37 1 43 6 38 0       | 1313.7959500 | 1313.7960000 |
| -0.0000500 -0.0003000 0.0000000 |              |              |
| 2873: 41 6 36 1 42 6 37 0       | 1314.0636900 | 1314.0638675 |
| -0.0001775 -0.0003000 0.0000000 |              |              |
| 2874: 40 6 35 1 41 6 36 0       | 1314.3315500 | 1314.3316162 |
| -0.0000662 -0.0003000 0.0000000 |              |              |
| 2875: 39 6 34 1 40 6 35 0       | 1314.5993100 | 1314.5992438 |
| 0.0000662 -0.0003000 0.0000000  |              |              |
| 2876: 38 6 33 1 39 6 34 0       | 1314.8665600 | 1314.8667485 |
| -0.0001885 -0.0003000 0.0000000 |              |              |
| 2877: 37 6 32 1 38 6 33 0       | 1315.1340900 | 1315.1341283 |
| -0.0000383 -0.0003000 0.0000000 |              |              |
| 2878: 36 6 31 1 37 6 32 0       | 1315.4012600 | 1315.4013815 |
| -0.0001215 -0.0003000 0.0000000 |              |              |
| 2879: 35 6 30 1 36 6 31 0       | 1315.6683600 | 1315.6685066 |
| -0.0001466 -0.0003000 0.0000000 |              |              |
| 2880: 34 6 29 1 35 6 30 0       | 1315.9353600 | 1315.9355022 |
| -0.0001422 -0.0003000 0.0000000 |              |              |
| 2881: 33 6 28 1 34 6 29 0       | 1316.2024000 | 1316.2023668 |
| 0.0000332 -0.0003000 0.0000000  |              |              |
| 2882: 32 6 27 1 33 6 28 0       | 1316.4691600 | 1316.4690992 |
| 0.0000608 -0.0003000 0.0000000  |              |              |
| 2883: 31 6 26 1 32 6 27 0       | 1316.7357800 | 1316.7356982 |
| 0.0000818 -0.0003000 0.0000000  |              |              |
| 2884: 30 6 25 1 31 6 26 0       | 1317.0022400 | 1317.0021627 |
| 0.0000773 -0.0003000 0.0000000  |              |              |
| 2885: 29 6 24 1 30 6 25 0       | 1317.2683700 | 1317.2684917 |
| -0.0001217 -0.0003000 0.0000000 |              |              |
| 2886: 28 6 23 1 29 6 24 0       | 1317.5345400 | 1317.5346841 |
| -0.0001441 -0.0003000 0.0000000 |              |              |
| 2887: 27 6 22 1 28 6 23 0       | 1317.8008400 | 1317.8007391 |
| 0.0001009 -0.0003000 0.0000000  |              |              |
| 2888: 26 6 21 1 27 6 22 0       | 1318.0664700 | 1318.0666558 |
| -0.0001858 -0.0003000 0.0000000 |              |              |
| 2889: 25 6 20 1 26 6 21 0       | 1318.3325500 | 1318.3324335 |
| 0.0001165 -0.0003000 0.0000000  |              |              |
| 2890: 24 6 19 1 25 6 20 0       | 1318.5980500 | 1318.5980713 |

|            |            |           |              |              |
|------------|------------|-----------|--------------|--------------|
| -0.0000213 | -0.0003000 | 0.0000000 |              |              |
| 2891: 23   | 6 18 1 24  | 6 19 0    | 1318.8634400 | 1318.8635686 |
| -0.0001286 | -0.0003000 | 0.0000000 |              |              |
| 2892: 22   | 6 17 1 23  | 6 18 0    | 1319.1286800 | 1319.1289248 |
| -0.0002448 | -0.0003000 | 0.0000000 |              |              |
| 2893: 21   | 6 16 1 22  | 6 17 0    | 1319.3939300 | 1319.3941393 |
| -0.0002093 | -0.0003000 | 0.0000000 |              |              |
| 2894: 20   | 6 15 1 21  | 6 16 0    | 1319.6591100 | 1319.6592114 |
| -0.0001014 | -0.0003000 | 0.0000000 |              |              |
| 2895: 19   | 6 14 1 20  | 6 15 0    | 1319.9242000 | 1319.9241409 |
| 0.0000591  | -0.0003000 | 0.0000000 |              |              |
| 2896: 18   | 6 13 1 19  | 6 14 0    | 1320.1890400 | 1320.1889271 |
| 0.0001129  | -0.0003000 | 0.0000000 |              |              |
| 2897: 17   | 6 12 1 18  | 6 13 0    | 1320.4534400 | 1320.4535698 |
| -0.0001298 | -0.0003000 | 0.0000000 |              |              |
| 2898: 16   | 6 11 1 17  | 6 12 0    | 1320.7179900 | 1320.7180686 |
| -0.0000786 | -0.0003000 | 0.0000000 |              |              |
| 2899: 15   | 6 10 1 16  | 6 11 0    | 1320.9824900 | 1320.9824233 |
| 0.0000667  | -0.0003000 | 0.0000000 |              |              |
| 2900: 14   | 6 9 1 15   | 6 10 0    | 1321.2466000 | 1321.2466335 |
| -0.0000335 | -0.0003000 | 0.0000000 |              |              |
| 2901: 13   | 6 8 1 14   | 6 9 0     | 1321.5106500 | 1321.5106991 |
| -0.0000491 | -0.0003000 | 0.0000000 |              |              |
| 2902: 12   | 6 7 1 13   | 6 8 0     | 1321.7745800 | 1321.7746201 |
| -0.0000401 | -0.0003000 | 0.0000000 |              |              |
| 2903: 11   | 6 6 1 12   | 6 7 0     | 1322.0383600 | 1322.0383962 |
| -0.0000362 | -0.0003000 | 0.0000000 |              |              |
| 2904: 10   | 6 5 1 11   | 6 6 0     | 1322.3019200 | 1322.3020276 |
| -0.0001076 | -0.0003000 | 0.0000000 |              |              |
| 2905: 9    | 6 4 1 10   | 6 5 0     | 1322.5654600 | 1322.5655142 |
| -0.0000542 | -0.0003000 | 0.0000000 |              |              |
| 2906: 8    | 6 3 1 9    | 6 4 0     | 1322.8286900 | 1322.8288561 |
| -0.0001661 | -0.0003000 | 0.0000000 |              |              |
| 2907: 7    | 6 2 1 8    | 6 3 0     | 1323.0921700 | 1323.0920534 |
| 0.0001166  | -0.0003000 | 0.0000000 |              |              |
| 2908: 6    | 6 1 1 7    | 6 2 0     | 1323.3549700 | 1323.3551064 |
| -0.0001364 | -0.0003000 | 0.0000000 |              |              |
| 2909: 7    | 6 2 1 6    | 6 1 0     | 1327.0228000 | 1327.0229146 |
| -0.0001146 | -0.0003000 | 0.0000000 |              |              |
| 2910: 8    | 6 3 1 7    | 6 2 0     | 1327.2837400 | 1327.2838585 |
| -0.0001185 | -0.0003000 | 0.0000000 |              |              |
| 2911: 9    | 6 4 1 8    | 6 3 0     | 1327.5446700 | 1327.5446676 |
| 0.0000024  | -0.0003000 | 0.0000000 |              |              |
| 2912: 10   | 6 5 1 9    | 6 4 0     | 1327.8052900 | 1327.8053430 |
| -0.0000530 | -0.0003000 | 0.0000000 |              |              |
| 2913: 11   | 6 6 1 10   | 6 5 0     | 1328.0660700 | 1328.0658857 |
| 0.0001843  | -0.0003000 | 0.0000000 |              |              |
| 2914: 12   | 6 7 1 11   | 6 6 0     | 1328.3263000 | 1328.3262967 |
| 0.0000033  | -0.0003000 | 0.0000000 |              |              |
| 2915: 13   | 6 8 1 12   | 6 7 0     | 1328.5864800 | 1328.5865772 |
| -0.0000972 | -0.0003000 | 0.0000000 |              |              |
| 2916: 14   | 6 9 1 13   | 6 8 0     | 1328.8467800 | 1328.8467283 |
| 0.0000517  | -0.0003000 | 0.0000000 |              |              |
| 2917: 15   | 6 10 1 14  | 6 9 0     | 1329.1067900 | 1329.1067512 |
| 0.0000388  | -0.0003000 | 0.0000000 |              |              |
| 2918: 16   | 6 11 1 15  | 6 10 0    | 1329.3670500 | 1329.3666471 |
| 0.0004029  | -0.0003000 | 0.0000000 |              |              |
| 2919: 17   | 6 12 1 16  | 6 11 0    | 1329.6264000 | 1329.6264173 |
| -0.0000173 | -0.0003000 | 0.0000000 |              |              |
| 2920: 18   | 6 13 1 17  | 6 12 0    | 1329.8860800 | 1329.8860631 |
| 0.0000169  | -0.0003000 | 0.0000000 |              |              |
| 2921: 19   | 6 14 1 18  | 6 13 0    | 1330.1457100 | 1330.1455858 |
| 0.0001242  | -0.0003000 | 0.0000000 |              |              |
| 2922: 20   | 6 15 1 19  | 6 14 0    | 1330.4051100 | 1330.4049868 |
| 0.0001232  | -0.0003000 | 0.0000000 |              |              |

|            |            |           |    |   |    |   |    |   |              |              |
|------------|------------|-----------|----|---|----|---|----|---|--------------|--------------|
| 2923:      | 21         | 6         | 16 | 1 | 20 | 6 | 15 | 0 | 1330.6643200 | 1330.6642676 |
| 0.0000524  | -0.0003000 | 0.0000000 |    |   |    |   |    |   |              |              |
| 2924:      | 22         | 6         | 17 | 1 | 21 | 6 | 16 | 0 | 1330.9235900 | 1330.9234296 |
| 0.0001604  | -0.0003000 | 0.0000000 |    |   |    |   |    |   |              |              |
| 2925:      | 23         | 6         | 18 | 1 | 22 | 6 | 17 | 0 | 1331.1825800 | 1331.1824743 |
| 0.0001057  | -0.0003000 | 0.0000000 |    |   |    |   |    |   |              |              |
| 2926:      | 24         | 6         | 19 | 1 | 23 | 6 | 18 | 0 | 1331.4414600 | 1331.4414032 |
| 0.0000568  | -0.0003000 | 0.0000000 |    |   |    |   |    |   |              |              |
| 2927:      | 25         | 6         | 20 | 1 | 24 | 6 | 19 | 0 | 1331.7003000 | 1331.7002179 |
| 0.0000821  | -0.0003000 | 0.0000000 |    |   |    |   |    |   |              |              |
| 2928:      | 26         | 6         | 21 | 1 | 25 | 6 | 20 | 0 | 1331.9588400 | 1331.9589202 |
| -0.0000802 | -0.0003000 | 0.0000000 |    |   |    |   |    |   |              |              |
| 2929:      | 27         | 6         | 22 | 1 | 26 | 6 | 21 | 0 | 1332.2176300 | 1332.2175115 |
| 0.0001185  | -0.0003000 | 0.0000000 |    |   |    |   |    |   |              |              |
| 2930:      | 28         | 6         | 23 | 1 | 27 | 6 | 22 | 0 | 1332.4759500 | 1332.4759936 |
| -0.0000436 | -0.0003000 | 0.0000000 |    |   |    |   |    |   |              |              |
| 2931:      | 29         | 6         | 24 | 1 | 28 | 6 | 23 | 0 | 1332.7343700 | 1332.7343683 |
| 0.0000017  | -0.0003000 | 0.0000000 |    |   |    |   |    |   |              |              |
| 2932:      | 30         | 6         | 25 | 1 | 29 | 6 | 24 | 0 | 1332.9925100 | 1332.9926373 |
| -0.0001273 | -0.0003000 | 0.0000000 |    |   |    |   |    |   |              |              |
| 2933:      | 31         | 6         | 26 | 1 | 30 | 6 | 25 | 0 | 1333.2508200 | 1333.2508024 |
| 0.0000176  | -0.0003000 | 0.0000000 |    |   |    |   |    |   |              |              |
| 2934:      | 32         | 6         | 27 | 1 | 31 | 6 | 26 | 0 | 1333.5090200 | 1333.5088654 |
| 0.0001546  | -0.0003000 | 0.0000000 |    |   |    |   |    |   |              |              |
| 2935:      | 33         | 6         | 28 | 1 | 32 | 6 | 27 | 0 | 1333.7667100 | 1333.7668280 |
| -0.0001180 | -0.0003000 | 0.0000000 |    |   |    |   |    |   |              |              |
| 2936:      | 34         | 6         | 29 | 1 | 33 | 6 | 28 | 0 | 1334.0245300 | 1334.0246923 |
| -0.0001623 | -0.0003000 | 0.0000000 |    |   |    |   |    |   |              |              |
| 2937:      | 36         | 6         | 31 | 1 | 35 | 6 | 30 | 0 | 1334.5399100 | 1334.5401326 |
| -0.0002226 | -0.0003000 | 0.0000000 |    |   |    |   |    |   |              |              |
| 2938:      | 37         | 6         | 32 | 1 | 36 | 6 | 31 | 0 | 1334.7978100 | 1334.7977122 |
| 0.0000978  | -0.0003000 | 0.0000000 |    |   |    |   |    |   |              |              |
| 2939:      | 38         | 6         | 33 | 1 | 37 | 6 | 32 | 0 | 1335.0551300 | 1335.0552004 |
| -0.0000704 | -0.0003000 | 0.0000000 |    |   |    |   |    |   |              |              |
| 2940:      | 39         | 6         | 34 | 1 | 38 | 6 | 33 | 0 | 1335.3127500 | 1335.3125987 |
| 0.0001513  | -0.0003000 | 0.0000000 |    |   |    |   |    |   |              |              |
| 2941:      | 40         | 6         | 35 | 1 | 39 | 6 | 34 | 0 | 1335.5697000 | 1335.5699087 |
| -0.0002087 | -0.0003000 | 0.0000000 |    |   |    |   |    |   |              |              |
| 2942:      | 41         | 6         | 36 | 1 | 40 | 6 | 35 | 0 | 1335.8273200 | 1335.8271317 |
| 0.0001883  | -0.0003000 | 0.0000000 |    |   |    |   |    |   |              |              |
| 2943:      | 42         | 6         | 37 | 1 | 41 | 6 | 36 | 0 | 1336.0842700 | 1336.0842689 |
| 0.0000011  | -0.0003000 | 0.0000000 |    |   |    |   |    |   |              |              |
| 2944:      | 43         | 6         | 38 | 1 | 42 | 6 | 37 | 0 | 1336.3415400 | 1336.3413211 |
| 0.0002189  | -0.0003000 | 0.0000000 |    |   |    |   |    |   |              |              |
| 2945:      | 44         | 6         | 39 | 1 | 43 | 6 | 38 | 0 | 1336.5988600 | 1336.5982890 |
| 0.0005710  | -0.0003000 | 0.0000000 |    |   |    |   |    |   |              |              |
| 2946:      | 45         | 6         | 40 | 1 | 44 | 6 | 39 | 0 | 1336.8554900 | 1336.8551728 |
| 0.0003172  | -0.0003000 | 0.0000000 |    |   |    |   |    |   |              |              |
| 2947:      | 53         | 6         | 48 | 1 | 52 | 6 | 47 | 0 | 1338.9070900 | 1338.9070889 |
| 0.0000011  | -0.0003000 | 0.0000000 |    |   |    |   |    |   |              |              |
| 2948:      | 54         | 6         | 49 | 1 | 53 | 6 | 48 | 0 | 1339.1631400 | 1339.1631394 |
| 0.0000006  | -0.0003000 | 0.0000000 |    |   |    |   |    |   |              |              |
| 2949:      | 55         | 6         | 50 | 1 | 54 | 6 | 49 | 0 | 1339.4189400 | 1339.4190740 |
| -0.0001340 | -0.0003000 | 0.0000000 |    |   |    |   |    |   |              |              |
| 2950:      | 56         | 6         | 51 | 1 | 55 | 6 | 50 | 0 | 1339.6749900 | 1339.6748842 |
| 0.0001058  | -0.0003000 | 0.0000000 |    |   |    |   |    |   |              |              |
| 2951:      | 57         | 6         | 52 | 1 | 56 | 6 | 51 | 0 | 1339.9304600 | 1339.9305601 |
| -0.0001001 | -0.0003000 | 0.0000000 |    |   |    |   |    |   |              |              |
| 2952:      | 58         | 6         | 53 | 1 | 57 | 6 | 52 | 0 | 1340.1861200 | 1340.1860903 |
| 0.0000297  | -0.0003000 | 0.0000000 |    |   |    |   |    |   |              |              |
| 2953:      | 59         | 6         | 54 | 1 | 58 | 6 | 53 | 0 | 1340.4415800 | 1340.4414619 |
| 0.0001181  | -0.0003000 | 0.0000000 |    |   |    |   |    |   |              |              |
| 2954:      | 60         | 6         | 55 | 1 | 59 | 6 | 54 | 0 | 1340.6968300 | 1340.6966605 |
| 0.0001695  | -0.0003000 | 0.0000000 |    |   |    |   |    |   |              |              |
| 2955:      | 61         | 6         | 56 | 1 | 60 | 6 | 55 | 0 | 1340.9516700 | 1340.9516699 |

|            |            |           |              |              |
|------------|------------|-----------|--------------|--------------|
| 0.0000001  | -0.0003000 | 0.0000000 |              |              |
| 2956: 62   | 6 57 1 61  | 6 56 0    | 1341.2063800 | 1341.2064724 |
| -0.0000924 | -0.0003000 | 0.0000000 |              |              |
| 2957: 63   | 6 58 1 62  | 6 57 0    | 1341.4608700 | 1341.4610486 |
| -0.0001786 | -0.0003000 | 0.0000000 |              |              |
| 2958: 64   | 6 59 1 63  | 6 58 0    | 1341.7154900 | 1341.7153772 |
| 0.0001128  | -0.0003000 | 0.0000000 |              |              |
| 2959: 67   | 6 62 1 66  | 6 61 0    | 1342.4764600 | 1342.4766413 |
| -0.0001813 | -0.0003000 | 0.0000000 |              |              |
| 2960: 68   | 6 63 1 67  | 6 62 0    | 1342.7297400 | 1342.7297354 |
| 0.0000046  | -0.0003000 | 0.0000000 |              |              |
| 2961: 69   | 6 64 1 68  | 6 63 0    | 1342.9822100 | 1342.9824519 |
| -0.0002419 | -0.0003000 | 0.0000000 |              |              |
| 2962: 70   | 6 65 1 69  | 6 64 0    | 1343.2346400 | 1343.2347609 |
| -0.0001209 | -0.0003000 | 0.0000000 |              |              |
| 2963: 73   | 6 68 1 72  | 6 67 0    | 1343.9887700 | 1343.9889239 |
| -0.0001539 | -0.0003000 | 0.0000000 |              |              |
| 2964: 74   | 6 69 1 73  | 6 68 0    | 1344.2393700 | 1344.2392802 |
| 0.0000898  | -0.0003000 | 0.0000000 |              |              |
| 2965: 75   | 6 70 1 74  | 6 69 0    | 1344.4888400 | 1344.4890646 |
| -0.0002246 | -0.0003000 | 0.0000000 |              |              |
| 2966: 76   | 6 71 1 75  | 6 70 0    | 1344.7380500 | 1344.7382428 |
| -0.0001928 | -0.0003000 | 0.0000000 |              |              |
| 2967: 78   | 6 73 1 77  | 6 72 0    | 1345.2343700 | 1345.2346446 |
| -0.0002746 | -0.0003000 | 0.0000000 |              |              |
| 2968: 80   | 6 75 1 79  | 6 74 0    | 1345.7277700 | 1345.7282175 |
| -0.0004475 | -0.0003000 | 0.0000000 |              |              |
| 2969: 81   | 6 76 1 80  | 6 75 0    | 1345.9743100 | 1345.9738623 |
| 0.0004477  | -0.0003000 | 0.0000000 |              |              |
| 2970: 82   | 6 77 1 81  | 6 76 0    | 1346.2185200 | 1346.2187049 |
| -0.0001849 | -0.0003000 | 0.0000000 |              |              |
| 2971: 84   | 6 79 1 83  | 6 78 0    | 1346.7049900 | 1346.7058682 |
| -0.0008782 | -0.0003000 | 0.0000000 |              |              |
| 2972: 85   | 6 80 1 84  | 6 79 0    | 1346.9476300 | 1346.9481353 |
| -0.0005053 | -0.0003000 | 0.0000000 |              |              |
| 2973: 86   | 7 79 1 87  | 7 80 0    | 1301.8020000 | 1301.8022778 |
| -0.0002778 | -0.0003000 | 0.0000000 |              |              |
| 2974: 85   | 7 78 1 86  | 7 79 0    | 1302.0739400 | 1302.0742401 |
| -0.0003001 | -0.0003000 | 0.0000000 |              |              |
| 2975: 84   | 7 77 1 85  | 7 78 0    | 1302.3465000 | 1302.3460787 |
| 0.0004213  | -0.0003000 | 0.0000000 |              |              |
| 2976: 83   | 7 76 1 84  | 7 77 0    | 1302.6180700 | 1302.6177885 |
| 0.0002815  | -0.0003000 | 0.0000000 |              |              |
| 2977: 82   | 7 75 1 83  | 7 76 0    | 1302.8904500 | 1302.8893666 |
| 0.0010834  | -0.0003000 | 0.0000000 |              |              |
| 2978: 81   | 7 74 1 82  | 7 75 0    | 1303.1616500 | 1303.1608115 |
| 0.0008385  | -0.0003000 | 0.0000000 |              |              |
| 2979: 79   | 7 72 1 80  | 7 73 0    | 1303.7036300 | 1303.7033031 |
| 0.0003269  | -0.0003000 | 0.0000000 |              |              |
| 2980: 78   | 7 71 1 79  | 7 72 0    | 1303.9746100 | 1303.9743529 |
| 0.0002571  | -0.0003000 | 0.0000000 |              |              |
| 2981: 77   | 7 70 1 78  | 7 71 0    | 1304.2453900 | 1304.2452756 |
| 0.0001144  | -0.0003000 | 0.0000000 |              |              |
| 2982: 76   | 7 69 1 77  | 7 70 0    | 1304.5164400 | 1304.5160741 |
| 0.0003659  | -0.0003000 | 0.0000000 |              |              |
| 2983: 75   | 7 68 1 76  | 7 69 0    | 1304.7867000 | 1304.7867520 |
| -0.0000520 | -0.0003000 | 0.0000000 |              |              |
| 2984: 74   | 7 67 1 75  | 7 68 0    | 1305.0570300 | 1305.0573127 |
| -0.0002827 | -0.0003000 | 0.0000000 |              |              |
| 2985: 72   | 7 65 1 73  | 7 66 0    | 1305.5977000 | 1305.5980976 |
| -0.0003976 | -0.0003000 | 0.0000000 |              |              |
| 2986: 71   | 7 64 1 72  | 7 65 0    | 1305.8686600 | 1305.8683286 |
| 0.0003314  | -0.0003000 | 0.0000000 |              |              |
| 2987: 70   | 7 63 1 71  | 7 64 0    | 1306.1383200 | 1306.1384563 |
| -0.0001363 | -0.0003000 | 0.0000000 |              |              |

|            |                      |              |              |
|------------|----------------------|--------------|--------------|
| 2988: 69   | 7 62 1 70 7 63 0     | 1306.4082900 | 1306.4084839 |
| -0.0001939 | -0.0003000 0.0000000 |              |              |
| 2989: 68   | 7 61 1 69 7 62 0     | 1306.6787900 | 1306.6784139 |
| 0.0003761  | -0.0003000 0.0000000 |              |              |
| 2990: 61   | 7 54 1 62 7 55 0     | 1308.5658500 | 1308.5653596 |
| 0.0004904  | -0.0003000 0.0000000 |              |              |
| 2991: 60   | 7 53 1 61 7 54 0     | 1308.8348100 | 1308.8345719 |
| 0.0002381  | -0.0003000 0.0000000 |              |              |
| 2992: 59   | 7 52 1 60 7 53 0     | 1309.1042000 | 1309.1036982 |
| 0.0005018  | -0.0003000 0.0000000 |              |              |
| 2993: 58   | 7 51 1 59 7 52 0     | 1309.3727900 | 1309.3727384 |
| 0.0000516  | -0.0003000 0.0000000 |              |              |
| 2994: 57   | 7 50 1 58 7 51 0     | 1309.6417700 | 1309.6416923 |
| 0.0000777  | -0.0003000 0.0000000 |              |              |
| 2995: 56   | 7 49 1 57 7 50 0     | 1309.9107000 | 1309.9105595 |
| 0.0001405  | -0.0003000 0.0000000 |              |              |
| 2996: 55   | 7 48 1 56 7 49 0     | 1310.1795600 | 1310.1793395 |
| 0.0002205  | -0.0003000 0.0000000 |              |              |
| 2997: 54   | 7 47 1 55 7 48 0     | 1310.4480700 | 1310.4480315 |
| 0.0000385  | -0.0003000 0.0000000 |              |              |
| 2998: 53   | 7 46 1 54 7 47 0     | 1310.7167800 | 1310.7166348 |
| 0.0001452  | -0.0003000 0.0000000 |              |              |
| 2999: 52   | 7 45 1 53 7 46 0     | 1310.9851100 | 1310.9851483 |
| -0.0000383 | -0.0003000 0.0000000 |              |              |
| 3000: 51   | 7 44 1 52 7 45 0     | 1311.2535800 | 1311.2535712 |
| 0.0000088  | -0.0003000 0.0000000 |              |              |
| 3001: 50   | 7 43 1 51 7 44 0     | 1311.5218700 | 1311.5219022 |
| -0.0000322 | -0.0003000 0.0000000 |              |              |
| 3002: 49   | 7 42 1 50 7 43 0     | 1311.7901800 | 1311.7901402 |
| 0.0000398  | -0.0003000 0.0000000 |              |              |
| 3003: 48   | 7 41 1 49 7 42 0     | 1312.0583000 | 1312.0582839 |
| 0.0000161  | -0.0003000 0.0000000 |              |              |
| 3004: 47   | 7 40 1 48 7 41 0     | 1312.3262100 | 1312.3263319 |
| -0.0001219 | -0.0003000 0.0000000 |              |              |
| 3005: 46   | 7 39 1 47 7 40 0     | 1312.5942400 | 1312.5942830 |
| -0.0000430 | -0.0003000 0.0000000 |              |              |
| 3006: 45   | 7 38 1 46 7 39 0     | 1312.8623600 | 1312.8621358 |
| 0.0002242  | -0.0003000 0.0000000 |              |              |
| 3007: 44   | 7 37 1 45 7 38 0     | 1313.1301200 | 1313.1298889 |
| 0.0002311  | -0.0003000 0.0000000 |              |              |
| 3008: 42   | 7 35 1 43 7 36 0     | 1313.6650800 | 1313.6650902 |
| -0.0000102 | -0.0003000 0.0000000 |              |              |
| 3009: 30   | 7 23 1 31 7 24 0     | 1316.8671600 | 1316.8671678 |
| -0.0000078 | -0.0003000 0.0000000 |              |              |
| 3010: 29   | 7 22 1 30 7 23 0     | 1317.1332300 | 1317.1332570 |
| -0.0000270 | -0.0003000 0.0000000 |              |              |
| 3011: 28   | 7 21 1 29 7 22 0     | 1317.3991100 | 1317.3992248 |
| -0.0001148 | -0.0003000 0.0000000 |              |              |
| 3012: 27   | 7 20 1 28 7 21 0     | 1317.6651300 | 1317.6650701 |
| 0.0000599  | -0.0003000 0.0000000 |              |              |
| 3013: 26   | 7 19 1 27 7 20 0     | 1317.9307300 | 1317.9307917 |
| -0.0000617 | -0.0003000 0.0000000 |              |              |
| 3014: 25   | 7 18 1 26 7 19 0     | 1318.1961000 | 1318.1963885 |
| -0.0002885 | -0.0003000 0.0000000 |              |              |
| 3015: 24   | 7 17 1 25 7 18 0     | 1318.4619000 | 1318.4618596 |
| 0.0000404  | -0.0003000 0.0000000 |              |              |
| 3016: 23   | 7 16 1 24 7 17 0     | 1318.7270200 | 1318.7272037 |
| -0.0001837 | -0.0003000 0.0000000 |              |              |
| 3017: 22   | 7 15 1 23 7 16 0     | 1318.9924400 | 1318.9924201 |
| 0.0000199  | -0.0003000 0.0000000 |              |              |
| 3018: 21   | 7 14 1 22 7 15 0     | 1319.2575100 | 1319.2575076 |
| 0.0000024  | -0.0003000 0.0000000 |              |              |
| 3019: 20   | 7 13 1 21 7 14 0     | 1319.5223600 | 1319.5224654 |
| -0.0001054 | -0.0003000 0.0000000 |              |              |
| 3020: 19   | 7 12 1 20 7 13 0     | 1319.7872000 | 1319.7872926 |

|            |            |                  |              |              |
|------------|------------|------------------|--------------|--------------|
| -0.0000926 | -0.0003000 | 0.0000000        |              |              |
| 3021:      | 18         | 7 11 1 19 7 12 0 | 1320.0520000 | 1320.0519883 |
| 0.0000117  | -0.0003000 | 0.0000000        |              |              |
| 3022:      | 17         | 7 10 1 18 7 11 0 | 1320.3164900 | 1320.3165518 |
| -0.0000618 | -0.0003000 | 0.0000000        |              |              |
| 3023:      | 16         | 7 9 1 17 7 10 0  | 1320.5810200 | 1320.5809823 |
| 0.0000377  | -0.0003000 | 0.0000000        |              |              |
| 3024:      | 15         | 7 8 1 16 7 9 0   | 1320.8453000 | 1320.8452789 |
| 0.0000211  | -0.0003000 | 0.0000000        |              |              |
| 3025:      | 14         | 7 7 1 15 7 8 0   | 1321.1093900 | 1321.1094411 |
| -0.0000511 | -0.0003000 | 0.0000000        |              |              |
| 3026:      | 13         | 7 6 1 14 7 7 0   | 1321.3734100 | 1321.3734681 |
| -0.0000581 | -0.0003000 | 0.0000000        |              |              |
| 3027:      | 12         | 7 5 1 13 7 6 0   | 1321.6370900 | 1321.6373594 |
| -0.0002694 | -0.0003000 | 0.0000000        |              |              |
| 3028:      | 11         | 7 4 1 12 7 5 0   | 1321.9010900 | 1321.9011142 |
| -0.0000242 | -0.0003000 | 0.0000000        |              |              |
| 3029:      | 10         | 7 3 1 11 7 4 0   | 1322.1645000 | 1322.1647322 |
| -0.0002322 | -0.0003000 | 0.0000000        |              |              |
| 3030:      | 9          | 7 2 1 10 7 3 0   | 1322.4281700 | 1322.4282127 |
| -0.0000427 | -0.0003000 | 0.0000000        |              |              |
| 3031:      | 8          | 7 1 1 9 7 2 0    | 1322.6913300 | 1322.6915553 |
| -0.0002253 | -0.0003000 | 0.0000000        |              |              |
| 3032:      | 7          | 7 0 1 8 7 1 0    | 1322.9544500 | 1322.9547595 |
| -0.0003095 | -0.0003000 | 0.0000000        |              |              |
| 3033:      | 8          | 7 1 1 7 7 0 0    | 1327.1468200 | 1327.1469795 |
| -0.0001595 | -0.0003000 | 0.0000000        |              |              |
| 3034:      | 9          | 7 2 1 8 7 1 0    | 1327.4077700 | 1327.4077965 |
| -0.0000265 | -0.0003000 | 0.0000000        |              |              |
| 3035:      | 10         | 7 3 1 9 7 2 0    | 1327.6684500 | 1327.6684729 |
| -0.0000229 | -0.0003000 | 0.0000000        |              |              |
| 3036:      | 11         | 7 4 1 10 7 3 0   | 1327.9288900 | 1327.9290088 |
| -0.0001188 | -0.0003000 | 0.0000000        |              |              |
| 3037:      | 12         | 7 5 1 11 7 4 0   | 1328.1893900 | 1328.1894044 |
| -0.0000144 | -0.0003000 | 0.0000000        |              |              |
| 3038:      | 13         | 7 6 1 12 7 5 0   | 1328.4500100 | 1328.4496599 |
| 0.0003501  | -0.0003000 | 0.0000000        |              |              |
| 3039:      | 14         | 7 7 1 13 7 6 0   | 1328.7098700 | 1328.7097755 |
| 0.0000945  | -0.0003000 | 0.0000000        |              |              |
| 3040:      | 15         | 7 8 1 14 7 7 0   | 1328.9697500 | 1328.9697516 |
| -0.0000016 | -0.0003000 | 0.0000000        |              |              |
| 3041:      | 16         | 7 9 1 15 7 8 0   | 1329.2294000 | 1329.2295884 |
| -0.0001884 | -0.0003000 | 0.0000000        |              |              |
| 3042:      | 17         | 7 10 1 16 7 9 0  | 1329.4892200 | 1329.4892863 |
| -0.0000663 | -0.0003000 | 0.0000000        |              |              |
| 3043:      | 18         | 7 11 1 17 7 10 0 | 1329.7487200 | 1329.7488456 |
| -0.0001256 | -0.0003000 | 0.0000000        |              |              |
| 3044:      | 19         | 7 12 1 18 7 11 0 | 1330.0083800 | 1330.0082666 |
| 0.0001134  | -0.0003000 | 0.0000000        |              |              |
| 3045:      | 20         | 7 13 1 19 7 12 0 | 1330.2675000 | 1330.2675497 |
| -0.0000497 | -0.0003000 | 0.0000000        |              |              |
| 3046:      | 21         | 7 14 1 20 7 13 0 | 1330.5267700 | 1330.5266954 |
| 0.0000746  | -0.0003000 | 0.0000000        |              |              |
| 3047:      | 22         | 7 15 1 21 7 14 0 | 1330.7857000 | 1330.7857042 |
| -0.0000042 | -0.0003000 | 0.0000000        |              |              |
| 3048:      | 31         | 7 24 1 30 7 23 0 | 1333.1107700 | 1333.1107027 |
| 0.0000673  | -0.0003000 | 0.0000000        |              |              |
| 3049:      | 32         | 7 25 1 31 7 24 0 | 1333.3680100 | 1333.3683712 |
| -0.0003612 | -0.0003000 | 0.0000000        |              |              |
| 3050:      | 33         | 7 26 1 32 7 25 0 | 1333.6261700 | 1333.6259093 |
| 0.0002607  | -0.0003000 | 0.0000000        |              |              |
| 3051:      | 34         | 7 27 1 33 7 26 0 | 1333.8834800 | 1333.8833177 |
| 0.0001623  | -0.0003000 | 0.0000000        |              |              |
| 3052:      | 35         | 7 28 1 34 7 27 0 | 1334.1404400 | 1334.1405972 |
| -0.0001572 | -0.0003000 | 0.0000000        |              |              |

|            |            |           |    |   |    |   |    |   |              |              |
|------------|------------|-----------|----|---|----|---|----|---|--------------|--------------|
| 3053:      | 36         | 7         | 29 | 1 | 35 | 7 | 28 | 0 | 1334.3975100 | 1334.3977488 |
| -0.0002388 | -0.0003000 | 0.0000000 |    |   |    |   |    |   |              |              |
| 3054:      | 37         | 7         | 30 | 1 | 36 | 7 | 29 | 0 | 1334.6548200 | 1334.6547733 |
| 0.0000467  | -0.0003000 | 0.0000000 |    |   |    |   |    |   |              |              |
| 3055:      | 38         | 7         | 31 | 1 | 37 | 7 | 30 | 0 | 1334.9117400 | 1334.9116716 |
| 0.0000684  | -0.0003000 | 0.0000000 |    |   |    |   |    |   |              |              |
| 3056:      | 39         | 7         | 32 | 1 | 38 | 7 | 31 | 0 | 1335.1684300 | 1335.1684448 |
| -0.0000148 | -0.0003000 | 0.0000000 |    |   |    |   |    |   |              |              |
| 3057:      | 40         | 7         | 33 | 1 | 39 | 7 | 32 | 0 | 1335.4252200 | 1335.4250938 |
| 0.0001262  | -0.0003000 | 0.0000000 |    |   |    |   |    |   |              |              |
| 3058:      | 44         | 7         | 37 | 1 | 43 | 7 | 36 | 0 | 1336.4501200 | 1336.4504733 |
| -0.0003533 | -0.0003000 | 0.0000000 |    |   |    |   |    |   |              |              |
| 3059:      | 45         | 7         | 38 | 1 | 44 | 7 | 37 | 0 | 1336.7064200 | 1336.7065206 |
| -0.0001006 | -0.0003000 | 0.0000000 |    |   |    |   |    |   |              |              |
| 3060:      | 46         | 7         | 39 | 1 | 45 | 7 | 38 | 0 | 1336.9624500 | 1336.9624520 |
| -0.0000020 | -0.0003000 | 0.0000000 |    |   |    |   |    |   |              |              |
| 3061:      | 47         | 7         | 40 | 1 | 46 | 7 | 39 | 0 | 1337.2182400 | 1337.2182692 |
| -0.0000292 | -0.0003000 | 0.0000000 |    |   |    |   |    |   |              |              |
| 3062:      | 50         | 7         | 43 | 1 | 49 | 7 | 42 | 0 | 1337.9850100 | 1337.9850561 |
| -0.0000461 | -0.0003000 | 0.0000000 |    |   |    |   |    |   |              |              |
| 3063:      | 51         | 7         | 44 | 1 | 50 | 7 | 43 | 0 | 1338.2403300 | 1338.2404379 |
| -0.0001079 | -0.0003000 | 0.0000000 |    |   |    |   |    |   |              |              |
| 3064:      | 52         | 7         | 45 | 1 | 51 | 7 | 44 | 0 | 1338.4955900 | 1338.4957174 |
| -0.0001274 | -0.0003000 | 0.0000000 |    |   |    |   |    |   |              |              |
| 3065:      | 53         | 7         | 46 | 1 | 52 | 7 | 45 | 0 | 1338.7507300 | 1338.7508976 |
| -0.0001676 | -0.0003000 | 0.0000000 |    |   |    |   |    |   |              |              |
| 3066:      | 54         | 7         | 47 | 1 | 53 | 7 | 46 | 0 | 1339.0056900 | 1339.0059821 |
| -0.0002921 | -0.0003000 | 0.0000000 |    |   |    |   |    |   |              |              |
| 3067:      | 55         | 7         | 48 | 1 | 54 | 7 | 47 | 0 | 1339.2607100 | 1339.2609749 |
| -0.0002649 | -0.0003000 | 0.0000000 |    |   |    |   |    |   |              |              |
| 3068:      | 56         | 7         | 49 | 1 | 55 | 7 | 48 | 0 | 1339.5155900 | 1339.5158804 |
| -0.0002904 | -0.0003000 | 0.0000000 |    |   |    |   |    |   |              |              |
| 3069:      | 57         | 7         | 50 | 1 | 56 | 7 | 49 | 0 | 1339.7703300 | 1339.7707035 |
| -0.0003735 | -0.0003000 | 0.0000000 |    |   |    |   |    |   |              |              |
| 3070:      | 58         | 7         | 51 | 1 | 57 | 7 | 50 | 0 | 1340.0249800 | 1340.0254497 |
| -0.0004697 | -0.0003000 | 0.0000000 |    |   |    |   |    |   |              |              |
| 3071:      | 65         | 7         | 58 | 1 | 64 | 7 | 57 | 0 | 1341.8072100 | 1341.8071545 |
| 0.0000555  | -0.0003000 | 0.0000000 |    |   |    |   |    |   |              |              |
| 3072:      | 66         | 7         | 59 | 1 | 65 | 7 | 58 | 0 | 1342.0611900 | 1342.0615877 |
| -0.0003977 | -0.0003000 | 0.0000000 |    |   |    |   |    |   |              |              |
| 3073:      | 67         | 7         | 60 | 1 | 66 | 7 | 59 | 0 | 1342.3158800 | 1342.3160366 |
| -0.0001566 | -0.0003000 | 0.0000000 |    |   |    |   |    |   |              |              |
| 3074:      | 69         | 7         | 62 | 1 | 68 | 7 | 61 | 0 | 1342.8249000 | 1342.8250525 |
| -0.0001525 | -0.0003000 | 0.0000000 |    |   |    |   |    |   |              |              |
| 3075:      | 70         | 7         | 63 | 1 | 69 | 7 | 62 | 0 | 1343.0794800 | 1343.0796596 |
| -0.0001796 | -0.0003000 | 0.0000000 |    |   |    |   |    |   |              |              |
| 3076:      | 71         | 7         | 64 | 1 | 70 | 7 | 63 | 0 | 1343.3345700 | 1343.3343630 |
| 0.0002070  | -0.0003000 | 0.0000000 |    |   |    |   |    |   |              |              |
| 3077:      | 72         | 7         | 65 | 1 | 71 | 7 | 64 | 0 | 1343.5892800 | 1343.5891884 |
| 0.0000916  | -0.0003000 | 0.0000000 |    |   |    |   |    |   |              |              |
| 3078:      | 74         | 7         | 67 | 1 | 73 | 7 | 66 | 0 | 1344.0990400 | 1344.0993189 |
| -0.0002789 | -0.0003000 | 0.0000000 |    |   |    |   |    |   |              |              |
| 3079:      | 75         | 7         | 68 | 1 | 74 | 7 | 67 | 0 | 1344.3548300 | 1344.3546873 |
| 0.0001427  | -0.0003000 | 0.0000000 |    |   |    |   |    |   |              |              |
| 3080:      | 76         | 7         | 69 | 1 | 75 | 7 | 68 | 0 | 1344.6103500 | 1344.6103039 |
| 0.0000461  | -0.0003000 | 0.0000000 |    |   |    |   |    |   |              |              |
| 3081:      | 77         | 7         | 70 | 1 | 76 | 7 | 69 | 0 | 1344.8661100 | 1344.8662065 |
| -0.0000965 | -0.0003000 | 0.0000000 |    |   |    |   |    |   |              |              |
| 3082:      | 78         | 7         | 71 | 1 | 77 | 7 | 70 | 0 | 1345.1224400 | 1345.1224350 |
| 0.0000050  | -0.0003000 | 0.0000000 |    |   |    |   |    |   |              |              |
| 3083:      | 79         | 7         | 72 | 1 | 78 | 7 | 71 | 0 | 1345.3787900 | 1345.3790311 |
| -0.0002411 | -0.0003000 | 0.0000000 |    |   |    |   |    |   |              |              |
| 3084:      | 80         | 7         | 73 | 1 | 79 | 7 | 72 | 0 | 1345.6358200 | 1345.6360382 |
| -0.0002182 | -0.0003000 | 0.0000000 |    |   |    |   |    |   |              |              |
| 3085:      | 83         | 7         | 76 | 1 | 82 | 7 | 75 | 0 | 1346.4103800 | 1346.4099695 |

|            |            |           |              |              |
|------------|------------|-----------|--------------|--------------|
| 0.0004105  | -0.0003000 | 0.0000000 |              |              |
| 3086: 84   | 7 77       | 1 83      | 7 76         | 0            |
| 0.0006880  | -0.0003000 | 0.0000000 | 1346.6697500 | 1346.6690620 |
| 3087: 85   | 7 78       | 1 84      | 7 77         | 0            |
| -0.0001798 | -0.0003000 | 0.0000000 | 1346.9286000 | 1346.9287798 |
| 3088: 86   | 7 79       | 1 85      | 7 78         | 0            |
| 0.0003027  | -0.0003000 | 0.0000000 | 1347.1894600 | 1347.1891573 |
| 3089: 87   | 7 80       | 1 86      | 7 79         | 0            |
| -0.0005825 | -0.0003000 | 0.0000000 | 1347.4496400 | 1347.4502225 |
| 3090: 88   | 7 81       | 1 87      | 7 80         | 0            |
| -0.0001451 | -0.0003000 | 0.0000000 | 1347.7118500 | 1347.7119951 |
| 3091: 89   | 7 82       | 1 88      | 7 81         | 0            |
| -0.0001943 | -0.0003000 | 0.0000000 | 1347.9742900 | 1347.9744843 |
| 3092: 83   | 7 77       | 1 84      | 7 78         | 0            |
| 0.0003467  | -0.0003000 | 0.0000000 | 1302.6408500 | 1302.6405033 |
| 3093: 82   | 7 76       | 1 83      | 7 77         | 0            |
| -0.0000075 | -0.0003000 | 0.0000000 | 1302.9096700 | 1302.9096775 |
| 3094: 80   | 7 74       | 1 81      | 7 75         | 0            |
| 0.0009585  | -0.0003000 | 0.0000000 | 1303.4491600 | 1303.4482015 |
| 3095: 79   | 7 73       | 1 80      | 7 74         | 0            |
| 0.0012124  | -0.0003000 | 0.0000000 | 1303.7187500 | 1303.7175376 |
| 3096: 78   | 7 72       | 1 79      | 7 73         | 0            |
| -0.0000539 | -0.0003000 | 0.0000000 | 1303.9868600 | 1303.9869139 |
| 3097: 77   | 7 71       | 1 78      | 7 72         | 0            |
| -0.0002735 | -0.0003000 | 0.0000000 | 1304.2560500 | 1304.2563235 |
| 3098: 74   | 7 68       | 1 75      | 7 69         | 0            |
| 0.0004968  | -0.0003000 | 0.0000000 | 1305.0651800 | 1305.0646832 |
| 3099: 73   | 7 67       | 1 74      | 7 68         | 0            |
| 0.0002421  | -0.0003000 | 0.0000000 | 1305.3344000 | 1305.3341579 |
| 3100: 72   | 7 66       | 1 73      | 7 67         | 0            |
| 0.0001274  | -0.0003000 | 0.0000000 | 1305.6037600 | 1305.6036326 |
| 3101: 70   | 7 64       | 1 71      | 7 65         | 0            |
| 0.0004626  | -0.0003000 | 0.0000000 | 1306.1430200 | 1306.1425574 |
| 3102: 69   | 7 63       | 1 70      | 7 64         | 0            |
| 0.0001241  | -0.0003000 | 0.0000000 | 1306.4121200 | 1306.4119959 |
| 3103: 68   | 7 62       | 1 69      | 7 63         | 0            |
| -0.0004110 | -0.0003000 | 0.0000000 | 1306.6810000 | 1306.6814110 |
| 3104: 61   | 7 55       | 1 62      | 7 56         | 0            |
| -0.0004015 | -0.0003000 | 0.0000000 | 1308.5658500 | 1308.5662515 |
| 3105: 60   | 7 54       | 1 61      | 7 55         | 0            |
| -0.0005005 | -0.0003000 | 0.0000000 | 1308.8348100 | 1308.8353105 |
| 3106: 59   | 7 53       | 1 60      | 7 54         | 0            |
| -0.0001073 | -0.0003000 | 0.0000000 | 1309.1042000 | 1309.1043073 |
| 3107: 58   | 7 52       | 1 59      | 7 53         | 0            |
| -0.0004486 | -0.0003000 | 0.0000000 | 1309.3727900 | 1309.3732386 |
| 3108: 57   | 7 51       | 1 58      | 7 52         | 0            |
| -0.0003313 | -0.0003000 | 0.0000000 | 1309.6417700 | 1309.6421013 |
| 3109: 56   | 7 50       | 1 57      | 7 51         | 0            |
| -0.0001924 | -0.0003000 | 0.0000000 | 1309.9107000 | 1309.9108924 |
| 3110: 55   | 7 49       | 1 56      | 7 50         | 0            |
| -0.0000493 | -0.0003000 | 0.0000000 | 1310.1795600 | 1310.1796093 |
| 3111: 54   | 7 48       | 1 55      | 7 49         | 0            |
| -0.0001791 | -0.0003000 | 0.0000000 | 1310.4480700 | 1310.4482491 |
| 3112: 53   | 7 47       | 1 54      | 7 48         | 0            |
| -0.0000294 | -0.0003000 | 0.0000000 | 1310.7167800 | 1310.7168094 |
| 3113: 52   | 7 46       | 1 53      | 7 47         | 0            |
| -0.0001778 | -0.0003000 | 0.0000000 | 1310.9851100 | 1310.9852878 |
| 3114: 51   | 7 45       | 1 52      | 7 46         | 0            |
| -0.0001020 | -0.0003000 | 0.0000000 | 1311.2535800 | 1311.2536820 |
| 3115: 50   | 7 44       | 1 51      | 7 45         | 0            |
| -0.0001198 | -0.0003000 | 0.0000000 | 1311.5218700 | 1311.5219898 |
| 3116: 49   | 7 43       | 1 50      | 7 44         | 0            |
| -0.0000290 | -0.0003000 | 0.0000000 | 1311.7901800 | 1311.7902090 |
| 3117: 48   | 7 42       | 1 49      | 7 43         | 0            |
| -0.0000376 | -0.0003000 | 0.0000000 | 1312.0583000 | 1312.0583376 |

|                                 |              |              |
|---------------------------------|--------------|--------------|
| 3118: 47 7 41 1 48 7 42 0       | 1312.3262100 | 1312.3263737 |
| -0.0001637 -0.0003000 0.0000000 |              |              |
| 3119: 46 7 40 1 47 7 41 0       | 1312.5942400 | 1312.5943153 |
| -0.0000753 -0.0003000 0.0000000 |              |              |
| 3120: 45 7 39 1 46 7 40 0       | 1312.8623600 | 1312.8621606 |
| 0.0001994 -0.0003000 0.0000000  |              |              |
| 3121: 44 7 38 1 45 7 39 0       | 1313.1301200 | 1313.1299078 |
| 0.0002122 -0.0003000 0.0000000  |              |              |
| 3122: 42 7 36 1 43 7 37 0       | 1313.6650800 | 1313.6651009 |
| -0.0000209 -0.0003000 0.0000000 |              |              |
| 3123: 30 7 24 1 31 7 25 0       | 1316.8671600 | 1316.8671679 |
| -0.0000079 -0.0003000 0.0000000 |              |              |
| 3124: 29 7 23 1 30 7 24 0       | 1317.1332300 | 1317.1332571 |
| -0.0000271 -0.0003000 0.0000000 |              |              |
| 3125: 28 7 22 1 29 7 23 0       | 1317.3991100 | 1317.3992249 |
| -0.0001149 -0.0003000 0.0000000 |              |              |
| 3126: 27 7 21 1 28 7 22 0       | 1317.6651300 | 1317.6650701 |
| 0.0000599 -0.0003000 0.0000000  |              |              |
| 3127: 26 7 20 1 27 7 21 0       | 1317.9307300 | 1317.9307917 |
| -0.0000617 -0.0003000 0.0000000 |              |              |
| 3128: 25 7 19 1 26 7 20 0       | 1318.1961000 | 1318.1963886 |
| -0.0002886 -0.0003000 0.0000000 |              |              |
| 3129: 24 7 18 1 25 7 19 0       | 1318.4619000 | 1318.4618596 |
| 0.0000404 -0.0003000 0.0000000  |              |              |
| 3130: 23 7 17 1 24 7 18 0       | 1318.7270200 | 1318.7272037 |
| -0.0001837 -0.0003000 0.0000000 |              |              |
| 3131: 22 7 16 1 23 7 17 0       | 1318.9924400 | 1318.9924201 |
| 0.0000199 -0.0003000 0.0000000  |              |              |
| 3132: 21 7 15 1 22 7 16 0       | 1319.2575100 | 1319.2575076 |
| 0.0000024 -0.0003000 0.0000000  |              |              |
| 3133: 20 7 14 1 21 7 15 0       | 1319.5223600 | 1319.5224654 |
| -0.0001054 -0.0003000 0.0000000 |              |              |
| 3134: 19 7 13 1 20 7 14 0       | 1319.7872000 | 1319.7872926 |
| -0.0000926 -0.0003000 0.0000000 |              |              |
| 3135: 18 7 12 1 19 7 13 0       | 1320.0520000 | 1320.0519883 |
| 0.0000117 -0.0003000 0.0000000  |              |              |
| 3136: 17 7 11 1 18 7 12 0       | 1320.3164900 | 1320.3165518 |
| -0.0000618 -0.0003000 0.0000000 |              |              |
| 3137: 16 7 10 1 17 7 11 0       | 1320.5810200 | 1320.5809823 |
| 0.0000377 -0.0003000 0.0000000  |              |              |
| 3138: 15 7 9 1 16 7 10 0        | 1320.8453000 | 1320.8452789 |
| 0.0000211 -0.0003000 0.0000000  |              |              |
| 3139: 14 7 8 1 15 7 9 0         | 1321.1093900 | 1321.1094411 |
| -0.0000511 -0.0003000 0.0000000 |              |              |
| 3140: 13 7 7 1 14 7 8 0         | 1321.3734100 | 1321.3734681 |
| -0.0000581 -0.0003000 0.0000000 |              |              |
| 3141: 12 7 6 1 13 7 7 0         | 1321.6370900 | 1321.6373594 |
| -0.0002694 -0.0003000 0.0000000 |              |              |
| 3142: 11 7 5 1 12 7 6 0         | 1321.9010900 | 1321.9011142 |
| -0.0000242 -0.0003000 0.0000000 |              |              |
| 3143: 10 7 4 1 11 7 5 0         | 1322.1645000 | 1322.1647322 |
| -0.0002322 -0.0003000 0.0000000 |              |              |
| 3144: 9 7 3 1 10 7 4 0          | 1322.4281700 | 1322.4282127 |
| -0.0000427 -0.0003000 0.0000000 |              |              |
| 3145: 8 7 2 1 9 7 3 0           | 1322.6913300 | 1322.6915553 |
| -0.0002253 -0.0003000 0.0000000 |              |              |
| 3146: 7 7 1 1 8 7 2 0           | 1322.9544500 | 1322.9547595 |
| -0.0003095 -0.0003000 0.0000000 |              |              |
| 3147: 8 7 2 1 7 7 1 0           | 1327.1468200 | 1327.1469795 |
| -0.0001595 -0.0003000 0.0000000 |              |              |
| 3148: 9 7 3 1 8 7 2 0           | 1327.4077700 | 1327.4077965 |
| -0.0000265 -0.0003000 0.0000000 |              |              |
| 3149: 10 7 4 1 9 7 3 0          | 1327.6684500 | 1327.6684729 |
| -0.0000229 -0.0003000 0.0000000 |              |              |
| 3150: 11 7 5 1 10 7 4 0         | 1327.9288900 | 1327.9290088 |

|            |            |           |              |              |
|------------|------------|-----------|--------------|--------------|
| -0.0001188 | -0.0003000 | 0.0000000 |              |              |
| 3151: 12   | 7 6 1 11   | 7 5 0     | 1328.1893900 | 1328.1894044 |
| -0.0000144 | -0.0003000 | 0.0000000 |              |              |
| 3152: 13   | 7 7 1 12   | 7 6 0     | 1328.4500100 | 1328.4496599 |
| 0.0003501  | -0.0003000 | 0.0000000 |              |              |
| 3153: 14   | 7 8 1 13   | 7 7 0     | 1328.7098700 | 1328.7097755 |
| 0.0000945  | -0.0003000 | 0.0000000 |              |              |
| 3154: 15   | 7 9 1 14   | 7 8 0     | 1328.9697500 | 1328.9697516 |
| -0.0000016 | -0.0003000 | 0.0000000 |              |              |
| 3155: 16   | 7 10 1 15  | 7 9 0     | 1329.2294000 | 1329.2295884 |
| -0.0001884 | -0.0003000 | 0.0000000 |              |              |
| 3156: 17   | 7 11 1 16  | 7 10 0    | 1329.4892200 | 1329.4892863 |
| -0.0000663 | -0.0003000 | 0.0000000 |              |              |
| 3157: 18   | 7 12 1 17  | 7 11 0    | 1329.7487200 | 1329.7488456 |
| -0.0001256 | -0.0003000 | 0.0000000 |              |              |
| 3158: 19   | 7 13 1 18  | 7 12 0    | 1330.0083800 | 1330.0082666 |
| 0.0001134  | -0.0003000 | 0.0000000 |              |              |
| 3159: 20   | 7 14 1 19  | 7 13 0    | 1330.2675000 | 1330.2675497 |
| -0.0000497 | -0.0003000 | 0.0000000 |              |              |
| 3160: 21   | 7 15 1 20  | 7 14 0    | 1330.5267700 | 1330.5266954 |
| 0.0000746  | -0.0003000 | 0.0000000 |              |              |
| 3161: 22   | 7 16 1 21  | 7 15 0    | 1330.7857000 | 1330.7857042 |
| -0.0000042 | -0.0003000 | 0.0000000 |              |              |
| 3162: 31   | 7 25 1 30  | 7 24 0    | 1333.1107700 | 1333.1107025 |
| 0.0000675  | -0.0003000 | 0.0000000 |              |              |
| 3163: 32   | 7 26 1 31  | 7 25 0    | 1333.3680100 | 1333.3683708 |
| -0.0003608 | -0.0003000 | 0.0000000 |              |              |
| 3164: 33   | 7 27 1 32  | 7 26 0    | 1333.6261700 | 1333.6259087 |
| 0.0002613  | -0.0003000 | 0.0000000 |              |              |
| 3165: 34   | 7 28 1 33  | 7 27 0    | 1333.8834800 | 1333.8833168 |
| 0.0001632  | -0.0003000 | 0.0000000 |              |              |
| 3166: 35   | 7 29 1 34  | 7 28 0    | 1334.1404400 | 1334.1405960 |
| -0.0001560 | -0.0003000 | 0.0000000 |              |              |
| 3167: 36   | 7 30 1 35  | 7 29 0    | 1334.3975100 | 1334.3977469 |
| -0.0002369 | -0.0003000 | 0.0000000 |              |              |
| 3168: 37   | 7 31 1 36  | 7 30 0    | 1334.6548200 | 1334.6547706 |
| 0.0000494  | -0.0003000 | 0.0000000 |              |              |
| 3169: 38   | 7 32 1 37  | 7 31 0    | 1334.9117400 | 1334.9116678 |
| 0.0000722  | -0.0003000 | 0.0000000 |              |              |
| 3170: 39   | 7 33 1 38  | 7 32 0    | 1335.1684300 | 1335.1684394 |
| -0.0000094 | -0.0003000 | 0.0000000 |              |              |
| 3171: 40   | 7 34 1 39  | 7 33 0    | 1335.4252200 | 1335.4250864 |
| 0.0001336  | -0.0003000 | 0.0000000 |              |              |
| 3172: 44   | 7 38 1 43  | 7 37 0    | 1336.4501200 | 1336.4504472 |
| -0.0003272 | -0.0003000 | 0.0000000 |              |              |
| 3173: 45   | 7 39 1 44  | 7 38 0    | 1336.7064200 | 1336.7064857 |
| -0.0000657 | -0.0003000 | 0.0000000 |              |              |
| 3174: 46   | 7 40 1 45  | 7 39 0    | 1336.9624500 | 1336.9624055 |
| 0.0000445  | -0.0003000 | 0.0000000 |              |              |
| 3175: 47   | 7 41 1 46  | 7 40 0    | 1337.2182400 | 1337.2182077 |
| 0.0000323  | -0.0003000 | 0.0000000 |              |              |
| 3176: 50   | 7 44 1 49  | 7 43 0    | 1337.9850100 | 1337.9849189 |
| 0.0000911  | -0.0003000 | 0.0000000 |              |              |
| 3177: 51   | 7 45 1 50  | 7 44 0    | 1338.2403300 | 1338.2402608 |
| 0.0000692  | -0.0003000 | 0.0000000 |              |              |
| 3178: 52   | 7 46 1 51  | 7 45 0    | 1338.4955900 | 1338.4954898 |
| 0.0001002  | -0.0003000 | 0.0000000 |              |              |
| 3179: 53   | 7 47 1 52  | 7 46 0    | 1338.7507300 | 1338.7506067 |
| 0.0001233  | -0.0003000 | 0.0000000 |              |              |
| 3180: 54   | 7 48 1 53  | 7 47 0    | 1339.0056900 | 1339.0056123 |
| 0.0000777  | -0.0003000 | 0.0000000 |              |              |
| 3181: 55   | 7 49 1 54  | 7 48 0    | 1339.2607100 | 1339.2605070 |
| 0.0002030  | -0.0003000 | 0.0000000 |              |              |
| 3182: 56   | 7 50 1 55  | 7 49 0    | 1339.5155900 | 1339.5152912 |
| 0.0002988  | -0.0003000 | 0.0000000 |              |              |

|       |            |            |           |   |    |   |    |   |              |              |
|-------|------------|------------|-----------|---|----|---|----|---|--------------|--------------|
| 3183: | 57         | 7          | 51        | 1 | 56 | 7 | 50 | 0 | 1339.7703300 | 1339.7699650 |
|       | 0.0003650  | -0.0003000 | 0.0000000 |   |    |   |    |   |              |              |
| 3184: | 58         | 7          | 52        | 1 | 57 | 7 | 51 | 0 | 1340.0249800 | 1340.0245283 |
|       | 0.0004517  | -0.0003000 | 0.0000000 |   |    |   |    |   |              |              |
| 3185: | 65         | 7          | 59        | 1 | 64 | 7 | 58 | 0 | 1341.8030900 | 1341.8032890 |
|       | -0.0001990 | -0.0003000 | 0.0000000 |   |    |   |    |   |              |              |
| 3186: | 66         | 7          | 60        | 1 | 65 | 7 | 59 | 0 | 1342.0571500 | 1342.0569157 |
|       | 0.0002343  | -0.0003000 | 0.0000000 |   |    |   |    |   |              |              |
| 3187: | 67         | 7          | 61        | 1 | 66 | 7 | 60 | 0 | 1342.3107300 | 1342.3104103 |
|       | 0.0003197  | -0.0003000 | 0.0000000 |   |    |   |    |   |              |              |
| 3188: | 68         | 7          | 62        | 1 | 67 | 7 | 61 | 0 | 1342.5639400 | 1342.5637668 |
|       | 0.0001732  | -0.0003000 | 0.0000000 |   |    |   |    |   |              |              |
| 3189: | 70         | 7          | 64        | 1 | 69 | 7 | 63 | 0 | 1343.0698000 | 1343.0700368 |
|       | -0.0002368 | -0.0003000 | 0.0000000 |   |    |   |    |   |              |              |
| 3190: | 71         | 7          | 65        | 1 | 70 | 7 | 64 | 0 | 1343.3228800 | 1343.3229331 |
|       | -0.0000531 | -0.0003000 | 0.0000000 |   |    |   |    |   |              |              |
| 3191: | 72         | 7          | 66        | 1 | 71 | 7 | 65 | 0 | 1343.5757400 | 1343.5756569 |
|       | 0.0000831  | -0.0003000 | 0.0000000 |   |    |   |    |   |              |              |
| 3192: | 73         | 7          | 67        | 1 | 72 | 7 | 66 | 0 | 1343.8280800 | 1343.8281965 |
|       | -0.0001165 | -0.0003000 | 0.0000000 |   |    |   |    |   |              |              |
| 3193: | 74         | 7          | 68        | 1 | 73 | 7 | 67 | 0 | 1344.0804200 | 1344.0805387 |
|       | -0.0001187 | -0.0003000 | 0.0000000 |   |    |   |    |   |              |              |
| 3194: | 75         | 7          | 69        | 1 | 74 | 7 | 68 | 0 | 1344.3325000 | 1344.3326692 |
|       | -0.0001692 | -0.0003000 | 0.0000000 |   |    |   |    |   |              |              |
| 3195: | 76         | 7          | 70        | 1 | 75 | 7 | 69 | 0 | 1344.5853700 | 1344.5845719 |
|       | 0.0007981  | -0.0003000 | 0.0000000 |   |    |   |    |   |              |              |
| 3196: | 77         | 7          | 71        | 1 | 76 | 7 | 70 | 0 | 1344.8366200 | 1344.8362293 |
|       | 0.0003907  | -0.0003000 | 0.0000000 |   |    |   |    |   |              |              |
| 3197: | 78         | 7          | 72        | 1 | 77 | 7 | 71 | 0 | 1345.0870200 | 1345.0876224 |
|       | -0.0006024 | -0.0003000 | 0.0000000 |   |    |   |    |   |              |              |
| 3198: | 79         | 7          | 73        | 1 | 78 | 7 | 72 | 0 | 1345.3384400 | 1345.3387305 |
|       | -0.0002905 | -0.0003000 | 0.0000000 |   |    |   |    |   |              |              |
| 3199: | 80         | 7          | 74        | 1 | 79 | 7 | 73 | 0 | 1345.5891000 | 1345.5895316 |
|       | -0.0004316 | -0.0003000 | 0.0000000 |   |    |   |    |   |              |              |
| 3200: | 81         | 7          | 75        | 1 | 80 | 7 | 74 | 0 | 1345.8400700 | 1345.8400020 |
|       | 0.0000680  | -0.0003000 | 0.0000000 |   |    |   |    |   |              |              |
| 3201: | 82         | 7          | 76        | 1 | 81 | 7 | 75 | 0 | 1346.0902600 | 1346.0901164 |
|       | 0.0001436  | -0.0003000 | 0.0000000 |   |    |   |    |   |              |              |
| 3202: | 83         | 7          | 77        | 1 | 82 | 7 | 76 | 0 | 1346.3399400 | 1346.3398484 |
|       | 0.0000916  | -0.0003000 | 0.0000000 |   |    |   |    |   |              |              |
| 3203: | 86         | 7          | 80        | 1 | 85 | 7 | 79 | 0 | 1347.0865100 | 1347.0864641 |
|       | 0.0000459  | -0.0003000 | 0.0000000 |   |    |   |    |   |              |              |
| 3204: | 87         | 7          | 81        | 1 | 86 | 7 | 80 | 0 | 1347.3343500 | 1347.3343751 |
|       | -0.0000251 | -0.0003000 | 0.0000000 |   |    |   |    |   |              |              |
| 3205: | 88         | 7          | 82        | 1 | 87 | 7 | 81 | 0 | 1347.5822100 | 1347.5817529 |
|       | 0.0004571  | -0.0003000 | 0.0000000 |   |    |   |    |   |              |              |
| 3206: | 90         | 7          | 84        | 1 | 89 | 7 | 83 | 0 | 1348.0755500 | 1348.0747770 |
|       | 0.0007730  | -0.0003000 | 0.0000000 |   |    |   |    |   |              |              |
| 3207: | 91         | 7          | 85        | 1 | 90 | 7 | 84 | 0 | 1348.3207300 | 1348.3203564 |
|       | 0.0003736  | -0.0003000 | 0.0000000 |   |    |   |    |   |              |              |
| 3208: | 94         | 8          | 86        | 1 | 95 | 8 | 87 | 0 | 1299.5296600 | 1299.5293720 |
|       | 0.0002880  | -0.0003000 | 0.0000000 |   |    |   |    |   |              |              |
| 3209: | 93         | 8          | 85        | 1 | 94 | 8 | 86 | 0 | 1299.7997400 | 1299.7993545 |
|       | 0.0003855  | -0.0003000 | 0.0000000 |   |    |   |    |   |              |              |
| 3210: | 92         | 8          | 84        | 1 | 93 | 8 | 85 | 0 | 1300.0695900 | 1300.0692991 |
|       | 0.0002909  | -0.0003000 | 0.0000000 |   |    |   |    |   |              |              |
| 3211: | 90         | 8          | 82        | 1 | 91 | 8 | 83 | 0 | 1300.6094400 | 1300.6090739 |
|       | 0.0003661  | -0.0003000 | 0.0000000 |   |    |   |    |   |              |              |
| 3212: | 58         | 8          | 50        | 1 | 59 | 8 | 51 | 0 | 1309.2243900 | 1309.2244180 |
|       | -0.0000280 | -0.0003000 | 0.0000000 |   |    |   |    |   |              |              |
| 3213: | 57         | 8          | 49        | 1 | 58 | 8 | 50 | 0 | 1309.4927300 | 1309.4928520 |
|       | -0.0001220 | -0.0003000 | 0.0000000 |   |    |   |    |   |              |              |
| 3214: | 54         | 8          | 46        | 1 | 55 | 8 | 47 | 0 | 1310.2984400 | 1310.2977552 |
|       | 0.0006848  | -0.0003000 | 0.0000000 |   |    |   |    |   |              |              |
| 3215: | 53         | 8          | 45        | 1 | 54 | 8 | 46 | 0 | 1310.5660300 | 1310.5659172 |

|            |            |           |              |              |
|------------|------------|-----------|--------------|--------------|
| 0.0001128  | -0.0003000 | 0.0000000 |              |              |
| 3216: 52   | 8 44 1 53  | 8 45 0    | 1310.8340900 | 1310.8340067 |
| 0.0000833  | -0.0003000 | 0.0000000 |              |              |
| 3217: 51   | 8 43 1 52  | 8 44 0    | 1311.1021300 | 1311.1020218 |
| 0.0001082  | -0.0003000 | 0.0000000 |              |              |
| 3218: 50   | 8 42 1 51  | 8 43 0    | 1311.3699300 | 1311.3699606 |
| -0.0000306 | -0.0003000 | 0.0000000 |              |              |
| 3219: 49   | 8 41 1 50  | 8 42 0    | 1311.6378900 | 1311.6378215 |
| 0.0000685  | -0.0003000 | 0.0000000 |              |              |
| 3220: 48   | 8 40 1 49  | 8 41 0    | 1311.9055500 | 1311.9056027 |
| -0.0000527 | -0.0003000 | 0.0000000 |              |              |
| 3221: 47   | 8 39 1 48  | 8 40 0    | 1312.1734400 | 1312.1733022 |
| 0.0001378  | -0.0003000 | 0.0000000 |              |              |
| 3222: 46   | 8 38 1 47  | 8 39 0    | 1312.4408400 | 1312.4409185 |
| -0.0000785 | -0.0003000 | 0.0000000 |              |              |
| 3223: 45   | 8 37 1 46  | 8 38 0    | 1312.7084500 | 1312.7084498 |
| 0.0000002  | -0.0003000 | 0.0000000 |              |              |
| 3224: 44   | 8 36 1 45  | 8 37 0    | 1312.9762300 | 1312.9758942 |
| 0.0003358  | -0.0003000 | 0.0000000 |              |              |
| 3225: 43   | 8 35 1 44  | 8 36 0    | 1313.2434000 | 1313.2432502 |
| 0.0001498  | -0.0003000 | 0.0000000 |              |              |
| 3226: 41   | 8 33 1 42  | 8 34 0    | 1313.7776700 | 1313.7776900 |
| -0.0000200 | -0.0003000 | 0.0000000 |              |              |
| 3227: 40   | 8 32 1 41  | 8 33 0    | 1314.0444200 | 1314.0447705 |
| -0.0003505 | -0.0003000 | 0.0000000 |              |              |
| 3228: 39   | 8 31 1 40  | 8 32 0    | 1314.3117400 | 1314.3117558 |
| -0.0000158 | -0.0003000 | 0.0000000 |              |              |
| 3229: 38   | 8 30 1 39  | 8 31 0    | 1314.5785800 | 1314.5786445 |
| -0.0000645 | -0.0003000 | 0.0000000 |              |              |
| 3230: 37   | 8 29 1 38  | 8 30 0    | 1314.8454600 | 1314.8454348 |
| 0.0000252  | -0.0003000 | 0.0000000 |              |              |
| 3231: 36   | 8 28 1 37  | 8 29 0    | 1315.1119400 | 1315.1121252 |
| -0.0001852 | -0.0003000 | 0.0000000 |              |              |
| 3232: 35   | 8 27 1 36  | 8 28 0    | 1315.3787200 | 1315.3787142 |
| 0.0000058  | -0.0003000 | 0.0000000 |              |              |
| 3233: 34   | 8 26 1 35  | 8 27 0    | 1315.6451000 | 1315.6452002 |
| -0.0001002 | -0.0003000 | 0.0000000 |              |              |
| 3234: 33   | 8 25 1 34  | 8 26 0    | 1315.9114800 | 1315.9115818 |
| -0.0001018 | -0.0003000 | 0.0000000 |              |              |
| 3235: 32   | 8 24 1 33  | 8 25 0    | 1316.1779000 | 1316.1778575 |
| 0.0000425  | -0.0003000 | 0.0000000 |              |              |
| 3236: 31   | 8 23 1 32  | 8 24 0    | 1316.4438700 | 1316.4440258 |
| -0.0001558 | -0.0003000 | 0.0000000 |              |              |
| 3237: 30   | 8 22 1 31  | 8 23 0    | 1316.7101400 | 1316.7100854 |
| 0.0000546  | -0.0003000 | 0.0000000 |              |              |
| 3238: 29   | 8 21 1 30  | 8 22 0    | 1316.9759200 | 1316.9760347 |
| -0.0001147 | -0.0003000 | 0.0000000 |              |              |
| 3239: 28   | 8 20 1 29  | 8 21 0    | 1317.2418800 | 1317.2418725 |
| 0.0000075  | -0.0003000 | 0.0000000 |              |              |
| 3240: 27   | 8 19 1 28  | 8 20 0    | 1317.5074700 | 1317.5075974 |
| -0.0001274 | -0.0003000 | 0.0000000 |              |              |
| 3241: 26   | 8 18 1 27  | 8 19 0    | 1317.7731200 | 1317.7732081 |
| -0.0000881 | -0.0003000 | 0.0000000 |              |              |
| 3242: 25   | 8 17 1 26  | 8 18 0    | 1318.0384000 | 1318.0387032 |
| -0.0003032 | -0.0003000 | 0.0000000 |              |              |
| 3243: 24   | 8 16 1 25  | 8 17 0    | 1318.3041600 | 1318.3040816 |
| 0.0000784  | -0.0003000 | 0.0000000 |              |              |
| 3244: 23   | 8 15 1 24  | 8 16 0    | 1318.5693500 | 1318.5693419 |
| 0.0000081  | -0.0003000 | 0.0000000 |              |              |
| 3245: 22   | 8 14 1 23  | 8 15 0    | 1318.8344100 | 1318.8344830 |
| -0.0000730 | -0.0003000 | 0.0000000 |              |              |
| 3246: 21   | 8 13 1 22  | 8 14 0    | 1319.0997800 | 1319.0995036 |
| 0.0002764  | -0.0003000 | 0.0000000 |              |              |
| 3247: 20   | 8 12 1 21  | 8 13 0    | 1319.3643800 | 1319.3644027 |
| -0.0000227 | -0.0003000 | 0.0000000 |              |              |

|            |            |           |              |              |
|------------|------------|-----------|--------------|--------------|
| 3248: 19   | 8 11 1 20  | 8 12 0    | 1319.6291100 | 1319.6291790 |
| -0.0000690 | -0.0003000 | 0.0000000 |              |              |
| 3249: 18   | 8 10 1 19  | 8 11 0    | 1319.8939100 | 1319.8938314 |
| 0.0000786  | -0.0003000 | 0.0000000 |              |              |
| 3250: 17   | 8 9 1 18   | 8 10 0    | 1320.1584700 | 1320.1583589 |
| 0.0001111  | -0.0003000 | 0.0000000 |              |              |
| 3251: 16   | 8 8 1 17   | 8 9 0     | 1320.4227100 | 1320.4227605 |
| -0.0000505 | -0.0003000 | 0.0000000 |              |              |
| 3252: 15   | 8 7 1 16   | 8 8 0     | 1320.6871600 | 1320.6870350 |
| 0.0001250  | -0.0003000 | 0.0000000 |              |              |
| 3253: 14   | 8 6 1 15   | 8 7 0     | 1320.9512800 | 1320.9511815 |
| 0.0000985  | -0.0003000 | 0.0000000 |              |              |
| 3254: 13   | 8 5 1 14   | 8 6 0     | 1321.2148700 | 1321.2151991 |
| -0.0003291 | -0.0003000 | 0.0000000 |              |              |
| 3255: 12   | 8 4 1 13   | 8 5 0     | 1321.4791200 | 1321.4790867 |
| 0.0000333  | -0.0003000 | 0.0000000 |              |              |
| 3256: 11   | 8 3 1 12   | 8 4 0     | 1321.7428600 | 1321.7428434 |
| 0.0000166  | -0.0003000 | 0.0000000 |              |              |
| 3257: 10   | 8 2 1 11   | 8 3 0     | 1322.0063500 | 1322.0064684 |
| -0.0001184 | -0.0003000 | 0.0000000 |              |              |
| 3258: 9    | 8 1 1 10   | 8 2 0     | 1322.2699600 | 1322.2699607 |
| -0.0000007 | -0.0003000 | 0.0000000 |              |              |
| 3259: 9    | 8 1 1 8    | 8 0 0     | 1327.2501300 | 1327.2501424 |
| -0.0000124 | -0.0003000 | 0.0000000 |              |              |
| 3260: 10   | 8 2 1 9    | 8 1 0     | 1327.5107400 | 1327.5108376 |
| -0.0000976 | -0.0003000 | 0.0000000 |              |              |
| 3261: 11   | 8 3 1 10   | 8 2 0     | 1327.7713400 | 1327.7713875 |
| -0.0000475 | -0.0003000 | 0.0000000 |              |              |
| 3262: 12   | 8 4 1 11   | 8 3 0     | 1328.0319900 | 1328.0317916 |
| 0.0001984  | -0.0003000 | 0.0000000 |              |              |
| 3263: 13   | 8 5 1 12   | 8 4 0     | 1328.2919700 | 1328.2920497 |
| -0.0000797 | -0.0003000 | 0.0000000 |              |              |
| 3264: 14   | 8 6 1 13   | 8 5 0     | 1328.5521700 | 1328.5521613 |
| 0.0000087  | -0.0003000 | 0.0000000 |              |              |
| 3265: 15   | 8 7 1 14   | 8 6 0     | 1328.8121800 | 1328.8121263 |
| 0.0000537  | -0.0003000 | 0.0000000 |              |              |
| 3266: 16   | 8 8 1 15   | 8 7 0     | 1329.0719200 | 1329.0719442 |
| -0.0000242 | -0.0003000 | 0.0000000 |              |              |
| 3267: 17   | 8 9 1 16   | 8 8 0     | 1329.3314900 | 1329.3316149 |
| -0.0001249 | -0.0003000 | 0.0000000 |              |              |
| 3268: 18   | 8 10 1 17  | 8 9 0     | 1329.5910200 | 1329.5911380 |
| -0.0001180 | -0.0003000 | 0.0000000 |              |              |
| 3269: 19   | 8 11 1 18  | 8 10 0    | 1329.8505100 | 1329.8505132 |
| -0.0000032 | -0.0003000 | 0.0000000 |              |              |
| 3270: 20   | 8 12 1 19  | 8 11 0    | 1330.1099100 | 1330.1097404 |
| 0.0001696  | -0.0003000 | 0.0000000 |              |              |
| 3271: 21   | 8 13 1 20  | 8 12 0    | 1330.3689800 | 1330.3688193 |
| 0.0001607  | -0.0003000 | 0.0000000 |              |              |
| 3272: 22   | 8 14 1 21  | 8 13 0    | 1330.6280200 | 1330.6277498 |
| 0.0002702  | -0.0003000 | 0.0000000 |              |              |
| 3273: 23   | 8 15 1 22  | 8 14 0    | 1330.8863700 | 1330.8865315 |
| -0.0001615 | -0.0003000 | 0.0000000 |              |              |
| 3274: 24   | 8 16 1 23  | 8 15 0    | 1331.1450800 | 1331.1451644 |
| -0.0000844 | -0.0003000 | 0.0000000 |              |              |
| 3275: 25   | 8 17 1 24  | 8 16 0    | 1331.4033300 | 1331.4036483 |
| -0.0003183 | -0.0003000 | 0.0000000 |              |              |
| 3276: 26   | 8 18 1 25  | 8 17 0    | 1331.6616000 | 1331.6619830 |
| -0.0003830 | -0.0003000 | 0.0000000 |              |              |
| 3277: 27   | 8 19 1 26  | 8 18 0    | 1331.9204500 | 1331.9201684 |
| 0.0002816  | -0.0003000 | 0.0000000 |              |              |
| 3278: 28   | 8 20 1 27  | 8 19 0    | 1332.1784200 | 1332.1782044 |
| 0.0002156  | -0.0003000 | 0.0000000 |              |              |
| 3279: 29   | 8 21 1 28  | 8 20 0    | 1332.4361900 | 1332.4360908 |
| 0.0000992  | -0.0003000 | 0.0000000 |              |              |
| 3280: 30   | 8 22 1 29  | 8 21 0    | 1332.6939500 | 1332.6938277 |

|            |            |           |              |              |
|------------|------------|-----------|--------------|--------------|
| 0.0001223  | -0.0003000 | 0.0000000 |              |              |
| 3281: 31   | 8 23 1 30  | 8 22 0    | 1332.9513200 | 1332.9514148 |
| -0.0000948 | -0.0003000 | 0.0000000 |              |              |
| 3282: 32   | 8 24 1 31  | 8 23 0    | 1333.2087300 | 1333.2088521 |
| -0.0001221 | -0.0003000 | 0.0000000 |              |              |
| 3283: 33   | 8 25 1 32  | 8 24 0    | 1333.4661700 | 1333.4661397 |
| 0.0000303  | -0.0003000 | 0.0000000 |              |              |
| 3284: 34   | 8 26 1 33  | 8 25 0    | 1333.7232400 | 1333.7232774 |
| -0.0000374 | -0.0003000 | 0.0000000 |              |              |
| 3285: 35   | 8 27 1 34  | 8 26 0    | 1333.9805000 | 1333.9802652 |
| 0.0002348  | -0.0003000 | 0.0000000 |              |              |
| 3286: 36   | 8 28 1 35  | 8 27 0    | 1334.2369800 | 1334.2371032 |
| -0.0001232 | -0.0003000 | 0.0000000 |              |              |
| 3287: 37   | 8 29 1 36  | 8 28 0    | 1334.4938000 | 1334.4937913 |
| 0.0000087  | -0.0003000 | 0.0000000 |              |              |
| 3288: 38   | 8 30 1 37  | 8 29 0    | 1334.7505000 | 1334.7503295 |
| 0.0001705  | -0.0003000 | 0.0000000 |              |              |
| 3289: 39   | 8 31 1 38  | 8 30 0    | 1335.0067600 | 1335.0067180 |
| 0.0000420  | -0.0003000 | 0.0000000 |              |              |
| 3290: 40   | 8 32 1 39  | 8 31 0    | 1335.2630200 | 1335.2629567 |
| 0.0000633  | -0.0003000 | 0.0000000 |              |              |
| 3291: 41   | 8 33 1 40  | 8 32 0    | 1335.5190600 | 1335.5190459 |
| 0.0000141  | -0.0003000 | 0.0000000 |              |              |
| 3292: 42   | 8 34 1 41  | 8 33 0    | 1335.7749900 | 1335.7749854 |
| 0.0000046  | -0.0003000 | 0.0000000 |              |              |
| 3293: 43   | 8 35 1 42  | 8 34 0    | 1336.0308200 | 1336.0307756 |
| 0.0000444  | -0.0003000 | 0.0000000 |              |              |
| 3294: 44   | 8 36 1 43  | 8 35 0    | 1336.2864500 | 1336.2864165 |
| 0.0000335  | -0.0003000 | 0.0000000 |              |              |
| 3295: 45   | 8 37 1 44  | 8 36 0    | 1336.5418100 | 1336.5419083 |
| -0.0000983 | -0.0003000 | 0.0000000 |              |              |
| 3296: 46   | 8 38 1 45  | 8 37 0    | 1336.7972300 | 1336.7972513 |
| -0.0000213 | -0.0003000 | 0.0000000 |              |              |
| 3297: 47   | 8 39 1 46  | 8 38 0    | 1337.0526000 | 1337.0524455 |
| 0.0001545  | -0.0003000 | 0.0000000 |              |              |
| 3298: 48   | 8 40 1 47  | 8 39 0    | 1337.3077000 | 1337.3074914 |
| 0.0002086  | -0.0003000 | 0.0000000 |              |              |
| 3299: 49   | 8 41 1 48  | 8 40 0    | 1337.5623900 | 1337.5623892 |
| 0.0000008  | -0.0003000 | 0.0000000 |              |              |
| 3300: 50   | 8 42 1 49  | 8 41 0    | 1337.8171400 | 1337.8171391 |
| 0.0000009  | -0.0003000 | 0.0000000 |              |              |
| 3301: 51   | 8 43 1 50  | 8 42 0    | 1338.0716300 | 1338.0717417 |
| -0.0001117 | -0.0003000 | 0.0000000 |              |              |
| 3302: 52   | 8 44 1 51  | 8 43 0    | 1338.3265100 | 1338.3261974 |
| 0.0003126  | -0.0003000 | 0.0000000 |              |              |
| 3303: 53   | 8 45 1 52  | 8 44 0    | 1338.5804800 | 1338.5805065 |
| -0.0000265 | -0.0003000 | 0.0000000 |              |              |
| 3304: 54   | 8 46 1 53  | 8 45 0    | 1338.8346500 | 1338.8346696 |
| -0.0000196 | -0.0003000 | 0.0000000 |              |              |
| 3305: 55   | 8 47 1 54  | 8 46 0    | 1339.0885200 | 1339.0886874 |
| -0.0001674 | -0.0003000 | 0.0000000 |              |              |
| 3306: 56   | 8 48 1 55  | 8 47 0    | 1339.3425400 | 1339.3425605 |
| -0.0000205 | -0.0003000 | 0.0000000 |              |              |
| 3307: 57   | 8 49 1 56  | 8 48 0    | 1339.5965000 | 1339.5962897 |
| 0.0002103  | -0.0003000 | 0.0000000 |              |              |
| 3308: 58   | 8 50 1 57  | 8 49 0    | 1339.8499500 | 1339.8498757 |
| 0.0000743  | -0.0003000 | 0.0000000 |              |              |
| 3309: 59   | 8 51 1 58  | 8 50 0    | 1340.1032900 | 1340.1033197 |
| -0.0000297 | -0.0003000 | 0.0000000 |              |              |
| 3310: 60   | 8 52 1 59  | 8 51 0    | 1340.3565500 | 1340.3566225 |
| -0.0000725 | -0.0003000 | 0.0000000 |              |              |
| 3311: 61   | 8 53 1 60  | 8 52 0    | 1340.6097900 | 1340.6097855 |
| 0.0000045  | -0.0003000 | 0.0000000 |              |              |
| 3312: 62   | 8 54 1 61  | 8 53 0    | 1340.8627000 | 1340.8628100 |
| -0.0001100 | -0.0003000 | 0.0000000 |              |              |

|            |                      |              |              |
|------------|----------------------|--------------|--------------|
| 3313: 63   | 8 55 1 62 8 54 0     | 1341.1156300 | 1341.1156975 |
| -0.0000675 | -0.0003000 0.0000000 |              |              |
| 3314: 64   | 8 56 1 63 8 55 0     | 1341.3683200 | 1341.3684497 |
| -0.0001297 | -0.0003000 0.0000000 |              |              |
| 3315: 65   | 8 57 1 64 8 56 0     | 1341.6208400 | 1341.6210687 |
| -0.0002287 | -0.0003000 0.0000000 |              |              |
| 3316: 66   | 8 58 1 65 8 57 0     | 1341.8734400 | 1341.8735567 |
| -0.0001167 | -0.0003000 0.0000000 |              |              |
| 3317: 67   | 8 59 1 66 8 58 0     | 1342.1257300 | 1342.1259160 |
| -0.0001860 | -0.0003000 0.0000000 |              |              |
| 3318: 68   | 8 60 1 67 8 59 0     | 1342.3779700 | 1342.3781496 |
| -0.0001796 | -0.0003000 0.0000000 |              |              |
| 3319: 69   | 8 61 1 68 8 60 0     | 1342.6300300 | 1342.6302606 |
| -0.0002306 | -0.0003000 0.0000000 |              |              |
| 3320: 78   | 8 70 1 77 8 69 0     | 1344.8947200 | 1344.8945207 |
| 0.0001993  | -0.0003000 0.0000000 |              |              |
| 3321: 79   | 8 71 1 78 8 70 0     | 1345.1454600 | 1345.1457024 |
| -0.0002424 | -0.0003000 0.0000000 |              |              |
| 3322: 80   | 8 72 1 79 8 71 0     | 1345.3970800 | 1345.3968383 |
| 0.0002417  | -0.0003000 0.0000000 |              |              |
| 3323: 81   | 8 73 1 80 8 72 0     | 1345.6480100 | 1345.6479412 |
| 0.0000688  | -0.0003000 0.0000000 |              |              |
| 3324: 82   | 8 74 1 81 8 73 0     | 1345.8982100 | 1345.8990256 |
| -0.0008156 | -0.0003000 0.0000000 |              |              |
| 3325: 83   | 8 75 1 82 8 74 0     | 1346.1506500 | 1346.1501073 |
| 0.0005427  | -0.0003000 0.0000000 |              |              |
| 3326: 84   | 8 76 1 83 8 75 0     | 1346.4012600 | 1346.4012039 |
| 0.0000561  | -0.0003000 0.0000000 |              |              |
| 3327: 86   | 8 78 1 85 8 77 0     | 1346.9038100 | 1346.9035217 |
| 0.0002883  | -0.0003000 0.0000000 |              |              |
| 3328: 87   | 8 79 1 86 8 78 0     | 1347.1550900 | 1347.1547875 |
| 0.0003025  | -0.0003000 0.0000000 |              |              |
| 3329: 88   | 8 80 1 87 8 79 0     | 1347.4060900 | 1347.4061580 |
| -0.0000680 | -0.0003000 0.0000000 |              |              |
| 3330: 94   | 8 87 1 95 8 88 0     | 1299.5404300 | 1299.5399954 |
| 0.0004346  | -0.0003000 0.0000000 |              |              |
| 3331: 92   | 8 85 1 93 8 86 0     | 1300.0775200 | 1300.0777550 |
| -0.0002350 | -0.0003000 0.0000000 |              |              |
| 3332: 89   | 8 82 1 90 8 83 0     | 1300.8845900 | 1300.8847786 |
| -0.0001886 | -0.0003000 0.0000000 |              |              |
| 3333: 58   | 8 51 1 59 8 52 0     | 1309.2243900 | 1309.2244432 |
| -0.0000532 | -0.0003000 0.0000000 |              |              |
| 3334: 57   | 8 50 1 58 8 51 0     | 1309.4927300 | 1309.4928719 |
| -0.0001419 | -0.0003000 0.0000000 |              |              |
| 3335: 54   | 8 47 1 55 8 48 0     | 1310.2984400 | 1310.2977647 |
| 0.0006753  | -0.0003000 0.0000000 |              |              |
| 3336: 53   | 8 46 1 54 8 47 0     | 1310.5660300 | 1310.5659246 |
| 0.0001054  | -0.0003000 0.0000000 |              |              |
| 3337: 52   | 8 45 1 53 8 46 0     | 1310.8340900 | 1310.8340123 |
| 0.0000777  | -0.0003000 0.0000000 |              |              |
| 3338: 51   | 8 44 1 52 8 45 0     | 1311.1021300 | 1311.1020261 |
| 0.0001039  | -0.0003000 0.0000000 |              |              |
| 3339: 50   | 8 43 1 51 8 44 0     | 1311.3699300 | 1311.3699639 |
| -0.0000339 | -0.0003000 0.0000000 |              |              |
| 3340: 49   | 8 42 1 50 8 43 0     | 1311.6378900 | 1311.6378240 |
| 0.0000660  | -0.0003000 0.0000000 |              |              |
| 3341: 48   | 8 41 1 49 8 42 0     | 1311.9055500 | 1311.9056045 |
| -0.0000545 | -0.0003000 0.0000000 |              |              |
| 3342: 47   | 8 40 1 48 8 41 0     | 1312.1734400 | 1312.1733036 |
| 0.0001364  | -0.0003000 0.0000000 |              |              |
| 3343: 46   | 8 39 1 47 8 40 0     | 1312.4408400 | 1312.4409195 |
| -0.0000795 | -0.0003000 0.0000000 |              |              |
| 3344: 45   | 8 38 1 46 8 39 0     | 1312.7084500 | 1312.7084505 |
| -0.0000005 | -0.0003000 0.0000000 |              |              |
| 3345: 44   | 8 37 1 45 8 38 0     | 1312.9762300 | 1312.9758948 |

|            |            |           |              |              |
|------------|------------|-----------|--------------|--------------|
| 0.0003352  | -0.0003000 | 0.0000000 |              |              |
| 3346: 43   | 8 36 1 44  | 8 37 0    | 1313.2434000 | 1313.2432506 |
| 0.0001494  | -0.0003000 | 0.0000000 |              |              |
| 3347: 41   | 8 34 1 42  | 8 35 0    | 1313.7776700 | 1313.7776902 |
| -0.0000202 | -0.0003000 | 0.0000000 |              |              |
| 3348: 40   | 8 33 1 41  | 8 34 0    | 1314.0444200 | 1314.0447706 |
| -0.0003506 | -0.0003000 | 0.0000000 |              |              |
| 3349: 39   | 8 32 1 40  | 8 33 0    | 1314.3117400 | 1314.3117559 |
| -0.0000159 | -0.0003000 | 0.0000000 |              |              |
| 3350: 38   | 8 31 1 39  | 8 32 0    | 1314.5785800 | 1314.5786445 |
| -0.0000645 | -0.0003000 | 0.0000000 |              |              |
| 3351: 37   | 8 30 1 38  | 8 31 0    | 1314.8454600 | 1314.8454348 |
| 0.0000252  | -0.0003000 | 0.0000000 |              |              |
| 3352: 36   | 8 29 1 37  | 8 30 0    | 1315.1119400 | 1315.1121252 |
| -0.0001852 | -0.0003000 | 0.0000000 |              |              |
| 3353: 35   | 8 28 1 36  | 8 29 0    | 1315.3787200 | 1315.3787142 |
| 0.0000058  | -0.0003000 | 0.0000000 |              |              |
| 3354: 34   | 8 27 1 35  | 8 28 0    | 1315.6451000 | 1315.6452002 |
| -0.0001002 | -0.0003000 | 0.0000000 |              |              |
| 3355: 33   | 8 26 1 34  | 8 27 0    | 1315.9114800 | 1315.9115818 |
| -0.0001018 | -0.0003000 | 0.0000000 |              |              |
| 3356: 32   | 8 25 1 33  | 8 26 0    | 1316.1779000 | 1316.1778575 |
| 0.0000425  | -0.0003000 | 0.0000000 |              |              |
| 3357: 31   | 8 24 1 32  | 8 25 0    | 1316.4438700 | 1316.4440258 |
| -0.0001558 | -0.0003000 | 0.0000000 |              |              |
| 3358: 30   | 8 23 1 31  | 8 24 0    | 1316.7101400 | 1316.7100854 |
| 0.0000546  | -0.0003000 | 0.0000000 |              |              |
| 3359: 29   | 8 22 1 30  | 8 23 0    | 1316.9759200 | 1316.9760347 |
| -0.0001147 | -0.0003000 | 0.0000000 |              |              |
| 3360: 28   | 8 21 1 29  | 8 22 0    | 1317.2418800 | 1317.2418725 |
| 0.0000075  | -0.0003000 | 0.0000000 |              |              |
| 3361: 27   | 8 20 1 28  | 8 21 0    | 1317.5074700 | 1317.5075974 |
| -0.0001274 | -0.0003000 | 0.0000000 |              |              |
| 3362: 26   | 8 19 1 27  | 8 20 0    | 1317.7731200 | 1317.7732081 |
| -0.0000881 | -0.0003000 | 0.0000000 |              |              |
| 3363: 25   | 8 18 1 26  | 8 19 0    | 1318.0384000 | 1318.0387032 |
| -0.0003032 | -0.0003000 | 0.0000000 |              |              |
| 3364: 24   | 8 17 1 25  | 8 18 0    | 1318.3041600 | 1318.3040816 |
| 0.0000784  | -0.0003000 | 0.0000000 |              |              |
| 3365: 23   | 8 16 1 24  | 8 17 0    | 1318.5693500 | 1318.5693419 |
| 0.0000081  | -0.0003000 | 0.0000000 |              |              |
| 3366: 22   | 8 15 1 23  | 8 16 0    | 1318.8344100 | 1318.8344830 |
| -0.0000730 | -0.0003000 | 0.0000000 |              |              |
| 3367: 21   | 8 14 1 22  | 8 15 0    | 1319.0997800 | 1319.0995036 |
| 0.0002764  | -0.0003000 | 0.0000000 |              |              |
| 3368: 20   | 8 13 1 21  | 8 14 0    | 1319.3643800 | 1319.3644027 |
| -0.0000227 | -0.0003000 | 0.0000000 |              |              |
| 3369: 19   | 8 12 1 20  | 8 13 0    | 1319.6291100 | 1319.6291790 |
| -0.0000690 | -0.0003000 | 0.0000000 |              |              |
| 3370: 18   | 8 11 1 19  | 8 12 0    | 1319.8939100 | 1319.8938314 |
| 0.0000786  | -0.0003000 | 0.0000000 |              |              |
| 3371: 17   | 8 10 1 18  | 8 11 0    | 1320.1584700 | 1320.1583589 |
| 0.0001111  | -0.0003000 | 0.0000000 |              |              |
| 3372: 16   | 8 9 1 17   | 8 10 0    | 1320.4227100 | 1320.4227605 |
| -0.0000505 | -0.0003000 | 0.0000000 |              |              |
| 3373: 15   | 8 8 1 16   | 8 9 0     | 1320.6871600 | 1320.6870350 |
| 0.0001250  | -0.0003000 | 0.0000000 |              |              |
| 3374: 14   | 8 7 1 15   | 8 8 0     | 1320.9512800 | 1320.9511815 |
| 0.0000985  | -0.0003000 | 0.0000000 |              |              |
| 3375: 13   | 8 6 1 14   | 8 7 0     | 1321.2148700 | 1321.2151991 |
| -0.0003291 | -0.0003000 | 0.0000000 |              |              |
| 3376: 12   | 8 5 1 13   | 8 6 0     | 1321.4791200 | 1321.4790867 |
| 0.0000333  | -0.0003000 | 0.0000000 |              |              |
| 3377: 11   | 8 4 1 12   | 8 5 0     | 1321.7428600 | 1321.7428434 |
| 0.0000166  | -0.0003000 | 0.0000000 |              |              |

|            |            |           |    |   |    |   |    |   |              |              |
|------------|------------|-----------|----|---|----|---|----|---|--------------|--------------|
| 3378:      | 10         | 8         | 3  | 1 | 11 | 8 | 4  | 0 | 1322.0063500 | 1322.0064684 |
| -0.0001184 | -0.0003000 | 0.0000000 |    |   |    |   |    |   |              |              |
| 3379:      | 9          | 8         | 2  | 1 | 10 | 8 | 3  | 0 | 1322.2699600 | 1322.2699607 |
| -0.0000007 | -0.0003000 | 0.0000000 |    |   |    |   |    |   |              |              |
| 3380:      | 9          | 8         | 2  | 1 | 8  | 8 | 1  | 0 | 1327.2501300 | 1327.2501424 |
| -0.0000124 | -0.0003000 | 0.0000000 |    |   |    |   |    |   |              |              |
| 3381:      | 10         | 8         | 3  | 1 | 9  | 8 | 2  | 0 | 1327.5107400 | 1327.5108376 |
| -0.0000976 | -0.0003000 | 0.0000000 |    |   |    |   |    |   |              |              |
| 3382:      | 11         | 8         | 4  | 1 | 10 | 8 | 3  | 0 | 1327.7713400 | 1327.7713875 |
| -0.0000475 | -0.0003000 | 0.0000000 |    |   |    |   |    |   |              |              |
| 3383:      | 12         | 8         | 5  | 1 | 11 | 8 | 4  | 0 | 1328.0319900 | 1328.0317916 |
| 0.0001984  | -0.0003000 | 0.0000000 |    |   |    |   |    |   |              |              |
| 3384:      | 13         | 8         | 6  | 1 | 12 | 8 | 5  | 0 | 1328.2919700 | 1328.2920497 |
| -0.0000797 | -0.0003000 | 0.0000000 |    |   |    |   |    |   |              |              |
| 3385:      | 14         | 8         | 7  | 1 | 13 | 8 | 6  | 0 | 1328.5521700 | 1328.5521613 |
| 0.0000087  | -0.0003000 | 0.0000000 |    |   |    |   |    |   |              |              |
| 3386:      | 15         | 8         | 8  | 1 | 14 | 8 | 7  | 0 | 1328.8121800 | 1328.8121263 |
| 0.0000537  | -0.0003000 | 0.0000000 |    |   |    |   |    |   |              |              |
| 3387:      | 16         | 8         | 9  | 1 | 15 | 8 | 8  | 0 | 1329.0719200 | 1329.0719442 |
| -0.0000242 | -0.0003000 | 0.0000000 |    |   |    |   |    |   |              |              |
| 3388:      | 17         | 8         | 10 | 1 | 16 | 8 | 9  | 0 | 1329.3314900 | 1329.3316149 |
| -0.0001249 | -0.0003000 | 0.0000000 |    |   |    |   |    |   |              |              |
| 3389:      | 18         | 8         | 11 | 1 | 17 | 8 | 10 | 0 | 1329.5910200 | 1329.5911380 |
| -0.0001180 | -0.0003000 | 0.0000000 |    |   |    |   |    |   |              |              |
| 3390:      | 19         | 8         | 12 | 1 | 18 | 8 | 11 | 0 | 1329.8505100 | 1329.8505132 |
| -0.0000032 | -0.0003000 | 0.0000000 |    |   |    |   |    |   |              |              |
| 3391:      | 20         | 8         | 13 | 1 | 19 | 8 | 12 | 0 | 1330.1099100 | 1330.1097404 |
| 0.0001696  | -0.0003000 | 0.0000000 |    |   |    |   |    |   |              |              |
| 3392:      | 21         | 8         | 14 | 1 | 20 | 8 | 13 | 0 | 1330.3689800 | 1330.3688193 |
| 0.0001607  | -0.0003000 | 0.0000000 |    |   |    |   |    |   |              |              |
| 3393:      | 22         | 8         | 15 | 1 | 21 | 8 | 14 | 0 | 1330.6280200 | 1330.6277498 |
| 0.0002702  | -0.0003000 | 0.0000000 |    |   |    |   |    |   |              |              |
| 3394:      | 23         | 8         | 16 | 1 | 22 | 8 | 15 | 0 | 1330.8863700 | 1330.8865315 |
| -0.0001615 | -0.0003000 | 0.0000000 |    |   |    |   |    |   |              |              |
| 3395:      | 24         | 8         | 17 | 1 | 23 | 8 | 16 | 0 | 1331.1450800 | 1331.1451644 |
| -0.0000844 | -0.0003000 | 0.0000000 |    |   |    |   |    |   |              |              |
| 3396:      | 25         | 8         | 18 | 1 | 24 | 8 | 17 | 0 | 1331.4033300 | 1331.4036483 |
| -0.0003183 | -0.0003000 | 0.0000000 |    |   |    |   |    |   |              |              |
| 3397:      | 26         | 8         | 19 | 1 | 25 | 8 | 18 | 0 | 1331.6616000 | 1331.6619830 |
| -0.0003830 | -0.0003000 | 0.0000000 |    |   |    |   |    |   |              |              |
| 3398:      | 27         | 8         | 20 | 1 | 26 | 8 | 19 | 0 | 1331.9204500 | 1331.9201684 |
| 0.0002816  | -0.0003000 | 0.0000000 |    |   |    |   |    |   |              |              |
| 3399:      | 28         | 8         | 21 | 1 | 27 | 8 | 20 | 0 | 1332.1784200 | 1332.1782044 |
| 0.0002156  | -0.0003000 | 0.0000000 |    |   |    |   |    |   |              |              |
| 3400:      | 29         | 8         | 22 | 1 | 28 | 8 | 21 | 0 | 1332.4361900 | 1332.4360908 |
| 0.0000992  | -0.0003000 | 0.0000000 |    |   |    |   |    |   |              |              |
| 3401:      | 30         | 8         | 23 | 1 | 29 | 8 | 22 | 0 | 1332.6939500 | 1332.6938276 |
| 0.0001224  | -0.0003000 | 0.0000000 |    |   |    |   |    |   |              |              |
| 3402:      | 31         | 8         | 24 | 1 | 30 | 8 | 23 | 0 | 1332.9513200 | 1332.9514148 |
| -0.0000948 | -0.0003000 | 0.0000000 |    |   |    |   |    |   |              |              |
| 3403:      | 32         | 8         | 25 | 1 | 31 | 8 | 24 | 0 | 1333.2087300 | 1333.2088521 |
| -0.0001221 | -0.0003000 | 0.0000000 |    |   |    |   |    |   |              |              |
| 3404:      | 33         | 8         | 26 | 1 | 32 | 8 | 25 | 0 | 1333.4661700 | 1333.4661397 |
| 0.0000303  | -0.0003000 | 0.0000000 |    |   |    |   |    |   |              |              |
| 3405:      | 34         | 8         | 27 | 1 | 33 | 8 | 26 | 0 | 1333.7232400 | 1333.7232774 |
| -0.0000374 | -0.0003000 | 0.0000000 |    |   |    |   |    |   |              |              |
| 3406:      | 35         | 8         | 28 | 1 | 34 | 8 | 27 | 0 | 1333.9805000 | 1333.9802652 |
| 0.0002348  | -0.0003000 | 0.0000000 |    |   |    |   |    |   |              |              |
| 3407:      | 36         | 8         | 29 | 1 | 35 | 8 | 28 | 0 | 1334.2369800 | 1334.2371031 |
| -0.0001231 | -0.0003000 | 0.0000000 |    |   |    |   |    |   |              |              |
| 3408:      | 37         | 8         | 30 | 1 | 36 | 8 | 29 | 0 | 1334.4938000 | 1334.4937912 |
| 0.0000088  | -0.0003000 | 0.0000000 |    |   |    |   |    |   |              |              |
| 3409:      | 38         | 8         | 31 | 1 | 37 | 8 | 30 | 0 | 1334.7505000 | 1334.7503294 |
| 0.0001706  | -0.0003000 | 0.0000000 |    |   |    |   |    |   |              |              |
| 3410:      | 39         | 8         | 32 | 1 | 38 | 8 | 31 | 0 | 1335.0067600 | 1335.0067179 |

|            |                  |           |              |              |
|------------|------------------|-----------|--------------|--------------|
| 0.0000421  | -0.0003000       | 0.0000000 |              |              |
| 3411: 40   | 8 33 1 39 8 32 0 |           | 1335.2630200 | 1335.2629566 |
| 0.0000634  | -0.0003000       | 0.0000000 |              |              |
| 3412: 41   | 8 34 1 40 8 33 0 |           | 1335.5190600 | 1335.5190456 |
| 0.0000144  | -0.0003000       | 0.0000000 |              |              |
| 3413: 42   | 8 35 1 41 8 34 0 |           | 1335.7749900 | 1335.7749851 |
| 0.0000049  | -0.0003000       | 0.0000000 |              |              |
| 3414: 43   | 8 36 1 42 8 35 0 |           | 1336.0308200 | 1336.0307751 |
| 0.0000449  | -0.0003000       | 0.0000000 |              |              |
| 3415: 44   | 8 37 1 43 8 36 0 |           | 1336.2864500 | 1336.2864158 |
| 0.0000342  | -0.0003000       | 0.0000000 |              |              |
| 3416: 45   | 8 38 1 44 8 37 0 |           | 1336.5418100 | 1336.5419073 |
| -0.0000973 | -0.0003000       | 0.0000000 |              |              |
| 3417: 46   | 8 39 1 45 8 38 0 |           | 1336.7972300 | 1336.7972499 |
| -0.0000199 | -0.0003000       | 0.0000000 |              |              |
| 3418: 47   | 8 40 1 46 8 39 0 |           | 1337.0526000 | 1337.0524436 |
| 0.0001564  | -0.0003000       | 0.0000000 |              |              |
| 3419: 48   | 8 41 1 47 8 40 0 |           | 1337.3077000 | 1337.3074887 |
| 0.0002113  | -0.0003000       | 0.0000000 |              |              |
| 3420: 49   | 8 42 1 48 8 41 0 |           | 1337.5623900 | 1337.5623855 |
| 0.0000045  | -0.0003000       | 0.0000000 |              |              |
| 3421: 50   | 8 43 1 49 8 42 0 |           | 1337.8171400 | 1337.8171342 |
| 0.0000058  | -0.0003000       | 0.0000000 |              |              |
| 3422: 51   | 8 44 1 50 8 43 0 |           | 1338.0716300 | 1338.0717351 |
| -0.0001051 | -0.0003000       | 0.0000000 |              |              |
| 3423: 52   | 8 45 1 51 8 44 0 |           | 1338.3265100 | 1338.3261885 |
| 0.0003215  | -0.0003000       | 0.0000000 |              |              |
| 3424: 53   | 8 46 1 52 8 45 0 |           | 1338.5804800 | 1338.5804947 |
| -0.0000147 | -0.0003000       | 0.0000000 |              |              |
| 3425: 54   | 8 47 1 53 8 46 0 |           | 1338.8346500 | 1338.8346540 |
| -0.0000040 | -0.0003000       | 0.0000000 |              |              |
| 3426: 55   | 8 48 1 54 8 47 0 |           | 1339.0885200 | 1339.0886668 |
| -0.0001468 | -0.0003000       | 0.0000000 |              |              |
| 3427: 56   | 8 49 1 55 8 48 0 |           | 1339.3425400 | 1339.3425336 |
| 0.0000064  | -0.0003000       | 0.0000000 |              |              |
| 3428: 57   | 8 50 1 56 8 49 0 |           | 1339.5965000 | 1339.5962546 |
| 0.0002454  | -0.0003000       | 0.0000000 |              |              |
| 3429: 58   | 8 51 1 57 8 50 0 |           | 1339.8499500 | 1339.8498303 |
| 0.0001197  | -0.0003000       | 0.0000000 |              |              |
| 3430: 59   | 8 52 1 58 8 51 0 |           | 1340.1032900 | 1340.1032611 |
| 0.0000289  | -0.0003000       | 0.0000000 |              |              |
| 3431: 60   | 8 53 1 59 8 52 0 |           | 1340.3565500 | 1340.3565474 |
| 0.0000026  | -0.0003000       | 0.0000000 |              |              |
| 3432: 61   | 8 54 1 60 8 53 0 |           | 1340.6097900 | 1340.6096896 |
| 0.0001004  | -0.0003000       | 0.0000000 |              |              |
| 3433: 62   | 8 55 1 61 8 54 0 |           | 1340.8627000 | 1340.8626881 |
| 0.0000119  | -0.0003000       | 0.0000000 |              |              |
| 3434: 63   | 8 56 1 62 8 55 0 |           | 1341.1156300 | 1341.1155432 |
| 0.0000868  | -0.0003000       | 0.0000000 |              |              |
| 3435: 64   | 8 57 1 63 8 56 0 |           | 1341.3683200 | 1341.3682553 |
| 0.0000647  | -0.0003000       | 0.0000000 |              |              |
| 3436: 65   | 8 58 1 64 8 57 0 |           | 1341.6208400 | 1341.6208247 |
| 0.0000153  | -0.0003000       | 0.0000000 |              |              |
| 3437: 66   | 8 59 1 65 8 58 0 |           | 1341.8734400 | 1341.8732515 |
| 0.0001885  | -0.0003000       | 0.0000000 |              |              |
| 3438: 67   | 8 60 1 66 8 59 0 |           | 1342.1257300 | 1342.1255359 |
| 0.0001941  | -0.0003000       | 0.0000000 |              |              |
| 3439: 68   | 8 61 1 67 8 60 0 |           | 1342.3779700 | 1342.3776779 |
| 0.0002921  | -0.0003000       | 0.0000000 |              |              |
| 3440: 69   | 8 62 1 68 8 61 0 |           | 1342.6300300 | 1342.6296774 |
| 0.0003526  | -0.0003000       | 0.0000000 |              |              |
| 3441: 78   | 8 71 1 77 8 70 0 |           | 1344.8907500 | 1344.8911411 |
| -0.0003911 | -0.0003000       | 0.0000000 |              |              |
| 3442: 79   | 8 72 1 78 8 71 0 |           | 1345.1415300 | 1345.1416587 |
| -0.0001287 | -0.0003000       | 0.0000000 |              |              |

|            |            |           |      |   |              |              |
|------------|------------|-----------|------|---|--------------|--------------|
| 3443: 80   | 8 73       | 1 79      | 8 72 | 0 | 1345.3918500 | 1345.3920142 |
| -0.0001642 | -0.0003000 | 0.0000000 |      |   |              |              |
| 3444: 81   | 8 74       | 1 80      | 8 73 | 0 | 1345.6419800 | 1345.6422029 |
| -0.0002229 | -0.0003000 | 0.0000000 |      |   |              |              |
| 3445: 83   | 8 76       | 1 82      | 8 75 | 0 | 1346.1420000 | 1346.1420570 |
| -0.0000570 | -0.0003000 | 0.0000000 |      |   |              |              |
| 3446: 84   | 8 77       | 1 83      | 8 76 | 0 | 1346.3918600 | 1346.3917091 |
| 0.0001509  | -0.0003000 | 0.0000000 |      |   |              |              |
| 3447: 85   | 8 78       | 1 84      | 8 77 | 0 | 1346.6413600 | 1346.6411673 |
| 0.0001927  | -0.0003000 | 0.0000000 |      |   |              |              |
| 3448: 86   | 8 79       | 1 85      | 8 78 | 0 | 1346.8912200 | 1346.8904225 |
| 0.0007975  | -0.0003000 | 0.0000000 |      |   |              |              |
| 3449: 87   | 8 80       | 1 86      | 8 79 | 0 | 1347.1394600 | 1347.1394645 |
| -0.0000045 | -0.0003000 | 0.0000000 |      |   |              |              |
| 3450: 88   | 8 81       | 1 87      | 8 80 | 0 | 1347.3880400 | 1347.3882818 |
| -0.0002418 | -0.0003000 | 0.0000000 |      |   |              |              |
| 3451: 89   | 8 82       | 1 88      | 8 81 | 0 | 1347.6361400 | 1347.6368619 |
| -0.0007219 | -0.0003000 | 0.0000000 |      |   |              |              |
| 3452: 90   | 8 83       | 1 89      | 8 82 | 0 | 1347.8852500 | 1347.8851908 |
| 0.0000592  | -0.0003000 | 0.0000000 |      |   |              |              |
| 3453: 85   | 9 76       | 1 86      | 9 77 | 0 | 1301.7969400 | 1301.7973391 |
| -0.0003991 | -0.0003000 | 0.0000000 |      |   |              |              |
| 3454: 84   | 9 75       | 1 85      | 9 76 | 0 | 1302.0659700 | 1302.0662495 |
| -0.0002795 | -0.0003000 | 0.0000000 |      |   |              |              |
| 3455: 83   | 9 74       | 1 84      | 9 75 | 0 | 1302.3358300 | 1302.3351570 |
| 0.0006730  | -0.0003000 | 0.0000000 |      |   |              |              |
| 3456: 82   | 9 73       | 1 83      | 9 74 | 0 | 1302.6040000 | 1302.6040595 |
| -0.0000595 | -0.0003000 | 0.0000000 |      |   |              |              |
| 3457: 81   | 9 72       | 1 82      | 9 73 | 0 | 1302.8733000 | 1302.8729554 |
| 0.0003446  | -0.0003000 | 0.0000000 |      |   |              |              |
| 3458: 80   | 9 71       | 1 81      | 9 72 | 0 | 1303.1417600 | 1303.1418426 |
| -0.0000826 | -0.0003000 | 0.0000000 |      |   |              |              |
| 3459: 79   | 9 70       | 1 80      | 9 71 | 0 | 1303.4104800 | 1303.4107192 |
| -0.0002392 | -0.0003000 | 0.0000000 |      |   |              |              |
| 3460: 78   | 9 69       | 1 79      | 9 70 | 0 | 1303.6793300 | 1303.6795833 |
| -0.0002533 | -0.0003000 | 0.0000000 |      |   |              |              |
| 3461: 76   | 9 67       | 1 77      | 9 68 | 0 | 1304.2169900 | 1304.2172659 |
| -0.0002759 | -0.0003000 | 0.0000000 |      |   |              |              |
| 3462: 75   | 9 66       | 1 76      | 9 67 | 0 | 1304.4859100 | 1304.4860805 |
| -0.0001705 | -0.0003000 | 0.0000000 |      |   |              |              |
| 3463: 74   | 9 65       | 1 75      | 9 66 | 0 | 1304.7543400 | 1304.7548745 |
| -0.0005345 | -0.0003000 | 0.0000000 |      |   |              |              |
| 3464: 73   | 9 64       | 1 74      | 9 65 | 0 | 1305.0236500 | 1305.0236460 |
| 0.0000040  | -0.0003000 | 0.0000000 |      |   |              |              |
| 3465: 72   | 9 63       | 1 73      | 9 64 | 0 | 1305.2924500 | 1305.2923929 |
| 0.0000571  | -0.0003000 | 0.0000000 |      |   |              |              |
| 3466: 71   | 9 62       | 1 72      | 9 63 | 0 | 1305.5610300 | 1305.5611132 |
| -0.0000832 | -0.0003000 | 0.0000000 |      |   |              |              |
| 3467: 70   | 9 61       | 1 71      | 9 62 | 0 | 1305.8298000 | 1305.8298048 |
| -0.0000048 | -0.0003000 | 0.0000000 |      |   |              |              |
| 3468: 69   | 9 60       | 1 70      | 9 61 | 0 | 1306.0984100 | 1306.0984658 |
| -0.0000558 | -0.0003000 | 0.0000000 |      |   |              |              |
| 3469: 68   | 9 59       | 1 69      | 9 60 | 0 | 1306.3672600 | 1306.3670941 |
| 0.0001659  | -0.0003000 | 0.0000000 |      |   |              |              |
| 3470: 67   | 9 58       | 1 68      | 9 59 | 0 | 1306.6356900 | 1306.6356877 |
| 0.0000023  | -0.0003000 | 0.0000000 |      |   |              |              |
| 3471: 66   | 9 57       | 1 67      | 9 58 | 0 | 1306.9045200 | 1306.9042444 |
| 0.0002756  | -0.0003000 | 0.0000000 |      |   |              |              |
| 3472: 65   | 9 56       | 1 66      | 9 57 | 0 | 1307.1726700 | 1307.1727624 |
| -0.0000924 | -0.0003000 | 0.0000000 |      |   |              |              |
| 3473: 64   | 9 55       | 1 65      | 9 56 | 0 | 1307.4412500 | 1307.4412396 |
| 0.0000104  | -0.0003000 | 0.0000000 |      |   |              |              |
| 3474: 63   | 9 54       | 1 64      | 9 55 | 0 | 1307.7096900 | 1307.7096739 |
| 0.0000161  | -0.0003000 | 0.0000000 |      |   |              |              |
| 3475: 62   | 9 53       | 1 63      | 9 54 | 0 | 1307.9779500 | 1307.9780634 |

|            |            |           |              |              |
|------------|------------|-----------|--------------|--------------|
| -0.0001134 | -0.0003000 | 0.0000000 |              |              |
| 3476: 61   | 9 52 1 62  | 9 53 0    | 1308.2464000 | 1308.2464061 |
| -0.0000061 | -0.0003000 | 0.0000000 |              |              |
| 3477: 60   | 9 51 1 61  | 9 52 0    | 1308.5146600 | 1308.5147000 |
| -0.0000400 | -0.0003000 | 0.0000000 |              |              |
| 3478: 59   | 9 50 1 60  | 9 51 0    | 1308.7828800 | 1308.7829430 |
| -0.0000630 | -0.0003000 | 0.0000000 |              |              |
| 3479: 58   | 9 49 1 59  | 9 50 0    | 1309.0509800 | 1309.0511333 |
| -0.0001533 | -0.0003000 | 0.0000000 |              |              |
| 3480: 57   | 9 48 1 58  | 9 49 0    | 1309.3192100 | 1309.3192689 |
| -0.0000589 | -0.0003000 | 0.0000000 |              |              |
| 3481: 56   | 9 47 1 57  | 9 48 0    | 1309.5874300 | 1309.5873479 |
| 0.0000821  | -0.0003000 | 0.0000000 |              |              |
| 3482: 55   | 9 46 1 56  | 9 47 0    | 1309.8553300 | 1309.8553682 |
| -0.0000382 | -0.0003000 | 0.0000000 |              |              |
| 3483: 54   | 9 45 1 55  | 9 46 0    | 1310.1232500 | 1310.1233281 |
| -0.0000781 | -0.0003000 | 0.0000000 |              |              |
| 3484: 53   | 9 44 1 54  | 9 45 0    | 1310.3913500 | 1310.3912255 |
| 0.0001245  | -0.0003000 | 0.0000000 |              |              |
| 3485: 52   | 9 43 1 53  | 9 44 0    | 1310.6588300 | 1310.6590587 |
| -0.0002287 | -0.0003000 | 0.0000000 |              |              |
| 3486: 51   | 9 42 1 52  | 9 43 0    | 1310.9266200 | 1310.9268256 |
| -0.0002056 | -0.0003000 | 0.0000000 |              |              |
| 3487: 50   | 9 41 1 51  | 9 42 0    | 1311.1945500 | 1311.1945245 |
| 0.0000255  | -0.0003000 | 0.0000000 |              |              |
| 3488: 49   | 9 40 1 50  | 9 41 0    | 1311.4621100 | 1311.4621535 |
| -0.0000435 | -0.0003000 | 0.0000000 |              |              |
| 3489: 48   | 9 39 1 49  | 9 40 0    | 1311.7298600 | 1311.7297108 |
| 0.0001492  | -0.0003000 | 0.0000000 |              |              |
| 3490: 47   | 9 38 1 48  | 9 39 0    | 1311.9973300 | 1311.9971945 |
| 0.0001355  | -0.0003000 | 0.0000000 |              |              |
| 3491: 46   | 9 37 1 47  | 9 38 0    | 1312.2647700 | 1312.2646029 |
| 0.0001671  | -0.0003000 | 0.0000000 |              |              |
| 3492: 45   | 9 36 1 46  | 9 37 0    | 1312.5320800 | 1312.5319342 |
| 0.0001458  | -0.0003000 | 0.0000000 |              |              |
| 3493: 44   | 9 35 1 45  | 9 36 0    | 1312.7993500 | 1312.7991865 |
| 0.0001635  | -0.0003000 | 0.0000000 |              |              |
| 3494: 43   | 9 34 1 44  | 9 35 0    | 1313.0666900 | 1313.0663582 |
| 0.0003318  | -0.0003000 | 0.0000000 |              |              |
| 3495: 42   | 9 33 1 43  | 9 34 0    | 1313.3336100 | 1313.3334475 |
| 0.0001625  | -0.0003000 | 0.0000000 |              |              |
| 3496: 41   | 9 32 1 42  | 9 33 0    | 1313.6005500 | 1313.6004527 |
| 0.0000973  | -0.0003000 | 0.0000000 |              |              |
| 3497: 40   | 9 31 1 41  | 9 32 0    | 1313.8673300 | 1313.8673721 |
| -0.0000421 | -0.0003000 | 0.0000000 |              |              |
| 3498: 39   | 9 30 1 40  | 9 31 0    | 1314.1341500 | 1314.1342039 |
| -0.0000539 | -0.0003000 | 0.0000000 |              |              |
| 3499: 38   | 9 29 1 39  | 9 30 0    | 1314.4008800 | 1314.4009466 |
| -0.0000666 | -0.0003000 | 0.0000000 |              |              |
| 3500: 37   | 9 28 1 38  | 9 29 0    | 1314.6675200 | 1314.6675985 |
| -0.0000785 | -0.0003000 | 0.0000000 |              |              |
| 3501: 36   | 9 27 1 37  | 9 28 0    | 1314.9340800 | 1314.9341579 |
| -0.0000779 | -0.0003000 | 0.0000000 |              |              |
| 3502: 35   | 9 26 1 36  | 9 27 0    | 1315.2005200 | 1315.2006232 |
| -0.0001032 | -0.0003000 | 0.0000000 |              |              |
| 3503: 34   | 9 25 1 35  | 9 26 0    | 1315.4668800 | 1315.4669929 |
| -0.0001129 | -0.0003000 | 0.0000000 |              |              |
| 3504: 33   | 9 24 1 34  | 9 25 0    | 1315.7331800 | 1315.7332653 |
| -0.0000853 | -0.0003000 | 0.0000000 |              |              |
| 3505: 32   | 9 23 1 33  | 9 24 0    | 1315.9993500 | 1315.9994390 |
| -0.0000890 | -0.0003000 | 0.0000000 |              |              |
| 3506: 31   | 9 22 1 32  | 9 23 0    | 1316.2654900 | 1316.2655123 |
| -0.0000223 | -0.0003000 | 0.0000000 |              |              |
| 3507: 30   | 9 21 1 31  | 9 22 0    | 1316.5313600 | 1316.5314837 |
| -0.0001237 | -0.0003000 | 0.0000000 |              |              |

|                                 |              |              |
|---------------------------------|--------------|--------------|
| 3508: 29 9 20 1 30 9 21 0       | 1316.7973400 | 1316.7973518 |
| -0.0000118 -0.0003000 0.0000000 |              |              |
| 3509: 28 9 19 1 29 9 20 0       | 1317.0630600 | 1317.0631151 |
| -0.0000551 -0.0003000 0.0000000 |              |              |
| 3510: 27 9 18 1 28 9 19 0       | 1317.3288600 | 1317.3287720 |
| 0.0000880 -0.0003000 0.0000000  |              |              |
| 3511: 26 9 17 1 27 9 18 0       | 1317.5943900 | 1317.5943213 |
| 0.0000687 -0.0003000 0.0000000  |              |              |
| 3512: 25 9 16 1 26 9 17 0       | 1317.8597900 | 1317.8597613 |
| 0.0000287 -0.0003000 0.0000000  |              |              |
| 3513: 23 9 14 1 24 9 15 0       | 1318.3904000 | 1318.3903084 |
| 0.0000916 -0.0003000 0.0000000  |              |              |
| 3514: 22 9 13 1 23 9 14 0       | 1318.6554000 | 1318.6554126 |
| -0.0000126 -0.0003000 0.0000000 |              |              |
| 3515: 21 9 12 1 22 9 13 0       | 1318.9202300 | 1318.9204022 |
| -0.0001722 -0.0003000 0.0000000 |              |              |
| 3516: 20 9 11 1 21 9 12 0       | 1319.1850700 | 1319.1852758 |
| -0.0002058 -0.0003000 0.0000000 |              |              |
| 3517: 19 9 10 1 20 9 11 0       | 1319.4499500 | 1319.4500321 |
| -0.0000821 -0.0003000 0.0000000 |              |              |
| 3518: 18 9 9 1 19 9 10 0        | 1319.7145600 | 1319.7146699 |
| -0.0001099 -0.0003000 0.0000000 |              |              |
| 3519: 17 9 8 1 18 9 9 0         | 1319.9791800 | 1319.9791878 |
| -0.0000078 -0.0003000 0.0000000 |              |              |
| 3520: 16 9 7 1 17 9 8 0         | 1320.2435300 | 1320.2435847 |
| -0.0000547 -0.0003000 0.0000000 |              |              |
| 3521: 15 9 6 1 16 9 7 0         | 1320.5078700 | 1320.5078593 |
| 0.0000107 -0.0003000 0.0000000  |              |              |
| 3522: 14 9 5 1 15 9 6 0         | 1320.7721400 | 1320.7720104 |
| 0.0001296 -0.0003000 0.0000000  |              |              |
| 3523: 13 9 4 1 14 9 5 0         | 1321.0360200 | 1321.0360368 |
| -0.0000168 -0.0003000 0.0000000 |              |              |
| 3524: 12 9 3 1 13 9 4 0         | 1321.2999600 | 1321.2999373 |
| 0.0000227 -0.0003000 0.0000000  |              |              |
| 3525: 11 9 2 1 12 9 3 0         | 1321.5635800 | 1321.5637109 |
| -0.0001309 -0.0003000 0.0000000 |              |              |
| 3526: 10 9 1 1 11 9 2 0         | 1321.8270900 | 1321.8273563 |
| -0.0002663 -0.0003000 0.0000000 |              |              |
| 3527: 9 9 0 1 10 9 1 0          | 1322.0906600 | 1322.0908725 |
| -0.0002125 -0.0003000 0.0000000 |              |              |
| 3528: 10 9 1 1 9 9 0 0          | 1327.3326600 | 1327.3325118 |
| 0.0001482 -0.0003000 0.0000000  |              |              |
| 3529: 11 9 2 1 10 9 1 0         | 1327.5931300 | 1327.5930896 |
| 0.0000404 -0.0003000 0.0000000  |              |              |
| 3530: 12 9 3 1 11 9 2 0         | 1327.8535700 | 1327.8535182 |
| 0.0000518 -0.0003000 0.0000000  |              |              |
| 3531: 13 9 4 1 12 9 3 0         | 1328.1138300 | 1328.1137968 |
| 0.0000332 -0.0003000 0.0000000  |              |              |
| 3532: 14 9 5 1 13 9 4 0         | 1328.3740700 | 1328.3739246 |
| 0.0001454 -0.0003000 0.0000000  |              |              |
| 3533: 15 9 6 1 14 9 5 0         | 1328.6340200 | 1328.6339011 |
| 0.0001189 -0.0003000 0.0000000  |              |              |
| 3534: 16 9 7 1 15 9 6 0         | 1328.8938300 | 1328.8937253 |
| 0.0001047 -0.0003000 0.0000000  |              |              |
| 3535: 17 9 8 1 16 9 7 0         | 1329.1534100 | 1329.1533968 |
| 0.0000132 -0.0003000 0.0000000  |              |              |
| 3536: 18 9 9 1 17 9 8 0         | 1329.4128900 | 1329.4129147 |
| -0.0000247 -0.0003000 0.0000000 |              |              |
| 3537: 19 9 10 1 18 9 9 0        | 1329.6721200 | 1329.6722784 |
| -0.0001584 -0.0003000 0.0000000 |              |              |
| 3538: 20 9 11 1 19 9 10 0       | 1329.9315300 | 1329.9314873 |
| 0.0000427 -0.0003000 0.0000000  |              |              |
| 3539: 21 9 12 1 20 9 11 0       | 1330.1904900 | 1330.1905406 |
| -0.0000506 -0.0003000 0.0000000 |              |              |
| 3540: 22 9 13 1 21 9 12 0       | 1330.4494700 | 1330.4494379 |

|            |            |           |              |              |
|------------|------------|-----------|--------------|--------------|
| 0.0000321  | -0.0003000 | 0.0000000 |              |              |
| 3541: 23   | 9 14 1 22  | 9 13 0    | 1330.7081200 | 1330.7081783 |
| -0.0000583 | -0.0003000 | 0.0000000 |              |              |
| 3542: 24   | 9 15 1 23  | 9 14 0    | 1330.9670400 | 1330.9667614 |
| 0.0002786  | -0.0003000 | 0.0000000 |              |              |
| 3543: 25   | 9 16 1 24  | 9 15 0    | 1331.2252300 | 1331.2251864 |
| 0.0000436  | -0.0003000 | 0.0000000 |              |              |
| 3544: 26   | 9 17 1 25  | 9 16 0    | 1331.4831800 | 1331.4834528 |
| -0.0002728 | -0.0003000 | 0.0000000 |              |              |
| 3545: 27   | 9 18 1 26  | 9 17 0    | 1331.7417900 | 1331.7415599 |
| 0.0002301  | -0.0003000 | 0.0000000 |              |              |
| 3546: 28   | 9 19 1 27  | 9 18 0    | 1331.9994300 | 1331.9995073 |
| -0.0000773 | -0.0003000 | 0.0000000 |              |              |
| 3547: 29   | 9 20 1 28  | 9 19 0    | 1332.2572600 | 1332.2572943 |
| -0.0000343 | -0.0003000 | 0.0000000 |              |              |
| 3548: 30   | 9 21 1 29  | 9 20 0    | 1332.5148900 | 1332.5149203 |
| -0.0000303 | -0.0003000 | 0.0000000 |              |              |
| 3549: 31   | 9 22 1 30  | 9 21 0    | 1332.7723300 | 1332.7723847 |
| -0.0000547 | -0.0003000 | 0.0000000 |              |              |
| 3550: 32   | 9 23 1 31  | 9 22 0    | 1333.0298800 | 1333.0296871 |
| 0.0001929  | -0.0003000 | 0.0000000 |              |              |
| 3551: 33   | 9 24 1 32  | 9 23 0    | 1333.2868200 | 1333.2868267 |
| -0.0000067 | -0.0003000 | 0.0000000 |              |              |
| 3552: 34   | 9 25 1 33  | 9 24 0    | 1333.5438000 | 1333.5438032 |
| -0.0000032 | -0.0003000 | 0.0000000 |              |              |
| 3553: 35   | 9 26 1 34  | 9 25 0    | 1333.8006100 | 1333.8006160 |
| -0.0000060 | -0.0003000 | 0.0000000 |              |              |
| 3554: 36   | 9 27 1 35  | 9 26 0    | 1334.0572700 | 1334.0572645 |
| 0.0000055  | -0.0003000 | 0.0000000 |              |              |
| 3555: 37   | 9 28 1 36  | 9 27 0    | 1334.3137900 | 1334.3137481 |
| 0.0000419  | -0.0003000 | 0.0000000 |              |              |
| 3556: 38   | 9 29 1 37  | 9 28 0    | 1334.5701900 | 1334.5700665 |
| 0.0001235  | -0.0003000 | 0.0000000 |              |              |
| 3557: 39   | 9 30 1 38  | 9 29 0    | 1334.8261500 | 1334.8262190 |
| -0.0000690 | -0.0003000 | 0.0000000 |              |              |
| 3558: 40   | 9 31 1 39  | 9 30 0    | 1335.0821100 | 1335.0822052 |
| -0.0000952 | -0.0003000 | 0.0000000 |              |              |
| 3559: 41   | 9 32 1 40  | 9 31 0    | 1335.3381800 | 1335.3380245 |
| 0.0001555  | -0.0003000 | 0.0000000 |              |              |
| 3560: 42   | 9 33 1 41  | 9 32 0    | 1335.5934300 | 1335.5936765 |
| -0.0002465 | -0.0003000 | 0.0000000 |              |              |
| 3561: 43   | 9 34 1 42  | 9 33 0    | 1335.8491500 | 1335.8491607 |
| -0.0000107 | -0.0003000 | 0.0000000 |              |              |
| 3562: 44   | 9 35 1 43  | 9 34 0    | 1336.1044700 | 1336.1044766 |
| -0.0000066 | -0.0003000 | 0.0000000 |              |              |
| 3563: 45   | 9 36 1 44  | 9 35 0    | 1336.3596900 | 1336.3596238 |
| 0.0000662  | -0.0003000 | 0.0000000 |              |              |
| 3564: 46   | 9 37 1 45  | 9 36 0    | 1336.6145500 | 1336.6146017 |
| -0.0000517 | -0.0003000 | 0.0000000 |              |              |
| 3565: 47   | 9 38 1 46  | 9 37 0    | 1336.8691600 | 1336.8694100 |
| -0.0002500 | -0.0003000 | 0.0000000 |              |              |
| 3566: 48   | 9 39 1 47  | 9 38 0    | 1337.1239400 | 1337.1240481 |
| -0.0001081 | -0.0003000 | 0.0000000 |              |              |
| 3567: 49   | 9 40 1 48  | 9 39 0    | 1337.3788400 | 1337.3785158 |
| 0.0003242  | -0.0003000 | 0.0000000 |              |              |
| 3568: 50   | 9 41 1 49  | 9 40 0    | 1337.6327900 | 1337.6328124 |
| -0.0000224 | -0.0003000 | 0.0000000 |              |              |
| 3569: 51   | 9 42 1 50  | 9 41 0    | 1337.8864500 | 1337.8869376 |
| -0.0004876 | -0.0003000 | 0.0000000 |              |              |
| 3570: 55   | 9 46 1 54  | 9 45 0    | 1338.9017800 | 1338.9017170 |
| 0.0000630  | -0.0003000 | 0.0000000 |              |              |
| 3571: 56   | 9 47 1 55  | 9 46 0    | 1339.1547600 | 1339.1549796 |
| -0.0002196 | -0.0003000 | 0.0000000 |              |              |
| 3572: 57   | 9 48 1 56  | 9 47 0    | 1339.4078400 | 1339.4080686 |
| -0.0002286 | -0.0003000 | 0.0000000 |              |              |

|            |                      |              |              |
|------------|----------------------|--------------|--------------|
| 3573: 58   | 9 49 1 57 9 48 0     | 1339.6608900 | 1339.6609837 |
| -0.0000937 | -0.0003000 0.0000000 |              |              |
| 3574: 59   | 9 50 1 58 9 49 0     | 1339.9137700 | 1339.9137246 |
| 0.0000454  | -0.0003000 0.0000000 |              |              |
| 3575: 60   | 9 51 1 59 9 50 0     | 1340.1662500 | 1340.1662911 |
| -0.0000411 | -0.0003000 0.0000000 |              |              |
| 3576: 62   | 9 53 1 61 9 52 0     | 1340.6706100 | 1340.6708997 |
| -0.0002897 | -0.0003000 0.0000000 |              |              |
| 3577: 63   | 9 54 1 62 9 53 0     | 1340.9230800 | 1340.9229415 |
| 0.0001385  | -0.0003000 0.0000000 |              |              |
| 3578: 64   | 9 55 1 63 9 54 0     | 1341.1748500 | 1341.1748081 |
| 0.0000419  | -0.0003000 0.0000000 |              |              |
| 3579: 65   | 9 56 1 64 9 55 0     | 1341.4264300 | 1341.4264992 |
| -0.0000692 | -0.0003000 0.0000000 |              |              |
| 3580: 66   | 9 57 1 65 9 56 0     | 1341.6779500 | 1341.6780150 |
| -0.0000650 | -0.0003000 0.0000000 |              |              |
| 3581: 67   | 9 58 1 66 9 57 0     | 1341.9293900 | 1341.9293552 |
| 0.0000348  | -0.0003000 0.0000000 |              |              |
| 3582: 68   | 9 59 1 67 9 58 0     | 1342.1805300 | 1342.1805201 |
| 0.0000099  | -0.0003000 0.0000000 |              |              |
| 3583: 69   | 9 60 1 68 9 59 0     | 1342.4315100 | 1342.4315095 |
| 0.0000005  | -0.0003000 0.0000000 |              |              |
| 3584: 70   | 9 61 1 69 9 60 0     | 1342.6824300 | 1342.6823238 |
| 0.0001062  | -0.0003000 0.0000000 |              |              |
| 3585: 71   | 9 62 1 70 9 61 0     | 1342.9329400 | 1342.9329631 |
| -0.0000231 | -0.0003000 0.0000000 |              |              |
| 3586: 72   | 9 63 1 71 9 62 0     | 1343.1834900 | 1343.1834276 |
| 0.0000624  | -0.0003000 0.0000000 |              |              |
| 3587: 73   | 9 64 1 72 9 63 0     | 1343.4335400 | 1343.4337179 |
| -0.0001779 | -0.0003000 0.0000000 |              |              |
| 3588: 74   | 9 65 1 73 9 64 0     | 1343.6839300 | 1343.6838344 |
| 0.0000956  | -0.0003000 0.0000000 |              |              |
| 3589: 75   | 9 66 1 74 9 65 0     | 1343.9338100 | 1343.9337777 |
| 0.0000323  | -0.0003000 0.0000000 |              |              |
| 3590: 76   | 9 67 1 75 9 66 0     | 1344.1833900 | 1344.1835486 |
| -0.0001586 | -0.0003000 0.0000000 |              |              |
| 3591: 77   | 9 68 1 76 9 67 0     | 1344.4330700 | 1344.4331479 |
| -0.0000779 | -0.0003000 0.0000000 |              |              |
| 3592: 78   | 9 69 1 77 9 68 0     | 1344.6824600 | 1344.6825768 |
| -0.0001168 | -0.0003000 0.0000000 |              |              |
| 3593: 79   | 9 70 1 78 9 69 0     | 1344.9316400 | 1344.9318365 |
| -0.0001965 | -0.0003000 0.0000000 |              |              |
| 3594: 81   | 9 72 1 80 9 71 0     | 1345.4297100 | 1345.4298545 |
| -0.0001445 | -0.0003000 0.0000000 |              |              |
| 3595: 82   | 9 73 1 81 9 72 0     | 1345.6784600 | 1345.6786164 |
| -0.0001564 | -0.0003000 0.0000000 |              |              |
| 3596: 83   | 9 74 1 82 9 73 0     | 1345.9264400 | 1345.9272166 |
| -0.0007766 | -0.0003000 0.0000000 |              |              |
| 3597: 85   | 9 77 1 86 9 78 0     | 1301.7969400 | 1301.7976306 |
| -0.0006906 | -0.0003000 0.0000000 |              |              |
| 3598: 84   | 9 76 1 85 9 77 0     | 1302.0659700 | 1302.0664964 |
| -0.0005264 | -0.0003000 0.0000000 |              |              |
| 3599: 83   | 9 75 1 84 9 76 0     | 1302.3358300 | 1302.3353654 |
| 0.0004646  | -0.0003000 0.0000000 |              |              |
| 3600: 82   | 9 74 1 83 9 75 0     | 1302.6040000 | 1302.6042350 |
| -0.0002350 | -0.0003000 0.0000000 |              |              |
| 3601: 81   | 9 73 1 82 9 74 0     | 1302.8733000 | 1302.8731026 |
| 0.0001974  | -0.0003000 0.0000000 |              |              |
| 3602: 80   | 9 72 1 81 9 73 0     | 1303.1417600 | 1303.1419657 |
| -0.0002057 | -0.0003000 0.0000000 |              |              |
| 3603: 79   | 9 71 1 80 9 72 0     | 1303.4104800 | 1303.4108219 |
| -0.0003419 | -0.0003000 0.0000000 |              |              |
| 3604: 78   | 9 70 1 79 9 71 0     | 1303.6793300 | 1303.6796686 |
| -0.0003386 | -0.0003000 0.0000000 |              |              |
| 3605: 76   | 9 68 1 77 9 69 0     | 1304.2169900 | 1304.2173242 |

|            |            |                  |              |              |
|------------|------------|------------------|--------------|--------------|
| -0.0003342 | -0.0003000 | 0.0000000        |              |              |
| 3606:      | 75         | 9 67 1 76 9 68 0 | 1304.4859100 | 1304.4861284 |
| -0.0002184 | -0.0003000 | 0.0000000        |              |              |
| 3607:      | 74         | 9 66 1 75 9 67 0 | 1304.7543400 | 1304.7549138 |
| -0.0005738 | -0.0003000 | 0.0000000        |              |              |
| 3608:      | 73         | 9 65 1 74 9 66 0 | 1305.0236500 | 1305.0236781 |
| -0.0000281 | -0.0003000 | 0.0000000        |              |              |
| 3609:      | 72         | 9 64 1 73 9 65 0 | 1305.2924500 | 1305.2924190 |
| 0.0000310  | -0.0003000 | 0.0000000        |              |              |
| 3610:      | 71         | 9 63 1 72 9 64 0 | 1305.5610300 | 1305.5611344 |
| -0.0001044 | -0.0003000 | 0.0000000        |              |              |
| 3611:      | 70         | 9 62 1 71 9 63 0 | 1305.8298000 | 1305.8298219 |
| -0.0000219 | -0.0003000 | 0.0000000        |              |              |
| 3612:      | 69         | 9 61 1 70 9 62 0 | 1306.0984100 | 1306.0984796 |
| -0.0000696 | -0.0003000 | 0.0000000        |              |              |
| 3613:      | 68         | 9 60 1 69 9 61 0 | 1306.3672600 | 1306.3671051 |
| 0.0001549  | -0.0003000 | 0.0000000        |              |              |
| 3614:      | 67         | 9 59 1 68 9 60 0 | 1306.6356900 | 1306.6356965 |
| -0.0000065 | -0.0003000 | 0.0000000        |              |              |
| 3615:      | 66         | 9 58 1 67 9 59 0 | 1306.9045200 | 1306.9042514 |
| 0.0002686  | -0.0003000 | 0.0000000        |              |              |
| 3616:      | 65         | 9 57 1 66 9 58 0 | 1307.1726700 | 1307.1727679 |
| -0.0000979 | -0.0003000 | 0.0000000        |              |              |
| 3617:      | 64         | 9 56 1 65 9 57 0 | 1307.4412500 | 1307.4412439 |
| 0.0000061  | -0.0003000 | 0.0000000        |              |              |
| 3618:      | 63         | 9 55 1 64 9 56 0 | 1307.7096900 | 1307.7096773 |
| 0.0000127  | -0.0003000 | 0.0000000        |              |              |
| 3619:      | 62         | 9 54 1 63 9 55 0 | 1307.9779500 | 1307.9780661 |
| -0.0001161 | -0.0003000 | 0.0000000        |              |              |
| 3620:      | 61         | 9 53 1 62 9 54 0 | 1308.2464000 | 1308.2464082 |
| -0.0000082 | -0.0003000 | 0.0000000        |              |              |
| 3621:      | 60         | 9 52 1 61 9 53 0 | 1308.5146600 | 1308.5147016 |
| -0.0000416 | -0.0003000 | 0.0000000        |              |              |
| 3622:      | 59         | 9 51 1 60 9 52 0 | 1308.7828800 | 1308.7829443 |
| -0.0000643 | -0.0003000 | 0.0000000        |              |              |
| 3623:      | 58         | 9 50 1 59 9 51 0 | 1309.0509800 | 1309.0511343 |
| -0.0001543 | -0.0003000 | 0.0000000        |              |              |
| 3624:      | 57         | 9 49 1 58 9 50 0 | 1309.3192100 | 1309.3192697 |
| -0.0000597 | -0.0003000 | 0.0000000        |              |              |
| 3625:      | 56         | 9 48 1 57 9 49 0 | 1309.5874300 | 1309.5873484 |
| 0.0000816  | -0.0003000 | 0.0000000        |              |              |
| 3626:      | 55         | 9 47 1 56 9 48 0 | 1309.8553300 | 1309.8553687 |
| -0.0000387 | -0.0003000 | 0.0000000        |              |              |
| 3627:      | 54         | 9 46 1 55 9 47 0 | 1310.1232500 | 1310.1233284 |
| -0.0000784 | -0.0003000 | 0.0000000        |              |              |
| 3628:      | 53         | 9 45 1 54 9 46 0 | 1310.3913500 | 1310.3912258 |
| 0.0001242  | -0.0003000 | 0.0000000        |              |              |
| 3629:      | 52         | 9 44 1 53 9 45 0 | 1310.6588300 | 1310.6590588 |
| -0.0002288 | -0.0003000 | 0.0000000        |              |              |
| 3630:      | 51         | 9 43 1 52 9 44 0 | 1310.9266200 | 1310.9268257 |
| -0.0002057 | -0.0003000 | 0.0000000        |              |              |
| 3631:      | 50         | 9 42 1 51 9 43 0 | 1311.1945500 | 1311.1945246 |
| 0.0000254  | -0.0003000 | 0.0000000        |              |              |
| 3632:      | 49         | 9 41 1 50 9 42 0 | 1311.4621100 | 1311.4621536 |
| -0.0000436 | -0.0003000 | 0.0000000        |              |              |
| 3633:      | 48         | 9 40 1 49 9 41 0 | 1311.7298600 | 1311.7297109 |
| 0.0001491  | -0.0003000 | 0.0000000        |              |              |
| 3634:      | 47         | 9 39 1 48 9 40 0 | 1311.9973300 | 1311.9971946 |
| 0.0001354  | -0.0003000 | 0.0000000        |              |              |
| 3635:      | 46         | 9 38 1 47 9 39 0 | 1312.2647700 | 1312.2646030 |
| 0.0001670  | -0.0003000 | 0.0000000        |              |              |
| 3636:      | 45         | 9 37 1 46 9 38 0 | 1312.5320800 | 1312.5319342 |
| 0.0001458  | -0.0003000 | 0.0000000        |              |              |
| 3637:      | 44         | 9 36 1 45 9 37 0 | 1312.7993500 | 1312.7991866 |
| 0.0001634  | -0.0003000 | 0.0000000        |              |              |

|                                 |              |              |
|---------------------------------|--------------|--------------|
| 3638: 43 9 35 1 44 9 36 0       | 1313.0666900 | 1313.0663582 |
| 0.0003318 -0.0003000 0.0000000  |              |              |
| 3639: 42 9 34 1 43 9 35 0       | 1313.3336100 | 1313.3334475 |
| 0.0001625 -0.0003000 0.0000000  |              |              |
| 3640: 41 9 33 1 42 9 34 0       | 1313.6005500 | 1313.6004527 |
| 0.0000973 -0.0003000 0.0000000  |              |              |
| 3641: 40 9 32 1 41 9 33 0       | 1313.8673300 | 1313.8673721 |
| -0.0000421 -0.0003000 0.0000000 |              |              |
| 3642: 39 9 31 1 40 9 32 0       | 1314.1341500 | 1314.1342039 |
| -0.0000539 -0.0003000 0.0000000 |              |              |
| 3643: 38 9 30 1 39 9 31 0       | 1314.4008800 | 1314.4009466 |
| -0.0000666 -0.0003000 0.0000000 |              |              |
| 3644: 37 9 29 1 38 9 30 0       | 1314.6675200 | 1314.6675985 |
| -0.0000785 -0.0003000 0.0000000 |              |              |
| 3645: 36 9 28 1 37 9 29 0       | 1314.9340800 | 1314.9341579 |
| -0.0000779 -0.0003000 0.0000000 |              |              |
| 3646: 35 9 27 1 36 9 28 0       | 1315.2005200 | 1315.2006232 |
| -0.0001032 -0.0003000 0.0000000 |              |              |
| 3647: 34 9 26 1 35 9 27 0       | 1315.4668800 | 1315.4669929 |
| -0.0001129 -0.0003000 0.0000000 |              |              |
| 3648: 33 9 25 1 34 9 26 0       | 1315.7331800 | 1315.7332653 |
| -0.0000853 -0.0003000 0.0000000 |              |              |
| 3649: 32 9 24 1 33 9 25 0       | 1315.9993500 | 1315.9994390 |
| -0.0000890 -0.0003000 0.0000000 |              |              |
| 3650: 31 9 23 1 32 9 24 0       | 1316.2654900 | 1316.2655123 |
| -0.0000223 -0.0003000 0.0000000 |              |              |
| 3651: 30 9 22 1 31 9 23 0       | 1316.5313600 | 1316.5314837 |
| -0.0001237 -0.0003000 0.0000000 |              |              |
| 3652: 29 9 21 1 30 9 22 0       | 1316.7973400 | 1316.7973518 |
| -0.0000118 -0.0003000 0.0000000 |              |              |
| 3653: 28 9 20 1 29 9 21 0       | 1317.0630600 | 1317.0631151 |
| -0.0000551 -0.0003000 0.0000000 |              |              |
| 3654: 27 9 19 1 28 9 20 0       | 1317.3288600 | 1317.3287720 |
| 0.0000880 -0.0003000 0.0000000  |              |              |
| 3655: 26 9 18 1 27 9 19 0       | 1317.5943900 | 1317.5943213 |
| 0.0000687 -0.0003000 0.0000000  |              |              |
| 3656: 25 9 17 1 26 9 18 0       | 1317.8597900 | 1317.8597613 |
| 0.0000287 -0.0003000 0.0000000  |              |              |
| 3657: 23 9 15 1 24 9 16 0       | 1318.3904000 | 1318.3903084 |
| 0.0000916 -0.0003000 0.0000000  |              |              |
| 3658: 22 9 14 1 23 9 15 0       | 1318.6554000 | 1318.6554126 |
| -0.0000126 -0.0003000 0.0000000 |              |              |
| 3659: 21 9 13 1 22 9 14 0       | 1318.9202300 | 1318.9204022 |
| -0.0001722 -0.0003000 0.0000000 |              |              |
| 3660: 20 9 12 1 21 9 13 0       | 1319.1850700 | 1319.1852758 |
| -0.0002058 -0.0003000 0.0000000 |              |              |
| 3661: 19 9 11 1 20 9 12 0       | 1319.4499500 | 1319.4500321 |
| -0.0000821 -0.0003000 0.0000000 |              |              |
| 3662: 18 9 10 1 19 9 11 0       | 1319.7145600 | 1319.7146699 |
| -0.0001099 -0.0003000 0.0000000 |              |              |
| 3663: 17 9 9 1 18 9 10 0        | 1319.9791800 | 1319.9791878 |
| -0.0000078 -0.0003000 0.0000000 |              |              |
| 3664: 16 9 8 1 17 9 9 0         | 1320.2435300 | 1320.2435847 |
| -0.0000547 -0.0003000 0.0000000 |              |              |
| 3665: 15 9 7 1 16 9 8 0         | 1320.5078700 | 1320.5078593 |
| 0.0000107 -0.0003000 0.0000000  |              |              |
| 3666: 14 9 6 1 15 9 7 0         | 1320.7721400 | 1320.7720104 |
| 0.0001296 -0.0003000 0.0000000  |              |              |
| 3667: 13 9 5 1 14 9 6 0         | 1321.0360200 | 1321.0360368 |
| -0.0000168 -0.0003000 0.0000000 |              |              |
| 3668: 12 9 4 1 13 9 5 0         | 1321.2999600 | 1321.2999373 |
| 0.0000227 -0.0003000 0.0000000  |              |              |
| 3669: 11 9 3 1 12 9 4 0         | 1321.5635800 | 1321.5637109 |
| -0.0001309 -0.0003000 0.0000000 |              |              |
| 3670: 10 9 2 1 11 9 3 0         | 1321.8270900 | 1321.8273563 |

|            |            |           |              |              |
|------------|------------|-----------|--------------|--------------|
| -0.0002663 | -0.0003000 | 0.0000000 |              |              |
| 3671: 9    | 9          | 1         | 1            | 10 9 2 0     |
| -0.0002125 | -0.0003000 | 0.0000000 | 1322.0906600 | 1322.0908725 |
| 3672: 10   | 9          | 2         | 1            | 9 9 1 0      |
| 0.0001482  | -0.0003000 | 0.0000000 | 1327.3326600 | 1327.3325118 |
| 3673: 11   | 9          | 3         | 1            | 10 9 2 0     |
| 0.0000404  | -0.0003000 | 0.0000000 | 1327.5931300 | 1327.5930896 |
| 3674: 12   | 9          | 4         | 1            | 11 9 3 0     |
| 0.0000518  | -0.0003000 | 0.0000000 | 1327.8535700 | 1327.8535182 |
| 3675: 13   | 9          | 5         | 1            | 12 9 4 0     |
| 0.0000332  | -0.0003000 | 0.0000000 | 1328.1138300 | 1328.1137968 |
| 3676: 14   | 9          | 6         | 1            | 13 9 5 0     |
| 0.0001454  | -0.0003000 | 0.0000000 | 1328.3740700 | 1328.3739246 |
| 3677: 15   | 9          | 7         | 1            | 14 9 6 0     |
| 0.0001189  | -0.0003000 | 0.0000000 | 1328.6340200 | 1328.6339011 |
| 3678: 16   | 9          | 8         | 1            | 15 9 7 0     |
| 0.0001047  | -0.0003000 | 0.0000000 | 1328.8938300 | 1328.8937253 |
| 3679: 17   | 9          | 9         | 1            | 16 9 8 0     |
| 0.0000132  | -0.0003000 | 0.0000000 | 1329.1534100 | 1329.1533968 |
| 3680: 18   | 9          | 10        | 1            | 17 9 9 0     |
| -0.0000247 | -0.0003000 | 0.0000000 | 1329.4128900 | 1329.4129147 |
| 3681: 19   | 9          | 11        | 1            | 18 9 10 0    |
| -0.0001584 | -0.0003000 | 0.0000000 | 1329.6721200 | 1329.6722784 |
| 3682: 20   | 9          | 12        | 1            | 19 9 11 0    |
| 0.0000427  | -0.0003000 | 0.0000000 | 1329.9315300 | 1329.9314873 |
| 3683: 21   | 9          | 13        | 1            | 20 9 12 0    |
| -0.0000506 | -0.0003000 | 0.0000000 | 1330.1904900 | 1330.1905406 |
| 3684: 22   | 9          | 14        | 1            | 21 9 13 0    |
| 0.0000321  | -0.0003000 | 0.0000000 | 1330.4494700 | 1330.4494379 |
| 3685: 23   | 9          | 15        | 1            | 22 9 14 0    |
| -0.0000583 | -0.0003000 | 0.0000000 | 1330.7081200 | 1330.7081783 |
| 3686: 24   | 9          | 16        | 1            | 23 9 15 0    |
| 0.0002786  | -0.0003000 | 0.0000000 | 1330.9670400 | 1330.9667614 |
| 3687: 25   | 9          | 17        | 1            | 24 9 16 0    |
| 0.0000436  | -0.0003000 | 0.0000000 | 1331.2252300 | 1331.2251864 |
| 3688: 26   | 9          | 18        | 1            | 25 9 17 0    |
| -0.0002728 | -0.0003000 | 0.0000000 | 1331.4831800 | 1331.4834528 |
| 3689: 27   | 9          | 19        | 1            | 26 9 18 0    |
| 0.0002301  | -0.0003000 | 0.0000000 | 1331.7417900 | 1331.7415599 |
| 3690: 28   | 9          | 20        | 1            | 27 9 19 0    |
| -0.0000773 | -0.0003000 | 0.0000000 | 1331.9994300 | 1331.9995073 |
| 3691: 29   | 9          | 21        | 1            | 28 9 20 0    |
| -0.0000343 | -0.0003000 | 0.0000000 | 1332.2572600 | 1332.2572943 |
| 3692: 30   | 9          | 22        | 1            | 29 9 21 0    |
| -0.0000303 | -0.0003000 | 0.0000000 | 1332.5148900 | 1332.5149203 |
| 3693: 31   | 9          | 23        | 1            | 30 9 22 0    |
| -0.0000547 | -0.0003000 | 0.0000000 | 1332.7723300 | 1332.7723847 |
| 3694: 32   | 9          | 24        | 1            | 31 9 23 0    |
| 0.0001929  | -0.0003000 | 0.0000000 | 1333.0298800 | 1333.0296871 |
| 3695: 33   | 9          | 25        | 1            | 32 9 24 0    |
| -0.0000067 | -0.0003000 | 0.0000000 | 1333.2868200 | 1333.2868267 |
| 3696: 34   | 9          | 26        | 1            | 33 9 25 0    |
| -0.0000032 | -0.0003000 | 0.0000000 | 1333.5438000 | 1333.5438032 |
| 3697: 35   | 9          | 27        | 1            | 34 9 26 0    |
| -0.0000060 | -0.0003000 | 0.0000000 | 1333.8006100 | 1333.8006160 |
| 3698: 36   | 9          | 28        | 1            | 35 9 27 0    |
| 0.0000055  | -0.0003000 | 0.0000000 | 1334.0572700 | 1334.0572645 |
| 3699: 37   | 9          | 29        | 1            | 36 9 28 0    |
| 0.0000419  | -0.0003000 | 0.0000000 | 1334.3137900 | 1334.3137481 |
| 3700: 38   | 9          | 30        | 1            | 37 9 29 0    |
| 0.0001235  | -0.0003000 | 0.0000000 | 1334.5701900 | 1334.5700665 |
| 3701: 39   | 9          | 31        | 1            | 38 9 30 0    |
| -0.0000690 | -0.0003000 | 0.0000000 | 1334.8261500 | 1334.8262190 |
| 3702: 40   | 9          | 32        | 1            | 39 9 31 0    |
| -0.0000952 | -0.0003000 | 0.0000000 | 1335.0821100 | 1335.0822052 |

|            |            |           |    |   |    |   |    |   |              |              |
|------------|------------|-----------|----|---|----|---|----|---|--------------|--------------|
| 3703:      | 41         | 9         | 33 | 1 | 40 | 9 | 32 | 0 | 1335.3381800 | 1335.3380245 |
| 0.0001555  | -0.0003000 | 0.0000000 |    |   |    |   |    |   |              |              |
| 3704:      | 42         | 9         | 34 | 1 | 41 | 9 | 33 | 0 | 1335.5934300 | 1335.5936765 |
| -0.0002465 | -0.0003000 | 0.0000000 |    |   |    |   |    |   |              |              |
| 3705:      | 43         | 9         | 35 | 1 | 42 | 9 | 34 | 0 | 1335.8491500 | 1335.8491607 |
| -0.0000107 | -0.0003000 | 0.0000000 |    |   |    |   |    |   |              |              |
| 3706:      | 44         | 9         | 36 | 1 | 43 | 9 | 35 | 0 | 1336.1044700 | 1336.1044766 |
| -0.0000066 | -0.0003000 | 0.0000000 |    |   |    |   |    |   |              |              |
| 3707:      | 45         | 9         | 37 | 1 | 44 | 9 | 36 | 0 | 1336.3596900 | 1336.3596238 |
| 0.0000662  | -0.0003000 | 0.0000000 |    |   |    |   |    |   |              |              |
| 3708:      | 46         | 9         | 38 | 1 | 45 | 9 | 37 | 0 | 1336.6145500 | 1336.6146017 |
| -0.0000517 | -0.0003000 | 0.0000000 |    |   |    |   |    |   |              |              |
| 3709:      | 47         | 9         | 39 | 1 | 46 | 9 | 38 | 0 | 1336.8691600 | 1336.8694100 |
| -0.0002500 | -0.0003000 | 0.0000000 |    |   |    |   |    |   |              |              |
| 3710:      | 48         | 9         | 40 | 1 | 47 | 9 | 39 | 0 | 1337.1239400 | 1337.1240481 |
| -0.0001081 | -0.0003000 | 0.0000000 |    |   |    |   |    |   |              |              |
| 3711:      | 49         | 9         | 41 | 1 | 48 | 9 | 40 | 0 | 1337.3788400 | 1337.3785157 |
| 0.0003243  | -0.0003000 | 0.0000000 |    |   |    |   |    |   |              |              |
| 3712:      | 50         | 9         | 42 | 1 | 49 | 9 | 41 | 0 | 1337.6327900 | 1337.6328123 |
| -0.0000223 | -0.0003000 | 0.0000000 |    |   |    |   |    |   |              |              |
| 3713:      | 51         | 9         | 43 | 1 | 50 | 9 | 42 | 0 | 1337.8864500 | 1337.8869375 |
| -0.0004875 | -0.0003000 | 0.0000000 |    |   |    |   |    |   |              |              |
| 3714:      | 55         | 9         | 47 | 1 | 54 | 9 | 46 | 0 | 1338.9017800 | 1338.9017163 |
| 0.0000637  | -0.0003000 | 0.0000000 |    |   |    |   |    |   |              |              |
| 3715:      | 56         | 9         | 48 | 1 | 55 | 9 | 47 | 0 | 1339.1547600 | 1339.1549787 |
| -0.0002187 | -0.0003000 | 0.0000000 |    |   |    |   |    |   |              |              |
| 3716:      | 57         | 9         | 49 | 1 | 56 | 9 | 48 | 0 | 1339.4078400 | 1339.4080673 |
| -0.0002273 | -0.0003000 | 0.0000000 |    |   |    |   |    |   |              |              |
| 3717:      | 58         | 9         | 50 | 1 | 57 | 9 | 49 | 0 | 1339.6608900 | 1339.6609820 |
| -0.0000920 | -0.0003000 | 0.0000000 |    |   |    |   |    |   |              |              |
| 3718:      | 59         | 9         | 51 | 1 | 58 | 9 | 50 | 0 | 1339.9137700 | 1339.9137224 |
| 0.0000476  | -0.0003000 | 0.0000000 |    |   |    |   |    |   |              |              |
| 3719:      | 60         | 9         | 52 | 1 | 59 | 9 | 51 | 0 | 1340.1662500 | 1340.1662882 |
| -0.0000382 | -0.0003000 | 0.0000000 |    |   |    |   |    |   |              |              |
| 3720:      | 62         | 9         | 54 | 1 | 61 | 9 | 53 | 0 | 1340.6706100 | 1340.6708947 |
| -0.0002847 | -0.0003000 | 0.0000000 |    |   |    |   |    |   |              |              |
| 3721:      | 63         | 9         | 55 | 1 | 62 | 9 | 54 | 0 | 1340.9230800 | 1340.9229349 |
| 0.0001451  | -0.0003000 | 0.0000000 |    |   |    |   |    |   |              |              |
| 3722:      | 64         | 9         | 56 | 1 | 63 | 9 | 55 | 0 | 1341.1748500 | 1341.1747994 |
| 0.0000506  | -0.0003000 | 0.0000000 |    |   |    |   |    |   |              |              |
| 3723:      | 65         | 9         | 57 | 1 | 64 | 9 | 56 | 0 | 1341.4264300 | 1341.4264880 |
| -0.0000580 | -0.0003000 | 0.0000000 |    |   |    |   |    |   |              |              |
| 3724:      | 66         | 9         | 58 | 1 | 65 | 9 | 57 | 0 | 1341.6779500 | 1341.6780004 |
| -0.0000504 | -0.0003000 | 0.0000000 |    |   |    |   |    |   |              |              |
| 3725:      | 67         | 9         | 59 | 1 | 66 | 9 | 58 | 0 | 1341.9293900 | 1341.9293365 |
| 0.0000535  | -0.0003000 | 0.0000000 |    |   |    |   |    |   |              |              |
| 3726:      | 68         | 9         | 60 | 1 | 67 | 9 | 59 | 0 | 1342.1805300 | 1342.1804961 |
| 0.0000339  | -0.0003000 | 0.0000000 |    |   |    |   |    |   |              |              |
| 3727:      | 69         | 9         | 61 | 1 | 68 | 9 | 60 | 0 | 1342.4315100 | 1342.4314790 |
| 0.0000310  | -0.0003000 | 0.0000000 |    |   |    |   |    |   |              |              |
| 3728:      | 70         | 9         | 62 | 1 | 69 | 9 | 61 | 0 | 1342.6824300 | 1342.6822850 |
| 0.0001450  | -0.0003000 | 0.0000000 |    |   |    |   |    |   |              |              |
| 3729:      | 71         | 9         | 63 | 1 | 70 | 9 | 62 | 0 | 1342.9329400 | 1342.9329139 |
| 0.0000261  | -0.0003000 | 0.0000000 |    |   |    |   |    |   |              |              |
| 3730:      | 72         | 9         | 64 | 1 | 71 | 9 | 63 | 0 | 1343.1834900 | 1343.1833657 |
| 0.0001243  | -0.0003000 | 0.0000000 |    |   |    |   |    |   |              |              |
| 3731:      | 73         | 9         | 65 | 1 | 72 | 9 | 64 | 0 | 1343.4335400 | 1343.4336401 |
| -0.0001001 | -0.0003000 | 0.0000000 |    |   |    |   |    |   |              |              |
| 3732:      | 74         | 9         | 66 | 1 | 73 | 9 | 65 | 0 | 1343.6839300 | 1343.6837369 |
| 0.0001931  | -0.0003000 | 0.0000000 |    |   |    |   |    |   |              |              |
| 3733:      | 75         | 9         | 67 | 1 | 74 | 9 | 66 | 0 | 1343.9338100 | 1343.9336561 |
| 0.0001539  | -0.0003000 | 0.0000000 |    |   |    |   |    |   |              |              |
| 3734:      | 76         | 9         | 68 | 1 | 75 | 9 | 67 | 0 | 1344.1833900 | 1344.1833974 |
| -0.0000074 | -0.0003000 | 0.0000000 |    |   |    |   |    |   |              |              |
| 3735:      | 77         | 9         | 69 | 1 | 76 | 9 | 68 | 0 | 1344.4330700 | 1344.4329606 |

|            |            |           |              |              |
|------------|------------|-----------|--------------|--------------|
| 0.0001094  | -0.0003000 | 0.0000000 |              |              |
| 3736: 78   | 9 70       | 1 77      | 9 69         | 0            |
| 0.0001145  | -0.0003000 | 0.0000000 | 1344.6824600 | 1344.6823455 |
| 3737: 79   | 9 71       | 1 78      | 9 70         | 0            |
| 0.0000883  | -0.0003000 | 0.0000000 | 1344.9316400 | 1344.9315517 |
| 3738: 81   | 9 73       | 1 80      | 9 72         | 0            |
| 0.0002834  | -0.0003000 | 0.0000000 | 1345.4297100 | 1345.4294266 |
| 3739: 82   | 9 74       | 1 81      | 9 73         | 0            |
| 0.0003656  | -0.0003000 | 0.0000000 | 1345.6784600 | 1345.6780944 |
| 3740: 83   | 9 75       | 1 82      | 9 74         | 0            |
| -0.0001417 | -0.0003000 | 0.0000000 | 1345.9264400 | 1345.9265817 |
| 3741: 93   | 10 83      | 1 94      | 10 84        | 0            |
| 0.0000096  | -0.0003000 | 0.0000000 | 1299.4600100 | 1299.4600004 |
| 3742: 92   | 10 82      | 1 93      | 10 83        | 0            |
| -0.0007162 | -0.0003000 | 0.0000000 | 1299.7277500 | 1299.7284662 |
| 3743: 88   | 10 78      | 1 89      | 10 79        | 0            |
| 0.0003757  | -0.0003000 | 0.0000000 | 1300.8028900 | 1300.8025143 |
| 3744: 87   | 10 77      | 1 88      | 10 78        | 0            |
| -0.0003518 | -0.0003000 | 0.0000000 | 1301.0707100 | 1301.0710618 |
| 3745: 86   | 10 76      | 1 87      | 10 77        | 0            |
| 0.0000807  | -0.0003000 | 0.0000000 | 1301.3397000 | 1301.3396193 |
| 3746: 85   | 10 75      | 1 86      | 10 76        | 0            |
| -0.0002546 | -0.0003000 | 0.0000000 | 1301.6079300 | 1301.6081846 |
| 3747: 82   | 10 72      | 1 83      | 10 73        | 0            |
| -0.0001763 | -0.0003000 | 0.0000000 | 1302.4137300 | 1302.4139063 |
| 3748: 81   | 10 71      | 1 82      | 10 72        | 0            |
| 0.0002083  | -0.0003000 | 0.0000000 | 1302.6826900 | 1302.6824817 |
| 3749: 80   | 10 70      | 1 81      | 10 71        | 0            |
| 0.0004557  | -0.0003000 | 0.0000000 | 1302.9515100 | 1302.9510543 |
| 3750: 79   | 10 69      | 1 80      | 10 70        | 0            |
| 0.0001279  | -0.0003000 | 0.0000000 | 1303.2197500 | 1303.2196221 |
| 3751: 78   | 10 68      | 1 79      | 10 69        | 0            |
| 0.0001471  | -0.0003000 | 0.0000000 | 1303.4883300 | 1303.4881829 |
| 3752: 77   | 10 67      | 1 78      | 10 68        | 0            |
| -0.0001546 | -0.0003000 | 0.0000000 | 1303.7565800 | 1303.7567346 |
| 3753: 76   | 10 66      | 1 77      | 10 67        | 0            |
| -0.0003951 | -0.0003000 | 0.0000000 | 1304.0248800 | 1304.0252751 |
| 3754: 75   | 10 65      | 1 76      | 10 66        | 0            |
| -0.0003724 | -0.0003000 | 0.0000000 | 1304.2934300 | 1304.2938024 |
| 3755: 74   | 10 64      | 1 75      | 10 65        | 0            |
| -0.0002244 | -0.0003000 | 0.0000000 | 1304.5620900 | 1304.5623144 |
| 3756: 73   | 10 63      | 1 74      | 10 64        | 0            |
| 0.0002810  | -0.0003000 | 0.0000000 | 1304.8310900 | 1304.8308090 |
| 3757: 72   | 10 62      | 1 73      | 10 63        | 0            |
| 0.0000659  | -0.0003000 | 0.0000000 | 1305.0993500 | 1305.0992841 |
| 3758: 71   | 10 61      | 1 72      | 10 62        | 0            |
| 0.0001123  | -0.0003000 | 0.0000000 | 1305.3678500 | 1305.3677377 |
| 3759: 70   | 10 60      | 1 71      | 10 61        | 0            |
| -0.0000777 | -0.0003000 | 0.0000000 | 1305.6360900 | 1305.6361677 |
| 3760: 69   | 10 59      | 1 70      | 10 60        | 0            |
| 0.0002479  | -0.0003000 | 0.0000000 | 1305.9048200 | 1305.9045721 |
| 3761: 68   | 10 58      | 1 69      | 10 59        | 0            |
| 0.0000111  | -0.0003000 | 0.0000000 | 1306.1729600 | 1306.1729489 |
| 3762: 67   | 10 57      | 1 68      | 10 58        | 0            |
| 0.0000039  | -0.0003000 | 0.0000000 | 1306.4413000 | 1306.4412961 |
| 3763: 66   | 10 56      | 1 67      | 10 57        | 0            |
| -0.0002515 | -0.0003000 | 0.0000000 | 1306.7093600 | 1306.7096115 |
| 3764: 65   | 10 55      | 1 66      | 10 56        | 0            |
| -0.0001033 | -0.0003000 | 0.0000000 | 1306.9777900 | 1306.9778933 |
| 3765: 64   | 10 54      | 1 65      | 10 55        | 0            |
| -0.0001494 | -0.0003000 | 0.0000000 | 1307.2459900 | 1307.2461394 |
| 3766: 63   | 10 53      | 1 64      | 10 54        | 0            |
| -0.0000878 | -0.0003000 | 0.0000000 | 1307.5142600 | 1307.5143478 |
| 3767: 62   | 10 52      | 1 63      | 10 53        | 0            |
| -0.0000966 | -0.0003000 | 0.0000000 | 1307.7824200 | 1307.7825166 |

|       |            |            |           |   |    |    |    |   |              |              |
|-------|------------|------------|-----------|---|----|----|----|---|--------------|--------------|
| 3768: | 61         | 10         | 51        | 1 | 62 | 10 | 52 | 0 | 1308.0508400 | 1308.0506438 |
|       | 0.0001962  | -0.0003000 | 0.0000000 |   |    |    |    |   |              |              |
| 3769: | 60         | 10         | 50        | 1 | 61 | 10 | 51 | 0 | 1308.3186400 | 1308.3187273 |
|       | -0.0000873 | -0.0003000 | 0.0000000 |   |    |    |    |   |              |              |
| 3770: | 59         | 10         | 49        | 1 | 60 | 10 | 50 | 0 | 1308.5871400 | 1308.5867654 |
|       | 0.0003746  | -0.0003000 | 0.0000000 |   |    |    |    |   |              |              |
| 3771: | 58         | 10         | 48        | 1 | 59 | 10 | 49 | 0 | 1308.8545900 | 1308.8547560 |
|       | -0.0001660 | -0.0003000 | 0.0000000 |   |    |    |    |   |              |              |
| 3772: | 57         | 10         | 47        | 1 | 58 | 10 | 48 | 0 | 1309.1226600 | 1309.1226972 |
|       | -0.0000372 | -0.0003000 | 0.0000000 |   |    |    |    |   |              |              |
| 3773: | 56         | 10         | 46        | 1 | 57 | 10 | 47 | 0 | 1309.3906300 | 1309.3905872 |
|       | 0.0000428  | -0.0003000 | 0.0000000 |   |    |    |    |   |              |              |
| 3774: | 55         | 10         | 45        | 1 | 56 | 10 | 46 | 0 | 1309.6583500 | 1309.6584239 |
|       | -0.0000739 | -0.0003000 | 0.0000000 |   |    |    |    |   |              |              |
| 3775: | 54         | 10         | 44        | 1 | 55 | 10 | 45 | 0 | 1309.9262000 | 1309.9262055 |
|       | -0.0000055 | -0.0003000 | 0.0000000 |   |    |    |    |   |              |              |
| 3776: | 53         | 10         | 43        | 1 | 54 | 10 | 44 | 0 | 1310.1940100 | 1310.1939301 |
|       | 0.0000799  | -0.0003000 | 0.0000000 |   |    |    |    |   |              |              |
| 3777: | 52         | 10         | 42        | 1 | 53 | 10 | 43 | 0 | 1310.4615600 | 1310.4615958 |
|       | -0.0000358 | -0.0003000 | 0.0000000 |   |    |    |    |   |              |              |
| 3778: | 51         | 10         | 41        | 1 | 52 | 10 | 42 | 0 | 1310.7292900 | 1310.7292009 |
|       | 0.0000891  | -0.0003000 | 0.0000000 |   |    |    |    |   |              |              |
| 3779: | 50         | 10         | 40        | 1 | 51 | 10 | 41 | 0 | 1310.9967700 | 1310.9967433 |
|       | 0.0000267  | -0.0003000 | 0.0000000 |   |    |    |    |   |              |              |
| 3780: | 49         | 10         | 39        | 1 | 50 | 10 | 40 | 0 | 1311.2641700 | 1311.2642213 |
|       | -0.0000513 | -0.0003000 | 0.0000000 |   |    |    |    |   |              |              |
| 3781: | 48         | 10         | 38        | 1 | 49 | 10 | 39 | 0 | 1311.5315700 | 1311.5316331 |
|       | -0.0000631 | -0.0003000 | 0.0000000 |   |    |    |    |   |              |              |
| 3782: | 47         | 10         | 37        | 1 | 48 | 10 | 38 | 0 | 1311.7989600 | 1311.7989769 |
|       | -0.0000169 | -0.0003000 | 0.0000000 |   |    |    |    |   |              |              |
| 3783: | 46         | 10         | 36        | 1 | 47 | 10 | 37 | 0 | 1312.0664500 | 1312.0662508 |
|       | 0.0001992  | -0.0003000 | 0.0000000 |   |    |    |    |   |              |              |
| 3784: | 45         | 10         | 35        | 1 | 46 | 10 | 36 | 0 | 1312.3333600 | 1312.3334531 |
|       | -0.0000931 | -0.0003000 | 0.0000000 |   |    |    |    |   |              |              |
| 3785: | 44         | 10         | 34        | 1 | 45 | 10 | 35 | 0 | 1312.6004300 | 1312.6005819 |
|       | -0.0001519 | -0.0003000 | 0.0000000 |   |    |    |    |   |              |              |
| 3786: | 43         | 10         | 33        | 1 | 44 | 10 | 34 | 0 | 1312.8674000 | 1312.8676356 |
|       | -0.0002356 | -0.0003000 | 0.0000000 |   |    |    |    |   |              |              |
| 3787: | 42         | 10         | 32        | 1 | 43 | 10 | 33 | 0 | 1313.1345700 | 1313.1346124 |
|       | -0.0000424 | -0.0003000 | 0.0000000 |   |    |    |    |   |              |              |
| 3788: | 41         | 10         | 31        | 1 | 42 | 10 | 32 | 0 | 1313.4015300 | 1313.4015105 |
|       | 0.0000195  | -0.0003000 | 0.0000000 |   |    |    |    |   |              |              |
| 3789: | 40         | 10         | 30        | 1 | 41 | 10 | 31 | 0 | 1313.6680600 | 1313.6683282 |
|       | -0.0002682 | -0.0003000 | 0.0000000 |   |    |    |    |   |              |              |
| 3790: | 28         | 10         | 18        | 1 | 29 | 10 | 19 | 0 | 1316.8632800 | 1316.8632630 |
|       | 0.0000170  | -0.0003000 | 0.0000000 |   |    |    |    |   |              |              |
| 3791: | 27         | 10         | 17        | 1 | 28 | 10 | 18 | 0 | 1317.1289100 | 1317.1288854 |
|       | 0.0000246  | -0.0003000 | 0.0000000 |   |    |    |    |   |              |              |
| 3792: | 26         | 10         | 16        | 1 | 27 | 10 | 17 | 0 | 1317.3944000 | 1317.3944047 |
|       | -0.0000047 | -0.0003000 | 0.0000000 |   |    |    |    |   |              |              |
| 3793: | 25         | 10         | 15        | 1 | 26 | 10 | 16 | 0 | 1317.6598100 | 1317.6598195 |
|       | -0.0000095 | -0.0003000 | 0.0000000 |   |    |    |    |   |              |              |
| 3794: | 24         | 10         | 14        | 1 | 25 | 10 | 15 | 0 | 1317.9249100 | 1317.9251282 |
|       | -0.0002182 | -0.0003000 | 0.0000000 |   |    |    |    |   |              |              |
| 3795: | 23         | 10         | 13        | 1 | 24 | 10 | 14 | 0 | 1318.1902500 | 1318.1903295 |
|       | -0.0000795 | -0.0003000 | 0.0000000 |   |    |    |    |   |              |              |
| 3796: | 22         | 10         | 12        | 1 | 23 | 10 | 13 | 0 | 1318.4557100 | 1318.4554217 |
|       | 0.0002883  | -0.0003000 | 0.0000000 |   |    |    |    |   |              |              |
| 3797: | 21         | 10         | 11        | 1 | 22 | 10 | 12 | 0 | 1318.7200200 | 1318.7204036 |
|       | -0.0003836 | -0.0003000 | 0.0000000 |   |    |    |    |   |              |              |
| 3798: | 20         | 10         | 10        | 1 | 21 | 10 | 11 | 0 | 1318.9851300 | 1318.9852736 |
|       | -0.0001436 | -0.0003000 | 0.0000000 |   |    |    |    |   |              |              |
| 3799: | 19         | 10         | 9         | 1 | 20 | 10 | 10 | 0 | 1319.2497600 | 1319.2500303 |
|       | -0.0002703 | -0.0003000 | 0.0000000 |   |    |    |    |   |              |              |
| 3800: | 18         | 10         | 8         | 1 | 19 | 10 | 9  | 0 | 1319.5143800 | 1319.5146723 |

|            |            |           |    |                           |
|------------|------------|-----------|----|---------------------------|
| -0.0002923 | -0.0003000 | 0.0000000 |    |                           |
| 3801:      | 17         | 10        | 7  | 1 18 10 8 0               |
|            |            |           |    | 1319.7791100 1319.7791983 |
| -0.0000883 | -0.0003000 | 0.0000000 |    |                           |
| 3802:      | 16         | 10        | 6  | 1 17 10 7 0               |
|            |            |           |    | 1320.0437000 1320.0436068 |
| 0.0000932  | -0.0003000 | 0.0000000 |    |                           |
| 3803:      | 15         | 10        | 5  | 1 16 10 6 0               |
|            |            |           |    | 1320.3077700 1320.3078965 |
| -0.0001265 | -0.0003000 | 0.0000000 |    |                           |
| 3804:      | 12         | 10        | 2  | 1 11 10 1 0               |
|            |            |           |    | 1327.6547300 1327.6546714 |
| 0.0000586  | -0.0003000 | 0.0000000 |    |                           |
| 3805:      | 13         | 10        | 3  | 1 12 10 2 0               |
|            |            |           |    | 1327.9153200 1327.9149834 |
| 0.0003366  | -0.0003000 | 0.0000000 |    |                           |
| 3806:      | 14         | 10        | 4  | 1 13 10 3 0               |
|            |            |           |    | 1328.1751600 1328.1751417 |
| 0.0000183  | -0.0003000 | 0.0000000 |    |                           |
| 3807:      | 15         | 10        | 5  | 1 14 10 4 0               |
|            |            |           |    | 1328.4352800 1328.4351454 |
| 0.0001346  | -0.0003000 | 0.0000000 |    |                           |
| 3808:      | 16         | 10        | 6  | 1 15 10 5 0               |
|            |            |           |    | 1328.6953400 1328.6949934 |
| 0.0003466  | -0.0003000 | 0.0000000 |    |                           |
| 3809:      | 17         | 10        | 7  | 1 16 10 6 0               |
|            |            |           |    | 1328.9543200 1328.9546848 |
| -0.0003648 | -0.0003000 | 0.0000000 |    |                           |
| 3810:      | 18         | 10        | 8  | 1 17 10 7 0               |
|            |            |           |    | 1329.2140200 1329.2142185 |
| -0.0001985 | -0.0003000 | 0.0000000 |    |                           |
| 3811:      | 19         | 10        | 9  | 1 18 10 8 0               |
|            |            |           |    | 1329.4733200 1329.4735937 |
| -0.0002737 | -0.0003000 | 0.0000000 |    |                           |
| 3812:      | 20         | 10        | 10 | 1 19 10 9 0               |
|            |            |           |    | 1329.7324700 1329.7328093 |
| -0.0003393 | -0.0003000 | 0.0000000 |    |                           |
| 3813:      | 21         | 10        | 11 | 1 20 10 10 0              |
|            |            |           |    | 1329.9914900 1329.9918645 |
| -0.0003745 | -0.0003000 | 0.0000000 |    |                           |
| 3814:      | 22         | 10        | 12 | 1 21 10 11 0              |
|            |            |           |    | 1330.2507200 1330.2507582 |
| -0.0000382 | -0.0003000 | 0.0000000 |    |                           |
| 3815:      | 23         | 10        | 13 | 1 22 10 12 0              |
|            |            |           |    | 1330.5095200 1330.5094895 |
| 0.0000305  | -0.0003000 | 0.0000000 |    |                           |
| 3816:      | 24         | 10        | 14 | 1 23 10 13 0              |
|            |            |           |    | 1330.7680500 1330.7680574 |
| -0.0000074 | -0.0003000 | 0.0000000 |    |                           |
| 3817:      | 25         | 10        | 15 | 1 24 10 14 0              |
|            |            |           |    | 1331.0264200 1331.0264611 |
| -0.0000411 | -0.0003000 | 0.0000000 |    |                           |
| 3818:      | 26         | 10        | 16 | 1 25 10 15 0              |
|            |            |           |    | 1331.2845400 1331.2846996 |
| -0.0001596 | -0.0003000 | 0.0000000 |    |                           |
| 3819:      | 27         | 10        | 17 | 1 26 10 16 0              |
|            |            |           |    | 1331.5424800 1331.5427720 |
| -0.0002920 | -0.0003000 | 0.0000000 |    |                           |
| 3820:      | 28         | 10        | 18 | 1 27 10 17 0              |
|            |            |           |    | 1331.8006100 1331.8006773 |
| -0.0000673 | -0.0003000 | 0.0000000 |    |                           |
| 3821:      | 29         | 10        | 19 | 1 28 10 18 0              |
|            |            |           |    | 1332.0583500 1332.0584147 |
| -0.0000647 | -0.0003000 | 0.0000000 |    |                           |
| 3822:      | 30         | 10        | 20 | 1 29 10 19 0              |
|            |            |           |    | 1332.3159900 1332.3159832 |
| 0.0000068  | -0.0003000 | 0.0000000 |    |                           |
| 3823:      | 31         | 10        | 21 | 1 30 10 20 0              |
|            |            |           |    | 1332.5735800 1332.5733820 |
| 0.0001980  | -0.0003000 | 0.0000000 |    |                           |
| 3824:      | 32         | 10        | 22 | 1 31 10 21 0              |
|            |            |           |    | 1332.8304900 1332.8306100 |
| -0.0001200 | -0.0003000 | 0.0000000 |    |                           |
| 3825:      | 33         | 10        | 23 | 1 32 10 22 0              |
|            |            |           |    | 1333.0879600 1333.0876665 |
| 0.0002935  | -0.0003000 | 0.0000000 |    |                           |
| 3826:      | 34         | 10        | 24 | 1 33 10 23 0              |
|            |            |           |    | 1333.3444300 1333.3445505 |
| -0.0001205 | -0.0003000 | 0.0000000 |    |                           |
| 3827:      | 35         | 10        | 25 | 1 34 10 24 0              |
|            |            |           |    | 1333.6012100 1333.6012611 |
| -0.0000511 | -0.0003000 | 0.0000000 |    |                           |
| 3828:      | 36         | 10        | 26 | 1 35 10 25 0              |
|            |            |           |    | 1333.8577400 1333.8577975 |
| -0.0000575 | -0.0003000 | 0.0000000 |    |                           |
| 3829:      | 37         | 10        | 27 | 1 36 10 26 0              |
|            |            |           |    | 1334.1143700 1334.1141587 |
| 0.0002113  | -0.0003000 | 0.0000000 |    |                           |
| 3830:      | 38         | 10        | 28 | 1 37 10 27 0              |
|            |            |           |    | 1334.3704000 1334.3703438 |
| 0.0000562  | -0.0003000 | 0.0000000 |    |                           |
| 3831:      | 39         | 10        | 29 | 1 38 10 28 0              |
|            |            |           |    | 1334.6264000 1334.6263520 |
| 0.0000480  | -0.0003000 | 0.0000000 |    |                           |
| 3832:      | 40         | 10        | 30 | 1 39 10 29 0              |
|            |            |           |    | 1334.8821500 1334.8821823 |
| -0.0000323 | -0.0003000 | 0.0000000 |    |                           |

|            |            |           |    |   |    |    |    |   |              |              |
|------------|------------|-----------|----|---|----|----|----|---|--------------|--------------|
| 3833:      | 41         | 10        | 31 | 1 | 40 | 10 | 30 | 0 | 1335.1377500 | 1335.1378339 |
| -0.0000839 | -0.0003000 | 0.0000000 |    |   |    |    |    |   |              |              |
| 3834:      | 42         | 10        | 32 | 1 | 41 | 10 | 31 | 0 | 1335.3933300 | 1335.3933060 |
| 0.0000240  | -0.0003000 | 0.0000000 |    |   |    |    |    |   |              |              |
| 3835:      | 43         | 10        | 33 | 1 | 42 | 10 | 32 | 0 | 1335.6485900 | 1335.6485976 |
| -0.0000076 | -0.0003000 | 0.0000000 |    |   |    |    |    |   |              |              |
| 3836:      | 44         | 10        | 34 | 1 | 43 | 10 | 33 | 0 | 1335.9036900 | 1335.9037078 |
| -0.0000178 | -0.0003000 | 0.0000000 |    |   |    |    |    |   |              |              |
| 3837:      | 45         | 10        | 35 | 1 | 44 | 10 | 34 | 0 | 1336.1587700 | 1336.1586358 |
| 0.0001342  | -0.0003000 | 0.0000000 |    |   |    |    |    |   |              |              |
| 3838:      | 46         | 10        | 36 | 1 | 45 | 10 | 35 | 0 | 1336.4135100 | 1336.4133806 |
| 0.0001294  | -0.0003000 | 0.0000000 |    |   |    |    |    |   |              |              |
| 3839:      | 47         | 10        | 37 | 1 | 46 | 10 | 36 | 0 | 1336.6680300 | 1336.6679415 |
| 0.0000885  | -0.0003000 | 0.0000000 |    |   |    |    |    |   |              |              |
| 3840:      | 48         | 10        | 38 | 1 | 47 | 10 | 37 | 0 | 1336.9225100 | 1336.9223175 |
| 0.0001925  | -0.0003000 | 0.0000000 |    |   |    |    |    |   |              |              |
| 3841:      | 49         | 10        | 39 | 1 | 48 | 10 | 38 | 0 | 1337.1766300 | 1337.1765078 |
| 0.0001222  | -0.0003000 | 0.0000000 |    |   |    |    |    |   |              |              |
| 3842:      | 50         | 10        | 40 | 1 | 49 | 10 | 39 | 0 | 1337.4306100 | 1337.4305115 |
| 0.0000985  | -0.0003000 | 0.0000000 |    |   |    |    |    |   |              |              |
| 3843:      | 51         | 10        | 41 | 1 | 50 | 10 | 40 | 0 | 1337.6842200 | 1337.6843278 |
| -0.0001078 | -0.0003000 | 0.0000000 |    |   |    |    |    |   |              |              |
| 3844:      | 52         | 10        | 42 | 1 | 51 | 10 | 41 | 0 | 1337.9379100 | 1337.9379556 |
| -0.0000456 | -0.0003000 | 0.0000000 |    |   |    |    |    |   |              |              |
| 3845:      | 53         | 10        | 43 | 1 | 52 | 10 | 42 | 0 | 1338.1914200 | 1338.1913943 |
| 0.0000257  | -0.0003000 | 0.0000000 |    |   |    |    |    |   |              |              |
| 3846:      | 54         | 10        | 44 | 1 | 53 | 10 | 43 | 0 | 1338.4446600 | 1338.4446429 |
| 0.0000171  | -0.0003000 | 0.0000000 |    |   |    |    |    |   |              |              |
| 3847:      | 55         | 10        | 45 | 1 | 54 | 10 | 44 | 0 | 1338.6978000 | 1338.6977006 |
| 0.0000994  | -0.0003000 | 0.0000000 |    |   |    |    |    |   |              |              |
| 3848:      | 56         | 10        | 46 | 1 | 55 | 10 | 45 | 0 | 1338.9503900 | 1338.9505664 |
| -0.0001764 | -0.0003000 | 0.0000000 |    |   |    |    |    |   |              |              |
| 3849:      | 57         | 10        | 47 | 1 | 56 | 10 | 46 | 0 | 1339.2031000 | 1339.2032396 |
| -0.0001396 | -0.0003000 | 0.0000000 |    |   |    |    |    |   |              |              |
| 3850:      | 58         | 10        | 48 | 1 | 57 | 10 | 47 | 0 | 1339.4558100 | 1339.4557193 |
| 0.0000907  | -0.0003000 | 0.0000000 |    |   |    |    |    |   |              |              |
| 3851:      | 59         | 10        | 49 | 1 | 58 | 10 | 48 | 0 | 1339.7079800 | 1339.7080047 |
| -0.0000247 | -0.0003000 | 0.0000000 |    |   |    |    |    |   |              |              |
| 3852:      | 60         | 10        | 50 | 1 | 59 | 10 | 49 | 0 | 1339.9599300 | 1339.9600948 |
| -0.0001648 | -0.0003000 | 0.0000000 |    |   |    |    |    |   |              |              |
| 3853:      | 61         | 10        | 51 | 1 | 60 | 10 | 50 | 0 | 1340.2121400 | 1340.2119889 |
| 0.0001511  | -0.0003000 | 0.0000000 |    |   |    |    |    |   |              |              |
| 3854:      | 62         | 10        | 52 | 1 | 61 | 10 | 51 | 0 | 1340.4637600 | 1340.4636860 |
| 0.0000740  | -0.0003000 | 0.0000000 |    |   |    |    |    |   |              |              |
| 3855:      | 63         | 10        | 53 | 1 | 62 | 10 | 52 | 0 | 1340.7150700 | 1340.7151855 |
| -0.0001155 | -0.0003000 | 0.0000000 |    |   |    |    |    |   |              |              |
| 3856:      | 64         | 10        | 54 | 1 | 63 | 10 | 53 | 0 | 1340.9663100 | 1340.9664863 |
| -0.0001763 | -0.0003000 | 0.0000000 |    |   |    |    |    |   |              |              |
| 3857:      | 65         | 10        | 55 | 1 | 64 | 10 | 54 | 0 | 1341.2175900 | 1341.2175878 |
| 0.0000022  | -0.0003000 | 0.0000000 |    |   |    |    |    |   |              |              |
| 3858:      | 66         | 10        | 56 | 1 | 65 | 10 | 55 | 0 | 1341.4687200 | 1341.4684891 |
| 0.0002309  | -0.0003000 | 0.0000000 |    |   |    |    |    |   |              |              |
| 3859:      | 67         | 10        | 57 | 1 | 66 | 10 | 56 | 0 | 1341.7194500 | 1341.7191894 |
| 0.0002606  | -0.0003000 | 0.0000000 |    |   |    |    |    |   |              |              |
| 3860:      | 69         | 10        | 59 | 1 | 68 | 10 | 58 | 0 | 1342.2205000 | 1342.2199837 |
| 0.0005163  | -0.0003000 | 0.0000000 |    |   |    |    |    |   |              |              |
| 3861:      | 70         | 10        | 60 | 1 | 69 | 10 | 59 | 0 | 1342.4700800 | 1342.4700761 |
| 0.0000039  | -0.0003000 | 0.0000000 |    |   |    |    |    |   |              |              |
| 3862:      | 71         | 10        | 61 | 1 | 70 | 10 | 60 | 0 | 1342.7201300 | 1342.7199644 |
| 0.0001656  | -0.0003000 | 0.0000000 |    |   |    |    |    |   |              |              |
| 3863:      | 72         | 10        | 62 | 1 | 71 | 10 | 61 | 0 | 1342.9696800 | 1342.9696477 |
| 0.0000323  | -0.0003000 | 0.0000000 |    |   |    |    |    |   |              |              |
| 3864:      | 73         | 10        | 63 | 1 | 72 | 10 | 62 | 0 | 1343.2193600 | 1343.2191254 |
| 0.0002346  | -0.0003000 | 0.0000000 |    |   |    |    |    |   |              |              |
| 3865:      | 74         | 10        | 64 | 1 | 73 | 10 | 63 | 0 | 1343.4684700 | 1343.4683967 |

|            |                    |           |              |              |
|------------|--------------------|-----------|--------------|--------------|
| 0.0000733  | -0.0003000         | 0.0000000 |              |              |
| 3866: 75   | 10 65 1 74 10 64 0 |           | 1343.7173900 | 1343.7174610 |
| -0.0000710 | -0.0003000         | 0.0000000 |              |              |
| 3867: 76   | 10 66 1 75 10 65 0 |           | 1343.9664500 | 1343.9663174 |
| 0.0001326  | -0.0003000         | 0.0000000 |              |              |
| 3868: 77   | 10 67 1 76 10 66 0 |           | 1344.2148100 | 1344.2149654 |
| -0.0001554 | -0.0003000         | 0.0000000 |              |              |
| 3869: 78   | 10 68 1 77 10 67 0 |           | 1344.4634900 | 1344.4634043 |
| 0.0000857  | -0.0003000         | 0.0000000 |              |              |
| 3870: 79   | 10 69 1 78 10 68 0 |           | 1344.7120200 | 1344.7116335 |
| 0.0003865  | -0.0003000         | 0.0000000 |              |              |
| 3871: 80   | 10 70 1 79 10 69 0 |           | 1344.9595000 | 1344.9596524 |
| -0.0001524 | -0.0003000         | 0.0000000 |              |              |
| 3872: 81   | 10 71 1 80 10 70 0 |           | 1345.2078100 | 1345.2074606 |
| 0.0003494  | -0.0003000         | 0.0000000 |              |              |
| 3873: 82   | 10 72 1 81 10 71 0 |           | 1345.4549200 | 1345.4550574 |
| -0.0001374 | -0.0003000         | 0.0000000 |              |              |
| 3874: 83   | 10 73 1 82 10 72 0 |           | 1345.7029300 | 1345.7024425 |
| 0.0004875  | -0.0003000         | 0.0000000 |              |              |
| 3875: 84   | 10 74 1 83 10 73 0 |           | 1345.9497400 | 1345.9496155 |
| 0.0001245  | -0.0003000         | 0.0000000 |              |              |
| 3876: 85   | 10 75 1 84 10 74 0 |           | 1346.1970900 | 1346.1965759 |
| 0.0005141  | -0.0003000         | 0.0000000 |              |              |
| 3877: 88   | 10 78 1 87 10 77 0 |           | 1346.9370400 | 1346.9361800 |
| 0.0008600  | -0.0003000         | 0.0000000 |              |              |
| 3878: 93   | 10 84 1 94 10 85 0 |           | 1299.4600100 | 1299.4600759 |
| -0.0000659 | -0.0003000         | 0.0000000 |              |              |
| 3879: 92   | 10 83 1 93 10 84 0 |           | 1299.7277500 | 1299.7285302 |
| -0.0007802 | -0.0003000         | 0.0000000 |              |              |
| 3880: 88   | 10 79 1 89 10 80 0 |           | 1300.8028900 | 1300.8025462 |
| 0.0003438  | -0.0003000         | 0.0000000 |              |              |
| 3881: 87   | 10 78 1 88 10 79 0 |           | 1301.0707100 | 1301.0710884 |
| -0.0003784 | -0.0003000         | 0.0000000 |              |              |
| 3882: 86   | 10 77 1 87 10 78 0 |           | 1301.3397000 | 1301.3396414 |
| 0.0000586  | -0.0003000         | 0.0000000 |              |              |
| 3883: 85   | 10 76 1 86 10 77 0 |           | 1301.6079300 | 1301.6082030 |
| -0.0002730 | -0.0003000         | 0.0000000 |              |              |
| 3884: 82   | 10 73 1 83 10 74 0 |           | 1302.4137300 | 1302.4139165 |
| -0.0001865 | -0.0003000         | 0.0000000 |              |              |
| 3885: 81   | 10 72 1 82 10 73 0 |           | 1302.6826900 | 1302.6824901 |
| 0.0001999  | -0.0003000         | 0.0000000 |              |              |
| 3886: 80   | 10 71 1 81 10 72 0 |           | 1302.9515100 | 1302.9510612 |
| 0.0004488  | -0.0003000         | 0.0000000 |              |              |
| 3887: 79   | 10 70 1 80 10 71 0 |           | 1303.2197500 | 1303.2196276 |
| 0.0001224  | -0.0003000         | 0.0000000 |              |              |
| 3888: 78   | 10 69 1 79 10 70 0 |           | 1303.4883300 | 1303.4881874 |
| 0.0001426  | -0.0003000         | 0.0000000 |              |              |
| 3889: 77   | 10 68 1 78 10 69 0 |           | 1303.7565800 | 1303.7567382 |
| -0.0001582 | -0.0003000         | 0.0000000 |              |              |
| 3890: 76   | 10 67 1 77 10 68 0 |           | 1304.0248800 | 1304.0252780 |
| -0.0003980 | -0.0003000         | 0.0000000 |              |              |
| 3891: 75   | 10 66 1 76 10 67 0 |           | 1304.2934300 | 1304.2938047 |
| -0.0003747 | -0.0003000         | 0.0000000 |              |              |
| 3892: 74   | 10 65 1 75 10 66 0 |           | 1304.5620900 | 1304.5623162 |
| -0.0002262 | -0.0003000         | 0.0000000 |              |              |
| 3893: 73   | 10 64 1 74 10 65 0 |           | 1304.8310900 | 1304.8308104 |
| 0.0002796  | -0.0003000         | 0.0000000 |              |              |
| 3894: 72   | 10 63 1 73 10 64 0 |           | 1305.0993500 | 1305.0992852 |
| 0.0000648  | -0.0003000         | 0.0000000 |              |              |
| 3895: 71   | 10 62 1 72 10 63 0 |           | 1305.3678500 | 1305.3677386 |
| 0.0001114  | -0.0003000         | 0.0000000 |              |              |
| 3896: 70   | 10 61 1 71 10 62 0 |           | 1305.6360900 | 1305.6361684 |
| -0.0000784 | -0.0003000         | 0.0000000 |              |              |
| 3897: 69   | 10 60 1 70 10 61 0 |           | 1305.9048200 | 1305.9045727 |
| 0.0002473  | -0.0003000         | 0.0000000 |              |              |

|                                 |              |              |
|---------------------------------|--------------|--------------|
| 3898: 68 10 59 1 69 10 60 0     | 1306.1729600 | 1306.1729494 |
| 0.0000106 -0.0003000 0.0000000  |              |              |
| 3899: 67 10 58 1 68 10 59 0     | 1306.4413000 | 1306.4412964 |
| 0.0000036 -0.0003000 0.0000000  |              |              |
| 3900: 66 10 57 1 67 10 58 0     | 1306.7093600 | 1306.7096118 |
| -0.0002518 -0.0003000 0.0000000 |              |              |
| 3901: 65 10 56 1 66 10 57 0     | 1306.9777900 | 1306.9778935 |
| -0.0001035 -0.0003000 0.0000000 |              |              |
| 3902: 64 10 55 1 65 10 56 0     | 1307.2459900 | 1307.2461395 |
| -0.0001495 -0.0003000 0.0000000 |              |              |
| 3903: 63 10 54 1 64 10 55 0     | 1307.5142600 | 1307.5143479 |
| -0.0000879 -0.0003000 0.0000000 |              |              |
| 3904: 62 10 53 1 63 10 54 0     | 1307.7824200 | 1307.7825167 |
| -0.0000967 -0.0003000 0.0000000 |              |              |
| 3905: 61 10 52 1 62 10 53 0     | 1308.0508400 | 1308.0506438 |
| 0.0001962 -0.0003000 0.0000000  |              |              |
| 3906: 60 10 51 1 61 10 52 0     | 1308.3186400 | 1308.3187274 |
| -0.0000874 -0.0003000 0.0000000 |              |              |
| 3907: 59 10 50 1 60 10 51 0     | 1308.5871400 | 1308.5867654 |
| 0.0003746 -0.0003000 0.0000000  |              |              |
| 3908: 58 10 49 1 59 10 50 0     | 1308.8545900 | 1308.8547560 |
| -0.0001660 -0.0003000 0.0000000 |              |              |
| 3909: 57 10 48 1 58 10 49 0     | 1309.1226600 | 1309.1226973 |
| -0.0000373 -0.0003000 0.0000000 |              |              |
| 3910: 56 10 47 1 57 10 48 0     | 1309.3906300 | 1309.3905872 |
| 0.0000428 -0.0003000 0.0000000  |              |              |
| 3911: 55 10 46 1 56 10 47 0     | 1309.6583500 | 1309.6584239 |
| -0.0000739 -0.0003000 0.0000000 |              |              |
| 3912: 54 10 45 1 55 10 46 0     | 1309.9262000 | 1309.9262055 |
| -0.0000055 -0.0003000 0.0000000 |              |              |
| 3913: 53 10 44 1 54 10 45 0     | 1310.1940100 | 1310.1939301 |
| 0.0000799 -0.0003000 0.0000000  |              |              |
| 3914: 52 10 43 1 53 10 44 0     | 1310.4615600 | 1310.4615958 |
| -0.0000358 -0.0003000 0.0000000 |              |              |
| 3915: 51 10 42 1 52 10 43 0     | 1310.7292900 | 1310.7292009 |
| 0.0000891 -0.0003000 0.0000000  |              |              |
| 3916: 50 10 41 1 51 10 42 0     | 1310.9967700 | 1310.9967433 |
| 0.0000267 -0.0003000 0.0000000  |              |              |
| 3917: 49 10 40 1 50 10 41 0     | 1311.2641700 | 1311.2642213 |
| -0.0000513 -0.0003000 0.0000000 |              |              |
| 3918: 48 10 39 1 49 10 40 0     | 1311.5315700 | 1311.5316331 |
| -0.0000631 -0.0003000 0.0000000 |              |              |
| 3919: 47 10 38 1 48 10 39 0     | 1311.7989600 | 1311.7989769 |
| -0.0000169 -0.0003000 0.0000000 |              |              |
| 3920: 46 10 37 1 47 10 38 0     | 1312.0664500 | 1312.0662508 |
| 0.0001992 -0.0003000 0.0000000  |              |              |
| 3921: 45 10 36 1 46 10 37 0     | 1312.3333600 | 1312.3334531 |
| -0.0000931 -0.0003000 0.0000000 |              |              |
| 3922: 44 10 35 1 45 10 36 0     | 1312.6004300 | 1312.6005819 |
| -0.0001519 -0.0003000 0.0000000 |              |              |
| 3923: 43 10 34 1 44 10 35 0     | 1312.8674000 | 1312.8676356 |
| -0.0002356 -0.0003000 0.0000000 |              |              |
| 3924: 42 10 33 1 43 10 34 0     | 1313.1345700 | 1313.1346124 |
| -0.0000424 -0.0003000 0.0000000 |              |              |
| 3925: 41 10 32 1 42 10 33 0     | 1313.4015300 | 1313.4015105 |
| 0.0000195 -0.0003000 0.0000000  |              |              |
| 3926: 40 10 31 1 41 10 32 0     | 1313.6680600 | 1313.6683282 |
| -0.0002682 -0.0003000 0.0000000 |              |              |
| 3927: 28 10 19 1 29 10 20 0     | 1316.8632800 | 1316.8632630 |
| 0.0000170 -0.0003000 0.0000000  |              |              |
| 3928: 27 10 18 1 28 10 19 0     | 1317.1289100 | 1317.1288854 |
| 0.0000246 -0.0003000 0.0000000  |              |              |
| 3929: 26 10 17 1 27 10 18 0     | 1317.3944000 | 1317.3944047 |
| -0.0000047 -0.0003000 0.0000000 |              |              |
| 3930: 25 10 16 1 26 10 17 0     | 1317.6598100 | 1317.6598195 |

|            |                    |           |              |              |
|------------|--------------------|-----------|--------------|--------------|
| -0.0000095 | -0.0003000         | 0.0000000 |              |              |
| 3931: 24   | 10 15 1 25 10 16 0 |           | 1317.9249100 | 1317.9251282 |
| -0.0002182 | -0.0003000         | 0.0000000 |              |              |
| 3932: 23   | 10 14 1 24 10 15 0 |           | 1318.1902500 | 1318.1903295 |
| -0.0000795 | -0.0003000         | 0.0000000 |              |              |
| 3933: 22   | 10 13 1 23 10 14 0 |           | 1318.4557100 | 1318.4554217 |
| 0.0002883  | -0.0003000         | 0.0000000 |              |              |
| 3934: 21   | 10 12 1 22 10 13 0 |           | 1318.7200200 | 1318.7204036 |
| -0.0003836 | -0.0003000         | 0.0000000 |              |              |
| 3935: 20   | 10 11 1 21 10 12 0 |           | 1318.9851300 | 1318.9852736 |
| -0.0001436 | -0.0003000         | 0.0000000 |              |              |
| 3936: 19   | 10 10 1 20 10 11 0 |           | 1319.2497600 | 1319.2500303 |
| -0.0002703 | -0.0003000         | 0.0000000 |              |              |
| 3937: 18   | 10 9 1 19 10 10 0  |           | 1319.5143800 | 1319.5146723 |
| -0.0002923 | -0.0003000         | 0.0000000 |              |              |
| 3938: 17   | 10 8 1 18 10 9 0   |           | 1319.7791100 | 1319.7791983 |
| -0.0000883 | -0.0003000         | 0.0000000 |              |              |
| 3939: 16   | 10 7 1 17 10 8 0   |           | 1320.0437000 | 1320.0436068 |
| 0.0000932  | -0.0003000         | 0.0000000 |              |              |
| 3940: 15   | 10 6 1 16 10 7 0   |           | 1320.3077700 | 1320.3078965 |
| -0.0001265 | -0.0003000         | 0.0000000 |              |              |
| 3941: 12   | 10 3 1 11 10 2 0   |           | 1327.6547300 | 1327.6546714 |
| 0.0000586  | -0.0003000         | 0.0000000 |              |              |
| 3942: 13   | 10 4 1 12 10 3 0   |           | 1327.9153200 | 1327.9149834 |
| 0.0003366  | -0.0003000         | 0.0000000 |              |              |
| 3943: 14   | 10 5 1 13 10 4 0   |           | 1328.1751600 | 1328.1751417 |
| 0.0000183  | -0.0003000         | 0.0000000 |              |              |
| 3944: 15   | 10 6 1 14 10 5 0   |           | 1328.4352800 | 1328.4351454 |
| 0.0001346  | -0.0003000         | 0.0000000 |              |              |
| 3945: 16   | 10 7 1 15 10 6 0   |           | 1328.6953400 | 1328.6949934 |
| 0.0003466  | -0.0003000         | 0.0000000 |              |              |
| 3946: 17   | 10 8 1 16 10 7 0   |           | 1328.9543200 | 1328.9546848 |
| -0.0003648 | -0.0003000         | 0.0000000 |              |              |
| 3947: 18   | 10 9 1 17 10 8 0   |           | 1329.2140200 | 1329.2142185 |
| -0.0001985 | -0.0003000         | 0.0000000 |              |              |
| 3948: 19   | 10 10 1 18 10 9 0  |           | 1329.4733200 | 1329.4735937 |
| -0.0002737 | -0.0003000         | 0.0000000 |              |              |
| 3949: 20   | 10 11 1 19 10 10 0 |           | 1329.7324700 | 1329.7328093 |
| -0.0003393 | -0.0003000         | 0.0000000 |              |              |
| 3950: 21   | 10 12 1 20 10 11 0 |           | 1329.9914900 | 1329.9918645 |
| -0.0003745 | -0.0003000         | 0.0000000 |              |              |
| 3951: 22   | 10 13 1 21 10 12 0 |           | 1330.2507200 | 1330.2507582 |
| -0.0000382 | -0.0003000         | 0.0000000 |              |              |
| 3952: 23   | 10 14 1 22 10 13 0 |           | 1330.5095200 | 1330.5094895 |
| 0.0000305  | -0.0003000         | 0.0000000 |              |              |
| 3953: 24   | 10 15 1 23 10 14 0 |           | 1330.7680500 | 1330.7680574 |
| -0.0000074 | -0.0003000         | 0.0000000 |              |              |
| 3954: 25   | 10 16 1 24 10 15 0 |           | 1331.0264200 | 1331.0264611 |
| -0.0000411 | -0.0003000         | 0.0000000 |              |              |
| 3955: 26   | 10 17 1 25 10 16 0 |           | 1331.2845400 | 1331.2846996 |
| -0.0001596 | -0.0003000         | 0.0000000 |              |              |
| 3956: 27   | 10 18 1 26 10 17 0 |           | 1331.5424800 | 1331.5427720 |
| -0.0002920 | -0.0003000         | 0.0000000 |              |              |
| 3957: 28   | 10 19 1 27 10 18 0 |           | 1331.8006100 | 1331.8006773 |
| -0.0000673 | -0.0003000         | 0.0000000 |              |              |
| 3958: 29   | 10 20 1 28 10 19 0 |           | 1332.0583500 | 1332.0584147 |
| -0.0000647 | -0.0003000         | 0.0000000 |              |              |
| 3959: 30   | 10 21 1 29 10 20 0 |           | 1332.3159900 | 1332.3159832 |
| 0.0000068  | -0.0003000         | 0.0000000 |              |              |
| 3960: 31   | 10 22 1 30 10 21 0 |           | 1332.5735800 | 1332.5733820 |
| 0.0001980  | -0.0003000         | 0.0000000 |              |              |
| 3961: 32   | 10 23 1 31 10 22 0 |           | 1332.8304900 | 1332.8306100 |
| -0.0001200 | -0.0003000         | 0.0000000 |              |              |
| 3962: 33   | 10 24 1 32 10 23 0 |           | 1333.0879600 | 1333.0876665 |
| 0.0002935  | -0.0003000         | 0.0000000 |              |              |

|            |            |           |    |   |    |    |    |   |              |              |
|------------|------------|-----------|----|---|----|----|----|---|--------------|--------------|
| 3963:      | 34         | 10        | 25 | 1 | 33 | 10 | 24 | 0 | 1333.3444300 | 1333.3445505 |
| -0.0001205 | -0.0003000 | 0.0000000 |    |   |    |    |    |   |              |              |
| 3964:      | 35         | 10        | 26 | 1 | 34 | 10 | 25 | 0 | 1333.6012100 | 1333.6012611 |
| -0.0000511 | -0.0003000 | 0.0000000 |    |   |    |    |    |   |              |              |
| 3965:      | 36         | 10        | 27 | 1 | 35 | 10 | 26 | 0 | 1333.8577400 | 1333.8577975 |
| -0.0000575 | -0.0003000 | 0.0000000 |    |   |    |    |    |   |              |              |
| 3966:      | 37         | 10        | 28 | 1 | 36 | 10 | 27 | 0 | 1334.1143700 | 1334.1141587 |
| 0.0002113  | -0.0003000 | 0.0000000 |    |   |    |    |    |   |              |              |
| 3967:      | 38         | 10        | 29 | 1 | 37 | 10 | 28 | 0 | 1334.3704000 | 1334.3703438 |
| 0.0000562  | -0.0003000 | 0.0000000 |    |   |    |    |    |   |              |              |
| 3968:      | 39         | 10        | 30 | 1 | 38 | 10 | 29 | 0 | 1334.6264000 | 1334.6263520 |
| 0.0000480  | -0.0003000 | 0.0000000 |    |   |    |    |    |   |              |              |
| 3969:      | 40         | 10        | 31 | 1 | 39 | 10 | 30 | 0 | 1334.8821500 | 1334.8821823 |
| -0.0000323 | -0.0003000 | 0.0000000 |    |   |    |    |    |   |              |              |
| 3970:      | 41         | 10        | 32 | 1 | 40 | 10 | 31 | 0 | 1335.1377500 | 1335.1378339 |
| -0.0000839 | -0.0003000 | 0.0000000 |    |   |    |    |    |   |              |              |
| 3971:      | 42         | 10        | 33 | 1 | 41 | 10 | 32 | 0 | 1335.3933300 | 1335.3933060 |
| 0.0000240  | -0.0003000 | 0.0000000 |    |   |    |    |    |   |              |              |
| 3972:      | 43         | 10        | 34 | 1 | 42 | 10 | 33 | 0 | 1335.6485900 | 1335.6485976 |
| -0.0000076 | -0.0003000 | 0.0000000 |    |   |    |    |    |   |              |              |
| 3973:      | 44         | 10        | 35 | 1 | 43 | 10 | 34 | 0 | 1335.9036900 | 1335.9037078 |
| -0.0000178 | -0.0003000 | 0.0000000 |    |   |    |    |    |   |              |              |
| 3974:      | 45         | 10        | 36 | 1 | 44 | 10 | 35 | 0 | 1336.1587700 | 1336.1586358 |
| 0.0001342  | -0.0003000 | 0.0000000 |    |   |    |    |    |   |              |              |
| 3975:      | 46         | 10        | 37 | 1 | 45 | 10 | 36 | 0 | 1336.4135100 | 1336.4133806 |
| 0.0001294  | -0.0003000 | 0.0000000 |    |   |    |    |    |   |              |              |
| 3976:      | 47         | 10        | 38 | 1 | 46 | 10 | 37 | 0 | 1336.6680300 | 1336.6679415 |
| 0.0000885  | -0.0003000 | 0.0000000 |    |   |    |    |    |   |              |              |
| 3977:      | 48         | 10        | 39 | 1 | 47 | 10 | 38 | 0 | 1336.9225100 | 1336.9223175 |
| 0.0001925  | -0.0003000 | 0.0000000 |    |   |    |    |    |   |              |              |
| 3978:      | 49         | 10        | 40 | 1 | 48 | 10 | 39 | 0 | 1337.1766300 | 1337.1765078 |
| 0.0001222  | -0.0003000 | 0.0000000 |    |   |    |    |    |   |              |              |
| 3979:      | 50         | 10        | 41 | 1 | 49 | 10 | 40 | 0 | 1337.4306100 | 1337.4305115 |
| 0.0000985  | -0.0003000 | 0.0000000 |    |   |    |    |    |   |              |              |
| 3980:      | 51         | 10        | 42 | 1 | 50 | 10 | 41 | 0 | 1337.6842200 | 1337.6843277 |
| -0.0001077 | -0.0003000 | 0.0000000 |    |   |    |    |    |   |              |              |
| 3981:      | 52         | 10        | 43 | 1 | 51 | 10 | 42 | 0 | 1337.9379100 | 1337.9379556 |
| -0.0000456 | -0.0003000 | 0.0000000 |    |   |    |    |    |   |              |              |
| 3982:      | 53         | 10        | 44 | 1 | 52 | 10 | 43 | 0 | 1338.1914200 | 1338.1913943 |
| 0.0000257  | -0.0003000 | 0.0000000 |    |   |    |    |    |   |              |              |
| 3983:      | 54         | 10        | 45 | 1 | 53 | 10 | 44 | 0 | 1338.4446600 | 1338.4446429 |
| 0.0000171  | -0.0003000 | 0.0000000 |    |   |    |    |    |   |              |              |
| 3984:      | 55         | 10        | 46 | 1 | 54 | 10 | 45 | 0 | 1338.6978000 | 1338.6977005 |
| 0.0000995  | -0.0003000 | 0.0000000 |    |   |    |    |    |   |              |              |
| 3985:      | 56         | 10        | 47 | 1 | 55 | 10 | 46 | 0 | 1338.9503900 | 1338.9505664 |
| -0.0001764 | -0.0003000 | 0.0000000 |    |   |    |    |    |   |              |              |
| 3986:      | 57         | 10        | 48 | 1 | 56 | 10 | 47 | 0 | 1339.2031000 | 1339.2032396 |
| -0.0001396 | -0.0003000 | 0.0000000 |    |   |    |    |    |   |              |              |
| 3987:      | 58         | 10        | 49 | 1 | 57 | 10 | 48 | 0 | 1339.4558100 | 1339.4557193 |
| 0.0000907  | -0.0003000 | 0.0000000 |    |   |    |    |    |   |              |              |
| 3988:      | 59         | 10        | 50 | 1 | 58 | 10 | 49 | 0 | 1339.7079800 | 1339.7080046 |
| -0.0000246 | -0.0003000 | 0.0000000 |    |   |    |    |    |   |              |              |
| 3989:      | 60         | 10        | 51 | 1 | 59 | 10 | 50 | 0 | 1339.9599300 | 1339.9600947 |
| -0.0001647 | -0.0003000 | 0.0000000 |    |   |    |    |    |   |              |              |
| 3990:      | 61         | 10        | 52 | 1 | 60 | 10 | 51 | 0 | 1340.2121400 | 1340.2119887 |
| 0.0001513  | -0.0003000 | 0.0000000 |    |   |    |    |    |   |              |              |
| 3991:      | 62         | 10        | 53 | 1 | 61 | 10 | 52 | 0 | 1340.4637600 | 1340.4636859 |
| 0.0000741  | -0.0003000 | 0.0000000 |    |   |    |    |    |   |              |              |
| 3992:      | 63         | 10        | 54 | 1 | 62 | 10 | 53 | 0 | 1340.7150700 | 1340.7151853 |
| -0.0001153 | -0.0003000 | 0.0000000 |    |   |    |    |    |   |              |              |
| 3993:      | 64         | 10        | 55 | 1 | 63 | 10 | 54 | 0 | 1340.9663100 | 1340.9664861 |
| -0.0001761 | -0.0003000 | 0.0000000 |    |   |    |    |    |   |              |              |
| 3994:      | 65         | 10        | 56 | 1 | 64 | 10 | 55 | 0 | 1341.2175900 | 1341.2175874 |
| 0.0000026  | -0.0003000 | 0.0000000 |    |   |    |    |    |   |              |              |
| 3995:      | 66         | 10        | 57 | 1 | 65 | 10 | 56 | 0 | 1341.4687200 | 1341.4684886 |

|            |            |           |       |                             |
|------------|------------|-----------|-------|-----------------------------|
| 0.0002314  | -0.0003000 | 0.0000000 |       |                             |
| 3996: 67   | 10 58      | 1 66      | 10 57 | 0 1341.7194500 1341.7191887 |
| 0.0002613  | -0.0003000 | 0.0000000 |       |                             |
| 3997: 69   | 10 60      | 1 68      | 10 59 | 0 1342.2205000 1342.2199824 |
| 0.0005176  | -0.0003000 | 0.0000000 |       |                             |
| 3998: 70   | 10 61      | 1 69      | 10 60 | 0 1342.4700800 1342.4700745 |
| 0.0000055  | -0.0003000 | 0.0000000 |       |                             |
| 3999: 71   | 10 62      | 1 70      | 10 61 | 0 1342.7201300 1342.7199623 |
| 0.0001677  | -0.0003000 | 0.0000000 |       |                             |
| 4000: 72   | 10 63      | 1 71      | 10 62 | 0 1342.9696800 1342.9696450 |
| 0.0000350  | -0.0003000 | 0.0000000 |       |                             |
| 4001: 73   | 10 64      | 1 72      | 10 63 | 0 1343.2193600 1343.2191219 |
| 0.0002381  | -0.0003000 | 0.0000000 |       |                             |
| 4002: 74   | 10 65      | 1 73      | 10 64 | 0 1343.4684700 1343.4683922 |
| 0.0000778  | -0.0003000 | 0.0000000 |       |                             |
| 4003: 75   | 10 66      | 1 74      | 10 65 | 0 1343.7173900 1343.7174552 |
| -0.0000652 | -0.0003000 | 0.0000000 |       |                             |
| 4004: 76   | 10 67      | 1 75      | 10 66 | 0 1343.9664500 1343.9663100 |
| 0.0001400  | -0.0003000 | 0.0000000 |       |                             |
| 4005: 77   | 10 68      | 1 76      | 10 67 | 0 1344.2148100 1344.2149559 |
| -0.0001459 | -0.0003000 | 0.0000000 |       |                             |
| 4006: 78   | 10 69      | 1 77      | 10 68 | 0 1344.4634900 1344.4633923 |
| 0.0000977  | -0.0003000 | 0.0000000 |       |                             |
| 4007: 79   | 10 70      | 1 78      | 10 69 | 0 1344.7120200 1344.7116183 |
| 0.0004017  | -0.0003000 | 0.0000000 |       |                             |
| 4008: 80   | 10 71      | 1 79      | 10 70 | 0 1344.9595000 1344.9596333 |
| -0.0001333 | -0.0003000 | 0.0000000 |       |                             |
| 4009: 81   | 10 72      | 1 80      | 10 71 | 0 1345.2078100 1345.2074366 |
| 0.0003734  | -0.0003000 | 0.0000000 |       |                             |
| 4010: 82   | 10 73      | 1 81      | 10 72 | 0 1345.4549200 1345.4550274 |
| -0.0001074 | -0.0003000 | 0.0000000 |       |                             |
| 4011: 83   | 10 74      | 1 82      | 10 73 | 0 1345.7029300 1345.7024050 |
| 0.0005250  | -0.0003000 | 0.0000000 |       |                             |
| 4012: 84   | 10 75      | 1 83      | 10 74 | 0 1345.9497400 1345.9495687 |
| 0.0001713  | -0.0003000 | 0.0000000 |       |                             |
| 4013: 85   | 10 76      | 1 84      | 10 75 | 0 1346.1970900 1346.1965179 |
| 0.0005721  | -0.0003000 | 0.0000000 |       |                             |
| 4014: 88   | 10 79      | 1 87      | 10 78 | 0 1346.9370400 1346.9360711 |
| 0.0009689  | -0.0003000 | 0.0000000 |       |                             |
| 4015: 86   | 11 75      | 1 87      | 11 76 | 0 1301.1259500 1301.1260867 |
| -0.0001367 | -0.0003000 | 0.0000000 |       |                             |
| 4016: 85   | 11 74      | 1 86      | 11 75 | 0 1301.3939500 1301.3944383 |
| -0.0004883 | -0.0003000 | 0.0000000 |       |                             |
| 4017: 84   | 11 73      | 1 85      | 11 74 | 0 1301.6621700 1301.6627975 |
| -0.0006275 | -0.0003000 | 0.0000000 |       |                             |
| 4018: 83   | 11 72      | 1 84      | 11 73 | 0 1301.9306700 1301.9311624 |
| -0.0004924 | -0.0003000 | 0.0000000 |       |                             |
| 4019: 82   | 11 71      | 1 83      | 11 72 | 0 1302.1992700 1302.1995309 |
| -0.0002609 | -0.0003000 | 0.0000000 |       |                             |
| 4020: 81   | 11 70      | 1 82      | 11 71 | 0 1302.4670200 1302.4679008 |
| -0.0008808 | -0.0003000 | 0.0000000 |       |                             |
| 4021: 80   | 11 69      | 1 81      | 11 70 | 0 1302.7364300 1302.7362703 |
| 0.0001597  | -0.0003000 | 0.0000000 |       |                             |
| 4022: 79   | 11 68      | 1 80      | 11 69 | 0 1303.0046000 1303.0046373 |
| -0.0000373 | -0.0003000 | 0.0000000 |       |                             |
| 4023: 78   | 11 67      | 1 79      | 11 68 | 0 1303.2730700 1303.2729998 |
| 0.0000702  | -0.0003000 | 0.0000000 |       |                             |
| 4024: 77   | 11 66      | 1 78      | 11 67 | 0 1303.5412500 1303.5413556 |
| -0.0001056 | -0.0003000 | 0.0000000 |       |                             |
| 4025: 76   | 11 65      | 1 77      | 11 66 | 0 1303.8095700 1303.8097029 |
| -0.0001329 | -0.0003000 | 0.0000000 |       |                             |
| 4026: 75   | 11 64      | 1 76      | 11 65 | 0 1304.0779600 1304.0780397 |
| -0.0000797 | -0.0003000 | 0.0000000 |       |                             |
| 4027: 74   | 11 63      | 1 75      | 11 64 | 0 1304.3459100 1304.3463638 |
| -0.0004538 | -0.0003000 | 0.0000000 |       |                             |

|            |            |           |    |   |    |    |    |   |              |              |
|------------|------------|-----------|----|---|----|----|----|---|--------------|--------------|
| 4028:      | 73         | 11        | 62 | 1 | 74 | 11 | 63 | 0 | 1304.6144500 | 1304.6146734 |
| -0.0002234 | -0.0003000 | 0.0000000 |    |   |    |    |    |   |              |              |
| 4029:      | 72         | 11        | 61 | 1 | 73 | 11 | 62 | 0 | 1304.8832400 | 1304.8829664 |
| 0.0002736  | -0.0003000 | 0.0000000 |    |   |    |    |    |   |              |              |
| 4030:      | 70         | 11        | 59 | 1 | 71 | 11 | 60 | 0 | 1305.4195000 | 1305.4194949 |
| 0.0000051  | -0.0003000 | 0.0000000 |    |   |    |    |    |   |              |              |
| 4031:      | 69         | 11        | 58 | 1 | 70 | 11 | 59 | 0 | 1305.6879500 | 1305.6877263 |
| 0.0002237  | -0.0003000 | 0.0000000 |    |   |    |    |    |   |              |              |
| 4032:      | 67         | 11        | 56 | 1 | 68 | 11 | 57 | 0 | 1306.2241100 | 1306.2241140 |
| -0.0000040 | -0.0003000 | 0.0000000 |    |   |    |    |    |   |              |              |
| 4033:      | 66         | 11        | 55 | 1 | 67 | 11 | 56 | 0 | 1306.4920500 | 1306.4922662 |
| -0.0002162 | -0.0003000 | 0.0000000 |    |   |    |    |    |   |              |              |
| 4034:      | 65         | 11        | 54 | 1 | 66 | 11 | 55 | 0 | 1306.7606800 | 1306.7603881 |
| 0.0002919  | -0.0003000 | 0.0000000 |    |   |    |    |    |   |              |              |
| 4035:      | 64         | 11        | 53 | 1 | 65 | 11 | 54 | 0 | 1307.0285200 | 1307.0284778 |
| 0.0000422  | -0.0003000 | 0.0000000 |    |   |    |    |    |   |              |              |
| 4036:      | 63         | 11        | 52 | 1 | 64 | 11 | 53 | 0 | 1307.2962700 | 1307.2965334 |
| -0.0002634 | -0.0003000 | 0.0000000 |    |   |    |    |    |   |              |              |
| 4037:      | 62         | 11        | 51 | 1 | 63 | 11 | 52 | 0 | 1307.5646300 | 1307.5645528 |
| 0.0000772  | -0.0003000 | 0.0000000 |    |   |    |    |    |   |              |              |
| 4038:      | 61         | 11        | 50 | 1 | 62 | 11 | 51 | 0 | 1307.8324100 | 1307.8325342 |
| -0.0001242 | -0.0003000 | 0.0000000 |    |   |    |    |    |   |              |              |
| 4039:      | 60         | 11        | 49 | 1 | 61 | 11 | 50 | 0 | 1308.1004200 | 1308.1004757 |
| -0.0000557 | -0.0003000 | 0.0000000 |    |   |    |    |    |   |              |              |
| 4040:      | 59         | 11        | 48 | 1 | 60 | 11 | 49 | 0 | 1308.3683200 | 1308.3683754 |
| -0.0000554 | -0.0003000 | 0.0000000 |    |   |    |    |    |   |              |              |
| 4041:      | 58         | 11        | 47 | 1 | 59 | 11 | 48 | 0 | 1308.6361500 | 1308.6362313 |
| -0.0000813 | -0.0003000 | 0.0000000 |    |   |    |    |    |   |              |              |
| 4042:      | 57         | 11        | 46 | 1 | 58 | 11 | 47 | 0 | 1308.9039700 | 1308.9040417 |
| -0.0000717 | -0.0003000 | 0.0000000 |    |   |    |    |    |   |              |              |
| 4043:      | 56         | 11        | 45 | 1 | 57 | 11 | 46 | 0 | 1309.1717900 | 1309.1718046 |
| -0.0000146 | -0.0003000 | 0.0000000 |    |   |    |    |    |   |              |              |
| 4044:      | 55         | 11        | 44 | 1 | 56 | 11 | 45 | 0 | 1309.4394800 | 1309.4395181 |
| -0.0000381 | -0.0003000 | 0.0000000 |    |   |    |    |    |   |              |              |
| 4045:      | 54         | 11        | 43 | 1 | 55 | 11 | 44 | 0 | 1309.7071700 | 1309.7071805 |
| -0.0000105 | -0.0003000 | 0.0000000 |    |   |    |    |    |   |              |              |
| 4046:      | 53         | 11        | 42 | 1 | 54 | 11 | 43 | 0 | 1309.9748800 | 1309.9747898 |
| 0.0000902  | -0.0003000 | 0.0000000 |    |   |    |    |    |   |              |              |
| 4047:      | 52         | 11        | 41 | 1 | 53 | 11 | 42 | 0 | 1310.2423600 | 1310.2423441 |
| 0.0000159  | -0.0003000 | 0.0000000 |    |   |    |    |    |   |              |              |
| 4048:      | 51         | 11        | 40 | 1 | 52 | 11 | 41 | 0 | 1310.5100000 | 1310.5098418 |
| 0.0001582  | -0.0003000 | 0.0000000 |    |   |    |    |    |   |              |              |
| 4049:      | 50         | 11        | 39 | 1 | 51 | 11 | 40 | 0 | 1310.7773400 | 1310.7772809 |
| 0.0000591  | -0.0003000 | 0.0000000 |    |   |    |    |    |   |              |              |
| 4050:      | 49         | 11        | 38 | 1 | 50 | 11 | 39 | 0 | 1311.0445500 | 1311.0446596 |
| -0.0001096 | -0.0003000 | 0.0000000 |    |   |    |    |    |   |              |              |
| 4051:      | 48         | 11        | 37 | 1 | 49 | 11 | 38 | 0 | 1311.3121200 | 1311.3119761 |
| 0.0001439  | -0.0003000 | 0.0000000 |    |   |    |    |    |   |              |              |
| 4052:      | 47         | 11        | 36 | 1 | 48 | 11 | 37 | 0 | 1311.5791000 | 1311.5792286 |
| -0.0001286 | -0.0003000 | 0.0000000 |    |   |    |    |    |   |              |              |
| 4053:      | 46         | 11        | 35 | 1 | 47 | 11 | 36 | 0 | 1311.8464200 | 1311.8464154 |
| 0.0000046  | -0.0003000 | 0.0000000 |    |   |    |    |    |   |              |              |
| 4054:      | 45         | 11        | 34 | 1 | 46 | 11 | 35 | 0 | 1312.1134700 | 1312.1135346 |
| -0.0000646 | -0.0003000 | 0.0000000 |    |   |    |    |    |   |              |              |
| 4055:      | 44         | 11        | 33 | 1 | 45 | 11 | 34 | 0 | 1312.3806000 | 1312.3805845 |
| 0.0000155  | -0.0003000 | 0.0000000 |    |   |    |    |    |   |              |              |
| 4056:      | 43         | 11        | 32 | 1 | 44 | 11 | 33 | 0 | 1312.6474200 | 1312.6475633 |
| -0.0001433 | -0.0003000 | 0.0000000 |    |   |    |    |    |   |              |              |
| 4057:      | 42         | 11        | 31 | 1 | 43 | 11 | 32 | 0 | 1312.9146100 | 1312.9144692 |
| 0.0001408  | -0.0003000 | 0.0000000 |    |   |    |    |    |   |              |              |
| 4058:      | 41         | 11        | 30 | 1 | 42 | 11 | 31 | 0 | 1313.1812500 | 1313.1813006 |
| -0.0000506 | -0.0003000 | 0.0000000 |    |   |    |    |    |   |              |              |
| 4059:      | 40         | 11        | 29 | 1 | 41 | 11 | 30 | 0 | 1313.4482800 | 1313.4480557 |
| 0.0002243  | -0.0003000 | 0.0000000 |    |   |    |    |    |   |              |              |
| 4060:      | 39         | 11        | 28 | 1 | 40 | 11 | 29 | 0 | 1313.7147000 | 1313.7147328 |

|            |            |           |              |              |
|------------|------------|-----------|--------------|--------------|
| -0.0000328 | -0.0003000 | 0.0000000 |              |              |
| 4061:      | 38         | 11        | 27           | 1 39 11 28 0 |
| 0.0001999  | -0.0003000 | 0.0000000 | 1313.9815300 | 1313.9813301 |
| 4062:      | 37         | 11        | 26           | 1 38 11 27 0 |
| -0.0002860 | -0.0003000 | 0.0000000 | 1314.2475600 | 1314.2478460 |
| 4063:      | 36         | 11        | 25           | 1 37 11 26 0 |
| -0.0000987 | -0.0003000 | 0.0000000 | 1314.5141800 | 1314.5142787 |
| 4064:      | 35         | 11        | 24           | 1 36 11 25 0 |
| -0.0001567 | -0.0003000 | 0.0000000 | 1314.7804700 | 1314.7806267 |
| 4065:      | 34         | 11        | 23           | 1 35 11 24 0 |
| -0.0000882 | -0.0003000 | 0.0000000 | 1315.0468000 | 1315.0468882 |
| 4066:      | 33         | 11        | 22           | 1 34 11 23 0 |
| 0.0001785  | -0.0003000 | 0.0000000 | 1315.3132400 | 1315.3130615 |
| 4067:      | 32         | 11        | 21           | 1 33 11 22 0 |
| -0.0002851 | -0.0003000 | 0.0000000 | 1315.5788600 | 1315.5791451 |
| 4068:      | 31         | 11        | 20           | 1 32 11 21 0 |
| -0.0002772 | -0.0003000 | 0.0000000 | 1315.8448600 | 1315.8451372 |
| 4069:      | 30         | 11        | 19           | 1 31 11 20 0 |
| -0.0001163 | -0.0003000 | 0.0000000 | 1316.1109200 | 1316.1110363 |
| 4070:      | 29         | 11        | 18           | 1 30 11 19 0 |
| -0.0005108 | -0.0003000 | 0.0000000 | 1316.3763300 | 1316.3768408 |
| 4071:      | 28         | 11        | 17           | 1 29 11 18 0 |
| -0.0003890 | -0.0003000 | 0.0000000 | 1316.6421600 | 1316.6425490 |
| 4072:      | 27         | 11        | 16           | 1 28 11 17 0 |
| -0.0001993 | -0.0003000 | 0.0000000 | 1316.9079600 | 1316.9081593 |
| 4073:      | 26         | 11        | 15           | 1 27 11 16 0 |
| -0.0003503 | -0.0003000 | 0.0000000 | 1317.1733200 | 1317.1736703 |
| 4074:      | 25         | 11        | 14           | 1 26 11 15 0 |
| -0.0003202 | -0.0003000 | 0.0000000 | 1317.4387600 | 1317.4390802 |
| 4075:      | 24         | 11        | 13           | 1 25 11 14 0 |
| -0.0002475 | -0.0003000 | 0.0000000 | 1317.7041400 | 1317.7043875 |
| 4076:      | 23         | 11        | 12           | 1 24 11 13 0 |
| -0.0000007 | -0.0003000 | 0.0000000 | 1317.9695900 | 1317.9695907 |
| 4077:      | 22         | 11        | 11           | 1 23 11 12 0 |
| 0.0000617  | -0.0003000 | 0.0000000 | 1318.2347500 | 1318.2346883 |
| 4078:      | 21         | 11        | 10           | 1 22 11 11 0 |
| 0.0001113  | -0.0003000 | 0.0000000 | 1318.4997900 | 1318.4996787 |
| 4079:      | 20         | 11        | 9            | 1 21 11 10 0 |
| -0.0002304 | -0.0003000 | 0.0000000 | 1318.7643300 | 1318.7645604 |
| 4080:      | 19         | 11        | 8            | 1 20 11 9 0  |
| -0.0000719 | -0.0003000 | 0.0000000 | 1319.0292600 | 1319.0293319 |
| 4081:      | 18         | 11        | 7            | 1 19 11 8 0  |
| 0.0001983  | -0.0003000 | 0.0000000 | 1319.2941900 | 1319.2939917 |
| 4082:      | 17         | 11        | 6            | 1 18 11 7 0  |
| 0.0002217  | -0.0003000 | 0.0000000 | 1319.5587600 | 1319.5585383 |
| 4083:      | 16         | 11        | 5            | 1 17 11 6 0  |
| 0.0001898  | -0.0003000 | 0.0000000 | 1319.8231600 | 1319.8229702 |
| 4084:      | 15         | 11        | 4            | 1 16 11 5 0  |
| -0.0002760 | -0.0003000 | 0.0000000 | 1320.0870100 | 1320.0872860 |
| 4085:      | 14         | 11        | 3            | 1 15 11 4 0  |
| -0.0001743 | -0.0003000 | 0.0000000 | 1320.3513100 | 1320.3514843 |
| 4086:      | 13         | 11        | 2            | 1 14 11 3 0  |
| 0.0000465  | -0.0003000 | 0.0000000 | 1320.6156100 | 1320.6155635 |
| 4087:      | 12         | 11        | 1            | 1 13 11 2 0  |
| -0.0001123 | -0.0003000 | 0.0000000 | 1320.8794100 | 1320.8795223 |
| 4088:      | 12         | 11        | 1            | 1 11 11 0 0  |
| 0.0005339  | -0.0003000 | 0.0000000 | 1327.4358900 | 1327.4353561 |
| 4089:      | 13         | 11        | 2            | 1 12 11 1 0  |
| 0.0001885  | -0.0003000 | 0.0000000 | 1327.6959000 | 1327.6957115 |
| 4090:      | 14         | 11        | 3            | 1 13 11 2 0  |
| -0.0000313 | -0.0003000 | 0.0000000 | 1327.9558800 | 1327.9559113 |
| 4091:      | 15         | 11        | 4            | 1 14 11 3 0  |
| 0.0000859  | -0.0003000 | 0.0000000 | 1328.2160400 | 1328.2159541 |
| 4092:      | 16         | 11        | 5            | 1 15 11 4 0  |
| -0.0000289 | -0.0003000 | 0.0000000 | 1328.4758100 | 1328.4758389 |

|       |            |            |           |   |    |    |    |   |              |              |
|-------|------------|------------|-----------|---|----|----|----|---|--------------|--------------|
| 4093: | 17         | 11         | 6         | 1 | 16 | 11 | 5  | 0 | 1328.7358400 | 1328.7355644 |
|       | 0.0002756  | -0.0003000 | 0.0000000 |   |    |    |    |   |              |              |
| 4094: | 18         | 11         | 7         | 1 | 17 | 11 | 6  | 0 | 1328.9950400 | 1328.9951293 |
|       | -0.0000893 | -0.0003000 | 0.0000000 |   |    |    |    |   |              |              |
| 4095: | 19         | 11         | 8         | 1 | 18 | 11 | 7  | 0 | 1329.2544000 | 1329.2545326 |
|       | -0.0001326 | -0.0003000 | 0.0000000 |   |    |    |    |   |              |              |
| 4096: | 20         | 11         | 9         | 1 | 19 | 11 | 8  | 0 | 1329.5137200 | 1329.5137730 |
|       | -0.0000530 | -0.0003000 | 0.0000000 |   |    |    |    |   |              |              |
| 4097: | 21         | 11         | 10        | 1 | 20 | 11 | 9  | 0 | 1329.7727800 | 1329.7728494 |
|       | -0.0000694 | -0.0003000 | 0.0000000 |   |    |    |    |   |              |              |
| 4098: | 22         | 11         | 11        | 1 | 21 | 11 | 10 | 0 | 1330.0315700 | 1330.0317606 |
|       | -0.0001906 | -0.0003000 | 0.0000000 |   |    |    |    |   |              |              |
| 4099: | 23         | 11         | 12        | 1 | 22 | 11 | 11 | 0 | 1330.2902800 | 1330.2905054 |
|       | -0.0002254 | -0.0003000 | 0.0000000 |   |    |    |    |   |              |              |
| 4100: | 24         | 11         | 13        | 1 | 23 | 11 | 12 | 0 | 1330.5490600 | 1330.5490826 |
|       | -0.0000226 | -0.0003000 | 0.0000000 |   |    |    |    |   |              |              |
| 4101: | 25         | 11         | 14        | 1 | 24 | 11 | 13 | 0 | 1330.8076800 | 1330.8074911 |
|       | 0.0001889  | -0.0003000 | 0.0000000 |   |    |    |    |   |              |              |
| 4102: | 26         | 11         | 15        | 1 | 25 | 11 | 14 | 0 | 1331.0657900 | 1331.0657297 |
|       | 0.0000603  | -0.0003000 | 0.0000000 |   |    |    |    |   |              |              |
| 4103: | 27         | 11         | 16        | 1 | 26 | 11 | 15 | 0 | 1331.3238300 | 1331.3237973 |
|       | 0.0000327  | -0.0003000 | 0.0000000 |   |    |    |    |   |              |              |
| 4104: | 28         | 11         | 17        | 1 | 27 | 11 | 16 | 0 | 1331.5817600 | 1331.5816926 |
|       | 0.0000674  | -0.0003000 | 0.0000000 |   |    |    |    |   |              |              |
| 4105: | 29         | 11         | 18        | 1 | 28 | 11 | 17 | 0 | 1331.8394700 | 1331.8394146 |
|       | 0.0000554  | -0.0003000 | 0.0000000 |   |    |    |    |   |              |              |
| 4106: | 30         | 11         | 19        | 1 | 29 | 11 | 18 | 0 | 1332.0970800 | 1332.0969621 |
|       | 0.0001179  | -0.0003000 | 0.0000000 |   |    |    |    |   |              |              |
| 4107: | 31         | 11         | 20        | 1 | 30 | 11 | 19 | 0 | 1332.3543500 | 1332.3543338 |
|       | 0.0000162  | -0.0003000 | 0.0000000 |   |    |    |    |   |              |              |
| 4108: | 32         | 11         | 21        | 1 | 31 | 11 | 20 | 0 | 1332.6115900 | 1332.6115288 |
|       | 0.0000612  | -0.0003000 | 0.0000000 |   |    |    |    |   |              |              |
| 4109: | 33         | 11         | 22        | 1 | 32 | 11 | 21 | 0 | 1332.8685800 | 1332.8685457 |
|       | 0.0000343  | -0.0003000 | 0.0000000 |   |    |    |    |   |              |              |
| 4110: | 34         | 11         | 23        | 1 | 33 | 11 | 22 | 0 | 1333.1257000 | 1333.1253835 |
|       | 0.0003165  | -0.0003000 | 0.0000000 |   |    |    |    |   |              |              |
| 4111: | 35         | 11         | 24        | 1 | 34 | 11 | 23 | 0 | 1333.3822800 | 1333.3820410 |
|       | 0.0002390  | -0.0003000 | 0.0000000 |   |    |    |    |   |              |              |
| 4112: | 36         | 11         | 25        | 1 | 35 | 11 | 24 | 0 | 1333.6384100 | 1333.6385170 |
|       | -0.0001070 | -0.0003000 | 0.0000000 |   |    |    |    |   |              |              |
| 4113: | 37         | 11         | 26        | 1 | 36 | 11 | 25 | 0 | 1333.8945800 | 1333.8948105 |
|       | -0.0002305 | -0.0003000 | 0.0000000 |   |    |    |    |   |              |              |
| 4114: | 41         | 11         | 30        | 1 | 40 | 11 | 29 | 0 | 1334.9180100 | 1334.9181350 |
|       | -0.0001250 | -0.0003000 | 0.0000000 |   |    |    |    |   |              |              |
| 4115: | 42         | 11         | 31        | 1 | 41 | 11 | 30 | 0 | 1335.1735200 | 1335.1734981 |
|       | 0.0000219  | -0.0003000 | 0.0000000 |   |    |    |    |   |              |              |
| 4116: | 43         | 11         | 32        | 1 | 42 | 11 | 31 | 0 | 1335.4286300 | 1335.4286716 |
|       | -0.0000416 | -0.0003000 | 0.0000000 |   |    |    |    |   |              |              |
| 4117: | 48         | 11         | 37        | 1 | 47 | 11 | 36 | 0 | 1336.7017700 | 1336.7016551 |
|       | 0.0001149  | -0.0003000 | 0.0000000 |   |    |    |    |   |              |              |
| 4118: | 49         | 11         | 38        | 1 | 48 | 11 | 37 | 0 | 1336.9555300 | 1336.9556668 |
|       | -0.0001368 | -0.0003000 | 0.0000000 |   |    |    |    |   |              |              |
| 4119: | 50         | 11         | 39        | 1 | 49 | 11 | 38 | 0 | 1337.2095300 | 1337.2094808 |
|       | 0.0000492  | -0.0003000 | 0.0000000 |   |    |    |    |   |              |              |
| 4120: | 51         | 11         | 40        | 1 | 50 | 11 | 39 | 0 | 1337.4634100 | 1337.4630959 |
|       | 0.0003141  | -0.0003000 | 0.0000000 |   |    |    |    |   |              |              |
| 4121: | 52         | 11         | 41        | 1 | 51 | 11 | 40 | 0 | 1337.7165900 | 1337.7165110 |
|       | 0.0000790  | -0.0003000 | 0.0000000 |   |    |    |    |   |              |              |
| 4122: | 53         | 11         | 42        | 1 | 52 | 11 | 41 | 0 | 1337.9697800 | 1337.9697247 |
|       | 0.0000553  | -0.0003000 | 0.0000000 |   |    |    |    |   |              |              |
| 4123: | 54         | 11         | 43        | 1 | 53 | 11 | 42 | 0 | 1338.2226700 | 1338.2227361 |
|       | -0.0000661 | -0.0003000 | 0.0000000 |   |    |    |    |   |              |              |
| 4124: | 55         | 11         | 44        | 1 | 54 | 11 | 43 | 0 | 1338.4755500 | 1338.4755437 |
|       | 0.0000063  | -0.0003000 | 0.0000000 |   |    |    |    |   |              |              |
| 4125: | 56         | 11         | 45        | 1 | 55 | 11 | 44 | 0 | 1338.7282600 | 1338.7281466 |

|            |            |           |       |                             |
|------------|------------|-----------|-------|-----------------------------|
| 0.0001134  | -0.0003000 | 0.0000000 |       |                             |
| 4126: 57   | 11 46      | 1 56      | 11 45 | 0 1338.9807800 1338.9805434 |
| 0.0002366  | -0.0003000 | 0.0000000 |       |                             |
| 4127: 58   | 11 47      | 1 57      | 11 46 | 0 1339.2327800 1339.2327330 |
| 0.0000470  | -0.0003000 | 0.0000000 |       |                             |
| 4128: 59   | 11 48      | 1 58      | 11 47 | 0 1339.4845300 1339.4847142 |
| -0.0001842 | -0.0003000 | 0.0000000 |       |                             |
| 4129: 60   | 11 49      | 1 59      | 11 48 | 0 1339.7361000 1339.7364858 |
| -0.0003858 | -0.0003000 | 0.0000000 |       |                             |
| 4130: 61   | 11 50      | 1 60      | 11 49 | 0 1339.9881800 1339.9880465 |
| 0.0001335  | -0.0003000 | 0.0000000 |       |                             |
| 4131: 62   | 11 51      | 1 61      | 11 50 | 0 1340.2393200 1340.2393952 |
| -0.0000752 | -0.0003000 | 0.0000000 |       |                             |
| 4132: 63   | 11 52      | 1 62      | 11 51 | 0 1340.4903400 1340.4905306 |
| -0.0001906 | -0.0003000 | 0.0000000 |       |                             |
| 4133: 64   | 11 53      | 1 63      | 11 52 | 0 1340.7413200 1340.7414515 |
| -0.0001315 | -0.0003000 | 0.0000000 |       |                             |
| 4134: 65   | 11 54      | 1 64      | 11 53 | 0 1340.9922800 1340.9921568 |
| 0.0001232  | -0.0003000 | 0.0000000 |       |                             |
| 4135: 66   | 11 55      | 1 65      | 11 54 | 0 1341.2426500 1341.2426452 |
| 0.0000048  | -0.0003000 | 0.0000000 |       |                             |
| 4136: 68   | 11 57      | 1 67      | 11 56 | 0 1341.7430100 1341.7429662 |
| 0.0000438  | -0.0003000 | 0.0000000 |       |                             |
| 4137: 69   | 11 58      | 1 68      | 11 57 | 0 1341.9927600 1341.9927965 |
| -0.0000365 | -0.0003000 | 0.0000000 |       |                             |
| 4138: 70   | 11 59      | 1 69      | 11 58 | 0 1342.2422800 1342.2424049 |
| -0.0001249 | -0.0003000 | 0.0000000 |       |                             |
| 4139: 71   | 11 60      | 1 70      | 11 59 | 0 1342.4915700 1342.4917903 |
| -0.0002203 | -0.0003000 | 0.0000000 |       |                             |
| 4140: 82   | 11 71      | 1 81      | 11 70 | 0 1345.2203300 1345.2199543 |
| 0.0003757  | -0.0003000 | 0.0000000 |       |                             |
| 4141: 83   | 11 72      | 1 82      | 11 71 | 0 1345.4667600 1345.4665667 |
| 0.0001933  | -0.0003000 | 0.0000000 |       |                             |
| 4142: 85   | 11 74      | 1 84      | 11 73 | 0 1345.9589600 1345.9590728 |
| -0.0001128 | -0.0003000 | 0.0000000 |       |                             |
| 4143: 86   | 11 75      | 1 85      | 11 74 | 0 1346.2050200 1346.2049642 |
| 0.0000558  | -0.0003000 | 0.0000000 |       |                             |
| 4144: 87   | 11 76      | 1 86      | 11 75 | 0 1346.4508200 1346.4506129 |
| 0.0002071  | -0.0003000 | 0.0000000 |       |                             |
| 4145: 88   | 11 77      | 1 87      | 11 76 | 0 1346.6959800 1346.6960177 |
| -0.0000377 | -0.0003000 | 0.0000000 |       |                             |
| 4146: 89   | 11 78      | 1 88      | 11 77 | 0 1346.9411700 1346.9411774 |
| -0.0000074 | -0.0003000 | 0.0000000 |       |                             |
| 4147: 86   | 11 76      | 1 87      | 11 77 | 0 1301.1259500 1301.1260878 |
| -0.0001378 | -0.0003000 | 0.0000000 |       |                             |
| 4148: 85   | 11 75      | 1 86      | 11 76 | 0 1301.3939500 1301.3944392 |
| -0.0004892 | -0.0003000 | 0.0000000 |       |                             |
| 4149: 84   | 11 74      | 1 85      | 11 75 | 0 1301.6621700 1301.6627983 |
| -0.0006283 | -0.0003000 | 0.0000000 |       |                             |
| 4150: 83   | 11 73      | 1 84      | 11 74 | 0 1301.9306700 1301.9311630 |
| -0.0004930 | -0.0003000 | 0.0000000 |       |                             |
| 4151: 82   | 11 72      | 1 83      | 11 73 | 0 1302.1992700 1302.1995313 |
| -0.0002613 | -0.0003000 | 0.0000000 |       |                             |
| 4152: 81   | 11 71      | 1 82      | 11 72 | 0 1302.4670200 1302.4679012 |
| -0.0008812 | -0.0003000 | 0.0000000 |       |                             |
| 4153: 80   | 11 70      | 1 81      | 11 71 | 0 1302.7364300 1302.7362706 |
| 0.0001594  | -0.0003000 | 0.0000000 |       |                             |
| 4154: 79   | 11 69      | 1 80      | 11 70 | 0 1303.0046000 1303.0046376 |
| -0.0000376 | -0.0003000 | 0.0000000 |       |                             |
| 4155: 78   | 11 68      | 1 79      | 11 69 | 0 1303.2730700 1303.2729999 |
| 0.0000701  | -0.0003000 | 0.0000000 |       |                             |
| 4156: 77   | 11 67      | 1 78      | 11 68 | 0 1303.5412500 1303.5413558 |
| -0.0001058 | -0.0003000 | 0.0000000 |       |                             |
| 4157: 76   | 11 66      | 1 77      | 11 67 | 0 1303.8095700 1303.8097030 |
| -0.0001330 | -0.0003000 | 0.0000000 |       |                             |

|            |            |           |    |   |    |    |    |   |              |              |
|------------|------------|-----------|----|---|----|----|----|---|--------------|--------------|
| 4158:      | 75         | 11        | 65 | 1 | 76 | 11 | 66 | 0 | 1304.0779600 | 1304.0780398 |
| -0.0000798 | -0.0003000 | 0.0000000 |    |   |    |    |    |   |              |              |
| 4159:      | 74         | 11        | 64 | 1 | 75 | 11 | 65 | 0 | 1304.3459100 | 1304.3463639 |
| -0.0004539 | -0.0003000 | 0.0000000 |    |   |    |    |    |   |              |              |
| 4160:      | 73         | 11        | 63 | 1 | 74 | 11 | 64 | 0 | 1304.6144500 | 1304.6146735 |
| -0.0002235 | -0.0003000 | 0.0000000 |    |   |    |    |    |   |              |              |
| 4161:      | 72         | 11        | 62 | 1 | 73 | 11 | 63 | 0 | 1304.8832400 | 1304.8829665 |
| 0.0002735  | -0.0003000 | 0.0000000 |    |   |    |    |    |   |              |              |
| 4162:      | 70         | 11        | 60 | 1 | 71 | 11 | 61 | 0 | 1305.4195000 | 1305.4194949 |
| 0.0000051  | -0.0003000 | 0.0000000 |    |   |    |    |    |   |              |              |
| 4163:      | 69         | 11        | 59 | 1 | 70 | 11 | 60 | 0 | 1305.6879500 | 1305.6877264 |
| 0.0002236  | -0.0003000 | 0.0000000 |    |   |    |    |    |   |              |              |
| 4164:      | 67         | 11        | 57 | 1 | 68 | 11 | 58 | 0 | 1306.2241100 | 1306.2241140 |
| -0.0000040 | -0.0003000 | 0.0000000 |    |   |    |    |    |   |              |              |
| 4165:      | 66         | 11        | 56 | 1 | 67 | 11 | 57 | 0 | 1306.4920500 | 1306.4922662 |
| -0.0002162 | -0.0003000 | 0.0000000 |    |   |    |    |    |   |              |              |
| 4166:      | 65         | 11        | 55 | 1 | 66 | 11 | 56 | 0 | 1306.7606800 | 1306.7603882 |
| 0.0002918  | -0.0003000 | 0.0000000 |    |   |    |    |    |   |              |              |
| 4167:      | 64         | 11        | 54 | 1 | 65 | 11 | 55 | 0 | 1307.0285200 | 1307.0284778 |
| 0.0000422  | -0.0003000 | 0.0000000 |    |   |    |    |    |   |              |              |
| 4168:      | 63         | 11        | 53 | 1 | 64 | 11 | 54 | 0 | 1307.2962700 | 1307.2965334 |
| -0.0002634 | -0.0003000 | 0.0000000 |    |   |    |    |    |   |              |              |
| 4169:      | 62         | 11        | 52 | 1 | 63 | 11 | 53 | 0 | 1307.5646300 | 1307.5645528 |
| 0.0000772  | -0.0003000 | 0.0000000 |    |   |    |    |    |   |              |              |
| 4170:      | 61         | 11        | 51 | 1 | 62 | 11 | 52 | 0 | 1307.8324100 | 1307.8325342 |
| -0.0001242 | -0.0003000 | 0.0000000 |    |   |    |    |    |   |              |              |
| 4171:      | 60         | 11        | 50 | 1 | 61 | 11 | 51 | 0 | 1308.1004200 | 1308.1004757 |
| -0.0000557 | -0.0003000 | 0.0000000 |    |   |    |    |    |   |              |              |
| 4172:      | 59         | 11        | 49 | 1 | 60 | 11 | 50 | 0 | 1308.3683200 | 1308.3683754 |
| -0.0000554 | -0.0003000 | 0.0000000 |    |   |    |    |    |   |              |              |
| 4173:      | 58         | 11        | 48 | 1 | 59 | 11 | 49 | 0 | 1308.6361500 | 1308.6362313 |
| -0.0000813 | -0.0003000 | 0.0000000 |    |   |    |    |    |   |              |              |
| 4174:      | 57         | 11        | 47 | 1 | 58 | 11 | 48 | 0 | 1308.9039700 | 1308.9040417 |
| -0.0000717 | -0.0003000 | 0.0000000 |    |   |    |    |    |   |              |              |
| 4175:      | 56         | 11        | 46 | 1 | 57 | 11 | 47 | 0 | 1309.1717900 | 1309.1718046 |
| -0.0000146 | -0.0003000 | 0.0000000 |    |   |    |    |    |   |              |              |
| 4176:      | 55         | 11        | 45 | 1 | 56 | 11 | 46 | 0 | 1309.4394800 | 1309.4395181 |
| -0.0000381 | -0.0003000 | 0.0000000 |    |   |    |    |    |   |              |              |
| 4177:      | 54         | 11        | 44 | 1 | 55 | 11 | 45 | 0 | 1309.7071700 | 1309.7071805 |
| -0.0000105 | -0.0003000 | 0.0000000 |    |   |    |    |    |   |              |              |
| 4178:      | 53         | 11        | 43 | 1 | 54 | 11 | 44 | 0 | 1309.9748800 | 1309.9747898 |
| 0.0000902  | -0.0003000 | 0.0000000 |    |   |    |    |    |   |              |              |
| 4179:      | 52         | 11        | 42 | 1 | 53 | 11 | 43 | 0 | 1310.2423600 | 1310.2423441 |
| 0.0000159  | -0.0003000 | 0.0000000 |    |   |    |    |    |   |              |              |
| 4180:      | 51         | 11        | 41 | 1 | 52 | 11 | 42 | 0 | 1310.5100000 | 1310.5098418 |
| 0.0001582  | -0.0003000 | 0.0000000 |    |   |    |    |    |   |              |              |
| 4181:      | 50         | 11        | 40 | 1 | 51 | 11 | 41 | 0 | 1310.7773400 | 1310.7772809 |
| 0.0000591  | -0.0003000 | 0.0000000 |    |   |    |    |    |   |              |              |
| 4182:      | 49         | 11        | 39 | 1 | 50 | 11 | 40 | 0 | 1311.0445500 | 1311.0446596 |
| -0.0001096 | -0.0003000 | 0.0000000 |    |   |    |    |    |   |              |              |
| 4183:      | 48         | 11        | 38 | 1 | 49 | 11 | 39 | 0 | 1311.3121200 | 1311.3119761 |
| 0.0001439  | -0.0003000 | 0.0000000 |    |   |    |    |    |   |              |              |
| 4184:      | 47         | 11        | 37 | 1 | 48 | 11 | 38 | 0 | 1311.5791000 | 1311.5792286 |
| -0.0001286 | -0.0003000 | 0.0000000 |    |   |    |    |    |   |              |              |
| 4185:      | 46         | 11        | 36 | 1 | 47 | 11 | 37 | 0 | 1311.8464200 | 1311.8464154 |
| 0.0000046  | -0.0003000 | 0.0000000 |    |   |    |    |    |   |              |              |
| 4186:      | 45         | 11        | 35 | 1 | 46 | 11 | 36 | 0 | 1312.1134700 | 1312.1135346 |
| -0.0000646 | -0.0003000 | 0.0000000 |    |   |    |    |    |   |              |              |
| 4187:      | 44         | 11        | 34 | 1 | 45 | 11 | 35 | 0 | 1312.3806000 | 1312.3805845 |
| 0.0000155  | -0.0003000 | 0.0000000 |    |   |    |    |    |   |              |              |
| 4188:      | 43         | 11        | 33 | 1 | 44 | 11 | 34 | 0 | 1312.6474200 | 1312.6475633 |
| -0.0001433 | -0.0003000 | 0.0000000 |    |   |    |    |    |   |              |              |
| 4189:      | 42         | 11        | 32 | 1 | 43 | 11 | 33 | 0 | 1312.9146100 | 1312.9144692 |
| 0.0001408  | -0.0003000 | 0.0000000 |    |   |    |    |    |   |              |              |
| 4190:      | 41         | 11        | 31 | 1 | 42 | 11 | 32 | 0 | 1313.1812500 | 1313.1813006 |

|            |                    |           |              |              |
|------------|--------------------|-----------|--------------|--------------|
| -0.0000506 | -0.0003000         | 0.0000000 |              |              |
| 4191: 40   | 11 30 1 41 11 31 0 |           | 1313.4482800 | 1313.4480557 |
| 0.0002243  | -0.0003000         | 0.0000000 |              |              |
| 4192: 39   | 11 29 1 40 11 30 0 |           | 1313.7147000 | 1313.7147328 |
| -0.0000328 | -0.0003000         | 0.0000000 |              |              |
| 4193: 38   | 11 28 1 39 11 29 0 |           | 1313.9815300 | 1313.9813301 |
| 0.0001999  | -0.0003000         | 0.0000000 |              |              |
| 4194: 37   | 11 27 1 38 11 28 0 |           | 1314.2475600 | 1314.2478460 |
| -0.0002860 | -0.0003000         | 0.0000000 |              |              |
| 4195: 36   | 11 26 1 37 11 27 0 |           | 1314.5141800 | 1314.5142787 |
| -0.0000987 | -0.0003000         | 0.0000000 |              |              |
| 4196: 35   | 11 25 1 36 11 26 0 |           | 1314.7804700 | 1314.7806267 |
| -0.0001567 | -0.0003000         | 0.0000000 |              |              |
| 4197: 34   | 11 24 1 35 11 25 0 |           | 1315.0468000 | 1315.0468882 |
| -0.0000882 | -0.0003000         | 0.0000000 |              |              |
| 4198: 33   | 11 23 1 34 11 24 0 |           | 1315.3132400 | 1315.3130615 |
| 0.0001785  | -0.0003000         | 0.0000000 |              |              |
| 4199: 32   | 11 22 1 33 11 23 0 |           | 1315.5788600 | 1315.5791451 |
| -0.0002851 | -0.0003000         | 0.0000000 |              |              |
| 4200: 31   | 11 21 1 32 11 22 0 |           | 1315.8448600 | 1315.8451372 |
| -0.0002772 | -0.0003000         | 0.0000000 |              |              |
| 4201: 30   | 11 20 1 31 11 21 0 |           | 1316.1109200 | 1316.1110363 |
| -0.0001163 | -0.0003000         | 0.0000000 |              |              |
| 4202: 29   | 11 19 1 30 11 20 0 |           | 1316.3763300 | 1316.3768408 |
| -0.0005108 | -0.0003000         | 0.0000000 |              |              |
| 4203: 28   | 11 18 1 29 11 19 0 |           | 1316.6421600 | 1316.6425490 |
| -0.0003890 | -0.0003000         | 0.0000000 |              |              |
| 4204: 27   | 11 17 1 28 11 18 0 |           | 1316.9079600 | 1316.9081593 |
| -0.0001993 | -0.0003000         | 0.0000000 |              |              |
| 4205: 26   | 11 16 1 27 11 17 0 |           | 1317.1733200 | 1317.1736703 |
| -0.0003503 | -0.0003000         | 0.0000000 |              |              |
| 4206: 25   | 11 15 1 26 11 16 0 |           | 1317.4387600 | 1317.4390802 |
| -0.0003202 | -0.0003000         | 0.0000000 |              |              |
| 4207: 24   | 11 14 1 25 11 15 0 |           | 1317.7041400 | 1317.7043875 |
| -0.0002475 | -0.0003000         | 0.0000000 |              |              |
| 4208: 23   | 11 13 1 24 11 14 0 |           | 1317.9695900 | 1317.9695907 |
| -0.0000007 | -0.0003000         | 0.0000000 |              |              |
| 4209: 22   | 11 12 1 23 11 13 0 |           | 1318.2347500 | 1318.2346883 |
| 0.0000617  | -0.0003000         | 0.0000000 |              |              |
| 4210: 21   | 11 11 1 22 11 12 0 |           | 1318.4997900 | 1318.4996787 |
| 0.0001113  | -0.0003000         | 0.0000000 |              |              |
| 4211: 20   | 11 10 1 21 11 11 0 |           | 1318.7643300 | 1318.7645604 |
| -0.0002304 | -0.0003000         | 0.0000000 |              |              |
| 4212: 19   | 11 9 1 20 11 10 0  |           | 1319.0292600 | 1319.0293319 |
| -0.0000719 | -0.0003000         | 0.0000000 |              |              |
| 4213: 18   | 11 8 1 19 11 9 0   |           | 1319.2941900 | 1319.2939917 |
| 0.0001983  | -0.0003000         | 0.0000000 |              |              |
| 4214: 17   | 11 7 1 18 11 8 0   |           | 1319.5587600 | 1319.5585383 |
| 0.0002217  | -0.0003000         | 0.0000000 |              |              |
| 4215: 16   | 11 6 1 17 11 7 0   |           | 1319.8231600 | 1319.8229702 |
| 0.0001898  | -0.0003000         | 0.0000000 |              |              |
| 4216: 15   | 11 5 1 16 11 6 0   |           | 1320.0870100 | 1320.0872860 |
| -0.0002760 | -0.0003000         | 0.0000000 |              |              |
| 4217: 14   | 11 4 1 15 11 5 0   |           | 1320.3513100 | 1320.3514843 |
| -0.0001743 | -0.0003000         | 0.0000000 |              |              |
| 4218: 13   | 11 3 1 14 11 4 0   |           | 1320.6156100 | 1320.6155635 |
| 0.0000465  | -0.0003000         | 0.0000000 |              |              |
| 4219: 12   | 11 2 1 13 11 3 0   |           | 1320.8794100 | 1320.8795223 |
| -0.0001123 | -0.0003000         | 0.0000000 |              |              |
| 4220: 11   | 11 1 1 12 11 2 0   |           | 1321.1436300 | 1321.1433592 |
| 0.0002708  | -0.0003000         | 0.0000000 |              |              |
| 4221: 12   | 11 2 1 11 11 1 0   |           | 1327.4358900 | 1327.4353561 |
| 0.0005339  | -0.0003000         | 0.0000000 |              |              |
| 4222: 13   | 11 3 1 12 11 2 0   |           | 1327.6959000 | 1327.6957115 |
| 0.0001885  | -0.0003000         | 0.0000000 |              |              |

|            |            |           |    |   |    |    |    |   |              |              |
|------------|------------|-----------|----|---|----|----|----|---|--------------|--------------|
| 4223:      | 14         | 11        | 4  | 1 | 13 | 11 | 3  | 0 | 1327.9558800 | 1327.9559113 |
| -0.0000313 | -0.0003000 | 0.0000000 |    |   |    |    |    |   |              |              |
| 4224:      | 15         | 11        | 5  | 1 | 14 | 11 | 4  | 0 | 1328.2160400 | 1328.2159541 |
| 0.0000859  | -0.0003000 | 0.0000000 |    |   |    |    |    |   |              |              |
| 4225:      | 16         | 11        | 6  | 1 | 15 | 11 | 5  | 0 | 1328.4758100 | 1328.4758389 |
| -0.0000289 | -0.0003000 | 0.0000000 |    |   |    |    |    |   |              |              |
| 4226:      | 17         | 11        | 7  | 1 | 16 | 11 | 6  | 0 | 1328.7358400 | 1328.7355644 |
| 0.0002756  | -0.0003000 | 0.0000000 |    |   |    |    |    |   |              |              |
| 4227:      | 18         | 11        | 8  | 1 | 17 | 11 | 7  | 0 | 1328.9950400 | 1328.9951293 |
| -0.0000893 | -0.0003000 | 0.0000000 |    |   |    |    |    |   |              |              |
| 4228:      | 19         | 11        | 9  | 1 | 18 | 11 | 8  | 0 | 1329.2544000 | 1329.2545326 |
| -0.0001326 | -0.0003000 | 0.0000000 |    |   |    |    |    |   |              |              |
| 4229:      | 20         | 11        | 10 | 1 | 19 | 11 | 9  | 0 | 1329.5137200 | 1329.5137730 |
| -0.0000530 | -0.0003000 | 0.0000000 |    |   |    |    |    |   |              |              |
| 4230:      | 21         | 11        | 11 | 1 | 20 | 11 | 10 | 0 | 1329.7727800 | 1329.7728494 |
| -0.0000694 | -0.0003000 | 0.0000000 |    |   |    |    |    |   |              |              |
| 4231:      | 22         | 11        | 12 | 1 | 21 | 11 | 11 | 0 | 1330.0315700 | 1330.0317606 |
| -0.0001906 | -0.0003000 | 0.0000000 |    |   |    |    |    |   |              |              |
| 4232:      | 23         | 11        | 13 | 1 | 22 | 11 | 12 | 0 | 1330.2902800 | 1330.2905054 |
| -0.0002254 | -0.0003000 | 0.0000000 |    |   |    |    |    |   |              |              |
| 4233:      | 24         | 11        | 14 | 1 | 23 | 11 | 13 | 0 | 1330.5490600 | 1330.5490826 |
| -0.0000226 | -0.0003000 | 0.0000000 |    |   |    |    |    |   |              |              |
| 4234:      | 25         | 11        | 15 | 1 | 24 | 11 | 14 | 0 | 1330.8076800 | 1330.8074911 |
| 0.0001889  | -0.0003000 | 0.0000000 |    |   |    |    |    |   |              |              |
| 4235:      | 26         | 11        | 16 | 1 | 25 | 11 | 15 | 0 | 1331.0657900 | 1331.0657297 |
| 0.0000603  | -0.0003000 | 0.0000000 |    |   |    |    |    |   |              |              |
| 4236:      | 27         | 11        | 17 | 1 | 26 | 11 | 16 | 0 | 1331.3238300 | 1331.3237973 |
| 0.0000327  | -0.0003000 | 0.0000000 |    |   |    |    |    |   |              |              |
| 4237:      | 28         | 11        | 18 | 1 | 27 | 11 | 17 | 0 | 1331.5817600 | 1331.5816926 |
| 0.0000674  | -0.0003000 | 0.0000000 |    |   |    |    |    |   |              |              |
| 4238:      | 29         | 11        | 19 | 1 | 28 | 11 | 18 | 0 | 1331.8394700 | 1331.8394146 |
| 0.0000554  | -0.0003000 | 0.0000000 |    |   |    |    |    |   |              |              |
| 4239:      | 30         | 11        | 20 | 1 | 29 | 11 | 19 | 0 | 1332.0970800 | 1332.0969621 |
| 0.0001179  | -0.0003000 | 0.0000000 |    |   |    |    |    |   |              |              |
| 4240:      | 31         | 11        | 21 | 1 | 30 | 11 | 20 | 0 | 1332.3543500 | 1332.3543338 |
| 0.0000162  | -0.0003000 | 0.0000000 |    |   |    |    |    |   |              |              |
| 4241:      | 32         | 11        | 22 | 1 | 31 | 11 | 21 | 0 | 1332.6115900 | 1332.6115288 |
| 0.0000612  | -0.0003000 | 0.0000000 |    |   |    |    |    |   |              |              |
| 4242:      | 33         | 11        | 23 | 1 | 32 | 11 | 22 | 0 | 1332.8685800 | 1332.8685457 |
| 0.0000343  | -0.0003000 | 0.0000000 |    |   |    |    |    |   |              |              |
| 4243:      | 34         | 11        | 24 | 1 | 33 | 11 | 23 | 0 | 1333.1257000 | 1333.1253835 |
| 0.0003165  | -0.0003000 | 0.0000000 |    |   |    |    |    |   |              |              |
| 4244:      | 35         | 11        | 25 | 1 | 34 | 11 | 24 | 0 | 1333.3822800 | 1333.3820410 |
| 0.0002390  | -0.0003000 | 0.0000000 |    |   |    |    |    |   |              |              |
| 4245:      | 36         | 11        | 26 | 1 | 35 | 11 | 25 | 0 | 1333.6384100 | 1333.6385170 |
| -0.0001070 | -0.0003000 | 0.0000000 |    |   |    |    |    |   |              |              |
| 4246:      | 37         | 11        | 27 | 1 | 36 | 11 | 26 | 0 | 1333.8945800 | 1333.8948105 |
| -0.0002305 | -0.0003000 | 0.0000000 |    |   |    |    |    |   |              |              |
| 4247:      | 41         | 11        | 31 | 1 | 40 | 11 | 30 | 0 | 1334.9180100 | 1334.9181350 |
| -0.0001250 | -0.0003000 | 0.0000000 |    |   |    |    |    |   |              |              |
| 4248:      | 42         | 11        | 32 | 1 | 41 | 11 | 31 | 0 | 1335.1735200 | 1335.1734981 |
| 0.0000219  | -0.0003000 | 0.0000000 |    |   |    |    |    |   |              |              |
| 4249:      | 43         | 11        | 33 | 1 | 42 | 11 | 32 | 0 | 1335.4286300 | 1335.4286716 |
| -0.0000416 | -0.0003000 | 0.0000000 |    |   |    |    |    |   |              |              |
| 4250:      | 48         | 11        | 38 | 1 | 47 | 11 | 37 | 0 | 1336.7017700 | 1336.7016551 |
| 0.0001149  | -0.0003000 | 0.0000000 |    |   |    |    |    |   |              |              |
| 4251:      | 49         | 11        | 39 | 1 | 48 | 11 | 38 | 0 | 1336.9555300 | 1336.9556668 |
| -0.0001368 | -0.0003000 | 0.0000000 |    |   |    |    |    |   |              |              |
| 4252:      | 50         | 11        | 40 | 1 | 49 | 11 | 39 | 0 | 1337.2095300 | 1337.2094808 |
| 0.0000492  | -0.0003000 | 0.0000000 |    |   |    |    |    |   |              |              |
| 4253:      | 51         | 11        | 41 | 1 | 50 | 11 | 40 | 0 | 1337.4634100 | 1337.4630959 |
| 0.0003141  | -0.0003000 | 0.0000000 |    |   |    |    |    |   |              |              |
| 4254:      | 52         | 11        | 42 | 1 | 51 | 11 | 41 | 0 | 1337.7165900 | 1337.7165110 |
| 0.0000790  | -0.0003000 | 0.0000000 |    |   |    |    |    |   |              |              |
| 4255:      | 53         | 11        | 43 | 1 | 52 | 11 | 42 | 0 | 1337.9697800 | 1337.9697247 |

|            |            |           |              |              |
|------------|------------|-----------|--------------|--------------|
| 0.0000553  | -0.0003000 | 0.0000000 |              |              |
| 4256:      | 54         | 11        | 44           | 1 53 11 43 0 |
| -0.0000661 | -0.0003000 | 0.0000000 | 1338.2226700 | 1338.2227361 |
| 4257:      | 55         | 11        | 45           | 1 54 11 44 0 |
| 0.0000063  | -0.0003000 | 0.0000000 | 1338.4755500 | 1338.4755437 |
| 4258:      | 56         | 11        | 46           | 1 55 11 45 0 |
| 0.0001134  | -0.0003000 | 0.0000000 | 1338.7282600 | 1338.7281466 |
| 4259:      | 57         | 11        | 47           | 1 56 11 46 0 |
| 0.0002366  | -0.0003000 | 0.0000000 | 1338.9807800 | 1338.9805434 |
| 4260:      | 58         | 11        | 48           | 1 57 11 47 0 |
| 0.0000470  | -0.0003000 | 0.0000000 | 1339.2327800 | 1339.2327330 |
| 4261:      | 59         | 11        | 49           | 1 58 11 48 0 |
| -0.0001842 | -0.0003000 | 0.0000000 | 1339.4845300 | 1339.4847142 |
| 4262:      | 60         | 11        | 50           | 1 59 11 49 0 |
| -0.0003857 | -0.0003000 | 0.0000000 | 1339.7361000 | 1339.7364857 |
| 4263:      | 61         | 11        | 51           | 1 60 11 50 0 |
| 0.0001335  | -0.0003000 | 0.0000000 | 1339.9881800 | 1339.9880465 |
| 4264:      | 62         | 11        | 52           | 1 61 11 51 0 |
| -0.0000752 | -0.0003000 | 0.0000000 | 1340.2393200 | 1340.2393952 |
| 4265:      | 63         | 11        | 53           | 1 62 11 52 0 |
| -0.0001906 | -0.0003000 | 0.0000000 | 1340.4903400 | 1340.4905306 |
| 4266:      | 64         | 11        | 54           | 1 63 11 53 0 |
| -0.0001315 | -0.0003000 | 0.0000000 | 1340.7413200 | 1340.7414515 |
| 4267:      | 65         | 11        | 55           | 1 64 11 54 0 |
| 0.0001232  | -0.0003000 | 0.0000000 | 1340.9922800 | 1340.9921568 |
| 4268:      | 66         | 11        | 56           | 1 65 11 55 0 |
| 0.0000049  | -0.0003000 | 0.0000000 | 1341.2426500 | 1341.2426451 |
| 4269:      | 68         | 11        | 58           | 1 67 11 57 0 |
| 0.0000438  | -0.0003000 | 0.0000000 | 1341.7430100 | 1341.7429662 |
| 4270:      | 69         | 11        | 59           | 1 68 11 58 0 |
| -0.0000365 | -0.0003000 | 0.0000000 | 1341.9927600 | 1341.9927965 |
| 4271:      | 70         | 11        | 60           | 1 69 11 59 0 |
| -0.0001249 | -0.0003000 | 0.0000000 | 1342.2422800 | 1342.2424049 |
| 4272:      | 71         | 11        | 61           | 1 70 11 60 0 |
| -0.0002202 | -0.0003000 | 0.0000000 | 1342.4915700 | 1342.4917902 |
| 4273:      | 82         | 11        | 72           | 1 81 11 71 0 |
| 0.0003770  | -0.0003000 | 0.0000000 | 1345.2203300 | 1345.2199530 |
| 4274:      | 83         | 11        | 73           | 1 82 11 72 0 |
| 0.0001951  | -0.0003000 | 0.0000000 | 1345.4667600 | 1345.4665649 |
| 4275:      | 85         | 11        | 75           | 1 84 11 74 0 |
| -0.0001100 | -0.0003000 | 0.0000000 | 1345.9589600 | 1345.9590700 |
| 4276:      | 86         | 11        | 76           | 1 85 11 75 0 |
| 0.0000594  | -0.0003000 | 0.0000000 | 1346.2050200 | 1346.2049606 |
| 4277:      | 87         | 11        | 77           | 1 86 11 76 0 |
| 0.0002116  | -0.0003000 | 0.0000000 | 1346.4508200 | 1346.4506084 |
| 4278:      | 88         | 11        | 78           | 1 87 11 77 0 |
| -0.0000320 | -0.0003000 | 0.0000000 | 1346.6959800 | 1346.6960120 |
| 4279:      | 89         | 11        | 79           | 1 88 11 78 0 |
| -0.0000002 | -0.0003000 | 0.0000000 | 1346.9411700 | 1346.9411702 |
| 4280:      | 89         | 12        | 77           | 1 90 12 78 0 |
| 0.0001033  | -0.0003000 | 0.0000000 | 1300.0850300 | 1300.0849267 |
| 4281:      | 88         | 12        | 76           | 1 89 12 77 0 |
| -0.0000537 | -0.0003000 | 0.0000000 | 1300.3530400 | 1300.3530937 |
| 4282:      | 87         | 12        | 75           | 1 88 12 76 0 |
| 0.0000948  | -0.0003000 | 0.0000000 | 1300.6213700 | 1300.6212752 |
| 4283:      | 76         | 12        | 64           | 1 77 12 65 0 |
| -0.0001035 | -0.0003000 | 0.0000000 | 1303.5715700 | 1303.5716735 |
| 4284:      | 75         | 12        | 63           | 1 76 12 64 0 |
| -0.0000377 | -0.0003000 | 0.0000000 | 1303.8398400 | 1303.8398777 |
| 4285:      | 74         | 12        | 62           | 1 75 12 63 0 |
| 0.0001188  | -0.0003000 | 0.0000000 | 1304.1081900 | 1304.1080712 |
| 4286:      | 73         | 12        | 61           | 1 74 12 62 0 |
| -0.0001920 | -0.0003000 | 0.0000000 | 1304.3760600 | 1304.3762520 |
| 4287:      | 72         | 12        | 60           | 1 73 12 61 0 |
| -0.0002084 | -0.0003000 | 0.0000000 | 1304.6442100 | 1304.6444184 |

|            |            |           |    |   |    |    |    |   |              |              |
|------------|------------|-----------|----|---|----|----|----|---|--------------|--------------|
| 4288:      | 71         | 12        | 59 | 1 | 72 | 12 | 60 | 0 | 1304.9124900 | 1304.9125683 |
| -0.0000783 | -0.0003000 | 0.0000000 |    |   |    |    |    |   |              |              |
| 4289:      | 70         | 12        | 58 | 1 | 71 | 12 | 59 | 0 | 1305.1805400 | 1305.1806999 |
| -0.0001599 | -0.0003000 | 0.0000000 |    |   |    |    |    |   |              |              |
| 4290:      | 69         | 12        | 57 | 1 | 70 | 12 | 58 | 0 | 1305.4491700 | 1305.4488113 |
| 0.0003587  | -0.0003000 | 0.0000000 |    |   |    |    |    |   |              |              |
| 4291:      | 67         | 12        | 55 | 1 | 68 | 12 | 56 | 0 | 1305.9851800 | 1305.9849658 |
| 0.0002142  | -0.0003000 | 0.0000000 |    |   |    |    |    |   |              |              |
| 4292:      | 66         | 12        | 54 | 1 | 67 | 12 | 55 | 0 | 1306.2528900 | 1306.2530051 |
| -0.0001151 | -0.0003000 | 0.0000000 |    |   |    |    |    |   |              |              |
| 4293:      | 64         | 12        | 52 | 1 | 65 | 12 | 53 | 0 | 1306.7893800 | 1306.7889985 |
| 0.0003815  | -0.0003000 | 0.0000000 |    |   |    |    |    |   |              |              |
| 4294:      | 63         | 12        | 51 | 1 | 64 | 12 | 52 | 0 | 1307.0571300 | 1307.0569488 |
| 0.0001812  | -0.0003000 | 0.0000000 |    |   |    |    |    |   |              |              |
| 4295:      | 62         | 12        | 50 | 1 | 63 | 12 | 51 | 0 | 1307.3249600 | 1307.3248656 |
| 0.0000944  | -0.0003000 | 0.0000000 |    |   |    |    |    |   |              |              |
| 4296:      | 61         | 12        | 49 | 1 | 62 | 12 | 50 | 0 | 1307.5925500 | 1307.5927472 |
| -0.0001972 | -0.0003000 | 0.0000000 |    |   |    |    |    |   |              |              |
| 4297:      | 60         | 12        | 48 | 1 | 61 | 12 | 49 | 0 | 1307.8606000 | 1307.8605916 |
| 0.0000084  | -0.0003000 | 0.0000000 |    |   |    |    |    |   |              |              |
| 4298:      | 59         | 12        | 47 | 1 | 60 | 12 | 48 | 0 | 1308.1284200 | 1308.1283970 |
| 0.0000230  | -0.0003000 | 0.0000000 |    |   |    |    |    |   |              |              |
| 4299:      | 58         | 12        | 46 | 1 | 59 | 12 | 47 | 0 | 1308.3960300 | 1308.3961615 |
| -0.0001315 | -0.0003000 | 0.0000000 |    |   |    |    |    |   |              |              |
| 4300:      | 57         | 12        | 45 | 1 | 58 | 12 | 46 | 0 | 1308.6635300 | 1308.6638834 |
| -0.0003534 | -0.0003000 | 0.0000000 |    |   |    |    |    |   |              |              |
| 4301:      | 56         | 12        | 44 | 1 | 57 | 12 | 45 | 0 | 1308.9312900 | 1308.9315606 |
| -0.0002706 | -0.0003000 | 0.0000000 |    |   |    |    |    |   |              |              |
| 4302:      | 55         | 12        | 43 | 1 | 56 | 12 | 44 | 0 | 1309.1990200 | 1309.1991915 |
| -0.0001715 | -0.0003000 | 0.0000000 |    |   |    |    |    |   |              |              |
| 4303:      | 54         | 12        | 42 | 1 | 55 | 12 | 43 | 0 | 1309.4669800 | 1309.4667742 |
| 0.0002058  | -0.0003000 | 0.0000000 |    |   |    |    |    |   |              |              |
| 4304:      | 53         | 12        | 41 | 1 | 54 | 12 | 42 | 0 | 1309.7341800 | 1309.7343069 |
| -0.0001269 | -0.0003000 | 0.0000000 |    |   |    |    |    |   |              |              |
| 4305:      | 52         | 12        | 40 | 1 | 53 | 12 | 41 | 0 | 1310.0017700 | 1310.0017877 |
| -0.0000177 | -0.0003000 | 0.0000000 |    |   |    |    |    |   |              |              |
| 4306:      | 51         | 12        | 39 | 1 | 52 | 12 | 40 | 0 | 1310.2690900 | 1310.2692148 |
| -0.0001248 | -0.0003000 | 0.0000000 |    |   |    |    |    |   |              |              |
| 4307:      | 50         | 12        | 38 | 1 | 51 | 12 | 39 | 0 | 1310.5364700 | 1310.5365865 |
| -0.0001165 | -0.0003000 | 0.0000000 |    |   |    |    |    |   |              |              |
| 4308:      | 49         | 12        | 37 | 1 | 50 | 12 | 38 | 0 | 1310.8037500 | 1310.8039009 |
| -0.0001509 | -0.0003000 | 0.0000000 |    |   |    |    |    |   |              |              |
| 4309:      | 48         | 12        | 36 | 1 | 49 | 12 | 37 | 0 | 1311.0712900 | 1311.0711563 |
| 0.0001337  | -0.0003000 | 0.0000000 |    |   |    |    |    |   |              |              |
| 4310:      | 47         | 12        | 35 | 1 | 48 | 12 | 36 | 0 | 1311.3383300 | 1311.3383509 |
| -0.0000209 | -0.0003000 | 0.0000000 |    |   |    |    |    |   |              |              |
| 4311:      | 46         | 12        | 34 | 1 | 47 | 12 | 35 | 0 | 1311.6054000 | 1311.6054829 |
| -0.0000829 | -0.0003000 | 0.0000000 |    |   |    |    |    |   |              |              |
| 4312:      | 45         | 12        | 33 | 1 | 46 | 12 | 34 | 0 | 1311.8725000 | 1311.8725505 |
| -0.0000505 | -0.0003000 | 0.0000000 |    |   |    |    |    |   |              |              |
| 4313:      | 44         | 12        | 32 | 1 | 45 | 12 | 33 | 0 | 1312.1396000 | 1312.1395519 |
| 0.0000481  | -0.0003000 | 0.0000000 |    |   |    |    |    |   |              |              |
| 4314:      | 43         | 12        | 31 | 1 | 44 | 12 | 32 | 0 | 1312.4064700 | 1312.4064855 |
| -0.0000155 | -0.0003000 | 0.0000000 |    |   |    |    |    |   |              |              |
| 4315:      | 42         | 12        | 30 | 1 | 43 | 12 | 31 | 0 | 1312.6730800 | 1312.6733494 |
| -0.0002694 | -0.0003000 | 0.0000000 |    |   |    |    |    |   |              |              |
| 4316:      | 41         | 12        | 29 | 1 | 42 | 12 | 30 | 0 | 1312.9400700 | 1312.9401419 |
| -0.0000719 | -0.0003000 | 0.0000000 |    |   |    |    |    |   |              |              |
| 4317:      | 40         | 12        | 28 | 1 | 41 | 12 | 29 | 0 | 1313.2067900 | 1313.2068613 |
| -0.0000713 | -0.0003000 | 0.0000000 |    |   |    |    |    |   |              |              |
| 4318:      | 39         | 12        | 27 | 1 | 40 | 12 | 28 | 0 | 1313.4733600 | 1313.4735059 |
| -0.0001459 | -0.0003000 | 0.0000000 |    |   |    |    |    |   |              |              |
| 4319:      | 38         | 12        | 26 | 1 | 39 | 12 | 27 | 0 | 1313.7398500 | 1313.7400739 |
| -0.0002239 | -0.0003000 | 0.0000000 |    |   |    |    |    |   |              |              |
| 4320:      | 37         | 12        | 25 | 1 | 38 | 12 | 26 | 0 | 1314.0064300 | 1314.0065636 |

|              |            |           |    |              |
|--------------|------------|-----------|----|--------------|
| -0.0001336   | -0.0003000 | 0.0000000 |    |              |
| 4321:        | 36         | 12        | 24 | 1 37 12 25 0 |
| 1314.2726900 |            |           |    | 1314.2729734 |
| -0.0002834   | -0.0003000 | 0.0000000 |    |              |
| 4322:        | 34         | 12        | 22 | 1 35 12 23 0 |
| 1314.8056900 |            |           |    | 1314.8055462 |
| 0.0001438    | -0.0003000 | 0.0000000 |    |              |
| 4323:        | 33         | 12        | 21 | 1 34 12 22 0 |
| 1315.0716100 |            |           |    | 1315.0717059 |
| -0.0000959   | -0.0003000 | 0.0000000 |    |              |
| 4324:        | 32         | 12        | 20 | 1 33 12 21 0 |
| 1315.3372500 |            |           |    | 1315.3377789 |
| -0.0005289   | -0.0003000 | 0.0000000 |    |              |
| 4325:        | 31         | 12        | 19 | 1 32 12 20 0 |
| 1315.6036400 |            |           |    | 1315.6037635 |
| -0.0001235   | -0.0003000 | 0.0000000 |    |              |
| 4326:        | 30         | 12        | 18 | 1 31 12 19 0 |
| 1315.8699500 |            |           |    | 1315.8696580 |
| 0.0002920    | -0.0003000 | 0.0000000 |    |              |
| 4327:        | 28         | 12        | 16 | 1 29 12 17 0 |
| 1316.4012300 |            |           |    | 1316.4011704 |
| 0.0000596    | -0.0003000 | 0.0000000 |    |              |
| 4328:        | 26         | 12        | 14 | 1 27 12 15 0 |
| 1316.9323800 |            |           |    | 1316.9323030 |
| 0.0000770    | -0.0003000 | 0.0000000 |    |              |
| 4329:        | 25         | 12        | 13 | 1 26 12 14 0 |
| 1317.1974100 |            |           |    | 1317.1977227 |
| -0.0003127   | -0.0003000 | 0.0000000 |    |              |
| 4330:        | 24         | 12        | 12 | 1 25 12 13 0 |
| 1317.4632100 |            |           |    | 1317.4630427 |
| 0.0001673    | -0.0003000 | 0.0000000 |    |              |
| 4331:        | 23         | 12        | 11 | 1 24 12 12 0 |
| 1317.7282500 |            |           |    | 1317.7282612 |
| -0.0000112   | -0.0003000 | 0.0000000 |    |              |
| 4332:        | 22         | 12        | 10 | 1 23 12 11 0 |
| 1317.9934100 |            |           |    | 1317.9933768 |
| 0.0000332    | -0.0003000 | 0.0000000 |    |              |
| 4333:        | 21         | 12        | 9  | 1 22 12 10 0 |
| 1318.2585100 |            |           |    | 1318.2583877 |
| 0.0001223    | -0.0003000 | 0.0000000 |    |              |
| 4334:        | 20         | 12        | 8  | 1 21 12 9 0  |
| 1318.5230600 |            |           |    | 1318.5232924 |
| -0.0002324   | -0.0003000 | 0.0000000 |    |              |
| 4335:        | 19         | 12        | 7  | 1 20 12 8 0  |
| 1318.7882200 |            |           |    | 1318.7880894 |
| 0.0001306    | -0.0003000 | 0.0000000 |    |              |
| 4336:        | 18         | 12        | 6  | 1 19 12 7 0  |
| 1319.0529500 |            |           |    | 1319.0527771 |
| 0.0001729    | -0.0003000 | 0.0000000 |    |              |
| 4337:        | 17         | 12        | 5  | 1 18 12 6 0  |
| 1319.3177500 |            |           |    | 1319.3173540 |
| 0.0003960    | -0.0003000 | 0.0000000 |    |              |
| 4338:        | 16         | 12        | 4  | 1 17 12 5 0  |
| 1319.5815800 |            |           |    | 1319.5818184 |
| -0.0002384   | -0.0003000 | 0.0000000 |    |              |
| 4339:        | 15         | 12        | 3  | 1 16 12 4 0  |
| 1319.8463000 |            |           |    | 1319.8461689 |
| 0.0001311    | -0.0003000 | 0.0000000 |    |              |
| 4340:        | 14         | 12        | 2  | 1 15 12 3 0  |
| 1320.1100300 |            |           |    | 1320.1104039 |
| -0.0003739   | -0.0003000 | 0.0000000 |    |              |
| 4341:        | 13         | 12        | 1  | 1 14 12 2 0  |
| 1320.3745900 |            |           |    | 1320.3745219 |
| 0.0000681    | -0.0003000 | 0.0000000 |    |              |
| 4342:        | 12         | 12        | 0  | 1 13 12 1 0  |
| 1320.6388900 |            |           |    | 1320.6385213 |
| 0.0003687    | -0.0003000 | 0.0000000 |    |              |
| 4343:        | 13         | 12        | 1  | 1 12 12 0 0  |
| 1327.4559400 |            |           |    | 1327.4560979 |
| -0.0001579   | -0.0003000 | 0.0000000 |    |              |
| 4344:        | 14         | 12        | 2  | 1 13 12 1 0  |
| 1327.7162500 |            |           |    | 1327.7163479 |
| -0.0000979   | -0.0003000 | 0.0000000 |    |              |
| 4345:        | 15         | 12        | 3  | 1 14 12 2 0  |
| 1327.9764300 |            |           |    | 1327.9764395 |
| -0.0000095   | -0.0003000 | 0.0000000 |    |              |
| 4346:        | 16         | 12        | 4  | 1 15 12 3 0  |
| 1328.2358900 |            |           |    | 1328.2363713 |
| -0.0004813   | -0.0003000 | 0.0000000 |    |              |
| 4347:        | 17         | 12        | 5  | 1 16 12 4 0  |
| 1328.4958100 |            |           |    | 1328.4961419 |
| -0.0003319   | -0.0003000 | 0.0000000 |    |              |
| 4348:        | 18         | 12        | 6  | 1 17 12 5 0  |
| 1328.7558000 |            |           |    | 1328.7557500 |
| 0.0000500    | -0.0003000 | 0.0000000 |    |              |
| 4349:        | 19         | 12        | 7  | 1 18 12 6 0  |
| 1329.0151700 |            |           |    | 1329.0151942 |
| -0.0000242   | -0.0003000 | 0.0000000 |    |              |
| 4350:        | 20         | 12        | 8  | 1 19 12 7 0  |
| 1329.2743900 |            |           |    | 1329.2744732 |
| -0.0000832   | -0.0003000 | 0.0000000 |    |              |
| 4351:        | 21         | 12        | 9  | 1 20 12 8 0  |
| 1329.5336400 |            |           |    | 1329.5335855 |
| 0.0000545    | -0.0003000 | 0.0000000 |    |              |
| 4352:        | 22         | 12        | 10 | 1 21 12 9 0  |
| 1329.7925800 |            |           |    | 1329.7925300 |
| 0.0000500    | -0.0003000 | 0.0000000 |    |              |

|       |            |            |           |   |    |    |    |   |              |              |
|-------|------------|------------|-----------|---|----|----|----|---|--------------|--------------|
| 4353: | 23         | 12         | 11        | 1 | 22 | 12 | 10 | 0 | 1330.0514400 | 1330.0513052 |
|       | 0.0001348  | -0.0003000 | 0.0000000 |   |    |    |    |   |              |              |
| 4354: | 24         | 12         | 12        | 1 | 23 | 12 | 11 | 0 | 1330.3098900 | 1330.3099097 |
|       | -0.0000197 | -0.0003000 | 0.0000000 |   |    |    |    |   |              |              |
| 4355: | 25         | 12         | 13        | 1 | 24 | 12 | 12 | 0 | 1330.5684400 | 1330.5683424 |
|       | 0.0000976  | -0.0003000 | 0.0000000 |   |    |    |    |   |              |              |
| 4356: | 26         | 12         | 14        | 1 | 25 | 12 | 13 | 0 | 1330.8267200 | 1330.8266017 |
|       | 0.0001183  | -0.0003000 | 0.0000000 |   |    |    |    |   |              |              |
| 4357: | 27         | 12         | 15        | 1 | 26 | 12 | 14 | 0 | 1331.0843900 | 1331.0846863 |
|       | -0.0002963 | -0.0003000 | 0.0000000 |   |    |    |    |   |              |              |
| 4358: | 28         | 12         | 16        | 1 | 27 | 12 | 15 | 0 | 1331.3424900 | 1331.3425950 |
|       | -0.0001050 | -0.0003000 | 0.0000000 |   |    |    |    |   |              |              |
| 4359: | 29         | 12         | 17        | 1 | 28 | 12 | 16 | 0 | 1331.6002200 | 1331.6003264 |
|       | -0.0001064 | -0.0003000 | 0.0000000 |   |    |    |    |   |              |              |
| 4360: | 30         | 12         | 18        | 1 | 29 | 12 | 17 | 0 | 1331.8577200 | 1331.8578791 |
|       | -0.0001591 | -0.0003000 | 0.0000000 |   |    |    |    |   |              |              |
| 4361: | 31         | 12         | 19        | 1 | 30 | 12 | 18 | 0 | 1332.1150700 | 1332.1152518 |
|       | -0.0001818 | -0.0003000 | 0.0000000 |   |    |    |    |   |              |              |
| 4362: | 32         | 12         | 20        | 1 | 31 | 12 | 19 | 0 | 1332.3722100 | 1332.3724431 |
|       | -0.0002331 | -0.0003000 | 0.0000000 |   |    |    |    |   |              |              |
| 4363: | 33         | 12         | 21        | 1 | 32 | 12 | 20 | 0 | 1332.6293200 | 1332.6294517 |
|       | -0.0001317 | -0.0003000 | 0.0000000 |   |    |    |    |   |              |              |
| 4364: | 34         | 12         | 22        | 1 | 33 | 12 | 21 | 0 | 1332.8859000 | 1332.8862763 |
|       | -0.0003763 | -0.0003000 | 0.0000000 |   |    |    |    |   |              |              |
| 4365: | 35         | 12         | 23        | 1 | 34 | 12 | 22 | 0 | 1333.1428400 | 1333.1429155 |
|       | -0.0000755 | -0.0003000 | 0.0000000 |   |    |    |    |   |              |              |
| 4366: | 36         | 12         | 24        | 1 | 35 | 12 | 23 | 0 | 1333.3989200 | 1333.3993680 |
|       | -0.0004480 | -0.0003000 | 0.0000000 |   |    |    |    |   |              |              |
| 4367: | 38         | 12         | 26        | 1 | 37 | 12 | 25 | 0 | 1333.9114400 | 1333.9117074 |
|       | -0.0002674 | -0.0003000 | 0.0000000 |   |    |    |    |   |              |              |
| 4368: | 39         | 12         | 27        | 1 | 38 | 12 | 26 | 0 | 1334.1674800 | 1334.1675915 |
|       | -0.0001115 | -0.0003000 | 0.0000000 |   |    |    |    |   |              |              |
| 4369: | 40         | 12         | 28        | 1 | 39 | 12 | 27 | 0 | 1334.4234200 | 1334.4232835 |
|       | 0.0001365  | -0.0003000 | 0.0000000 |   |    |    |    |   |              |              |
| 4370: | 41         | 12         | 29        | 1 | 40 | 12 | 28 | 0 | 1334.6787700 | 1334.6787821 |
|       | -0.0000121 | -0.0003000 | 0.0000000 |   |    |    |    |   |              |              |
| 4371: | 42         | 12         | 30        | 1 | 41 | 12 | 29 | 0 | 1334.9341700 | 1334.9340857 |
|       | 0.0000843  | -0.0003000 | 0.0000000 |   |    |    |    |   |              |              |
| 4372: | 43         | 12         | 31        | 1 | 42 | 12 | 30 | 0 | 1335.1891900 | 1335.1891931 |
|       | -0.0000031 | -0.0003000 | 0.0000000 |   |    |    |    |   |              |              |
| 4373: | 46         | 12         | 34        | 1 | 45 | 12 | 33 | 0 | 1335.9535800 | 1335.9533242 |
|       | 0.0002558  | -0.0003000 | 0.0000000 |   |    |    |    |   |              |              |
| 4374: | 47         | 12         | 35        | 1 | 46 | 12 | 34 | 0 | 1336.2076100 | 1336.2076330 |
|       | -0.0000230 | -0.0003000 | 0.0000000 |   |    |    |    |   |              |              |
| 4375: | 48         | 12         | 36        | 1 | 47 | 12 | 35 | 0 | 1336.4619100 | 1336.4617386 |
|       | 0.0001714  | -0.0003000 | 0.0000000 |   |    |    |    |   |              |              |
| 4376: | 49         | 12         | 37        | 1 | 48 | 12 | 36 | 0 | 1336.7156300 | 1336.7156398 |
|       | -0.0000098 | -0.0003000 | 0.0000000 |   |    |    |    |   |              |              |
| 4377: | 50         | 12         | 38        | 1 | 49 | 12 | 37 | 0 | 1336.9694100 | 1336.9693350 |
|       | 0.0000750  | -0.0003000 | 0.0000000 |   |    |    |    |   |              |              |
| 4378: | 51         | 12         | 39        | 1 | 50 | 12 | 38 | 0 | 1337.2228400 | 1337.2228230 |
|       | 0.0000170  | -0.0003000 | 0.0000000 |   |    |    |    |   |              |              |
| 4379: | 55         | 12         | 43        | 1 | 54 | 12 | 42 | 0 | 1338.2349300 | 1338.2346737 |
|       | 0.0002563  | -0.0003000 | 0.0000000 |   |    |    |    |   |              |              |
| 4380: | 56         | 12         | 44        | 1 | 55 | 12 | 43 | 0 | 1338.4871200 | 1338.4871040 |
|       | 0.0000160  | -0.0003000 | 0.0000000 |   |    |    |    |   |              |              |
| 4381: | 57         | 12         | 45        | 1 | 56 | 12 | 44 | 0 | 1338.7393200 | 1338.7393186 |
|       | 0.0000014  | -0.0003000 | 0.0000000 |   |    |    |    |   |              |              |
| 4382: | 58         | 12         | 46        | 1 | 57 | 12 | 45 | 0 | 1338.9914200 | 1338.9913159 |
|       | 0.0001041  | -0.0003000 | 0.0000000 |   |    |    |    |   |              |              |
| 4383: | 59         | 12         | 47        | 1 | 58 | 12 | 46 | 0 | 1339.2430400 | 1339.2430946 |
|       | -0.0000546 | -0.0003000 | 0.0000000 |   |    |    |    |   |              |              |
| 4384: | 60         | 12         | 48        | 1 | 59 | 12 | 47 | 0 | 1339.4944700 | 1339.4946532 |
|       | -0.0001832 | -0.0003000 | 0.0000000 |   |    |    |    |   |              |              |
| 4385: | 61         | 12         | 49        | 1 | 60 | 12 | 48 | 0 | 1339.7457100 | 1339.7459902 |

|            |            |            |   |                           |
|------------|------------|------------|---|---------------------------|
| -0.0002802 | -0.0003000 | 0.0000000  |   |                           |
| 4386: 62   | 12 50      | 1 61 12 49 | 0 | 1339.9973700 1339.9971042 |
| 0.0002658  | -0.0003000 | 0.0000000  |   |                           |
| 4387: 63   | 12 51      | 1 62 12 50 | 0 | 1340.2481000 1340.2479938 |
| 0.0001062  | -0.0003000 | 0.0000000  |   |                           |
| 4388: 64   | 12 52      | 1 63 12 51 | 0 | 1340.4988200 1340.4986573 |
| 0.0001627  | -0.0003000 | 0.0000000  |   |                           |
| 4389: 65   | 12 53      | 1 64 12 52 | 0 | 1340.7491800 1340.7490935 |
| 0.0000865  | -0.0003000 | 0.0000000  |   |                           |
| 4390: 66   | 12 54      | 1 65 12 53 | 0 | 1340.9995200 1340.9993007 |
| 0.0002193  | -0.0003000 | 0.0000000  |   |                           |
| 4391: 67   | 12 55      | 1 66 12 54 | 0 | 1341.2493500 1341.2492775 |
| 0.0000725  | -0.0003000 | 0.0000000  |   |                           |
| 4392: 70   | 12 58      | 1 69 12 57 | 0 | 1341.9978800 1341.9978105 |
| 0.0000695  | -0.0003000 | 0.0000000  |   |                           |
| 4393: 71   | 12 59      | 1 70 12 58 | 0 | 1342.2469300 1342.2468507 |
| 0.0000793  | -0.0003000 | 0.0000000  |   |                           |
| 4394: 72   | 12 60      | 1 71 12 59 | 0 | 1342.4959200 1342.4956529 |
| 0.0002671  | -0.0003000 | 0.0000000  |   |                           |
| 4395: 83   | 12 71      | 1 82 12 70 | 0 | 1345.2167300 1345.2163283 |
| 0.0004017  | -0.0003000 | 0.0000000  |   |                           |
| 4396: 84   | 12 72      | 1 83 12 71 | 0 | 1345.4622300 1345.4621535 |
| 0.0000765  | -0.0003000 | 0.0000000  |   |                           |
| 4397: 85   | 12 73      | 1 84 12 72 | 0 | 1345.7078600 1345.7077202 |
| 0.0001398  | -0.0003000 | 0.0000000  |   |                           |
| 4398: 89   | 12 78      | 1 90 12 79 | 0 | 1300.0850300 1300.0849268 |
| 0.0001032  | -0.0003000 | 0.0000000  |   |                           |
| 4399: 88   | 12 77      | 1 89 12 78 | 0 | 1300.3530400 1300.3530937 |
| -0.0000537 | -0.0003000 | 0.0000000  |   |                           |
| 4400: 87   | 12 76      | 1 88 12 77 | 0 | 1300.6213700 1300.6212752 |
| 0.0000948  | -0.0003000 | 0.0000000  |   |                           |
| 4401: 76   | 12 65      | 1 77 12 66 | 0 | 1303.5715700 1303.5716735 |
| -0.0001035 | -0.0003000 | 0.0000000  |   |                           |
| 4402: 75   | 12 64      | 1 76 12 65 | 0 | 1303.8398400 1303.8398777 |
| -0.0000377 | -0.0003000 | 0.0000000  |   |                           |
| 4403: 74   | 12 63      | 1 75 12 64 | 0 | 1304.1081900 1304.1080712 |
| 0.0001188  | -0.0003000 | 0.0000000  |   |                           |
| 4404: 73   | 12 62      | 1 74 12 63 | 0 | 1304.3760600 1304.3762520 |
| -0.0001920 | -0.0003000 | 0.0000000  |   |                           |
| 4405: 72   | 12 61      | 1 73 12 62 | 0 | 1304.6442100 1304.6444184 |
| -0.0002084 | -0.0003000 | 0.0000000  |   |                           |
| 4406: 71   | 12 60      | 1 72 12 61 | 0 | 1304.9124900 1304.9125683 |
| -0.0000783 | -0.0003000 | 0.0000000  |   |                           |
| 4407: 70   | 12 59      | 1 71 12 60 | 0 | 1305.1805400 1305.1807000 |
| -0.0001600 | -0.0003000 | 0.0000000  |   |                           |
| 4408: 69   | 12 58      | 1 70 12 59 | 0 | 1305.4491700 1305.4488113 |
| 0.0003587  | -0.0003000 | 0.0000000  |   |                           |
| 4409: 67   | 12 56      | 1 68 12 57 | 0 | 1305.9851800 1305.9849658 |
| 0.0002142  | -0.0003000 | 0.0000000  |   |                           |
| 4410: 66   | 12 55      | 1 67 12 56 | 0 | 1306.2528900 1306.2530051 |
| -0.0001151 | -0.0003000 | 0.0000000  |   |                           |
| 4411: 64   | 12 53      | 1 65 12 54 | 0 | 1306.7893800 1306.7889985 |
| 0.0003815  | -0.0003000 | 0.0000000  |   |                           |
| 4412: 63   | 12 52      | 1 64 12 53 | 0 | 1307.0571300 1307.0569488 |
| 0.0001812  | -0.0003000 | 0.0000000  |   |                           |
| 4413: 62   | 12 51      | 1 63 12 52 | 0 | 1307.3249600 1307.3248656 |
| 0.0000944  | -0.0003000 | 0.0000000  |   |                           |
| 4414: 61   | 12 50      | 1 62 12 51 | 0 | 1307.5925500 1307.5927472 |
| -0.0001972 | -0.0003000 | 0.0000000  |   |                           |
| 4415: 60   | 12 49      | 1 61 12 50 | 0 | 1307.8606000 1307.8605916 |
| 0.0000084  | -0.0003000 | 0.0000000  |   |                           |
| 4416: 59   | 12 48      | 1 60 12 49 | 0 | 1308.1284200 1308.1283970 |
| 0.0000230  | -0.0003000 | 0.0000000  |   |                           |
| 4417: 58   | 12 47      | 1 59 12 48 | 0 | 1308.3960300 1308.3961615 |
| -0.0001315 | -0.0003000 | 0.0000000  |   |                           |

|            |            |           |    |   |    |    |    |   |              |              |
|------------|------------|-----------|----|---|----|----|----|---|--------------|--------------|
| 4418:      | 57         | 12        | 46 | 1 | 58 | 12 | 47 | 0 | 1308.6635300 | 1308.6638834 |
| -0.0003534 | -0.0003000 | 0.0000000 |    |   |    |    |    |   |              |              |
| 4419:      | 56         | 12        | 45 | 1 | 57 | 12 | 46 | 0 | 1308.9312900 | 1308.9315606 |
| -0.0002706 | -0.0003000 | 0.0000000 |    |   |    |    |    |   |              |              |
| 4420:      | 55         | 12        | 44 | 1 | 56 | 12 | 45 | 0 | 1309.1990200 | 1309.1991915 |
| -0.0001715 | -0.0003000 | 0.0000000 |    |   |    |    |    |   |              |              |
| 4421:      | 54         | 12        | 43 | 1 | 55 | 12 | 44 | 0 | 1309.4669800 | 1309.4667742 |
| 0.0002058  | -0.0003000 | 0.0000000 |    |   |    |    |    |   |              |              |
| 4422:      | 53         | 12        | 42 | 1 | 54 | 12 | 43 | 0 | 1309.7341800 | 1309.7343069 |
| -0.0001269 | -0.0003000 | 0.0000000 |    |   |    |    |    |   |              |              |
| 4423:      | 52         | 12        | 41 | 1 | 53 | 12 | 42 | 0 | 1310.0017700 | 1310.0017877 |
| -0.0000177 | -0.0003000 | 0.0000000 |    |   |    |    |    |   |              |              |
| 4424:      | 51         | 12        | 40 | 1 | 52 | 12 | 41 | 0 | 1310.2690900 | 1310.2692148 |
| -0.0001248 | -0.0003000 | 0.0000000 |    |   |    |    |    |   |              |              |
| 4425:      | 50         | 12        | 39 | 1 | 51 | 12 | 40 | 0 | 1310.5364700 | 1310.5365865 |
| -0.0001165 | -0.0003000 | 0.0000000 |    |   |    |    |    |   |              |              |
| 4426:      | 49         | 12        | 38 | 1 | 50 | 12 | 39 | 0 | 1310.8037500 | 1310.8039009 |
| -0.0001509 | -0.0003000 | 0.0000000 |    |   |    |    |    |   |              |              |
| 4427:      | 48         | 12        | 37 | 1 | 49 | 12 | 38 | 0 | 1311.0712900 | 1311.0711563 |
| 0.0001337  | -0.0003000 | 0.0000000 |    |   |    |    |    |   |              |              |
| 4428:      | 47         | 12        | 36 | 1 | 48 | 12 | 37 | 0 | 1311.3383300 | 1311.3383509 |
| -0.0000209 | -0.0003000 | 0.0000000 |    |   |    |    |    |   |              |              |
| 4429:      | 46         | 12        | 35 | 1 | 47 | 12 | 36 | 0 | 1311.6054000 | 1311.6054829 |
| -0.0000829 | -0.0003000 | 0.0000000 |    |   |    |    |    |   |              |              |
| 4430:      | 45         | 12        | 34 | 1 | 46 | 12 | 35 | 0 | 1311.8725000 | 1311.8725505 |
| -0.0000505 | -0.0003000 | 0.0000000 |    |   |    |    |    |   |              |              |
| 4431:      | 44         | 12        | 33 | 1 | 45 | 12 | 34 | 0 | 1312.1396000 | 1312.1395519 |
| 0.0000481  | -0.0003000 | 0.0000000 |    |   |    |    |    |   |              |              |
| 4432:      | 43         | 12        | 32 | 1 | 44 | 12 | 33 | 0 | 1312.4064700 | 1312.4064855 |
| -0.0000155 | -0.0003000 | 0.0000000 |    |   |    |    |    |   |              |              |
| 4433:      | 42         | 12        | 31 | 1 | 43 | 12 | 32 | 0 | 1312.6730800 | 1312.6733494 |
| -0.0002694 | -0.0003000 | 0.0000000 |    |   |    |    |    |   |              |              |
| 4434:      | 41         | 12        | 30 | 1 | 42 | 12 | 31 | 0 | 1312.9400700 | 1312.9401419 |
| -0.0000719 | -0.0003000 | 0.0000000 |    |   |    |    |    |   |              |              |
| 4435:      | 40         | 12        | 29 | 1 | 41 | 12 | 30 | 0 | 1313.2067900 | 1313.2068613 |
| -0.0000713 | -0.0003000 | 0.0000000 |    |   |    |    |    |   |              |              |
| 4436:      | 39         | 12        | 28 | 1 | 40 | 12 | 29 | 0 | 1313.4733600 | 1313.4735059 |
| -0.0001459 | -0.0003000 | 0.0000000 |    |   |    |    |    |   |              |              |
| 4437:      | 38         | 12        | 27 | 1 | 39 | 12 | 28 | 0 | 1313.7398500 | 1313.7400739 |
| -0.0002239 | -0.0003000 | 0.0000000 |    |   |    |    |    |   |              |              |
| 4438:      | 37         | 12        | 26 | 1 | 38 | 12 | 27 | 0 | 1314.0064300 | 1314.0065636 |
| -0.0001336 | -0.0003000 | 0.0000000 |    |   |    |    |    |   |              |              |
| 4439:      | 36         | 12        | 25 | 1 | 37 | 12 | 26 | 0 | 1314.2726900 | 1314.2729734 |
| -0.0002834 | -0.0003000 | 0.0000000 |    |   |    |    |    |   |              |              |
| 4440:      | 34         | 12        | 23 | 1 | 35 | 12 | 24 | 0 | 1314.8056900 | 1314.8055462 |
| 0.0001438  | -0.0003000 | 0.0000000 |    |   |    |    |    |   |              |              |
| 4441:      | 33         | 12        | 22 | 1 | 34 | 12 | 23 | 0 | 1315.0716100 | 1315.0717059 |
| -0.0000959 | -0.0003000 | 0.0000000 |    |   |    |    |    |   |              |              |
| 4442:      | 32         | 12        | 21 | 1 | 33 | 12 | 22 | 0 | 1315.3372500 | 1315.3377789 |
| -0.0005289 | -0.0003000 | 0.0000000 |    |   |    |    |    |   |              |              |
| 4443:      | 31         | 12        | 20 | 1 | 32 | 12 | 21 | 0 | 1315.6036400 | 1315.6037635 |
| -0.0001235 | -0.0003000 | 0.0000000 |    |   |    |    |    |   |              |              |
| 4444:      | 30         | 12        | 19 | 1 | 31 | 12 | 20 | 0 | 1315.8699500 | 1315.8696580 |
| 0.0002920  | -0.0003000 | 0.0000000 |    |   |    |    |    |   |              |              |
| 4445:      | 28         | 12        | 17 | 1 | 29 | 12 | 18 | 0 | 1316.4012300 | 1316.4011704 |
| 0.0000596  | -0.0003000 | 0.0000000 |    |   |    |    |    |   |              |              |
| 4446:      | 26         | 12        | 15 | 1 | 27 | 12 | 16 | 0 | 1316.9323800 | 1316.9323030 |
| 0.0000770  | -0.0003000 | 0.0000000 |    |   |    |    |    |   |              |              |
| 4447:      | 25         | 12        | 14 | 1 | 26 | 12 | 15 | 0 | 1317.1974100 | 1317.1977227 |
| -0.0003127 | -0.0003000 | 0.0000000 |    |   |    |    |    |   |              |              |
| 4448:      | 24         | 12        | 13 | 1 | 25 | 12 | 14 | 0 | 1317.4632100 | 1317.4630427 |
| 0.0001673  | -0.0003000 | 0.0000000 |    |   |    |    |    |   |              |              |
| 4449:      | 23         | 12        | 12 | 1 | 24 | 12 | 13 | 0 | 1317.7282500 | 1317.7282612 |
| -0.0000112 | -0.0003000 | 0.0000000 |    |   |    |    |    |   |              |              |
| 4450:      | 22         | 12        | 11 | 1 | 23 | 12 | 12 | 0 | 1317.9934100 | 1317.9933768 |

|            |            |           |              |              |
|------------|------------|-----------|--------------|--------------|
| 0.0000332  | -0.0003000 | 0.0000000 |              |              |
| 4451:      | 21         | 12        | 10           | 1 22 12 11 0 |
| 0.0001223  | -0.0003000 | 0.0000000 | 1318.2585100 | 1318.2583877 |
| 4452:      | 20         | 12        | 9            | 1 21 12 10 0 |
| -0.0002324 | -0.0003000 | 0.0000000 | 1318.5230600 | 1318.5232924 |
| 4453:      | 19         | 12        | 8            | 1 20 12 9 0  |
| 0.0001306  | -0.0003000 | 0.0000000 | 1318.7882200 | 1318.7880894 |
| 4454:      | 18         | 12        | 7            | 1 19 12 8 0  |
| 0.0001729  | -0.0003000 | 0.0000000 | 1319.0529500 | 1319.0527771 |
| 4455:      | 17         | 12        | 6            | 1 18 12 7 0  |
| 0.0003960  | -0.0003000 | 0.0000000 | 1319.3177500 | 1319.3173540 |
| 4456:      | 16         | 12        | 5            | 1 17 12 6 0  |
| -0.0002384 | -0.0003000 | 0.0000000 | 1319.5815800 | 1319.5818184 |
| 4457:      | 15         | 12        | 4            | 1 16 12 5 0  |
| 0.0001311  | -0.0003000 | 0.0000000 | 1319.8463000 | 1319.8461689 |
| 4458:      | 14         | 12        | 3            | 1 15 12 4 0  |
| -0.0003739 | -0.0003000 | 0.0000000 | 1320.1100300 | 1320.1104039 |
| 4459:      | 13         | 12        | 2            | 1 14 12 3 0  |
| 0.0000681  | -0.0003000 | 0.0000000 | 1320.3745900 | 1320.3745219 |
| 4460:      | 12         | 12        | 1            | 1 13 12 2 0  |
| 0.0003687  | -0.0003000 | 0.0000000 | 1320.6388900 | 1320.6385213 |
| 4461:      | 13         | 12        | 2            | 1 12 12 1 0  |
| -0.0001579 | -0.0003000 | 0.0000000 | 1327.4559400 | 1327.4560979 |
| 4462:      | 14         | 12        | 3            | 1 13 12 2 0  |
| -0.0000979 | -0.0003000 | 0.0000000 | 1327.7162500 | 1327.7163479 |
| 4463:      | 15         | 12        | 4            | 1 14 12 3 0  |
| -0.0000095 | -0.0003000 | 0.0000000 | 1327.9764300 | 1327.9764395 |
| 4464:      | 16         | 12        | 5            | 1 15 12 4 0  |
| -0.0004813 | -0.0003000 | 0.0000000 | 1328.2358900 | 1328.2363713 |
| 4465:      | 17         | 12        | 6            | 1 16 12 5 0  |
| -0.0003319 | -0.0003000 | 0.0000000 | 1328.4958100 | 1328.4961419 |
| 4466:      | 18         | 12        | 7            | 1 17 12 6 0  |
| 0.0000500  | -0.0003000 | 0.0000000 | 1328.7558000 | 1328.7557500 |
| 4467:      | 19         | 12        | 8            | 1 18 12 7 0  |
| -0.0000242 | -0.0003000 | 0.0000000 | 1329.0151700 | 1329.0151942 |
| 4468:      | 20         | 12        | 9            | 1 19 12 8 0  |
| -0.0000832 | -0.0003000 | 0.0000000 | 1329.2743900 | 1329.2744732 |
| 4469:      | 21         | 12        | 10           | 1 20 12 9 0  |
| 0.0000545  | -0.0003000 | 0.0000000 | 1329.5336400 | 1329.5335855 |
| 4470:      | 22         | 12        | 11           | 1 21 12 10 0 |
| 0.0000500  | -0.0003000 | 0.0000000 | 1329.7925800 | 1329.7925300 |
| 4471:      | 23         | 12        | 12           | 1 22 12 11 0 |
| 0.0001348  | -0.0003000 | 0.0000000 | 1330.0514400 | 1330.0513052 |
| 4472:      | 24         | 12        | 13           | 1 23 12 12 0 |
| -0.0000197 | -0.0003000 | 0.0000000 | 1330.3098900 | 1330.3099097 |
| 4473:      | 25         | 12        | 14           | 1 24 12 13 0 |
| 0.0000976  | -0.0003000 | 0.0000000 | 1330.5684400 | 1330.5683424 |
| 4474:      | 26         | 12        | 15           | 1 25 12 14 0 |
| 0.0001183  | -0.0003000 | 0.0000000 | 1330.8267200 | 1330.8266017 |
| 4475:      | 27         | 12        | 16           | 1 26 12 15 0 |
| -0.0002963 | -0.0003000 | 0.0000000 | 1331.0843900 | 1331.0846863 |
| 4476:      | 28         | 12        | 17           | 1 27 12 16 0 |
| -0.0001050 | -0.0003000 | 0.0000000 | 1331.3424900 | 1331.3425950 |
| 4477:      | 29         | 12        | 18           | 1 28 12 17 0 |
| -0.0001064 | -0.0003000 | 0.0000000 | 1331.6002200 | 1331.6003264 |
| 4478:      | 30         | 12        | 19           | 1 29 12 18 0 |
| -0.0001591 | -0.0003000 | 0.0000000 | 1331.8577200 | 1331.8578791 |
| 4479:      | 31         | 12        | 20           | 1 30 12 19 0 |
| -0.0001818 | -0.0003000 | 0.0000000 | 1332.1150700 | 1332.1152518 |
| 4480:      | 32         | 12        | 21           | 1 31 12 20 0 |
| -0.0002331 | -0.0003000 | 0.0000000 | 1332.3722100 | 1332.3724431 |
| 4481:      | 33         | 12        | 22           | 1 32 12 21 0 |
| -0.0001317 | -0.0003000 | 0.0000000 | 1332.6293200 | 1332.6294517 |
| 4482:      | 34         | 12        | 23           | 1 33 12 22 0 |
| -0.0003763 | -0.0003000 | 0.0000000 | 1332.8859000 | 1332.8862763 |

|            |            |           |    |   |    |    |    |   |              |              |
|------------|------------|-----------|----|---|----|----|----|---|--------------|--------------|
| 4483:      | 35         | 12        | 24 | 1 | 34 | 12 | 23 | 0 | 1333.1428400 | 1333.1429155 |
| -0.0000755 | -0.0003000 | 0.0000000 |    |   |    |    |    |   |              |              |
| 4484:      | 36         | 12        | 25 | 1 | 35 | 12 | 24 | 0 | 1333.3989200 | 1333.3993680 |
| -0.0004480 | -0.0003000 | 0.0000000 |    |   |    |    |    |   |              |              |
| 4485:      | 38         | 12        | 27 | 1 | 37 | 12 | 26 | 0 | 1333.9114400 | 1333.9117074 |
| -0.0002674 | -0.0003000 | 0.0000000 |    |   |    |    |    |   |              |              |
| 4486:      | 39         | 12        | 28 | 1 | 38 | 12 | 27 | 0 | 1334.1674800 | 1334.1675915 |
| -0.0001115 | -0.0003000 | 0.0000000 |    |   |    |    |    |   |              |              |
| 4487:      | 40         | 12        | 29 | 1 | 39 | 12 | 28 | 0 | 1334.4234200 | 1334.4232835 |
| 0.0001365  | -0.0003000 | 0.0000000 |    |   |    |    |    |   |              |              |
| 4488:      | 41         | 12        | 30 | 1 | 40 | 12 | 29 | 0 | 1334.6787700 | 1334.6787821 |
| -0.0000121 | -0.0003000 | 0.0000000 |    |   |    |    |    |   |              |              |
| 4489:      | 42         | 12        | 31 | 1 | 41 | 12 | 30 | 0 | 1334.9341700 | 1334.9340857 |
| 0.0000843  | -0.0003000 | 0.0000000 |    |   |    |    |    |   |              |              |
| 4490:      | 43         | 12        | 32 | 1 | 42 | 12 | 31 | 0 | 1335.1891900 | 1335.1891931 |
| -0.0000031 | -0.0003000 | 0.0000000 |    |   |    |    |    |   |              |              |
| 4491:      | 46         | 12        | 35 | 1 | 45 | 12 | 34 | 0 | 1335.9535800 | 1335.9533242 |
| 0.0002558  | -0.0003000 | 0.0000000 |    |   |    |    |    |   |              |              |
| 4492:      | 47         | 12        | 36 | 1 | 46 | 12 | 35 | 0 | 1336.2076100 | 1336.2076330 |
| -0.0000230 | -0.0003000 | 0.0000000 |    |   |    |    |    |   |              |              |
| 4493:      | 48         | 12        | 37 | 1 | 47 | 12 | 36 | 0 | 1336.4619100 | 1336.4617386 |
| 0.0001714  | -0.0003000 | 0.0000000 |    |   |    |    |    |   |              |              |
| 4494:      | 49         | 12        | 38 | 1 | 48 | 12 | 37 | 0 | 1336.7156300 | 1336.7156398 |
| -0.0000098 | -0.0003000 | 0.0000000 |    |   |    |    |    |   |              |              |
| 4495:      | 50         | 12        | 39 | 1 | 49 | 12 | 38 | 0 | 1336.9694100 | 1336.9693350 |
| 0.0000750  | -0.0003000 | 0.0000000 |    |   |    |    |    |   |              |              |
| 4496:      | 51         | 12        | 40 | 1 | 50 | 12 | 39 | 0 | 1337.2228400 | 1337.2228230 |
| 0.0000170  | -0.0003000 | 0.0000000 |    |   |    |    |    |   |              |              |
| 4497:      | 55         | 12        | 44 | 1 | 54 | 12 | 43 | 0 | 1338.2349300 | 1338.2346737 |
| 0.0002563  | -0.0003000 | 0.0000000 |    |   |    |    |    |   |              |              |
| 4498:      | 56         | 12        | 45 | 1 | 55 | 12 | 44 | 0 | 1338.4871200 | 1338.4871040 |
| 0.0000160  | -0.0003000 | 0.0000000 |    |   |    |    |    |   |              |              |
| 4499:      | 57         | 12        | 46 | 1 | 56 | 12 | 45 | 0 | 1338.7393200 | 1338.7393186 |
| 0.0000014  | -0.0003000 | 0.0000000 |    |   |    |    |    |   |              |              |
| 4500:      | 58         | 12        | 47 | 1 | 57 | 12 | 46 | 0 | 1338.9914200 | 1338.9913159 |
| 0.0001041  | -0.0003000 | 0.0000000 |    |   |    |    |    |   |              |              |
| 4501:      | 59         | 12        | 48 | 1 | 58 | 12 | 47 | 0 | 1339.2430400 | 1339.2430946 |
| -0.0000546 | -0.0003000 | 0.0000000 |    |   |    |    |    |   |              |              |
| 4502:      | 60         | 12        | 49 | 1 | 59 | 12 | 48 | 0 | 1339.4944700 | 1339.4946532 |
| -0.0001832 | -0.0003000 | 0.0000000 |    |   |    |    |    |   |              |              |
| 4503:      | 61         | 12        | 50 | 1 | 60 | 12 | 49 | 0 | 1339.7457100 | 1339.7459902 |
| -0.0002802 | -0.0003000 | 0.0000000 |    |   |    |    |    |   |              |              |
| 4504:      | 62         | 12        | 51 | 1 | 61 | 12 | 50 | 0 | 1339.9973700 | 1339.9971042 |
| 0.0002658  | -0.0003000 | 0.0000000 |    |   |    |    |    |   |              |              |
| 4505:      | 63         | 12        | 52 | 1 | 62 | 12 | 51 | 0 | 1340.2481000 | 1340.2479938 |
| 0.0001062  | -0.0003000 | 0.0000000 |    |   |    |    |    |   |              |              |
| 4506:      | 64         | 12        | 53 | 1 | 63 | 12 | 52 | 0 | 1340.4988200 | 1340.4986573 |
| 0.0001627  | -0.0003000 | 0.0000000 |    |   |    |    |    |   |              |              |
| 4507:      | 65         | 12        | 54 | 1 | 64 | 12 | 53 | 0 | 1340.7491800 | 1340.7490935 |
| 0.0000865  | -0.0003000 | 0.0000000 |    |   |    |    |    |   |              |              |
| 4508:      | 66         | 12        | 55 | 1 | 65 | 12 | 54 | 0 | 1340.9995200 | 1340.9993007 |
| 0.0002193  | -0.0003000 | 0.0000000 |    |   |    |    |    |   |              |              |
| 4509:      | 67         | 12        | 56 | 1 | 66 | 12 | 55 | 0 | 1341.2493500 | 1341.2492775 |
| 0.0000725  | -0.0003000 | 0.0000000 |    |   |    |    |    |   |              |              |
| 4510:      | 70         | 12        | 59 | 1 | 69 | 12 | 58 | 0 | 1341.9978800 | 1341.9978105 |
| 0.0000695  | -0.0003000 | 0.0000000 |    |   |    |    |    |   |              |              |
| 4511:      | 71         | 12        | 60 | 1 | 70 | 12 | 59 | 0 | 1342.2469300 | 1342.2468507 |
| 0.0000793  | -0.0003000 | 0.0000000 |    |   |    |    |    |   |              |              |
| 4512:      | 72         | 12        | 61 | 1 | 71 | 12 | 60 | 0 | 1342.4959200 | 1342.4956529 |
| 0.0002671  | -0.0003000 | 0.0000000 |    |   |    |    |    |   |              |              |
| 4513:      | 83         | 12        | 72 | 1 | 82 | 12 | 71 | 0 | 1345.2167300 | 1345.2163282 |
| 0.0004018  | -0.0003000 | 0.0000000 |    |   |    |    |    |   |              |              |
| 4514:      | 84         | 12        | 73 | 1 | 83 | 12 | 72 | 0 | 1345.4622300 | 1345.4621534 |
| 0.0000766  | -0.0003000 | 0.0000000 |    |   |    |    |    |   |              |              |
| 4515:      | 85         | 12        | 74 | 1 | 84 | 12 | 73 | 0 | 1345.7078600 | 1345.7077201 |

|            |            |           |              |              |
|------------|------------|-----------|--------------|--------------|
| 0.0001399  | -0.0003000 | 0.0000000 |              |              |
| 4516: 70   | 13 57 1 71 | 13 58 0   | 1304.9211300 | 1304.9203939 |
| 0.0007361  | -0.0003000 | 0.0000000 |              |              |
| 4517: 69   | 13 56 1 70 | 13 57 0   | 1305.1888600 | 1305.1884213 |
| 0.0004387  | -0.0003000 | 0.0000000 |              |              |
| 4518: 68   | 13 55 1 69 | 13 56 0   | 1305.4566100 | 1305.4564283 |
| 0.0001817  | -0.0003000 | 0.0000000 |              |              |
| 4519: 67   | 13 54 1 68 | 13 55 0   | 1305.7245000 | 1305.7244132 |
| 0.0000868  | -0.0003000 | 0.0000000 |              |              |
| 4520: 65   | 13 52 1 66 | 13 53 0   | 1306.2603500 | 1306.2603093 |
| 0.0000407  | -0.0003000 | 0.0000000 |              |              |
| 4521: 64   | 13 51 1 65 | 13 52 0   | 1306.5281200 | 1306.5282167 |
| -0.0000967 | -0.0003000 | 0.0000000 |              |              |
| 4522: 63   | 13 50 1 64 | 13 51 0   | 1306.7959100 | 1306.7960947 |
| -0.0001847 | -0.0003000 | 0.0000000 |              |              |
| 4523: 62   | 13 49 1 63 | 13 50 0   | 1307.0638200 | 1307.0639414 |
| -0.0001214 | -0.0003000 | 0.0000000 |              |              |
| 4524: 61   | 13 48 1 62 | 13 49 0   | 1307.3316600 | 1307.3317550 |
| -0.0000950 | -0.0003000 | 0.0000000 |              |              |
| 4525: 60   | 13 47 1 61 | 13 48 0   | 1307.5996300 | 1307.5995336 |
| 0.0000964  | -0.0003000 | 0.0000000 |              |              |
| 4526: 59   | 13 46 1 60 | 13 47 0   | 1307.8672800 | 1307.8672755 |
| 0.0000045  | -0.0003000 | 0.0000000 |              |              |
| 4527: 58   | 13 45 1 59 | 13 46 0   | 1308.1347400 | 1308.1349787 |
| -0.0002387 | -0.0003000 | 0.0000000 |              |              |
| 4528: 57   | 13 44 1 58 | 13 45 0   | 1308.4026500 | 1308.4026416 |
| 0.0000084  | -0.0003000 | 0.0000000 |              |              |
| 4529: 56   | 13 43 1 57 | 13 44 0   | 1308.6700400 | 1308.6702623 |
| -0.0002223 | -0.0003000 | 0.0000000 |              |              |
| 4530: 55   | 13 42 1 56 | 13 43 0   | 1308.9378400 | 1308.9378390 |
| 0.0000010  | -0.0003000 | 0.0000000 |              |              |
| 4531: 54   | 13 41 1 55 | 13 42 0   | 1309.2050800 | 1309.2053699 |
| -0.0002899 | -0.0003000 | 0.0000000 |              |              |
| 4532: 53   | 13 40 1 54 | 13 41 0   | 1309.4727300 | 1309.4728532 |
| -0.0001232 | -0.0003000 | 0.0000000 |              |              |
| 4533: 52   | 13 39 1 53 | 13 40 0   | 1309.7403100 | 1309.7402871 |
| 0.0000229  | -0.0003000 | 0.0000000 |              |              |
| 4534: 51   | 13 38 1 52 | 13 39 0   | 1310.0077800 | 1310.0076698 |
| 0.0001102  | -0.0003000 | 0.0000000 |              |              |
| 4535: 50   | 13 37 1 51 | 13 38 0   | 1310.2750000 | 1310.2749996 |
| 0.0000004  | -0.0003000 | 0.0000000 |              |              |
| 4536: 49   | 13 36 1 50 | 13 37 0   | 1310.5422000 | 1310.5422747 |
| -0.0000747 | -0.0003000 | 0.0000000 |              |              |
| 4537: 48   | 13 35 1 49 | 13 36 0   | 1310.8094000 | 1310.8094932 |
| -0.0000932 | -0.0003000 | 0.0000000 |              |              |
| 4538: 47   | 13 34 1 48 | 13 35 0   | 1311.0766100 | 1311.0766535 |
| -0.0000435 | -0.0003000 | 0.0000000 |              |              |
| 4539: 46   | 13 33 1 47 | 13 34 0   | 1311.3437000 | 1311.3437537 |
| -0.0000537 | -0.0003000 | 0.0000000 |              |              |
| 4540: 45   | 13 32 1 46 | 13 33 0   | 1311.6107000 | 1311.6107921 |
| -0.0000921 | -0.0003000 | 0.0000000 |              |              |
| 4541: 44   | 13 31 1 45 | 13 32 0   | 1311.8777100 | 1311.8777670 |
| -0.0000570 | -0.0003000 | 0.0000000 |              |              |
| 4542: 43   | 13 30 1 44 | 13 31 0   | 1312.1447900 | 1312.1446766 |
| 0.0001134  | -0.0003000 | 0.0000000 |              |              |
| 4543: 42   | 13 29 1 43 | 13 30 0   | 1312.4115000 | 1312.4115191 |
| -0.0000191 | -0.0003000 | 0.0000000 |              |              |
| 4544: 41   | 13 28 1 42 | 13 29 0   | 1312.6783000 | 1312.6782928 |
| 0.0000072  | -0.0003000 | 0.0000000 |              |              |
| 4545: 40   | 13 27 1 41 | 13 28 0   | 1312.9448900 | 1312.9449960 |
| -0.0001060 | -0.0003000 | 0.0000000 |              |              |
| 4546: 39   | 13 26 1 40 | 13 27 0   | 1313.2116900 | 1313.2116269 |
| 0.0000631  | -0.0003000 | 0.0000000 |              |              |
| 4547: 38   | 13 25 1 39 | 13 26 0   | 1313.4783300 | 1313.4781839 |
| 0.0001461  | -0.0003000 | 0.0000000 |              |              |

|            |            |           |    |   |    |    |    |   |              |              |
|------------|------------|-----------|----|---|----|----|----|---|--------------|--------------|
| 4548:      | 37         | 13        | 24 | 1 | 38 | 13 | 25 | 0 | 1313.7447100 | 1313.7446652 |
| 0.0000448  | -0.0003000 | 0.0000000 |    |   |    |    |    |   |              |              |
| 4549:      | 36         | 13        | 23 | 1 | 37 | 13 | 24 | 0 | 1314.0113700 | 1314.0110690 |
| 0.0003010  | -0.0003000 | 0.0000000 |    |   |    |    |    |   |              |              |
| 4550:      | 35         | 13        | 22 | 1 | 36 | 13 | 23 | 0 | 1314.2774500 | 1314.2773937 |
| 0.0000563  | -0.0003000 | 0.0000000 |    |   |    |    |    |   |              |              |
| 4551:      | 34         | 13        | 21 | 1 | 35 | 13 | 22 | 0 | 1314.5435700 | 1314.5436377 |
| -0.0000677 | -0.0003000 | 0.0000000 |    |   |    |    |    |   |              |              |
| 4552:      | 33         | 13        | 20 | 1 | 34 | 13 | 21 | 0 | 1314.8096600 | 1314.8097990 |
| -0.0001390 | -0.0003000 | 0.0000000 |    |   |    |    |    |   |              |              |
| 4553:      | 32         | 13        | 19 | 1 | 33 | 13 | 20 | 0 | 1315.0758600 | 1315.0758762 |
| -0.0000162 | -0.0003000 | 0.0000000 |    |   |    |    |    |   |              |              |
| 4554:      | 31         | 13        | 18 | 1 | 32 | 13 | 19 | 0 | 1315.3416300 | 1315.3418675 |
| -0.0002375 | -0.0003000 | 0.0000000 |    |   |    |    |    |   |              |              |
| 4555:      | 30         | 13        | 17 | 1 | 31 | 13 | 18 | 0 | 1315.6078600 | 1315.6077712 |
| 0.0000888  | -0.0003000 | 0.0000000 |    |   |    |    |    |   |              |              |
| 4556:      | 29         | 13        | 16 | 1 | 30 | 13 | 17 | 0 | 1315.8736800 | 1315.8735856 |
| 0.0000944  | -0.0003000 | 0.0000000 |    |   |    |    |    |   |              |              |
| 4557:      | 28         | 13        | 15 | 1 | 29 | 13 | 16 | 0 | 1316.1391600 | 1316.1393091 |
| -0.0001491 | -0.0003000 | 0.0000000 |    |   |    |    |    |   |              |              |
| 4558:      | 27         | 13        | 14 | 1 | 28 | 13 | 15 | 0 | 1316.4051700 | 1316.4049400 |
| 0.0002300  | -0.0003000 | 0.0000000 |    |   |    |    |    |   |              |              |
| 4559:      | 26         | 13        | 13 | 1 | 27 | 13 | 14 | 0 | 1316.6710300 | 1316.6704767 |
| 0.0005533  | -0.0003000 | 0.0000000 |    |   |    |    |    |   |              |              |
| 4560:      | 25         | 13        | 12 | 1 | 26 | 13 | 13 | 0 | 1316.9362700 | 1316.9359174 |
| 0.0003526  | -0.0003000 | 0.0000000 |    |   |    |    |    |   |              |              |
| 4561:      | 24         | 13        | 11 | 1 | 25 | 13 | 12 | 0 | 1317.2013300 | 1317.2012606 |
| 0.0000694  | -0.0003000 | 0.0000000 |    |   |    |    |    |   |              |              |
| 4562:      | 23         | 13        | 10 | 1 | 24 | 13 | 11 | 0 | 1317.4664800 | 1317.4665046 |
| -0.0000246 | -0.0003000 | 0.0000000 |    |   |    |    |    |   |              |              |
| 4563:      | 22         | 13        | 9  | 1 | 23 | 13 | 10 | 0 | 1317.7319100 | 1317.7316478 |
| 0.0002622  | -0.0003000 | 0.0000000 |    |   |    |    |    |   |              |              |
| 4564:      | 21         | 13        | 8  | 1 | 22 | 13 | 9  | 0 | 1317.9972000 | 1317.9966885 |
| 0.0005115  | -0.0003000 | 0.0000000 |    |   |    |    |    |   |              |              |
| 4565:      | 20         | 13        | 7  | 1 | 21 | 13 | 8  | 0 | 1318.2619100 | 1318.2616252 |
| 0.0002848  | -0.0003000 | 0.0000000 |    |   |    |    |    |   |              |              |
| 4566:      | 18         | 13        | 5  | 1 | 19 | 13 | 6  | 0 | 1318.7915100 | 1318.7911797 |
| 0.0003303  | -0.0003000 | 0.0000000 |    |   |    |    |    |   |              |              |
| 4567:      | 14         | 13        | 1  | 1 | 13 | 13 | 0  | 0 | 1327.4565200 | 1327.4565781 |
| -0.0000581 | -0.0003000 | 0.0000000 |    |   |    |    |    |   |              |              |
| 4568:      | 15         | 13        | 2  | 1 | 14 | 13 | 1  | 0 | 1327.7167700 | 1327.7167265 |
| 0.0000435  | -0.0003000 | 0.0000000 |    |   |    |    |    |   |              |              |
| 4569:      | 16         | 13        | 3  | 1 | 15 | 13 | 2  | 0 | 1327.9766500 | 1327.9767138 |
| -0.0000638 | -0.0003000 | 0.0000000 |    |   |    |    |    |   |              |              |
| 4570:      | 18         | 13        | 5  | 1 | 17 | 13 | 4  | 0 | 1328.4959300 | 1328.4961996 |
| -0.0002696 | -0.0003000 | 0.0000000 |    |   |    |    |    |   |              |              |
| 4571:      | 19         | 13        | 6  | 1 | 18 | 13 | 5  | 0 | 1328.7557300 | 1328.7556950 |
| 0.0000350  | -0.0003000 | 0.0000000 |    |   |    |    |    |   |              |              |
| 4572:      | 20         | 13        | 7  | 1 | 19 | 13 | 6  | 0 | 1329.0149700 | 1329.0150235 |
| -0.0000535 | -0.0003000 | 0.0000000 |    |   |    |    |    |   |              |              |
| 4573:      | 21         | 13        | 8  | 1 | 20 | 13 | 7  | 0 | 1329.2741200 | 1329.2741836 |
| -0.0000636 | -0.0003000 | 0.0000000 |    |   |    |    |    |   |              |              |
| 4574:      | 22         | 13        | 9  | 1 | 21 | 13 | 8  | 0 | 1329.5333000 | 1329.5331738 |
| 0.0001262  | -0.0003000 | 0.0000000 |    |   |    |    |    |   |              |              |
| 4575:      | 23         | 13        | 10 | 1 | 22 | 13 | 9  | 0 | 1329.7919400 | 1329.7919926 |
| -0.0000526 | -0.0003000 | 0.0000000 |    |   |    |    |    |   |              |              |
| 4576:      | 24         | 13        | 11 | 1 | 23 | 13 | 10 | 0 | 1330.0506700 | 1330.0506386 |
| 0.0000314  | -0.0003000 | 0.0000000 |    |   |    |    |    |   |              |              |
| 4577:      | 25         | 13        | 12 | 1 | 24 | 13 | 11 | 0 | 1330.3090900 | 1330.3091103 |
| -0.0000203 | -0.0003000 | 0.0000000 |    |   |    |    |    |   |              |              |
| 4578:      | 27         | 13        | 14 | 1 | 26 | 13 | 13 | 0 | 1330.8257000 | 1330.8255248 |
| 0.0001752  | -0.0003000 | 0.0000000 |    |   |    |    |    |   |              |              |
| 4579:      | 28         | 13        | 15 | 1 | 27 | 13 | 14 | 0 | 1331.0835400 | 1331.0834646 |
| 0.0000754  | -0.0003000 | 0.0000000 |    |   |    |    |    |   |              |              |
| 4580:      | 29         | 13        | 16 | 1 | 28 | 13 | 15 | 0 | 1331.3414600 | 1331.3412242 |

|            |                    |           |              |              |
|------------|--------------------|-----------|--------------|--------------|
| 0.0002358  | -0.0003000         | 0.0000000 |              |              |
| 4581: 30   | 13 17 1 29 13 16 0 |           | 1331.5990900 | 1331.5988020 |
| 0.0002880  | -0.0003000         | 0.0000000 |              |              |
| 4582: 31   | 13 18 1 30 13 17 0 |           | 1331.8562900 | 1331.8561967 |
| 0.0000933  | -0.0003000         | 0.0000000 |              |              |
| 4583: 32   | 13 19 1 31 13 18 0 |           | 1332.1134000 | 1332.1134066 |
| -0.0000066 | -0.0003000         | 0.0000000 |              |              |
| 4584: 33   | 13 20 1 32 13 19 0 |           | 1332.3707400 | 1332.3704303 |
| 0.0003097  | -0.0003000         | 0.0000000 |              |              |
| 4585: 34   | 13 21 1 33 13 20 0 |           | 1332.6274300 | 1332.6272664 |
| 0.0001636  | -0.0003000         | 0.0000000 |              |              |
| 4586: 35   | 13 22 1 34 13 21 0 |           | 1332.8843500 | 1332.8839133 |
| 0.0004367  | -0.0003000         | 0.0000000 |              |              |
| 4587: 37   | 13 24 1 36 13 23 0 |           | 1333.3971200 | 1333.3966335 |
| 0.0004865  | -0.0003000         | 0.0000000 |              |              |
| 4588: 38   | 13 25 1 37 13 24 0 |           | 1333.6528600 | 1333.6527039 |
| 0.0001561  | -0.0003000         | 0.0000000 |              |              |
| 4589: 40   | 13 27 1 39 13 26 0 |           | 1334.1644200 | 1334.1642575 |
| 0.0001625  | -0.0003000         | 0.0000000 |              |              |
| 4590: 41   | 13 28 1 40 13 27 0 |           | 1334.4196700 | 1334.4197378 |
| -0.0000678 | -0.0003000         | 0.0000000 |              |              |
| 4591: 42   | 13 29 1 41 13 28 0 |           | 1334.6751000 | 1334.6750183 |
| 0.0000817  | -0.0003000         | 0.0000000 |              |              |
| 4592: 43   | 13 30 1 42 13 29 0 |           | 1334.9301600 | 1334.9300976 |
| 0.0000624  | -0.0003000         | 0.0000000 |              |              |
| 4593: 45   | 13 32 1 44 13 31 0 |           | 1335.4397900 | 1335.4396463 |
| 0.0001437  | -0.0003000         | 0.0000000 |              |              |
| 4594: 46   | 13 33 1 45 13 32 0 |           | 1335.6945300 | 1335.6941127 |
| 0.0004173  | -0.0003000         | 0.0000000 |              |              |
| 4595: 47   | 13 34 1 46 13 33 0 |           | 1335.9481600 | 1335.9483717 |
| -0.0002117 | -0.0003000         | 0.0000000 |              |              |
| 4596: 48   | 13 35 1 47 13 34 0 |           | 1336.2025500 | 1336.2024217 |
| 0.0001283  | -0.0003000         | 0.0000000 |              |              |
| 4597: 49   | 13 36 1 48 13 35 0 |           | 1336.4561300 | 1336.4562613 |
| -0.0001313 | -0.0003000         | 0.0000000 |              |              |
| 4598: 50   | 13 37 1 49 13 36 0 |           | 1336.7101100 | 1336.7098889 |
| 0.0002211  | -0.0003000         | 0.0000000 |              |              |
| 4599: 51   | 13 38 1 50 13 37 0 |           | 1336.9632200 | 1336.9633028 |
| -0.0000828 | -0.0003000         | 0.0000000 |              |              |
| 4600: 52   | 13 39 1 51 13 38 0 |           | 1337.2167600 | 1337.2165016 |
| 0.0002584  | -0.0003000         | 0.0000000 |              |              |
| 4601: 53   | 13 40 1 52 13 39 0 |           | 1337.4691200 | 1337.4694837 |
| -0.0003637 | -0.0003000         | 0.0000000 |              |              |
| 4602: 54   | 13 41 1 53 13 40 0 |           | 1337.7221700 | 1337.7222474 |
| -0.0000774 | -0.0003000         | 0.0000000 |              |              |
| 4603: 55   | 13 42 1 54 13 41 0 |           | 1337.9745600 | 1337.9747913 |
| -0.0002313 | -0.0003000         | 0.0000000 |              |              |
| 4604: 56   | 13 43 1 55 13 42 0 |           | 1338.2272300 | 1338.2271136 |
| 0.0001164  | -0.0003000         | 0.0000000 |              |              |
| 4605: 57   | 13 44 1 56 13 43 0 |           | 1338.4794100 | 1338.4792128 |
| 0.0001972  | -0.0003000         | 0.0000000 |              |              |
| 4606: 58   | 13 45 1 57 13 44 0 |           | 1338.7313200 | 1338.7310874 |
| 0.0002326  | -0.0003000         | 0.0000000 |              |              |
| 4607: 59   | 13 46 1 58 13 45 0 |           | 1338.9823900 | 1338.9827356 |
| -0.0003456 | -0.0003000         | 0.0000000 |              |              |
| 4608: 60   | 13 47 1 59 13 46 0 |           | 1339.2339300 | 1339.2341558 |
| -0.0002258 | -0.0003000         | 0.0000000 |              |              |
| 4609: 61   | 13 48 1 60 13 47 0 |           | 1339.4850100 | 1339.4853465 |
| -0.0003365 | -0.0003000         | 0.0000000 |              |              |
| 4610: 62   | 13 49 1 61 13 48 0 |           | 1339.7359100 | 1339.7363060 |
| -0.0003960 | -0.0003000         | 0.0000000 |              |              |
| 4611: 64   | 13 51 1 63 13 50 0 |           | 1340.2375800 | 1340.2375247 |
| 0.0000553  | -0.0003000         | 0.0000000 |              |              |
| 4612: 65   | 13 52 1 64 13 51 0 |           | 1340.4881000 | 1340.4877807 |
| 0.0003193  | -0.0003000         | 0.0000000 |              |              |

|                                 |              |              |
|---------------------------------|--------------|--------------|
| 4613: 66 13 53 1 65 13 52 0     | 1340.7375100 | 1340.7377988 |
| -0.0002888 -0.0003000 0.0000000 |              |              |
| 4614: 67 13 54 1 66 13 53 0     | 1340.9872200 | 1340.9875773 |
| -0.0003573 -0.0003000 0.0000000 |              |              |
| 4615: 68 13 55 1 67 13 54 0     | 1341.2372000 | 1341.2371147 |
| 0.0000853 -0.0003000 0.0000000  |              |              |
| 4616: 69 13 56 1 68 13 55 0     | 1341.4860800 | 1341.4864092 |
| -0.0003292 -0.0003000 0.0000000 |              |              |
| 4617: 70 13 57 1 69 13 56 0     | 1341.7356300 | 1341.7354591 |
| 0.0001709 -0.0003000 0.0000000  |              |              |
| 4618: 71 13 58 1 70 13 57 0     | 1341.9843600 | 1341.9842626 |
| 0.0000974 -0.0003000 0.0000000  |              |              |
| 4619: 72 13 59 1 71 13 58 0     | 1342.2331100 | 1342.2328181 |
| 0.0002919 -0.0003000 0.0000000  |              |              |
| 4620: 73 13 60 1 72 13 59 0     | 1342.4813300 | 1342.4811238 |
| 0.0002062 -0.0003000 0.0000000  |              |              |
| 4621: 74 13 61 1 73 13 60 0     | 1342.7290400 | 1342.7291781 |
| -0.0001381 -0.0003000 0.0000000 |              |              |
| 4622: 75 13 62 1 74 13 61 0     | 1342.9774200 | 1342.9769790 |
| 0.0004410 -0.0003000 0.0000000  |              |              |
| 4623: 76 13 63 1 75 13 62 0     | 1343.2246100 | 1343.2245250 |
| 0.0000850 -0.0003000 0.0000000  |              |              |
| 4624: 77 13 64 1 76 13 63 0     | 1343.4717500 | 1343.4718141 |
| -0.0000641 -0.0003000 0.0000000 |              |              |
| 4625: 78 13 65 1 77 13 64 0     | 1343.7190000 | 1343.7188447 |
| 0.0001553 -0.0003000 0.0000000  |              |              |
| 4626: 79 13 66 1 78 13 65 0     | 1343.9658300 | 1343.9656149 |
| 0.0002151 -0.0003000 0.0000000  |              |              |
| 4627: 80 13 67 1 79 13 66 0     | 1344.2123500 | 1344.2121230 |
| 0.0002270 -0.0003000 0.0000000  |              |              |
| 4628: 81 13 68 1 80 13 67 0     | 1344.4589900 | 1344.4583670 |
| 0.0006230 -0.0003000 0.0000000  |              |              |
| 4629: 82 13 69 1 81 13 68 0     | 1344.7046200 | 1344.7043453 |
| 0.0002747 -0.0003000 0.0000000  |              |              |
| 4630: 70 13 58 1 71 13 59 0     | 1304.9211300 | 1304.9203939 |
| 0.0007361 -0.0003000 0.0000000  |              |              |
| 4631: 69 13 57 1 70 13 58 0     | 1305.1888600 | 1305.1884213 |
| 0.0004387 -0.0003000 0.0000000  |              |              |
| 4632: 68 13 56 1 69 13 57 0     | 1305.4566100 | 1305.4564283 |
| 0.0001817 -0.0003000 0.0000000  |              |              |
| 4633: 67 13 55 1 68 13 56 0     | 1305.7245000 | 1305.7244132 |
| 0.0000868 -0.0003000 0.0000000  |              |              |
| 4634: 65 13 53 1 66 13 54 0     | 1306.2603500 | 1306.2603093 |
| 0.0000407 -0.0003000 0.0000000  |              |              |
| 4635: 64 13 52 1 65 13 53 0     | 1306.5281200 | 1306.5282167 |
| -0.0000967 -0.0003000 0.0000000 |              |              |
| 4636: 63 13 51 1 64 13 52 0     | 1306.7959100 | 1306.7960947 |
| -0.0001847 -0.0003000 0.0000000 |              |              |
| 4637: 62 13 50 1 63 13 51 0     | 1307.0638200 | 1307.0639414 |
| -0.0001214 -0.0003000 0.0000000 |              |              |
| 4638: 61 13 49 1 62 13 50 0     | 1307.3316600 | 1307.3317550 |
| -0.0000950 -0.0003000 0.0000000 |              |              |
| 4639: 60 13 48 1 61 13 49 0     | 1307.5996300 | 1307.5995336 |
| 0.0000964 -0.0003000 0.0000000  |              |              |
| 4640: 59 13 47 1 60 13 48 0     | 1307.8672800 | 1307.8672755 |
| 0.0000045 -0.0003000 0.0000000  |              |              |
| 4641: 58 13 46 1 59 13 47 0     | 1308.1347400 | 1308.1349787 |
| -0.0002387 -0.0003000 0.0000000 |              |              |
| 4642: 57 13 45 1 58 13 46 0     | 1308.4026500 | 1308.4026416 |
| 0.0000084 -0.0003000 0.0000000  |              |              |
| 4643: 56 13 44 1 57 13 45 0     | 1308.6700400 | 1308.6702623 |
| -0.0002223 -0.0003000 0.0000000 |              |              |
| 4644: 55 13 43 1 56 13 44 0     | 1308.9378400 | 1308.9378390 |
| 0.0000010 -0.0003000 0.0000000  |              |              |
| 4645: 54 13 42 1 55 13 43 0     | 1309.2050800 | 1309.2053699 |

|              |            |           |    |              |
|--------------|------------|-----------|----|--------------|
| -0.0002899   | -0.0003000 | 0.0000000 |    |              |
| 4646:        | 53         | 13        | 41 | 1 54 13 42 0 |
| 1309.4727300 |            |           |    | 1309.4728532 |
| -0.0001232   | -0.0003000 | 0.0000000 |    |              |
| 4647:        | 52         | 13        | 40 | 1 53 13 41 0 |
| 1309.7403100 |            |           |    | 1309.7402871 |
| 0.0000229    | -0.0003000 | 0.0000000 |    |              |
| 4648:        | 51         | 13        | 39 | 1 52 13 40 0 |
| 1310.0077800 |            |           |    | 1310.0076698 |
| 0.0001102    | -0.0003000 | 0.0000000 |    |              |
| 4649:        | 50         | 13        | 38 | 1 51 13 39 0 |
| 1310.2750000 |            |           |    | 1310.2749996 |
| 0.0000004    | -0.0003000 | 0.0000000 |    |              |
| 4650:        | 49         | 13        | 37 | 1 50 13 38 0 |
| 1310.5422000 |            |           |    | 1310.5422747 |
| -0.0000747   | -0.0003000 | 0.0000000 |    |              |
| 4651:        | 48         | 13        | 36 | 1 49 13 37 0 |
| 1310.8094000 |            |           |    | 1310.8094932 |
| -0.0000932   | -0.0003000 | 0.0000000 |    |              |
| 4652:        | 47         | 13        | 35 | 1 48 13 36 0 |
| 1311.0766100 |            |           |    | 1311.0766535 |
| -0.0000435   | -0.0003000 | 0.0000000 |    |              |
| 4653:        | 46         | 13        | 34 | 1 47 13 35 0 |
| 1311.3437000 |            |           |    | 1311.3437537 |
| -0.0000537   | -0.0003000 | 0.0000000 |    |              |
| 4654:        | 45         | 13        | 33 | 1 46 13 34 0 |
| 1311.6107000 |            |           |    | 1311.6107921 |
| -0.0000921   | -0.0003000 | 0.0000000 |    |              |
| 4655:        | 44         | 13        | 32 | 1 45 13 33 0 |
| 1311.8777100 |            |           |    | 1311.8777670 |
| -0.0000570   | -0.0003000 | 0.0000000 |    |              |
| 4656:        | 43         | 13        | 31 | 1 44 13 32 0 |
| 1312.1447900 |            |           |    | 1312.1446766 |
| 0.0001134    | -0.0003000 | 0.0000000 |    |              |
| 4657:        | 42         | 13        | 30 | 1 43 13 31 0 |
| 1312.4115000 |            |           |    | 1312.4115191 |
| -0.0000191   | -0.0003000 | 0.0000000 |    |              |
| 4658:        | 41         | 13        | 29 | 1 42 13 30 0 |
| 1312.6783000 |            |           |    | 1312.6782928 |
| 0.0000072    | -0.0003000 | 0.0000000 |    |              |
| 4659:        | 40         | 13        | 28 | 1 41 13 29 0 |
| 1312.9448900 |            |           |    | 1312.9449960 |
| -0.0001060   | -0.0003000 | 0.0000000 |    |              |
| 4660:        | 39         | 13        | 27 | 1 40 13 28 0 |
| 1313.2116900 |            |           |    | 1313.2116269 |
| 0.0000631    | -0.0003000 | 0.0000000 |    |              |
| 4661:        | 38         | 13        | 26 | 1 39 13 27 0 |
| 1313.4783300 |            |           |    | 1313.4781839 |
| 0.0001461    | -0.0003000 | 0.0000000 |    |              |
| 4662:        | 37         | 13        | 25 | 1 38 13 26 0 |
| 1313.7447100 |            |           |    | 1313.7446652 |
| 0.0000448    | -0.0003000 | 0.0000000 |    |              |
| 4663:        | 36         | 13        | 24 | 1 37 13 25 0 |
| 1314.0113700 |            |           |    | 1314.0110690 |
| 0.0003010    | -0.0003000 | 0.0000000 |    |              |
| 4664:        | 35         | 13        | 23 | 1 36 13 24 0 |
| 1314.2774500 |            |           |    | 1314.2773937 |
| 0.0000563    | -0.0003000 | 0.0000000 |    |              |
| 4665:        | 34         | 13        | 22 | 1 35 13 23 0 |
| 1314.5435700 |            |           |    | 1314.5436377 |
| -0.0000677   | -0.0003000 | 0.0000000 |    |              |
| 4666:        | 33         | 13        | 21 | 1 34 13 22 0 |
| 1314.8096600 |            |           |    | 1314.8097990 |
| -0.0001390   | -0.0003000 | 0.0000000 |    |              |
| 4667:        | 32         | 13        | 20 | 1 33 13 21 0 |
| 1315.0758600 |            |           |    | 1315.0758762 |
| -0.0000162   | -0.0003000 | 0.0000000 |    |              |
| 4668:        | 31         | 13        | 19 | 1 32 13 20 0 |
| 1315.3416300 |            |           |    | 1315.3418675 |
| -0.0002375   | -0.0003000 | 0.0000000 |    |              |
| 4669:        | 30         | 13        | 18 | 1 31 13 19 0 |
| 1315.6078600 |            |           |    | 1315.6077712 |
| 0.0000888    | -0.0003000 | 0.0000000 |    |              |
| 4670:        | 29         | 13        | 17 | 1 30 13 18 0 |
| 1315.8736800 |            |           |    | 1315.8735856 |
| 0.0000944    | -0.0003000 | 0.0000000 |    |              |
| 4671:        | 28         | 13        | 16 | 1 29 13 17 0 |
| 1316.1391600 |            |           |    | 1316.1393091 |
| -0.0001491   | -0.0003000 | 0.0000000 |    |              |
| 4672:        | 27         | 13        | 15 | 1 28 13 16 0 |
| 1316.4051700 |            |           |    | 1316.4049400 |
| 0.0002300    | -0.0003000 | 0.0000000 |    |              |
| 4673:        | 26         | 13        | 14 | 1 27 13 15 0 |
| 1316.6710300 |            |           |    | 1316.6704767 |
| 0.0005533    | -0.0003000 | 0.0000000 |    |              |
| 4674:        | 25         | 13        | 13 | 1 26 13 14 0 |
| 1316.9362700 |            |           |    | 1316.9359174 |
| 0.0003526    | -0.0003000 | 0.0000000 |    |              |
| 4675:        | 24         | 13        | 12 | 1 25 13 13 0 |
| 1317.2013300 |            |           |    | 1317.2012606 |
| 0.0000694    | -0.0003000 | 0.0000000 |    |              |
| 4676:        | 23         | 13        | 11 | 1 24 13 12 0 |
| 1317.4664800 |            |           |    | 1317.4665046 |
| -0.0000246   | -0.0003000 | 0.0000000 |    |              |
| 4677:        | 22         | 13        | 10 | 1 23 13 11 0 |
| 1317.7319100 |            |           |    | 1317.7316478 |
| 0.0002622    | -0.0003000 | 0.0000000 |    |              |

|       |            |            |           |   |    |    |    |   |              |              |
|-------|------------|------------|-----------|---|----|----|----|---|--------------|--------------|
| 4678: | 21         | 13         | 9         | 1 | 22 | 13 | 10 | 0 | 1317.9972000 | 1317.9966885 |
|       | 0.0005115  | -0.0003000 | 0.0000000 |   |    |    |    |   |              |              |
| 4679: | 20         | 13         | 8         | 1 | 21 | 13 | 9  | 0 | 1318.2619100 | 1318.2616252 |
|       | 0.0002848  | -0.0003000 | 0.0000000 |   |    |    |    |   |              |              |
| 4680: | 18         | 13         | 6         | 1 | 19 | 13 | 7  | 0 | 1318.7915100 | 1318.7911797 |
|       | 0.0003303  | -0.0003000 | 0.0000000 |   |    |    |    |   |              |              |
| 4681: | 14         | 13         | 2         | 1 | 13 | 13 | 1  | 0 | 1327.4565200 | 1327.4565781 |
|       | -0.0000581 | -0.0003000 | 0.0000000 |   |    |    |    |   |              |              |
| 4682: | 15         | 13         | 3         | 1 | 14 | 13 | 2  | 0 | 1327.7167700 | 1327.7167265 |
|       | 0.0000435  | -0.0003000 | 0.0000000 |   |    |    |    |   |              |              |
| 4683: | 16         | 13         | 4         | 1 | 15 | 13 | 3  | 0 | 1327.9766500 | 1327.9767138 |
|       | -0.0000638 | -0.0003000 | 0.0000000 |   |    |    |    |   |              |              |
| 4684: | 18         | 13         | 6         | 1 | 17 | 13 | 5  | 0 | 1328.4959300 | 1328.4961996 |
|       | -0.0002696 | -0.0003000 | 0.0000000 |   |    |    |    |   |              |              |
| 4685: | 19         | 13         | 7         | 1 | 18 | 13 | 6  | 0 | 1328.7557300 | 1328.7556950 |
|       | 0.0000350  | -0.0003000 | 0.0000000 |   |    |    |    |   |              |              |
| 4686: | 20         | 13         | 8         | 1 | 19 | 13 | 7  | 0 | 1329.0149700 | 1329.0150235 |
|       | -0.0000535 | -0.0003000 | 0.0000000 |   |    |    |    |   |              |              |
| 4687: | 21         | 13         | 9         | 1 | 20 | 13 | 8  | 0 | 1329.2741200 | 1329.2741836 |
|       | -0.0000636 | -0.0003000 | 0.0000000 |   |    |    |    |   |              |              |
| 4688: | 22         | 13         | 10        | 1 | 21 | 13 | 9  | 0 | 1329.5333000 | 1329.5331738 |
|       | 0.0001262  | -0.0003000 | 0.0000000 |   |    |    |    |   |              |              |
| 4689: | 23         | 13         | 11        | 1 | 22 | 13 | 10 | 0 | 1329.7919400 | 1329.7919926 |
|       | -0.0000526 | -0.0003000 | 0.0000000 |   |    |    |    |   |              |              |
| 4690: | 24         | 13         | 12        | 1 | 23 | 13 | 11 | 0 | 1330.0506700 | 1330.0506386 |
|       | 0.0000314  | -0.0003000 | 0.0000000 |   |    |    |    |   |              |              |
| 4691: | 25         | 13         | 13        | 1 | 24 | 13 | 12 | 0 | 1330.3090900 | 1330.3091103 |
|       | -0.0000203 | -0.0003000 | 0.0000000 |   |    |    |    |   |              |              |
| 4692: | 27         | 13         | 15        | 1 | 26 | 13 | 14 | 0 | 1330.8257000 | 1330.8255248 |
|       | 0.0001752  | -0.0003000 | 0.0000000 |   |    |    |    |   |              |              |
| 4693: | 28         | 13         | 16        | 1 | 27 | 13 | 15 | 0 | 1331.0835400 | 1331.0834646 |
|       | 0.0000754  | -0.0003000 | 0.0000000 |   |    |    |    |   |              |              |
| 4694: | 29         | 13         | 17        | 1 | 28 | 13 | 16 | 0 | 1331.3414600 | 1331.3412242 |
|       | 0.0002358  | -0.0003000 | 0.0000000 |   |    |    |    |   |              |              |
| 4695: | 30         | 13         | 18        | 1 | 29 | 13 | 17 | 0 | 1331.5990900 | 1331.5988020 |
|       | 0.0002880  | -0.0003000 | 0.0000000 |   |    |    |    |   |              |              |
| 4696: | 31         | 13         | 19        | 1 | 30 | 13 | 18 | 0 | 1331.8562900 | 1331.8561967 |
|       | 0.0000933  | -0.0003000 | 0.0000000 |   |    |    |    |   |              |              |
| 4697: | 32         | 13         | 20        | 1 | 31 | 13 | 19 | 0 | 1332.1134000 | 1332.1134066 |
|       | -0.0000066 | -0.0003000 | 0.0000000 |   |    |    |    |   |              |              |
| 4698: | 33         | 13         | 21        | 1 | 32 | 13 | 20 | 0 | 1332.3707400 | 1332.3704303 |
|       | 0.0003097  | -0.0003000 | 0.0000000 |   |    |    |    |   |              |              |
| 4699: | 34         | 13         | 22        | 1 | 33 | 13 | 21 | 0 | 1332.6274300 | 1332.6272664 |
|       | 0.0001636  | -0.0003000 | 0.0000000 |   |    |    |    |   |              |              |
| 4700: | 35         | 13         | 23        | 1 | 34 | 13 | 22 | 0 | 1332.8843500 | 1332.8839133 |
|       | 0.0004367  | -0.0003000 | 0.0000000 |   |    |    |    |   |              |              |
| 4701: | 37         | 13         | 25        | 1 | 36 | 13 | 24 | 0 | 1333.3971200 | 1333.3966335 |
|       | 0.0004865  | -0.0003000 | 0.0000000 |   |    |    |    |   |              |              |
| 4702: | 38         | 13         | 26        | 1 | 37 | 13 | 25 | 0 | 1333.6528600 | 1333.6527039 |
|       | 0.0001561  | -0.0003000 | 0.0000000 |   |    |    |    |   |              |              |
| 4703: | 40         | 13         | 28        | 1 | 39 | 13 | 27 | 0 | 1334.1644200 | 1334.1642575 |
|       | 0.0001625  | -0.0003000 | 0.0000000 |   |    |    |    |   |              |              |
| 4704: | 41         | 13         | 29        | 1 | 40 | 13 | 28 | 0 | 1334.4196700 | 1334.4197378 |
|       | -0.0000678 | -0.0003000 | 0.0000000 |   |    |    |    |   |              |              |
| 4705: | 42         | 13         | 30        | 1 | 41 | 13 | 29 | 0 | 1334.6751000 | 1334.6750183 |
|       | 0.0000817  | -0.0003000 | 0.0000000 |   |    |    |    |   |              |              |
| 4706: | 43         | 13         | 31        | 1 | 42 | 13 | 30 | 0 | 1334.9301600 | 1334.9300976 |
|       | 0.0000624  | -0.0003000 | 0.0000000 |   |    |    |    |   |              |              |
| 4707: | 45         | 13         | 33        | 1 | 44 | 13 | 32 | 0 | 1335.4397900 | 1335.4396463 |
|       | 0.0001437  | -0.0003000 | 0.0000000 |   |    |    |    |   |              |              |
| 4708: | 46         | 13         | 34        | 1 | 45 | 13 | 33 | 0 | 1335.6945300 | 1335.6941127 |
|       | 0.0004173  | -0.0003000 | 0.0000000 |   |    |    |    |   |              |              |
| 4709: | 47         | 13         | 35        | 1 | 46 | 13 | 34 | 0 | 1335.9481600 | 1335.9483717 |
|       | -0.0002117 | -0.0003000 | 0.0000000 |   |    |    |    |   |              |              |
| 4710: | 48         | 13         | 36        | 1 | 47 | 13 | 35 | 0 | 1336.2025500 | 1336.2024217 |

|            |            |           |       |   |                           |
|------------|------------|-----------|-------|---|---------------------------|
| 0.0001283  | -0.0003000 | 0.0000000 |       |   |                           |
| 4711: 49   | 13 37      | 1 48      | 13 36 | 0 | 1336.4561300 1336.4562613 |
| -0.0001313 | -0.0003000 | 0.0000000 |       |   |                           |
| 4712: 50   | 13 38      | 1 49      | 13 37 | 0 | 1336.7101100 1336.7098889 |
| 0.0002211  | -0.0003000 | 0.0000000 |       |   |                           |
| 4713: 51   | 13 39      | 1 50      | 13 38 | 0 | 1336.9632200 1336.9633028 |
| -0.0000828 | -0.0003000 | 0.0000000 |       |   |                           |
| 4714: 52   | 13 40      | 1 51      | 13 39 | 0 | 1337.2167600 1337.2165016 |
| 0.0002584  | -0.0003000 | 0.0000000 |       |   |                           |
| 4715: 53   | 13 41      | 1 52      | 13 40 | 0 | 1337.4691200 1337.4694837 |
| -0.0003637 | -0.0003000 | 0.0000000 |       |   |                           |
| 4716: 54   | 13 42      | 1 53      | 13 41 | 0 | 1337.7221700 1337.7222474 |
| -0.0000774 | -0.0003000 | 0.0000000 |       |   |                           |
| 4717: 55   | 13 43      | 1 54      | 13 42 | 0 | 1337.9745600 1337.9747913 |
| -0.0002313 | -0.0003000 | 0.0000000 |       |   |                           |
| 4718: 56   | 13 44      | 1 55      | 13 43 | 0 | 1338.2272300 1338.2271136 |
| 0.0001164  | -0.0003000 | 0.0000000 |       |   |                           |
| 4719: 57   | 13 45      | 1 56      | 13 44 | 0 | 1338.4794100 1338.4792128 |
| 0.0001972  | -0.0003000 | 0.0000000 |       |   |                           |
| 4720: 58   | 13 46      | 1 57      | 13 45 | 0 | 1338.7313200 1338.7310874 |
| 0.0002326  | -0.0003000 | 0.0000000 |       |   |                           |
| 4721: 59   | 13 47      | 1 58      | 13 46 | 0 | 1338.9823900 1338.9827356 |
| -0.0003456 | -0.0003000 | 0.0000000 |       |   |                           |
| 4722: 60   | 13 48      | 1 59      | 13 47 | 0 | 1339.2339300 1339.2341558 |
| -0.0002258 | -0.0003000 | 0.0000000 |       |   |                           |
| 4723: 61   | 13 49      | 1 60      | 13 48 | 0 | 1339.4850100 1339.4853465 |
| -0.0003365 | -0.0003000 | 0.0000000 |       |   |                           |
| 4724: 62   | 13 50      | 1 61      | 13 49 | 0 | 1339.7359100 1339.7363060 |
| -0.0003960 | -0.0003000 | 0.0000000 |       |   |                           |
| 4725: 64   | 13 52      | 1 63      | 13 51 | 0 | 1340.2375800 1340.2375247 |
| 0.0000553  | -0.0003000 | 0.0000000 |       |   |                           |
| 4726: 65   | 13 53      | 1 64      | 13 52 | 0 | 1340.4881000 1340.4877807 |
| 0.0003193  | -0.0003000 | 0.0000000 |       |   |                           |
| 4727: 66   | 13 54      | 1 65      | 13 53 | 0 | 1340.7375100 1340.7377988 |
| -0.0002888 | -0.0003000 | 0.0000000 |       |   |                           |
| 4728: 67   | 13 55      | 1 66      | 13 54 | 0 | 1340.9872200 1340.9875773 |
| -0.0003573 | -0.0003000 | 0.0000000 |       |   |                           |
| 4729: 68   | 13 56      | 1 67      | 13 55 | 0 | 1341.2372000 1341.2371147 |
| 0.0000853  | -0.0003000 | 0.0000000 |       |   |                           |
| 4730: 69   | 13 57      | 1 68      | 13 56 | 0 | 1341.4860800 1341.4864092 |
| -0.0003292 | -0.0003000 | 0.0000000 |       |   |                           |
| 4731: 70   | 13 58      | 1 69      | 13 57 | 0 | 1341.7356300 1341.7354591 |
| 0.0001709  | -0.0003000 | 0.0000000 |       |   |                           |
| 4732: 71   | 13 59      | 1 70      | 13 58 | 0 | 1341.9843600 1341.9842626 |
| 0.0000974  | -0.0003000 | 0.0000000 |       |   |                           |
| 4733: 72   | 13 60      | 1 71      | 13 59 | 0 | 1342.2331100 1342.2328181 |
| 0.0002919  | -0.0003000 | 0.0000000 |       |   |                           |
| 4734: 73   | 13 61      | 1 72      | 13 60 | 0 | 1342.4813300 1342.4811238 |
| 0.0002062  | -0.0003000 | 0.0000000 |       |   |                           |
| 4735: 74   | 13 62      | 1 73      | 13 61 | 0 | 1342.7290400 1342.7291781 |
| -0.0001381 | -0.0003000 | 0.0000000 |       |   |                           |
| 4736: 75   | 13 63      | 1 74      | 13 62 | 0 | 1342.9774200 1342.9769790 |
| 0.0004410  | -0.0003000 | 0.0000000 |       |   |                           |
| 4737: 76   | 13 64      | 1 75      | 13 63 | 0 | 1343.2246100 1343.2245250 |
| 0.0000850  | -0.0003000 | 0.0000000 |       |   |                           |
| 4738: 77   | 13 65      | 1 76      | 13 64 | 0 | 1343.4717500 1343.4718141 |
| -0.0000641 | -0.0003000 | 0.0000000 |       |   |                           |
| 4739: 78   | 13 66      | 1 77      | 13 65 | 0 | 1343.7190000 1343.7188447 |
| 0.0001553  | -0.0003000 | 0.0000000 |       |   |                           |
| 4740: 79   | 13 67      | 1 78      | 13 66 | 0 | 1343.9658300 1343.9656149 |
| 0.0002151  | -0.0003000 | 0.0000000 |       |   |                           |
| 4741: 80   | 13 68      | 1 79      | 13 67 | 0 | 1344.2123500 1344.2121230 |
| 0.0002270  | -0.0003000 | 0.0000000 |       |   |                           |
| 4742: 81   | 13 69      | 1 80      | 13 68 | 0 | 1344.4589900 1344.4583670 |
| 0.0006230  | -0.0003000 | 0.0000000 |       |   |                           |

|            |            |           |    |   |    |    |    |   |              |              |
|------------|------------|-----------|----|---|----|----|----|---|--------------|--------------|
| 4743:      | 82         | 13        | 70 | 1 | 81 | 13 | 69 | 0 | 1344.7046200 | 1344.7043453 |
| 0.0002747  | -0.0003000 | 0.0000000 |    |   |    |    |    |   |              |              |
| 4744:      | 81         | 14        | 67 | 1 | 82 | 14 | 68 | 0 | 1301.6911100 | 1301.6906466 |
| 0.0004634  | -0.0003000 | 0.0000000 |    |   |    |    |    |   |              |              |
| 4745:      | 80         | 14        | 66 | 1 | 81 | 14 | 67 | 0 | 1301.9584200 | 1301.9587033 |
| -0.0002833 | -0.0003000 | 0.0000000 |    |   |    |    |    |   |              |              |
| 4746:      | 79         | 14        | 65 | 1 | 80 | 14 | 66 | 0 | 1302.2270400 | 1302.2267610 |
| 0.0002790  | -0.0003000 | 0.0000000 |    |   |    |    |    |   |              |              |
| 4747:      | 78         | 14        | 64 | 1 | 79 | 14 | 65 | 0 | 1302.4952000 | 1302.4948179 |
| 0.0003821  | -0.0003000 | 0.0000000 |    |   |    |    |    |   |              |              |
| 4748:      | 77         | 14        | 63 | 1 | 78 | 14 | 64 | 0 | 1302.7625200 | 1302.7628722 |
| -0.0003522 | -0.0003000 | 0.0000000 |    |   |    |    |    |   |              |              |
| 4749:      | 76         | 14        | 62 | 1 | 77 | 14 | 63 | 0 | 1303.0304900 | 1303.0309222 |
| -0.0004322 | -0.0003000 | 0.0000000 |    |   |    |    |    |   |              |              |
| 4750:      | 75         | 14        | 61 | 1 | 76 | 14 | 62 | 0 | 1303.2991000 | 1303.2989659 |
| 0.0001341  | -0.0003000 | 0.0000000 |    |   |    |    |    |   |              |              |
| 4751:      | 74         | 14        | 60 | 1 | 75 | 14 | 61 | 0 | 1303.5669000 | 1303.5670017 |
| -0.0001017 | -0.0003000 | 0.0000000 |    |   |    |    |    |   |              |              |
| 4752:      | 73         | 14        | 59 | 1 | 74 | 14 | 60 | 0 | 1303.8351300 | 1303.8350277 |
| 0.0001023  | -0.0003000 | 0.0000000 |    |   |    |    |    |   |              |              |
| 4753:      | 72         | 14        | 58 | 1 | 73 | 14 | 59 | 0 | 1304.1028800 | 1304.1030421 |
| -0.0001621 | -0.0003000 | 0.0000000 |    |   |    |    |    |   |              |              |
| 4754:      | 71         | 14        | 57 | 1 | 72 | 14 | 58 | 0 | 1304.3710000 | 1304.3710432 |
| -0.0000432 | -0.0003000 | 0.0000000 |    |   |    |    |    |   |              |              |
| 4755:      | 70         | 14        | 56 | 1 | 71 | 14 | 57 | 0 | 1304.6392900 | 1304.6390291 |
| 0.0002609  | -0.0003000 | 0.0000000 |    |   |    |    |    |   |              |              |
| 4756:      | 69         | 14        | 55 | 1 | 70 | 14 | 56 | 0 | 1304.9074600 | 1304.9069980 |
| 0.0004620  | -0.0003000 | 0.0000000 |    |   |    |    |    |   |              |              |
| 4757:      | 68         | 14        | 54 | 1 | 69 | 14 | 55 | 0 | 1305.1753100 | 1305.1749481 |
| 0.0003619  | -0.0003000 | 0.0000000 |    |   |    |    |    |   |              |              |
| 4758:      | 67         | 14        | 53 | 1 | 68 | 14 | 54 | 0 | 1305.4431100 | 1305.4428777 |
| 0.0002323  | -0.0003000 | 0.0000000 |    |   |    |    |    |   |              |              |
| 4759:      | 66         | 14        | 52 | 1 | 67 | 14 | 53 | 0 | 1305.7106900 | 1305.7107849 |
| -0.0000949 | -0.0003000 | 0.0000000 |    |   |    |    |    |   |              |              |
| 4760:      | 65         | 14        | 51 | 1 | 66 | 14 | 52 | 0 | 1305.9785400 | 1305.9786679 |
| -0.0001279 | -0.0003000 | 0.0000000 |    |   |    |    |    |   |              |              |
| 4761:      | 64         | 14        | 50 | 1 | 65 | 14 | 51 | 0 | 1306.2462300 | 1306.2465251 |
| -0.0002951 | -0.0003000 | 0.0000000 |    |   |    |    |    |   |              |              |
| 4762:      | 63         | 14        | 49 | 1 | 64 | 14 | 50 | 0 | 1306.5140500 | 1306.5143544 |
| -0.0003044 | -0.0003000 | 0.0000000 |    |   |    |    |    |   |              |              |
| 4763:      | 62         | 14        | 48 | 1 | 63 | 14 | 49 | 0 | 1306.7816800 | 1306.7821543 |
| -0.0004743 | -0.0003000 | 0.0000000 |    |   |    |    |    |   |              |              |
| 4764:      | 61         | 14        | 47 | 1 | 62 | 14 | 48 | 0 | 1307.0496500 | 1307.0499228 |
| -0.0002728 | -0.0003000 | 0.0000000 |    |   |    |    |    |   |              |              |
| 4765:      | 60         | 14        | 46 | 1 | 61 | 14 | 47 | 0 | 1307.3171100 | 1307.3176582 |
| -0.0005482 | -0.0003000 | 0.0000000 |    |   |    |    |    |   |              |              |
| 4766:      | 59         | 14        | 45 | 1 | 60 | 14 | 46 | 0 | 1307.5850400 | 1307.5853587 |
| -0.0003187 | -0.0003000 | 0.0000000 |    |   |    |    |    |   |              |              |
| 4767:      | 58         | 14        | 44 | 1 | 59 | 14 | 45 | 0 | 1307.8530000 | 1307.8530226 |
| -0.0000226 | -0.0003000 | 0.0000000 |    |   |    |    |    |   |              |              |
| 4768:      | 57         | 14        | 43 | 1 | 58 | 14 | 44 | 0 | 1308.1205700 | 1308.1206480 |
| -0.0000780 | -0.0003000 | 0.0000000 |    |   |    |    |    |   |              |              |
| 4769:      | 56         | 14        | 42 | 1 | 57 | 14 | 43 | 0 | 1308.3881600 | 1308.3882331 |
| -0.0000731 | -0.0003000 | 0.0000000 |    |   |    |    |    |   |              |              |
| 4770:      | 55         | 14        | 41 | 1 | 56 | 14 | 42 | 0 | 1308.6557200 | 1308.6557763 |
| -0.0000563 | -0.0003000 | 0.0000000 |    |   |    |    |    |   |              |              |
| 4771:      | 54         | 14        | 40 | 1 | 55 | 14 | 41 | 0 | 1308.9233100 | 1308.9232756 |
| 0.0000344  | -0.0003000 | 0.0000000 |    |   |    |    |    |   |              |              |
| 4772:      | 53         | 14        | 39 | 1 | 54 | 14 | 40 | 0 | 1309.1906500 | 1309.1907295 |
| -0.0000795 | -0.0003000 | 0.0000000 |    |   |    |    |    |   |              |              |
| 4773:      | 52         | 14        | 38 | 1 | 53 | 14 | 39 | 0 | 1309.4584100 | 1309.4581359 |
| 0.0002741  | -0.0003000 | 0.0000000 |    |   |    |    |    |   |              |              |
| 4774:      | 51         | 14        | 37 | 1 | 52 | 14 | 38 | 0 | 1309.7253200 | 1309.7254933 |
| -0.0001733 | -0.0003000 | 0.0000000 |    |   |    |    |    |   |              |              |
| 4775:      | 50         | 14        | 36 | 1 | 51 | 14 | 37 | 0 | 1309.9928700 | 1309.9927998 |

|            |            |            |   |              |              |
|------------|------------|------------|---|--------------|--------------|
| 0.0000702  | -0.0003000 | 0.0000000  |   |              |              |
| 4776: 49   | 14 35      | 1 50 14 36 | 0 | 1310.2603200 | 1310.2600537 |
| 0.0002663  | -0.0003000 | 0.0000000  |   |              |              |
| 4777: 48   | 14 34      | 1 49 14 35 | 0 | 1310.5272900 | 1310.5272532 |
| 0.0000368  | -0.0003000 | 0.0000000  |   |              |              |
| 4778: 47   | 14 33      | 1 48 14 34 | 0 | 1310.7944900 | 1310.7943966 |
| 0.0000934  | -0.0003000 | 0.0000000  |   |              |              |
| 4779: 46   | 14 32      | 1 47 14 33 | 0 | 1311.0613000 | 1311.0614821 |
| -0.0001821 | -0.0003000 | 0.0000000  |   |              |              |
| 4780: 44   | 14 30      | 1 45 14 31 | 0 | 1311.5955500 | 1311.5954724 |
| 0.0000776  | -0.0003000 | 0.0000000  |   |              |              |
| 4781: 43   | 14 29      | 1 44 14 30 | 0 | 1311.8624800 | 1311.8623737 |
| 0.0001063  | -0.0003000 | 0.0000000  |   |              |              |
| 4782: 42   | 14 28      | 1 43 14 29 | 0 | 1312.1293500 | 1312.1292101 |
| 0.0001399  | -0.0003000 | 0.0000000  |   |              |              |
| 4783: 41   | 14 27      | 1 42 14 28 | 0 | 1312.3962300 | 1312.3959799 |
| 0.0002501  | -0.0003000 | 0.0000000  |   |              |              |
| 4784: 40   | 14 26      | 1 41 14 27 | 0 | 1312.6629700 | 1312.6626814 |
| 0.0002886  | -0.0003000 | 0.0000000  |   |              |              |
| 4785: 38   | 14 24      | 1 39 14 25 | 0 | 1313.1961900 | 1313.1958723 |
| 0.0003177  | -0.0003000 | 0.0000000  |   |              |              |
| 4786: 37   | 14 23      | 1 38 14 24 | 0 | 1313.4622200 | 1313.4623584 |
| -0.0001384 | -0.0003000 | 0.0000000  |   |              |              |
| 4787: 35   | 14 21      | 1 36 14 22 | 0 | 1313.9953800 | 1313.9951030 |
| 0.0002770  | -0.0003000 | 0.0000000  |   |              |              |
| 4788: 34   | 14 20      | 1 35 14 21 | 0 | 1314.2619300 | 1314.2613581 |
| 0.0005719  | -0.0003000 | 0.0000000  |   |              |              |
| 4789: 33   | 14 19      | 1 34 14 20 | 0 | 1314.5278600 | 1314.5275328 |
| 0.0003272  | -0.0003000 | 0.0000000  |   |              |              |
| 4790: 32   | 14 18      | 1 33 14 19 | 0 | 1314.7937500 | 1314.7936254 |
| 0.0001246  | -0.0003000 | 0.0000000  |   |              |              |
| 4791: 31   | 14 17      | 1 32 14 18 | 0 | 1315.0596800 | 1315.0596342 |
| 0.0000458  | -0.0003000 | 0.0000000  |   |              |              |
| 4792: 30   | 14 16      | 1 31 14 17 | 0 | 1315.3259700 | 1315.3255575 |
| 0.0004125  | -0.0003000 | 0.0000000  |   |              |              |
| 4793: 29   | 14 15      | 1 30 14 16 | 0 | 1315.5915300 | 1315.5913936 |
| 0.0001364  | -0.0003000 | 0.0000000  |   |              |              |
| 4794: 28   | 14 14      | 1 29 14 15 | 0 | 1315.8573200 | 1315.8571408 |
| 0.0001792  | -0.0003000 | 0.0000000  |   |              |              |
| 4795: 27   | 14 13      | 1 28 14 14 | 0 | 1316.1226400 | 1316.1227974 |
| -0.0001574 | -0.0003000 | 0.0000000  |   |              |              |
| 4796: 26   | 14 12      | 1 27 14 13 | 0 | 1316.3882200 | 1316.3883618 |
| -0.0001418 | -0.0003000 | 0.0000000  |   |              |              |
| 4797: 24   | 14 10      | 1 25 14 11 | 0 | 1316.9194600 | 1316.9192069 |
| 0.0002531  | -0.0003000 | 0.0000000  |   |              |              |
| 4798: 23   | 14 9       | 1 24 14 10 | 0 | 1317.1844800 | 1317.1844844 |
| -0.0000044 | -0.0003000 | 0.0000000  |   |              |              |
| 4799: 22   | 14 8       | 1 23 14 9  | 0 | 1317.4497300 | 1317.4496629 |
| 0.0000671  | -0.0003000 | 0.0000000  |   |              |              |
| 4800: 21   | 14 7       | 1 22 14 8  | 0 | 1317.7147400 | 1317.7147408 |
| -0.0000008 | -0.0003000 | 0.0000000  |   |              |              |
| 4801: 20   | 14 6       | 1 21 14 7  | 0 | 1317.9799700 | 1317.9797164 |
| 0.0002536  | -0.0003000 | 0.0000000  |   |              |              |
| 4802: 19   | 14 5       | 1 20 14 6  | 0 | 1318.2449000 | 1318.2445880 |
| 0.0003120  | -0.0003000 | 0.0000000  |   |              |              |
| 4803: 18   | 14 4       | 1 19 14 5  | 0 | 1318.5094000 | 1318.5093540 |
| 0.0000460  | -0.0003000 | 0.0000000  |   |              |              |
| 4804: 17   | 14 3       | 1 18 14 4  | 0 | 1318.7738600 | 1318.7740127 |
| -0.0001527 | -0.0003000 | 0.0000000  |   |              |              |
| 4805: 15   | 14 1       | 1 14 14 0  | 0 | 1327.4364200 | 1327.4369501 |
| -0.0005301 | -0.0003000 | 0.0000000  |   |              |              |
| 4806: 16   | 14 2       | 1 15 14 1  | 0 | 1327.6967400 | 1327.6970003 |
| -0.0002603 | -0.0003000 | 0.0000000  |   |              |              |
| 4807: 17   | 14 3       | 1 16 14 2  | 0 | 1327.9570500 | 1327.9568871 |
| 0.0001629  | -0.0003000 | 0.0000000  |   |              |              |

|            |            |           |    |   |    |    |    |   |              |              |
|------------|------------|-----------|----|---|----|----|----|---|--------------|--------------|
| 4808:      | 18         | 14        | 4  | 1 | 17 | 14 | 3  | 0 | 1328.2166200 | 1328.2166089 |
| 0.0000111  | -0.0003000 | 0.0000000 |    |   |    |    |    |   |              |              |
| 4809:      | 19         | 14        | 5  | 1 | 18 | 14 | 4  | 0 | 1328.4762200 | 1328.4761643 |
| 0.0000557  | -0.0003000 | 0.0000000 |    |   |    |    |    |   |              |              |
| 4810:      | 20         | 14        | 6  | 1 | 19 | 14 | 5  | 0 | 1328.7360000 | 1328.7355514 |
| 0.0004486  | -0.0003000 | 0.0000000 |    |   |    |    |    |   |              |              |
| 4811:      | 21         | 14        | 7  | 1 | 20 | 14 | 6  | 0 | 1328.9947300 | 1328.9947689 |
| -0.0000389 | -0.0003000 | 0.0000000 |    |   |    |    |    |   |              |              |
| 4812:      | 22         | 14        | 8  | 1 | 21 | 14 | 7  | 0 | 1329.2537700 | 1329.2538151 |
| -0.0000451 | -0.0003000 | 0.0000000 |    |   |    |    |    |   |              |              |
| 4813:      | 23         | 14        | 9  | 1 | 22 | 14 | 8  | 0 | 1329.5130600 | 1329.5126884 |
| 0.0003716  | -0.0003000 | 0.0000000 |    |   |    |    |    |   |              |              |
| 4814:      | 24         | 14        | 10 | 1 | 23 | 14 | 9  | 0 | 1329.7717200 | 1329.7713872 |
| 0.0003328  | -0.0003000 | 0.0000000 |    |   |    |    |    |   |              |              |
| 4815:      | 25         | 14        | 11 | 1 | 24 | 14 | 10 | 0 | 1330.0301200 | 1330.0299100 |
| 0.0002100  | -0.0003000 | 0.0000000 |    |   |    |    |    |   |              |              |
| 4816:      | 26         | 14        | 12 | 1 | 25 | 14 | 11 | 0 | 1330.2884800 | 1330.2882552 |
| 0.0002248  | -0.0003000 | 0.0000000 |    |   |    |    |    |   |              |              |
| 4817:      | 27         | 14        | 13 | 1 | 26 | 14 | 12 | 0 | 1330.5464700 | 1330.5464211 |
| 0.0000489  | -0.0003000 | 0.0000000 |    |   |    |    |    |   |              |              |
| 4818:      | 28         | 14        | 14 | 1 | 27 | 14 | 13 | 0 | 1330.8045100 | 1330.8044062 |
| 0.0001038  | -0.0003000 | 0.0000000 |    |   |    |    |    |   |              |              |
| 4819:      | 29         | 14        | 15 | 1 | 28 | 14 | 14 | 0 | 1331.0619600 | 1331.0622089 |
| -0.0002489 | -0.0003000 | 0.0000000 |    |   |    |    |    |   |              |              |
| 4820:      | 30         | 14        | 16 | 1 | 29 | 14 | 15 | 0 | 1331.3198600 | 1331.3198276 |
| 0.0000324  | -0.0003000 | 0.0000000 |    |   |    |    |    |   |              |              |
| 4821:      | 31         | 14        | 17 | 1 | 30 | 14 | 16 | 0 | 1331.5773200 | 1331.5772608 |
| 0.0000592  | -0.0003000 | 0.0000000 |    |   |    |    |    |   |              |              |
| 4822:      | 32         | 14        | 18 | 1 | 31 | 14 | 17 | 0 | 1331.8349900 | 1331.8345067 |
| 0.0004833  | -0.0003000 | 0.0000000 |    |   |    |    |    |   |              |              |
| 4823:      | 33         | 14        | 19 | 1 | 32 | 14 | 18 | 0 | 1332.0915400 | 1332.0915637 |
| -0.0000237 | -0.0003000 | 0.0000000 |    |   |    |    |    |   |              |              |
| 4824:      | 34         | 14        | 20 | 1 | 33 | 14 | 19 | 0 | 1332.3485600 | 1332.3484304 |
| 0.0001296  | -0.0003000 | 0.0000000 |    |   |    |    |    |   |              |              |
| 4825:      | 35         | 14        | 21 | 1 | 34 | 14 | 20 | 0 | 1332.6046200 | 1332.6051051 |
| -0.0004851 | -0.0003000 | 0.0000000 |    |   |    |    |    |   |              |              |
| 4826:      | 36         | 14        | 22 | 1 | 35 | 14 | 21 | 0 | 1332.8616200 | 1332.8615861 |
| 0.0000339  | -0.0003000 | 0.0000000 |    |   |    |    |    |   |              |              |
| 4827:      | 37         | 14        | 23 | 1 | 36 | 14 | 22 | 0 | 1333.1180300 | 1333.1178718 |
| 0.0001582  | -0.0003000 | 0.0000000 |    |   |    |    |    |   |              |              |
| 4828:      | 38         | 14        | 24 | 1 | 37 | 14 | 23 | 0 | 1333.3737000 | 1333.3739607 |
| -0.0002607 | -0.0003000 | 0.0000000 |    |   |    |    |    |   |              |              |
| 4829:      | 42         | 14        | 28 | 1 | 41 | 14 | 27 | 0 | 1334.3966200 | 1334.3963148 |
| 0.0003052  | -0.0003000 | 0.0000000 |    |   |    |    |    |   |              |              |
| 4830:      | 43         | 14        | 29 | 1 | 42 | 14 | 28 | 0 | 1334.6513800 | 1334.6513948 |
| -0.0000148 | -0.0003000 | 0.0000000 |    |   |    |    |    |   |              |              |
| 4831:      | 44         | 14        | 30 | 1 | 43 | 14 | 29 | 0 | 1334.9063500 | 1334.9062681 |
| 0.0000819  | -0.0003000 | 0.0000000 |    |   |    |    |    |   |              |              |
| 4832:      | 45         | 14        | 31 | 1 | 44 | 14 | 30 | 0 | 1335.1610700 | 1335.1609331 |
| 0.0001369  | -0.0003000 | 0.0000000 |    |   |    |    |    |   |              |              |
| 4833:      | 46         | 14        | 32 | 1 | 45 | 14 | 31 | 0 | 1335.4155500 | 1335.4153880 |
| 0.0001620  | -0.0003000 | 0.0000000 |    |   |    |    |    |   |              |              |
| 4834:      | 47         | 14        | 33 | 1 | 46 | 14 | 32 | 0 | 1335.6695800 | 1335.6696313 |
| -0.0000513 | -0.0003000 | 0.0000000 |    |   |    |    |    |   |              |              |
| 4835:      | 48         | 14        | 34 | 1 | 47 | 14 | 33 | 0 | 1335.9239500 | 1335.9236612 |
| 0.0002888  | -0.0003000 | 0.0000000 |    |   |    |    |    |   |              |              |
| 4836:      | 49         | 14        | 35 | 1 | 48 | 14 | 34 | 0 | 1336.1779600 | 1336.1774760 |
| 0.0004840  | -0.0003000 | 0.0000000 |    |   |    |    |    |   |              |              |
| 4837:      | 50         | 14        | 36 | 1 | 49 | 14 | 35 | 0 | 1336.4311400 | 1336.4310742 |
| 0.0000658  | -0.0003000 | 0.0000000 |    |   |    |    |    |   |              |              |
| 4838:      | 51         | 14        | 37 | 1 | 50 | 14 | 36 | 0 | 1336.6842700 | 1336.6844539 |
| -0.0001839 | -0.0003000 | 0.0000000 |    |   |    |    |    |   |              |              |
| 4839:      | 52         | 14        | 38 | 1 | 51 | 14 | 37 | 0 | 1336.9375300 | 1336.9376136 |
| -0.0000836 | -0.0003000 | 0.0000000 |    |   |    |    |    |   |              |              |
| 4840:      | 53         | 14        | 39 | 1 | 52 | 14 | 38 | 0 | 1337.1904000 | 1337.1905515 |

|            |            |            |   |                           |
|------------|------------|------------|---|---------------------------|
| -0.0001515 | -0.0003000 | 0.0000000  |   |                           |
| 4841: 54   | 14 40      | 1 53 14 39 | 0 | 1337.4432600 1337.4432658 |
| -0.0000058 | -0.0003000 | 0.0000000  |   |                           |
| 4842: 55   | 14 41      | 1 54 14 40 | 0 | 1337.6958600 1337.6957550 |
| 0.0001050  | -0.0003000 | 0.0000000  |   |                           |
| 4843: 56   | 14 42      | 1 55 14 41 | 0 | 1337.9478000 1337.9480171 |
| -0.0002171 | -0.0003000 | 0.0000000  |   |                           |
| 4844: 57   | 14 43      | 1 56 14 42 | 0 | 1338.2000000 1338.2000506 |
| -0.0000506 | -0.0003000 | 0.0000000  |   |                           |
| 4845: 58   | 14 44      | 1 57 14 43 | 0 | 1338.4517700 1338.4518537 |
| -0.0000837 | -0.0003000 | 0.0000000  |   |                           |
| 4846: 59   | 14 45      | 1 58 14 44 | 0 | 1338.7032100 1338.7034246 |
| -0.0002146 | -0.0003000 | 0.0000000  |   |                           |
| 4847: 60   | 14 46      | 1 59 14 45 | 0 | 1338.9548900 1338.9547616 |
| 0.0001284  | -0.0003000 | 0.0000000  |   |                           |
| 4848: 61   | 14 47      | 1 60 14 46 | 0 | 1339.2057800 1339.2058629 |
| -0.0000829 | -0.0003000 | 0.0000000  |   |                           |
| 4849: 62   | 14 48      | 1 61 14 47 | 0 | 1339.4567900 1339.4567268 |
| 0.0000632  | -0.0003000 | 0.0000000  |   |                           |
| 4850: 63   | 14 49      | 1 62 14 48 | 0 | 1339.7074200 1339.7073514 |
| 0.0000686  | -0.0003000 | 0.0000000  |   |                           |
| 4851: 64   | 14 50      | 1 63 14 49 | 0 | 1339.9579200 1339.9577350 |
| 0.0001850  | -0.0003000 | 0.0000000  |   |                           |
| 4852: 65   | 14 51      | 1 64 14 50 | 0 | 1340.2078600 1340.2078757 |
| -0.0000157 | -0.0003000 | 0.0000000  |   |                           |
| 4853: 66   | 14 52      | 1 65 14 51 | 0 | 1340.4580300 1340.4577719 |
| 0.0002581  | -0.0003000 | 0.0000000  |   |                           |
| 4854: 67   | 14 53      | 1 66 14 52 | 0 | 1340.7074200 1340.7074215 |
| -0.0000015 | -0.0003000 | 0.0000000  |   |                           |
| 4855: 68   | 14 54      | 1 67 14 53 | 0 | 1340.9565400 1340.9568230 |
| -0.0002830 | -0.0003000 | 0.0000000  |   |                           |
| 4856: 69   | 14 55      | 1 68 14 54 | 0 | 1341.2059200 1341.2059743 |
| -0.0000543 | -0.0003000 | 0.0000000  |   |                           |
| 4857: 70   | 14 56      | 1 69 14 55 | 0 | 1341.4548300 1341.4548736 |
| -0.0000436 | -0.0003000 | 0.0000000  |   |                           |
| 4858: 71   | 14 57      | 1 70 14 56 | 0 | 1341.7034200 1341.7035192 |
| -0.0000992 | -0.0003000 | 0.0000000  |   |                           |
| 4859: 72   | 14 58      | 1 71 14 57 | 0 | 1341.9518400 1341.9519091 |
| -0.0000691 | -0.0003000 | 0.0000000  |   |                           |
| 4860: 73   | 14 59      | 1 72 14 58 | 0 | 1342.1997400 1342.2000414 |
| -0.0003014 | -0.0003000 | 0.0000000  |   |                           |
| 4861: 74   | 14 60      | 1 73 14 59 | 0 | 1342.4479900 1342.4479143 |
| 0.0000757  | -0.0003000 | 0.0000000  |   |                           |
| 4862: 75   | 14 61      | 1 74 14 60 | 0 | 1342.6955300 1342.6955259 |
| 0.0000041  | -0.0003000 | 0.0000000  |   |                           |
| 4863: 76   | 14 62      | 1 75 14 61 | 0 | 1342.9433200 1342.9428743 |
| 0.0004457  | -0.0003000 | 0.0000000  |   |                           |
| 4864: 77   | 14 63      | 1 76 14 62 | 0 | 1343.1902500 1343.1899575 |
| 0.0002925  | -0.0003000 | 0.0000000  |   |                           |
| 4865: 78   | 14 64      | 1 77 14 63 | 0 | 1343.4371200 1343.4367736 |
| 0.0003464  | -0.0003000 | 0.0000000  |   |                           |
| 4866: 79   | 14 65      | 1 78 14 64 | 0 | 1343.6840200 1343.6833207 |
| 0.0006993  | -0.0003000 | 0.0000000  |   |                           |
| 4867: 80   | 14 66      | 1 79 14 65 | 0 | 1343.9299500 1343.9295969 |
| 0.0003531  | -0.0003000 | 0.0000000  |   |                           |
| 4868: 82   | 14 68      | 1 81 14 67 | 0 | 1344.4214200 1344.4213284 |
| 0.0000916  | -0.0003000 | 0.0000000  |   |                           |
| 4869: 83   | 14 69      | 1 82 14 68 | 0 | 1344.6669500 1344.6667799 |
| 0.0001701  | -0.0003000 | 0.0000000  |   |                           |
| 4870: 85   | 14 71      | 1 84 14 70 | 0 | 1345.1567900 1345.1568441 |
| -0.0000541 | -0.0003000 | 0.0000000  |   |                           |
| 4871: 81   | 14 68      | 1 82 14 69 | 0 | 1301.6911100 1301.6906466 |
| 0.0004634  | -0.0003000 | 0.0000000  |   |                           |
| 4872: 80   | 14 67      | 1 81 14 68 | 0 | 1301.9584200 1301.9587033 |
| -0.0002833 | -0.0003000 | 0.0000000  |   |                           |

|                                 |              |              |
|---------------------------------|--------------|--------------|
| 4873: 79 14 66 1 80 14 67 0     | 1302.2270400 | 1302.2267610 |
| 0.0002790 -0.0003000 0.0000000  |              |              |
| 4874: 78 14 65 1 79 14 66 0     | 1302.4952000 | 1302.4948179 |
| 0.0003821 -0.0003000 0.0000000  |              |              |
| 4875: 77 14 64 1 78 14 65 0     | 1302.7625200 | 1302.7628722 |
| -0.0003522 -0.0003000 0.0000000 |              |              |
| 4876: 76 14 63 1 77 14 64 0     | 1303.0304900 | 1303.0309222 |
| -0.0004322 -0.0003000 0.0000000 |              |              |
| 4877: 75 14 62 1 76 14 63 0     | 1303.2991000 | 1303.2989659 |
| 0.0001341 -0.0003000 0.0000000  |              |              |
| 4878: 74 14 61 1 75 14 62 0     | 1303.5669000 | 1303.5670017 |
| -0.0001017 -0.0003000 0.0000000 |              |              |
| 4879: 73 14 60 1 74 14 61 0     | 1303.8351300 | 1303.8350277 |
| 0.0001023 -0.0003000 0.0000000  |              |              |
| 4880: 72 14 59 1 73 14 60 0     | 1304.1028800 | 1304.1030421 |
| -0.0001621 -0.0003000 0.0000000 |              |              |
| 4881: 71 14 58 1 72 14 59 0     | 1304.3710000 | 1304.3710432 |
| -0.0000432 -0.0003000 0.0000000 |              |              |
| 4882: 70 14 57 1 71 14 58 0     | 1304.6392900 | 1304.6390291 |
| 0.0002609 -0.0003000 0.0000000  |              |              |
| 4883: 69 14 56 1 70 14 57 0     | 1304.9074600 | 1304.9069980 |
| 0.0004620 -0.0003000 0.0000000  |              |              |
| 4884: 68 14 55 1 69 14 56 0     | 1305.1753100 | 1305.1749481 |
| 0.0003619 -0.0003000 0.0000000  |              |              |
| 4885: 67 14 54 1 68 14 55 0     | 1305.4431100 | 1305.4428777 |
| 0.0002323 -0.0003000 0.0000000  |              |              |
| 4886: 66 14 53 1 67 14 54 0     | 1305.7106900 | 1305.7107849 |
| -0.0000949 -0.0003000 0.0000000 |              |              |
| 4887: 65 14 52 1 66 14 53 0     | 1305.9785400 | 1305.9786679 |
| -0.0001279 -0.0003000 0.0000000 |              |              |
| 4888: 64 14 51 1 65 14 52 0     | 1306.2462300 | 1306.2465251 |
| -0.0002951 -0.0003000 0.0000000 |              |              |
| 4889: 63 14 50 1 64 14 51 0     | 1306.5140500 | 1306.5143544 |
| -0.0003044 -0.0003000 0.0000000 |              |              |
| 4890: 62 14 49 1 63 14 50 0     | 1306.7816800 | 1306.7821543 |
| -0.0004743 -0.0003000 0.0000000 |              |              |
| 4891: 61 14 48 1 62 14 49 0     | 1307.0496500 | 1307.0499228 |
| -0.0002728 -0.0003000 0.0000000 |              |              |
| 4892: 60 14 47 1 61 14 48 0     | 1307.3171100 | 1307.3176582 |
| -0.0005482 -0.0003000 0.0000000 |              |              |
| 4893: 59 14 46 1 60 14 47 0     | 1307.5850400 | 1307.5853587 |
| -0.0003187 -0.0003000 0.0000000 |              |              |
| 4894: 58 14 45 1 59 14 46 0     | 1307.8530000 | 1307.8530226 |
| -0.0000226 -0.0003000 0.0000000 |              |              |
| 4895: 57 14 44 1 58 14 45 0     | 1308.1205700 | 1308.1206480 |
| -0.0000780 -0.0003000 0.0000000 |              |              |
| 4896: 56 14 43 1 57 14 44 0     | 1308.3881600 | 1308.3882331 |
| -0.0000731 -0.0003000 0.0000000 |              |              |
| 4897: 55 14 42 1 56 14 43 0     | 1308.6557200 | 1308.6557763 |
| -0.0000563 -0.0003000 0.0000000 |              |              |
| 4898: 54 14 41 1 55 14 42 0     | 1308.9233100 | 1308.9232756 |
| 0.0000344 -0.0003000 0.0000000  |              |              |
| 4899: 53 14 40 1 54 14 41 0     | 1309.1906500 | 1309.1907295 |
| -0.0000795 -0.0003000 0.0000000 |              |              |
| 4900: 52 14 39 1 53 14 40 0     | 1309.4584100 | 1309.4581359 |
| 0.0002741 -0.0003000 0.0000000  |              |              |
| 4901: 51 14 38 1 52 14 39 0     | 1309.7253200 | 1309.7254933 |
| -0.0001733 -0.0003000 0.0000000 |              |              |
| 4902: 50 14 37 1 51 14 38 0     | 1309.9928700 | 1309.9927998 |
| 0.0000702 -0.0003000 0.0000000  |              |              |
| 4903: 49 14 36 1 50 14 37 0     | 1310.2603200 | 1310.2600537 |
| 0.0002663 -0.0003000 0.0000000  |              |              |
| 4904: 48 14 35 1 49 14 36 0     | 1310.5272900 | 1310.5272532 |
| 0.0000368 -0.0003000 0.0000000  |              |              |
| 4905: 47 14 34 1 48 14 35 0     | 1310.7944900 | 1310.7943966 |

|            |            |           |              |              |
|------------|------------|-----------|--------------|--------------|
| 0.0000934  | -0.0003000 | 0.0000000 |              |              |
| 4906:      | 46         | 14        | 33           | 1 47 14 34 0 |
| -0.0001821 | -0.0003000 | 0.0000000 | 1311.0613000 | 1311.0614821 |
| 4907:      | 44         | 14        | 31           | 1 45 14 32 0 |
| 0.0000776  | -0.0003000 | 0.0000000 | 1311.5955500 | 1311.5954724 |
| 4908:      | 43         | 14        | 30           | 1 44 14 31 0 |
| 0.0001063  | -0.0003000 | 0.0000000 | 1311.8624800 | 1311.8623737 |
| 4909:      | 42         | 14        | 29           | 1 43 14 30 0 |
| 0.0001399  | -0.0003000 | 0.0000000 | 1312.1293500 | 1312.1292101 |
| 4910:      | 41         | 14        | 28           | 1 42 14 29 0 |
| 0.0002501  | -0.0003000 | 0.0000000 | 1312.3962300 | 1312.3959799 |
| 4911:      | 40         | 14        | 27           | 1 41 14 28 0 |
| 0.0002886  | -0.0003000 | 0.0000000 | 1312.6629700 | 1312.6626814 |
| 4912:      | 38         | 14        | 25           | 1 39 14 26 0 |
| 0.0003177  | -0.0003000 | 0.0000000 | 1313.1961900 | 1313.1958723 |
| 4913:      | 37         | 14        | 24           | 1 38 14 25 0 |
| -0.0001384 | -0.0003000 | 0.0000000 | 1313.4622200 | 1313.4623584 |
| 4914:      | 35         | 14        | 22           | 1 36 14 23 0 |
| 0.0002770  | -0.0003000 | 0.0000000 | 1313.9953800 | 1313.9951030 |
| 4915:      | 34         | 14        | 21           | 1 35 14 22 0 |
| 0.0005719  | -0.0003000 | 0.0000000 | 1314.2619300 | 1314.2613581 |
| 4916:      | 33         | 14        | 20           | 1 34 14 21 0 |
| 0.0003272  | -0.0003000 | 0.0000000 | 1314.5278600 | 1314.5275328 |
| 4917:      | 32         | 14        | 19           | 1 33 14 20 0 |
| 0.0001246  | -0.0003000 | 0.0000000 | 1314.7937500 | 1314.7936254 |
| 4918:      | 31         | 14        | 18           | 1 32 14 19 0 |
| 0.0000458  | -0.0003000 | 0.0000000 | 1315.0596800 | 1315.0596342 |
| 4919:      | 30         | 14        | 17           | 1 31 14 18 0 |
| 0.0004125  | -0.0003000 | 0.0000000 | 1315.3259700 | 1315.3255575 |
| 4920:      | 29         | 14        | 16           | 1 30 14 17 0 |
| 0.0001364  | -0.0003000 | 0.0000000 | 1315.5915300 | 1315.5913936 |
| 4921:      | 28         | 14        | 15           | 1 29 14 16 0 |
| 0.0001792  | -0.0003000 | 0.0000000 | 1315.8573200 | 1315.8571408 |
| 4922:      | 27         | 14        | 14           | 1 28 14 15 0 |
| -0.0001574 | -0.0003000 | 0.0000000 | 1316.1226400 | 1316.1227974 |
| 4923:      | 26         | 14        | 13           | 1 27 14 14 0 |
| -0.0001418 | -0.0003000 | 0.0000000 | 1316.3882200 | 1316.3883618 |
| 4924:      | 24         | 14        | 11           | 1 25 14 12 0 |
| 0.0002531  | -0.0003000 | 0.0000000 | 1316.9194600 | 1316.9192069 |
| 4925:      | 23         | 14        | 10           | 1 24 14 11 0 |
| -0.0000044 | -0.0003000 | 0.0000000 | 1317.1844800 | 1317.1844844 |
| 4926:      | 22         | 14        | 9            | 1 23 14 10 0 |
| 0.0000671  | -0.0003000 | 0.0000000 | 1317.4497300 | 1317.4496629 |
| 4927:      | 21         | 14        | 8            | 1 22 14 9 0  |
| -0.0000008 | -0.0003000 | 0.0000000 | 1317.7147400 | 1317.7147408 |
| 4928:      | 20         | 14        | 7            | 1 21 14 8 0  |
| 0.0002536  | -0.0003000 | 0.0000000 | 1317.9799700 | 1317.9797164 |
| 4929:      | 19         | 14        | 6            | 1 20 14 7 0  |
| 0.0003120  | -0.0003000 | 0.0000000 | 1318.2449000 | 1318.2445880 |
| 4930:      | 18         | 14        | 5            | 1 19 14 6 0  |
| 0.0000460  | -0.0003000 | 0.0000000 | 1318.5094000 | 1318.5093540 |
| 4931:      | 17         | 14        | 4            | 1 18 14 5 0  |
| -0.0001527 | -0.0003000 | 0.0000000 | 1318.7738600 | 1318.7740127 |
| 4932:      | 15         | 14        | 2            | 1 14 14 1 0  |
| -0.0005301 | -0.0003000 | 0.0000000 | 1327.4364200 | 1327.4369501 |
| 4933:      | 16         | 14        | 3            | 1 15 14 2 0  |
| -0.0002603 | -0.0003000 | 0.0000000 | 1327.6967400 | 1327.6970003 |
| 4934:      | 17         | 14        | 4            | 1 16 14 3 0  |
| 0.0001629  | -0.0003000 | 0.0000000 | 1327.9570500 | 1327.9568871 |
| 4935:      | 18         | 14        | 5            | 1 17 14 4 0  |
| 0.0000111  | -0.0003000 | 0.0000000 | 1328.2166200 | 1328.2166089 |
| 4936:      | 19         | 14        | 6            | 1 18 14 5 0  |
| 0.0000557  | -0.0003000 | 0.0000000 | 1328.4762200 | 1328.4761643 |
| 4937:      | 20         | 14        | 7            | 1 19 14 6 0  |
| 0.0004486  | -0.0003000 | 0.0000000 | 1328.7360000 | 1328.7355514 |

|            |            |           |    |   |    |    |    |   |              |              |
|------------|------------|-----------|----|---|----|----|----|---|--------------|--------------|
| 4938:      | 21         | 14        | 8  | 1 | 20 | 14 | 7  | 0 | 1328.9947300 | 1328.9947689 |
| -0.0000389 | -0.0003000 | 0.0000000 |    |   |    |    |    |   |              |              |
| 4939:      | 22         | 14        | 9  | 1 | 21 | 14 | 8  | 0 | 1329.2537700 | 1329.2538151 |
| -0.0000451 | -0.0003000 | 0.0000000 |    |   |    |    |    |   |              |              |
| 4940:      | 23         | 14        | 10 | 1 | 22 | 14 | 9  | 0 | 1329.5130600 | 1329.5126884 |
| 0.0003716  | -0.0003000 | 0.0000000 |    |   |    |    |    |   |              |              |
| 4941:      | 24         | 14        | 11 | 1 | 23 | 14 | 10 | 0 | 1329.7717200 | 1329.7713872 |
| 0.0003328  | -0.0003000 | 0.0000000 |    |   |    |    |    |   |              |              |
| 4942:      | 25         | 14        | 12 | 1 | 24 | 14 | 11 | 0 | 1330.0301200 | 1330.0299100 |
| 0.0002100  | -0.0003000 | 0.0000000 |    |   |    |    |    |   |              |              |
| 4943:      | 26         | 14        | 13 | 1 | 25 | 14 | 12 | 0 | 1330.2884800 | 1330.2882552 |
| 0.0002248  | -0.0003000 | 0.0000000 |    |   |    |    |    |   |              |              |
| 4944:      | 27         | 14        | 14 | 1 | 26 | 14 | 13 | 0 | 1330.5464700 | 1330.5464211 |
| 0.0000489  | -0.0003000 | 0.0000000 |    |   |    |    |    |   |              |              |
| 4945:      | 28         | 14        | 15 | 1 | 27 | 14 | 14 | 0 | 1330.8045100 | 1330.8044062 |
| 0.0001038  | -0.0003000 | 0.0000000 |    |   |    |    |    |   |              |              |
| 4946:      | 29         | 14        | 16 | 1 | 28 | 14 | 15 | 0 | 1331.0619600 | 1331.0622089 |
| -0.0002489 | -0.0003000 | 0.0000000 |    |   |    |    |    |   |              |              |
| 4947:      | 30         | 14        | 17 | 1 | 29 | 14 | 16 | 0 | 1331.3198600 | 1331.3198276 |
| 0.0000324  | -0.0003000 | 0.0000000 |    |   |    |    |    |   |              |              |
| 4948:      | 31         | 14        | 18 | 1 | 30 | 14 | 17 | 0 | 1331.5773200 | 1331.5772608 |
| 0.0000592  | -0.0003000 | 0.0000000 |    |   |    |    |    |   |              |              |
| 4949:      | 32         | 14        | 19 | 1 | 31 | 14 | 18 | 0 | 1331.8349900 | 1331.8345067 |
| 0.0004833  | -0.0003000 | 0.0000000 |    |   |    |    |    |   |              |              |
| 4950:      | 33         | 14        | 20 | 1 | 32 | 14 | 19 | 0 | 1332.0915400 | 1332.0915637 |
| -0.0000237 | -0.0003000 | 0.0000000 |    |   |    |    |    |   |              |              |
| 4951:      | 34         | 14        | 21 | 1 | 33 | 14 | 20 | 0 | 1332.3485600 | 1332.3484304 |
| 0.0001296  | -0.0003000 | 0.0000000 |    |   |    |    |    |   |              |              |
| 4952:      | 35         | 14        | 22 | 1 | 34 | 14 | 21 | 0 | 1332.6046200 | 1332.6051051 |
| -0.0004851 | -0.0003000 | 0.0000000 |    |   |    |    |    |   |              |              |
| 4953:      | 36         | 14        | 23 | 1 | 35 | 14 | 22 | 0 | 1332.8616200 | 1332.8615861 |
| 0.0000339  | -0.0003000 | 0.0000000 |    |   |    |    |    |   |              |              |
| 4954:      | 37         | 14        | 24 | 1 | 36 | 14 | 23 | 0 | 1333.1180300 | 1333.1178718 |
| 0.0001582  | -0.0003000 | 0.0000000 |    |   |    |    |    |   |              |              |
| 4955:      | 38         | 14        | 25 | 1 | 37 | 14 | 24 | 0 | 1333.3737000 | 1333.3739607 |
| -0.0002607 | -0.0003000 | 0.0000000 |    |   |    |    |    |   |              |              |
| 4956:      | 42         | 14        | 29 | 1 | 41 | 14 | 28 | 0 | 1334.3966200 | 1334.3963148 |
| 0.0003052  | -0.0003000 | 0.0000000 |    |   |    |    |    |   |              |              |
| 4957:      | 43         | 14        | 30 | 1 | 42 | 14 | 29 | 0 | 1334.6513800 | 1334.6513948 |
| -0.0000148 | -0.0003000 | 0.0000000 |    |   |    |    |    |   |              |              |
| 4958:      | 44         | 14        | 31 | 1 | 43 | 14 | 30 | 0 | 1334.9063500 | 1334.9062681 |
| 0.0000819  | -0.0003000 | 0.0000000 |    |   |    |    |    |   |              |              |
| 4959:      | 45         | 14        | 32 | 1 | 44 | 14 | 31 | 0 | 1335.1610700 | 1335.1609331 |
| 0.0001369  | -0.0003000 | 0.0000000 |    |   |    |    |    |   |              |              |
| 4960:      | 46         | 14        | 33 | 1 | 45 | 14 | 32 | 0 | 1335.4155500 | 1335.4153880 |
| 0.0001620  | -0.0003000 | 0.0000000 |    |   |    |    |    |   |              |              |
| 4961:      | 47         | 14        | 34 | 1 | 46 | 14 | 33 | 0 | 1335.6695800 | 1335.6696313 |
| -0.0000513 | -0.0003000 | 0.0000000 |    |   |    |    |    |   |              |              |
| 4962:      | 48         | 14        | 35 | 1 | 47 | 14 | 34 | 0 | 1335.9239500 | 1335.9236612 |
| 0.0002888  | -0.0003000 | 0.0000000 |    |   |    |    |    |   |              |              |
| 4963:      | 49         | 14        | 36 | 1 | 48 | 14 | 35 | 0 | 1336.1779600 | 1336.1774760 |
| 0.0004840  | -0.0003000 | 0.0000000 |    |   |    |    |    |   |              |              |
| 4964:      | 50         | 14        | 37 | 1 | 49 | 14 | 36 | 0 | 1336.4311400 | 1336.4310742 |
| 0.0000658  | -0.0003000 | 0.0000000 |    |   |    |    |    |   |              |              |
| 4965:      | 51         | 14        | 38 | 1 | 50 | 14 | 37 | 0 | 1336.6842700 | 1336.6844539 |
| -0.0001839 | -0.0003000 | 0.0000000 |    |   |    |    |    |   |              |              |
| 4966:      | 52         | 14        | 39 | 1 | 51 | 14 | 38 | 0 | 1336.9375300 | 1336.9376136 |
| -0.0000836 | -0.0003000 | 0.0000000 |    |   |    |    |    |   |              |              |
| 4967:      | 53         | 14        | 40 | 1 | 52 | 14 | 39 | 0 | 1337.1904000 | 1337.1905515 |
| -0.0001515 | -0.0003000 | 0.0000000 |    |   |    |    |    |   |              |              |
| 4968:      | 54         | 14        | 41 | 1 | 53 | 14 | 40 | 0 | 1337.4432600 | 1337.4432658 |
| -0.0000058 | -0.0003000 | 0.0000000 |    |   |    |    |    |   |              |              |
| 4969:      | 55         | 14        | 42 | 1 | 54 | 14 | 41 | 0 | 1337.6958600 | 1337.6957550 |
| 0.0001050  | -0.0003000 | 0.0000000 |    |   |    |    |    |   |              |              |
| 4970:      | 56         | 14        | 43 | 1 | 55 | 14 | 42 | 0 | 1337.9478000 | 1337.9480171 |

|            |            |            |   |                           |
|------------|------------|------------|---|---------------------------|
| -0.0002171 | -0.0003000 | 0.0000000  |   |                           |
| 4971: 57   | 14 44      | 1 56 14 43 | 0 | 1338.2000000 1338.2000506 |
| -0.0000506 | -0.0003000 | 0.0000000  |   |                           |
| 4972: 58   | 14 45      | 1 57 14 44 | 0 | 1338.4517700 1338.4518537 |
| -0.0000837 | -0.0003000 | 0.0000000  |   |                           |
| 4973: 59   | 14 46      | 1 58 14 45 | 0 | 1338.7032100 1338.7034246 |
| -0.0002146 | -0.0003000 | 0.0000000  |   |                           |
| 4974: 60   | 14 47      | 1 59 14 46 | 0 | 1338.9548900 1338.9547616 |
| 0.0001284  | -0.0003000 | 0.0000000  |   |                           |
| 4975: 61   | 14 48      | 1 60 14 47 | 0 | 1339.2057800 1339.2058629 |
| -0.0000829 | -0.0003000 | 0.0000000  |   |                           |
| 4976: 62   | 14 49      | 1 61 14 48 | 0 | 1339.4567900 1339.4567268 |
| 0.0000632  | -0.0003000 | 0.0000000  |   |                           |
| 4977: 63   | 14 50      | 1 62 14 49 | 0 | 1339.7074200 1339.7073514 |
| 0.0000686  | -0.0003000 | 0.0000000  |   |                           |
| 4978: 64   | 14 51      | 1 63 14 50 | 0 | 1339.9579200 1339.9577350 |
| 0.0001850  | -0.0003000 | 0.0000000  |   |                           |
| 4979: 65   | 14 52      | 1 64 14 51 | 0 | 1340.2078600 1340.2078757 |
| -0.0000157 | -0.0003000 | 0.0000000  |   |                           |
| 4980: 66   | 14 53      | 1 65 14 52 | 0 | 1340.4580300 1340.4577719 |
| 0.0002581  | -0.0003000 | 0.0000000  |   |                           |
| 4981: 67   | 14 54      | 1 66 14 53 | 0 | 1340.7074200 1340.7074215 |
| -0.0000015 | -0.0003000 | 0.0000000  |   |                           |
| 4982: 68   | 14 55      | 1 67 14 54 | 0 | 1340.9565400 1340.9568230 |
| -0.0002830 | -0.0003000 | 0.0000000  |   |                           |
| 4983: 69   | 14 56      | 1 68 14 55 | 0 | 1341.2059200 1341.2059743 |
| -0.0000543 | -0.0003000 | 0.0000000  |   |                           |
| 4984: 70   | 14 57      | 1 69 14 56 | 0 | 1341.4548300 1341.4548736 |
| -0.0000436 | -0.0003000 | 0.0000000  |   |                           |
| 4985: 71   | 14 58      | 1 70 14 57 | 0 | 1341.7034200 1341.7035192 |
| -0.0000992 | -0.0003000 | 0.0000000  |   |                           |
| 4986: 72   | 14 59      | 1 71 14 58 | 0 | 1341.9518400 1341.9519091 |
| -0.0000691 | -0.0003000 | 0.0000000  |   |                           |
| 4987: 73   | 14 60      | 1 72 14 59 | 0 | 1342.1997400 1342.2000414 |
| -0.0003014 | -0.0003000 | 0.0000000  |   |                           |
| 4988: 74   | 14 61      | 1 73 14 60 | 0 | 1342.4479900 1342.4479143 |
| 0.0000757  | -0.0003000 | 0.0000000  |   |                           |
| 4989: 75   | 14 62      | 1 74 14 61 | 0 | 1342.6955300 1342.6955259 |
| 0.0000041  | -0.0003000 | 0.0000000  |   |                           |
| 4990: 76   | 14 63      | 1 75 14 62 | 0 | 1342.9433200 1342.9428743 |
| 0.0004457  | -0.0003000 | 0.0000000  |   |                           |
| 4991: 77   | 14 64      | 1 76 14 63 | 0 | 1343.1902500 1343.1899575 |
| 0.0002925  | -0.0003000 | 0.0000000  |   |                           |
| 4992: 78   | 14 65      | 1 77 14 64 | 0 | 1343.4371200 1343.4367736 |
| 0.0003464  | -0.0003000 | 0.0000000  |   |                           |
| 4993: 79   | 14 66      | 1 78 14 65 | 0 | 1343.6840200 1343.6833207 |
| 0.0006993  | -0.0003000 | 0.0000000  |   |                           |
| 4994: 80   | 14 67      | 1 79 14 66 | 0 | 1343.9299500 1343.9295969 |
| 0.0003531  | -0.0003000 | 0.0000000  |   |                           |
| 4995: 82   | 14 69      | 1 81 14 68 | 0 | 1344.4214200 1344.4213284 |
| 0.0000916  | -0.0003000 | 0.0000000  |   |                           |
| 4996: 83   | 14 70      | 1 82 14 69 | 0 | 1344.6669500 1344.6667799 |
| 0.0001701  | -0.0003000 | 0.0000000  |   |                           |
| 4997: 85   | 14 72      | 1 84 14 71 | 0 | 1345.1567900 1345.1568441 |
| -0.0000541 | -0.0003000 | 0.0000000  |   |                           |
| 4998: 84   | 15 69      | 1 85 15 70 | 0 | 1300.5848600 1300.5851102 |
| -0.0002502 | -0.0003000 | 0.0000000  |   |                           |
| 4999: 83   | 15 68      | 1 84 15 69 | 0 | 1300.8528100 1300.8530994 |
| -0.0002894 | -0.0003000 | 0.0000000  |   |                           |
| 5000: 82   | 15 67      | 1 83 15 68 | 0 | 1301.1214300 1301.1210956 |
| 0.0003344  | -0.0003000 | 0.0000000  |   |                           |
| 5001: 81   | 15 66      | 1 82 15 67 | 0 | 1301.3886200 1301.3890972 |
| -0.0004772 | -0.0003000 | 0.0000000  |   |                           |
| 5002: 80   | 15 65      | 1 81 15 66 | 0 | 1301.6575200 1301.6571024 |
| 0.0004176  | -0.0003000 | 0.0000000  |   |                           |

|            |            |           |    |   |    |    |    |   |              |              |
|------------|------------|-----------|----|---|----|----|----|---|--------------|--------------|
| 5003:      | 79         | 15        | 64 | 1 | 80 | 15 | 65 | 0 | 1301.9252700 | 1301.9251095 |
| 0.0001605  | -0.0003000 | 0.0000000 |    |   |    |    |    |   |              |              |
| 5004:      | 78         | 15        | 63 | 1 | 79 | 15 | 64 | 0 | 1302.1936600 | 1302.1931166 |
| 0.0005434  | -0.0003000 | 0.0000000 |    |   |    |    |    |   |              |              |
| 5005:      | 77         | 15        | 62 | 1 | 78 | 15 | 63 | 0 | 1302.4612200 | 1302.4611221 |
| 0.0000979  | -0.0003000 | 0.0000000 |    |   |    |    |    |   |              |              |
| 5006:      | 76         | 15        | 61 | 1 | 77 | 15 | 62 | 0 | 1302.7287600 | 1302.7291242 |
| -0.0003642 | -0.0003000 | 0.0000000 |    |   |    |    |    |   |              |              |
| 5007:      | 75         | 15        | 60 | 1 | 76 | 15 | 61 | 0 | 1302.9970200 | 1302.9971212 |
| -0.0001012 | -0.0003000 | 0.0000000 |    |   |    |    |    |   |              |              |
| 5008:      | 74         | 15        | 59 | 1 | 75 | 15 | 60 | 0 | 1303.2647300 | 1303.2651113 |
| -0.0003813 | -0.0003000 | 0.0000000 |    |   |    |    |    |   |              |              |
| 5009:      | 73         | 15        | 58 | 1 | 74 | 15 | 59 | 0 | 1303.5332100 | 1303.5330927 |
| 0.0001173  | -0.0003000 | 0.0000000 |    |   |    |    |    |   |              |              |
| 5010:      | 72         | 15        | 57 | 1 | 73 | 15 | 58 | 0 | 1303.8005500 | 1303.8010636 |
| -0.0005136 | -0.0003000 | 0.0000000 |    |   |    |    |    |   |              |              |
| 5011:      | 71         | 15        | 56 | 1 | 72 | 15 | 57 | 0 | 1304.0690100 | 1304.0690225 |
| -0.0000125 | -0.0003000 | 0.0000000 |    |   |    |    |    |   |              |              |
| 5012:      | 70         | 15        | 55 | 1 | 71 | 15 | 56 | 0 | 1304.3366000 | 1304.3369673 |
| -0.0003673 | -0.0003000 | 0.0000000 |    |   |    |    |    |   |              |              |
| 5013:      | 69         | 15        | 54 | 1 | 70 | 15 | 55 | 0 | 1304.6048700 | 1304.6048966 |
| -0.0000266 | -0.0003000 | 0.0000000 |    |   |    |    |    |   |              |              |
| 5014:      | 68         | 15        | 53 | 1 | 69 | 15 | 54 | 0 | 1304.8729600 | 1304.8728083 |
| 0.0001517  | -0.0003000 | 0.0000000 |    |   |    |    |    |   |              |              |
| 5015:      | 67         | 15        | 52 | 1 | 68 | 15 | 53 | 0 | 1305.1405100 | 1305.1407009 |
| -0.0001909 | -0.0003000 | 0.0000000 |    |   |    |    |    |   |              |              |
| 5016:      | 66         | 15        | 51 | 1 | 67 | 15 | 52 | 0 | 1305.4087500 | 1305.4085725 |
| 0.0001775  | -0.0003000 | 0.0000000 |    |   |    |    |    |   |              |              |
| 5017:      | 64         | 15        | 49 | 1 | 65 | 15 | 50 | 0 | 1305.9442300 | 1305.9442458 |
| -0.0000158 | -0.0003000 | 0.0000000 |    |   |    |    |    |   |              |              |
| 5018:      | 63         | 15        | 48 | 1 | 64 | 15 | 49 | 0 | 1306.2121400 | 1306.2120440 |
| 0.0000960  | -0.0003000 | 0.0000000 |    |   |    |    |    |   |              |              |
| 5019:      | 62         | 15        | 47 | 1 | 63 | 15 | 48 | 0 | 1306.4799600 | 1306.4798142 |
| 0.0001458  | -0.0003000 | 0.0000000 |    |   |    |    |    |   |              |              |
| 5020:      | 61         | 15        | 46 | 1 | 62 | 15 | 47 | 0 | 1306.7474300 | 1306.7475546 |
| -0.0001246 | -0.0003000 | 0.0000000 |    |   |    |    |    |   |              |              |
| 5021:      | 60         | 15        | 45 | 1 | 61 | 15 | 46 | 0 | 1307.0152000 | 1307.0152635 |
| -0.0000635 | -0.0003000 | 0.0000000 |    |   |    |    |    |   |              |              |
| 5022:      | 59         | 15        | 44 | 1 | 60 | 15 | 45 | 0 | 1307.2832700 | 1307.2829392 |
| 0.0003308  | -0.0003000 | 0.0000000 |    |   |    |    |    |   |              |              |
| 5023:      | 58         | 15        | 43 | 1 | 59 | 15 | 44 | 0 | 1307.5510500 | 1307.5505798 |
| 0.0004702  | -0.0003000 | 0.0000000 |    |   |    |    |    |   |              |              |
| 5024:      | 57         | 15        | 42 | 1 | 58 | 15 | 43 | 0 | 1307.8181500 | 1307.8181837 |
| -0.0000337 | -0.0003000 | 0.0000000 |    |   |    |    |    |   |              |              |
| 5025:      | 56         | 15        | 41 | 1 | 57 | 15 | 42 | 0 | 1308.0853800 | 1308.0857490 |
| -0.0003690 | -0.0003000 | 0.0000000 |    |   |    |    |    |   |              |              |
| 5026:      | 55         | 15        | 40 | 1 | 56 | 15 | 41 | 0 | 1308.3533300 | 1308.3532740 |
| 0.0000560  | -0.0003000 | 0.0000000 |    |   |    |    |    |   |              |              |
| 5027:      | 54         | 15        | 39 | 1 | 55 | 15 | 40 | 0 | 1308.6206700 | 1308.6207570 |
| -0.0000870 | -0.0003000 | 0.0000000 |    |   |    |    |    |   |              |              |
| 5028:      | 53         | 15        | 38 | 1 | 54 | 15 | 39 | 0 | 1308.8884600 | 1308.8881961 |
| 0.0002639  | -0.0003000 | 0.0000000 |    |   |    |    |    |   |              |              |
| 5029:      | 52         | 15        | 37 | 1 | 53 | 15 | 38 | 0 | 1309.1557700 | 1309.1555897 |
| 0.0001803  | -0.0003000 | 0.0000000 |    |   |    |    |    |   |              |              |
| 5030:      | 51         | 15        | 36 | 1 | 52 | 15 | 37 | 0 | 1309.4231800 | 1309.4229360 |
| 0.0002440  | -0.0003000 | 0.0000000 |    |   |    |    |    |   |              |              |
| 5031:      | 50         | 15        | 35 | 1 | 51 | 15 | 36 | 0 | 1309.6901900 | 1309.6902333 |
| -0.0000433 | -0.0003000 | 0.0000000 |    |   |    |    |    |   |              |              |
| 5032:      | 49         | 15        | 34 | 1 | 50 | 15 | 35 | 0 | 1309.9576200 | 1309.9574797 |
| 0.0001403  | -0.0003000 | 0.0000000 |    |   |    |    |    |   |              |              |
| 5033:      | 48         | 15        | 33 | 1 | 49 | 15 | 34 | 0 | 1310.2249600 | 1310.2246736 |
| 0.0002864  | -0.0003000 | 0.0000000 |    |   |    |    |    |   |              |              |
| 5034:      | 47         | 15        | 32 | 1 | 48 | 15 | 33 | 0 | 1310.4919200 | 1310.4918132 |
| 0.0001068  | -0.0003000 | 0.0000000 |    |   |    |    |    |   |              |              |
| 5035:      | 46         | 15        | 31 | 1 | 47 | 15 | 32 | 0 | 1310.7588500 | 1310.7588968 |

|            |            |           |              |              |
|------------|------------|-----------|--------------|--------------|
| -0.0000468 | -0.0003000 | 0.0000000 |              |              |
| 5036:      | 45         | 15        | 30           | 1 46 15 31 0 |
| 0.0000874  | -0.0003000 | 0.0000000 | 1311.0260100 | 1311.0259226 |
| 5037:      | 44         | 15        | 29           | 1 45 15 30 0 |
| -0.0001088 | -0.0003000 | 0.0000000 | 1311.2927800 | 1311.2928888 |
| 5038:      | 43         | 15        | 28           | 1 44 15 29 0 |
| -0.0002438 | -0.0003000 | 0.0000000 | 1311.5595500 | 1311.5597938 |
| 5039:      | 42         | 15        | 27           | 1 43 15 28 0 |
| -0.0002058 | -0.0003000 | 0.0000000 | 1311.8264300 | 1311.8266358 |
| 5040:      | 41         | 15        | 26           | 1 42 15 27 0 |
| -0.0004931 | -0.0003000 | 0.0000000 | 1312.0929200 | 1312.0934131 |
| 5041:      | 40         | 15        | 25           | 1 41 15 26 0 |
| -0.0002338 | -0.0003000 | 0.0000000 | 1312.3598900 | 1312.3601238 |
| 5042:      | 39         | 15        | 24           | 1 40 15 25 0 |
| 0.0001336  | -0.0003000 | 0.0000000 | 1312.6269000 | 1312.6267664 |
| 5043:      | 38         | 15        | 23           | 1 39 15 24 0 |
| -0.0000990 | -0.0003000 | 0.0000000 | 1312.8932400 | 1312.8933390 |
| 5044:      | 37         | 15        | 22           | 1 38 15 23 0 |
| 0.0001400  | -0.0003000 | 0.0000000 | 1313.1599800 | 1313.1598400 |
| 5045:      | 36         | 15        | 21           | 1 37 15 22 0 |
| -0.0000476 | -0.0003000 | 0.0000000 | 1313.4262200 | 1313.4262676 |
| 5046:      | 35         | 15        | 20           | 1 36 15 21 0 |
| 0.0000899  | -0.0003000 | 0.0000000 | 1313.6927100 | 1313.6926201 |
| 5047:      | 34         | 15        | 19           | 1 35 15 20 0 |
| 0.0001143  | -0.0003000 | 0.0000000 | 1313.9590100 | 1313.9588957 |
| 5048:      | 33         | 15        | 18           | 1 34 15 19 0 |
| 0.0001272  | -0.0003000 | 0.0000000 | 1314.2252200 | 1314.2250928 |
| 5049:      | 32         | 15        | 17           | 1 33 15 18 0 |
| 0.0000704  | -0.0003000 | 0.0000000 | 1314.4912800 | 1314.4912096 |
| 5050:      | 31         | 15        | 16           | 1 32 15 17 0 |
| 0.0001956  | -0.0003000 | 0.0000000 | 1314.7574400 | 1314.7572444 |
| 5051:      | 30         | 15        | 15           | 1 31 15 16 0 |
| -0.0003555 | -0.0003000 | 0.0000000 | 1315.0228400 | 1315.0231955 |
| 5052:      | 29         | 15        | 14           | 1 30 15 15 0 |
| 0.0000888  | -0.0003000 | 0.0000000 | 1315.2891500 | 1315.2890612 |
| 5053:      | 28         | 15        | 13           | 1 29 15 14 0 |
| 0.0000202  | -0.0003000 | 0.0000000 | 1315.5548600 | 1315.5548398 |
| 5054:      | 27         | 15        | 12           | 1 28 15 13 0 |
| -0.0001196 | -0.0003000 | 0.0000000 | 1315.8204100 | 1315.8205296 |
| 5055:      | 26         | 15        | 11           | 1 27 15 12 0 |
| 0.0001112  | -0.0003000 | 0.0000000 | 1316.0862400 | 1316.0861288 |
| 5056:      | 25         | 15        | 10           | 1 26 15 11 0 |
| -0.0002457 | -0.0003000 | 0.0000000 | 1316.3513900 | 1316.3516357 |
| 5057:      | 24         | 15        | 9            | 1 25 15 10 0 |
| -0.0003688 | -0.0003000 | 0.0000000 | 1316.6166800 | 1316.6170488 |
| 5058:      | 23         | 15        | 8            | 1 24 15 9 0  |
| -0.0002061 | -0.0003000 | 0.0000000 | 1316.8821600 | 1316.8823661 |
| 5059:      | 22         | 15        | 7            | 1 23 15 8 0  |
| -0.0000162 | -0.0003000 | 0.0000000 | 1317.1475700 | 1317.1475862 |
| 5060:      | 21         | 15        | 6            | 1 22 15 7 0  |
| -0.0003072 | -0.0003000 | 0.0000000 | 1317.4124000 | 1317.4127072 |
| 5061:      | 19         | 15        | 4            | 1 20 15 5 0  |
| 0.0002646  | -0.0003000 | 0.0000000 | 1317.9429100 | 1317.9426454 |
| 5062:      | 18         | 15        | 3            | 1 19 15 4 0  |
| -0.0001492 | -0.0003000 | 0.0000000 | 1318.2073100 | 1318.2074592 |
| 5063:      | 17         | 15        | 2            | 1 18 15 3 0  |
| 0.0001828  | -0.0003000 | 0.0000000 | 1318.4723500 | 1318.4721672 |
| 5064:      | 18         | 15        | 3            | 1 17 15 2 0  |
| -0.0003583 | -0.0003000 | 0.0000000 | 1327.9167600 | 1327.9171183 |
| 5065:      | 19         | 15        | 4            | 1 18 15 3 0  |
| 0.0001691  | -0.0003000 | 0.0000000 | 1328.1769100 | 1328.1767409 |
| 5066:      | 20         | 15        | 5            | 1 19 15 4 0  |
| 0.0000255  | -0.0003000 | 0.0000000 | 1328.4362200 | 1328.4361945 |
| 5067:      | 21         | 15        | 6            | 1 20 15 5 0  |
| 0.0001924  | -0.0003000 | 0.0000000 | 1328.6956700 | 1328.6954776 |

|       |            |            |           |   |    |    |    |   |              |              |
|-------|------------|------------|-----------|---|----|----|----|---|--------------|--------------|
| 5068: | 23         | 15         | 8         | 1 | 22 | 15 | 7  | 0 | 1329.2136200 | 1329.2135252 |
|       | 0.0000948  | -0.0003000 | 0.0000000 |   |    |    |    |   |              |              |
| 5069: | 24         | 15         | 9         | 1 | 23 | 15 | 8  | 0 | 1329.4727300 | 1329.4722864 |
|       | 0.0004436  | -0.0003000 | 0.0000000 |   |    |    |    |   |              |              |
| 5070: | 25         | 15         | 10        | 1 | 24 | 15 | 9  | 0 | 1329.7313500 | 1329.7308703 |
|       | 0.0004797  | -0.0003000 | 0.0000000 |   |    |    |    |   |              |              |
| 5071: | 27         | 15         | 12        | 1 | 26 | 15 | 11 | 0 | 1330.2475300 | 1330.2474997 |
|       | 0.0000303  | -0.0003000 | 0.0000000 |   |    |    |    |   |              |              |
| 5072: | 28         | 15         | 13        | 1 | 27 | 15 | 12 | 0 | 1330.5054400 | 1330.5055417 |
|       | -0.0001017 | -0.0003000 | 0.0000000 |   |    |    |    |   |              |              |
| 5073: | 29         | 15         | 14        | 1 | 28 | 15 | 13 | 0 | 1330.7633600 | 1330.7633997 |
|       | -0.0000397 | -0.0003000 | 0.0000000 |   |    |    |    |   |              |              |
| 5074: | 30         | 15         | 15        | 1 | 29 | 15 | 14 | 0 | 1331.0211000 | 1331.0210721 |
|       | 0.0000279  | -0.0003000 | 0.0000000 |   |    |    |    |   |              |              |
| 5075: | 31         | 15         | 16        | 1 | 30 | 15 | 15 | 0 | 1331.2782300 | 1331.2785571 |
|       | -0.0003271 | -0.0003000 | 0.0000000 |   |    |    |    |   |              |              |
| 5076: | 32         | 15         | 17        | 1 | 31 | 15 | 16 | 0 | 1331.5357000 | 1331.5358530 |
|       | -0.0001530 | -0.0003000 | 0.0000000 |   |    |    |    |   |              |              |
| 5077: | 33         | 15         | 18        | 1 | 32 | 15 | 17 | 0 | 1331.7929600 | 1331.7929581 |
|       | 0.0000019  | -0.0003000 | 0.0000000 |   |    |    |    |   |              |              |
| 5078: | 34         | 15         | 19        | 1 | 33 | 15 | 18 | 0 | 1332.0498400 | 1332.0498708 |
|       | -0.0000308 | -0.0003000 | 0.0000000 |   |    |    |    |   |              |              |
| 5079: | 35         | 15         | 20        | 1 | 34 | 15 | 19 | 0 | 1332.3066500 | 1332.3065893 |
|       | 0.0000607  | -0.0003000 | 0.0000000 |   |    |    |    |   |              |              |
| 5080: | 36         | 15         | 21        | 1 | 35 | 15 | 20 | 0 | 1332.5632300 | 1332.5631120 |
|       | 0.0001180  | -0.0003000 | 0.0000000 |   |    |    |    |   |              |              |
| 5081: | 37         | 15         | 22        | 1 | 36 | 15 | 21 | 0 | 1332.8193500 | 1332.8194370 |
|       | -0.0000870 | -0.0003000 | 0.0000000 |   |    |    |    |   |              |              |
| 5082: | 38         | 15         | 23        | 1 | 37 | 15 | 22 | 0 | 1333.0753900 | 1333.0755628 |
|       | -0.0001728 | -0.0003000 | 0.0000000 |   |    |    |    |   |              |              |
| 5083: | 39         | 15         | 24        | 1 | 38 | 15 | 23 | 0 | 1333.3312700 | 1333.3314875 |
|       | -0.0002175 | -0.0003000 | 0.0000000 |   |    |    |    |   |              |              |
| 5084: | 40         | 15         | 25        | 1 | 39 | 15 | 24 | 0 | 1333.5870600 | 1333.5872095 |
|       | -0.0001495 | -0.0003000 | 0.0000000 |   |    |    |    |   |              |              |
| 5085: | 41         | 15         | 26        | 1 | 40 | 15 | 25 | 0 | 1333.8427400 | 1333.8427270 |
|       | 0.0000130  | -0.0003000 | 0.0000000 |   |    |    |    |   |              |              |
| 5086: | 42         | 15         | 27        | 1 | 41 | 15 | 26 | 0 | 1334.0983200 | 1334.0980383 |
|       | 0.0002817  | -0.0003000 | 0.0000000 |   |    |    |    |   |              |              |
| 5087: | 44         | 15         | 29        | 1 | 43 | 15 | 28 | 0 | 1334.6078800 | 1334.6080353 |
|       | -0.0001553 | -0.0003000 | 0.0000000 |   |    |    |    |   |              |              |
| 5088: | 45         | 15         | 30        | 1 | 44 | 15 | 29 | 0 | 1334.8623500 | 1334.8627175 |
|       | -0.0003675 | -0.0003000 | 0.0000000 |   |    |    |    |   |              |              |
| 5089: | 46         | 15         | 31        | 1 | 45 | 15 | 30 | 0 | 1335.1170900 | 1335.1171865 |
|       | -0.0000965 | -0.0003000 | 0.0000000 |   |    |    |    |   |              |              |
| 5090: | 47         | 15         | 32        | 1 | 46 | 15 | 31 | 0 | 1335.3716100 | 1335.3714405 |
|       | 0.0001695  | -0.0003000 | 0.0000000 |   |    |    |    |   |              |              |
| 5091: | 48         | 15         | 33        | 1 | 47 | 15 | 32 | 0 | 1335.6255500 | 1335.6254778 |
|       | 0.0000722  | -0.0003000 | 0.0000000 |   |    |    |    |   |              |              |
| 5092: | 49         | 15         | 34        | 1 | 48 | 15 | 33 | 0 | 1335.8792900 | 1335.8792965 |
|       | -0.0000065 | -0.0003000 | 0.0000000 |   |    |    |    |   |              |              |
| 5093: | 53         | 15         | 38        | 1 | 52 | 15 | 37 | 0 | 1336.8922300 | 1336.8923505 |
|       | -0.0001205 | -0.0003000 | 0.0000000 |   |    |    |    |   |              |              |
| 5094: | 54         | 15         | 39        | 1 | 53 | 15 | 38 | 0 | 1337.1449500 | 1337.1450497 |
|       | -0.0000997 | -0.0003000 | 0.0000000 |   |    |    |    |   |              |              |
| 5095: | 57         | 15         | 42        | 1 | 56 | 15 | 41 | 0 | 1337.9019400 | 1337.9017641 |
|       | 0.0001759  | -0.0003000 | 0.0000000 |   |    |    |    |   |              |              |
| 5096: | 58         | 15         | 43        | 1 | 57 | 15 | 42 | 0 | 1338.1534800 | 1338.1535351 |
|       | -0.0000551 | -0.0003000 | 0.0000000 |   |    |    |    |   |              |              |
| 5097: | 59         | 15         | 44        | 1 | 58 | 15 | 43 | 0 | 1338.4050300 | 1338.4050693 |
|       | -0.0000393 | -0.0003000 | 0.0000000 |   |    |    |    |   |              |              |
| 5098: | 60         | 15         | 45        | 1 | 59 | 15 | 44 | 0 | 1338.6563500 | 1338.6563651 |
|       | -0.0000151 | -0.0003000 | 0.0000000 |   |    |    |    |   |              |              |
| 5099: | 61         | 15         | 46        | 1 | 60 | 15 | 45 | 0 | 1338.9073600 | 1338.9074204 |
|       | -0.0000604 | -0.0003000 | 0.0000000 |   |    |    |    |   |              |              |
| 5100: | 62         | 15         | 47        | 1 | 61 | 15 | 46 | 0 | 1339.1582000 | 1339.1582334 |

|            |            |            |   |                           |
|------------|------------|------------|---|---------------------------|
| -0.0000334 | -0.0003000 | 0.0000000  |   |                           |
| 5101: 64   | 15 49      | 1 63 15 48 | 0 | 1339.6593400 1339.6591251 |
| 0.0002149  | -0.0003000 | 0.0000000  |   |                           |
| 5102: 65   | 15 50      | 1 64 15 49 | 0 | 1339.9094900 1339.9092000 |
| 0.0002900  | -0.0003000 | 0.0000000  |   |                           |
| 5103: 66   | 15 51      | 1 65 15 50 | 0 | 1340.1592000 1340.1590250 |
| 0.0001750  | -0.0003000 | 0.0000000  |   |                           |
| 5104: 67   | 15 52      | 1 66 15 51 | 0 | 1340.4086200 1340.4085982 |
| 0.0000218  | -0.0003000 | 0.0000000  |   |                           |
| 5105: 68   | 15 53      | 1 67 15 52 | 0 | 1340.6577100 1340.6579177 |
| -0.0002077 | -0.0003000 | 0.0000000  |   |                           |
| 5106: 69   | 15 54      | 1 68 15 53 | 0 | 1340.9068300 1340.9069815 |
| -0.0001515 | -0.0003000 | 0.0000000  |   |                           |
| 5107: 70   | 15 55      | 1 69 15 54 | 0 | 1341.1557500 1341.1557877 |
| -0.0000377 | -0.0003000 | 0.0000000  |   |                           |
| 5108: 71   | 15 56      | 1 70 15 55 | 0 | 1341.4046200 1341.4043343 |
| 0.0002857  | -0.0003000 | 0.0000000  |   |                           |
| 5109: 72   | 15 57      | 1 71 15 56 | 0 | 1341.6529800 1341.6526194 |
| 0.0003606  | -0.0003000 | 0.0000000  |   |                           |
| 5110: 73   | 15 58      | 1 72 15 57 | 0 | 1341.9007000 1341.9006409 |
| 0.0000591  | -0.0003000 | 0.0000000  |   |                           |
| 5111: 74   | 15 59      | 1 73 15 58 | 0 | 1342.1481200 1342.1483969 |
| -0.0002769 | -0.0003000 | 0.0000000  |   |                           |
| 5112: 75   | 15 60      | 1 74 15 59 | 0 | 1342.3959000 1342.3958854 |
| 0.0000146  | -0.0003000 | 0.0000000  |   |                           |
| 5113: 76   | 15 61      | 1 75 15 60 | 0 | 1342.6435300 1342.6431043 |
| 0.0004257  | -0.0003000 | 0.0000000  |   |                           |
| 5114: 77   | 15 62      | 1 76 15 61 | 0 | 1342.8904800 1342.8900517 |
| 0.0004283  | -0.0003000 | 0.0000000  |   |                           |
| 5115: 79   | 15 64      | 1 78 15 63 | 0 | 1343.3831900 1343.3831236 |
| 0.0000664  | -0.0003000 | 0.0000000  |   |                           |
| 5116: 80   | 15 65      | 1 79 15 64 | 0 | 1343.6292300 1343.6292440 |
| -0.0000140 | -0.0003000 | 0.0000000  |   |                           |
| 5117: 81   | 15 66      | 1 80 15 65 | 0 | 1343.8753800 1343.8750846 |
| 0.0002954  | -0.0003000 | 0.0000000  |   |                           |
| 5118: 82   | 15 67      | 1 81 15 66 | 0 | 1344.1213700 1344.1206434 |
| 0.0007266  | -0.0003000 | 0.0000000  |   |                           |
| 5119: 83   | 15 68      | 1 82 15 67 | 0 | 1344.3658100 1344.3659182 |
| -0.0001082 | -0.0003000 | 0.0000000  |   |                           |
| 5120: 84   | 15 69      | 1 83 15 68 | 0 | 1344.6111500 1344.6109069 |
| 0.0002431  | -0.0003000 | 0.0000000  |   |                           |
| 5121: 86   | 15 71      | 1 85 15 70 | 0 | 1345.0994800 1345.1000176 |
| -0.0005376 | -0.0003000 | 0.0000000  |   |                           |
| 5122: 87   | 15 72      | 1 86 15 71 | 0 | 1345.3439200 1345.3441353 |
| -0.0002153 | -0.0003000 | 0.0000000  |   |                           |
| 5123: 88   | 15 73      | 1 87 15 72 | 0 | 1345.5882500 1345.5879584 |
| 0.0002916  | -0.0003000 | 0.0000000  |   |                           |
| 5124: 84   | 15 70      | 1 85 15 71 | 0 | 1300.5848600 1300.5851102 |
| -0.0002502 | -0.0003000 | 0.0000000  |   |                           |
| 5125: 83   | 15 69      | 1 84 15 70 | 0 | 1300.8528100 1300.8530994 |
| -0.0002894 | -0.0003000 | 0.0000000  |   |                           |
| 5126: 82   | 15 68      | 1 83 15 69 | 0 | 1301.1214300 1301.1210956 |
| 0.0003344  | -0.0003000 | 0.0000000  |   |                           |
| 5127: 81   | 15 67      | 1 82 15 68 | 0 | 1301.3886200 1301.3890972 |
| -0.0004772 | -0.0003000 | 0.0000000  |   |                           |
| 5128: 80   | 15 66      | 1 81 15 67 | 0 | 1301.6575200 1301.6571024 |
| 0.0004176  | -0.0003000 | 0.0000000  |   |                           |
| 5129: 79   | 15 65      | 1 80 15 66 | 0 | 1301.9252700 1301.9251095 |
| 0.0001605  | -0.0003000 | 0.0000000  |   |                           |
| 5130: 78   | 15 64      | 1 79 15 65 | 0 | 1302.1936600 1302.1931166 |
| 0.0005434  | -0.0003000 | 0.0000000  |   |                           |
| 5131: 77   | 15 63      | 1 78 15 64 | 0 | 1302.4612200 1302.4611221 |
| 0.0000979  | -0.0003000 | 0.0000000  |   |                           |
| 5132: 76   | 15 62      | 1 77 15 63 | 0 | 1302.7287600 1302.7291242 |
| -0.0003642 | -0.0003000 | 0.0000000  |   |                           |

|                                 |              |              |
|---------------------------------|--------------|--------------|
| 5133: 75 15 61 1 76 15 62 0     | 1302.9970200 | 1302.9971212 |
| -0.0001012 -0.0003000 0.0000000 |              |              |
| 5134: 74 15 60 1 75 15 61 0     | 1303.2647300 | 1303.2651113 |
| -0.0003813 -0.0003000 0.0000000 |              |              |
| 5135: 73 15 59 1 74 15 60 0     | 1303.5332100 | 1303.5330927 |
| 0.0001173 -0.0003000 0.0000000  |              |              |
| 5136: 72 15 58 1 73 15 59 0     | 1303.8005500 | 1303.8010636 |
| -0.0005136 -0.0003000 0.0000000 |              |              |
| 5137: 71 15 57 1 72 15 58 0     | 1304.0690100 | 1304.0690225 |
| -0.0000125 -0.0003000 0.0000000 |              |              |
| 5138: 70 15 56 1 71 15 57 0     | 1304.3366000 | 1304.3369673 |
| -0.0003673 -0.0003000 0.0000000 |              |              |
| 5139: 69 15 55 1 70 15 56 0     | 1304.6048700 | 1304.6048966 |
| -0.0000266 -0.0003000 0.0000000 |              |              |
| 5140: 68 15 54 1 69 15 55 0     | 1304.8729600 | 1304.8728083 |
| 0.0001517 -0.0003000 0.0000000  |              |              |
| 5141: 67 15 53 1 68 15 54 0     | 1305.1405100 | 1305.1407009 |
| -0.0001909 -0.0003000 0.0000000 |              |              |
| 5142: 66 15 52 1 67 15 53 0     | 1305.4087500 | 1305.4085725 |
| 0.0001775 -0.0003000 0.0000000  |              |              |
| 5143: 64 15 50 1 65 15 51 0     | 1305.9442300 | 1305.9442458 |
| -0.0000158 -0.0003000 0.0000000 |              |              |
| 5144: 63 15 49 1 64 15 50 0     | 1306.2121400 | 1306.2120440 |
| 0.0000960 -0.0003000 0.0000000  |              |              |
| 5145: 62 15 48 1 63 15 49 0     | 1306.4799600 | 1306.4798142 |
| 0.0001458 -0.0003000 0.0000000  |              |              |
| 5146: 61 15 47 1 62 15 48 0     | 1306.7474300 | 1306.7475546 |
| -0.0001246 -0.0003000 0.0000000 |              |              |
| 5147: 60 15 46 1 61 15 47 0     | 1307.0152000 | 1307.0152635 |
| -0.0000635 -0.0003000 0.0000000 |              |              |
| 5148: 59 15 45 1 60 15 46 0     | 1307.2832700 | 1307.2829392 |
| 0.0003308 -0.0003000 0.0000000  |              |              |
| 5149: 58 15 44 1 59 15 45 0     | 1307.5510500 | 1307.5505798 |
| 0.0004702 -0.0003000 0.0000000  |              |              |
| 5150: 57 15 43 1 58 15 44 0     | 1307.8181500 | 1307.8181837 |
| -0.0000337 -0.0003000 0.0000000 |              |              |
| 5151: 56 15 42 1 57 15 43 0     | 1308.0853800 | 1308.0857490 |
| -0.0003690 -0.0003000 0.0000000 |              |              |
| 5152: 55 15 41 1 56 15 42 0     | 1308.3533300 | 1308.3532740 |
| 0.0000560 -0.0003000 0.0000000  |              |              |
| 5153: 54 15 40 1 55 15 41 0     | 1308.6206700 | 1308.6207570 |
| -0.0000870 -0.0003000 0.0000000 |              |              |
| 5154: 53 15 39 1 54 15 40 0     | 1308.8884600 | 1308.8881961 |
| 0.0002639 -0.0003000 0.0000000  |              |              |
| 5155: 52 15 38 1 53 15 39 0     | 1309.1557700 | 1309.1555897 |
| 0.0001803 -0.0003000 0.0000000  |              |              |
| 5156: 51 15 37 1 52 15 38 0     | 1309.4231800 | 1309.4229360 |
| 0.0002440 -0.0003000 0.0000000  |              |              |
| 5157: 50 15 36 1 51 15 37 0     | 1309.6901900 | 1309.6902333 |
| -0.0000433 -0.0003000 0.0000000 |              |              |
| 5158: 49 15 35 1 50 15 36 0     | 1309.9576200 | 1309.9574797 |
| 0.0001403 -0.0003000 0.0000000  |              |              |
| 5159: 48 15 34 1 49 15 35 0     | 1310.2249600 | 1310.2246736 |
| 0.0002864 -0.0003000 0.0000000  |              |              |
| 5160: 47 15 33 1 48 15 34 0     | 1310.4919200 | 1310.4918132 |
| 0.0001068 -0.0003000 0.0000000  |              |              |
| 5161: 46 15 32 1 47 15 33 0     | 1310.7588500 | 1310.7588968 |
| -0.0000468 -0.0003000 0.0000000 |              |              |
| 5162: 45 15 31 1 46 15 32 0     | 1311.0260100 | 1311.0259226 |
| 0.0000874 -0.0003000 0.0000000  |              |              |
| 5163: 44 15 30 1 45 15 31 0     | 1311.2927800 | 1311.2928888 |
| -0.0001088 -0.0003000 0.0000000 |              |              |
| 5164: 43 15 29 1 44 15 30 0     | 1311.5595500 | 1311.5597938 |
| -0.0002438 -0.0003000 0.0000000 |              |              |
| 5165: 42 15 28 1 43 15 29 0     | 1311.8264300 | 1311.8266358 |

|            |            |           |              |              |
|------------|------------|-----------|--------------|--------------|
| -0.0002058 | -0.0003000 | 0.0000000 |              |              |
| 5166:      | 41         | 15        | 27           | 1 42 15 28 0 |
| -0.0004931 | -0.0003000 | 0.0000000 | 1312.0929200 | 1312.0934131 |
| 5167:      | 40         | 15        | 26           | 1 41 15 27 0 |
| -0.0002338 | -0.0003000 | 0.0000000 | 1312.3598900 | 1312.3601238 |
| 5168:      | 39         | 15        | 25           | 1 40 15 26 0 |
| 0.0001336  | -0.0003000 | 0.0000000 | 1312.6269000 | 1312.6267664 |
| 5169:      | 38         | 15        | 24           | 1 39 15 25 0 |
| -0.0000990 | -0.0003000 | 0.0000000 | 1312.8932400 | 1312.8933390 |
| 5170:      | 37         | 15        | 23           | 1 38 15 24 0 |
| 0.0001400  | -0.0003000 | 0.0000000 | 1313.1599800 | 1313.1598400 |
| 5171:      | 36         | 15        | 22           | 1 37 15 23 0 |
| -0.0000476 | -0.0003000 | 0.0000000 | 1313.4262200 | 1313.4262676 |
| 5172:      | 35         | 15        | 21           | 1 36 15 22 0 |
| 0.0000899  | -0.0003000 | 0.0000000 | 1313.6927100 | 1313.6926201 |
| 5173:      | 34         | 15        | 20           | 1 35 15 21 0 |
| 0.0001143  | -0.0003000 | 0.0000000 | 1313.9590100 | 1313.9588957 |
| 5174:      | 33         | 15        | 19           | 1 34 15 20 0 |
| 0.0001272  | -0.0003000 | 0.0000000 | 1314.2252200 | 1314.2250928 |
| 5175:      | 32         | 15        | 18           | 1 33 15 19 0 |
| 0.0000704  | -0.0003000 | 0.0000000 | 1314.4912800 | 1314.4912096 |
| 5176:      | 31         | 15        | 17           | 1 32 15 18 0 |
| 0.0001956  | -0.0003000 | 0.0000000 | 1314.7574400 | 1314.7572444 |
| 5177:      | 30         | 15        | 16           | 1 31 15 17 0 |
| -0.0003555 | -0.0003000 | 0.0000000 | 1315.0228400 | 1315.0231955 |
| 5178:      | 29         | 15        | 15           | 1 30 15 16 0 |
| 0.0000888  | -0.0003000 | 0.0000000 | 1315.2891500 | 1315.2890612 |
| 5179:      | 28         | 15        | 14           | 1 29 15 15 0 |
| 0.0000202  | -0.0003000 | 0.0000000 | 1315.5548600 | 1315.5548398 |
| 5180:      | 27         | 15        | 13           | 1 28 15 14 0 |
| -0.0001196 | -0.0003000 | 0.0000000 | 1315.8204100 | 1315.8205296 |
| 5181:      | 26         | 15        | 12           | 1 27 15 13 0 |
| 0.0001112  | -0.0003000 | 0.0000000 | 1316.0862400 | 1316.0861288 |
| 5182:      | 25         | 15        | 11           | 1 26 15 12 0 |
| -0.0002457 | -0.0003000 | 0.0000000 | 1316.3513900 | 1316.3516357 |
| 5183:      | 24         | 15        | 10           | 1 25 15 11 0 |
| -0.0003688 | -0.0003000 | 0.0000000 | 1316.6166800 | 1316.6170488 |
| 5184:      | 23         | 15        | 9            | 1 24 15 10 0 |
| -0.0002061 | -0.0003000 | 0.0000000 | 1316.8821600 | 1316.8823661 |
| 5185:      | 22         | 15        | 8            | 1 23 15 9 0  |
| -0.0000162 | -0.0003000 | 0.0000000 | 1317.1475700 | 1317.1475862 |
| 5186:      | 21         | 15        | 7            | 1 22 15 8 0  |
| -0.0003072 | -0.0003000 | 0.0000000 | 1317.4124000 | 1317.4127072 |
| 5187:      | 19         | 15        | 5            | 1 20 15 6 0  |
| 0.0002646  | -0.0003000 | 0.0000000 | 1317.9429100 | 1317.9426454 |
| 5188:      | 18         | 15        | 4            | 1 19 15 5 0  |
| -0.0001492 | -0.0003000 | 0.0000000 | 1318.2073100 | 1318.2074592 |
| 5189:      | 17         | 15        | 3            | 1 18 15 4 0  |
| 0.0001828  | -0.0003000 | 0.0000000 | 1318.4723500 | 1318.4721672 |
| 5190:      | 18         | 15        | 4            | 1 17 15 3 0  |
| -0.0003583 | -0.0003000 | 0.0000000 | 1327.9167600 | 1327.9171183 |
| 5191:      | 19         | 15        | 5            | 1 18 15 4 0  |
| 0.0001691  | -0.0003000 | 0.0000000 | 1328.1769100 | 1328.1767409 |
| 5192:      | 20         | 15        | 6            | 1 19 15 5 0  |
| 0.0000255  | -0.0003000 | 0.0000000 | 1328.4362200 | 1328.4361945 |
| 5193:      | 21         | 15        | 7            | 1 20 15 6 0  |
| 0.0001924  | -0.0003000 | 0.0000000 | 1328.6956700 | 1328.6954776 |
| 5194:      | 23         | 15        | 9            | 1 22 15 8 0  |
| 0.0000948  | -0.0003000 | 0.0000000 | 1329.2136200 | 1329.2135252 |
| 5195:      | 24         | 15        | 10           | 1 23 15 9 0  |
| 0.0004436  | -0.0003000 | 0.0000000 | 1329.4727300 | 1329.4722864 |
| 5196:      | 25         | 15        | 11           | 1 24 15 10 0 |
| 0.0004797  | -0.0003000 | 0.0000000 | 1329.7313500 | 1329.7308703 |
| 5197:      | 27         | 15        | 13           | 1 26 15 12 0 |
| 0.0000303  | -0.0003000 | 0.0000000 | 1330.2475300 | 1330.2474997 |

|                                 |              |              |
|---------------------------------|--------------|--------------|
| 5198: 28 15 14 1 27 15 13 0     | 1330.5054400 | 1330.5055417 |
| -0.0001017 -0.0003000 0.0000000 |              |              |
| 5199: 29 15 15 1 28 15 14 0     | 1330.7633600 | 1330.7633997 |
| -0.0000397 -0.0003000 0.0000000 |              |              |
| 5200: 30 15 16 1 29 15 15 0     | 1331.0211000 | 1331.0210721 |
| 0.0000279 -0.0003000 0.0000000  |              |              |
| 5201: 31 15 17 1 30 15 16 0     | 1331.2782300 | 1331.2785571 |
| -0.0003271 -0.0003000 0.0000000 |              |              |
| 5202: 32 15 18 1 31 15 17 0     | 1331.5357000 | 1331.5358530 |
| -0.0001530 -0.0003000 0.0000000 |              |              |
| 5203: 33 15 19 1 32 15 18 0     | 1331.7929600 | 1331.7929581 |
| 0.0000019 -0.0003000 0.0000000  |              |              |
| 5204: 34 15 20 1 33 15 19 0     | 1332.0498400 | 1332.0498708 |
| -0.0000308 -0.0003000 0.0000000 |              |              |
| 5205: 35 15 21 1 34 15 20 0     | 1332.3066500 | 1332.3065893 |
| 0.0000607 -0.0003000 0.0000000  |              |              |
| 5206: 36 15 22 1 35 15 21 0     | 1332.5632300 | 1332.5631120 |
| 0.0001180 -0.0003000 0.0000000  |              |              |
| 5207: 37 15 23 1 36 15 22 0     | 1332.8193500 | 1332.8194370 |
| -0.0000870 -0.0003000 0.0000000 |              |              |
| 5208: 38 15 24 1 37 15 23 0     | 1333.0753900 | 1333.0755628 |
| -0.0001728 -0.0003000 0.0000000 |              |              |
| 5209: 39 15 25 1 38 15 24 0     | 1333.3312700 | 1333.3314875 |
| -0.0002175 -0.0003000 0.0000000 |              |              |
| 5210: 40 15 26 1 39 15 25 0     | 1333.5870600 | 1333.5872095 |
| -0.0001495 -0.0003000 0.0000000 |              |              |
| 5211: 41 15 27 1 40 15 26 0     | 1333.8427400 | 1333.8427270 |
| 0.0000130 -0.0003000 0.0000000  |              |              |
| 5212: 42 15 28 1 41 15 27 0     | 1334.0983200 | 1334.0980383 |
| 0.0002817 -0.0003000 0.0000000  |              |              |
| 5213: 44 15 30 1 43 15 29 0     | 1334.6078800 | 1334.6080353 |
| -0.0001553 -0.0003000 0.0000000 |              |              |
| 5214: 45 15 31 1 44 15 30 0     | 1334.8623500 | 1334.8627175 |
| -0.0003675 -0.0003000 0.0000000 |              |              |
| 5215: 46 15 32 1 45 15 31 0     | 1335.1170900 | 1335.1171865 |
| -0.0000965 -0.0003000 0.0000000 |              |              |
| 5216: 47 15 33 1 46 15 32 0     | 1335.3716100 | 1335.3714405 |
| 0.0001695 -0.0003000 0.0000000  |              |              |
| 5217: 48 15 34 1 47 15 33 0     | 1335.6255500 | 1335.6254778 |
| 0.0000722 -0.0003000 0.0000000  |              |              |
| 5218: 49 15 35 1 48 15 34 0     | 1335.8792900 | 1335.8792965 |
| -0.0000065 -0.0003000 0.0000000 |              |              |
| 5219: 53 15 39 1 52 15 38 0     | 1336.8922300 | 1336.8923505 |
| -0.0001205 -0.0003000 0.0000000 |              |              |
| 5220: 54 15 40 1 53 15 39 0     | 1337.1449500 | 1337.1450497 |
| -0.0000997 -0.0003000 0.0000000 |              |              |
| 5221: 57 15 43 1 56 15 42 0     | 1337.9019400 | 1337.9017641 |
| 0.0001759 -0.0003000 0.0000000  |              |              |
| 5222: 58 15 44 1 57 15 43 0     | 1338.1534800 | 1338.1535351 |
| -0.0000551 -0.0003000 0.0000000 |              |              |
| 5223: 59 15 45 1 58 15 44 0     | 1338.4050300 | 1338.4050693 |
| -0.0000393 -0.0003000 0.0000000 |              |              |
| 5224: 60 15 46 1 59 15 45 0     | 1338.6563500 | 1338.6563651 |
| -0.0000151 -0.0003000 0.0000000 |              |              |
| 5225: 61 15 47 1 60 15 46 0     | 1338.9073600 | 1338.9074204 |
| -0.0000604 -0.0003000 0.0000000 |              |              |
| 5226: 62 15 48 1 61 15 47 0     | 1339.1582000 | 1339.1582334 |
| -0.0000334 -0.0003000 0.0000000 |              |              |
| 5227: 64 15 50 1 63 15 49 0     | 1339.6593400 | 1339.6591251 |
| 0.0002149 -0.0003000 0.0000000  |              |              |
| 5228: 65 15 51 1 64 15 50 0     | 1339.9094900 | 1339.9092000 |
| 0.0002900 -0.0003000 0.0000000  |              |              |
| 5229: 66 15 52 1 65 15 51 0     | 1340.1592000 | 1340.1590250 |
| 0.0001750 -0.0003000 0.0000000  |              |              |
| 5230: 67 15 53 1 66 15 52 0     | 1340.4086200 | 1340.4085982 |

|            |            |            |   |                           |
|------------|------------|------------|---|---------------------------|
| 0.0000218  | -0.0003000 | 0.0000000  |   |                           |
| 5231: 68   | 15 54      | 1 67 15 53 | 0 | 1340.6577100 1340.6579177 |
| -0.0002077 | -0.0003000 | 0.0000000  |   |                           |
| 5232: 69   | 15 55      | 1 68 15 54 | 0 | 1340.9068300 1340.9069815 |
| -0.0001515 | -0.0003000 | 0.0000000  |   |                           |
| 5233: 70   | 15 56      | 1 69 15 55 | 0 | 1341.1557500 1341.1557877 |
| -0.0000377 | -0.0003000 | 0.0000000  |   |                           |
| 5234: 71   | 15 57      | 1 70 15 56 | 0 | 1341.4046200 1341.4043343 |
| 0.0002857  | -0.0003000 | 0.0000000  |   |                           |
| 5235: 72   | 15 58      | 1 71 15 57 | 0 | 1341.6529800 1341.6526194 |
| 0.0003606  | -0.0003000 | 0.0000000  |   |                           |
| 5236: 73   | 15 59      | 1 72 15 58 | 0 | 1341.9007000 1341.9006409 |
| 0.0000591  | -0.0003000 | 0.0000000  |   |                           |
| 5237: 74   | 15 60      | 1 73 15 59 | 0 | 1342.1481200 1342.1483969 |
| -0.0002769 | -0.0003000 | 0.0000000  |   |                           |
| 5238: 75   | 15 61      | 1 74 15 60 | 0 | 1342.3959000 1342.3958854 |
| 0.0000146  | -0.0003000 | 0.0000000  |   |                           |
| 5239: 76   | 15 62      | 1 75 15 61 | 0 | 1342.6435300 1342.6431043 |
| 0.0004257  | -0.0003000 | 0.0000000  |   |                           |
| 5240: 77   | 15 63      | 1 76 15 62 | 0 | 1342.8904800 1342.8900517 |
| 0.0004283  | -0.0003000 | 0.0000000  |   |                           |
| 5241: 79   | 15 65      | 1 78 15 64 | 0 | 1343.3831900 1343.3831236 |
| 0.0000664  | -0.0003000 | 0.0000000  |   |                           |
| 5242: 80   | 15 66      | 1 79 15 65 | 0 | 1343.6292300 1343.6292440 |
| -0.0000140 | -0.0003000 | 0.0000000  |   |                           |
| 5243: 81   | 15 67      | 1 80 15 66 | 0 | 1343.8753800 1343.8750846 |
| 0.0002954  | -0.0003000 | 0.0000000  |   |                           |
| 5244: 82   | 15 68      | 1 81 15 67 | 0 | 1344.1213700 1344.1206434 |
| 0.0007266  | -0.0003000 | 0.0000000  |   |                           |
| 5245: 83   | 15 69      | 1 82 15 68 | 0 | 1344.3658100 1344.3659182 |
| -0.0001082 | -0.0003000 | 0.0000000  |   |                           |
| 5246: 84   | 15 70      | 1 83 15 69 | 0 | 1344.6111500 1344.6109069 |
| 0.0002431  | -0.0003000 | 0.0000000  |   |                           |
| 5247: 86   | 15 72      | 1 85 15 71 | 0 | 1345.0994800 1345.1000176 |
| -0.0005376 | -0.0003000 | 0.0000000  |   |                           |
| 5248: 87   | 15 73      | 1 86 15 72 | 0 | 1345.3439200 1345.3441353 |
| -0.0002153 | -0.0003000 | 0.0000000  |   |                           |
| 5249: 88   | 15 74      | 1 87 15 73 | 0 | 1345.5882500 1345.5879584 |
| 0.0002916  | -0.0003000 | 0.0000000  |   |                           |
| 5250: 84   | 16 68      | 1 85 16 69 | 0 | 1300.2627200 1300.2631256 |
| -0.0004056 | -0.0003000 | 0.0000000  |   |                           |
| 5251: 83   | 16 67      | 1 84 16 68 | 0 | 1300.5314800 1300.5310762 |
| 0.0004038  | -0.0003000 | 0.0000000  |   |                           |
| 5252: 82   | 16 66      | 1 83 16 67 | 0 | 1300.7983700 1300.7990345 |
| -0.0006645 | -0.0003000 | 0.0000000  |   |                           |
| 5253: 81   | 16 65      | 1 82 16 66 | 0 | 1301.0665700 1301.0669988 |
| -0.0004288 | -0.0003000 | 0.0000000  |   |                           |
| 5254: 80   | 16 64      | 1 81 16 65 | 0 | 1301.3356200 1301.3349675 |
| 0.0006525  | -0.0003000 | 0.0000000  |   |                           |
| 5255: 79   | 16 63      | 1 80 16 64 | 0 | 1301.6029900 1301.6029388 |
| 0.0000512  | -0.0003000 | 0.0000000  |   |                           |
| 5256: 78   | 16 62      | 1 79 16 63 | 0 | 1301.8704300 1301.8709110 |
| -0.0004810 | -0.0003000 | 0.0000000  |   |                           |
| 5257: 77   | 16 61      | 1 78 16 62 | 0 | 1302.1394900 1302.1388824 |
| 0.0006076  | -0.0003000 | 0.0000000  |   |                           |
| 5258: 73   | 16 57      | 1 74 16 58 | 0 | 1303.2108000 1303.2107262 |
| 0.0000738  | -0.0003000 | 0.0000000  |   |                           |
| 5259: 72   | 16 56      | 1 73 16 57 | 0 | 1303.4790200 1303.4786681 |
| 0.0003519  | -0.0003000 | 0.0000000  |   |                           |
| 5260: 71   | 16 55      | 1 72 16 56 | 0 | 1303.7459700 1303.7465989 |
| -0.0006289 | -0.0003000 | 0.0000000  |   |                           |
| 5261: 70   | 16 54      | 1 71 16 55 | 0 | 1304.0144600 1304.0145169 |
| -0.0000569 | -0.0003000 | 0.0000000  |   |                           |
| 5262: 69   | 16 53      | 1 70 16 54 | 0 | 1304.2823900 1304.2824203 |
| -0.0000303 | -0.0003000 | 0.0000000  |   |                           |

|            |            |           |    |   |    |    |    |   |              |              |
|------------|------------|-----------|----|---|----|----|----|---|--------------|--------------|
| 5263:      | 67         | 16        | 51 | 1 | 68 | 16 | 52 | 0 | 1304.8175100 | 1304.8181768 |
| -0.0006668 | -0.0003000 | 0.0000000 |    |   |    |    |    |   |              |              |
| 5264:      | 66         | 16        | 50 | 1 | 67 | 16 | 51 | 0 | 1305.0860200 | 1305.0860264 |
| -0.0000064 | -0.0003000 | 0.0000000 |    |   |    |    |    |   |              |              |
| 5265:      | 65         | 16        | 49 | 1 | 66 | 16 | 50 | 0 | 1305.3543800 | 1305.3538545 |
| 0.0005255  | -0.0003000 | 0.0000000 |    |   |    |    |    |   |              |              |
| 5266:      | 64         | 16        | 48 | 1 | 65 | 16 | 49 | 0 | 1305.6213600 | 1305.6216595 |
| -0.0002995 | -0.0003000 | 0.0000000 |    |   |    |    |    |   |              |              |
| 5267:      | 63         | 16        | 47 | 1 | 64 | 16 | 48 | 0 | 1305.8894900 | 1305.8894396 |
| 0.0000504  | -0.0003000 | 0.0000000 |    |   |    |    |    |   |              |              |
| 5268:      | 62         | 16        | 46 | 1 | 63 | 16 | 47 | 0 | 1306.1572500 | 1306.1571931 |
| 0.0000569  | -0.0003000 | 0.0000000 |    |   |    |    |    |   |              |              |
| 5269:      | 61         | 16        | 45 | 1 | 62 | 16 | 46 | 0 | 1306.4251900 | 1306.4249182 |
| 0.0002718  | -0.0003000 | 0.0000000 |    |   |    |    |    |   |              |              |
| 5270:      | 60         | 16        | 44 | 1 | 61 | 16 | 45 | 0 | 1306.6928200 | 1306.6926132 |
| 0.0002068  | -0.0003000 | 0.0000000 |    |   |    |    |    |   |              |              |
| 5271:      | 59         | 16        | 43 | 1 | 60 | 16 | 44 | 0 | 1306.9604300 | 1306.9602765 |
| 0.0001535  | -0.0003000 | 0.0000000 |    |   |    |    |    |   |              |              |
| 5272:      | 58         | 16        | 42 | 1 | 59 | 16 | 43 | 0 | 1307.2282700 | 1307.2279061 |
| 0.0003639  | -0.0003000 | 0.0000000 |    |   |    |    |    |   |              |              |
| 5273:      | 57         | 16        | 41 | 1 | 58 | 16 | 42 | 0 | 1307.4957000 | 1307.4955005 |
| 0.0001995  | -0.0003000 | 0.0000000 |    |   |    |    |    |   |              |              |
| 5274:      | 56         | 16        | 40 | 1 | 57 | 16 | 41 | 0 | 1307.7631400 | 1307.7630578 |
| 0.0000822  | -0.0003000 | 0.0000000 |    |   |    |    |    |   |              |              |
| 5275:      | 55         | 16        | 39 | 1 | 56 | 16 | 40 | 0 | 1308.0302400 | 1308.0305763 |
| -0.0003363 | -0.0003000 | 0.0000000 |    |   |    |    |    |   |              |              |
| 5276:      | 54         | 16        | 38 | 1 | 55 | 16 | 39 | 0 | 1308.2979900 | 1308.2980544 |
| -0.0000644 | -0.0003000 | 0.0000000 |    |   |    |    |    |   |              |              |
| 5277:      | 53         | 16        | 37 | 1 | 54 | 16 | 38 | 0 | 1308.5656900 | 1308.5654902 |
| 0.0001998  | -0.0003000 | 0.0000000 |    |   |    |    |    |   |              |              |
| 5278:      | 52         | 16        | 36 | 1 | 53 | 16 | 37 | 0 | 1308.8333800 | 1308.8328820 |
| 0.0004980  | -0.0003000 | 0.0000000 |    |   |    |    |    |   |              |              |
| 5279:      | 49         | 16        | 33 | 1 | 50 | 16 | 34 | 0 | 1309.6347500 | 1309.6347763 |
| -0.0000263 | -0.0003000 | 0.0000000 |    |   |    |    |    |   |              |              |
| 5280:      | 48         | 16        | 32 | 1 | 49 | 16 | 33 | 0 | 1309.9018700 | 1309.9019748 |
| -0.0001048 | -0.0003000 | 0.0000000 |    |   |    |    |    |   |              |              |
| 5281:      | 47         | 16        | 31 | 1 | 48 | 16 | 32 | 0 | 1310.1691300 | 1310.1691207 |
| 0.0000093  | -0.0003000 | 0.0000000 |    |   |    |    |    |   |              |              |
| 5282:      | 46         | 16        | 30 | 1 | 47 | 16 | 31 | 0 | 1310.4362300 | 1310.4362122 |
| 0.0000178  | -0.0003000 | 0.0000000 |    |   |    |    |    |   |              |              |
| 5283:      | 45         | 16        | 29 | 1 | 46 | 16 | 30 | 0 | 1310.7033600 | 1310.7032476 |
| 0.0001124  | -0.0003000 | 0.0000000 |    |   |    |    |    |   |              |              |
| 5284:      | 44         | 16        | 28 | 1 | 45 | 16 | 29 | 0 | 1310.9700200 | 1310.9702250 |
| -0.0002050 | -0.0003000 | 0.0000000 |    |   |    |    |    |   |              |              |
| 5285:      | 43         | 16        | 27 | 1 | 44 | 16 | 28 | 0 | 1311.2369000 | 1311.2371429 |
| -0.0002429 | -0.0003000 | 0.0000000 |    |   |    |    |    |   |              |              |
| 5286:      | 42         | 16        | 26 | 1 | 43 | 16 | 27 | 0 | 1311.5040200 | 1311.5039995 |
| 0.0000205  | -0.0003000 | 0.0000000 |    |   |    |    |    |   |              |              |
| 5287:      | 41         | 16        | 25 | 1 | 42 | 16 | 26 | 0 | 1311.7707000 | 1311.7707929 |
| -0.0000929 | -0.0003000 | 0.0000000 |    |   |    |    |    |   |              |              |
| 5288:      | 40         | 16        | 24 | 1 | 41 | 16 | 25 | 0 | 1312.0376900 | 1312.0375216 |
| 0.0001684  | -0.0003000 | 0.0000000 |    |   |    |    |    |   |              |              |
| 5289:      | 39         | 16        | 23 | 1 | 40 | 16 | 24 | 0 | 1312.3040700 | 1312.3041837 |
| -0.0001137 | -0.0003000 | 0.0000000 |    |   |    |    |    |   |              |              |
| 5290:      | 37         | 16        | 21 | 1 | 38 | 16 | 22 | 0 | 1312.8376800 | 1312.8373015 |
| 0.0003785  | -0.0003000 | 0.0000000 |    |   |    |    |    |   |              |              |
| 5291:      | 36         | 16        | 20 | 1 | 37 | 16 | 21 | 0 | 1313.1036100 | 1313.1037536 |
| -0.0001436 | -0.0003000 | 0.0000000 |    |   |    |    |    |   |              |              |
| 5292:      | 35         | 16        | 19 | 1 | 36 | 16 | 20 | 0 | 1313.3700900 | 1313.3701323 |
| -0.0000423 | -0.0003000 | 0.0000000 |    |   |    |    |    |   |              |              |
| 5293:      | 34         | 16        | 18 | 1 | 35 | 16 | 19 | 0 | 1313.6361700 | 1313.6364358 |
| -0.0002658 | -0.0003000 | 0.0000000 |    |   |    |    |    |   |              |              |
| 5294:      | 33         | 16        | 17 | 1 | 34 | 16 | 18 | 0 | 1313.9022000 | 1313.9026624 |
| -0.0004624 | -0.0003000 | 0.0000000 |    |   |    |    |    |   |              |              |
| 5295:      | 32         | 16        | 16 | 1 | 33 | 16 | 17 | 0 | 1314.1690800 | 1314.1688103 |

|            |            |           |              |              |
|------------|------------|-----------|--------------|--------------|
| 0.0002697  | -0.0003000 | 0.0000000 |              |              |
| 5296:      | 31         | 16        | 15           | 1 32 16 16 0 |
| -0.0002478 | -0.0003000 | 0.0000000 | 1314.4346300 | 1314.4348778 |
| 5297:      | 30         | 16        | 14           | 1 31 16 15 0 |
| 0.0001167  | -0.0003000 | 0.0000000 | 1314.7009800 | 1314.7008633 |
| 5298:      | 29         | 16        | 13           | 1 30 16 14 0 |
| 0.0002550  | -0.0003000 | 0.0000000 | 1314.9670200 | 1314.9667650 |
| 5299:      | 28         | 16        | 12           | 1 29 16 13 0 |
| 0.0000389  | -0.0003000 | 0.0000000 | 1315.2326200 | 1315.2325811 |
| 5300:      | 27         | 16        | 11           | 1 28 16 12 0 |
| -0.0001999 | -0.0003000 | 0.0000000 | 1315.4981100 | 1315.4983099 |
| 5301:      | 26         | 16        | 10           | 1 27 16 11 0 |
| 0.0006102  | -0.0003000 | 0.0000000 | 1315.7645600 | 1315.7639498 |
| 5302:      | 25         | 16        | 9            | 1 26 16 10 0 |
| 0.0002311  | -0.0003000 | 0.0000000 | 1316.0297300 | 1316.0294989 |
| 5303:      | 23         | 16        | 7            | 1 24 16 8 0  |
| 0.0004118  | -0.0003000 | 0.0000000 | 1316.5607300 | 1316.5603182 |
| 5304:      | 22         | 16        | 6            | 1 23 16 7 0  |
| -0.0000450 | -0.0003000 | 0.0000000 | 1316.8255400 | 1316.8255850 |
| 5305:      | 21         | 16        | 5            | 1 22 16 6 0  |
| 0.0003659  | -0.0003000 | 0.0000000 | 1317.0911200 | 1317.0907541 |
| 5306:      | 17         | 16        | 1            | 1 16 16 0 0  |
| -0.0001107 | -0.0003000 | 0.0000000 | 1327.3379000 | 1327.3380107 |
| 5307:      | 18         | 16        | 2            | 1 17 16 1 0  |
| 0.0001051  | -0.0003000 | 0.0000000 | 1327.5979800 | 1327.5978749 |
| 5308:      | 19         | 16        | 3            | 1 18 16 2 0  |
| -0.0000413 | -0.0003000 | 0.0000000 | 1327.8575300 | 1327.8575713 |
| 5309:      | 22         | 16        | 6            | 1 21 16 5 0  |
| -0.0001868 | -0.0003000 | 0.0000000 | 1328.6354500 | 1328.6356368 |
| 5310:      | 23         | 16        | 7            | 1 22 16 6 0  |
| -0.0000250 | -0.0003000 | 0.0000000 | 1328.8946200 | 1328.8946450 |
| 5311:      | 24         | 16        | 8            | 1 23 16 7 0  |
| 0.0000533  | -0.0003000 | 0.0000000 | 1329.1535300 | 1329.1534767 |
| 5312:      | 25         | 16        | 9            | 1 24 16 8 0  |
| 0.0003596  | -0.0003000 | 0.0000000 | 1329.4124900 | 1329.4121304 |
| 5313:      | 26         | 16        | 10           | 1 25 16 9 0  |
| 0.0006159  | -0.0003000 | 0.0000000 | 1329.6712200 | 1329.6706041 |
| 5314:      | 27         | 16        | 11           | 1 26 16 10 0 |
| -0.0002262 | -0.0003000 | 0.0000000 | 1329.9286700 | 1329.9288962 |
| 5315:      | 28         | 16        | 12           | 1 27 16 11 0 |
| 0.0002751  | -0.0003000 | 0.0000000 | 1330.1872800 | 1330.1870049 |
| 5316:      | 29         | 16        | 13           | 1 28 16 12 0 |
| 0.0003115  | -0.0003000 | 0.0000000 | 1330.4452400 | 1330.4449285 |
| 5317:      | 31         | 16        | 15           | 1 30 16 14 0 |
| -0.0001031 | -0.0003000 | 0.0000000 | 1330.9601100 | 1330.9602131 |
| 5318:      | 32         | 16        | 16           | 1 31 16 15 0 |
| -0.0001207 | -0.0003000 | 0.0000000 | 1331.2174500 | 1331.2175707 |
| 5319:      | 33         | 16        | 17           | 1 32 16 16 0 |
| 0.0005640  | -0.0003000 | 0.0000000 | 1331.4753000 | 1331.4747360 |
| 5320:      | 34         | 16        | 18           | 1 33 16 17 0 |
| 0.0003026  | -0.0003000 | 0.0000000 | 1331.7320100 | 1331.7317074 |
| 5321:      | 35         | 16        | 19           | 1 34 16 18 0 |
| 0.0001469  | -0.0003000 | 0.0000000 | 1331.9886300 | 1331.9884831 |
| 5322:      | 36         | 16        | 20           | 1 35 16 19 0 |
| 0.0004788  | -0.0003000 | 0.0000000 | 1332.2455400 | 1332.2450612 |
| 5323:      | 37         | 16        | 21           | 1 36 16 20 0 |
| -0.0001399 | -0.0003000 | 0.0000000 | 1332.5013000 | 1332.5014399 |
| 5324:      | 38         | 16        | 22           | 1 37 16 21 0 |
| -0.0004276 | -0.0003000 | 0.0000000 | 1332.7571900 | 1332.7576176 |
| 5325:      | 39         | 16        | 23           | 1 38 16 22 0 |
| 0.0000077  | -0.0003000 | 0.0000000 | 1333.0136000 | 1333.0135923 |
| 5326:      | 40         | 16        | 24           | 1 39 16 23 0 |
| 0.0001277  | -0.0003000 | 0.0000000 | 1333.2694900 | 1333.2693623 |
| 5327:      | 41         | 16        | 25           | 1 40 16 24 0 |
| -0.0000358 | -0.0003000 | 0.0000000 | 1333.5248900 | 1333.5249258 |

|       |            |            |           |   |    |    |    |   |              |              |
|-------|------------|------------|-----------|---|----|----|----|---|--------------|--------------|
| 5328: | 42         | 16         | 26        | 1 | 41 | 16 | 25 | 0 | 1333.7803500 | 1333.7802809 |
|       | 0.0000691  | -0.0003000 | 0.0000000 |   |    |    |    |   |              |              |
| 5329: | 43         | 16         | 27        | 1 | 42 | 16 | 26 | 0 | 1334.0356300 | 1334.0354259 |
|       | 0.0002041  | -0.0003000 | 0.0000000 |   |    |    |    |   |              |              |
| 5330: | 44         | 16         | 28        | 1 | 43 | 16 | 27 | 0 | 1334.2902800 | 1334.2903589 |
|       | -0.0000789 | -0.0003000 | 0.0000000 |   |    |    |    |   |              |              |
| 5331: | 45         | 16         | 29        | 1 | 44 | 16 | 28 | 0 | 1334.5447300 | 1334.5450780 |
|       | -0.0003480 | -0.0003000 | 0.0000000 |   |    |    |    |   |              |              |
| 5332: | 46         | 16         | 30        | 1 | 45 | 16 | 29 | 0 | 1334.7998700 | 1334.7995815 |
|       | 0.0002885  | -0.0003000 | 0.0000000 |   |    |    |    |   |              |              |
| 5333: | 47         | 16         | 31        | 1 | 46 | 16 | 30 | 0 | 1335.0537600 | 1335.0538675 |
|       | -0.0001075 | -0.0003000 | 0.0000000 |   |    |    |    |   |              |              |
| 5334: | 48         | 16         | 32        | 1 | 47 | 16 | 31 | 0 | 1335.3080100 | 1335.3079341 |
|       | 0.0000759  | -0.0003000 | 0.0000000 |   |    |    |    |   |              |              |
| 5335: | 49         | 16         | 33        | 1 | 48 | 16 | 32 | 0 | 1335.5617900 | 1335.5617795 |
|       | 0.0000105  | -0.0003000 | 0.0000000 |   |    |    |    |   |              |              |
| 5336: | 50         | 16         | 34        | 1 | 49 | 16 | 33 | 0 | 1335.8152400 | 1335.8154019 |
|       | -0.0001619 | -0.0003000 | 0.0000000 |   |    |    |    |   |              |              |
| 5337: | 51         | 16         | 35        | 1 | 50 | 16 | 34 | 0 | 1336.0684900 | 1336.0687993 |
|       | -0.0003093 | -0.0003000 | 0.0000000 |   |    |    |    |   |              |              |
| 5338: | 53         | 16         | 37        | 1 | 52 | 16 | 36 | 0 | 1336.5750500 | 1336.5749117 |
|       | 0.0001383  | -0.0003000 | 0.0000000 |   |    |    |    |   |              |              |
| 5339: | 54         | 16         | 38        | 1 | 53 | 16 | 37 | 0 | 1336.8274300 | 1336.8276230 |
|       | -0.0001930 | -0.0003000 | 0.0000000 |   |    |    |    |   |              |              |
| 5340: | 55         | 16         | 39        | 1 | 54 | 16 | 38 | 0 | 1337.0801600 | 1337.0801017 |
|       | 0.0000583  | -0.0003000 | 0.0000000 |   |    |    |    |   |              |              |
| 5341: | 56         | 16         | 40        | 1 | 55 | 16 | 39 | 0 | 1337.3324600 | 1337.3323461 |
|       | 0.0001139  | -0.0003000 | 0.0000000 |   |    |    |    |   |              |              |
| 5342: | 57         | 16         | 41        | 1 | 56 | 16 | 40 | 0 | 1337.5845400 | 1337.5843541 |
|       | 0.0001859  | -0.0003000 | 0.0000000 |   |    |    |    |   |              |              |
| 5343: | 58         | 16         | 42        | 1 | 57 | 16 | 41 | 0 | 1337.8361500 | 1337.8361238 |
|       | 0.0000262  | -0.0003000 | 0.0000000 |   |    |    |    |   |              |              |
| 5344: | 59         | 16         | 43        | 1 | 58 | 16 | 42 | 0 | 1338.0879000 | 1338.0876534 |
|       | 0.0002466  | -0.0003000 | 0.0000000 |   |    |    |    |   |              |              |
| 5345: | 60         | 16         | 44        | 1 | 59 | 16 | 43 | 0 | 1338.3393200 | 1338.3389409 |
|       | 0.0003791  | -0.0003000 | 0.0000000 |   |    |    |    |   |              |              |
| 5346: | 61         | 16         | 45        | 1 | 60 | 16 | 44 | 0 | 1338.5900800 | 1338.5899843 |
|       | 0.0000957  | -0.0003000 | 0.0000000 |   |    |    |    |   |              |              |
| 5347: | 64         | 16         | 48        | 1 | 63 | 16 | 47 | 0 | 1339.3416900 | 1339.3416304 |
|       | 0.0000596  | -0.0003000 | 0.0000000 |   |    |    |    |   |              |              |
| 5348: | 65         | 16         | 49        | 1 | 64 | 16 | 48 | 0 | 1339.5917400 | 1339.5916778 |
|       | 0.0000622  | -0.0003000 | 0.0000000 |   |    |    |    |   |              |              |
| 5349: | 66         | 16         | 50        | 1 | 65 | 16 | 49 | 0 | 1339.8416100 | 1339.8414713 |
|       | 0.0001387  | -0.0003000 | 0.0000000 |   |    |    |    |   |              |              |
| 5350: | 67         | 16         | 51        | 1 | 66 | 16 | 50 | 0 | 1340.0915100 | 1340.0910088 |
|       | 0.0005012  | -0.0003000 | 0.0000000 |   |    |    |    |   |              |              |
| 5351: | 68         | 16         | 52        | 1 | 67 | 16 | 51 | 0 | 1340.3400300 | 1340.3402884 |
|       | -0.0002584 | -0.0003000 | 0.0000000 |   |    |    |    |   |              |              |
| 5352: | 69         | 16         | 53        | 1 | 68 | 16 | 52 | 0 | 1340.5894400 | 1340.5893079 |
|       | 0.0001321  | -0.0003000 | 0.0000000 |   |    |    |    |   |              |              |
| 5353: | 70         | 16         | 54        | 1 | 69 | 16 | 53 | 0 | 1340.8376600 | 1340.8380654 |
|       | -0.0004054 | -0.0003000 | 0.0000000 |   |    |    |    |   |              |              |
| 5354: | 71         | 16         | 55        | 1 | 70 | 16 | 54 | 0 | 1341.0858800 | 1341.0865589 |
|       | -0.0006789 | -0.0003000 | 0.0000000 |   |    |    |    |   |              |              |
| 5355: | 72         | 16         | 56        | 1 | 71 | 16 | 55 | 0 | 1341.3349600 | 1341.3347862 |
|       | 0.0001738  | -0.0003000 | 0.0000000 |   |    |    |    |   |              |              |
| 5356: | 73         | 16         | 57        | 1 | 72 | 16 | 56 | 0 | 1341.5829400 | 1341.5827453 |
|       | 0.0001947  | -0.0003000 | 0.0000000 |   |    |    |    |   |              |              |
| 5357: | 74         | 16         | 58        | 1 | 73 | 16 | 57 | 0 | 1341.8300800 | 1341.8304341 |
|       | -0.0003541 | -0.0003000 | 0.0000000 |   |    |    |    |   |              |              |
| 5358: | 75         | 16         | 59        | 1 | 74 | 16 | 58 | 0 | 1342.0778300 | 1342.0778506 |
|       | -0.0000206 | -0.0003000 | 0.0000000 |   |    |    |    |   |              |              |
| 5359: | 76         | 16         | 60        | 1 | 75 | 16 | 59 | 0 | 1342.3246800 | 1342.3249927 |
|       | -0.0003127 | -0.0003000 | 0.0000000 |   |    |    |    |   |              |              |
| 5360: | 77         | 16         | 61        | 1 | 76 | 16 | 60 | 0 | 1342.5718500 | 1342.5718581 |

|            |            |            |   |                           |
|------------|------------|------------|---|---------------------------|
| -0.0000081 | -0.0003000 | 0.0000000  |   |                           |
| 5361: 78   | 16 62      | 1 77 16 61 | 0 | 1342.8177600 1342.8184449 |
| -0.0006849 | -0.0003000 | 0.0000000  |   |                           |
| 5362: 79   | 16 63      | 1 78 16 62 | 0 | 1343.0645200 1343.0647509 |
| -0.0002309 | -0.0003000 | 0.0000000  |   |                           |
| 5363: 80   | 16 64      | 1 79 16 63 | 0 | 1343.3102300 1343.3107739 |
| -0.0005439 | -0.0003000 | 0.0000000  |   |                           |
| 5364: 84   | 16 69      | 1 85 16 70 | 0 | 1300.2627200 1300.2631256 |
| -0.0004056 | -0.0003000 | 0.0000000  |   |                           |
| 5365: 83   | 16 68      | 1 84 16 69 | 0 | 1300.5314800 1300.5310762 |
| 0.0004038  | -0.0003000 | 0.0000000  |   |                           |
| 5366: 82   | 16 67      | 1 83 16 68 | 0 | 1300.7983700 1300.7990345 |
| -0.0006645 | -0.0003000 | 0.0000000  |   |                           |
| 5367: 81   | 16 66      | 1 82 16 67 | 0 | 1301.0665700 1301.0669988 |
| -0.0004288 | -0.0003000 | 0.0000000  |   |                           |
| 5368: 80   | 16 65      | 1 81 16 66 | 0 | 1301.3356200 1301.3349675 |
| 0.0006525  | -0.0003000 | 0.0000000  |   |                           |
| 5369: 79   | 16 64      | 1 80 16 65 | 0 | 1301.6029900 1301.6029388 |
| 0.0000512  | -0.0003000 | 0.0000000  |   |                           |
| 5370: 78   | 16 63      | 1 79 16 64 | 0 | 1301.8704300 1301.8709110 |
| -0.0004810 | -0.0003000 | 0.0000000  |   |                           |
| 5371: 77   | 16 62      | 1 78 16 63 | 0 | 1302.1394900 1302.1388824 |
| 0.0006076  | -0.0003000 | 0.0000000  |   |                           |
| 5372: 73   | 16 58      | 1 74 16 59 | 0 | 1303.2108000 1303.2107262 |
| 0.0000738  | -0.0003000 | 0.0000000  |   |                           |
| 5373: 72   | 16 57      | 1 73 16 58 | 0 | 1303.4790200 1303.4786681 |
| 0.0003519  | -0.0003000 | 0.0000000  |   |                           |
| 5374: 71   | 16 56      | 1 72 16 57 | 0 | 1303.7459700 1303.7465989 |
| -0.0006289 | -0.0003000 | 0.0000000  |   |                           |
| 5375: 70   | 16 55      | 1 71 16 56 | 0 | 1304.0144600 1304.0145169 |
| -0.0000569 | -0.0003000 | 0.0000000  |   |                           |
| 5376: 69   | 16 54      | 1 70 16 55 | 0 | 1304.2823900 1304.2824203 |
| -0.0000303 | -0.0003000 | 0.0000000  |   |                           |
| 5377: 67   | 16 52      | 1 68 16 53 | 0 | 1304.8175100 1304.8181768 |
| -0.0006668 | -0.0003000 | 0.0000000  |   |                           |
| 5378: 66   | 16 51      | 1 67 16 52 | 0 | 1305.0860200 1305.0860264 |
| -0.0000064 | -0.0003000 | 0.0000000  |   |                           |
| 5379: 65   | 16 50      | 1 66 16 51 | 0 | 1305.3543800 1305.3538545 |
| 0.0005255  | -0.0003000 | 0.0000000  |   |                           |
| 5380: 64   | 16 49      | 1 65 16 50 | 0 | 1305.6213600 1305.6216595 |
| -0.0002995 | -0.0003000 | 0.0000000  |   |                           |
| 5381: 63   | 16 48      | 1 64 16 49 | 0 | 1305.8894900 1305.8894396 |
| 0.0000504  | -0.0003000 | 0.0000000  |   |                           |
| 5382: 62   | 16 47      | 1 63 16 48 | 0 | 1306.1572500 1306.1571931 |
| 0.0000569  | -0.0003000 | 0.0000000  |   |                           |
| 5383: 61   | 16 46      | 1 62 16 47 | 0 | 1306.4251900 1306.4249182 |
| 0.0002718  | -0.0003000 | 0.0000000  |   |                           |
| 5384: 60   | 16 45      | 1 61 16 46 | 0 | 1306.6928200 1306.6926132 |
| 0.0002068  | -0.0003000 | 0.0000000  |   |                           |
| 5385: 59   | 16 44      | 1 60 16 45 | 0 | 1306.9604300 1306.9602765 |
| 0.0001535  | -0.0003000 | 0.0000000  |   |                           |
| 5386: 58   | 16 43      | 1 59 16 44 | 0 | 1307.2282700 1307.2279061 |
| 0.0003639  | -0.0003000 | 0.0000000  |   |                           |
| 5387: 57   | 16 42      | 1 58 16 43 | 0 | 1307.4957000 1307.4955005 |
| 0.0001995  | -0.0003000 | 0.0000000  |   |                           |
| 5388: 56   | 16 41      | 1 57 16 42 | 0 | 1307.7631400 1307.7630578 |
| 0.0000822  | -0.0003000 | 0.0000000  |   |                           |
| 5389: 55   | 16 40      | 1 56 16 41 | 0 | 1308.0302400 1308.0305763 |
| -0.0003363 | -0.0003000 | 0.0000000  |   |                           |
| 5390: 54   | 16 39      | 1 55 16 40 | 0 | 1308.2979900 1308.2980544 |
| -0.0000644 | -0.0003000 | 0.0000000  |   |                           |
| 5391: 53   | 16 38      | 1 54 16 39 | 0 | 1308.5656900 1308.5654902 |
| 0.0001998  | -0.0003000 | 0.0000000  |   |                           |
| 5392: 52   | 16 37      | 1 53 16 38 | 0 | 1308.8333800 1308.8328820 |
| 0.0004980  | -0.0003000 | 0.0000000  |   |                           |

|                                 |              |              |
|---------------------------------|--------------|--------------|
| 5393: 49 16 34 1 50 16 35 0     | 1309.6347500 | 1309.6347763 |
| -0.0000263 -0.0003000 0.0000000 |              |              |
| 5394: 48 16 33 1 49 16 34 0     | 1309.9018700 | 1309.9019748 |
| -0.0001048 -0.0003000 0.0000000 |              |              |
| 5395: 47 16 32 1 48 16 33 0     | 1310.1691300 | 1310.1691207 |
| 0.0000093 -0.0003000 0.0000000  |              |              |
| 5396: 46 16 31 1 47 16 32 0     | 1310.4362300 | 1310.4362122 |
| 0.0000178 -0.0003000 0.0000000  |              |              |
| 5397: 45 16 30 1 46 16 31 0     | 1310.7033600 | 1310.7032476 |
| 0.0001124 -0.0003000 0.0000000  |              |              |
| 5398: 44 16 29 1 45 16 30 0     | 1310.9700200 | 1310.9702250 |
| -0.0002050 -0.0003000 0.0000000 |              |              |
| 5399: 43 16 28 1 44 16 29 0     | 1311.2369000 | 1311.2371429 |
| -0.0002429 -0.0003000 0.0000000 |              |              |
| 5400: 42 16 27 1 43 16 28 0     | 1311.5040200 | 1311.5039995 |
| 0.0000205 -0.0003000 0.0000000  |              |              |
| 5401: 41 16 26 1 42 16 27 0     | 1311.7707000 | 1311.7707929 |
| -0.0000929 -0.0003000 0.0000000 |              |              |
| 5402: 40 16 25 1 41 16 26 0     | 1312.0376900 | 1312.0375216 |
| 0.0001684 -0.0003000 0.0000000  |              |              |
| 5403: 39 16 24 1 40 16 25 0     | 1312.3040700 | 1312.3041837 |
| -0.0001137 -0.0003000 0.0000000 |              |              |
| 5404: 37 16 22 1 38 16 23 0     | 1312.8376800 | 1312.8373015 |
| 0.0003785 -0.0003000 0.0000000  |              |              |
| 5405: 36 16 21 1 37 16 22 0     | 1313.1036100 | 1313.1037536 |
| -0.0001436 -0.0003000 0.0000000 |              |              |
| 5406: 35 16 20 1 36 16 21 0     | 1313.3700900 | 1313.3701323 |
| -0.0000423 -0.0003000 0.0000000 |              |              |
| 5407: 34 16 19 1 35 16 20 0     | 1313.6361700 | 1313.6364358 |
| -0.0002658 -0.0003000 0.0000000 |              |              |
| 5408: 33 16 18 1 34 16 19 0     | 1313.9022000 | 1313.9026624 |
| -0.0004624 -0.0003000 0.0000000 |              |              |
| 5409: 32 16 17 1 33 16 18 0     | 1314.1690800 | 1314.1688103 |
| 0.0002697 -0.0003000 0.0000000  |              |              |
| 5410: 31 16 16 1 32 16 17 0     | 1314.4346300 | 1314.4348778 |
| -0.0002478 -0.0003000 0.0000000 |              |              |
| 5411: 30 16 15 1 31 16 16 0     | 1314.7009800 | 1314.7008633 |
| 0.0001167 -0.0003000 0.0000000  |              |              |
| 5412: 29 16 14 1 30 16 15 0     | 1314.9670200 | 1314.9667650 |
| 0.0002550 -0.0003000 0.0000000  |              |              |
| 5413: 28 16 13 1 29 16 14 0     | 1315.2326200 | 1315.2325811 |
| 0.0000389 -0.0003000 0.0000000  |              |              |
| 5414: 27 16 12 1 28 16 13 0     | 1315.4981100 | 1315.4983099 |
| -0.0001999 -0.0003000 0.0000000 |              |              |
| 5415: 26 16 11 1 27 16 12 0     | 1315.7645600 | 1315.7639498 |
| 0.0006102 -0.0003000 0.0000000  |              |              |
| 5416: 25 16 10 1 26 16 11 0     | 1316.0297300 | 1316.0294989 |
| 0.0002311 -0.0003000 0.0000000  |              |              |
| 5417: 23 16 8 1 24 16 9 0       | 1316.5607300 | 1316.5603182 |
| 0.0004118 -0.0003000 0.0000000  |              |              |
| 5418: 22 16 7 1 23 16 8 0       | 1316.8255400 | 1316.8255850 |
| -0.0000450 -0.0003000 0.0000000 |              |              |
| 5419: 21 16 6 1 22 16 7 0       | 1317.0911200 | 1317.0907541 |
| 0.0003659 -0.0003000 0.0000000  |              |              |
| 5420: 20 16 5 1 21 16 6 0       | 1317.3560900 | 1317.3558240 |
| 0.0002660 -0.0003000 0.0000000  |              |              |
| 5421: 19 16 4 1 20 16 5 0       | 1317.6208000 | 1317.6207928 |
| 0.0000072 -0.0003000 0.0000000  |              |              |
| 5422: 18 16 3 1 19 16 4 0       | 1317.8854200 | 1317.8856590 |
| -0.0002390 -0.0003000 0.0000000 |              |              |
| 5423: 17 16 2 1 16 16 1 0       | 1327.3379000 | 1327.3380107 |
| -0.0001107 -0.0003000 0.0000000 |              |              |
| 5424: 18 16 3 1 17 16 2 0       | 1327.5979800 | 1327.5978749 |
| 0.0001051 -0.0003000 0.0000000  |              |              |
| 5425: 19 16 4 1 18 16 3 0       | 1327.8575300 | 1327.8575713 |

|              |            |           |    |              |
|--------------|------------|-----------|----|--------------|
| -0.0000413   | -0.0003000 | 0.0000000 |    |              |
| 5426:        | 22         | 16        | 7  | 1 21 16 6 0  |
|              |            |           |    | 1328.6354500 |
| 1328.6356368 |            |           |    |              |
| -0.0001868   | -0.0003000 | 0.0000000 |    |              |
| 5427:        | 23         | 16        | 8  | 1 22 16 7 0  |
|              |            |           |    | 1328.8946200 |
| 1328.8946450 |            |           |    |              |
| -0.0000250   | -0.0003000 | 0.0000000 |    |              |
| 5428:        | 24         | 16        | 9  | 1 23 16 8 0  |
|              |            |           |    | 1329.1535300 |
| 1329.1534767 |            |           |    |              |
| 0.0000533    | -0.0003000 | 0.0000000 |    |              |
| 5429:        | 25         | 16        | 10 | 1 24 16 9 0  |
|              |            |           |    | 1329.4124900 |
| 1329.4121304 |            |           |    |              |
| 0.0003596    | -0.0003000 | 0.0000000 |    |              |
| 5430:        | 26         | 16        | 11 | 1 25 16 10 0 |
|              |            |           |    | 1329.6712200 |
| 1329.6706041 |            |           |    |              |
| 0.0006159    | -0.0003000 | 0.0000000 |    |              |
| 5431:        | 27         | 16        | 12 | 1 26 16 11 0 |
|              |            |           |    | 1329.9286700 |
| 1329.9288962 |            |           |    |              |
| -0.0002262   | -0.0003000 | 0.0000000 |    |              |
| 5432:        | 28         | 16        | 13 | 1 27 16 12 0 |
|              |            |           |    | 1330.1872800 |
| 1330.1870049 |            |           |    |              |
| 0.0002751    | -0.0003000 | 0.0000000 |    |              |
| 5433:        | 29         | 16        | 14 | 1 28 16 13 0 |
|              |            |           |    | 1330.4452400 |
| 1330.4449285 |            |           |    |              |
| 0.0003115    | -0.0003000 | 0.0000000 |    |              |
| 5434:        | 31         | 16        | 16 | 1 30 16 15 0 |
|              |            |           |    | 1330.9601100 |
| 1330.9602131 |            |           |    |              |
| -0.0001031   | -0.0003000 | 0.0000000 |    |              |
| 5435:        | 32         | 16        | 17 | 1 31 16 16 0 |
|              |            |           |    | 1331.2174500 |
| 1331.2175707 |            |           |    |              |
| -0.0001207   | -0.0003000 | 0.0000000 |    |              |
| 5436:        | 33         | 16        | 18 | 1 32 16 17 0 |
|              |            |           |    | 1331.4753000 |
| 1331.4747360 |            |           |    |              |
| 0.0005640    | -0.0003000 | 0.0000000 |    |              |
| 5437:        | 34         | 16        | 19 | 1 33 16 18 0 |
|              |            |           |    | 1331.7320100 |
| 1331.7317074 |            |           |    |              |
| 0.0003026    | -0.0003000 | 0.0000000 |    |              |
| 5438:        | 35         | 16        | 20 | 1 34 16 19 0 |
|              |            |           |    | 1331.9886300 |
| 1331.9884831 |            |           |    |              |
| 0.0001469    | -0.0003000 | 0.0000000 |    |              |
| 5439:        | 36         | 16        | 21 | 1 35 16 20 0 |
|              |            |           |    | 1332.2455400 |
| 1332.2450612 |            |           |    |              |
| 0.0004788    | -0.0003000 | 0.0000000 |    |              |
| 5440:        | 37         | 16        | 22 | 1 36 16 21 0 |
|              |            |           |    | 1332.5013000 |
| 1332.5014399 |            |           |    |              |
| -0.0001399   | -0.0003000 | 0.0000000 |    |              |
| 5441:        | 38         | 16        | 23 | 1 37 16 22 0 |
|              |            |           |    | 1332.7571900 |
| 1332.7576176 |            |           |    |              |
| -0.0004276   | -0.0003000 | 0.0000000 |    |              |
| 5442:        | 39         | 16        | 24 | 1 38 16 23 0 |
|              |            |           |    | 1333.0136000 |
| 1333.0135923 |            |           |    |              |
| 0.0000077    | -0.0003000 | 0.0000000 |    |              |
| 5443:        | 40         | 16        | 25 | 1 39 16 24 0 |
|              |            |           |    | 1333.2694900 |
| 1333.2693623 |            |           |    |              |
| 0.0001277    | -0.0003000 | 0.0000000 |    |              |
| 5444:        | 41         | 16        | 26 | 1 40 16 25 0 |
|              |            |           |    | 1333.5248900 |
| 1333.5249258 |            |           |    |              |
| -0.0000358   | -0.0003000 | 0.0000000 |    |              |
| 5445:        | 42         | 16        | 27 | 1 41 16 26 0 |
|              |            |           |    | 1333.7803500 |
| 1333.7802809 |            |           |    |              |
| 0.0000691    | -0.0003000 | 0.0000000 |    |              |
| 5446:        | 43         | 16        | 28 | 1 42 16 27 0 |
|              |            |           |    | 1334.0356300 |
| 1334.0354259 |            |           |    |              |
| 0.0002041    | -0.0003000 | 0.0000000 |    |              |
| 5447:        | 44         | 16        | 29 | 1 43 16 28 0 |
|              |            |           |    | 1334.2902800 |
| 1334.2903589 |            |           |    |              |
| -0.0000789   | -0.0003000 | 0.0000000 |    |              |
| 5448:        | 45         | 16        | 30 | 1 44 16 29 0 |
|              |            |           |    | 1334.5447300 |
| 1334.5450780 |            |           |    |              |
| -0.0003480   | -0.0003000 | 0.0000000 |    |              |
| 5449:        | 46         | 16        | 31 | 1 45 16 30 0 |
|              |            |           |    | 1334.7998700 |
| 1334.7995815 |            |           |    |              |
| 0.0002885    | -0.0003000 | 0.0000000 |    |              |
| 5450:        | 47         | 16        | 32 | 1 46 16 31 0 |
|              |            |           |    | 1335.0537600 |
| 1335.0538675 |            |           |    |              |
| -0.0001075   | -0.0003000 | 0.0000000 |    |              |
| 5451:        | 48         | 16        | 33 | 1 47 16 32 0 |
|              |            |           |    | 1335.3080100 |
| 1335.3079341 |            |           |    |              |
| 0.0000759    | -0.0003000 | 0.0000000 |    |              |
| 5452:        | 49         | 16        | 34 | 1 48 16 33 0 |
|              |            |           |    | 1335.5617900 |
| 1335.5617795 |            |           |    |              |
| 0.0000105    | -0.0003000 | 0.0000000 |    |              |
| 5453:        | 50         | 16        | 35 | 1 49 16 34 0 |
|              |            |           |    | 1335.8152400 |
| 1335.8154019 |            |           |    |              |
| -0.0001619   | -0.0003000 | 0.0000000 |    |              |
| 5454:        | 51         | 16        | 36 | 1 50 16 35 0 |
|              |            |           |    | 1336.0684900 |
| 1336.0687993 |            |           |    |              |
| -0.0003093   | -0.0003000 | 0.0000000 |    |              |
| 5455:        | 53         | 16        | 38 | 1 52 16 37 0 |
|              |            |           |    | 1336.5750500 |
| 1336.5749117 |            |           |    |              |
| 0.0001383    | -0.0003000 | 0.0000000 |    |              |
| 5456:        | 54         | 16        | 39 | 1 53 16 38 0 |
|              |            |           |    | 1336.8274300 |
| 1336.8276230 |            |           |    |              |
| -0.0001930   | -0.0003000 | 0.0000000 |    |              |
| 5457:        | 55         | 16        | 40 | 1 54 16 39 0 |
|              |            |           |    | 1337.0801600 |
| 1337.0801017 |            |           |    |              |
| 0.0000583    | -0.0003000 | 0.0000000 |    |              |

|                                 |              |              |
|---------------------------------|--------------|--------------|
| 5458: 56 16 41 1 55 16 40 0     | 1337.3324600 | 1337.3323461 |
| 0.0001139 -0.0003000 0.0000000  |              |              |
| 5459: 57 16 42 1 56 16 41 0     | 1337.5845400 | 1337.5843541 |
| 0.0001859 -0.0003000 0.0000000  |              |              |
| 5460: 58 16 43 1 57 16 42 0     | 1337.8361500 | 1337.8361238 |
| 0.0000262 -0.0003000 0.0000000  |              |              |
| 5461: 59 16 44 1 58 16 43 0     | 1338.0879000 | 1338.0876534 |
| 0.0002466 -0.0003000 0.0000000  |              |              |
| 5462: 60 16 45 1 59 16 44 0     | 1338.3393200 | 1338.3389409 |
| 0.0003791 -0.0003000 0.0000000  |              |              |
| 5463: 61 16 46 1 60 16 45 0     | 1338.5900800 | 1338.5899843 |
| 0.0000957 -0.0003000 0.0000000  |              |              |
| 5464: 64 16 49 1 63 16 48 0     | 1339.3416900 | 1339.3416304 |
| 0.0000596 -0.0003000 0.0000000  |              |              |
| 5465: 65 16 50 1 64 16 49 0     | 1339.5917400 | 1339.5916778 |
| 0.0000622 -0.0003000 0.0000000  |              |              |
| 5466: 66 16 51 1 65 16 50 0     | 1339.8416100 | 1339.8414713 |
| 0.0001387 -0.0003000 0.0000000  |              |              |
| 5467: 67 16 52 1 66 16 51 0     | 1340.0915100 | 1340.0910088 |
| 0.0005012 -0.0003000 0.0000000  |              |              |
| 5468: 68 16 53 1 67 16 52 0     | 1340.3400300 | 1340.3402884 |
| -0.0002584 -0.0003000 0.0000000 |              |              |
| 5469: 69 16 54 1 68 16 53 0     | 1340.5894400 | 1340.5893079 |
| 0.0001321 -0.0003000 0.0000000  |              |              |
| 5470: 70 16 55 1 69 16 54 0     | 1340.8376600 | 1340.8380654 |
| -0.0004054 -0.0003000 0.0000000 |              |              |
| 5471: 71 16 56 1 70 16 55 0     | 1341.0858800 | 1341.0865589 |
| -0.0006789 -0.0003000 0.0000000 |              |              |
| 5472: 72 16 57 1 71 16 56 0     | 1341.3349600 | 1341.3347862 |
| 0.0001738 -0.0003000 0.0000000  |              |              |
| 5473: 73 16 58 1 72 16 57 0     | 1341.5829400 | 1341.5827453 |
| 0.0001947 -0.0003000 0.0000000  |              |              |
| 5474: 74 16 59 1 73 16 58 0     | 1341.8300800 | 1341.8304341 |
| -0.0003541 -0.0003000 0.0000000 |              |              |
| 5475: 75 16 60 1 74 16 59 0     | 1342.0778300 | 1342.0778506 |
| -0.0000206 -0.0003000 0.0000000 |              |              |
| 5476: 76 16 61 1 75 16 60 0     | 1342.3246800 | 1342.3249927 |
| -0.0003127 -0.0003000 0.0000000 |              |              |
| 5477: 77 16 62 1 76 16 61 0     | 1342.5718500 | 1342.5718581 |
| -0.0000081 -0.0003000 0.0000000 |              |              |
| 5478: 78 16 63 1 77 16 62 0     | 1342.8177600 | 1342.8184449 |
| -0.0006849 -0.0003000 0.0000000 |              |              |
| 5479: 79 16 64 1 78 16 63 0     | 1343.0645200 | 1343.0647509 |
| -0.0002309 -0.0003000 0.0000000 |              |              |
| 5480: 80 16 65 1 79 16 64 0     | 1343.3102300 | 1343.3107739 |
| -0.0005439 -0.0003000 0.0000000 |              |              |
| 5481: 81 16 66 1 80 16 65 0     | 1343.5560100 | 1343.5565118 |
| -0.0005018 -0.0003000 0.0000000 |              |              |
| 5482: 82 16 67 1 81 16 66 0     | 1343.8021100 | 1343.8019624 |
| 0.0001476 -0.0003000 0.0000000  |              |              |
| 5483: 83 16 68 1 82 16 67 0     | 1344.0474300 | 1344.0471235 |
| 0.0003065 -0.0003000 0.0000000  |              |              |
| 5484: 80 17 63 1 81 17 64 0     | 1300.9922300 | 1300.9926098 |
| -0.0003798 -0.0003000 0.0000000 |              |              |
| 5485: 79 17 62 1 80 17 63 0     | 1301.2605900 | 1301.2605564 |
| 0.0000336 -0.0003000 0.0000000  |              |              |
| 5486: 77 17 60 1 78 17 61 0     | 1301.7963900 | 1301.7964532 |
| -0.0000632 -0.0003000 0.0000000 |              |              |
| 5487: 76 17 59 1 77 17 60 0     | 1302.0642200 | 1302.0643999 |
| -0.0001799 -0.0003000 0.0000000 |              |              |
| 5488: 75 17 58 1 76 17 59 0     | 1302.3320100 | 1302.3323434 |
| -0.0003334 -0.0003000 0.0000000 |              |              |
| 5489: 74 17 57 1 75 17 58 0     | 1302.6001800 | 1302.6002819 |
| -0.0001019 -0.0003000 0.0000000 |              |              |
| 5490: 73 17 56 1 74 17 57 0     | 1302.8680400 | 1302.8682138 |

|              |            |           |    |              |
|--------------|------------|-----------|----|--------------|
| -0.0001738   | -0.0003000 | 0.0000000 |    |              |
| 5491:        | 72         | 17        | 55 | 1 73 17 56 0 |
| 1303.1357100 |            |           |    | 1303.1361372 |
| -0.0004272   | -0.0003000 | 0.0000000 |    |              |
| 5492:        | 71         | 17        | 54 | 1 72 17 55 0 |
| 1303.4041500 |            |           |    | 1303.4040507 |
| 0.0000993    | -0.0003000 | 0.0000000 |    |              |
| 5493:        | 70         | 17        | 53 | 1 71 17 54 0 |
| 1303.6722000 |            |           |    | 1303.6719524 |
| 0.0002476    | -0.0003000 | 0.0000000 |    |              |
| 5494:        | 69         | 17        | 52 | 1 70 17 53 0 |
| 1303.9400500 |            |           |    | 1303.9398407 |
| 0.0002093    | -0.0003000 | 0.0000000 |    |              |
| 5495:        | 68         | 17        | 51 | 1 69 17 52 0 |
| 1304.2081700 |            |           |    | 1304.2077138 |
| 0.0004562    | -0.0003000 | 0.0000000 |    |              |
| 5496:        | 67         | 17        | 50 | 1 68 17 51 0 |
| 1304.4760700 |            |           |    | 1304.4755701 |
| 0.0004999    | -0.0003000 | 0.0000000 |    |              |
| 5497:        | 66         | 17        | 49 | 1 67 17 50 0 |
| 1304.7433500 |            |           |    | 1304.7434079 |
| -0.0000579   | -0.0003000 | 0.0000000 |    |              |
| 5498:        | 64         | 17        | 47 | 1 65 17 48 0 |
| 1305.2788100 |            |           |    | 1305.2790210 |
| -0.0002110   | -0.0003000 | 0.0000000 |    |              |
| 5499:        | 61         | 17        | 44 | 1 62 17 45 0 |
| 1306.0825900 |            |           |    | 1306.0822590 |
| 0.0003310    | -0.0003000 | 0.0000000 |    |              |
| 5500:        | 60         | 17        | 43 | 1 61 17 44 0 |
| 1306.3498200 |            |           |    | 1306.3499498 |
| -0.0001298   | -0.0003000 | 0.0000000 |    |              |
| 5501:        | 59         | 17        | 42 | 1 60 17 43 0 |
| 1306.6177500 |            |           |    | 1306.6176100 |
| 0.0001400    | -0.0003000 | 0.0000000 |    |              |
| 5502:        | 57         | 17        | 40 | 1 58 17 41 0 |
| 1307.1533800 |            |           |    | 1307.1528320 |
| 0.0005480    | -0.0003000 | 0.0000000 |    |              |
| 5503:        | 56         | 17        | 39 | 1 57 17 40 0 |
| 1307.4207700 |            |           |    | 1307.4203904 |
| 0.0003796    | -0.0003000 | 0.0000000 |    |              |
| 5504:        | 55         | 17        | 38 | 1 56 17 39 0 |
| 1307.6879900 |            |           |    | 1307.6879115 |
| 0.0000785    | -0.0003000 | 0.0000000 |    |              |
| 5505:        | 54         | 17        | 37 | 1 55 17 38 0 |
| 1307.9558100 |            |           |    | 1307.9553934 |
| 0.0004166    | -0.0003000 | 0.0000000 |    |              |
| 5506:        | 53         | 17        | 36 | 1 54 17 37 0 |
| 1308.2229500 |            |           |    | 1308.2228345 |
| 0.0001155    | -0.0003000 | 0.0000000 |    |              |
| 5507:        | 52         | 17        | 35 | 1 53 17 36 0 |
| 1308.4901400 |            |           |    | 1308.4902331 |
| -0.0000931   | -0.0003000 | 0.0000000 |    |              |
| 5508:        | 51         | 17        | 34 | 1 52 17 35 0 |
| 1308.7578300 |            |           |    | 1308.7575874 |
| 0.0002426    | -0.0003000 | 0.0000000 |    |              |
| 5509:        | 50         | 17        | 33 | 1 51 17 34 0 |
| 1309.0253300 |            |           |    | 1309.0248957 |
| 0.0004343    | -0.0003000 | 0.0000000 |    |              |
| 5510:        | 49         | 17        | 32 | 1 50 17 33 0 |
| 1309.2922900 |            |           |    | 1309.2921563 |
| 0.0001337    | -0.0003000 | 0.0000000 |    |              |
| 5511:        | 48         | 17        | 31 | 1 49 17 32 0 |
| 1309.5591800 |            |           |    | 1309.5593674 |
| -0.0001874   | -0.0003000 | 0.0000000 |    |              |
| 5512:        | 47         | 17        | 30 | 1 48 17 31 0 |
| 1309.8267200 |            |           |    | 1309.8265274 |
| 0.0001926    | -0.0003000 | 0.0000000 |    |              |
| 5513:        | 45         | 17        | 28 | 1 46 17 29 0 |
| 1310.3604100 |            |           |    | 1310.3606869 |
| -0.0002769   | -0.0003000 | 0.0000000 |    |              |
| 5514:        | 44         | 17        | 27 | 1 45 17 28 0 |
| 1310.6278500 |            |           |    | 1310.6276829 |
| 0.0001671    | -0.0003000 | 0.0000000 |    |              |
| 5515:        | 43         | 17        | 26 | 1 44 17 27 0 |
| 1310.8944500 |            |           |    | 1310.8946209 |
| -0.0001709   | -0.0003000 | 0.0000000 |    |              |
| 5516:        | 42         | 17        | 25 | 1 43 17 26 0 |
| 1311.1615700 |            |           |    | 1311.1614990 |
| 0.0000710    | -0.0003000 | 0.0000000 |    |              |
| 5517:        | 40         | 17        | 23 | 1 41 17 24 0 |
| 1311.6951300 |            |           |    | 1311.6950689 |
| 0.0000611    | -0.0003000 | 0.0000000 |    |              |
| 5518:        | 39         | 17        | 22 | 1 40 17 23 0 |
| 1311.9613800 |            |           |    | 1311.9617572 |
| -0.0003772   | -0.0003000 | 0.0000000 |    |              |
| 5519:        | 38         | 17        | 21 | 1 39 17 22 0 |
| 1312.2282400 |            |           |    | 1312.2283787 |
| -0.0001387   | -0.0003000 | 0.0000000 |    |              |
| 5520:        | 37         | 17        | 20 | 1 38 17 21 0 |
| 1312.4948000 |            |           |    | 1312.4949317 |
| -0.0001317   | -0.0003000 | 0.0000000 |    |              |
| 5521:        | 36         | 17        | 19 | 1 37 17 20 0 |
| 1312.7610200 |            |           |    | 1312.7614145 |
| -0.0003945   | -0.0003000 | 0.0000000 |    |              |
| 5522:        | 35         | 17        | 18 | 1 36 17 19 0 |
| 1313.0279100 |            |           |    | 1313.0278254 |
| 0.0000846    | -0.0003000 | 0.0000000 |    |              |

|            |            |           |    |   |    |    |    |   |              |              |
|------------|------------|-----------|----|---|----|----|----|---|--------------|--------------|
| 5523:      | 34         | 17        | 17 | 1 | 35 | 17 | 18 | 0 | 1313.2941400 | 1313.2941625 |
| -0.0000225 | -0.0003000 | 0.0000000 |    |   |    |    |    |   |              |              |
| 5524:      | 33         | 17        | 16 | 1 | 34 | 17 | 17 | 0 | 1313.5605000 | 1313.5604243 |
| 0.0000757  | -0.0003000 | 0.0000000 |    |   |    |    |    |   |              |              |
| 5525:      | 32         | 17        | 15 | 1 | 33 | 17 | 16 | 0 | 1313.8267700 | 1313.8266089 |
| 0.0001611  | -0.0003000 | 0.0000000 |    |   |    |    |    |   |              |              |
| 5526:      | 31         | 17        | 14 | 1 | 32 | 17 | 15 | 0 | 1314.0926300 | 1314.0927146 |
| -0.0000846 | -0.0003000 | 0.0000000 |    |   |    |    |    |   |              |              |
| 5527:      | 30         | 17        | 13 | 1 | 31 | 17 | 14 | 0 | 1314.3586600 | 1314.3587396 |
| -0.0000796 | -0.0003000 | 0.0000000 |    |   |    |    |    |   |              |              |
| 5528:      | 29         | 17        | 12 | 1 | 30 | 17 | 13 | 0 | 1314.6247000 | 1314.6246824 |
| 0.0000176  | -0.0003000 | 0.0000000 |    |   |    |    |    |   |              |              |
| 5529:      | 28         | 17        | 11 | 1 | 29 | 17 | 12 | 0 | 1314.8904900 | 1314.8905410 |
| -0.0000510 | -0.0003000 | 0.0000000 |    |   |    |    |    |   |              |              |
| 5530:      | 27         | 17        | 10 | 1 | 28 | 17 | 11 | 0 | 1315.1560500 | 1315.1563138 |
| -0.0002638 | -0.0003000 | 0.0000000 |    |   |    |    |    |   |              |              |
| 5531:      | 26         | 17        | 9  | 1 | 27 | 17 | 10 | 0 | 1315.4222400 | 1315.4219991 |
| 0.0002409  | -0.0003000 | 0.0000000 |    |   |    |    |    |   |              |              |
| 5532:      | 25         | 17        | 8  | 1 | 26 | 17 | 9  | 0 | 1315.6877100 | 1315.6875950 |
| 0.0001150  | -0.0003000 | 0.0000000 |    |   |    |    |    |   |              |              |
| 5533:      | 24         | 17        | 7  | 1 | 25 | 17 | 8  | 0 | 1315.9530500 | 1315.9530999 |
| -0.0000499 | -0.0003000 | 0.0000000 |    |   |    |    |    |   |              |              |
| 5534:      | 23         | 17        | 6  | 1 | 24 | 17 | 7  | 0 | 1316.2181900 | 1316.2185121 |
| -0.0003221 | -0.0003000 | 0.0000000 |    |   |    |    |    |   |              |              |
| 5535:      | 22         | 17        | 5  | 1 | 23 | 17 | 6  | 0 | 1316.4839700 | 1316.4838297 |
| 0.0001403  | -0.0003000 | 0.0000000 |    |   |    |    |    |   |              |              |
| 5536:      | 21         | 17        | 4  | 1 | 22 | 17 | 5  | 0 | 1316.7488000 | 1316.7490512 |
| -0.0002512 | -0.0003000 | 0.0000000 |    |   |    |    |    |   |              |              |
| 5537:      | 20         | 17        | 3  | 1 | 19 | 17 | 2  | 0 | 1327.7782000 | 1327.7784138 |
| -0.0002138 | -0.0003000 | 0.0000000 |    |   |    |    |    |   |              |              |
| 5538:      | 21         | 17        | 4  | 1 | 20 | 17 | 3  | 0 | 1328.0374000 | 1328.0378485 |
| -0.0004485 | -0.0003000 | 0.0000000 |    |   |    |    |    |   |              |              |
| 5539:      | 22         | 17        | 5  | 1 | 21 | 17 | 4  | 0 | 1328.2970200 | 1328.2971099 |
| -0.0000899 | -0.0003000 | 0.0000000 |    |   |    |    |    |   |              |              |
| 5540:      | 23         | 17        | 6  | 1 | 22 | 17 | 5  | 0 | 1328.5564700 | 1328.5561962 |
| 0.0002738  | -0.0003000 | 0.0000000 |    |   |    |    |    |   |              |              |
| 5541:      | 24         | 17        | 7  | 1 | 23 | 17 | 6  | 0 | 1328.8146300 | 1328.8151056 |
| -0.0004756 | -0.0003000 | 0.0000000 |    |   |    |    |    |   |              |              |
| 5542:      | 25         | 17        | 8  | 1 | 24 | 17 | 7  | 0 | 1329.0734100 | 1329.0738363 |
| -0.0004263 | -0.0003000 | 0.0000000 |    |   |    |    |    |   |              |              |
| 5543:      | 26         | 17        | 9  | 1 | 25 | 17 | 8  | 0 | 1329.3317000 | 1329.3323865 |
| -0.0006865 | -0.0003000 | 0.0000000 |    |   |    |    |    |   |              |              |
| 5544:      | 27         | 17        | 10 | 1 | 26 | 17 | 9  | 0 | 1329.5903900 | 1329.5907544 |
| -0.0003644 | -0.0003000 | 0.0000000 |    |   |    |    |    |   |              |              |
| 5545:      | 29         | 17        | 12 | 1 | 28 | 17 | 11 | 0 | 1330.1068000 | 1330.1069361 |
| -0.0001361 | -0.0003000 | 0.0000000 |    |   |    |    |    |   |              |              |
| 5546:      | 30         | 17        | 13 | 1 | 29 | 17 | 12 | 0 | 1330.3645000 | 1330.3647461 |
| -0.0002461 | -0.0003000 | 0.0000000 |    |   |    |    |    |   |              |              |
| 5547:      | 32         | 17        | 15 | 1 | 31 | 17 | 14 | 0 | 1330.8799100 | 1330.8797958 |
| 0.0001142  | -0.0003000 | 0.0000000 |    |   |    |    |    |   |              |              |
| 5548:      | 34         | 17        | 17 | 1 | 33 | 17 | 16 | 0 | 1331.3947500 | 1331.3940724 |
| 0.0006776  | -0.0003000 | 0.0000000 |    |   |    |    |    |   |              |              |
| 5549:      | 35         | 17        | 18 | 1 | 34 | 17 | 17 | 0 | 1331.6511400 | 1331.6509163 |
| 0.0002237  | -0.0003000 | 0.0000000 |    |   |    |    |    |   |              |              |
| 5550:      | 36         | 17        | 19 | 1 | 35 | 17 | 18 | 0 | 1331.9081700 | 1331.9075615 |
| 0.0006085  | -0.0003000 | 0.0000000 |    |   |    |    |    |   |              |              |
| 5551:      | 37         | 17        | 20 | 1 | 36 | 17 | 19 | 0 | 1332.1642100 | 1332.1640060 |
| 0.0002040  | -0.0003000 | 0.0000000 |    |   |    |    |    |   |              |              |
| 5552:      | 38         | 17        | 21 | 1 | 37 | 17 | 20 | 0 | 1332.4203200 | 1332.4202480 |
| 0.0000720  | -0.0003000 | 0.0000000 |    |   |    |    |    |   |              |              |
| 5553:      | 39         | 17        | 22 | 1 | 38 | 17 | 21 | 0 | 1332.6763500 | 1332.6762857 |
| 0.0000643  | -0.0003000 | 0.0000000 |    |   |    |    |    |   |              |              |
| 5554:      | 40         | 17        | 23 | 1 | 39 | 17 | 22 | 0 | 1332.9324300 | 1332.9321173 |
| 0.0003127  | -0.0003000 | 0.0000000 |    |   |    |    |    |   |              |              |
| 5555:      | 41         | 17        | 24 | 1 | 40 | 17 | 23 | 0 | 1333.1876800 | 1333.1877407 |

|            |            |           |              |              |
|------------|------------|-----------|--------------|--------------|
| -0.0000607 | -0.0003000 | 0.0000000 |              |              |
| 5556:      | 42         | 17        | 25           | 1 41 17 24 0 |
| 0.0002058  | -0.0003000 | 0.0000000 | 1333.4433600 | 1333.4431542 |
| 5557:      | 43         | 17        | 26           | 1 42 17 25 0 |
| -0.0000559 | -0.0003000 | 0.0000000 | 1333.6983000 | 1333.6983559 |
| 5558:      | 44         | 17        | 27           | 1 43 17 26 0 |
| -0.0000439 | -0.0003000 | 0.0000000 | 1333.9533000 | 1333.9533439 |
| 5559:      | 45         | 17        | 28           | 1 44 17 27 0 |
| 0.0002038  | -0.0003000 | 0.0000000 | 1334.2083200 | 1334.2081162 |
| 5560:      | 46         | 17        | 29           | 1 45 17 28 0 |
| -0.0003010 | -0.0003000 | 0.0000000 | 1334.4623700 | 1334.4626710 |
| 5561:      | 47         | 17        | 30           | 1 46 17 29 0 |
| -0.0001064 | -0.0003000 | 0.0000000 | 1334.7169000 | 1334.7170064 |
| 5562:      | 48         | 17        | 31           | 1 47 17 30 0 |
| 0.0000896  | -0.0003000 | 0.0000000 | 1334.9712100 | 1334.9711204 |
| 5563:      | 49         | 17        | 32           | 1 48 17 31 0 |
| -0.0000512 | -0.0003000 | 0.0000000 | 1335.2249600 | 1335.2250112 |
| 5564:      | 50         | 17        | 33           | 1 49 17 32 0 |
| -0.0005467 | -0.0003000 | 0.0000000 | 1335.4781300 | 1335.4786767 |
| 5565:      | 51         | 17        | 34           | 1 50 17 33 0 |
| -0.0001951 | -0.0003000 | 0.0000000 | 1335.7319200 | 1335.7321151 |
| 5566:      | 52         | 17        | 35           | 1 51 17 34 0 |
| 0.0001555  | -0.0003000 | 0.0000000 | 1335.9854800 | 1335.9853245 |
| 5567:      | 53         | 17        | 36           | 1 52 17 35 0 |
| -0.0001028 | -0.0003000 | 0.0000000 | 1336.2382000 | 1336.2383028 |
| 5568:      | 54         | 17        | 37           | 1 53 17 36 0 |
| -0.0005681 | -0.0003000 | 0.0000000 | 1336.4904800 | 1336.4910481 |
| 5569:      | 55         | 17        | 38           | 1 54 17 37 0 |
| -0.0001884 | -0.0003000 | 0.0000000 | 1336.7433700 | 1336.7435584 |
| 5570:      | 56         | 17        | 39           | 1 55 17 38 0 |
| 0.0002981  | -0.0003000 | 0.0000000 | 1336.9961300 | 1336.9958319 |
| 5571:      | 59         | 17        | 42           | 1 58 17 41 0 |
| 0.0000994  | -0.0003000 | 0.0000000 | 1337.7513100 | 1337.7512106 |
| 5572:      | 60         | 17        | 43           | 1 59 17 42 0 |
| 0.0000036  | -0.0003000 | 0.0000000 | 1338.0025200 | 1338.0025164 |
| 5573:      | 62         | 17        | 45           | 1 61 17 44 0 |
| -0.0004352 | -0.0003000 | 0.0000000 | 1338.5039500 | 1338.5043852 |
| 5574:      | 63         | 17        | 46           | 1 62 17 45 0 |
| 0.0003259  | -0.0003000 | 0.0000000 | 1338.7552700 | 1338.7549441 |
| 5575:      | 64         | 17        | 47           | 1 63 17 46 0 |
| -0.0003999 | -0.0003000 | 0.0000000 | 1339.0048500 | 1339.0052499 |
| 5576:      | 65         | 17        | 48           | 1 64 17 47 0 |
| -0.0003207 | -0.0003000 | 0.0000000 | 1339.2549800 | 1339.2553007 |
| 5577:      | 67         | 17        | 50           | 1 66 17 49 0 |
| 0.0003512  | -0.0003000 | 0.0000000 | 1339.7549800 | 1339.7546288 |
| 5578:      | 68         | 17        | 51           | 1 67 17 50 0 |
| -0.0000719 | -0.0003000 | 0.0000000 | 1340.0038300 | 1340.0039019 |
| 5579:      | 69         | 17        | 52           | 1 68 17 51 0 |
| -0.0001816 | -0.0003000 | 0.0000000 | 1340.2527300 | 1340.2529116 |
| 5580:      | 71         | 17        | 54           | 1 70 17 53 0 |
| 0.0000674  | -0.0003000 | 0.0000000 | 1340.7502000 | 1340.7501326 |
| 5581:      | 73         | 17        | 56           | 1 72 17 55 0 |
| 0.0004554  | -0.0003000 | 0.0000000 | 1341.2467300 | 1341.2462746 |
| 5582:      | 74         | 17        | 57           | 1 73 17 56 0 |
| 0.0004743  | -0.0003000 | 0.0000000 | 1341.4944100 | 1341.4939357 |
| 5583:      | 75         | 17        | 58           | 1 74 17 57 0 |
| 0.0000394  | -0.0003000 | 0.0000000 | 1341.7413600 | 1341.7413206 |
| 5584:      | 76         | 17        | 59           | 1 75 17 58 0 |
| -0.0001873 | -0.0003000 | 0.0000000 | 1341.9882400 | 1341.9884273 |
| 5585:      | 80         | 17        | 64           | 1 81 17 65 0 |
| -0.0003798 | -0.0003000 | 0.0000000 | 1300.9922300 | 1300.9926098 |
| 5586:      | 79         | 17        | 63           | 1 80 17 64 0 |
| 0.0000336  | -0.0003000 | 0.0000000 | 1301.2605900 | 1301.2605564 |
| 5587:      | 77         | 17        | 61           | 1 78 17 62 0 |
| -0.0000632 | -0.0003000 | 0.0000000 | 1301.7963900 | 1301.7964532 |

|                                 |              |              |
|---------------------------------|--------------|--------------|
| 5588: 76 17 60 1 77 17 61 0     | 1302.0642200 | 1302.0643999 |
| -0.0001799 -0.0003000 0.0000000 |              |              |
| 5589: 75 17 59 1 76 17 60 0     | 1302.3320100 | 1302.3323434 |
| -0.0003334 -0.0003000 0.0000000 |              |              |
| 5590: 74 17 58 1 75 17 59 0     | 1302.6001800 | 1302.6002819 |
| -0.0001019 -0.0003000 0.0000000 |              |              |
| 5591: 73 17 57 1 74 17 58 0     | 1302.8680400 | 1302.8682138 |
| -0.0001738 -0.0003000 0.0000000 |              |              |
| 5592: 72 17 56 1 73 17 57 0     | 1303.1357100 | 1303.1361372 |
| -0.0004272 -0.0003000 0.0000000 |              |              |
| 5593: 71 17 55 1 72 17 56 0     | 1303.4041500 | 1303.4040507 |
| 0.0000993 -0.0003000 0.0000000  |              |              |
| 5594: 70 17 54 1 71 17 55 0     | 1303.6722000 | 1303.6719524 |
| 0.0002476 -0.0003000 0.0000000  |              |              |
| 5595: 69 17 53 1 70 17 54 0     | 1303.9400500 | 1303.9398407 |
| 0.0002093 -0.0003000 0.0000000  |              |              |
| 5596: 68 17 52 1 69 17 53 0     | 1304.2081700 | 1304.2077138 |
| 0.0004562 -0.0003000 0.0000000  |              |              |
| 5597: 67 17 51 1 68 17 52 0     | 1304.4760700 | 1304.4755701 |
| 0.0004999 -0.0003000 0.0000000  |              |              |
| 5598: 66 17 50 1 67 17 51 0     | 1304.7433500 | 1304.7434079 |
| -0.0000579 -0.0003000 0.0000000 |              |              |
| 5599: 64 17 48 1 65 17 49 0     | 1305.2788100 | 1305.2790210 |
| -0.0002110 -0.0003000 0.0000000 |              |              |
| 5600: 61 17 45 1 62 17 46 0     | 1306.0825900 | 1306.0822590 |
| 0.0003310 -0.0003000 0.0000000  |              |              |
| 5601: 60 17 44 1 61 17 45 0     | 1306.3498200 | 1306.3499498 |
| -0.0001298 -0.0003000 0.0000000 |              |              |
| 5602: 59 17 43 1 60 17 44 0     | 1306.6177500 | 1306.6176100 |
| 0.0001400 -0.0003000 0.0000000  |              |              |
| 5603: 57 17 41 1 58 17 42 0     | 1307.1533800 | 1307.1528320 |
| 0.0005480 -0.0003000 0.0000000  |              |              |
| 5604: 56 17 40 1 57 17 41 0     | 1307.4207700 | 1307.4203904 |
| 0.0003796 -0.0003000 0.0000000  |              |              |
| 5605: 55 17 39 1 56 17 40 0     | 1307.6879900 | 1307.6879115 |
| 0.0000785 -0.0003000 0.0000000  |              |              |
| 5606: 54 17 38 1 55 17 39 0     | 1307.9558100 | 1307.9553934 |
| 0.0004166 -0.0003000 0.0000000  |              |              |
| 5607: 53 17 37 1 54 17 38 0     | 1308.2229500 | 1308.2228345 |
| 0.0001155 -0.0003000 0.0000000  |              |              |
| 5608: 52 17 36 1 53 17 37 0     | 1308.4901400 | 1308.4902331 |
| -0.0000931 -0.0003000 0.0000000 |              |              |
| 5609: 51 17 35 1 52 17 36 0     | 1308.7578300 | 1308.7575874 |
| 0.0002426 -0.0003000 0.0000000  |              |              |
| 5610: 50 17 34 1 51 17 35 0     | 1309.0253300 | 1309.0248957 |
| 0.0004343 -0.0003000 0.0000000  |              |              |
| 5611: 49 17 33 1 50 17 34 0     | 1309.2922900 | 1309.2921563 |
| 0.0001337 -0.0003000 0.0000000  |              |              |
| 5612: 48 17 32 1 49 17 33 0     | 1309.5591800 | 1309.5593674 |
| -0.0001874 -0.0003000 0.0000000 |              |              |
| 5613: 47 17 31 1 48 17 32 0     | 1309.8267200 | 1309.8265274 |
| 0.0001926 -0.0003000 0.0000000  |              |              |
| 5614: 45 17 29 1 46 17 30 0     | 1310.3604100 | 1310.3606869 |
| -0.0002769 -0.0003000 0.0000000 |              |              |
| 5615: 44 17 28 1 45 17 29 0     | 1310.6278500 | 1310.6276829 |
| 0.0001671 -0.0003000 0.0000000  |              |              |
| 5616: 43 17 27 1 44 17 28 0     | 1310.8944500 | 1310.8946209 |
| -0.0001709 -0.0003000 0.0000000 |              |              |
| 5617: 42 17 26 1 43 17 27 0     | 1311.1615700 | 1311.1614990 |
| 0.0000710 -0.0003000 0.0000000  |              |              |
| 5618: 40 17 24 1 41 17 25 0     | 1311.6951300 | 1311.6950689 |
| 0.0000611 -0.0003000 0.0000000  |              |              |
| 5619: 39 17 23 1 40 17 24 0     | 1311.9613800 | 1311.9617572 |
| -0.0003772 -0.0003000 0.0000000 |              |              |
| 5620: 38 17 22 1 39 17 23 0     | 1312.2282400 | 1312.2283787 |

|              |            |           |    |              |
|--------------|------------|-----------|----|--------------|
| -0.0001387   | -0.0003000 | 0.0000000 |    |              |
| 5621:        | 37         | 17        | 21 | 1 38 17 22 0 |
| 1312.4948000 |            |           |    | 1312.4949317 |
| -0.0001317   | -0.0003000 | 0.0000000 |    |              |
| 5622:        | 36         | 17        | 20 | 1 37 17 21 0 |
| 1312.7610200 |            |           |    | 1312.7614145 |
| -0.0003945   | -0.0003000 | 0.0000000 |    |              |
| 5623:        | 35         | 17        | 19 | 1 36 17 20 0 |
| 1313.0279100 |            |           |    | 1313.0278254 |
| 0.0000846    | -0.0003000 | 0.0000000 |    |              |
| 5624:        | 34         | 17        | 18 | 1 35 17 19 0 |
| 1313.2941400 |            |           |    | 1313.2941625 |
| -0.0000225   | -0.0003000 | 0.0000000 |    |              |
| 5625:        | 33         | 17        | 17 | 1 34 17 18 0 |
| 1313.5605000 |            |           |    | 1313.5604243 |
| 0.0000757    | -0.0003000 | 0.0000000 |    |              |
| 5626:        | 32         | 17        | 16 | 1 33 17 17 0 |
| 1313.8267700 |            |           |    | 1313.8266089 |
| 0.0001611    | -0.0003000 | 0.0000000 |    |              |
| 5627:        | 31         | 17        | 15 | 1 32 17 16 0 |
| 1314.0926300 |            |           |    | 1314.0927146 |
| -0.0000846   | -0.0003000 | 0.0000000 |    |              |
| 5628:        | 30         | 17        | 14 | 1 31 17 15 0 |
| 1314.3586600 |            |           |    | 1314.3587396 |
| -0.0000796   | -0.0003000 | 0.0000000 |    |              |
| 5629:        | 29         | 17        | 13 | 1 30 17 14 0 |
| 1314.6247000 |            |           |    | 1314.6246824 |
| 0.0000176    | -0.0003000 | 0.0000000 |    |              |
| 5630:        | 28         | 17        | 12 | 1 29 17 13 0 |
| 1314.8904900 |            |           |    | 1314.8905410 |
| -0.0000510   | -0.0003000 | 0.0000000 |    |              |
| 5631:        | 27         | 17        | 11 | 1 28 17 12 0 |
| 1315.1560500 |            |           |    | 1315.1563138 |
| -0.0002638   | -0.0003000 | 0.0000000 |    |              |
| 5632:        | 26         | 17        | 10 | 1 27 17 11 0 |
| 1315.4222400 |            |           |    | 1315.4219991 |
| 0.0002409    | -0.0003000 | 0.0000000 |    |              |
| 5633:        | 25         | 17        | 9  | 1 26 17 10 0 |
| 1315.6877100 |            |           |    | 1315.6875950 |
| 0.0001150    | -0.0003000 | 0.0000000 |    |              |
| 5634:        | 24         | 17        | 8  | 1 25 17 9 0  |
| 1315.9530500 |            |           |    | 1315.9530999 |
| -0.0000499   | -0.0003000 | 0.0000000 |    |              |
| 5635:        | 23         | 17        | 7  | 1 24 17 8 0  |
| 1316.2181900 |            |           |    | 1316.2185121 |
| -0.0003221   | -0.0003000 | 0.0000000 |    |              |
| 5636:        | 22         | 17        | 6  | 1 23 17 7 0  |
| 1316.4839700 |            |           |    | 1316.4838297 |
| 0.0001403    | -0.0003000 | 0.0000000 |    |              |
| 5637:        | 21         | 17        | 5  | 1 22 17 6 0  |
| 1316.7488000 |            |           |    | 1316.7490512 |
| -0.0002512   | -0.0003000 | 0.0000000 |    |              |
| 5638:        | 20         | 17        | 4  | 1 19 17 3 0  |
| 1327.7782000 |            |           |    | 1327.7784138 |
| -0.0002138   | -0.0003000 | 0.0000000 |    |              |
| 5639:        | 21         | 17        | 5  | 1 20 17 4 0  |
| 1328.0374000 |            |           |    | 1328.0378485 |
| -0.0004485   | -0.0003000 | 0.0000000 |    |              |
| 5640:        | 22         | 17        | 6  | 1 21 17 5 0  |
| 1328.2970200 |            |           |    | 1328.2971099 |
| -0.0000899   | -0.0003000 | 0.0000000 |    |              |
| 5641:        | 23         | 17        | 7  | 1 22 17 6 0  |
| 1328.5564700 |            |           |    | 1328.5561962 |
| 0.0002738    | -0.0003000 | 0.0000000 |    |              |
| 5642:        | 24         | 17        | 8  | 1 23 17 7 0  |
| 1328.8146300 |            |           |    | 1328.8151056 |
| -0.0004756   | -0.0003000 | 0.0000000 |    |              |
| 5643:        | 25         | 17        | 9  | 1 24 17 8 0  |
| 1329.0734100 |            |           |    | 1329.0738363 |
| -0.0004263   | -0.0003000 | 0.0000000 |    |              |
| 5644:        | 26         | 17        | 10 | 1 25 17 9 0  |
| 1329.3317000 |            |           |    | 1329.3323865 |
| -0.0006865   | -0.0003000 | 0.0000000 |    |              |
| 5645:        | 27         | 17        | 11 | 1 26 17 10 0 |
| 1329.5903900 |            |           |    | 1329.5907544 |
| -0.0003644   | -0.0003000 | 0.0000000 |    |              |
| 5646:        | 29         | 17        | 13 | 1 28 17 12 0 |
| 1330.1068000 |            |           |    | 1330.1069361 |
| -0.0001361   | -0.0003000 | 0.0000000 |    |              |
| 5647:        | 30         | 17        | 14 | 1 29 17 13 0 |
| 1330.3645000 |            |           |    | 1330.3647461 |
| -0.0002461   | -0.0003000 | 0.0000000 |    |              |
| 5648:        | 32         | 17        | 16 | 1 31 17 15 0 |
| 1330.8799100 |            |           |    | 1330.8797958 |
| 0.0001142    | -0.0003000 | 0.0000000 |    |              |
| 5649:        | 34         | 17        | 18 | 1 33 17 17 0 |
| 1331.3947500 |            |           |    | 1331.3940724 |
| 0.0006776    | -0.0003000 | 0.0000000 |    |              |
| 5650:        | 35         | 17        | 19 | 1 34 17 18 0 |
| 1331.6511400 |            |           |    | 1331.6509163 |
| 0.0002237    | -0.0003000 | 0.0000000 |    |              |
| 5651:        | 36         | 17        | 20 | 1 35 17 19 0 |
| 1331.9081700 |            |           |    | 1331.9075615 |
| 0.0006085    | -0.0003000 | 0.0000000 |    |              |
| 5652:        | 37         | 17        | 21 | 1 36 17 20 0 |
| 1332.1642100 |            |           |    | 1332.1640060 |
| 0.0002040    | -0.0003000 | 0.0000000 |    |              |

|       |            |            |           |   |    |    |    |   |              |              |
|-------|------------|------------|-----------|---|----|----|----|---|--------------|--------------|
| 5653: | 38         | 17         | 22        | 1 | 37 | 17 | 21 | 0 | 1332.4203200 | 1332.4202480 |
|       | 0.0000720  | -0.0003000 | 0.0000000 |   |    |    |    |   |              |              |
| 5654: | 39         | 17         | 23        | 1 | 38 | 17 | 22 | 0 | 1332.6763500 | 1332.6762857 |
|       | 0.0000643  | -0.0003000 | 0.0000000 |   |    |    |    |   |              |              |
| 5655: | 40         | 17         | 24        | 1 | 39 | 17 | 23 | 0 | 1332.9324300 | 1332.9321173 |
|       | 0.0003127  | -0.0003000 | 0.0000000 |   |    |    |    |   |              |              |
| 5656: | 41         | 17         | 25        | 1 | 40 | 17 | 24 | 0 | 1333.1876800 | 1333.1877407 |
|       | -0.0000607 | -0.0003000 | 0.0000000 |   |    |    |    |   |              |              |
| 5657: | 42         | 17         | 26        | 1 | 41 | 17 | 25 | 0 | 1333.4433600 | 1333.4431542 |
|       | 0.0002058  | -0.0003000 | 0.0000000 |   |    |    |    |   |              |              |
| 5658: | 43         | 17         | 27        | 1 | 42 | 17 | 26 | 0 | 1333.6983000 | 1333.6983559 |
|       | -0.0000559 | -0.0003000 | 0.0000000 |   |    |    |    |   |              |              |
| 5659: | 44         | 17         | 28        | 1 | 43 | 17 | 27 | 0 | 1333.9533000 | 1333.9533439 |
|       | -0.0000439 | -0.0003000 | 0.0000000 |   |    |    |    |   |              |              |
| 5660: | 45         | 17         | 29        | 1 | 44 | 17 | 28 | 0 | 1334.2083200 | 1334.2081162 |
|       | 0.0002038  | -0.0003000 | 0.0000000 |   |    |    |    |   |              |              |
| 5661: | 46         | 17         | 30        | 1 | 45 | 17 | 29 | 0 | 1334.4623700 | 1334.4626710 |
|       | -0.0003010 | -0.0003000 | 0.0000000 |   |    |    |    |   |              |              |
| 5662: | 47         | 17         | 31        | 1 | 46 | 17 | 30 | 0 | 1334.7169000 | 1334.7170064 |
|       | -0.0001064 | -0.0003000 | 0.0000000 |   |    |    |    |   |              |              |
| 5663: | 48         | 17         | 32        | 1 | 47 | 17 | 31 | 0 | 1334.9712100 | 1334.9711204 |
|       | 0.0000896  | -0.0003000 | 0.0000000 |   |    |    |    |   |              |              |
| 5664: | 49         | 17         | 33        | 1 | 48 | 17 | 32 | 0 | 1335.2249600 | 1335.2250112 |
|       | -0.0000512 | -0.0003000 | 0.0000000 |   |    |    |    |   |              |              |
| 5665: | 50         | 17         | 34        | 1 | 49 | 17 | 33 | 0 | 1335.4781300 | 1335.4786767 |
|       | -0.0005467 | -0.0003000 | 0.0000000 |   |    |    |    |   |              |              |
| 5666: | 51         | 17         | 35        | 1 | 50 | 17 | 34 | 0 | 1335.7319200 | 1335.7321151 |
|       | -0.0001951 | -0.0003000 | 0.0000000 |   |    |    |    |   |              |              |
| 5667: | 52         | 17         | 36        | 1 | 51 | 17 | 35 | 0 | 1335.9854800 | 1335.9853245 |
|       | 0.0001555  | -0.0003000 | 0.0000000 |   |    |    |    |   |              |              |
| 5668: | 53         | 17         | 37        | 1 | 52 | 17 | 36 | 0 | 1336.2382000 | 1336.2383028 |
|       | -0.0001028 | -0.0003000 | 0.0000000 |   |    |    |    |   |              |              |
| 5669: | 54         | 17         | 38        | 1 | 53 | 17 | 37 | 0 | 1336.4904800 | 1336.4910481 |
|       | -0.0005681 | -0.0003000 | 0.0000000 |   |    |    |    |   |              |              |
| 5670: | 55         | 17         | 39        | 1 | 54 | 17 | 38 | 0 | 1336.7433700 | 1336.7435584 |
|       | -0.0001884 | -0.0003000 | 0.0000000 |   |    |    |    |   |              |              |
| 5671: | 56         | 17         | 40        | 1 | 55 | 17 | 39 | 0 | 1336.9961300 | 1336.9958319 |
|       | 0.0002981  | -0.0003000 | 0.0000000 |   |    |    |    |   |              |              |
| 5672: | 59         | 17         | 43        | 1 | 58 | 17 | 42 | 0 | 1337.7513100 | 1337.7512106 |
|       | 0.0000994  | -0.0003000 | 0.0000000 |   |    |    |    |   |              |              |
| 5673: | 60         | 17         | 44        | 1 | 59 | 17 | 43 | 0 | 1338.0025200 | 1338.0025164 |
|       | 0.0000036  | -0.0003000 | 0.0000000 |   |    |    |    |   |              |              |
| 5674: | 62         | 17         | 46        | 1 | 61 | 17 | 45 | 0 | 1338.5039500 | 1338.5043852 |
|       | -0.0004352 | -0.0003000 | 0.0000000 |   |    |    |    |   |              |              |
| 5675: | 63         | 17         | 47        | 1 | 62 | 17 | 46 | 0 | 1338.7552700 | 1338.7549441 |
|       | 0.0003259  | -0.0003000 | 0.0000000 |   |    |    |    |   |              |              |
| 5676: | 64         | 17         | 48        | 1 | 63 | 17 | 47 | 0 | 1339.0048500 | 1339.0052499 |
|       | -0.0003999 | -0.0003000 | 0.0000000 |   |    |    |    |   |              |              |
| 5677: | 65         | 17         | 49        | 1 | 64 | 17 | 48 | 0 | 1339.2549800 | 1339.2553007 |
|       | -0.0003207 | -0.0003000 | 0.0000000 |   |    |    |    |   |              |              |
| 5678: | 67         | 17         | 51        | 1 | 66 | 17 | 50 | 0 | 1339.7549800 | 1339.7546288 |
|       | 0.0003512  | -0.0003000 | 0.0000000 |   |    |    |    |   |              |              |
| 5679: | 68         | 17         | 52        | 1 | 67 | 17 | 51 | 0 | 1340.0038300 | 1340.0039019 |
|       | -0.0000719 | -0.0003000 | 0.0000000 |   |    |    |    |   |              |              |
| 5680: | 69         | 17         | 53        | 1 | 68 | 17 | 52 | 0 | 1340.2527300 | 1340.2529116 |
|       | -0.0001816 | -0.0003000 | 0.0000000 |   |    |    |    |   |              |              |
| 5681: | 71         | 17         | 55        | 1 | 70 | 17 | 54 | 0 | 1340.7502000 | 1340.7501326 |
|       | 0.0000674  | -0.0003000 | 0.0000000 |   |    |    |    |   |              |              |
| 5682: | 73         | 17         | 57        | 1 | 72 | 17 | 56 | 0 | 1341.2467300 | 1341.2462746 |
|       | 0.0004554  | -0.0003000 | 0.0000000 |   |    |    |    |   |              |              |
| 5683: | 74         | 17         | 58        | 1 | 73 | 17 | 57 | 0 | 1341.4944100 | 1341.4939357 |
|       | 0.0004743  | -0.0003000 | 0.0000000 |   |    |    |    |   |              |              |
| 5684: | 75         | 17         | 59        | 1 | 74 | 17 | 58 | 0 | 1341.7413600 | 1341.7413206 |
|       | 0.0000394  | -0.0003000 | 0.0000000 |   |    |    |    |   |              |              |
| 5685: | 76         | 17         | 60        | 1 | 75 | 17 | 59 | 0 | 1341.9882400 | 1341.9884273 |

|              |            |           |    |              |
|--------------|------------|-----------|----|--------------|
| -0.0001873   | -0.0003000 | 0.0000000 |    |              |
| 5686:        | 61         | 18        | 43 | 1 62 18 44 0 |
| 1305.7194100 |            |           |    | 1305.7198083 |
| -0.0003983   | -0.0003000 | 0.0000000 |    |              |
| 5687:        | 60         | 18        | 42 | 1 61 18 43 0 |
| 1305.9869500 |            |           |    | 1305.9875020 |
| -0.0005520   | -0.0003000 | 0.0000000 |    |              |
| 5688:        | 59         | 18        | 41 | 1 60 18 42 0 |
| 1306.2552700 |            |           |    | 1306.2551664 |
| 0.0001036    | -0.0003000 | 0.0000000 |    |              |
| 5689:        | 58         | 18        | 40 | 1 59 18 41 0 |
| 1306.5226200 |            |           |    | 1306.5227999 |
| -0.0001799   | -0.0003000 | 0.0000000 |    |              |
| 5690:        | 57         | 18        | 39 | 1 58 18 40 0 |
| 1306.7905500 |            |           |    | 1306.7904007 |
| 0.0001493    | -0.0003000 | 0.0000000 |    |              |
| 5691:        | 56         | 18        | 38 | 1 57 18 39 0 |
| 1307.0581700 |            |           |    | 1307.0579672 |
| 0.0002028    | -0.0003000 | 0.0000000 |    |              |
| 5692:        | 55         | 18        | 37 | 1 56 18 38 0 |
| 1307.3257700 |            |           |    | 1307.3254975 |
| 0.0002725    | -0.0003000 | 0.0000000 |    |              |
| 5693:        | 54         | 18        | 36 | 1 55 18 37 0 |
| 1307.5930200 |            |           |    | 1307.5929901 |
| 0.0000299    | -0.0003000 | 0.0000000 |    |              |
| 5694:        | 53         | 18        | 35 | 1 54 18 36 0 |
| 1307.8597800 |            |           |    | 1307.8604432 |
| -0.0006632   | -0.0003000 | 0.0000000 |    |              |
| 5695:        | 52         | 18        | 34 | 1 53 18 35 0 |
| 1308.1274100 |            |           |    | 1308.1278551 |
| -0.0004451   | -0.0003000 | 0.0000000 |    |              |
| 5696:        | 51         | 18        | 33 | 1 52 18 34 0 |
| 1308.3949700 |            |           |    | 1308.3952240 |
| -0.0002540   | -0.0003000 | 0.0000000 |    |              |
| 5697:        | 50         | 18        | 32 | 1 51 18 33 0 |
| 1308.6626100 |            |           |    | 1308.6625483 |
| 0.0000617    | -0.0003000 | 0.0000000 |    |              |
| 5698:        | 49         | 18        | 31 | 1 50 18 32 0 |
| 1308.9299800 |            |           |    | 1308.9298263 |
| 0.0001537    | -0.0003000 | 0.0000000 |    |              |
| 5699:        | 48         | 18        | 30 | 1 49 18 31 0 |
| 1309.1973900 |            |           |    | 1309.1970562 |
| 0.0003338    | -0.0003000 | 0.0000000 |    |              |
| 5700:        | 47         | 18        | 29 | 1 48 18 30 0 |
| 1309.4645100 |            |           |    | 1309.4642362 |
| 0.0002738    | -0.0003000 | 0.0000000 |    |              |
| 5701:        | 46         | 18        | 28 | 1 47 18 29 0 |
| 1309.7321000 |            |           |    | 1309.7313648 |
| 0.0007352    | -0.0003000 | 0.0000000 |    |              |
| 5702:        | 45         | 18        | 27 | 1 46 18 28 0 |
| 1309.9985100 |            |           |    | 1309.9984401 |
| 0.0000699    | -0.0003000 | 0.0000000 |    |              |
| 5703:        | 44         | 18        | 26 | 1 45 18 27 0 |
| 1310.2650400 |            |           |    | 1310.2654604 |
| -0.0004204   | -0.0003000 | 0.0000000 |    |              |
| 5704:        | 43         | 18        | 25 | 1 44 18 26 0 |
| 1310.5327100 |            |           |    | 1310.5324241 |
| 0.0002859    | -0.0003000 | 0.0000000 |    |              |
| 5705:        | 42         | 18        | 24 | 1 43 18 25 0 |
| 1310.7994600 |            |           |    | 1310.7993293 |
| 0.0001307    | -0.0003000 | 0.0000000 |    |              |
| 5706:        | 41         | 18        | 23 | 1 42 18 24 0 |
| 1311.0667600 |            |           |    | 1311.0661744 |
| 0.0005856    | -0.0003000 | 0.0000000 |    |              |
| 5707:        | 40         | 18        | 22 | 1 41 18 23 0 |
| 1311.3335000 |            |           |    | 1311.3329576 |
| 0.0005424    | -0.0003000 | 0.0000000 |    |              |
| 5708:        | 39         | 18        | 21 | 1 40 18 22 0 |
| 1311.6002400 |            |           |    | 1311.5996771 |
| 0.0005629    | -0.0003000 | 0.0000000 |    |              |
| 5709:        | 38         | 18        | 20 | 1 39 18 21 0 |
| 1311.8666900 |            |           |    | 1311.8663314 |
| 0.0003586    | -0.0003000 | 0.0000000 |    |              |
| 5710:        | 37         | 18        | 19 | 1 38 18 20 0 |
| 1312.1327400 |            |           |    | 1312.1329185 |
| -0.0001785   | -0.0003000 | 0.0000000 |    |              |
| 5711:        | 19         | 18        | 1  | 1 18 18 0 0  |
| 1327.1609000 |            |           |    | 1327.1606057 |
| 0.0002943    | -0.0003000 | 0.0000000 |    |              |
| 5712:        | 20         | 18        | 2  | 1 19 18 1 0  |
| 1327.4199300 |            |           |    | 1327.4202966 |
| -0.0003666   | -0.0003000 | 0.0000000 |    |              |
| 5713:        | 21         | 18        | 3  | 1 20 18 2 0  |
| 1327.6798900 |            |           |    | 1327.6798158 |
| 0.0000742    | -0.0003000 | 0.0000000 |    |              |
| 5714:        | 23         | 18        | 5  | 1 22 18 4 0  |
| 1328.1983500 |            |           |    | 1328.1983321 |
| 0.0000179    | -0.0003000 | 0.0000000 |    |              |
| 5715:        | 24         | 18        | 6  | 1 23 18 5 0  |
| 1328.4574600 |            |           |    | 1328.4573254 |
| 0.0001346    | -0.0003000 | 0.0000000 |    |              |
| 5716:        | 26         | 18        | 8  | 1 25 18 7 0  |
| 1328.9751700 |            |           |    | 1328.9747731 |
| 0.0003969    | -0.0003000 | 0.0000000 |    |              |
| 5717:        | 44         | 18        | 26 | 1 43 18 25 0 |
| 1333.5969900 |            |           |    | 1333.5971104 |
| -0.0001204   | -0.0003000 | 0.0000000 |    |              |

|            |            |           |    |   |    |    |    |   |              |              |
|------------|------------|-----------|----|---|----|----|----|---|--------------|--------------|
| 5718:      | 45         | 18        | 27 | 1 | 44 | 18 | 26 | 0 | 1333.8523500 | 1333.8519496 |
| 0.0004004  | -0.0003000 | 0.0000000 |    |   |    |    |    |   |              |              |
| 5719:      | 46         | 18        | 28 | 1 | 45 | 18 | 27 | 0 | 1334.1069000 | 1334.1065698 |
| 0.0003302  | -0.0003000 | 0.0000000 |    |   |    |    |    |   |              |              |
| 5720:      | 47         | 18        | 29 | 1 | 46 | 18 | 28 | 0 | 1334.3611700 | 1334.3609691 |
| 0.0002009  | -0.0003000 | 0.0000000 |    |   |    |    |    |   |              |              |
| 5721:      | 48         | 18        | 30 | 1 | 47 | 18 | 29 | 0 | 1334.6148700 | 1334.6151456 |
| -0.0002756 | -0.0003000 | 0.0000000 |    |   |    |    |    |   |              |              |
| 5722:      | 49         | 18        | 31 | 1 | 48 | 18 | 30 | 0 | 1334.8690200 | 1334.8690973 |
| -0.0000773 | -0.0003000 | 0.0000000 |    |   |    |    |    |   |              |              |
| 5723:      | 50         | 18        | 32 | 1 | 49 | 18 | 31 | 0 | 1335.1223100 | 1335.1228222 |
| -0.0005122 | -0.0003000 | 0.0000000 |    |   |    |    |    |   |              |              |
| 5724:      | 51         | 18        | 33 | 1 | 50 | 18 | 32 | 0 | 1335.3758800 | 1335.3763182 |
| -0.0004382 | -0.0003000 | 0.0000000 |    |   |    |    |    |   |              |              |
| 5725:      | 52         | 18        | 34 | 1 | 51 | 18 | 33 | 0 | 1335.6296600 | 1335.6295835 |
| 0.0000765  | -0.0003000 | 0.0000000 |    |   |    |    |    |   |              |              |
| 5726:      | 61         | 18        | 43 | 1 | 60 | 18 | 42 | 0 | 1337.8984100 | 1337.8982510 |
| 0.0001590  | -0.0003000 | 0.0000000 |    |   |    |    |    |   |              |              |
| 5727:      | 62         | 18        | 44 | 1 | 61 | 18 | 43 | 0 | 1338.1493200 | 1338.1490965 |
| 0.0002235  | -0.0003000 | 0.0000000 |    |   |    |    |    |   |              |              |
| 5728:      | 63         | 18        | 45 | 1 | 62 | 18 | 44 | 0 | 1338.3996200 | 1338.3996888 |
| -0.0000688 | -0.0003000 | 0.0000000 |    |   |    |    |    |   |              |              |
| 5729:      | 64         | 18        | 46 | 1 | 63 | 18 | 45 | 0 | 1338.6496800 | 1338.6500256 |
| -0.0003456 | -0.0003000 | 0.0000000 |    |   |    |    |    |   |              |              |
| 5730:      | 65         | 18        | 47 | 1 | 64 | 18 | 46 | 0 | 1338.9003500 | 1338.9001050 |
| 0.0002450  | -0.0003000 | 0.0000000 |    |   |    |    |    |   |              |              |
| 5731:      | 66         | 18        | 48 | 1 | 65 | 18 | 47 | 0 | 1339.1503800 | 1339.1499247 |
| 0.0004553  | -0.0003000 | 0.0000000 |    |   |    |    |    |   |              |              |
| 5732:      | 67         | 18        | 49 | 1 | 66 | 18 | 48 | 0 | 1339.3992500 | 1339.3994826 |
| -0.0002326 | -0.0003000 | 0.0000000 |    |   |    |    |    |   |              |              |
| 5733:      | 68         | 18        | 50 | 1 | 67 | 18 | 49 | 0 | 1339.6478800 | 1339.6487767 |
| -0.0008967 | -0.0003000 | 0.0000000 |    |   |    |    |    |   |              |              |
| 5734:      | 69         | 18        | 51 | 1 | 68 | 18 | 50 | 0 | 1339.8968600 | 1339.8978047 |
| -0.0009447 | -0.0003000 | 0.0000000 |    |   |    |    |    |   |              |              |
| 5735:      | 70         | 18        | 52 | 1 | 69 | 18 | 51 | 0 | 1340.1466200 | 1340.1465645 |
| 0.0000555  | -0.0003000 | 0.0000000 |    |   |    |    |    |   |              |              |
| 5736:      | 71         | 18        | 53 | 1 | 70 | 18 | 52 | 0 | 1340.3956400 | 1340.3950539 |
| 0.0005861  | -0.0003000 | 0.0000000 |    |   |    |    |    |   |              |              |
| 5737:      | 72         | 18        | 54 | 1 | 71 | 18 | 53 | 0 | 1340.6427800 | 1340.6432709 |
| -0.0004909 | -0.0003000 | 0.0000000 |    |   |    |    |    |   |              |              |
| 5738:      | 73         | 18        | 55 | 1 | 72 | 18 | 54 | 0 | 1340.8909600 | 1340.8912131 |
| -0.0002531 | -0.0003000 | 0.0000000 |    |   |    |    |    |   |              |              |
| 5739:      | 74         | 18        | 56 | 1 | 73 | 18 | 55 | 0 | 1341.1384900 | 1341.1388784 |
| -0.0003884 | -0.0003000 | 0.0000000 |    |   |    |    |    |   |              |              |
| 5740:      | 75         | 18        | 57 | 1 | 74 | 18 | 56 | 0 | 1341.3864700 | 1341.3862645 |
| 0.0002055  | -0.0003000 | 0.0000000 |    |   |    |    |    |   |              |              |
| 5741:      | 76         | 18        | 58 | 1 | 75 | 18 | 57 | 0 | 1341.6331100 | 1341.6333694 |
| -0.0002594 | -0.0003000 | 0.0000000 |    |   |    |    |    |   |              |              |
| 5742:      | 78         | 18        | 60 | 1 | 77 | 18 | 59 | 0 | 1342.1264700 | 1342.1267261 |
| -0.0002561 | -0.0003000 | 0.0000000 |    |   |    |    |    |   |              |              |
| 5743:      | 79         | 18        | 61 | 1 | 78 | 18 | 60 | 0 | 1342.3734500 | 1342.3729736 |
| 0.0004764  | -0.0003000 | 0.0000000 |    |   |    |    |    |   |              |              |
| 5744:      | 61         | 18        | 44 | 1 | 62 | 18 | 45 | 0 | 1305.7194100 | 1305.7198083 |
| -0.0003983 | -0.0003000 | 0.0000000 |    |   |    |    |    |   |              |              |
| 5745:      | 60         | 18        | 43 | 1 | 61 | 18 | 44 | 0 | 1305.9869500 | 1305.9875020 |
| -0.0005520 | -0.0003000 | 0.0000000 |    |   |    |    |    |   |              |              |
| 5746:      | 59         | 18        | 42 | 1 | 60 | 18 | 43 | 0 | 1306.2552700 | 1306.2551664 |
| 0.0001036  | -0.0003000 | 0.0000000 |    |   |    |    |    |   |              |              |
| 5747:      | 58         | 18        | 41 | 1 | 59 | 18 | 42 | 0 | 1306.5226200 | 1306.5227999 |
| -0.0001799 | -0.0003000 | 0.0000000 |    |   |    |    |    |   |              |              |
| 5748:      | 57         | 18        | 40 | 1 | 58 | 18 | 41 | 0 | 1306.7905500 | 1306.7904007 |
| 0.0001493  | -0.0003000 | 0.0000000 |    |   |    |    |    |   |              |              |
| 5749:      | 56         | 18        | 39 | 1 | 57 | 18 | 40 | 0 | 1307.0581700 | 1307.0579672 |
| 0.0002028  | -0.0003000 | 0.0000000 |    |   |    |    |    |   |              |              |
| 5750:      | 55         | 18        | 38 | 1 | 56 | 18 | 39 | 0 | 1307.3257700 | 1307.3254975 |

|            |            |            |   |                           |
|------------|------------|------------|---|---------------------------|
| 0.0002725  | -0.0003000 | 0.0000000  |   |                           |
| 5751: 54   | 18 37      | 1 55 18 38 | 0 | 1307.5930200 1307.5929901 |
| 0.0000299  | -0.0003000 | 0.0000000  |   |                           |
| 5752: 53   | 18 36      | 1 54 18 37 | 0 | 1307.8597800 1307.8604432 |
| -0.0006632 | -0.0003000 | 0.0000000  |   |                           |
| 5753: 52   | 18 35      | 1 53 18 36 | 0 | 1308.1274100 1308.1278551 |
| -0.0004451 | -0.0003000 | 0.0000000  |   |                           |
| 5754: 51   | 18 34      | 1 52 18 35 | 0 | 1308.3949700 1308.3952240 |
| -0.0002540 | -0.0003000 | 0.0000000  |   |                           |
| 5755: 50   | 18 33      | 1 51 18 34 | 0 | 1308.6626100 1308.6625483 |
| 0.0000617  | -0.0003000 | 0.0000000  |   |                           |
| 5756: 49   | 18 32      | 1 50 18 33 | 0 | 1308.9299800 1308.9298263 |
| 0.0001537  | -0.0003000 | 0.0000000  |   |                           |
| 5757: 48   | 18 31      | 1 49 18 32 | 0 | 1309.1973900 1309.1970562 |
| 0.0003338  | -0.0003000 | 0.0000000  |   |                           |
| 5758: 47   | 18 30      | 1 48 18 31 | 0 | 1309.4645100 1309.4642362 |
| 0.0002738  | -0.0003000 | 0.0000000  |   |                           |
| 5759: 46   | 18 29      | 1 47 18 30 | 0 | 1309.7321000 1309.7313648 |
| 0.0007352  | -0.0003000 | 0.0000000  |   |                           |
| 5760: 45   | 18 28      | 1 46 18 29 | 0 | 1309.9985100 1309.9984401 |
| 0.0000699  | -0.0003000 | 0.0000000  |   |                           |
| 5761: 44   | 18 27      | 1 45 18 28 | 0 | 1310.2650400 1310.2654604 |
| -0.0004204 | -0.0003000 | 0.0000000  |   |                           |
| 5762: 43   | 18 26      | 1 44 18 27 | 0 | 1310.5327100 1310.5324241 |
| 0.0002859  | -0.0003000 | 0.0000000  |   |                           |
| 5763: 42   | 18 25      | 1 43 18 26 | 0 | 1310.7994600 1310.7993293 |
| 0.0001307  | -0.0003000 | 0.0000000  |   |                           |
| 5764: 41   | 18 24      | 1 42 18 25 | 0 | 1311.0667600 1311.0661744 |
| 0.0005856  | -0.0003000 | 0.0000000  |   |                           |
| 5765: 40   | 18 23      | 1 41 18 24 | 0 | 1311.3335000 1311.3329576 |
| 0.0005424  | -0.0003000 | 0.0000000  |   |                           |
| 5766: 39   | 18 22      | 1 40 18 23 | 0 | 1311.6002400 1311.5996771 |
| 0.0005629  | -0.0003000 | 0.0000000  |   |                           |
| 5767: 38   | 18 21      | 1 39 18 22 | 0 | 1311.8666900 1311.8663314 |
| 0.0003586  | -0.0003000 | 0.0000000  |   |                           |
| 5768: 37   | 18 20      | 1 38 18 21 | 0 | 1312.1327400 1312.1329185 |
| -0.0001785 | -0.0003000 | 0.0000000  |   |                           |
| 5769: 19   | 18 2       | 1 18 18 1  | 0 | 1327.1609000 1327.1606057 |
| 0.0002943  | -0.0003000 | 0.0000000  |   |                           |
| 5770: 20   | 18 3       | 1 19 18 2  | 0 | 1327.4199300 1327.4202966 |
| -0.0003666 | -0.0003000 | 0.0000000  |   |                           |
| 5771: 21   | 18 4       | 1 20 18 3  | 0 | 1327.6798900 1327.6798158 |
| 0.0000742  | -0.0003000 | 0.0000000  |   |                           |
| 5772: 23   | 18 6       | 1 22 18 5  | 0 | 1328.1983500 1328.1983321 |
| 0.0000179  | -0.0003000 | 0.0000000  |   |                           |
| 5773: 24   | 18 7       | 1 23 18 6  | 0 | 1328.4574600 1328.4573254 |
| 0.0001346  | -0.0003000 | 0.0000000  |   |                           |
| 5774: 26   | 18 9       | 1 25 18 8  | 0 | 1328.9751700 1328.9747731 |
| 0.0003969  | -0.0003000 | 0.0000000  |   |                           |
| 5775: 44   | 18 27      | 1 43 18 26 | 0 | 1333.5969900 1333.5971104 |
| -0.0001204 | -0.0003000 | 0.0000000  |   |                           |
| 5776: 45   | 18 28      | 1 44 18 27 | 0 | 1333.8523500 1333.8519496 |
| 0.0004004  | -0.0003000 | 0.0000000  |   |                           |
| 5777: 46   | 18 29      | 1 45 18 28 | 0 | 1334.1069000 1334.1065698 |
| 0.0003302  | -0.0003000 | 0.0000000  |   |                           |
| 5778: 47   | 18 30      | 1 46 18 29 | 0 | 1334.3611700 1334.3609691 |
| 0.0002009  | -0.0003000 | 0.0000000  |   |                           |
| 5779: 48   | 18 31      | 1 47 18 30 | 0 | 1334.6148700 1334.6151456 |
| -0.0002756 | -0.0003000 | 0.0000000  |   |                           |
| 5780: 49   | 18 32      | 1 48 18 31 | 0 | 1334.8690200 1334.8690973 |
| -0.0000773 | -0.0003000 | 0.0000000  |   |                           |
| 5781: 50   | 18 33      | 1 49 18 32 | 0 | 1335.1223100 1335.1228222 |
| -0.0005122 | -0.0003000 | 0.0000000  |   |                           |
| 5782: 51   | 18 34      | 1 50 18 33 | 0 | 1335.3758800 1335.3763182 |
| -0.0004382 | -0.0003000 | 0.0000000  |   |                           |

|       |            |            |           |   |    |    |    |   |              |              |
|-------|------------|------------|-----------|---|----|----|----|---|--------------|--------------|
| 5783: | 52         | 18         | 35        | 1 | 51 | 18 | 34 | 0 | 1335.6296600 | 1335.6295835 |
|       | 0.0000765  | -0.0003000 | 0.0000000 |   |    |    |    |   |              |              |
| 5784: | 61         | 18         | 44        | 1 | 60 | 18 | 43 | 0 | 1337.8984100 | 1337.8982510 |
|       | 0.0001590  | -0.0003000 | 0.0000000 |   |    |    |    |   |              |              |
| 5785: | 62         | 18         | 45        | 1 | 61 | 18 | 44 | 0 | 1338.1493200 | 1338.1490965 |
|       | 0.0002235  | -0.0003000 | 0.0000000 |   |    |    |    |   |              |              |
| 5786: | 63         | 18         | 46        | 1 | 62 | 18 | 45 | 0 | 1338.3996200 | 1338.3996888 |
|       | -0.0000688 | -0.0003000 | 0.0000000 |   |    |    |    |   |              |              |
| 5787: | 64         | 18         | 47        | 1 | 63 | 18 | 46 | 0 | 1338.6496800 | 1338.6500256 |
|       | -0.0003456 | -0.0003000 | 0.0000000 |   |    |    |    |   |              |              |
| 5788: | 65         | 18         | 48        | 1 | 64 | 18 | 47 | 0 | 1338.9003500 | 1338.9001050 |
|       | 0.0002450  | -0.0003000 | 0.0000000 |   |    |    |    |   |              |              |
| 5789: | 66         | 18         | 49        | 1 | 65 | 18 | 48 | 0 | 1339.1503800 | 1339.1499247 |
|       | 0.0004553  | -0.0003000 | 0.0000000 |   |    |    |    |   |              |              |
| 5790: | 67         | 18         | 50        | 1 | 66 | 18 | 49 | 0 | 1339.3992500 | 1339.3994826 |
|       | -0.0002326 | -0.0003000 | 0.0000000 |   |    |    |    |   |              |              |
| 5791: | 68         | 18         | 51        | 1 | 67 | 18 | 50 | 0 | 1339.6478800 | 1339.6487767 |
|       | -0.0008967 | -0.0003000 | 0.0000000 |   |    |    |    |   |              |              |
| 5792: | 69         | 18         | 52        | 1 | 68 | 18 | 51 | 0 | 1339.8968600 | 1339.8978047 |
|       | -0.0009447 | -0.0003000 | 0.0000000 |   |    |    |    |   |              |              |
| 5793: | 70         | 18         | 53        | 1 | 69 | 18 | 52 | 0 | 1340.1466200 | 1340.1465645 |
|       | 0.0000555  | -0.0003000 | 0.0000000 |   |    |    |    |   |              |              |
| 5794: | 71         | 18         | 54        | 1 | 70 | 18 | 53 | 0 | 1340.3956400 | 1340.3950539 |
|       | 0.0005861  | -0.0003000 | 0.0000000 |   |    |    |    |   |              |              |
| 5795: | 72         | 18         | 55        | 1 | 71 | 18 | 54 | 0 | 1340.6427800 | 1340.6432709 |
|       | -0.0004909 | -0.0003000 | 0.0000000 |   |    |    |    |   |              |              |
| 5796: | 73         | 18         | 56        | 1 | 72 | 18 | 55 | 0 | 1340.8909600 | 1340.8912131 |
|       | -0.0002531 | -0.0003000 | 0.0000000 |   |    |    |    |   |              |              |
| 5797: | 74         | 18         | 57        | 1 | 73 | 18 | 56 | 0 | 1341.1384900 | 1341.1388784 |
|       | -0.0003884 | -0.0003000 | 0.0000000 |   |    |    |    |   |              |              |
| 5798: | 75         | 18         | 58        | 1 | 74 | 18 | 57 | 0 | 1341.3864700 | 1341.3862645 |
|       | 0.0002055  | -0.0003000 | 0.0000000 |   |    |    |    |   |              |              |
| 5799: | 76         | 18         | 59        | 1 | 75 | 18 | 58 | 0 | 1341.6331100 | 1341.6333694 |
|       | -0.0002594 | -0.0003000 | 0.0000000 |   |    |    |    |   |              |              |
| 5800: | 78         | 18         | 61        | 1 | 77 | 18 | 60 | 0 | 1342.1264700 | 1342.1267261 |
|       | -0.0002561 | -0.0003000 | 0.0000000 |   |    |    |    |   |              |              |
| 5801: | 79         | 18         | 62        | 1 | 78 | 18 | 61 | 0 | 1342.3734500 | 1342.3729736 |
|       | 0.0004764  | -0.0003000 | 0.0000000 |   |    |    |    |   |              |              |
| 5802: | 75         | 19         | 56        | 1 | 76 | 19 | 57 | 0 | 1301.5881600 | 1301.5879441 |
|       | 0.0002159  | -0.0003000 | 0.0000000 |   |    |    |    |   |              |              |
| 5803: | 74         | 19         | 55        | 1 | 75 | 19 | 56 | 0 | 1301.8557800 | 1301.8558643 |
|       | -0.0000843 | -0.0003000 | 0.0000000 |   |    |    |    |   |              |              |
| 5804: | 73         | 19         | 54        | 1 | 74 | 19 | 55 | 0 | 1302.1237800 | 1302.1237796 |
|       | 0.0000004  | -0.0003000 | 0.0000000 |   |    |    |    |   |              |              |
| 5805: | 72         | 19         | 53        | 1 | 73 | 19 | 54 | 0 | 1302.3921200 | 1302.3916884 |
|       | 0.0004316  | -0.0003000 | 0.0000000 |   |    |    |    |   |              |              |
| 5806: | 68         | 19         | 49        | 1 | 69 | 19 | 50 | 0 | 1303.4633000 | 1303.4632264 |
|       | 0.0000736  | -0.0003000 | 0.0000000 |   |    |    |    |   |              |              |
| 5807: | 67         | 19         | 48        | 1 | 68 | 19 | 49 | 0 | 1303.7306600 | 1303.7310783 |
|       | -0.0004183 | -0.0003000 | 0.0000000 |   |    |    |    |   |              |              |
| 5808: | 66         | 19         | 47        | 1 | 67 | 19 | 48 | 0 | 1303.9988900 | 1303.9989138 |
|       | -0.0000238 | -0.0003000 | 0.0000000 |   |    |    |    |   |              |              |
| 5809: | 65         | 19         | 46        | 1 | 66 | 19 | 47 | 0 | 1304.2663700 | 1304.2667312 |
|       | -0.0003612 | -0.0003000 | 0.0000000 |   |    |    |    |   |              |              |
| 5810: | 64         | 19         | 45        | 1 | 65 | 19 | 46 | 0 | 1304.5341400 | 1304.5345290 |
|       | -0.0003890 | -0.0003000 | 0.0000000 |   |    |    |    |   |              |              |
| 5811: | 63         | 19         | 44        | 1 | 64 | 19 | 45 | 0 | 1304.8026400 | 1304.8023054 |
|       | 0.0003346  | -0.0003000 | 0.0000000 |   |    |    |    |   |              |              |
| 5812: | 62         | 19         | 43        | 1 | 63 | 19 | 44 | 0 | 1305.0702700 | 1305.0700588 |
|       | 0.0002112  | -0.0003000 | 0.0000000 |   |    |    |    |   |              |              |
| 5813: | 61         | 19         | 42        | 1 | 62 | 19 | 43 | 0 | 1305.3376100 | 1305.3377874 |
|       | -0.0001774 | -0.0003000 | 0.0000000 |   |    |    |    |   |              |              |
| 5814: | 60         | 19         | 41        | 1 | 61 | 19 | 42 | 0 | 1305.6055200 | 1305.6054896 |
|       | 0.0000304  | -0.0003000 | 0.0000000 |   |    |    |    |   |              |              |
| 5815: | 58         | 19         | 39        | 1 | 59 | 19 | 40 | 0 | 1306.1398400 | 1306.1408081 |

|            |            |           |              |              |
|------------|------------|-----------|--------------|--------------|
| -0.0009681 | -0.0003000 | 0.0000000 |              |              |
| 5816:      | 57         | 19        | 38           | 1 58 19 39 0 |
| -0.0010011 | -0.0003000 | 0.0000000 | 1306.4074200 | 1306.4084211 |
| 5817:      | 56         | 19        | 37           | 1 57 19 38 0 |
| -0.0003008 | -0.0003000 | 0.0000000 | 1306.6757000 | 1306.6760008 |
| 5818:      | 55         | 19        | 36           | 1 56 19 37 0 |
| -0.0000357 | -0.0003000 | 0.0000000 | 1306.9435100 | 1306.9435457 |
| 5819:      | 54         | 19        | 35           | 1 55 19 36 0 |
| -0.0003941 | -0.0003000 | 0.0000000 | 1307.2106600 | 1307.2110541 |
| 5820:      | 53         | 19        | 34           | 1 54 19 35 0 |
| -0.0008042 | -0.0003000 | 0.0000000 | 1307.4777200 | 1307.4785242 |
| 5821:      | 52         | 19        | 33           | 1 53 19 34 0 |
| -0.0001944 | -0.0003000 | 0.0000000 | 1307.7457600 | 1307.7459544 |
| 5822:      | 51         | 19        | 32           | 1 52 19 33 0 |
| 0.0002171  | -0.0003000 | 0.0000000 | 1308.0135600 | 1308.0133429 |
| 5823:      | 50         | 19        | 31           | 1 51 19 32 0 |
| -0.0004281 | -0.0003000 | 0.0000000 | 1308.2802600 | 1308.2806881 |
| 5824:      | 49         | 19        | 30           | 1 50 19 31 0 |
| -0.0003482 | -0.0003000 | 0.0000000 | 1308.5476400 | 1308.5479882 |
| 5825:      | 48         | 19        | 29           | 1 49 19 30 0 |
| -0.0002115 | -0.0003000 | 0.0000000 | 1308.8150300 | 1308.8152415 |
| 5826:      | 47         | 19        | 28           | 1 48 19 29 0 |
| -0.0000064 | -0.0003000 | 0.0000000 | 1309.0824400 | 1309.0824464 |
| 5827:      | 46         | 19        | 27           | 1 47 19 28 0 |
| -0.0003410 | -0.0003000 | 0.0000000 | 1309.3492600 | 1309.3496010 |
| 5828:      | 44         | 19        | 25           | 1 45 19 26 0 |
| 0.0001673  | -0.0003000 | 0.0000000 | 1309.8839200 | 1309.8837527 |
| 5829:      | 43         | 19        | 24           | 1 44 19 25 0 |
| 0.0003936  | -0.0003000 | 0.0000000 | 1310.1511400 | 1310.1507464 |
| 5830:      | 42         | 19        | 23           | 1 43 19 24 0 |
| -0.0000430 | -0.0003000 | 0.0000000 | 1310.4176400 | 1310.4176830 |
| 5831:      | 41         | 19        | 22           | 1 42 19 23 0 |
| -0.0003607 | -0.0003000 | 0.0000000 | 1310.6842000 | 1310.6845607 |
| 5832:      | 40         | 19        | 21           | 1 41 19 22 0 |
| 0.0001521  | -0.0003000 | 0.0000000 | 1310.9515300 | 1310.9513779 |
| 5833:      | 39         | 19        | 20           | 1 40 19 21 0 |
| 0.0001172  | -0.0003000 | 0.0000000 | 1311.2182500 | 1311.2181328 |
| 5834:      | 38         | 19        | 19           | 1 39 19 20 0 |
| 0.0001363  | -0.0003000 | 0.0000000 | 1311.4849600 | 1311.4848237 |
| 5835:      | 37         | 19        | 18           | 1 38 19 19 0 |
| 0.0002812  | -0.0003000 | 0.0000000 | 1311.7517300 | 1311.7514488 |
| 5836:      | 36         | 19        | 17           | 1 37 19 18 0 |
| 0.0003335  | -0.0003000 | 0.0000000 | 1312.0183400 | 1312.0180065 |
| 5837:      | 35         | 19        | 16           | 1 36 19 17 0 |
| 0.0002151  | -0.0003000 | 0.0000000 | 1312.2847100 | 1312.2844949 |
| 5838:      | 34         | 19        | 15           | 1 35 19 16 0 |
| -0.0002224 | -0.0003000 | 0.0000000 | 1312.5506900 | 1312.5509124 |
| 5839:      | 33         | 19        | 14           | 1 34 19 15 0 |
| -0.0005071 | -0.0003000 | 0.0000000 | 1312.8167500 | 1312.8172571 |
| 5840:      | 32         | 19        | 13           | 1 33 19 14 0 |
| -0.0003874 | -0.0003000 | 0.0000000 | 1313.0831400 | 1313.0835274 |
| 5841:      | 31         | 19        | 12           | 1 32 19 13 0 |
| -0.0000215 | -0.0003000 | 0.0000000 | 1313.3497000 | 1313.3497215 |
| 5842:      | 30         | 19        | 11           | 1 31 19 12 0 |
| 0.0001523  | -0.0003000 | 0.0000000 | 1313.6159900 | 1313.6158377 |
| 5843:      | 29         | 19        | 10           | 1 30 19 11 0 |
| -0.0004041 | -0.0003000 | 0.0000000 | 1313.8814700 | 1313.8818741 |
| 5844:      | 28         | 19        | 9            | 1 29 19 10 0 |
| 0.0001408  | -0.0003000 | 0.0000000 | 1314.1479700 | 1314.1478292 |
| 5845:      | 27         | 19        | 8            | 1 28 19 9 0  |
| 0.0000690  | -0.0003000 | 0.0000000 | 1314.4137700 | 1314.4137010 |
| 5846:      | 26         | 19        | 7            | 1 27 19 8 0  |
| 0.0002322  | -0.0003000 | 0.0000000 | 1314.6797200 | 1314.6794878 |
| 5847:      | 24         | 19        | 5            | 1 25 19 6 0  |
| -0.0002897 | -0.0003000 | 0.0000000 | 1315.2105100 | 1315.2107997 |

|            |            |           |    |   |    |    |    |   |              |              |
|------------|------------|-----------|----|---|----|----|----|---|--------------|--------------|
| 5848:      | 23         | 19        | 4  | 1 | 24 | 19 | 5  | 0 | 1315.4763000 | 1315.4763212 |
| -0.0000212 | -0.0003000 | 0.0000000 |    |   |    |    |    |   |              |              |
| 5849:      | 22         | 19        | 3  | 1 | 23 | 19 | 4  | 0 | 1315.7415600 | 1315.7417507 |
| -0.0001907 | -0.0003000 | 0.0000000 |    |   |    |    |    |   |              |              |
| 5850:      | 24         | 19        | 5  | 1 | 23 | 19 | 4  | 0 | 1328.0796500 | 1328.0802913 |
| -0.0006413 | -0.0003000 | 0.0000000 |    |   |    |    |    |   |              |              |
| 5851:      | 25         | 19        | 6  | 1 | 24 | 19 | 5  | 0 | 1328.3390400 | 1328.3391950 |
| -0.0001550 | -0.0003000 | 0.0000000 |    |   |    |    |    |   |              |              |
| 5852:      | 26         | 19        | 7  | 1 | 25 | 19 | 6  | 0 | 1328.5979100 | 1328.5979176 |
| -0.0000076 | -0.0003000 | 0.0000000 |    |   |    |    |    |   |              |              |
| 5853:      | 27         | 19        | 8  | 1 | 26 | 19 | 7  | 0 | 1328.8559400 | 1328.8564574 |
| -0.0005174 | -0.0003000 | 0.0000000 |    |   |    |    |    |   |              |              |
| 5854:      | 30         | 19        | 11 | 1 | 29 | 19 | 10 | 0 | 1329.6305000 | 1329.6309602 |
| -0.0004602 | -0.0003000 | 0.0000000 |    |   |    |    |    |   |              |              |
| 5855:      | 31         | 19        | 12 | 1 | 30 | 19 | 11 | 0 | 1329.8882500 | 1329.8887493 |
| -0.0004993 | -0.0003000 | 0.0000000 |    |   |    |    |    |   |              |              |
| 5856:      | 32         | 19        | 13 | 1 | 31 | 19 | 12 | 0 | 1330.1466100 | 1330.1463460 |
| 0.0002640  | -0.0003000 | 0.0000000 |    |   |    |    |    |   |              |              |
| 5857:      | 33         | 19        | 14 | 1 | 32 | 19 | 13 | 0 | 1330.4033000 | 1330.4037483 |
| -0.0004483 | -0.0003000 | 0.0000000 |    |   |    |    |    |   |              |              |
| 5858:      | 34         | 19        | 15 | 1 | 33 | 19 | 14 | 0 | 1330.6609300 | 1330.6609543 |
| -0.0000243 | -0.0003000 | 0.0000000 |    |   |    |    |    |   |              |              |
| 5859:      | 35         | 19        | 16 | 1 | 34 | 19 | 15 | 0 | 1330.9174000 | 1330.9179620 |
| -0.0005620 | -0.0003000 | 0.0000000 |    |   |    |    |    |   |              |              |
| 5860:      | 36         | 19        | 17 | 1 | 35 | 19 | 16 | 0 | 1331.1750400 | 1331.1747696 |
| 0.0002704  | -0.0003000 | 0.0000000 |    |   |    |    |    |   |              |              |
| 5861:      | 37         | 19        | 18 | 1 | 36 | 19 | 17 | 0 | 1331.4313000 | 1331.4313750 |
| -0.0000750 | -0.0003000 | 0.0000000 |    |   |    |    |    |   |              |              |
| 5862:      | 38         | 19        | 19 | 1 | 37 | 19 | 18 | 0 | 1331.6877200 | 1331.6877764 |
| -0.0000564 | -0.0003000 | 0.0000000 |    |   |    |    |    |   |              |              |
| 5863:      | 40         | 19        | 21 | 1 | 39 | 19 | 20 | 0 | 1332.1999800 | 1332.1999589 |
| 0.0000211  | -0.0003000 | 0.0000000 |    |   |    |    |    |   |              |              |
| 5864:      | 41         | 19        | 22 | 1 | 40 | 19 | 21 | 0 | 1332.4557500 | 1332.4557363 |
| 0.0000137  | -0.0003000 | 0.0000000 |    |   |    |    |    |   |              |              |
| 5865:      | 42         | 19        | 23 | 1 | 41 | 19 | 22 | 0 | 1332.7110400 | 1332.7113016 |
| -0.0002616 | -0.0003000 | 0.0000000 |    |   |    |    |    |   |              |              |
| 5866:      | 43         | 19        | 24 | 1 | 42 | 19 | 23 | 0 | 1332.9670100 | 1332.9666530 |
| 0.0003570  | -0.0003000 | 0.0000000 |    |   |    |    |    |   |              |              |
| 5867:      | 44         | 19        | 25 | 1 | 43 | 19 | 24 | 0 | 1333.2214100 | 1333.2217885 |
| -0.0003785 | -0.0003000 | 0.0000000 |    |   |    |    |    |   |              |              |
| 5868:      | 46         | 19        | 27 | 1 | 45 | 19 | 26 | 0 | 1333.7311300 | 1333.7314037 |
| -0.0002737 | -0.0003000 | 0.0000000 |    |   |    |    |    |   |              |              |
| 5869:      | 48         | 19        | 29 | 1 | 47 | 19 | 28 | 0 | 1334.2402100 | 1334.2401312 |
| 0.0000788  | -0.0003000 | 0.0000000 |    |   |    |    |    |   |              |              |
| 5870:      | 49         | 19        | 30 | 1 | 48 | 19 | 29 | 0 | 1334.4941700 | 1334.4941570 |
| 0.0000130  | -0.0003000 | 0.0000000 |    |   |    |    |    |   |              |              |
| 5871:      | 50         | 19        | 31 | 1 | 49 | 19 | 30 | 0 | 1334.7480800 | 1334.7479548 |
| 0.0001252  | -0.0003000 | 0.0000000 |    |   |    |    |    |   |              |              |
| 5872:      | 51         | 19        | 32 | 1 | 50 | 19 | 31 | 0 | 1335.0012700 | 1335.0015225 |
| -0.0002525 | -0.0003000 | 0.0000000 |    |   |    |    |    |   |              |              |
| 5873:      | 52         | 19        | 33 | 1 | 51 | 19 | 32 | 0 | 1335.2552500 | 1335.2548582 |
| 0.0003918  | -0.0003000 | 0.0000000 |    |   |    |    |    |   |              |              |
| 5874:      | 53         | 19        | 34 | 1 | 52 | 19 | 33 | 0 | 1335.5075400 | 1335.5079597 |
| -0.0004197 | -0.0003000 | 0.0000000 |    |   |    |    |    |   |              |              |
| 5875:      | 54         | 19        | 35 | 1 | 53 | 19 | 34 | 0 | 1335.7604000 | 1335.7608250 |
| -0.0004250 | -0.0003000 | 0.0000000 |    |   |    |    |    |   |              |              |
| 5876:      | 55         | 19        | 36 | 1 | 54 | 19 | 35 | 0 | 1336.0136900 | 1336.0134520 |
| 0.0002380  | -0.0003000 | 0.0000000 |    |   |    |    |    |   |              |              |
| 5877:      | 56         | 19        | 37 | 1 | 55 | 19 | 36 | 0 | 1336.2658700 | 1336.2658387 |
| 0.0000313  | -0.0003000 | 0.0000000 |    |   |    |    |    |   |              |              |
| 5878:      | 57         | 19        | 38 | 1 | 56 | 19 | 37 | 0 | 1336.5177300 | 1336.5179830 |
| -0.0002530 | -0.0003000 | 0.0000000 |    |   |    |    |    |   |              |              |
| 5879:      | 58         | 19        | 39 | 1 | 57 | 19 | 38 | 0 | 1336.7691000 | 1336.7698828 |
| -0.0007828 | -0.0003000 | 0.0000000 |    |   |    |    |    |   |              |              |
| 5880:      | 59         | 19        | 40 | 1 | 58 | 19 | 39 | 0 | 1337.0217200 | 1337.0215359 |

|            |            |            |   |                           |
|------------|------------|------------|---|---------------------------|
| 0.0001841  | -0.0003000 | 0.0000000  |   |                           |
| 5881: 60   | 19 41      | 1 59 19 40 | 0 | 1337.2727100 1337.2729403 |
| -0.0002303 | -0.0003000 | 0.0000000  |   |                           |
| 5882: 61   | 19 42      | 1 60 19 41 | 0 | 1337.5235600 1337.5240939 |
| -0.0005339 | -0.0003000 | 0.0000000  |   |                           |
| 5883: 62   | 19 43      | 1 61 19 42 | 0 | 1337.7753100 1337.7749945 |
| 0.0003155  | -0.0003000 | 0.0000000  |   |                           |
| 5884: 65   | 19 46      | 1 64 19 45 | 0 | 1338.5262300 1338.5261572 |
| 0.0000728  | -0.0003000 | 0.0000000  |   |                           |
| 5885: 66   | 19 47      | 1 65 19 46 | 0 | 1338.7764500 1338.7760245 |
| 0.0004255  | -0.0003000 | 0.0000000  |   |                           |
| 5886: 67   | 19 48      | 1 66 19 47 | 0 | 1339.0254200 1339.0256281 |
| -0.0002081 | -0.0003000 | 0.0000000  |   |                           |
| 5887: 70   | 19 51      | 1 69 19 50 | 0 | 1339.7725400 1339.7728346 |
| -0.0002946 | -0.0003000 | 0.0000000  |   |                           |
| 5888: 71   | 19 52      | 1 70 19 51 | 0 | 1340.0211700 1340.0213614 |
| -0.0001914 | -0.0003000 | 0.0000000  |   |                           |
| 5889: 72   | 19 53      | 1 71 19 52 | 0 | 1340.2693300 1340.2696134 |
| -0.0002834 | -0.0003000 | 0.0000000  |   |                           |
| 5890: 75   | 19 57      | 1 76 19 58 | 0 | 1301.5881600 1301.5879441 |
| 0.0002159  | -0.0003000 | 0.0000000  |   |                           |
| 5891: 74   | 19 56      | 1 75 19 57 | 0 | 1301.8557800 1301.8558643 |
| -0.0000843 | -0.0003000 | 0.0000000  |   |                           |
| 5892: 73   | 19 55      | 1 74 19 56 | 0 | 1302.1237800 1302.1237796 |
| 0.0000004  | -0.0003000 | 0.0000000  |   |                           |
| 5893: 72   | 19 54      | 1 73 19 55 | 0 | 1302.3921200 1302.3916884 |
| 0.0004316  | -0.0003000 | 0.0000000  |   |                           |
| 5894: 68   | 19 50      | 1 69 19 51 | 0 | 1303.4633000 1303.4632264 |
| 0.0000736  | -0.0003000 | 0.0000000  |   |                           |
| 5895: 67   | 19 49      | 1 68 19 50 | 0 | 1303.7306600 1303.7310783 |
| -0.0004183 | -0.0003000 | 0.0000000  |   |                           |
| 5896: 66   | 19 48      | 1 67 19 49 | 0 | 1303.9988900 1303.9989138 |
| -0.0000238 | -0.0003000 | 0.0000000  |   |                           |
| 5897: 65   | 19 47      | 1 66 19 48 | 0 | 1304.2663700 1304.2667312 |
| -0.0003612 | -0.0003000 | 0.0000000  |   |                           |
| 5898: 64   | 19 46      | 1 65 19 47 | 0 | 1304.5341400 1304.5345290 |
| -0.0003890 | -0.0003000 | 0.0000000  |   |                           |
| 5899: 63   | 19 45      | 1 64 19 46 | 0 | 1304.8026400 1304.8023054 |
| 0.0003346  | -0.0003000 | 0.0000000  |   |                           |
| 5900: 62   | 19 44      | 1 63 19 45 | 0 | 1305.0702700 1305.0700588 |
| 0.0002112  | -0.0003000 | 0.0000000  |   |                           |
| 5901: 61   | 19 43      | 1 62 19 44 | 0 | 1305.3376100 1305.3377874 |
| -0.0001774 | -0.0003000 | 0.0000000  |   |                           |
| 5902: 60   | 19 42      | 1 61 19 43 | 0 | 1305.6055200 1305.6054896 |
| 0.0000304  | -0.0003000 | 0.0000000  |   |                           |
| 5903: 58   | 19 40      | 1 59 19 41 | 0 | 1306.1398400 1306.1408081 |
| -0.0009681 | -0.0003000 | 0.0000000  |   |                           |
| 5904: 57   | 19 39      | 1 58 19 40 | 0 | 1306.4074200 1306.4084211 |
| -0.0010011 | -0.0003000 | 0.0000000  |   |                           |
| 5905: 56   | 19 38      | 1 57 19 39 | 0 | 1306.6757000 1306.6760008 |
| -0.0003008 | -0.0003000 | 0.0000000  |   |                           |
| 5906: 55   | 19 37      | 1 56 19 38 | 0 | 1306.9435100 1306.9435457 |
| -0.0000357 | -0.0003000 | 0.0000000  |   |                           |
| 5907: 54   | 19 36      | 1 55 19 37 | 0 | 1307.2106600 1307.2110541 |
| -0.0003941 | -0.0003000 | 0.0000000  |   |                           |
| 5908: 53   | 19 35      | 1 54 19 36 | 0 | 1307.4777200 1307.4785242 |
| -0.0008042 | -0.0003000 | 0.0000000  |   |                           |
| 5909: 52   | 19 34      | 1 53 19 35 | 0 | 1307.7457600 1307.7459544 |
| -0.0001944 | -0.0003000 | 0.0000000  |   |                           |
| 5910: 51   | 19 33      | 1 52 19 34 | 0 | 1308.0135600 1308.0133429 |
| 0.0002171  | -0.0003000 | 0.0000000  |   |                           |
| 5911: 50   | 19 32      | 1 51 19 33 | 0 | 1308.2802600 1308.2806881 |
| -0.0004281 | -0.0003000 | 0.0000000  |   |                           |
| 5912: 49   | 19 31      | 1 50 19 32 | 0 | 1308.5476400 1308.5479882 |
| -0.0003482 | -0.0003000 | 0.0000000  |   |                           |

|            |            |           |    |   |    |    |    |   |              |              |
|------------|------------|-----------|----|---|----|----|----|---|--------------|--------------|
| 5913:      | 48         | 19        | 30 | 1 | 49 | 19 | 31 | 0 | 1308.8150300 | 1308.8152415 |
| -0.0002115 | -0.0003000 | 0.0000000 |    |   |    |    |    |   |              |              |
| 5914:      | 47         | 19        | 29 | 1 | 48 | 19 | 30 | 0 | 1309.0824400 | 1309.0824464 |
| -0.0000064 | -0.0003000 | 0.0000000 |    |   |    |    |    |   |              |              |
| 5915:      | 46         | 19        | 28 | 1 | 47 | 19 | 29 | 0 | 1309.3492600 | 1309.3496010 |
| -0.0003410 | -0.0003000 | 0.0000000 |    |   |    |    |    |   |              |              |
| 5916:      | 44         | 19        | 26 | 1 | 45 | 19 | 27 | 0 | 1309.8839200 | 1309.8837527 |
| 0.0001673  | -0.0003000 | 0.0000000 |    |   |    |    |    |   |              |              |
| 5917:      | 43         | 19        | 25 | 1 | 44 | 19 | 26 | 0 | 1310.1511400 | 1310.1507464 |
| 0.0003936  | -0.0003000 | 0.0000000 |    |   |    |    |    |   |              |              |
| 5918:      | 42         | 19        | 24 | 1 | 43 | 19 | 25 | 0 | 1310.4176400 | 1310.4176830 |
| -0.0000430 | -0.0003000 | 0.0000000 |    |   |    |    |    |   |              |              |
| 5919:      | 41         | 19        | 23 | 1 | 42 | 19 | 24 | 0 | 1310.6842000 | 1310.6845607 |
| -0.0003607 | -0.0003000 | 0.0000000 |    |   |    |    |    |   |              |              |
| 5920:      | 40         | 19        | 22 | 1 | 41 | 19 | 23 | 0 | 1310.9515300 | 1310.9513779 |
| 0.0001521  | -0.0003000 | 0.0000000 |    |   |    |    |    |   |              |              |
| 5921:      | 39         | 19        | 21 | 1 | 40 | 19 | 22 | 0 | 1311.2182500 | 1311.2181328 |
| 0.0001172  | -0.0003000 | 0.0000000 |    |   |    |    |    |   |              |              |
| 5922:      | 38         | 19        | 20 | 1 | 39 | 19 | 21 | 0 | 1311.4849600 | 1311.4848237 |
| 0.0001363  | -0.0003000 | 0.0000000 |    |   |    |    |    |   |              |              |
| 5923:      | 37         | 19        | 19 | 1 | 38 | 19 | 20 | 0 | 1311.7517300 | 1311.7514488 |
| 0.0002812  | -0.0003000 | 0.0000000 |    |   |    |    |    |   |              |              |
| 5924:      | 36         | 19        | 18 | 1 | 37 | 19 | 19 | 0 | 1312.0183400 | 1312.0180065 |
| 0.0003335  | -0.0003000 | 0.0000000 |    |   |    |    |    |   |              |              |
| 5925:      | 35         | 19        | 17 | 1 | 36 | 19 | 18 | 0 | 1312.2847100 | 1312.2844949 |
| 0.0002151  | -0.0003000 | 0.0000000 |    |   |    |    |    |   |              |              |
| 5926:      | 34         | 19        | 16 | 1 | 35 | 19 | 17 | 0 | 1312.5506900 | 1312.5509124 |
| -0.0002224 | -0.0003000 | 0.0000000 |    |   |    |    |    |   |              |              |
| 5927:      | 33         | 19        | 15 | 1 | 34 | 19 | 16 | 0 | 1312.8167500 | 1312.8172571 |
| -0.0005071 | -0.0003000 | 0.0000000 |    |   |    |    |    |   |              |              |
| 5928:      | 32         | 19        | 14 | 1 | 33 | 19 | 15 | 0 | 1313.0831400 | 1313.0835274 |
| -0.0003874 | -0.0003000 | 0.0000000 |    |   |    |    |    |   |              |              |
| 5929:      | 31         | 19        | 13 | 1 | 32 | 19 | 14 | 0 | 1313.3497000 | 1313.3497215 |
| -0.0000215 | -0.0003000 | 0.0000000 |    |   |    |    |    |   |              |              |
| 5930:      | 30         | 19        | 12 | 1 | 31 | 19 | 13 | 0 | 1313.6159900 | 1313.6158377 |
| 0.0001523  | -0.0003000 | 0.0000000 |    |   |    |    |    |   |              |              |
| 5931:      | 29         | 19        | 11 | 1 | 30 | 19 | 12 | 0 | 1313.8814700 | 1313.8818741 |
| -0.0004041 | -0.0003000 | 0.0000000 |    |   |    |    |    |   |              |              |
| 5932:      | 28         | 19        | 10 | 1 | 29 | 19 | 11 | 0 | 1314.1479700 | 1314.1478292 |
| 0.0001408  | -0.0003000 | 0.0000000 |    |   |    |    |    |   |              |              |
| 5933:      | 27         | 19        | 9  | 1 | 28 | 19 | 10 | 0 | 1314.4137700 | 1314.4137010 |
| 0.0000690  | -0.0003000 | 0.0000000 |    |   |    |    |    |   |              |              |
| 5934:      | 26         | 19        | 8  | 1 | 27 | 19 | 9  | 0 | 1314.6797200 | 1314.6794878 |
| 0.0002322  | -0.0003000 | 0.0000000 |    |   |    |    |    |   |              |              |
| 5935:      | 24         | 19        | 6  | 1 | 25 | 19 | 7  | 0 | 1315.2105100 | 1315.2107997 |
| -0.0002897 | -0.0003000 | 0.0000000 |    |   |    |    |    |   |              |              |
| 5936:      | 23         | 19        | 5  | 1 | 24 | 19 | 6  | 0 | 1315.4763000 | 1315.4763212 |
| -0.0000212 | -0.0003000 | 0.0000000 |    |   |    |    |    |   |              |              |
| 5937:      | 22         | 19        | 4  | 1 | 23 | 19 | 5  | 0 | 1315.7415600 | 1315.7417507 |
| -0.0001907 | -0.0003000 | 0.0000000 |    |   |    |    |    |   |              |              |
| 5938:      | 24         | 19        | 6  | 1 | 23 | 19 | 5  | 0 | 1328.0796500 | 1328.0802913 |
| -0.0006413 | -0.0003000 | 0.0000000 |    |   |    |    |    |   |              |              |
| 5939:      | 25         | 19        | 7  | 1 | 24 | 19 | 6  | 0 | 1328.3390400 | 1328.3391950 |
| -0.0001550 | -0.0003000 | 0.0000000 |    |   |    |    |    |   |              |              |
| 5940:      | 26         | 19        | 8  | 1 | 25 | 19 | 7  | 0 | 1328.5979100 | 1328.5979176 |
| -0.0000076 | -0.0003000 | 0.0000000 |    |   |    |    |    |   |              |              |
| 5941:      | 27         | 19        | 9  | 1 | 26 | 19 | 8  | 0 | 1328.8559400 | 1328.8564574 |
| -0.0005174 | -0.0003000 | 0.0000000 |    |   |    |    |    |   |              |              |
| 5942:      | 30         | 19        | 12 | 1 | 29 | 19 | 11 | 0 | 1329.6305000 | 1329.6309602 |
| -0.0004602 | -0.0003000 | 0.0000000 |    |   |    |    |    |   |              |              |
| 5943:      | 31         | 19        | 13 | 1 | 30 | 19 | 12 | 0 | 1329.8882500 | 1329.8887493 |
| -0.0004993 | -0.0003000 | 0.0000000 |    |   |    |    |    |   |              |              |
| 5944:      | 32         | 19        | 14 | 1 | 31 | 19 | 13 | 0 | 1330.1466100 | 1330.1463460 |
| 0.0002640  | -0.0003000 | 0.0000000 |    |   |    |    |    |   |              |              |
| 5945:      | 33         | 19        | 15 | 1 | 32 | 19 | 14 | 0 | 1330.4033000 | 1330.4037483 |

|            |            |           |              |              |
|------------|------------|-----------|--------------|--------------|
| -0.0004483 | -0.0003000 | 0.0000000 |              |              |
| 5946:      | 34         | 19        | 16           | 1 33 19 15 0 |
| -0.0000243 | -0.0003000 | 0.0000000 | 1330.6609300 | 1330.6609543 |
| 5947:      | 35         | 19        | 17           | 1 34 19 16 0 |
| -0.0005620 | -0.0003000 | 0.0000000 | 1330.9174000 | 1330.9179620 |
| 5948:      | 36         | 19        | 18           | 1 35 19 17 0 |
| 0.0002704  | -0.0003000 | 0.0000000 | 1331.1750400 | 1331.1747696 |
| 5949:      | 37         | 19        | 19           | 1 36 19 18 0 |
| -0.0000750 | -0.0003000 | 0.0000000 | 1331.4313000 | 1331.4313750 |
| 5950:      | 38         | 19        | 20           | 1 37 19 19 0 |
| -0.0000564 | -0.0003000 | 0.0000000 | 1331.6877200 | 1331.6877764 |
| 5951:      | 40         | 19        | 22           | 1 39 19 21 0 |
| 0.0000211  | -0.0003000 | 0.0000000 | 1332.1999800 | 1332.1999589 |
| 5952:      | 41         | 19        | 23           | 1 40 19 22 0 |
| 0.0000137  | -0.0003000 | 0.0000000 | 1332.4557500 | 1332.4557363 |
| 5953:      | 42         | 19        | 24           | 1 41 19 23 0 |
| -0.0002616 | -0.0003000 | 0.0000000 | 1332.7110400 | 1332.7113016 |
| 5954:      | 43         | 19        | 25           | 1 42 19 24 0 |
| 0.0003570  | -0.0003000 | 0.0000000 | 1332.9670100 | 1332.9666530 |
| 5955:      | 44         | 19        | 26           | 1 43 19 25 0 |
| -0.0003785 | -0.0003000 | 0.0000000 | 1333.2214100 | 1333.2217885 |
| 5956:      | 46         | 19        | 28           | 1 45 19 27 0 |
| -0.0002737 | -0.0003000 | 0.0000000 | 1333.7311300 | 1333.7314037 |
| 5957:      | 48         | 19        | 30           | 1 47 19 29 0 |
| 0.0000788  | -0.0003000 | 0.0000000 | 1334.2402100 | 1334.2401312 |
| 5958:      | 49         | 19        | 31           | 1 48 19 30 0 |
| 0.0000130  | -0.0003000 | 0.0000000 | 1334.4941700 | 1334.4941570 |
| 5959:      | 50         | 19        | 32           | 1 49 19 31 0 |
| 0.0001252  | -0.0003000 | 0.0000000 | 1334.7480800 | 1334.7479548 |
| 5960:      | 51         | 19        | 33           | 1 50 19 32 0 |
| -0.0002525 | -0.0003000 | 0.0000000 | 1335.0012700 | 1335.0015225 |
| 5961:      | 52         | 19        | 34           | 1 51 19 33 0 |
| 0.0003918  | -0.0003000 | 0.0000000 | 1335.2552500 | 1335.2548582 |
| 5962:      | 53         | 19        | 35           | 1 52 19 34 0 |
| -0.0004197 | -0.0003000 | 0.0000000 | 1335.5075400 | 1335.5079597 |
| 5963:      | 54         | 19        | 36           | 1 53 19 35 0 |
| -0.0004250 | -0.0003000 | 0.0000000 | 1335.7604000 | 1335.7608250 |
| 5964:      | 55         | 19        | 37           | 1 54 19 36 0 |
| 0.0002380  | -0.0003000 | 0.0000000 | 1336.0136900 | 1336.0134520 |
| 5965:      | 56         | 19        | 38           | 1 55 19 37 0 |
| 0.0000313  | -0.0003000 | 0.0000000 | 1336.2658700 | 1336.2658387 |
| 5966:      | 57         | 19        | 39           | 1 56 19 38 0 |
| -0.0002530 | -0.0003000 | 0.0000000 | 1336.5177300 | 1336.5179830 |
| 5967:      | 58         | 19        | 40           | 1 57 19 39 0 |
| -0.0007828 | -0.0003000 | 0.0000000 | 1336.7691000 | 1336.7698828 |
| 5968:      | 59         | 19        | 41           | 1 58 19 40 0 |
| 0.0001841  | -0.0003000 | 0.0000000 | 1337.0217200 | 1337.0215359 |
| 5969:      | 60         | 19        | 42           | 1 59 19 41 0 |
| -0.0002303 | -0.0003000 | 0.0000000 | 1337.2727100 | 1337.2729403 |
| 5970:      | 61         | 19        | 43           | 1 60 19 42 0 |
| -0.0005339 | -0.0003000 | 0.0000000 | 1337.5235600 | 1337.5240939 |
| 5971:      | 62         | 19        | 44           | 1 61 19 43 0 |
| 0.0003155  | -0.0003000 | 0.0000000 | 1337.7753100 | 1337.7749945 |
| 5972:      | 65         | 19        | 47           | 1 64 19 46 0 |
| 0.0000728  | -0.0003000 | 0.0000000 | 1338.5262300 | 1338.5261572 |
| 5973:      | 66         | 19        | 48           | 1 65 19 47 0 |
| 0.0004255  | -0.0003000 | 0.0000000 | 1338.7764500 | 1338.7760245 |
| 5974:      | 67         | 19        | 49           | 1 66 19 48 0 |
| -0.0002081 | -0.0003000 | 0.0000000 | 1339.0254200 | 1339.0256281 |
| 5975:      | 70         | 19        | 52           | 1 69 19 51 0 |
| -0.0002946 | -0.0003000 | 0.0000000 | 1339.7725400 | 1339.7728346 |
| 5976:      | 71         | 19        | 53           | 1 70 19 52 0 |
| -0.0001914 | -0.0003000 | 0.0000000 | 1340.0211700 | 1340.0213614 |
| 5977:      | 72         | 19        | 54           | 1 71 19 53 0 |
| -0.0002834 | -0.0003000 | 0.0000000 | 1340.2693300 | 1340.2696134 |

|                                 |              |              |
|---------------------------------|--------------|--------------|
| 5978: 69 20 49 1 70 20 50 0     | 1302.7946500 | 1302.7939220 |
| 0.0007280 -0.0003000 0.0000000  |              |              |
| 5979: 68 20 48 1 69 20 49 0     | 1303.0614400 | 1303.0617926 |
| -0.0003526 -0.0003000 0.0000000 |              |              |
| 5980: 67 20 47 1 68 20 48 0     | 1303.3297100 | 1303.3296494 |
| 0.0000606 -0.0003000 0.0000000  |              |              |
| 5981: 66 20 46 1 67 20 47 0     | 1303.5977800 | 1303.5974909 |
| 0.0002891 -0.0003000 0.0000000  |              |              |
| 5982: 63 20 43 1 64 20 44 0     | 1304.4006400 | 1304.4009069 |
| -0.0002669 -0.0003000 0.0000000 |              |              |
| 5983: 62 20 42 1 63 20 43 0     | 1304.6684900 | 1304.6686706 |
| -0.0001806 -0.0003000 0.0000000 |              |              |
| 5984: 61 20 41 1 62 20 42 0     | 1304.9366800 | 1304.9364107 |
| 0.0002693 -0.0003000 0.0000000  |              |              |
| 5985: 60 20 40 1 61 20 41 0     | 1305.2044000 | 1305.2041255 |
| 0.0002745 -0.0003000 0.0000000  |              |              |
| 5986: 59 20 39 1 60 20 40 0     | 1305.4719800 | 1305.4718134 |
| 0.0001666 -0.0003000 0.0000000  |              |              |
| 5987: 58 20 38 1 59 20 39 0     | 1305.7393200 | 1305.7394726 |
| -0.0001526 -0.0003000 0.0000000 |              |              |
| 5988: 57 20 37 1 58 20 38 0     | 1306.0073000 | 1306.0071016 |
| 0.0001984 -0.0003000 0.0000000  |              |              |
| 5989: 56 20 36 1 57 20 37 0     | 1306.2748000 | 1306.2746986 |
| 0.0001014 -0.0003000 0.0000000  |              |              |
| 5990: 55 20 35 1 56 20 36 0     | 1306.5420000 | 1306.5422619 |
| -0.0002619 -0.0003000 0.0000000 |              |              |
| 5991: 54 20 34 1 55 20 35 0     | 1306.8102100 | 1306.8097899 |
| 0.0004201 -0.0003000 0.0000000  |              |              |
| 5992: 49 20 29 1 50 20 30 0     | 1308.1464800 | 1308.1468404 |
| -0.0003604 -0.0003000 0.0000000 |              |              |
| 5993: 48 20 28 1 49 20 29 0     | 1308.4142300 | 1308.4141207 |
| 0.0001093 -0.0003000 0.0000000  |              |              |
| 5994: 47 20 27 1 48 20 28 0     | 1308.6817600 | 1308.6813538 |
| 0.0004062 -0.0003000 0.0000000  |              |              |
| 5995: 46 20 26 1 47 20 27 0     | 1308.9485400 | 1308.9485379 |
| 0.0000021 -0.0003000 0.0000000  |              |              |
| 5996: 45 20 25 1 46 20 26 0     | 1309.2157600 | 1309.2156714 |
| 0.0000886 -0.0003000 0.0000000  |              |              |
| 5997: 44 20 24 1 45 20 25 0     | 1309.4826200 | 1309.4827525 |
| -0.0001325 -0.0003000 0.0000000 |              |              |
| 5998: 43 20 23 1 44 20 24 0     | 1309.7496200 | 1309.7497794 |
| -0.0001594 -0.0003000 0.0000000 |              |              |
| 5999: 42 20 22 1 43 20 23 0     | 1310.0168900 | 1310.0167506 |
| 0.0001394 -0.0003000 0.0000000  |              |              |
| 6000: 41 20 21 1 42 20 22 0     | 1310.2837900 | 1310.2836642 |
| 0.0001258 -0.0003000 0.0000000  |              |              |
| 6001: 40 20 20 1 41 20 21 0     | 1310.5504400 | 1310.5505185 |
| -0.0000785 -0.0003000 0.0000000 |              |              |
| 6002: 39 20 19 1 40 20 20 0     | 1310.8176500 | 1310.8173119 |
| 0.0003381 -0.0003000 0.0000000  |              |              |
| 6003: 38 20 18 1 39 20 19 0     | 1311.0842800 | 1311.0840424 |
| 0.0002376 -0.0003000 0.0000000  |              |              |
| 6004: 37 20 17 1 38 20 18 0     | 1311.3508400 | 1311.3507086 |
| 0.0001314 -0.0003000 0.0000000  |              |              |
| 6005: 36 20 16 1 37 20 17 0     | 1311.6168300 | 1311.6173085 |
| -0.0004785 -0.0003000 0.0000000 |              |              |
| 6006: 35 20 15 1 36 20 16 0     | 1311.8837400 | 1311.8838404 |
| -0.0001004 -0.0003000 0.0000000 |              |              |
| 6007: 34 20 14 1 35 20 15 0     | 1312.1496200 | 1312.1503027 |
| -0.0006827 -0.0003000 0.0000000 |              |              |
| 6008: 33 20 13 1 34 20 14 0     | 1312.4165700 | 1312.4166935 |
| -0.0001235 -0.0003000 0.0000000 |              |              |
| 6009: 32 20 12 1 33 20 13 0     | 1312.6826500 | 1312.6830112 |
| -0.0003612 -0.0003000 0.0000000 |              |              |
| 6010: 31 20 11 1 32 20 12 0     | 1312.9494200 | 1312.9492539 |

|            |                    |           |              |              |
|------------|--------------------|-----------|--------------|--------------|
| 0.0001661  | -0.0003000         | 0.0000000 |              |              |
| 6011: 30   | 20 10 1 31 20 11 0 |           | 1313.2156300 | 1313.2154199 |
| 0.0002101  | -0.0003000         | 0.0000000 |              |              |
| 6012: 22   | 20 2 1 21 20 1 0   |           | 1327.1668300 | 1327.1656286 |
| 0.0012014  | -0.0003000         | 0.0000000 |              |              |
| 6013: 23   | 20 3 1 22 20 2 0   |           | 1327.4255700 | 1327.4249828 |
| 0.0005872  | -0.0003000         | 0.0000000 |              |              |
| 6014: 24   | 20 4 1 23 20 3 0   |           | 1327.6846600 | 1327.6841600 |
| 0.0005000  | -0.0003000         | 0.0000000 |              |              |
| 6015: 25   | 20 5 1 24 20 4 0   |           | 1327.9433800 | 1327.9431581 |
| 0.0002219  | -0.0003000         | 0.0000000 |              |              |
| 6016: 26   | 20 6 1 25 20 5 0   |           | 1328.2026100 | 1328.2019752 |
| 0.0006348  | -0.0003000         | 0.0000000 |              |              |
| 6017: 27   | 20 7 1 26 20 6 0   |           | 1328.4609100 | 1328.4606095 |
| 0.0003005  | -0.0003000         | 0.0000000 |              |              |
| 6018: 45   | 20 25 1 44 20 24 0 |           | 1333.0824900 | 1333.0825201 |
| -0.0000301 | -0.0003000         | 0.0000000 |              |              |
| 6019: 46   | 20 26 1 45 20 25 0 |           | 1333.3367700 | 1333.3373055 |
| -0.0005355 | -0.0003000         | 0.0000000 |              |              |
| 6020: 47   | 20 27 1 46 20 26 0 |           | 1333.5915800 | 1333.5918683 |
| -0.0002883 | -0.0003000         | 0.0000000 |              |              |
| 6021: 54   | 20 34 1 53 20 33 0 |           | 1335.3669900 | 1335.3673995 |
| -0.0004095 | -0.0003000         | 0.0000000 |              |              |
| 6022: 55   | 20 35 1 54 20 34 0 |           | 1335.6201700 | 1335.6201063 |
| 0.0000637  | -0.0003000         | 0.0000000 |              |              |
| 6023: 56   | 20 36 1 55 20 35 0 |           | 1335.8730600 | 1335.8725718 |
| 0.0004882  | -0.0003000         | 0.0000000 |              |              |
| 6024: 57   | 20 37 1 56 20 36 0 |           | 1336.1245500 | 1336.1247937 |
| -0.0002437 | -0.0003000         | 0.0000000 |              |              |
| 6025: 58   | 20 38 1 57 20 37 0 |           | 1336.3774900 | 1336.3767699 |
| 0.0007201  | -0.0003000         | 0.0000000 |              |              |
| 6026: 59   | 20 39 1 58 20 38 0 |           | 1336.6293400 | 1336.6284983 |
| 0.0008417  | -0.0003000         | 0.0000000 |              |              |
| 6027: 60   | 20 40 1 59 20 39 0 |           | 1336.8805000 | 1336.8799768 |
| 0.0005232  | -0.0003000         | 0.0000000 |              |              |
| 6028: 63   | 20 43 1 62 20 42 0 |           | 1337.6328100 | 1337.6328909 |
| -0.0000809 | -0.0003000         | 0.0000000 |              |              |
| 6029: 64   | 20 44 1 63 20 43 0 |           | 1337.8829400 | 1337.8833479 |
| -0.0004079 | -0.0003000         | 0.0000000 |              |              |
| 6030: 65   | 20 45 1 64 20 44 0 |           | 1338.1332900 | 1338.1335440 |
| -0.0002540 | -0.0003000         | 0.0000000 |              |              |
| 6031: 67   | 20 47 1 66 20 46 0 |           | 1338.6323200 | 1338.6331451 |
| -0.0008251 | -0.0003000         | 0.0000000 |              |              |
| 6032: 69   | 20 49 1 68 20 48 0 |           | 1339.1316800 | 1339.1316765 |
| 0.0000035  | -0.0003000         | 0.0000000 |              |              |
| 6033: 71   | 20 51 1 70 20 50 0 |           | 1339.6289600 | 1339.6291201 |
| -0.0001601 | -0.0003000         | 0.0000000 |              |              |
| 6034: 74   | 20 54 1 73 20 53 0 |           | 1340.3725500 | 1340.3732069 |
| -0.0006569 | -0.0003000         | 0.0000000 |              |              |
| 6035: 69   | 20 50 1 70 20 51 0 |           | 1302.7946500 | 1302.7939220 |
| 0.0007280  | -0.0003000         | 0.0000000 |              |              |
| 6036: 68   | 20 49 1 69 20 50 0 |           | 1303.0614400 | 1303.0617926 |
| -0.0003526 | -0.0003000         | 0.0000000 |              |              |
| 6037: 67   | 20 48 1 68 20 49 0 |           | 1303.3297100 | 1303.3296494 |
| 0.0000606  | -0.0003000         | 0.0000000 |              |              |
| 6038: 66   | 20 47 1 67 20 48 0 |           | 1303.5977800 | 1303.5974909 |
| 0.0002891  | -0.0003000         | 0.0000000 |              |              |
| 6039: 63   | 20 44 1 64 20 45 0 |           | 1304.4006400 | 1304.4009069 |
| -0.0002669 | -0.0003000         | 0.0000000 |              |              |
| 6040: 62   | 20 43 1 63 20 44 0 |           | 1304.6684900 | 1304.6686706 |
| -0.0001806 | -0.0003000         | 0.0000000 |              |              |
| 6041: 61   | 20 42 1 62 20 43 0 |           | 1304.9366800 | 1304.9364107 |
| 0.0002693  | -0.0003000         | 0.0000000 |              |              |
| 6042: 60   | 20 41 1 61 20 42 0 |           | 1305.2044000 | 1305.2041255 |
| 0.0002745  | -0.0003000         | 0.0000000 |              |              |

|       |            |            |           |   |    |    |    |   |              |              |
|-------|------------|------------|-----------|---|----|----|----|---|--------------|--------------|
| 6043: | 59         | 20         | 40        | 1 | 60 | 20 | 41 | 0 | 1305.4719800 | 1305.4718134 |
|       | 0.0001666  | -0.0003000 | 0.0000000 |   |    |    |    |   |              |              |
| 6044: | 58         | 20         | 39        | 1 | 59 | 20 | 40 | 0 | 1305.7393200 | 1305.7394726 |
|       | -0.0001526 | -0.0003000 | 0.0000000 |   |    |    |    |   |              |              |
| 6045: | 57         | 20         | 38        | 1 | 58 | 20 | 39 | 0 | 1306.0073000 | 1306.0071016 |
|       | 0.0001984  | -0.0003000 | 0.0000000 |   |    |    |    |   |              |              |
| 6046: | 56         | 20         | 37        | 1 | 57 | 20 | 38 | 0 | 1306.2748000 | 1306.2746986 |
|       | 0.0001014  | -0.0003000 | 0.0000000 |   |    |    |    |   |              |              |
| 6047: | 55         | 20         | 36        | 1 | 56 | 20 | 37 | 0 | 1306.5420000 | 1306.5422619 |
|       | -0.0002619 | -0.0003000 | 0.0000000 |   |    |    |    |   |              |              |
| 6048: | 54         | 20         | 35        | 1 | 55 | 20 | 36 | 0 | 1306.8102100 | 1306.8097899 |
|       | 0.0004201  | -0.0003000 | 0.0000000 |   |    |    |    |   |              |              |
| 6049: | 49         | 20         | 30        | 1 | 50 | 20 | 31 | 0 | 1308.1464800 | 1308.1468404 |
|       | -0.0003604 | -0.0003000 | 0.0000000 |   |    |    |    |   |              |              |
| 6050: | 48         | 20         | 29        | 1 | 49 | 20 | 30 | 0 | 1308.4142300 | 1308.4141207 |
|       | 0.0001093  | -0.0003000 | 0.0000000 |   |    |    |    |   |              |              |
| 6051: | 47         | 20         | 28        | 1 | 48 | 20 | 29 | 0 | 1308.6817600 | 1308.6813538 |
|       | 0.0004062  | -0.0003000 | 0.0000000 |   |    |    |    |   |              |              |
| 6052: | 46         | 20         | 27        | 1 | 47 | 20 | 28 | 0 | 1308.9485400 | 1308.9485379 |
|       | 0.0000021  | -0.0003000 | 0.0000000 |   |    |    |    |   |              |              |
| 6053: | 45         | 20         | 26        | 1 | 46 | 20 | 27 | 0 | 1309.2157600 | 1309.2156714 |
|       | 0.0000886  | -0.0003000 | 0.0000000 |   |    |    |    |   |              |              |
| 6054: | 44         | 20         | 25        | 1 | 45 | 20 | 26 | 0 | 1309.4826200 | 1309.4827525 |
|       | -0.0001325 | -0.0003000 | 0.0000000 |   |    |    |    |   |              |              |
| 6055: | 43         | 20         | 24        | 1 | 44 | 20 | 25 | 0 | 1309.7496200 | 1309.7497794 |
|       | -0.0001594 | -0.0003000 | 0.0000000 |   |    |    |    |   |              |              |
| 6056: | 42         | 20         | 23        | 1 | 43 | 20 | 24 | 0 | 1310.0168900 | 1310.0167506 |
|       | 0.0001394  | -0.0003000 | 0.0000000 |   |    |    |    |   |              |              |
| 6057: | 41         | 20         | 22        | 1 | 42 | 20 | 23 | 0 | 1310.2837900 | 1310.2836642 |
|       | 0.0001258  | -0.0003000 | 0.0000000 |   |    |    |    |   |              |              |
| 6058: | 40         | 20         | 21        | 1 | 41 | 20 | 22 | 0 | 1310.5504400 | 1310.5505185 |
|       | -0.0000785 | -0.0003000 | 0.0000000 |   |    |    |    |   |              |              |
| 6059: | 39         | 20         | 20        | 1 | 40 | 20 | 21 | 0 | 1310.8176500 | 1310.8173119 |
|       | 0.0003381  | -0.0003000 | 0.0000000 |   |    |    |    |   |              |              |
| 6060: | 38         | 20         | 19        | 1 | 39 | 20 | 20 | 0 | 1311.0842800 | 1311.0840424 |
|       | 0.0002376  | -0.0003000 | 0.0000000 |   |    |    |    |   |              |              |
| 6061: | 37         | 20         | 18        | 1 | 38 | 20 | 19 | 0 | 1311.3508400 | 1311.3507086 |
|       | 0.0001314  | -0.0003000 | 0.0000000 |   |    |    |    |   |              |              |
| 6062: | 36         | 20         | 17        | 1 | 37 | 20 | 18 | 0 | 1311.6168300 | 1311.6173085 |
|       | -0.0004785 | -0.0003000 | 0.0000000 |   |    |    |    |   |              |              |
| 6063: | 35         | 20         | 16        | 1 | 36 | 20 | 17 | 0 | 1311.8837400 | 1311.8838404 |
|       | -0.0001004 | -0.0003000 | 0.0000000 |   |    |    |    |   |              |              |
| 6064: | 34         | 20         | 15        | 1 | 35 | 20 | 16 | 0 | 1312.1496200 | 1312.1503027 |
|       | -0.0006827 | -0.0003000 | 0.0000000 |   |    |    |    |   |              |              |
| 6065: | 33         | 20         | 14        | 1 | 34 | 20 | 15 | 0 | 1312.4165700 | 1312.4166935 |
|       | -0.0001235 | -0.0003000 | 0.0000000 |   |    |    |    |   |              |              |
| 6066: | 32         | 20         | 13        | 1 | 33 | 20 | 14 | 0 | 1312.6826500 | 1312.6830112 |
|       | -0.0003612 | -0.0003000 | 0.0000000 |   |    |    |    |   |              |              |
| 6067: | 31         | 20         | 12        | 1 | 32 | 20 | 13 | 0 | 1312.9494200 | 1312.9492539 |
|       | 0.0001661  | -0.0003000 | 0.0000000 |   |    |    |    |   |              |              |
| 6068: | 30         | 20         | 11        | 1 | 31 | 20 | 12 | 0 | 1313.2156300 | 1313.2154199 |
|       | 0.0002101  | -0.0003000 | 0.0000000 |   |    |    |    |   |              |              |
| 6069: | 22         | 20         | 3         | 1 | 21 | 20 | 2  | 0 | 1327.1668300 | 1327.1656286 |
|       | 0.0012014  | -0.0003000 | 0.0000000 |   |    |    |    |   |              |              |
| 6070: | 23         | 20         | 4         | 1 | 22 | 20 | 3  | 0 | 1327.4255700 | 1327.4249828 |
|       | 0.0005872  | -0.0003000 | 0.0000000 |   |    |    |    |   |              |              |
| 6071: | 24         | 20         | 5         | 1 | 23 | 20 | 4  | 0 | 1327.6846600 | 1327.6841600 |
|       | 0.0005000  | -0.0003000 | 0.0000000 |   |    |    |    |   |              |              |
| 6072: | 25         | 20         | 6         | 1 | 24 | 20 | 5  | 0 | 1327.9433800 | 1327.9431581 |
|       | 0.0002219  | -0.0003000 | 0.0000000 |   |    |    |    |   |              |              |
| 6073: | 26         | 20         | 7         | 1 | 25 | 20 | 6  | 0 | 1328.2026100 | 1328.2019752 |
|       | 0.0006348  | -0.0003000 | 0.0000000 |   |    |    |    |   |              |              |
| 6074: | 27         | 20         | 8         | 1 | 26 | 20 | 7  | 0 | 1328.4609100 | 1328.4606095 |
|       | 0.0003005  | -0.0003000 | 0.0000000 |   |    |    |    |   |              |              |
| 6075: | 45         | 20         | 26        | 1 | 44 | 20 | 25 | 0 | 1333.0824900 | 1333.0825201 |

|            |            |                    |              |              |
|------------|------------|--------------------|--------------|--------------|
| -0.0000301 | -0.0003000 | 0.0000000          |              |              |
| 6076:      | 46         | 20 27 1 45 20 26 0 | 1333.3367700 | 1333.3373055 |
| -0.0005355 | -0.0003000 | 0.0000000          |              |              |
| 6077:      | 47         | 20 28 1 46 20 27 0 | 1333.5915800 | 1333.5918683 |
| -0.0002883 | -0.0003000 | 0.0000000          |              |              |
| 6078:      | 54         | 20 35 1 53 20 34 0 | 1335.3669900 | 1335.3673995 |
| -0.0004095 | -0.0003000 | 0.0000000          |              |              |
| 6079:      | 55         | 20 36 1 54 20 35 0 | 1335.6201700 | 1335.6201063 |
| 0.0000637  | -0.0003000 | 0.0000000          |              |              |
| 6080:      | 56         | 20 37 1 55 20 36 0 | 1335.8730600 | 1335.8725718 |
| 0.0004882  | -0.0003000 | 0.0000000          |              |              |
| 6081:      | 57         | 20 38 1 56 20 37 0 | 1336.1245500 | 1336.1247937 |
| -0.0002437 | -0.0003000 | 0.0000000          |              |              |
| 6082:      | 58         | 20 39 1 57 20 38 0 | 1336.3774900 | 1336.3767699 |
| 0.0007201  | -0.0003000 | 0.0000000          |              |              |
| 6083:      | 59         | 20 40 1 58 20 39 0 | 1336.6293400 | 1336.6284983 |
| 0.0008417  | -0.0003000 | 0.0000000          |              |              |
| 6084:      | 60         | 20 41 1 59 20 40 0 | 1336.8805000 | 1336.8799768 |
| 0.0005232  | -0.0003000 | 0.0000000          |              |              |
| 6085:      | 63         | 20 44 1 62 20 43 0 | 1337.6328100 | 1337.6328909 |
| -0.0000809 | -0.0003000 | 0.0000000          |              |              |
| 6086:      | 64         | 20 45 1 63 20 44 0 | 1337.8829400 | 1337.8833479 |
| -0.0004079 | -0.0003000 | 0.0000000          |              |              |
| 6087:      | 65         | 20 46 1 64 20 45 0 | 1338.1332900 | 1338.1335440 |
| -0.0002540 | -0.0003000 | 0.0000000          |              |              |
| 6088:      | 67         | 20 48 1 66 20 47 0 | 1338.6323200 | 1338.6331451 |
| -0.0008251 | -0.0003000 | 0.0000000          |              |              |
| 6089:      | 69         | 20 50 1 68 20 49 0 | 1339.1316800 | 1339.1316765 |
| 0.0000035  | -0.0003000 | 0.0000000          |              |              |
| 6090:      | 71         | 20 52 1 70 20 51 0 | 1339.6289600 | 1339.6291201 |
| -0.0001601 | -0.0003000 | 0.0000000          |              |              |
| 6091:      | 74         | 20 55 1 73 20 54 0 | 1340.3725500 | 1340.3732069 |
| -0.0006569 | -0.0003000 | 0.0000000          |              |              |
| 6092:      | 71         | 21 50 1 72 21 51 0 | 1301.8371900 | 1301.8375269 |
| -0.0003369 | -0.0003000 | 0.0000000          |              |              |
| 6093:      | 70         | 21 49 1 71 21 50 0 | 1302.1053800 | 1302.1054248 |
| -0.0000448 | -0.0003000 | 0.0000000          |              |              |
| 6094:      | 69         | 21 48 1 70 21 49 0 | 1302.3734800 | 1302.3733132 |
| 0.0001668  | -0.0003000 | 0.0000000          |              |              |
| 6095:      | 68         | 21 47 1 69 21 48 0 | 1302.6411800 | 1302.6411906 |
| -0.0000106 | -0.0003000 | 0.0000000          |              |              |
| 6096:      | 67         | 21 46 1 68 21 47 0 | 1302.9088000 | 1302.9090553 |
| -0.0002553 | -0.0003000 | 0.0000000          |              |              |
| 6097:      | 66         | 21 45 1 67 21 46 0 | 1303.1768400 | 1303.1769058 |
| -0.0000658 | -0.0003000 | 0.0000000          |              |              |
| 6098:      | 65         | 21 44 1 66 21 45 0 | 1303.4444300 | 1303.4447403 |
| -0.0003103 | -0.0003000 | 0.0000000          |              |              |
| 6099:      | 64         | 21 43 1 65 21 44 0 | 1303.7129900 | 1303.7125573 |
| 0.0004327  | -0.0003000 | 0.0000000          |              |              |
| 6100:      | 60         | 21 39 1 61 21 40 0 | 1304.7830500 | 1304.7836165 |
| -0.0005665 | -0.0003000 | 0.0000000          |              |              |
| 6101:      | 59         | 21 38 1 60 21 39 0 | 1305.0517000 | 1305.0513210 |
| 0.0003790  | -0.0003000 | 0.0000000          |              |              |
| 6102:      | 58         | 21 37 1 59 21 38 0 | 1305.3183300 | 1305.3189979 |
| -0.0006679 | -0.0003000 | 0.0000000          |              |              |
| 6103:      | 57         | 21 36 1 58 21 37 0 | 1305.5871100 | 1305.5866457 |
| 0.0004643  | -0.0003000 | 0.0000000          |              |              |
| 6104:      | 56         | 21 35 1 57 21 36 0 | 1305.8547700 | 1305.8542627 |
| 0.0005073  | -0.0003000 | 0.0000000          |              |              |
| 6105:      | 55         | 21 34 1 56 21 35 0 | 1306.1217100 | 1306.1218472 |
| -0.0001372 | -0.0003000 | 0.0000000          |              |              |
| 6106:      | 52         | 21 31 1 53 21 32 0 | 1306.9239600 | 1306.9243889 |
| -0.0004289 | -0.0003000 | 0.0000000          |              |              |
| 6107:      | 50         | 21 29 1 51 21 30 0 | 1307.4597400 | 1307.4592233 |
| 0.0005167  | -0.0003000 | 0.0000000          |              |              |

|            |            |           |    |   |    |    |    |   |              |              |
|------------|------------|-----------|----|---|----|----|----|---|--------------|--------------|
| 6108:      | 48         | 21        | 27 | 1 | 49 | 21 | 28 | 0 | 1307.9937200 | 1307.9938874 |
| -0.0001674 | -0.0003000 | 0.0000000 |    |   |    |    |    |   |              |              |
| 6109:      | 46         | 21        | 25 | 1 | 47 | 21 | 26 | 0 | 1308.5281200 | 1308.5283673 |
| -0.0002473 | -0.0003000 | 0.0000000 |    |   |    |    |    |   |              |              |
| 6110:      | 45         | 21        | 24 | 1 | 46 | 21 | 25 | 0 | 1308.7957000 | 1308.7955340 |
| 0.0001660  | -0.0003000 | 0.0000000 |    |   |    |    |    |   |              |              |
| 6111:      | 44         | 21        | 23 | 1 | 45 | 21 | 24 | 0 | 1309.0630200 | 1309.0626495 |
| 0.0003705  | -0.0003000 | 0.0000000 |    |   |    |    |    |   |              |              |
| 6112:      | 43         | 21        | 22 | 1 | 44 | 21 | 23 | 0 | 1309.3299500 | 1309.3297122 |
| 0.0002378  | -0.0003000 | 0.0000000 |    |   |    |    |    |   |              |              |
| 6113:      | 42         | 21        | 21 | 1 | 43 | 21 | 22 | 0 | 1309.5965100 | 1309.5967203 |
| -0.0002103 | -0.0003000 | 0.0000000 |    |   |    |    |    |   |              |              |
| 6114:      | 41         | 21        | 20 | 1 | 42 | 21 | 21 | 0 | 1309.8642900 | 1309.8636720 |
| 0.0006180  | -0.0003000 | 0.0000000 |    |   |    |    |    |   |              |              |
| 6115:      | 40         | 21        | 19 | 1 | 41 | 21 | 20 | 0 | 1310.1311400 | 1310.1305658 |
| 0.0005742  | -0.0003000 | 0.0000000 |    |   |    |    |    |   |              |              |
| 6116:      | 31         | 21        | 10 | 1 | 32 | 21 | 11 | 0 | 1312.5293900 | 1312.5297120 |
| -0.0003220 | -0.0003000 | 0.0000000 |    |   |    |    |    |   |              |              |
| 6117:      | 30         | 21        | 9  | 1 | 31 | 21 | 10 | 0 | 1312.7955400 | 1312.7959298 |
| -0.0003898 | -0.0003000 | 0.0000000 |    |   |    |    |    |   |              |              |
| 6118:      | 26         | 21        | 5  | 1 | 25 | 21 | 4  | 0 | 1327.7866000 | 1327.7871009 |
| -0.0005009 | -0.0003000 | 0.0000000 |    |   |    |    |    |   |              |              |
| 6119:      | 27         | 21        | 6  | 1 | 26 | 21 | 5  | 0 | 1328.0457100 | 1328.0458346 |
| -0.0001246 | -0.0003000 | 0.0000000 |    |   |    |    |    |   |              |              |
| 6120:      | 28         | 21        | 7  | 1 | 27 | 21 | 6  | 0 | 1328.3035500 | 1328.3043836 |
| -0.0008336 | -0.0003000 | 0.0000000 |    |   |    |    |    |   |              |              |
| 6121:      | 30         | 21        | 9  | 1 | 29 | 21 | 8  | 0 | 1328.8208900 | 1328.8209196 |
| -0.0000296 | -0.0003000 | 0.0000000 |    |   |    |    |    |   |              |              |
| 6122:      | 31         | 21        | 10 | 1 | 30 | 21 | 9  | 0 | 1329.0785400 | 1329.0789027 |
| -0.0003627 | -0.0003000 | 0.0000000 |    |   |    |    |    |   |              |              |
| 6123:      | 32         | 21        | 11 | 1 | 31 | 21 | 10 | 0 | 1329.3372000 | 1329.3366932 |
| 0.0005068  | -0.0003000 | 0.0000000 |    |   |    |    |    |   |              |              |
| 6124:      | 40         | 21        | 19 | 1 | 39 | 21 | 18 | 0 | 1331.3918000 | 1331.3918436 |
| -0.0000436 | -0.0003000 | 0.0000000 |    |   |    |    |    |   |              |              |
| 6125:      | 42         | 21        | 21 | 1 | 41 | 21 | 20 | 0 | 1331.9039000 | 1331.9035644 |
| 0.0003356  | -0.0003000 | 0.0000000 |    |   |    |    |    |   |              |              |
| 6126:      | 43         | 21        | 22 | 1 | 42 | 21 | 21 | 0 | 1332.1594800 | 1332.1591035 |
| 0.0003765  | -0.0003000 | 0.0000000 |    |   |    |    |    |   |              |              |
| 6127:      | 44         | 21        | 23 | 1 | 43 | 21 | 22 | 0 | 1332.4144200 | 1332.4144258 |
| -0.0000058 | -0.0003000 | 0.0000000 |    |   |    |    |    |   |              |              |
| 6128:      | 45         | 21        | 24 | 1 | 44 | 21 | 23 | 0 | 1332.6696500 | 1332.6695291 |
| 0.0001209  | -0.0003000 | 0.0000000 |    |   |    |    |    |   |              |              |
| 6129:      | 47         | 21        | 26 | 1 | 46 | 21 | 25 | 0 | 1333.1788600 | 1333.1790704 |
| -0.0002104 | -0.0003000 | 0.0000000 |    |   |    |    |    |   |              |              |
| 6130:      | 48         | 21        | 27 | 1 | 47 | 21 | 26 | 0 | 1333.4341400 | 1333.4335043 |
| 0.0006357  | -0.0003000 | 0.0000000 |    |   |    |    |    |   |              |              |
| 6131:      | 49         | 21        | 28 | 1 | 48 | 21 | 27 | 0 | 1333.6885700 | 1333.6877109 |
| 0.0008591  | -0.0003000 | 0.0000000 |    |   |    |    |    |   |              |              |
| 6132:      | 50         | 21        | 29 | 1 | 49 | 21 | 28 | 0 | 1333.9418400 | 1333.9416881 |
| 0.0001519  | -0.0003000 | 0.0000000 |    |   |    |    |    |   |              |              |
| 6133:      | 51         | 21        | 30 | 1 | 50 | 21 | 29 | 0 | 1334.1962500 | 1334.1954338 |
| 0.0008162  | -0.0003000 | 0.0000000 |    |   |    |    |    |   |              |              |
| 6134:      | 52         | 21        | 31 | 1 | 51 | 21 | 30 | 0 | 1334.4496300 | 1334.4489459 |
| 0.0006841  | -0.0003000 | 0.0000000 |    |   |    |    |    |   |              |              |
| 6135:      | 71         | 21        | 51 | 1 | 72 | 21 | 52 | 0 | 1301.8371900 | 1301.8375269 |
| -0.0003369 | -0.0003000 | 0.0000000 |    |   |    |    |    |   |              |              |
| 6136:      | 70         | 21        | 50 | 1 | 71 | 21 | 51 | 0 | 1302.1053800 | 1302.1054248 |
| -0.0000448 | -0.0003000 | 0.0000000 |    |   |    |    |    |   |              |              |
| 6137:      | 69         | 21        | 49 | 1 | 70 | 21 | 50 | 0 | 1302.3734800 | 1302.3733132 |
| 0.0001668  | -0.0003000 | 0.0000000 |    |   |    |    |    |   |              |              |
| 6138:      | 68         | 21        | 48 | 1 | 69 | 21 | 49 | 0 | 1302.6411800 | 1302.6411906 |
| -0.0000106 | -0.0003000 | 0.0000000 |    |   |    |    |    |   |              |              |
| 6139:      | 67         | 21        | 47 | 1 | 68 | 21 | 48 | 0 | 1302.9088000 | 1302.9090553 |
| -0.0002553 | -0.0003000 | 0.0000000 |    |   |    |    |    |   |              |              |
| 6140:      | 66         | 21        | 46 | 1 | 67 | 21 | 47 | 0 | 1303.1768400 | 1303.1769058 |

|            |            |                    |              |              |
|------------|------------|--------------------|--------------|--------------|
| -0.0000658 | -0.0003000 | 0.0000000          |              |              |
| 6141:      | 65         | 21 45 1 66 21 46 0 | 1303.4444300 | 1303.4447403 |
| -0.0003103 | -0.0003000 | 0.0000000          |              |              |
| 6142:      | 64         | 21 44 1 65 21 45 0 | 1303.7129900 | 1303.7125573 |
| 0.0004327  | -0.0003000 | 0.0000000          |              |              |
| 6143:      | 60         | 21 40 1 61 21 41 0 | 1304.7830500 | 1304.7836165 |
| -0.0005665 | -0.0003000 | 0.0000000          |              |              |
| 6144:      | 59         | 21 39 1 60 21 40 0 | 1305.0517000 | 1305.0513210 |
| 0.0003790  | -0.0003000 | 0.0000000          |              |              |
| 6145:      | 58         | 21 38 1 59 21 39 0 | 1305.3183300 | 1305.3189979 |
| -0.0006679 | -0.0003000 | 0.0000000          |              |              |
| 6146:      | 57         | 21 37 1 58 21 38 0 | 1305.5871100 | 1305.5866457 |
| 0.0004643  | -0.0003000 | 0.0000000          |              |              |
| 6147:      | 56         | 21 36 1 57 21 37 0 | 1305.8547700 | 1305.8542627 |
| 0.0005073  | -0.0003000 | 0.0000000          |              |              |
| 6148:      | 55         | 21 35 1 56 21 36 0 | 1306.1217100 | 1306.1218472 |
| -0.0001372 | -0.0003000 | 0.0000000          |              |              |
| 6149:      | 52         | 21 32 1 53 21 33 0 | 1306.9239600 | 1306.9243889 |
| -0.0004289 | -0.0003000 | 0.0000000          |              |              |
| 6150:      | 50         | 21 30 1 51 21 31 0 | 1307.4597400 | 1307.4592233 |
| 0.0005167  | -0.0003000 | 0.0000000          |              |              |
| 6151:      | 48         | 21 28 1 49 21 29 0 | 1307.9937200 | 1307.9938874 |
| -0.0001674 | -0.0003000 | 0.0000000          |              |              |
| 6152:      | 46         | 21 26 1 47 21 27 0 | 1308.5281200 | 1308.5283673 |
| -0.0002473 | -0.0003000 | 0.0000000          |              |              |
| 6153:      | 45         | 21 25 1 46 21 26 0 | 1308.7957000 | 1308.7955340 |
| 0.0001660  | -0.0003000 | 0.0000000          |              |              |
| 6154:      | 44         | 21 24 1 45 21 25 0 | 1309.0630200 | 1309.0626495 |
| 0.0003705  | -0.0003000 | 0.0000000          |              |              |
| 6155:      | 43         | 21 23 1 44 21 24 0 | 1309.3299500 | 1309.3297122 |
| 0.0002378  | -0.0003000 | 0.0000000          |              |              |
| 6156:      | 42         | 21 22 1 43 21 23 0 | 1309.5965100 | 1309.5967203 |
| -0.0002103 | -0.0003000 | 0.0000000          |              |              |
| 6157:      | 41         | 21 21 1 42 21 22 0 | 1309.8642900 | 1309.8636720 |
| 0.0006180  | -0.0003000 | 0.0000000          |              |              |
| 6158:      | 40         | 21 20 1 41 21 21 0 | 1310.1311400 | 1310.1305658 |
| 0.0005742  | -0.0003000 | 0.0000000          |              |              |
| 6159:      | 31         | 21 11 1 32 21 12 0 | 1312.5293900 | 1312.5297120 |
| -0.0003220 | -0.0003000 | 0.0000000          |              |              |
| 6160:      | 30         | 21 10 1 31 21 11 0 | 1312.7955400 | 1312.7959298 |
| -0.0003898 | -0.0003000 | 0.0000000          |              |              |
| 6161:      | 26         | 21 6 1 25 21 5 0   | 1327.7866000 | 1327.7871009 |
| -0.0005009 | -0.0003000 | 0.0000000          |              |              |
| 6162:      | 27         | 21 7 1 26 21 6 0   | 1328.0457100 | 1328.0458346 |
| -0.0001246 | -0.0003000 | 0.0000000          |              |              |
| 6163:      | 28         | 21 8 1 27 21 7 0   | 1328.3035500 | 1328.3043836 |
| -0.0008336 | -0.0003000 | 0.0000000          |              |              |
| 6164:      | 30         | 21 10 1 29 21 9 0  | 1328.8208900 | 1328.8209196 |
| -0.0000296 | -0.0003000 | 0.0000000          |              |              |
| 6165:      | 31         | 21 11 1 30 21 10 0 | 1329.0785400 | 1329.0789027 |
| -0.0003627 | -0.0003000 | 0.0000000          |              |              |
| 6166:      | 32         | 21 12 1 31 21 11 0 | 1329.3372000 | 1329.3366932 |
| 0.0005068  | -0.0003000 | 0.0000000          |              |              |
| 6167:      | 40         | 21 20 1 39 21 19 0 | 1331.3918000 | 1331.3918436 |
| -0.0000436 | -0.0003000 | 0.0000000          |              |              |
| 6168:      | 42         | 21 22 1 41 21 21 0 | 1331.9039000 | 1331.9035644 |
| 0.0003356  | -0.0003000 | 0.0000000          |              |              |
| 6169:      | 43         | 21 23 1 42 21 22 0 | 1332.1594800 | 1332.1591035 |
| 0.0003765  | -0.0003000 | 0.0000000          |              |              |
| 6170:      | 44         | 21 24 1 43 21 23 0 | 1332.4144200 | 1332.4144258 |
| -0.0000058 | -0.0003000 | 0.0000000          |              |              |
| 6171:      | 45         | 21 25 1 44 21 24 0 | 1332.6696500 | 1332.6695291 |
| 0.0001209  | -0.0003000 | 0.0000000          |              |              |
| 6172:      | 47         | 21 27 1 46 21 26 0 | 1333.1788600 | 1333.1790704 |
| -0.0002104 | -0.0003000 | 0.0000000          |              |              |

|            |            |           |    |   |    |    |    |   |              |              |
|------------|------------|-----------|----|---|----|----|----|---|--------------|--------------|
| 6173:      | 48         | 21        | 28 | 1 | 47 | 21 | 27 | 0 | 1333.4341400 | 1333.4335043 |
| 0.0006357  | -0.0003000 | 0.0000000 |    |   |    |    |    |   |              |              |
| 6174:      | 49         | 21        | 29 | 1 | 48 | 21 | 28 | 0 | 1333.6885700 | 1333.6877109 |
| 0.0008591  | -0.0003000 | 0.0000000 |    |   |    |    |    |   |              |              |
| 6175:      | 50         | 21        | 30 | 1 | 49 | 21 | 29 | 0 | 1333.9418400 | 1333.9416881 |
| 0.0001519  | -0.0003000 | 0.0000000 |    |   |    |    |    |   |              |              |
| 6176:      | 51         | 21        | 31 | 1 | 50 | 21 | 30 | 0 | 1334.1962500 | 1334.1954338 |
| 0.0008162  | -0.0003000 | 0.0000000 |    |   |    |    |    |   |              |              |
| 6177:      | 52         | 21        | 32 | 1 | 51 | 21 | 31 | 0 | 1334.4496300 | 1334.4489459 |
| 0.0006841  | -0.0003000 | 0.0000000 |    |   |    |    |    |   |              |              |
| 6178:      | 74         | 22        | 52 | 1 | 75 | 22 | 53 | 0 | 1300.5947800 | 1300.5941956 |
| 0.0005844  | -0.0003000 | 0.0000000 |    |   |    |    |    |   |              |              |
| 6179:      | 73         | 22        | 51 | 1 | 74 | 22 | 52 | 0 | 1300.8629800 | 1300.8621158 |
| 0.0008642  | -0.0003000 | 0.0000000 |    |   |    |    |    |   |              |              |
| 6180:      | 70         | 22        | 48 | 1 | 71 | 22 | 49 | 0 | 1301.6664800 | 1301.6658482 |
| 0.0006318  | -0.0003000 | 0.0000000 |    |   |    |    |    |   |              |              |
| 6181:      | 69         | 22        | 47 | 1 | 70 | 22 | 48 | 0 | 1301.9347300 | 1301.9337443 |
| 0.0009857  | -0.0003000 | 0.0000000 |    |   |    |    |    |   |              |              |
| 6182:      | 66         | 22        | 44 | 1 | 67 | 22 | 45 | 0 | 1302.7377400 | 1302.7373661 |
| 0.0003739  | -0.0003000 | 0.0000000 |    |   |    |    |    |   |              |              |
| 6183:      | 65         | 22        | 43 | 1 | 66 | 22 | 44 | 0 | 1303.0046400 | 1303.0052124 |
| -0.0005724 | -0.0003000 | 0.0000000 |    |   |    |    |    |   |              |              |
| 6184:      | 64         | 22        | 42 | 1 | 65 | 22 | 43 | 0 | 1303.2723600 | 1303.2730422 |
| -0.0006822 | -0.0003000 | 0.0000000 |    |   |    |    |    |   |              |              |
| 6185:      | 63         | 22        | 41 | 1 | 64 | 22 | 42 | 0 | 1303.5406500 | 1303.5408539 |
| -0.0002039 | -0.0003000 | 0.0000000 |    |   |    |    |    |   |              |              |
| 6186:      | 62         | 22        | 40 | 1 | 63 | 22 | 41 | 0 | 1303.8087500 | 1303.8086458 |
| 0.0001042  | -0.0003000 | 0.0000000 |    |   |    |    |    |   |              |              |
| 6187:      | 61         | 22        | 39 | 1 | 62 | 22 | 40 | 0 | 1304.0772200 | 1304.0764164 |
| 0.0008036  | -0.0003000 | 0.0000000 |    |   |    |    |    |   |              |              |
| 6188:      | 60         | 22        | 38 | 1 | 61 | 22 | 39 | 0 | 1304.3449000 | 1304.3441638 |
| 0.0007362  | -0.0003000 | 0.0000000 |    |   |    |    |    |   |              |              |
| 6189:      | 59         | 22        | 37 | 1 | 60 | 22 | 38 | 0 | 1304.6122700 | 1304.6118866 |
| 0.0003834  | -0.0003000 | 0.0000000 |    |   |    |    |    |   |              |              |
| 6190:      | 58         | 22        | 36 | 1 | 59 | 22 | 37 | 0 | 1304.8788600 | 1304.8795830 |
| -0.0007230 | -0.0003000 | 0.0000000 |    |   |    |    |    |   |              |              |
| 6191:      | 57         | 22        | 35 | 1 | 58 | 22 | 36 | 0 | 1305.1472200 | 1305.1472514 |
| -0.0000314 | -0.0003000 | 0.0000000 |    |   |    |    |    |   |              |              |
| 6192:      | 56         | 22        | 34 | 1 | 57 | 22 | 35 | 0 | 1305.4146300 | 1305.4148902 |
| -0.0002602 | -0.0003000 | 0.0000000 |    |   |    |    |    |   |              |              |
| 6193:      | 54         | 22        | 32 | 1 | 55 | 22 | 33 | 0 | 1305.9490500 | 1305.9500719 |
| -0.0010219 | -0.0003000 | 0.0000000 |    |   |    |    |    |   |              |              |
| 6194:      | 53         | 22        | 31 | 1 | 54 | 22 | 32 | 0 | 1306.2174000 | 1306.2176117 |
| -0.0002117 | -0.0003000 | 0.0000000 |    |   |    |    |    |   |              |              |
| 6195:      | 52         | 22        | 30 | 1 | 53 | 22 | 31 | 0 | 1306.4849000 | 1306.4851150 |
| -0.0002150 | -0.0003000 | 0.0000000 |    |   |    |    |    |   |              |              |
| 6196:      | 51         | 22        | 29 | 1 | 52 | 22 | 30 | 0 | 1306.7521300 | 1306.7525803 |
| -0.0004503 | -0.0003000 | 0.0000000 |    |   |    |    |    |   |              |              |
| 6197:      | 50         | 22        | 28 | 1 | 51 | 22 | 29 | 0 | 1307.0203400 | 1307.0200059 |
| 0.0003341  | -0.0003000 | 0.0000000 |    |   |    |    |    |   |              |              |
| 6198:      | 49         | 22        | 27 | 1 | 50 | 22 | 28 | 0 | 1307.2871200 | 1307.2873900 |
| -0.0002700 | -0.0003000 | 0.0000000 |    |   |    |    |    |   |              |              |
| 6199:      | 48         | 22        | 26 | 1 | 49 | 22 | 27 | 0 | 1307.5549200 | 1307.5547311 |
| 0.0001889  | -0.0003000 | 0.0000000 |    |   |    |    |    |   |              |              |
| 6200:      | 47         | 22        | 25 | 1 | 48 | 22 | 26 | 0 | 1307.8218700 | 1307.8220273 |
| -0.0001573 | -0.0003000 | 0.0000000 |    |   |    |    |    |   |              |              |
| 6201:      | 46         | 22        | 24 | 1 | 47 | 22 | 25 | 0 | 1308.0896700 | 1308.0892770 |
| 0.0003930  | -0.0003000 | 0.0000000 |    |   |    |    |    |   |              |              |
| 6202:      | 47         | 22        | 25 | 1 | 46 | 22 | 24 | 0 | 1332.7475200 | 1332.7476215 |
| -0.0001015 | -0.0003000 | 0.0000000 |    |   |    |    |    |   |              |              |
| 6203:      | 48         | 22        | 26 | 1 | 47 | 22 | 25 | 0 | 1333.0022100 | 1333.0021597 |
| 0.0000503  | -0.0003000 | 0.0000000 |    |   |    |    |    |   |              |              |
| 6204:      | 49         | 22        | 27 | 1 | 48 | 22 | 26 | 0 | 1333.2559500 | 1333.2564703 |
| -0.0005203 | -0.0003000 | 0.0000000 |    |   |    |    |    |   |              |              |
| 6205:      | 50         | 22        | 28 | 1 | 49 | 22 | 27 | 0 | 1333.5095500 | 1333.5105512 |

|              |            |           |            |              |
|--------------|------------|-----------|------------|--------------|
| -0.0010012   | -0.0003000 | 0.0000000 |            |              |
| 6206:        | 52         | 22 30     | 1 51 22 29 | 0            |
| 1334.0175900 |            |           |            | 1334.0180154 |
| -0.0004254   | -0.0003000 | 0.0000000 |            |              |
| 6207:        | 54         | 22 32     | 1 53 22 31 | 0            |
| 1334.5242300 |            |           |            | 1334.5245349 |
| -0.0003049   | -0.0003000 | 0.0000000 |            |              |
| 6208:        | 56         | 22 34     | 1 55 22 33 | 0            |
| 1335.0293900 |            |           |            | 1335.0300926 |
| -0.0007026   | -0.0003000 | 0.0000000 |            |              |
| 6209:        | 58         | 22 36     | 1 57 22 35 | 0            |
| 1335.5348900 |            |           |            | 1335.5346709 |
| 0.0002191    | -0.0003000 | 0.0000000 |            |              |
| 6210:        | 74         | 22 53     | 1 75 22 54 | 0            |
| 1300.5947800 |            |           |            | 1300.5941956 |
| 0.0005844    | -0.0003000 | 0.0000000 |            |              |
| 6211:        | 73         | 22 52     | 1 74 22 53 | 0            |
| 1300.8629800 |            |           |            | 1300.8621158 |
| 0.0008642    | -0.0003000 | 0.0000000 |            |              |
| 6212:        | 70         | 22 49     | 1 71 22 50 | 0            |
| 1301.6664800 |            |           |            | 1301.6658482 |
| 0.0006318    | -0.0003000 | 0.0000000 |            |              |
| 6213:        | 69         | 22 48     | 1 70 22 49 | 0            |
| 1301.9347300 |            |           |            | 1301.9337443 |
| 0.0009857    | -0.0003000 | 0.0000000 |            |              |
| 6214:        | 66         | 22 45     | 1 67 22 46 | 0            |
| 1302.7377400 |            |           |            | 1302.7373661 |
| 0.0003739    | -0.0003000 | 0.0000000 |            |              |
| 6215:        | 65         | 22 44     | 1 66 22 45 | 0            |
| 1303.0046400 |            |           |            | 1303.0052124 |
| -0.0005724   | -0.0003000 | 0.0000000 |            |              |
| 6216:        | 64         | 22 43     | 1 65 22 44 | 0            |
| 1303.2723600 |            |           |            | 1303.2730422 |
| -0.0006822   | -0.0003000 | 0.0000000 |            |              |
| 6217:        | 63         | 22 42     | 1 64 22 43 | 0            |
| 1303.5406500 |            |           |            | 1303.5408539 |
| -0.0002039   | -0.0003000 | 0.0000000 |            |              |
| 6218:        | 62         | 22 41     | 1 63 22 42 | 0            |
| 1303.8087500 |            |           |            | 1303.8086458 |
| 0.0001042    | -0.0003000 | 0.0000000 |            |              |
| 6219:        | 61         | 22 40     | 1 62 22 41 | 0            |
| 1304.0772200 |            |           |            | 1304.0764164 |
| 0.0008036    | -0.0003000 | 0.0000000 |            |              |
| 6220:        | 60         | 22 39     | 1 61 22 40 | 0            |
| 1304.3449000 |            |           |            | 1304.3441638 |
| 0.0007362    | -0.0003000 | 0.0000000 |            |              |
| 6221:        | 59         | 22 38     | 1 60 22 39 | 0            |
| 1304.6122700 |            |           |            | 1304.6118866 |
| 0.0003834    | -0.0003000 | 0.0000000 |            |              |
| 6222:        | 58         | 22 37     | 1 59 22 38 | 0            |
| 1304.8788600 |            |           |            | 1304.8795830 |
| -0.0007230   | -0.0003000 | 0.0000000 |            |              |
| 6223:        | 57         | 22 36     | 1 58 22 37 | 0            |
| 1305.1472200 |            |           |            | 1305.1472514 |
| -0.0000314   | -0.0003000 | 0.0000000 |            |              |
| 6224:        | 56         | 22 35     | 1 57 22 36 | 0            |
| 1305.4146300 |            |           |            | 1305.4148902 |
| -0.0002602   | -0.0003000 | 0.0000000 |            |              |
| 6225:        | 54         | 22 33     | 1 55 22 34 | 0            |
| 1305.9490500 |            |           |            | 1305.9500719 |
| -0.0010219   | -0.0003000 | 0.0000000 |            |              |
| 6226:        | 53         | 22 32     | 1 54 22 33 | 0            |
| 1306.2174000 |            |           |            | 1306.2176117 |
| -0.0002117   | -0.0003000 | 0.0000000 |            |              |
| 6227:        | 52         | 22 31     | 1 53 22 32 | 0            |
| 1306.4849000 |            |           |            | 1306.4851150 |
| -0.0002150   | -0.0003000 | 0.0000000 |            |              |
| 6228:        | 51         | 22 30     | 1 52 22 31 | 0            |
| 1306.7521300 |            |           |            | 1306.7525803 |
| -0.0004503   | -0.0003000 | 0.0000000 |            |              |
| 6229:        | 50         | 22 29     | 1 51 22 30 | 0            |
| 1307.0203400 |            |           |            | 1307.0200059 |
| 0.0003341    | -0.0003000 | 0.0000000 |            |              |
| 6230:        | 49         | 22 28     | 1 50 22 29 | 0            |
| 1307.2871200 |            |           |            | 1307.2873900 |
| -0.0002700   | -0.0003000 | 0.0000000 |            |              |
| 6231:        | 48         | 22 27     | 1 49 22 28 | 0            |
| 1307.5549200 |            |           |            | 1307.5547311 |
| 0.0001889    | -0.0003000 | 0.0000000 |            |              |
| 6232:        | 47         | 22 26     | 1 48 22 27 | 0            |
| 1307.8218700 |            |           |            | 1307.8220273 |
| -0.0001573   | -0.0003000 | 0.0000000 |            |              |
| 6233:        | 46         | 22 25     | 1 47 22 26 | 0            |
| 1308.0896700 |            |           |            | 1308.0892770 |
| 0.0003930    | -0.0003000 | 0.0000000 |            |              |
| 6234:        | 47         | 22 26     | 1 46 22 25 | 0            |
| 1332.7475200 |            |           |            | 1332.7476215 |
| -0.0001015   | -0.0003000 | 0.0000000 |            |              |
| 6235:        | 48         | 22 27     | 1 47 22 26 | 0            |
| 1333.0022100 |            |           |            | 1333.0021597 |
| 0.0000503    | -0.0003000 | 0.0000000 |            |              |
| 6236:        | 49         | 22 28     | 1 48 22 27 | 0            |
| 1333.2559500 |            |           |            | 1333.2564703 |
| -0.0005203   | -0.0003000 | 0.0000000 |            |              |
| 6237:        | 50         | 22 29     | 1 49 22 28 | 0            |
| 1333.5095500 |            |           |            | 1333.5105512 |
| -0.0010012   | -0.0003000 | 0.0000000 |            |              |

|            |            |           |    |   |    |    |    |   |              |              |
|------------|------------|-----------|----|---|----|----|----|---|--------------|--------------|
| 6238:      | 52         | 22        | 31 | 1 | 51 | 22 | 30 | 0 | 1334.0175900 | 1334.0180154 |
| -0.0004254 | -0.0003000 | 0.0000000 |    |   |    |    |    |   |              |              |
| 6239:      | 54         | 22        | 33 | 1 | 53 | 22 | 32 | 0 | 1334.5242300 | 1334.5245349 |
| -0.0003049 | -0.0003000 | 0.0000000 |    |   |    |    |    |   |              |              |
| 6240:      | 56         | 22        | 35 | 1 | 55 | 22 | 34 | 0 | 1335.0293900 | 1335.0300926 |
| -0.0007026 | -0.0003000 | 0.0000000 |    |   |    |    |    |   |              |              |
| 6241:      | 58         | 22        | 37 | 1 | 57 | 22 | 36 | 0 | 1335.5348900 | 1335.5346709 |
| 0.0002191  | -0.0003000 | 0.0000000 |    |   |    |    |    |   |              |              |
| 6242:      | 66         | 23        | 43 | 1 | 67 | 23 | 44 | 0 | 1302.2792700 | 1302.2790724 |
| 0.0001976  | -0.0003000 | 0.0000000 |    |   |    |    |    |   |              |              |
| 6243:      | 65         | 23        | 42 | 1 | 66 | 23 | 43 | 0 | 1302.5468300 | 1302.5469314 |
| -0.0001014 | -0.0003000 | 0.0000000 |    |   |    |    |    |   |              |              |
| 6244:      | 64         | 23        | 41 | 1 | 65 | 23 | 42 | 0 | 1302.8144100 | 1302.8147749 |
| -0.0003649 | -0.0003000 | 0.0000000 |    |   |    |    |    |   |              |              |
| 6245:      | 59         | 23        | 36 | 1 | 60 | 23 | 37 | 0 | 1304.1540000 | 1304.1537043 |
| 0.0002957  | -0.0003000 | 0.0000000 |    |   |    |    |    |   |              |              |
| 6246:      | 55         | 23        | 32 | 1 | 56 | 23 | 33 | 0 | 1305.2240500 | 1305.2244035 |
| -0.0003535 | -0.0003000 | 0.0000000 |    |   |    |    |    |   |              |              |
| 6247:      | 54         | 23        | 31 | 1 | 55 | 23 | 32 | 0 | 1305.4921600 | 1305.4920029 |
| 0.0001571  | -0.0003000 | 0.0000000 |    |   |    |    |    |   |              |              |
| 6248:      | 53         | 23        | 30 | 1 | 54 | 23 | 31 | 0 | 1305.7598400 | 1305.7595687 |
| 0.0002713  | -0.0003000 | 0.0000000 |    |   |    |    |    |   |              |              |
| 6249:      | 52         | 23        | 29 | 1 | 53 | 23 | 30 | 0 | 1306.0268300 | 1306.0270994 |
| -0.0002694 | -0.0003000 | 0.0000000 |    |   |    |    |    |   |              |              |
| 6250:      | 51         | 23        | 28 | 1 | 52 | 23 | 29 | 0 | 1306.2948200 | 1306.2945932 |
| 0.0002268  | -0.0003000 | 0.0000000 |    |   |    |    |    |   |              |              |
| 6251:      | 49         | 23        | 26 | 1 | 50 | 23 | 27 | 0 | 1306.8298600 | 1306.8294634 |
| 0.0003966  | -0.0003000 | 0.0000000 |    |   |    |    |    |   |              |              |
| 6252:      | 46         | 23        | 23 | 1 | 47 | 23 | 24 | 0 | 1307.6309500 | 1307.6314502 |
| -0.0005002 | -0.0003000 | 0.0000000 |    |   |    |    |    |   |              |              |
| 6253:      | 45         | 23        | 22 | 1 | 46 | 23 | 23 | 0 | 1307.8990100 | 1307.8986874 |
| 0.0003226  | -0.0003000 | 0.0000000 |    |   |    |    |    |   |              |              |
| 6254:      | 44         | 23        | 21 | 1 | 45 | 23 | 22 | 0 | 1308.1661500 | 1308.1658758 |
| 0.0002742  | -0.0003000 | 0.0000000 |    |   |    |    |    |   |              |              |
| 6255:      | 42         | 23        | 19 | 1 | 43 | 23 | 20 | 0 | 1308.6997800 | 1308.7000998 |
| -0.0003198 | -0.0003000 | 0.0000000 |    |   |    |    |    |   |              |              |
| 6256:      | 41         | 23        | 18 | 1 | 42 | 23 | 19 | 0 | 1308.9667000 | 1308.9671318 |
| -0.0004318 | -0.0003000 | 0.0000000 |    |   |    |    |    |   |              |              |
| 6257:      | 39         | 23        | 16 | 1 | 40 | 23 | 17 | 0 | 1309.5014600 | 1309.5010274 |
| 0.0004326  | -0.0003000 | 0.0000000 |    |   |    |    |    |   |              |              |
| 6258:      | 37         | 23        | 14 | 1 | 38 | 23 | 15 | 0 | 1310.0347500 | 1310.0346869 |
| 0.0000631  | -0.0003000 | 0.0000000 |    |   |    |    |    |   |              |              |
| 6259:      | 36         | 23        | 13 | 1 | 37 | 23 | 14 | 0 | 1310.3019500 | 1310.3014238 |
| 0.0005262  | -0.0003000 | 0.0000000 |    |   |    |    |    |   |              |              |
| 6260:      | 31         | 23        | 8  | 1 | 30 | 23 | 7  | 0 | 1328.1944800 | 1328.1940286 |
| 0.0004514  | -0.0003000 | 0.0000000 |    |   |    |    |    |   |              |              |
| 6261:      | 33         | 23        | 10 | 1 | 32 | 23 | 9  | 0 | 1328.7103600 | 1328.7098442 |
| 0.0005158  | -0.0003000 | 0.0000000 |    |   |    |    |    |   |              |              |
| 6262:      | 34         | 23        | 11 | 1 | 33 | 23 | 10 | 0 | 1328.9673000 | 1328.9674589 |
| -0.0001589 | -0.0003000 | 0.0000000 |    |   |    |    |    |   |              |              |
| 6263:      | 35         | 23        | 12 | 1 | 34 | 23 | 11 | 0 | 1329.2245200 | 1329.2248753 |
| -0.0003553 | -0.0003000 | 0.0000000 |    |   |    |    |    |   |              |              |
| 6264:      | 37         | 23        | 14 | 1 | 36 | 23 | 13 | 0 | 1329.7385800 | 1329.7391052 |
| -0.0005252 | -0.0003000 | 0.0000000 |    |   |    |    |    |   |              |              |
| 6265:      | 39         | 23        | 16 | 1 | 38 | 23 | 15 | 0 | 1330.2520800 | 1330.2525175 |
| -0.0004375 | -0.0003000 | 0.0000000 |    |   |    |    |    |   |              |              |
| 6266:      | 40         | 23        | 17 | 1 | 39 | 23 | 16 | 0 | 1330.5094100 | 1330.5089118 |
| 0.0004982  | -0.0003000 | 0.0000000 |    |   |    |    |    |   |              |              |
| 6267:      | 44         | 23        | 21 | 1 | 43 | 23 | 20 | 0 | 1331.5322800 | 1331.5323615 |
| -0.0000815 | -0.0003000 | 0.0000000 |    |   |    |    |    |   |              |              |
| 6268:      | 45         | 23        | 22 | 1 | 44 | 23 | 21 | 0 | 1331.7882300 | 1331.7876814 |
| 0.0005486  | -0.0003000 | 0.0000000 |    |   |    |    |    |   |              |              |
| 6269:      | 46         | 23        | 23 | 1 | 45 | 23 | 22 | 0 | 1332.0427300 | 1332.0427802 |
| -0.0000502 | -0.0003000 | 0.0000000 |    |   |    |    |    |   |              |              |
| 6270:      | 47         | 23        | 24 | 1 | 46 | 23 | 23 | 0 | 1332.2971700 | 1332.2976555 |

|            |            |           |   |    |    |    |   |              |              |
|------------|------------|-----------|---|----|----|----|---|--------------|--------------|
| -0.0004855 | -0.0003000 | 0.0000000 |   |    |    |    |   |              |              |
| 6271: 49   | 23         | 26        | 1 | 48 | 23 | 25 | 0 | 1332.8067200 | 1332.8067276 |
| -0.0000076 | -0.0003000 | 0.0000000 |   |    |    |    |   |              |              |
| 6272: 50   | 23         | 27        | 1 | 49 | 23 | 26 | 0 | 1333.0609200 | 1333.0609201 |
| -0.0000001 | -0.0003000 | 0.0000000 |   |    |    |    |   |              |              |
| 6273: 66   | 23         | 44        | 1 | 67 | 23 | 45 | 0 | 1302.2792700 | 1302.2790724 |
| 0.0001976  | -0.0003000 | 0.0000000 |   |    |    |    |   |              |              |
| 6274: 65   | 23         | 43        | 1 | 66 | 23 | 44 | 0 | 1302.5468300 | 1302.5469314 |
| -0.0001014 | -0.0003000 | 0.0000000 |   |    |    |    |   |              |              |
| 6275: 64   | 23         | 42        | 1 | 65 | 23 | 43 | 0 | 1302.8144100 | 1302.8147749 |
| -0.0003649 | -0.0003000 | 0.0000000 |   |    |    |    |   |              |              |
| 6276: 59   | 23         | 37        | 1 | 60 | 23 | 38 | 0 | 1304.1540000 | 1304.1537043 |
| 0.0002957  | -0.0003000 | 0.0000000 |   |    |    |    |   |              |              |
| 6277: 55   | 23         | 33        | 1 | 56 | 23 | 34 | 0 | 1305.2240500 | 1305.2244035 |
| -0.0003535 | -0.0003000 | 0.0000000 |   |    |    |    |   |              |              |
| 6278: 54   | 23         | 32        | 1 | 55 | 23 | 33 | 0 | 1305.4921600 | 1305.4920029 |
| 0.0001571  | -0.0003000 | 0.0000000 |   |    |    |    |   |              |              |
| 6279: 53   | 23         | 31        | 1 | 54 | 23 | 32 | 0 | 1305.7598400 | 1305.7595687 |
| 0.0002713  | -0.0003000 | 0.0000000 |   |    |    |    |   |              |              |
| 6280: 52   | 23         | 30        | 1 | 53 | 23 | 31 | 0 | 1306.0268300 | 1306.0270994 |
| -0.0002694 | -0.0003000 | 0.0000000 |   |    |    |    |   |              |              |
| 6281: 51   | 23         | 29        | 1 | 52 | 23 | 30 | 0 | 1306.2948200 | 1306.2945932 |
| 0.0002268  | -0.0003000 | 0.0000000 |   |    |    |    |   |              |              |
| 6282: 49   | 23         | 27        | 1 | 50 | 23 | 28 | 0 | 1306.8298600 | 1306.8294634 |
| 0.0003966  | -0.0003000 | 0.0000000 |   |    |    |    |   |              |              |
| 6283: 46   | 23         | 24        | 1 | 47 | 23 | 25 | 0 | 1307.6309500 | 1307.6314502 |
| -0.0005002 | -0.0003000 | 0.0000000 |   |    |    |    |   |              |              |
| 6284: 45   | 23         | 23        | 1 | 46 | 23 | 24 | 0 | 1307.8990100 | 1307.8986874 |
| 0.0003226  | -0.0003000 | 0.0000000 |   |    |    |    |   |              |              |
| 6285: 44   | 23         | 22        | 1 | 45 | 23 | 23 | 0 | 1308.1661500 | 1308.1658758 |
| 0.0002742  | -0.0003000 | 0.0000000 |   |    |    |    |   |              |              |
| 6286: 42   | 23         | 20        | 1 | 43 | 23 | 21 | 0 | 1308.6997800 | 1308.7000998 |
| -0.0003198 | -0.0003000 | 0.0000000 |   |    |    |    |   |              |              |
| 6287: 41   | 23         | 19        | 1 | 42 | 23 | 20 | 0 | 1308.9667000 | 1308.9671318 |
| -0.0004318 | -0.0003000 | 0.0000000 |   |    |    |    |   |              |              |
| 6288: 39   | 23         | 17        | 1 | 40 | 23 | 18 | 0 | 1309.5014600 | 1309.5010274 |
| 0.0004326  | -0.0003000 | 0.0000000 |   |    |    |    |   |              |              |
| 6289: 37   | 23         | 15        | 1 | 38 | 23 | 16 | 0 | 1310.0347500 | 1310.0346869 |
| 0.0000631  | -0.0003000 | 0.0000000 |   |    |    |    |   |              |              |
| 6290: 36   | 23         | 14        | 1 | 37 | 23 | 15 | 0 | 1310.3019500 | 1310.3014238 |
| 0.0005262  | -0.0003000 | 0.0000000 |   |    |    |    |   |              |              |
| 6291: 31   | 23         | 9         | 1 | 30 | 23 | 8  | 0 | 1328.1944800 | 1328.1940286 |
| 0.0004514  | -0.0003000 | 0.0000000 |   |    |    |    |   |              |              |
| 6292: 33   | 23         | 11        | 1 | 32 | 23 | 10 | 0 | 1328.7103600 | 1328.7098442 |
| 0.0005158  | -0.0003000 | 0.0000000 |   |    |    |    |   |              |              |
| 6293: 34   | 23         | 12        | 1 | 33 | 23 | 11 | 0 | 1328.9673000 | 1328.9674589 |
| -0.0001589 | -0.0003000 | 0.0000000 |   |    |    |    |   |              |              |
| 6294: 35   | 23         | 13        | 1 | 34 | 23 | 12 | 0 | 1329.2245200 | 1329.2248753 |
| -0.0003553 | -0.0003000 | 0.0000000 |   |    |    |    |   |              |              |
| 6295: 37   | 23         | 15        | 1 | 36 | 23 | 14 | 0 | 1329.7385800 | 1329.7391052 |
| -0.0005252 | -0.0003000 | 0.0000000 |   |    |    |    |   |              |              |
| 6296: 39   | 23         | 17        | 1 | 38 | 23 | 16 | 0 | 1330.2520800 | 1330.2525175 |
| -0.0004375 | -0.0003000 | 0.0000000 |   |    |    |    |   |              |              |
| 6297: 40   | 23         | 18        | 1 | 39 | 23 | 17 | 0 | 1330.5094100 | 1330.5089118 |
| 0.0004982  | -0.0003000 | 0.0000000 |   |    |    |    |   |              |              |
| 6298: 44   | 23         | 22        | 1 | 43 | 23 | 21 | 0 | 1331.5322800 | 1331.5323615 |
| -0.0000815 | -0.0003000 | 0.0000000 |   |    |    |    |   |              |              |
| 6299: 45   | 23         | 23        | 1 | 44 | 23 | 22 | 0 | 1331.7882300 | 1331.7876814 |
| 0.0005486  | -0.0003000 | 0.0000000 |   |    |    |    |   |              |              |
| 6300: 46   | 23         | 24        | 1 | 45 | 23 | 23 | 0 | 1332.0427300 | 1332.0427802 |
| -0.0000502 | -0.0003000 | 0.0000000 |   |    |    |    |   |              |              |
| 6301: 47   | 23         | 25        | 1 | 46 | 23 | 24 | 0 | 1332.2971700 | 1332.2976555 |
| -0.0004855 | -0.0003000 | 0.0000000 |   |    |    |    |   |              |              |
| 6302: 49   | 23         | 27        | 1 | 48 | 23 | 26 | 0 | 1332.8067200 | 1332.8067276 |
| -0.0000076 | -0.0003000 | 0.0000000 |   |    |    |    |   |              |              |

6303: 50 23 28 1 49 23 27 0 1333.0609200 1333.0609201  
-0.0000001 -0.0003000 0.0000000  
NORMALIZED DIAGONAL:  
1 4.83919E-002 2 3.75545E-001 3 3.28764E-001 4  
1.56460E-001 5 8.73438E-003 6 1.00000E+000  
7 4.69145E-002 8 9.24377E-001 9 3.75443E-002 10  
2.44655E-001 11 3.07832E-003 12 7.23382E-001  
13 1.92281E-001 14 5.63008E-002 15 8.94818E-002 16  
6.58279E-003 17 8.24293E-002 18 2.04901E-002  
19 9.99893E-001 20 1.75384E-002 21 6.45145E-001 22  
1.94572E-002 23 1.06682E-001 24 9.90330E-001  
25 9.67464E-001

MARQUARDT PARAMETER = 0, TRUST EXPANSION = 1.00  
NEW PARAMETER (EST. ERROR) -- CHANGE

| THIS ITERATION |       |       | NEW PARAMETER (EST. ERROR) | CHANGE     |
|----------------|-------|-------|----------------------------|------------|
| 1              | 10000 | A     | 41723.4365(246)            | 0.0000     |
| 2              | 20000 | B     | 4114.24394(258)            | -0.00000   |
| 3              | 30000 | C     | 3738.58308(242)            | 0.00000    |
| 4              | 200   | -DJ   | -2.63566( 91)E-03          |            |
| 0.00000E-03    |       |       |                            |            |
| 5              | 1100  | -DJK  | 0.0397888(255)             | -0.0000000 |
| 6              | 2000  | -DK   | -1.66585( 33)              | -0.00000   |
| 7              | 40100 | -delj | -0.362778(160)E-03         |            |
| 0.000000E-03   |       |       |                            |            |
| 8              | 41000 | -delk | -0.018390(177)             | 0.000000   |
| 9              | 1200  | HJK   | 0.05130(216)E-06           |            |
| -0.00000E-06   |       |       |                            |            |
| 10             | 2100  | HKJ   | -9.987( 55)E-06            |            |
| 0.000E-06      |       |       |                            |            |
| 11             | 3000  | HK    | 0.28492(142)E-03           |            |
| 0.00000E-03    |       |       |                            |            |
| 12             | 11    | E     | 39739681.00( 41)           | 0.00       |
| 13             | 10011 | A     | 41403.7555(259)            | 0.0000     |
| 14             | 20011 | B     | 4113.24183(264)            | -0.00000   |
| 15             | 30011 | C     | 3735.32703(248)            | 0.00000    |
| 16             | 211   | -DJ   | -2.64589( 91)E-03          |            |
| 0.00000E-03    |       |       |                            |            |
| 17             | 1111  | -DJK  | 0.0400651(260)             | -0.0000000 |
| 18             | 2011  | -DK   | -1.64902( 34)              | -0.00000   |
| 19             | 40111 | -delj | -0.367111(159)E-03         |            |
| 0.000000E-03   |       |       |                            |            |
| 20             | 41011 | -delk | -0.018384(173)             | 0.000000   |
| 21             | 1211  | HJK   | 0.05131(217)E-06           |            |
| -0.00000E-06   |       |       |                            |            |
| 22             | 2111  | HKJ   | -9.949( 56)E-06            |            |
| 0.000E-06      |       |       |                            |            |
| 23             | 3011  | HK    | 0.28164(143)E-03           |            |
| 0.00000E-03    |       |       |                            |            |
| 24             | 300   | HJ    | 0.698( 64)E-09             |            |
| 0.000E-09      |       |       |                            |            |
| 25             | 4000  | -LK   | -0.05612(175)E-06          |            |
| -0.00000E-06   |       |       |                            |            |

MICROWAVE AVG = -0.016920 MHz, IR AVG = -0.00000  
 MICROWAVE RMS = 0.367410 MHz, IR RMS = 0.00027  
 END OF ITERATION 1 OLD, NEW RMS ERROR= 0.92372 0.92372

|           |    |           |           |    |           |           |    |           |           |    |           |    |    |
|-----------|----|-----------|-----------|----|-----------|-----------|----|-----------|-----------|----|-----------|----|----|
| 1         | 2  | 0.808727  | 1         | 3  | 0.847803  | 1         | 4  | -0.419784 | 1         | 5  | -0.255208 | 1  | 6  |
| -0.488303 | 1  | 7         | 0.056411  | 1  | 8         | 0.016866  | 1  | 9         | 0.210378  |    |           |    |    |
| 1         | 10 | 0.136530  | 1         | 11 | 0.338928  | 1         | 12 | -0.072440 | 1         | 13 | 0.958981  | 1  | 14 |
| 0.792937  | 1  | 15        | 0.835011  | 1  | 16        | -0.421774 | 1  | 17        | -0.251762 |    |           |    |    |
| 1         | 18 | -0.482573 | 1         | 19 | 0.058002  | 1         | 20 | 0.016023  | 1         | 21 | 0.207867  | 1  | 22 |
| 0.136085  | 1  | 23        | 0.337651  | 1  | 24        | 0.345168  | 1  | 25        | -0.280640 |    |           |    |    |
| 2         | 1  | 0.808727  | 2         | 3  | 0.928451  | 2         | 4  | -0.651370 | 2         | 5  | -0.129369 | 2  | 6  |
| -0.410555 | 2  | 7         | -0.020251 | 2  | 8         | -0.158945 | 2  | 9         | 0.202882  |    |           |    |    |
| 2         | 10 | 0.036783  | 2         | 11 | 0.285779  | 2         | 12 | -0.054137 | 2         | 13 | 0.770538  | 2  | 14 |
| 0.976666  | 2  | 15        | 0.912951  | 2  | 16        | -0.651885 | 2  | 17        | -0.126314 |    |           |    |    |
| 2         | 18 | -0.403777 | 2         | 19 | -0.018629 | 2         | 20 | -0.159645 | 2         | 21 | 0.199205  | 2  | 22 |
| 0.036166  | 2  | 23        | 0.284172  | 2  | 24        | 0.500402  | 2  | 25        | -0.232613 |    |           |    |    |
| 3         | 1  | 0.847803  | 3         | 2  | 0.928451  | 3         | 4  | -0.512256 | 3         | 5  | -0.116820 | 3  | 6  |
| -0.449309 | 3  | 7         | 0.121153  | 3  | 8         | 0.179853  | 3  | 9         | 0.162663  |    |           |    |    |
| 3         | 10 | 0.001559  | 3         | 11 | 0.315783  | 3         | 12 | -0.060193 | 3         | 13 | 0.805542  | 3  | 14 |
| 0.906989  | 3  | 15        | 0.985806  | 3  | 16        | -0.515351 | 3  | 17        | -0.114717 |    |           |    |    |
| 3         | 18 | -0.440278 | 3         | 19 | 0.128064  | 3         | 20 | 0.178220  | 3         | 21 | 0.160179  | 3  | 22 |
| 0.002329  | 3  | 23        | 0.313405  | 3  | 24        | 0.518927  | 3  | 25        | -0.256027 |    |           |    |    |
| 4         | 1  | -0.419784 | 4         | 2  | -0.651370 | 4         | 3  | -0.512256 | 4         | 5  | -0.235873 | 4  | 6  |
| 0.327769  | 4  | 7         | 0.009157  | 4  | 8         | 0.475353  | 4  | 9         | -0.146549 |    |           |    |    |
| 4         | 10 | 0.170954  | 4         | 11 | -0.239979 | 4         | 12 | 0.025183  | 4         | 13 | -0.395589 | 4  | 14 |
| -0.633535 | 4  | 15        | -0.505682 | 4  | 16        | 0.998772  | 4  | 17        | -0.231983 |    |           |    |    |
| 4         | 18 | 0.320239  | 4         | 19 | 0.007535  | 4         | 20 | 0.476344  | 4         | 21 | -0.146402 | 4  | 22 |
| 0.169558  | 4  | 23        | -0.238203 | 4  | 24        | -0.858772 | 4  | 25        | 0.193909  |    |           |    |    |
| 5         | 1  | -0.255208 | 5         | 2  | -0.129369 | 5         | 3  | -0.116820 | 5         | 4  | -0.235873 | 5  | 6  |
| -0.358553 | 5  | 7         | -0.003838 | 5  | 8         | -0.062270 | 5  | 9         | -0.474881 |    |           |    |    |
| 5         | 10 | -0.812248 | 5         | 11 | 0.338794  | 5         | 12 | 0.090593  | 5         | 13 | -0.285004 | 5  | 14 |
| -0.144267 | 5  | 15        | -0.118091 | 5  | 16        | -0.231633 | 5  | 17        | 0.994480  |    |           |    |    |
| 5         | 18 | -0.335645 | 5         | 19 | 0.006482  | 5         | 20 | -0.061158 | 5         | 21 | -0.478272 | 5  | 22 |
| -0.811141 | 5  | 23        | 0.332446  | 5  | 24        | 0.272667  | 5  | 25        | -0.281355 |    |           |    |    |
| 6         | 1  | -0.488303 | 6         | 2  | -0.410555 | 6         | 3  | -0.449309 | 6         | 4  | 0.327769  | 6  | 5  |
| -0.358553 | 6  | 7         | -0.011880 | 6  | 8         | -0.020171 | 6  | 9         | 0.087232  |    |           |    |    |
| 6         | 10 | 0.354778  | 6         | 11 | -0.959860 | 6         | 12 | -0.002120 | 6         | 13 | -0.486516 | 6  | 14 |
| -0.391313 | 6  | 15        | -0.441162 | 6  | 16        | 0.326970  | 6  | 17        | -0.358804 |    |           |    |    |
| 6         | 18 | 0.994393  | 6         | 19 | -0.018388 | 6         | 20 | -0.020536 | 6         | 21 | 0.093133  | 6  | 22 |
| 0.352556  | 6  | 23        | -0.958410 | 6  | 24        | -0.304481 | 6  | 25        | 0.901559  |    |           |    |    |
| 7         | 1  | 0.056411  | 7         | 2  | -0.020251 | 7         | 3  | 0.121153  | 7         | 4  | 0.009157  | 7  | 5  |
| -0.003838 | 7  | 6         | -0.011880 | 7  | 8         | 0.153502  | 7  | 9         | -0.299313 |    |           |    |    |
| 7         | 10 | 0.122709  | 7         | 11 | -0.016922 | 7         | 12 | -0.001028 | 7         | 13 | 0.047556  | 7  | 14 |
| -0.005319 | 7  | 15        | 0.107988  | 7  | 16        | 0.004663  | 7  | 17        | -0.004543 |    |           |    |    |
| 7         | 18 | -0.008472 | 7         | 19 | 0.981298  | 7         | 20 | 0.147957  | 7         | 21 | -0.293735 | 7  | 22 |
| 0.119320  | 7  | 23        | -0.017707 | 7  | 24        | 0.204493  | 7  | 25        | 0.018097  |    |           |    |    |
| 8         | 1  | 0.016866  | 8         | 2  | -0.158945 | 8         | 3  | 0.179853  | 8         | 4  | 0.475353  | 8  | 5  |
| -0.062270 | 8  | 6         | -0.020171 | 8  | 7         | 0.153502  | 8  | 9         | -0.015242 |    |           |    |    |
| 8         | 10 | -0.058531 | 8         | 11 | 0.023989  | 8         | 12 | -0.019265 | 8         | 13 | 0.014736  | 8  | 14 |
| -0.157024 | 8  | 15        | 0.186949  | 8  | 16        | 0.468363  | 8  | 17        | -0.063880 |    |           |    |    |
| 8         | 18 | -0.017471 | 8         | 19 | 0.172887  | 8         | 20 | 0.998401  | 8         | 21 | -0.013134 | 8  | 22 |
| -0.053839 | 8  | 23        | 0.022691  | 8  | 24        | -0.063270 | 8  | 25        | -0.018388 |    |           |    |    |
| 9         | 1  | 0.210378  | 9         | 2  | 0.202882  | 9         | 3  | 0.162663  | 9         | 4  | -0.146549 | 9  | 5  |
| -0.474881 | 9  | 6         | 0.087232  | 9  | 7         | -0.299313 | 9  | 8         | -0.015242 |    |           |    |    |
| 9         | 10 | 0.009096  | 9         | 11 | -0.034207 | 9         | 12 | -0.055812 | 9         | 13 | 0.229576  | 9  | 14 |
| 0.202173  | 9  | 15        | 0.162305  | 9  | 16        | -0.145562 | 9  | 17        | -0.471565 |    |           |    |    |
| 9         | 18 | 0.073366  | 9         | 19 | -0.298534 | 9         | 20 | -0.012694 | 9         | 21 | 0.989684  | 9  | 22 |
| 0.020005  | 9  | 23        | -0.031101 | 9  | 24        | -0.020365 | 9  | 25        | 0.021367  |    |           |    |    |
| 10        | 1  | 0.136530  | 10        | 2  | 0.036783  | 10        | 3  | 0.001559  | 10        | 4  | 0.170954  | 10 | 5  |
| -0.812248 | 10 | 6         | 0.354778  | 10 | 7         | 0.122709  | 10 | 8         | -0.058531 |    |           |    |    |
| 10        | 9  | 0.009096  | 10        | 11 | -0.385583 | 10        | 12 | -0.087156 | 10        | 13 | 0.170090  | 10 | 14 |
| 0.056302  | 10 | 15        | 0.005283  | 10 | 16        | 0.166046  | 10 | 17        | -0.815213 |    |           |    |    |
| 10        | 18 | 0.334160  | 10        | 19 | 0.109715  | 10        | 20 | -0.061122 | 10        | 21 | 0.023461  | 10 | 22 |
| 0.996889  | 10 | 23        | -0.379417 | 10 | 24        | -0.163134 | 10 | 25        | 0.329433  |    |           |    |    |
| 11        | 1  | 0.338928  | 11        | 2  | 0.285779  | 11        | 3  | 0.315783  | 11        | 4  | -0.239979 | 11 | 5  |
| 0.338794  | 11 | 6         | -0.959860 | 11 | 7         | -0.016922 | 11 | 8         | 0.023989  |    |           |    |    |

11 9 -0.034207 11 10 -0.385583 11 12 0.021180 11 13 0.343951 11 14  
0.269296 11 15 0.308885 11 16 -0.238980 11 17 0.341012  
11 18 -0.956922 11 19 -0.011899 11 20 0.024713 11 21 -0.040009 11 22  
-0.384906 11 23 0.999433 11 24 0.217306 11 25 -0.982342  
12 1 -0.072440 12 2 -0.054137 12 3 -0.060193 12 4 0.025183 12 5  
0.090593 12 6 -0.002120 12 7 -0.001028 12 8 -0.019265  
12 9 -0.055812 12 10 -0.087156 12 11 0.021180 12 13 -0.268563 12 14  
-0.134466 12 15 -0.126433 12 16 0.046472 12 17 0.145386  
12 18 0.044451 12 19 0.014101 12 20 -0.018882 12 21 -0.104843 12 22  
-0.116507 12 23 0.010565 12 24 -0.031800 12 25 -0.026766  
13 1 0.958981 13 2 0.770538 13 3 0.805542 13 4 -0.395589 13 5  
-0.285004 13 6 -0.486516 13 7 0.047556 13 8 0.014736  
13 9 0.229576 13 10 0.170090 13 11 0.343951 13 12 -0.268563 13 14  
0.761241 13 15 0.806222 13 16 -0.399486 13 17 -0.294700  
13 18 -0.507284 13 19 0.051687 13 20 0.014003 13 21 0.235791 13 22  
0.180318 13 23 0.349622 13 24 0.322234 13 25 -0.285348  
14 1 0.792937 14 2 0.976666 14 3 0.906989 14 4 -0.633535 14 5  
-0.144267 14 6 -0.391313 14 7 -0.005319 14 8 -0.157024  
14 9 0.202173 14 10 0.056302 14 11 0.269296 14 12 -0.134466 14 13  
0.761241 14 15 0.877916 14 16 -0.640978 14 17 -0.152582  
14 18 -0.382781 14 19 -0.039703 14 20 -0.158785 14 21 0.214948 14 22  
0.058682 14 23 0.267055 14 24 0.485410 14 25 -0.220271  
15 1 0.835011 15 2 0.912951 15 3 0.985806 15 4 -0.505682 15 5  
-0.118091 15 6 -0.441162 15 7 0.107988 15 8 0.186949  
15 9 0.162305 15 10 0.005283 15 11 0.308885 15 12 -0.126433 15 13  
0.806222 15 14 0.877916 15 16 -0.510147 15 17 -0.120424  
15 18 -0.435089 15 19 0.137761 15 20 0.186270 15 21 0.163631 15 22  
0.008285 15 23 0.307165 15 24 0.519649 15 25 -0.249794  
16 1 -0.421774 16 2 -0.651885 16 3 -0.515351 16 4 0.998772 16 5  
-0.231633 16 6 0.326970 16 7 0.004663 16 8 0.468363  
16 9 -0.145562 16 10 0.166046 16 11 -0.238980 16 12 0.046472 16 13  
-0.399486 16 14 -0.640978 16 15 -0.510147 16 17 -0.225311  
16 18 0.319293 16 19 0.007229 16 20 0.470876 16 21 -0.149795 16 22  
0.164291 16 23 -0.237179 16 24 -0.862138 16 25 0.193525  
17 1 -0.251762 17 2 -0.126314 17 3 -0.114717 17 4 -0.231983 17 5  
0.994480 17 6 -0.358804 17 7 -0.004543 17 8 -0.063880  
17 9 -0.471565 17 10 -0.815213 17 11 0.341012 17 12 0.145386 17 13  
-0.294700 17 14 -0.152582 17 15 -0.120424 17 16 -0.225311  
17 18 -0.335162 17 19 0.009879 17 20 -0.062962 17 21 -0.487132 17 22  
-0.819602 17 23 0.334902 17 24 0.266380 17 25 -0.283328  
18 1 -0.482573 18 2 -0.403777 18 3 -0.440278 18 4 0.320239 18 5  
-0.335645 18 6 0.994393 18 7 -0.008472 18 8 -0.017471  
18 9 0.073366 18 10 0.334160 18 11 -0.956922 18 12 0.044451 18 13  
-0.507284 18 14 -0.382781 18 15 -0.435089 18 16 0.319293  
18 17 -0.335162 18 19 -0.017037 18 20 -0.017889 18 21 0.080073 18 22  
0.329973 18 23 -0.958812 18 24 -0.295333 18 25 0.898515  
19 1 0.058002 19 2 -0.018629 19 3 0.128064 19 4 0.007535 19 5  
0.006482 19 6 -0.018388 19 7 0.981298 19 8 0.172887  
19 9 -0.298534 19 10 0.109715 19 11 -0.011899 19 12 0.014101 19 13  
0.051687 19 14 -0.039703 19 15 0.137761 19 16 0.007229  
19 17 0.009879 19 18 -0.017037 19 20 0.168895 19 21 -0.302483 19 22  
0.106949 19 23 -0.012282 19 24 0.215718 19 25 0.015778  
20 1 0.016023 20 2 -0.159645 20 3 0.178220 20 4 0.476344 20 5  
-0.061158 20 6 -0.020536 20 7 0.147957 20 8 0.998401  
20 9 -0.012694 20 10 -0.061122 20 11 0.024713 20 12 -0.018882 20 13  
0.014003 20 14 -0.158785 20 15 0.186270 20 16 0.470876  
20 17 -0.062962 20 18 -0.017889 20 19 0.168895 20 21 -0.010985 20 22  
-0.056423 20 23 0.023441 20 24 -0.066545 20 25 -0.019048  
21 1 0.207867 21 2 0.199205 21 3 0.160179 21 4 -0.146402 21 5  
-0.478272 21 6 0.093133 21 7 -0.293735 21 8 -0.013134  
21 9 0.989684 21 10 0.023461 21 11 -0.040009 21 12 -0.104843 21 13  
0.235791 21 14 0.214948 21 15 0.163631 21 16 -0.149795  
21 17 -0.487132 21 18 0.080073 21 19 -0.302483 21 20 -0.010985 21 22  
0.036147 21 23 -0.037019 21 24 -0.015346 21 25 0.023303  
22 1 0.136085 22 2 0.036166 22 3 0.002329 22 4 0.169558 22 5

-0.811141 22 6 0.352556 22 7 0.119320 22 8 -0.053839  
22 9 0.020005 22 10 0.996889 22 11 -0.384906 22 12 -0.116507 22 13  
0.180318 22 14 0.058682 22 15 0.008285 22 16 0.164291  
22 17 -0.819602 22 18 0.329973 22 19 0.106949 22 20 -0.056423 22 21  
0.036147 22 23 -0.378878 22 24 -0.161630 22 25 0.331177  
23 1 0.337651 23 2 0.284172 23 3 0.313405 23 4 -0.238203 23 5  
0.332446 23 6 -0.958410 23 7 -0.017707 23 8 0.022691  
23 9 -0.031101 23 10 -0.379417 23 11 0.999433 23 12 0.010565 23 13  
0.349622 23 14 0.267055 23 15 0.307165 23 16 -0.237179  
23 17 0.334902 23 18 -0.958812 23 19 -0.012282 23 20 0.023441 23 21  
-0.037019 23 22 -0.378878 23 24 0.215015 23 25 -0.981998  
24 1 0.345168 24 2 0.500402 24 3 0.518927 24 4 -0.858772 24 5  
0.272667 24 6 -0.304481 24 7 0.204493 24 8 -0.063270  
24 9 -0.020365 24 10 -0.163134 24 11 0.217306 24 12 -0.031800 24 13  
0.322234 24 14 0.485410 24 15 0.519649 24 16 -0.862138  
24 17 0.266380 24 18 -0.295333 24 19 0.215718 24 20 -0.066545 24 21  
-0.015346 24 22 -0.161630 24 23 0.215015 24 25 -0.173086  
25 1 -0.280640 25 2 -0.232613 25 3 -0.256027 25 4 0.193909 25 5  
-0.281355 25 6 0.901559 25 7 0.018097 25 8 -0.018388  
25 9 0.021367 25 10 0.329433 25 11 -0.982342 25 12 -0.026766 25 13  
-0.285348 25 14 -0.220271 25 15 -0.249794 25 16 0.193525  
25 17 -0.283328 25 18 0.898515 25 19 0.015778 25 20 -0.019048 25 21  
0.023303 25 22 0.331177 25 23 -0.981998 25 24 -0.173086  
nscl -predict delta A,B,C from OPCL-JMS 200, 287-89 (200Thu Jul 31  
12:00:15 2003
