# Supplementary material for: High resolution FTIR spectroscopy of the ν1band of NSCl
Source: Royal Society of Chemistry journal article supplement (doi:10.1039/b416215c), 2005-01-01
Supplement: b416215c-e2.pdf [file b416215c-e2.pdf]

nscl -predict delta A,B,C from OPl-JMS 200, 287-89 (200Thu Sep 23  
 17:59:22 2004  
 LINES REQUESTED= 3847 NUMBER OF PARAMETERS= 27 NUMBER OF ITERATIONS= 3  
 MARQUARDT PARAMETER =0.0000E+000 max (OBS-CALC)/ERROR =1.0000E+006

|       |    | PARAMETERS - A.PRIORI ERROR |                       |               |    |
|-------|----|-----------------------------|-----------------------|---------------|----|
| 1     | 1  | 10000                       | 4.1624719489558E+004  | 1.000000E+018 | A  |
| 2     | 2  | 20000                       | 3.9974064439906E+003  | 1.000000E+018 | B  |
| 3     | 3  | 30000                       | 3.6410582723152E+003  | 1.000000E+018 | C  |
| 4     | 4  | 200                         | -2.5018716995116E-003 | 1.000000E+018 |    |
| -DJ   |    |                             |                       |               |    |
| 5     | 5  | 1100                        | 3.8844282181946E-002  | 1.000000E+018 |    |
| -DJK  |    |                             |                       |               |    |
| 6     | 6  | 2000                        | -1.6547397961634E+000 | 1.000000E+018 |    |
| -DK   |    |                             |                       |               |    |
| 7     | 7  | 40100                       | -3.3728211238476E-004 | 1.000000E+018 |    |
| -delj |    |                             |                       |               |    |
| 8     | 8  | 41000                       | -1.8390292886417E-002 | 1.000000E+018 |    |
| -delk |    |                             |                       |               |    |
| 9     | 9  | 300                         | 6.9779965503331E-010  | 1.000000E-018 | HJ |
| 10    | 10 | 1200                        | 4.7179543392027E-008  | 1.000000E+018 |    |
| HJK   |    |                             |                       |               |    |
| 11    | 11 | 2100                        | -1.0866733024007E-005 | 1.000000E+018 |    |
| HKJ   |    |                             |                       |               |    |
| 12    | 12 | 3000                        | 2.9963938320014E-004  | 1.000000E+018 | HK |
| 13    | 13 | 4000                        | -5.6115838887550E-008 | 1.000000E-018 |    |
| -LK   |    |                             |                       |               |    |
| 14    | 14 | 11                          | 3.9739665707984E+007  | 1.000000E+018 | E  |
| 15    | 15 | 10011                       | 4.1304876380965E+004  | 1.000000E+018 | A  |
| 16    | 16 | 20011                       | 3.9965221777781E+003  | 1.000000E+018 | B  |
| 17    | 17 | 30011                       | 3.6380061509315E+003  | 1.000000E+018 | C  |
| 18    | 18 | 211                         | -2.5115394731190E-003 | 1.000000E+018 |    |
| -DJ   |    |                             |                       |               |    |
| 19    | 19 | 1111                        | 3.9118273578787E-002  | 1.000000E+018 |    |
| -DJK  |    |                             |                       |               |    |
| 20    | 20 | 2011                        | -1.6380214436456E+000 | 1.000000E+018 |    |
| -DK   |    |                             |                       |               |    |
| 21    | 21 | 40111                       | -3.4139623766636E-004 | 1.000000E+018 |    |
| -delj |    |                             |                       |               |    |
| 22    | 22 | 41011                       | -1.8321542460778E-002 | 1.000000E+018 |    |
| -delk |    |                             |                       |               |    |
| 23    | 23 | 311                         | 6.9779965503331E-010  | 1.000000E-037 | HJ |
| 24    | 24 | 1211                        | 4.6339723869282E-008  | 1.000000E+018 |    |
| HJK   |    |                             |                       |               |    |
| 25    | 25 | 2111                        | -1.0847286236543E-005 | 1.000000E+018 |    |
| HKJ   |    |                             |                       |               |    |
| 26    | 26 | 3011                        | 2.9675390372506E-004  | 1.000000E+018 | HK |
| 27    | 27 | 4011                        | -5.6115838887550E-008 | 1.000000E-037 |    |

27 parameters read, 27 independent parameters

ENERGY SORT OF WANG SUB-BLOCKS

PROLATE ROTOR

V KMIN KMAX ESYMWT SPINS

|   |   |    |    |
|---|---|----|----|
| 0 | 0 | 95 | -1 |
| 1 | 0 | 95 | -1 |
| 2 | 0 | 95 | -1 |

BLOCK - WT - SYM - V - TSP - N - other quanta (rel. to F=0 )

|   |   |   |   |   |
|---|---|---|---|---|
| 1 | 1 | x | 0 | 0 |
| 2 | 1 | c | 0 | 0 |
| 3 | 1 | b | 0 | 0 |
| 4 | 1 | a | 0 | 0 |
| 5 | 1 | x | 1 | 0 |
| 6 | 1 | c | 1 | 0 |
| 7 | 1 | b | 1 | 0 |
| 8 | 1 | a | 1 | 0 |
| 9 | 1 | x | 2 | 0 |

|    |   |   |   |   |
|----|---|---|---|---|
| 10 | 1 | c | 2 | 0 |
| 11 | 1 | b | 2 | 0 |
| 12 | 1 | a | 2 | 0 |

Maximum Dimension for Hamiltonian = 48

| DIFF.      | EXP.ERR. | EST.ERR.   | AVG.      | CALC.FREQ. | EXP.FREQ. - CALC.FREQ. - | DIFF. | WT. |   |              |              |
|------------|----------|------------|-----------|------------|--------------------------|-------|-----|---|--------------|--------------|
| 1:         | 2        | 1          | 1         | 0          | 2                        | 0     | 2   | 0 | 38340.96000  | 38340.98281  |
| -0.02281   |          | 0.10000    | 0.00000   |            |                          |       |     |   |              |              |
| 2:         | 3        | 1          | 2         | 0          | 3                        | 0     | 3   | 0 | 38883.77000  | 38884.08189  |
| -0.31189   |          | 0.10000    | 0.00000   |            |                          |       |     |   |              |              |
| 3:         | 4        | 1          | 3         | 0          | 4                        | 0     | 4   | 0 | 39617.16000  | 39616.95488  |
| 0.20512    |          | 0.10000    | 0.00000   |            |                          |       |     |   |              |              |
| 4:         | 5        | 1          | 4         | 0          | 5                        | 0     | 5   | 0 | 40546.83000  | 40547.03937  |
| -0.20937   |          | 0.10000    | 0.00000   |            |                          |       |     |   |              |              |
| 5:         | 6        | 1          | 5         | 0          | 6                        | 0     | 6   | 0 | 41683.50000  | 41683.54600  |
| -0.04600   |          | 0.10000    | 0.00000   |            |                          |       |     |   |              |              |
| 6:         | 7        | 1          | 6         | 0          | 7                        | 0     | 7   | 0 | 43037.70000  | 43037.37313  |
| 0.32687    |          | 0.10000    | 0.00000   |            |                          |       |     |   |              |              |
| 7:         | 8        | 1          | 7         | 0          | 8                        | 0     | 8   | 0 | 44620.90000  | 44620.97784  |
| -0.07784   |          | 0.10000    | 0.00000   |            |                          |       |     |   |              |              |
| 8:         | 1        | 1          | 1         | 0          | 0                        | 0     | 0   | 0 | 45264.20000  | 45264.22911  |
| -0.02911   |          | 0.10000    | 0.00000   |            |                          |       |     |   |              |              |
| 9:         | 2        | 1          | 2         | 0          | 1                        | 0     | 1   | 0 | 52546.40000  | 52546.51529  |
| -0.11529   |          | 0.10000    | 0.00000   |            |                          |       |     |   |              |              |
| 10:        | 3        | 1          | 3         | 0          | 2                        | 0     | 2   | 0 | 59651.80000  | 59651.59853  |
| 0.20147    |          | 0.10000    | 0.00000   |            |                          |       |     |   |              |              |
| 11:        | 1        | 1          | 1         | 0          | 2                        | 0     | 2   | 0 | 22349.70000  | 22351.44238  |
| -1.74238   |          | 99.90000   | 0.00000   |            |                          |       |     |   |              |              |
| 12:        | 15       | 7          | 9         | 1          | 14                       | 6     | 8   | 0 | 1345.1981100 | 1345.1981481 |
| -0.0000381 |          | -0.0004000 | 0.0000000 |            |                          |       |     |   |              |              |
| 13:        | 16       | 7          | 10        | 1          | 15                       | 6     | 9   | 0 | 1345.4511800 | 1345.4511143 |
| 0.0000657  |          | -0.0004000 | 0.0000000 |            |                          |       |     |   |              |              |
| 14:        | 17       | 7          | 11        | 1          | 16                       | 6     | 10  | 0 | 1345.7038700 | 1345.7039053 |
| -0.0000353 |          | -0.0004000 | 0.0000000 |            |                          |       |     |   |              |              |
| 15:        | 19       | 7          | 13        | 1          | 18                       | 6     | 12  | 0 | 1346.2090700 | 1346.2089211 |
| 0.0001489  |          | -0.0004000 | 0.0000000 |            |                          |       |     |   |              |              |
| 16:        | 21       | 7          | 15        | 1          | 20                       | 6     | 14  | 0 | 1346.7134400 | 1346.7131071 |
| 0.0003329  |          | -0.0004000 | 0.0000000 |            |                          |       |     |   |              |              |
| 17:        | 22       | 7          | 16        | 1          | 21                       | 6     | 15  | 0 | 1346.9646500 | 1346.9648586 |
| -0.0002086 |          | -0.0004000 | 0.0000000 |            |                          |       |     |   |              |              |
| 18:        | 23       | 7          | 17        | 1          | 22                       | 6     | 16  | 0 | 1347.2161500 | 1347.2163650 |
| -0.0002150 |          | -0.0004000 | 0.0000000 |            |                          |       |     |   |              |              |
| 19:        | 25       | 7          | 19        | 1          | 24                       | 6     | 18  | 0 | 1347.7188600 | 1347.7185865 |
| 0.0002735  |          | -0.0004000 | 0.0000000 |            |                          |       |     |   |              |              |
| 20:        | 26       | 7          | 20        | 1          | 25                       | 6     | 19  | 0 | 1347.9695300 | 1347.9692720 |
| 0.0002580  |          | -0.0004000 | 0.0000000 |            |                          |       |     |   |              |              |
| 21:        | 29       | 7          | 23        | 1          | 28                       | 6     | 22  | 0 | 1348.7198600 | 1348.7194358 |
| 0.0004242  |          | -0.0004000 | 0.0000000 |            |                          |       |     |   |              |              |
| 22:        | 30       | 7          | 24        | 1          | 29                       | 6     | 23  | 0 | 1348.9695800 | 1348.9688023 |
| 0.0007777  |          | -0.0004000 | 0.0000000 |            |                          |       |     |   |              |              |
| 23:        | 31       | 7          | 25        | 1          | 30                       | 6     | 24  | 0 | 1349.2182500 | 1349.2177942 |
| 0.0004558  |          | -0.0004000 | 0.0000000 |            |                          |       |     |   |              |              |
| 24:        | 32       | 7          | 26        | 1          | 31                       | 6     | 25  | 0 | 1349.4660100 | 1349.4663923 |
| -0.0003823 |          | -0.0004000 | 0.0000000 |            |                          |       |     |   |              |              |
| 25:        | 33       | 7          | 27        | 1          | 32                       | 6     | 26  | 0 | 1349.7150700 | 1349.7145763 |
| 0.0004937  |          | -0.0004000 | 0.0000000 |            |                          |       |     |   |              |              |
| 26:        | 35       | 7          | 29        | 1          | 34                       | 6     | 28  | 0 | 1350.2093900 | 1350.2096167 |
| -0.0002267 |          | -0.0004000 | 0.0000000 |            |                          |       |     |   |              |              |
| 27:        | 36       | 7          | 30        | 1          | 35                       | 6     | 29  | 0 | 1350.4556700 | 1350.4564281 |
| -0.0007581 |          | -0.0004000 | 0.0000000 |            |                          |       |     |   |              |              |
| 28:        | 37       | 7          | 31        | 1          | 36                       | 6     | 30  | 0 | 1350.7026200 | 1350.7027353 |
| -0.0001153 |          | -0.0004000 | 0.0000000 |            |                          |       |     |   |              |              |
| 29:        | 38       | 7          | 32        | 1          | 37                       | 6     | 31  | 0 | 1350.9480200 | 1350.9485128 |
| -0.0004928 |          | -0.0004000 | 0.0000000 |            |                          |       |     |   |              |              |
| 30:        | 39       | 7          | 33        | 1          | 38                       | 6     | 32  | 0 | 1351.1939300 | 1351.1937342 |

|              |            |           |              |           |
|--------------|------------|-----------|--------------|-----------|
| 0.0001958    | -0.0004000 | 0.0000000 |              |           |
| 31: 15       | 7          | 8         | 1            | 14 6 9 0  |
| 1345.1981100 |            |           | 1345.1981481 |           |
| -0.0000381   | -0.0004000 | 0.0000000 |              |           |
| 32: 16       | 7          | 9         | 1            | 15 6 10 0 |
| 1345.4511800 |            |           | 1345.4511143 |           |
| 0.0000657    | -0.0004000 | 0.0000000 |              |           |
| 33: 17       | 7          | 10        | 1            | 16 6 11 0 |
| 1345.7038700 |            |           | 1345.7039054 |           |
| -0.0000354   | -0.0004000 | 0.0000000 |              |           |
| 34: 19       | 7          | 12        | 1            | 18 6 13 0 |
| 1346.2090700 |            |           | 1346.2089212 |           |
| 0.0001488    | -0.0004000 | 0.0000000 |              |           |
| 35: 21       | 7          | 14        | 1            | 20 6 15 0 |
| 1346.7134400 |            |           | 1346.7131072 |           |
| 0.0003328    | -0.0004000 | 0.0000000 |              |           |
| 36: 22       | 7          | 15        | 1            | 21 6 16 0 |
| 1346.9646500 |            |           | 1346.9648588 |           |
| -0.0002088   | -0.0004000 | 0.0000000 |              |           |
| 37: 23       | 7          | 16        | 1            | 22 6 17 0 |
| 1347.2161500 |            |           | 1347.2163654 |           |
| -0.0002154   | -0.0004000 | 0.0000000 |              |           |
| 38: 25       | 7          | 18        | 1            | 24 6 19 0 |
| 1347.7188600 |            |           | 1347.7185877 |           |
| 0.0002723    | -0.0004000 | 0.0000000 |              |           |
| 39: 26       | 7          | 19        | 1            | 25 6 20 0 |
| 1347.9695300 |            |           | 1347.9692740 |           |
| 0.0002560    | -0.0004000 | 0.0000000 |              |           |
| 40: 29       | 7          | 22        | 1            | 28 6 23 0 |
| 1348.7198600 |            |           | 1348.7194434 |           |
| 0.0004166    | -0.0004000 | 0.0000000 |              |           |
| 41: 30       | 7          | 23        | 1            | 29 6 24 0 |
| 1348.9695800 |            |           | 1348.9688138 |           |
| 0.0007662    | -0.0004000 | 0.0000000 |              |           |
| 42: 31       | 7          | 24        | 1            | 30 6 25 0 |
| 1349.2182500 |            |           | 1349.2178115 |           |
| 0.0004385    | -0.0004000 | 0.0000000 |              |           |
| 43: 32       | 7          | 25        | 1            | 31 6 26 0 |
| 1349.4660100 |            |           | 1349.4664179 |           |
| -0.0004079   | -0.0004000 | 0.0000000 |              |           |
| 44: 33       | 7          | 26        | 1            | 32 6 27 0 |
| 1349.7150700 |            |           | 1349.7146136 |           |
| 0.0004564    | -0.0004000 | 0.0000000 |              |           |
| 45: 35       | 7          | 28        | 1            | 34 6 29 0 |
| 1350.2093900 |            |           | 1350.2096934 |           |
| -0.0003034   | -0.0004000 | 0.0000000 |              |           |
| 46: 36       | 7          | 29        | 1            | 35 6 30 0 |
| 1350.4556700 |            |           | 1350.4565363 |           |
| -0.0008663   | -0.0004000 | 0.0000000 |              |           |
| 47: 37       | 7          | 30        | 1            | 36 6 31 0 |
| 1350.7026200 |            |           | 1350.7028864 |           |
| -0.0002664   | -0.0004000 | 0.0000000 |              |           |
| 48: 38       | 7          | 31        | 1            | 37 6 32 0 |
| 1350.9480200 |            |           | 1350.9487220 |           |
| -0.0007020   | -0.0004000 | 0.0000000 |              |           |
| 49: 39       | 7          | 32        | 1            | 38 6 33 0 |
| 1351.1939300 |            |           | 1351.1940210 |           |
| -0.0000910   | -0.0004000 | 0.0000000 |              |           |
| 50: 12       | 8          | 4         | 1            | 11 7 5 0  |
| 1346.7715200 |            |           | 1346.7712438 |           |
| 0.0002762    | -0.0004000 | 0.0000000 |              |           |
| 51: 13       | 8          | 5         | 1            | 12 7 6 0  |
| 1347.0255200 |            |           | 1347.0248101 |           |
| 0.0007099    | -0.0004000 | 0.0000000 |              |           |
| 52: 14       | 8          | 6         | 1            | 13 7 7 0  |
| 1347.2785100 |            |           | 1347.2782450 |           |
| 0.0002650    | -0.0004000 | 0.0000000 |              |           |
| 53: 15       | 8          | 7         | 1            | 14 7 8 0  |
| 1347.5318200 |            |           | 1347.5315427 |           |
| 0.0002773    | -0.0004000 | 0.0000000 |              |           |
| 54: 16       | 8          | 8         | 1            | 15 7 9 0  |
| 1347.7854100 |            |           | 1347.7846970 |           |
| 0.0007130    | -0.0004000 | 0.0000000 |              |           |
| 55: 17       | 8          | 9         | 1            | 16 7 10 0 |
| 1348.0381900 |            |           | 1348.0377014 |           |
| 0.0004886    | -0.0004000 | 0.0000000 |              |           |
| 56: 18       | 8          | 10        | 1            | 17 7 11 0 |
| 1348.2908600 |            |           | 1348.2905489 |           |
| 0.0003111    | -0.0004000 | 0.0000000 |              |           |
| 57: 19       | 8          | 11        | 1            | 18 7 12 0 |
| 1348.5426300 |            |           | 1348.5432321 |           |
| -0.0006021   | -0.0004000 | 0.0000000 |              |           |
| 58: 20       | 8          | 12        | 1            | 19 7 13 0 |
| 1348.7955500 |            |           | 1348.7957435 |           |
| -0.0001935   | -0.0004000 | 0.0000000 |              |           |
| 59: 23       | 8          | 15        | 1            | 22 7 16 0 |
| 1349.5524500 |            |           | 1349.5521629 |           |
| 0.0002871    | -0.0004000 | 0.0000000 |              |           |
| 60: 24       | 8          | 16        | 1            | 23 7 17 0 |
| 1349.8034400 |            |           | 1349.8039015 |           |
| -0.0004615   | -0.0004000 | 0.0000000 |              |           |
| 61: 25       | 8          | 17        | 1            | 24 7 18 0 |
| 1350.0556400 |            |           | 1350.0554236 |           |
| 0.0002164    | -0.0004000 | 0.0000000 |              |           |
| 62: 26       | 8          | 18        | 1            | 25 7 19 0 |
| 1350.3063600 |            |           | 1350.3067193 |           |
| -0.0003593   | -0.0004000 | 0.0000000 |              |           |

|                                 |              |              |
|---------------------------------|--------------|--------------|
| 63: 28 8 20 1 27 7 21 0         | 1350.8088900 | 1350.8085890 |
| 0.0003010 -0.0004000 0.0000000  |              |              |
| 64: 29 8 21 1 28 7 22 0         | 1351.0593600 | 1351.0591409 |
| 0.0002191 -0.0004000 0.0000000  |              |              |
| 65: 31 8 23 1 30 7 24 0         | 1351.5594700 | 1351.5594206 |
| 0.0000494 -0.0004000 0.0000000  |              |              |
| 66: 36 8 28 1 35 7 29 0         | 1352.8048000 | 1352.8047234 |
| 0.0000766 -0.0004000 0.0000000  |              |              |
| 67: 39 8 31 1 38 7 32 0         | 1353.5483000 | 1353.5476550 |
| 0.0006450 -0.0004000 0.0000000  |              |              |
| 68: 12 8 5 1 11 7 4 0           | 1346.7715200 | 1346.7712438 |
| 0.0002762 -0.0004000 0.0000000  |              |              |
| 69: 13 8 6 1 12 7 5 0           | 1347.0255200 | 1347.0248101 |
| 0.0007099 -0.0004000 0.0000000  |              |              |
| 70: 14 8 7 1 13 7 6 0           | 1347.2785100 | 1347.2782450 |
| 0.0002650 -0.0004000 0.0000000  |              |              |
| 71: 15 8 8 1 14 7 7 0           | 1347.5318200 | 1347.5315427 |
| 0.0002773 -0.0004000 0.0000000  |              |              |
| 72: 16 8 9 1 15 7 8 0           | 1347.7854100 | 1347.7846970 |
| 0.0007130 -0.0004000 0.0000000  |              |              |
| 73: 17 8 10 1 16 7 9 0          | 1348.0381900 | 1348.0377014 |
| 0.0004886 -0.0004000 0.0000000  |              |              |
| 74: 18 8 11 1 17 7 10 0         | 1348.2908600 | 1348.2905489 |
| 0.0003111 -0.0004000 0.0000000  |              |              |
| 75: 19 8 12 1 18 7 11 0         | 1348.5426300 | 1348.5432321 |
| -0.0006021 -0.0004000 0.0000000 |              |              |
| 76: 20 8 13 1 19 7 12 0         | 1348.7955500 | 1348.7957435 |
| -0.0001935 -0.0004000 0.0000000 |              |              |
| 77: 23 8 16 1 22 7 15 0         | 1349.5524500 | 1349.5521629 |
| 0.0002871 -0.0004000 0.0000000  |              |              |
| 78: 24 8 17 1 23 7 16 0         | 1349.8034400 | 1349.8039014 |
| -0.0004614 -0.0004000 0.0000000 |              |              |
| 79: 25 8 18 1 24 7 17 0         | 1350.0556400 | 1350.0554236 |
| 0.0002164 -0.0004000 0.0000000  |              |              |
| 80: 26 8 19 1 25 7 18 0         | 1350.3063600 | 1350.3067193 |
| -0.0003593 -0.0004000 0.0000000 |              |              |
| 81: 28 8 21 1 27 7 20 0         | 1350.8088900 | 1350.8085889 |
| 0.0003011 -0.0004000 0.0000000  |              |              |
| 82: 29 8 22 1 28 7 21 0         | 1351.0593600 | 1351.0591408 |
| 0.0002192 -0.0004000 0.0000000  |              |              |
| 83: 31 8 24 1 30 7 23 0         | 1351.5594700 | 1351.5594204 |
| 0.0000496 -0.0004000 0.0000000  |              |              |
| 84: 36 8 29 1 35 7 28 0         | 1352.8048000 | 1352.8047212 |
| 0.0000788 -0.0004000 0.0000000  |              |              |
| 85: 39 8 32 1 38 7 31 0         | 1353.5483000 | 1353.5476483 |
| 0.0006517 -0.0004000 0.0000000  |              |              |
| 86: 9 9 0 1 8 8 1 0             | 1348.3119200 | 1348.3122613 |
| -0.0003413 -0.0004000 0.0000000 |              |              |
| 87: 10 9 1 1 9 8 2 0            | 1348.5661300 | 1348.5662803 |
| -0.0001503 -0.0004000 0.0000000 |              |              |
| 88: 11 9 2 1 10 8 3 0           | 1348.8198900 | 1348.8201906 |
| -0.0003006 -0.0004000 0.0000000 |              |              |
| 89: 14 9 5 1 13 8 6 0           | 1349.5812500 | 1349.5812319 |
| 0.0000181 -0.0004000 0.0000000  |              |              |
| 90: 16 9 7 1 15 8 8 0           | 1350.0881200 | 1350.0879759 |
| 0.0001441 -0.0004000 0.0000000  |              |              |
| 91: 20 9 11 1 19 8 12 0         | 1351.1007300 | 1351.0998086 |
| 0.0009214 -0.0004000 0.0000000  |              |              |
| 92: 22 9 13 1 21 8 14 0         | 1351.6048800 | 1351.6048077 |
| 0.0000723 -0.0004000 0.0000000  |              |              |
| 93: 23 9 14 1 22 8 15 0         | 1351.8567500 | 1351.8570563 |
| -0.0003063 -0.0004000 0.0000000 |              |              |
| 94: 24 9 15 1 23 8 16 0         | 1352.1086400 | 1352.1091286 |
| -0.0004886 -0.0004000 0.0000000 |              |              |
| 95: 25 9 16 1 24 8 17 0         | 1352.3606800 | 1352.3610176 |

|            |                  |           |              |              |
|------------|------------------|-----------|--------------|--------------|
| -0.0003376 | -0.0004000       | 0.0000000 |              |              |
| 96: 27     | 9 18 1 26 8 19 0 |           | 1352.8643500 | 1352.8642163 |
| 0.0001337  | -0.0004000       | 0.0000000 |              |              |
| 97: 29     | 9 20 1 28 8 21 0 |           | 1353.3669000 | 1353.3665906 |
| 0.0003094  | -0.0004000       | 0.0000000 |              |              |
| 98: 30     | 9 21 1 29 8 22 0 |           | 1353.6182800 | 1353.6174482 |
| 0.0008318  | -0.0004000       | 0.0000000 |              |              |
| 99: 32     | 9 23 1 31 8 24 0 |           | 1354.1183700 | 1354.1184615 |
| -0.0000915 | -0.0004000       | 0.0000000 |              |              |
| 100: 34    | 9 25 1 33 8 26 0 |           | 1354.6188000 | 1354.6184782 |
| 0.0003218  | -0.0004000       | 0.0000000 |              |              |
| 101: 35    | 9 26 1 34 8 27 0 |           | 1354.8678400 | 1354.8680892 |
| -0.0002492 | -0.0004000       | 0.0000000 |              |              |
| 102: 37    | 9 28 1 36 8 29 0 |           | 1355.3668100 | 1355.3664668 |
| 0.0003432  | -0.0004000       | 0.0000000 |              |              |
| 103: 38    | 9 29 1 37 8 30 0 |           | 1355.6145100 | 1355.6152129 |
| -0.0007029 | -0.0004000       | 0.0000000 |              |              |
| 104: 40    | 9 31 1 39 8 32 0 |           | 1356.1115200 | 1356.1117657 |
| -0.0002457 | -0.0004000       | 0.0000000 |              |              |
| 105: 41    | 9 32 1 40 8 33 0 |           | 1356.3598100 | 1356.3595502 |
| 0.0002598  | -0.0004000       | 0.0000000 |              |              |
| 106: 43    | 9 34 1 42 8 35 0 |           | 1356.8540800 | 1356.8540780 |
| 0.0000020  | -0.0004000       | 0.0000000 |              |              |
| 107: 9     | 9 1 1 8 8 0 0    |           | 1348.3119200 | 1348.3122613 |
| -0.0003413 | -0.0004000       | 0.0000000 |              |              |
| 108: 10    | 9 2 1 9 8 1 0    |           | 1348.5661300 | 1348.5662803 |
| -0.0001503 | -0.0004000       | 0.0000000 |              |              |
| 109: 11    | 9 3 1 10 8 2 0   |           | 1348.8198900 | 1348.8201906 |
| -0.0003006 | -0.0004000       | 0.0000000 |              |              |
| 110: 14    | 9 6 1 13 8 5 0   |           | 1349.5812500 | 1349.5812319 |
| 0.0000181  | -0.0004000       | 0.0000000 |              |              |
| 111: 16    | 9 8 1 15 8 7 0   |           | 1350.0881200 | 1350.0879759 |
| 0.0001441  | -0.0004000       | 0.0000000 |              |              |
| 112: 20    | 9 12 1 19 8 11 0 |           | 1351.1007300 | 1351.0998086 |
| 0.0009214  | -0.0004000       | 0.0000000 |              |              |
| 113: 22    | 9 14 1 21 8 13 0 |           | 1351.6048800 | 1351.6048077 |
| 0.0000723  | -0.0004000       | 0.0000000 |              |              |
| 114: 23    | 9 15 1 22 8 14 0 |           | 1351.8567500 | 1351.8570563 |
| -0.0003063 | -0.0004000       | 0.0000000 |              |              |
| 115: 24    | 9 16 1 23 8 15 0 |           | 1352.1086400 | 1352.1091286 |
| -0.0004886 | -0.0004000       | 0.0000000 |              |              |
| 116: 25    | 9 17 1 24 8 16 0 |           | 1352.3606800 | 1352.3610176 |
| -0.0003376 | -0.0004000       | 0.0000000 |              |              |
| 117: 27    | 9 19 1 26 8 18 0 |           | 1352.8643500 | 1352.8642162 |
| 0.0001338  | -0.0004000       | 0.0000000 |              |              |
| 118: 29    | 9 21 1 28 8 20 0 |           | 1353.3669000 | 1353.3665906 |
| 0.0003094  | -0.0004000       | 0.0000000 |              |              |
| 119: 30    | 9 22 1 29 8 21 0 |           | 1353.6182800 | 1353.6174482 |
| 0.0008318  | -0.0004000       | 0.0000000 |              |              |
| 120: 32    | 9 24 1 31 8 23 0 |           | 1354.1183700 | 1354.1184615 |
| -0.0000915 | -0.0004000       | 0.0000000 |              |              |
| 121: 34    | 9 26 1 33 8 25 0 |           | 1354.6188000 | 1354.6184782 |
| 0.0003218  | -0.0004000       | 0.0000000 |              |              |
| 122: 35    | 9 27 1 34 8 26 0 |           | 1354.8678400 | 1354.8680892 |
| -0.0002492 | -0.0004000       | 0.0000000 |              |              |
| 123: 37    | 9 29 1 36 8 28 0 |           | 1355.3668100 | 1355.3664668 |
| 0.0003432  | -0.0004000       | 0.0000000 |              |              |
| 124: 38    | 9 30 1 37 8 29 0 |           | 1355.6145100 | 1355.6152128 |
| -0.0007028 | -0.0004000       | 0.0000000 |              |              |
| 125: 40    | 9 32 1 39 8 31 0 |           | 1356.1115200 | 1356.1117655 |
| -0.0002455 | -0.0004000       | 0.0000000 |              |              |
| 126: 41    | 9 33 1 40 8 32 0 |           | 1356.3598100 | 1356.3595500 |
| 0.0002600  | -0.0004000       | 0.0000000 |              |              |
| 127: 43    | 9 35 1 42 8 34 0 |           | 1356.8540800 | 1356.8540774 |
| 0.0000026  | -0.0004000       | 0.0000000 |              |              |

|                                 |              |              |
|---------------------------------|--------------|--------------|
| 128: 11 10 1 1 10 9 2 0         | 1351.0915000 | 1351.0916404 |
| -0.0001404 -0.0004000 0.0000000 |              |              |
| 129: 12 10 2 1 11 9 3 0         | 1351.3454900 | 1351.3455417 |
| -0.0000517 -0.0004000 0.0000000 |              |              |
| 130: 14 10 4 1 13 9 5 0         | 1351.8527100 | 1351.8530147 |
| -0.0003047 -0.0004000 0.0000000 |              |              |
| 131: 20 10 10 1 19 9 11 0       | 1353.3717600 | 1353.3725282 |
| -0.0007682 -0.0004000 0.0000000 |              |              |
| 132: 21 10 11 1 20 9 12 0       | 1353.6254800 | 1353.6253124 |
| 0.0001676 -0.0004000 0.0000000  |              |              |
| 133: 22 10 12 1 21 9 13 0       | 1353.8778400 | 1353.8779505 |
| -0.0001105 -0.0004000 0.0000000 |              |              |
| 134: 24 10 14 1 23 9 15 0       | 1354.3828400 | 1354.3827676 |
| 0.0000724 -0.0004000 0.0000000  |              |              |
| 135: 29 10 19 1 28 9 20 0       | 1355.6420000 | 1355.6418720 |
| 0.0001280 -0.0004000 0.0000000  |              |              |
| 136: 30 10 20 1 29 9 21 0       | 1355.8932700 | 1355.8931414 |
| 0.0001286 -0.0004000 0.0000000  |              |              |
| 137: 31 10 21 1 30 9 22 0       | 1356.1441600 | 1356.1442119 |
| -0.0000519 -0.0004000 0.0000000 |              |              |
| 138: 32 10 22 1 31 9 23 0       | 1356.3956300 | 1356.3950770 |
| 0.0005530 -0.0004000 0.0000000  |              |              |
| 139: 33 10 23 1 32 9 24 0       | 1356.6462900 | 1356.6457295 |
| 0.0005605 -0.0004000 0.0000000  |              |              |
| 140: 37 10 27 1 36 9 28 0       | 1357.6457600 | 1357.6460696 |
| -0.0003096 -0.0004000 0.0000000 |              |              |
| 141: 39 10 29 1 38 9 30 0       | 1358.1450600 | 1358.1447708 |
| 0.0002892 -0.0004000 0.0000000  |              |              |
| 142: 11 10 2 1 10 9 1 0         | 1351.0915000 | 1351.0916404 |
| -0.0001404 -0.0004000 0.0000000 |              |              |
| 143: 12 10 3 1 11 9 2 0         | 1351.3454900 | 1351.3455417 |
| -0.0000517 -0.0004000 0.0000000 |              |              |
| 144: 14 10 5 1 13 9 4 0         | 1351.8527100 | 1351.8530147 |
| -0.0003047 -0.0004000 0.0000000 |              |              |
| 145: 20 10 11 1 19 9 10 0       | 1353.3717600 | 1353.3725282 |
| -0.0007682 -0.0004000 0.0000000 |              |              |
| 146: 21 10 12 1 20 9 11 0       | 1353.6254800 | 1353.6253124 |
| 0.0001676 -0.0004000 0.0000000  |              |              |
| 147: 22 10 13 1 21 9 12 0       | 1353.8778400 | 1353.8779505 |
| -0.0001105 -0.0004000 0.0000000 |              |              |
| 148: 24 10 15 1 23 9 14 0       | 1354.3828400 | 1354.3827676 |
| 0.0000724 -0.0004000 0.0000000  |              |              |
| 149: 29 10 20 1 28 9 19 0       | 1355.6420000 | 1355.6418720 |
| 0.0001280 -0.0004000 0.0000000  |              |              |
| 150: 30 10 21 1 29 9 20 0       | 1355.8932700 | 1355.8931414 |
| 0.0001286 -0.0004000 0.0000000  |              |              |
| 151: 31 10 22 1 30 9 21 0       | 1356.1441600 | 1356.1442119 |
| -0.0000519 -0.0004000 0.0000000 |              |              |
| 152: 32 10 23 1 31 9 22 0       | 1356.3956300 | 1356.3950770 |
| 0.0005530 -0.0004000 0.0000000  |              |              |
| 153: 33 10 24 1 32 9 23 0       | 1356.6462900 | 1356.6457295 |
| 0.0005605 -0.0004000 0.0000000  |              |              |
| 154: 37 10 28 1 36 9 27 0       | 1357.6457600 | 1357.6460696 |
| -0.0003096 -0.0004000 0.0000000 |              |              |
| 155: 39 10 30 1 38 9 29 0       | 1358.1450600 | 1358.1447708 |
| 0.0002892 -0.0004000 0.0000000  |              |              |
| 156: 41 10 32 1 40 9 31 0       | 1358.6424100 | 1358.6424070 |
| 0.0000030 -0.0004000 0.0000000  |              |              |
| 157: 14 11 4 1 13 10 3 0        | 1354.0923100 | 1354.0926709 |
| -0.0003609 -0.0004000 0.0000000 |              |              |
| 158: 15 11 5 1 14 10 4 0        | 1354.3457700 | 1354.3463592 |
| -0.0005892 -0.0004000 0.0000000 |              |              |
| 159: 28 11 18 1 27 10 17 0      | 1357.6326100 | 1357.6327614 |
| -0.0001514 -0.0004000 0.0000000 |              |              |
| 160: 30 11 20 1 29 10 19 0      | 1358.1359700 | 1358.1361191 |

|            |            |           |              |              |
|------------|------------|-----------|--------------|--------------|
| -0.0001491 | -0.0004000 | 0.0000000 |              |              |
| 161:       | 31         | 11        | 21           | 1 30 10 20 0 |
| -0.0001551 | -0.0004000 | 0.0000000 | 1358.3873800 | 1358.3875351 |
| 162:       | 14         | 11        | 3            | 1 13 10 4 0  |
| -0.0003609 | -0.0004000 | 0.0000000 | 1354.0923100 | 1354.0926709 |
| 163:       | 15         | 11        | 4            | 1 14 10 5 0  |
| -0.0005892 | -0.0004000 | 0.0000000 | 1354.3457700 | 1354.3463592 |
| 164:       | 28         | 11        | 17           | 1 27 10 18 0 |
| -0.0001514 | -0.0004000 | 0.0000000 | 1357.6326100 | 1357.6327614 |
| 165:       | 30         | 11        | 19           | 1 29 10 20 0 |
| -0.0001491 | -0.0004000 | 0.0000000 | 1358.1359700 | 1358.1361191 |
| 166:       | 31         | 11        | 20           | 1 30 10 21 0 |
| -0.0001551 | -0.0004000 | 0.0000000 | 1358.3873800 | 1358.3875351 |
| 167:       | 14         | 12        | 2            | 1 13 11 3 0  |
| -0.0005654 | -0.0004000 | 0.0000000 | 1356.2987700 | 1356.2993354 |
| 168:       | 16         | 12        | 4            | 1 15 11 5 0  |
| -0.0006707 | -0.0004000 | 0.0000000 | 1356.8061800 | 1356.8068507 |
| 169:       | 19         | 12        | 7            | 1 18 11 8 0  |
| 0.0004479  | -0.0004000 | 0.0000000 | 1357.5677500 | 1357.5673021 |
| 170:       | 24         | 12        | 12           | 1 23 11 13 0 |
| -0.0007216 | -0.0004000 | 0.0000000 | 1358.8315900 | 1358.8323116 |
| 171:       | 27         | 12        | 15           | 1 26 11 16 0 |
| -0.0003721 | -0.0004000 | 0.0000000 | 1359.5893400 | 1359.5897121 |
| 172:       | 28         | 12        | 16           | 1 27 11 17 0 |
| 0.0001622  | -0.0004000 | 0.0000000 | 1359.8420500 | 1359.8418878 |
| 173:       | 29         | 12        | 17           | 1 28 11 18 0 |
| 0.0005791  | -0.0004000 | 0.0000000 | 1360.0944900 | 1360.0939109 |
| 174:       | 30         | 12        | 18           | 1 29 11 19 0 |
| -0.0008171 | -0.0004000 | 0.0000000 | 1360.3449600 | 1360.3457771 |
| 175:       | 32         | 12        | 20           | 1 31 11 21 0 |
| -0.0004109 | -0.0004000 | 0.0000000 | 1360.8486100 | 1360.8490209 |
| 176:       | 33         | 12        | 21           | 1 32 11 22 0 |
| -0.0002193 | -0.0004000 | 0.0000000 | 1361.1001700 | 1361.1003893 |
| 177:       | 37         | 12        | 25           | 1 36 11 26 0 |
| 0.0005898  | -0.0004000 | 0.0000000 | 1362.1046500 | 1362.1040602 |
| 178:       | 41         | 12        | 29           | 1 40 11 30 0 |
| 0.0003467  | -0.0004000 | 0.0000000 | 1363.1049500 | 1363.1046033 |
| 179:       | 43         | 12        | 31           | 1 42 11 32 0 |
| -0.0004748 | -0.0004000 | 0.0000000 | 1363.6031200 | 1363.6035948 |
| 180:       | 14         | 12        | 3            | 1 13 11 2 0  |
| -0.0005654 | -0.0004000 | 0.0000000 | 1356.2987700 | 1356.2993354 |
| 181:       | 16         | 12        | 5            | 1 15 11 4 0  |
| -0.0006707 | -0.0004000 | 0.0000000 | 1356.8061800 | 1356.8068507 |
| 182:       | 19         | 12        | 8            | 1 18 11 7 0  |
| 0.0004479  | -0.0004000 | 0.0000000 | 1357.5677500 | 1357.5673021 |
| 183:       | 24         | 12        | 13           | 1 23 11 12 0 |
| -0.0007216 | -0.0004000 | 0.0000000 | 1358.8315900 | 1358.8323116 |
| 184:       | 27         | 12        | 16           | 1 26 11 15 0 |
| -0.0003721 | -0.0004000 | 0.0000000 | 1359.5893400 | 1359.5897121 |
| 185:       | 28         | 12        | 17           | 1 27 11 16 0 |
| 0.0001622  | -0.0004000 | 0.0000000 | 1359.8420500 | 1359.8418878 |
| 186:       | 29         | 12        | 18           | 1 28 11 17 0 |
| 0.0005791  | -0.0004000 | 0.0000000 | 1360.0944900 | 1360.0939109 |
| 187:       | 30         | 12        | 19           | 1 29 11 18 0 |
| -0.0008171 | -0.0004000 | 0.0000000 | 1360.3449600 | 1360.3457771 |
| 188:       | 32         | 12        | 21           | 1 31 11 20 0 |
| -0.0004109 | -0.0004000 | 0.0000000 | 1360.8486100 | 1360.8490209 |
| 189:       | 33         | 12        | 22           | 1 32 11 21 0 |
| -0.0002193 | -0.0004000 | 0.0000000 | 1361.1001700 | 1361.1003893 |
| 190:       | 37         | 12        | 26           | 1 36 11 25 0 |
| 0.0005898  | -0.0004000 | 0.0000000 | 1362.1046500 | 1362.1040602 |
| 191:       | 41         | 12        | 30           | 1 40 11 29 0 |
| 0.0003467  | -0.0004000 | 0.0000000 | 1363.1049500 | 1363.1046033 |
| 192:       | 43         | 12        | 32           | 1 42 11 31 0 |
| -0.0004748 | -0.0004000 | 0.0000000 | 1363.6031200 | 1363.6035948 |

|                                 |              |              |
|---------------------------------|--------------|--------------|
| 193: 15 13 2 1 14 12 3 0        | 1358.7258300 | 1358.7261411 |
| -0.0003111 -0.0004000 0.0000000 |              |              |
| 194: 17 13 4 1 16 12 5 0        | 1359.2335600 | 1359.2337028 |
| -0.0001428 -0.0004000 0.0000000 |              |              |
| 195: 19 13 6 1 18 12 7 0        | 1359.7404600 | 1359.7408423 |
| -0.0003823 -0.0004000 0.0000000 |              |              |
| 196: 28 13 15 1 27 12 16 0      | 1362.0171900 | 1362.0170860 |
| 0.0001040 -0.0004000 0.0000000  |              |              |
| 197: 29 13 16 1 28 12 17 0      | 1362.2697500 | 1362.2693403 |
| 0.0004097 -0.0004000 0.0000000  |              |              |
| 198: 31 13 18 1 30 12 19 0      | 1362.7737300 | 1362.7734080 |
| 0.0003220 -0.0004000 0.0000000  |              |              |
| 199: 32 13 19 1 31 12 20 0      | 1363.0256000 | 1363.0252136 |
| 0.0003864 -0.0004000 0.0000000  |              |              |
| 200: 35 13 22 1 34 12 23 0      | 1363.7788900 | 1363.7796688 |
| -0.0007788 -0.0004000 0.0000000 |              |              |
| 201: 36 13 23 1 35 12 24 0      | 1364.0304900 | 1364.0308194 |
| -0.0003294 -0.0004000 0.0000000 |              |              |
| 202: 40 13 27 1 39 12 28 0      | 1365.0339800 | 1365.0336328 |
| 0.0003472 -0.0004000 0.0000000  |              |              |
| 203: 15 13 3 1 14 12 2 0        | 1358.7258300 | 1358.7261411 |
| -0.0003111 -0.0004000 0.0000000 |              |              |
| 204: 17 13 5 1 16 12 4 0        | 1359.2335600 | 1359.2337028 |
| -0.0001428 -0.0004000 0.0000000 |              |              |
| 205: 19 13 7 1 18 12 6 0        | 1359.7404600 | 1359.7408423 |
| -0.0003823 -0.0004000 0.0000000 |              |              |
| 206: 28 13 16 1 27 12 15 0      | 1362.0171900 | 1362.0170860 |
| 0.0001040 -0.0004000 0.0000000  |              |              |
| 207: 29 13 17 1 28 12 16 0      | 1362.2697500 | 1362.2693403 |
| 0.0004097 -0.0004000 0.0000000  |              |              |
| 208: 31 13 19 1 30 12 18 0      | 1362.7737300 | 1362.7734080 |
| 0.0003220 -0.0004000 0.0000000  |              |              |
| 209: 32 13 20 1 31 12 19 0      | 1363.0256000 | 1363.0252136 |
| 0.0003864 -0.0004000 0.0000000  |              |              |
| 210: 35 13 23 1 34 12 22 0      | 1363.7788900 | 1363.7796688 |
| -0.0007788 -0.0004000 0.0000000 |              |              |
| 211: 36 13 24 1 35 12 23 0      | 1364.0304900 | 1364.0308194 |
| -0.0003294 -0.0004000 0.0000000 |              |              |
| 212: 40 13 28 1 39 12 27 0      | 1365.0339800 | 1365.0336328 |
| 0.0003472 -0.0004000 0.0000000  |              |              |
| 213: 14 14 0 1 13 13 1 0        | 1360.6109700 | 1360.6105617 |
| 0.0004083 -0.0004000 0.0000000  |              |              |
| 214: 19 14 5 1 18 13 6 0        | 1361.8799800 | 1361.8798559 |
| 0.0001241 -0.0004000 0.0000000  |              |              |
| 215: 20 14 6 1 19 13 7 0        | 1362.1340700 | 1362.1334086 |
| 0.0006614 -0.0004000 0.0000000  |              |              |
| 216: 22 14 8 1 21 13 9 0        | 1362.6397800 | 1362.6401857 |
| -0.0004057 -0.0004000 0.0000000 |              |              |
| 217: 23 14 9 1 22 13 10 0       | 1362.8937500 | 1362.8934044 |
| 0.0003456 -0.0004000 0.0000000  |              |              |
| 218: 24 14 10 1 23 13 11 0      | 1363.1463100 | 1363.1465057 |
| -0.0001957 -0.0004000 0.0000000 |              |              |
| 219: 25 14 11 1 24 13 12 0      | 1363.3999900 | 1363.3994867 |
| 0.0005033 -0.0004000 0.0000000  |              |              |
| 220: 26 14 12 1 25 13 13 0      | 1363.6534100 | 1363.6523442 |
| 0.0010658 -0.0004000 0.0000000  |              |              |
| 221: 27 14 13 1 26 13 14 0      | 1363.9059600 | 1363.9050751 |
| 0.0008849 -0.0004000 0.0000000  |              |              |
| 222: 29 14 15 1 28 13 16 0      | 1364.4097500 | 1364.4101435 |
| -0.0003935 -0.0004000 0.0000000 |              |              |
| 223: 14 14 1 1 13 13 0 0        | 1360.6109700 | 1360.6105617 |
| 0.0004083 -0.0004000 0.0000000  |              |              |
| 224: 19 14 6 1 18 13 5 0        | 1361.8799800 | 1361.8798559 |
| 0.0001241 -0.0004000 0.0000000  |              |              |
| 225: 20 14 7 1 19 13 6 0        | 1362.1340700 | 1362.1334086 |



|            |            |           |    |   |    |    |    |   |  |              |              |
|------------|------------|-----------|----|---|----|----|----|---|--|--------------|--------------|
| 0.0006614  | -0.0004000 | 0.0000000 |    |   |    |    |    |   |  |              |              |
| 226:       | 22         | 14        | 9  | 1 | 21 | 13 | 8  | 0 |  | 1362.6397800 | 1362.6401857 |
| -0.0004057 | -0.0004000 | 0.0000000 |    |   |    |    |    |   |  |              |              |
| 227:       | 23         | 14        | 10 | 1 | 22 | 13 | 9  | 0 |  | 1362.8937500 | 1362.8934044 |
| 0.0003456  | -0.0004000 | 0.0000000 |    |   |    |    |    |   |  |              |              |
| 228:       | 24         | 14        | 11 | 1 | 23 | 13 | 10 | 0 |  | 1363.1463100 | 1363.1465057 |
| -0.0001957 | -0.0004000 | 0.0000000 |    |   |    |    |    |   |  |              |              |
| 229:       | 25         | 14        | 12 | 1 | 24 | 13 | 11 | 0 |  | 1363.3999900 | 1363.3994867 |
| 0.0005033  | -0.0004000 | 0.0000000 |    |   |    |    |    |   |  |              |              |
| 230:       | 26         | 14        | 13 | 1 | 25 | 13 | 12 | 0 |  | 1363.6534100 | 1363.6523442 |
| 0.0010658  | -0.0004000 | 0.0000000 |    |   |    |    |    |   |  |              |              |
| 231:       | 27         | 14        | 14 | 1 | 26 | 13 | 13 | 0 |  | 1363.9059600 | 1363.9050751 |
| 0.0008849  | -0.0004000 | 0.0000000 |    |   |    |    |    |   |  |              |              |
| 232:       | 29         | 14        | 16 | 1 | 28 | 13 | 15 | 0 |  | 1364.4097500 | 1364.4101435 |
| -0.0003935 | -0.0004000 | 0.0000000 |    |   |    |    |    |   |  |              |              |
| 233:       | 35         | 14        | 22 | 1 | 34 | 13 | 21 | 0 |  | 1365.9216600 | 1365.9219547 |
| -0.0002947 | -0.0004000 | 0.0000000 |    |   |    |    |    |   |  |              |              |
| 234:       | 21         | 15        | 6  | 1 | 20 | 14 | 7  | 0 |  | 1364.4912300 | 1364.4909803 |
| 0.0002497  | -0.0004000 | 0.0000000 |    |   |    |    |    |   |  |              |              |
| 235:       | 22         | 15        | 7  | 1 | 21 | 14 | 8  | 0 |  | 1364.7443900 | 1364.7444697 |
| -0.0000797 | -0.0004000 | 0.0000000 |    |   |    |    |    |   |  |              |              |
| 236:       | 23         | 15        | 8  | 1 | 22 | 14 | 9  | 0 |  | 1364.9977400 | 1364.9978504 |
| -0.0001104 | -0.0004000 | 0.0000000 |    |   |    |    |    |   |  |              |              |
| 237:       | 25         | 15        | 10 | 1 | 24 | 14 | 11 | 0 |  | 1365.5042700 | 1365.5042746 |
| -0.0000046 | -0.0004000 | 0.0000000 |    |   |    |    |    |   |  |              |              |
| 238:       | 29         | 15        | 14 | 1 | 28 | 14 | 15 | 0 |  | 1366.5146900 | 1366.5156928 |
| -0.0010028 | -0.0004000 | 0.0000000 |    |   |    |    |    |   |  |              |              |
| 239:       | 31         | 15        | 16 | 1 | 30 | 14 | 17 | 0 |  | 1367.0202800 | 1367.0206382 |
| -0.0003582 | -0.0004000 | 0.0000000 |    |   |    |    |    |   |  |              |              |
| 240:       | 33         | 15        | 18 | 1 | 32 | 14 | 19 | 0 |  | 1367.5253200 | 1367.5250407 |
| 0.0002793  | -0.0004000 | 0.0000000 |    |   |    |    |    |   |  |              |              |
| 241:       | 21         | 15        | 7  | 1 | 20 | 14 | 6  | 0 |  | 1364.4912300 | 1364.4909803 |
| 0.0002497  | -0.0004000 | 0.0000000 |    |   |    |    |    |   |  |              |              |
| 242:       | 22         | 15        | 8  | 1 | 21 | 14 | 7  | 0 |  | 1364.7443900 | 1364.7444697 |
| -0.0000797 | -0.0004000 | 0.0000000 |    |   |    |    |    |   |  |              |              |
| 243:       | 23         | 15        | 9  | 1 | 22 | 14 | 8  | 0 |  | 1364.9977400 | 1364.9978504 |
| -0.0001104 | -0.0004000 | 0.0000000 |    |   |    |    |    |   |  |              |              |
| 244:       | 25         | 15        | 11 | 1 | 24 | 14 | 10 | 0 |  | 1365.5042700 | 1365.5042746 |
| -0.0000046 | -0.0004000 | 0.0000000 |    |   |    |    |    |   |  |              |              |
| 245:       | 29         | 15        | 15 | 1 | 28 | 14 | 14 | 0 |  | 1366.5146900 | 1366.5156928 |
| -0.0010028 | -0.0004000 | 0.0000000 |    |   |    |    |    |   |  |              |              |
| 246:       | 31         | 15        | 17 | 1 | 30 | 14 | 16 | 0 |  | 1367.0202800 | 1367.0206382 |
| -0.0003582 | -0.0004000 | 0.0000000 |    |   |    |    |    |   |  |              |              |
| 247:       | 33         | 15        | 19 | 1 | 32 | 14 | 18 | 0 |  | 1367.5253200 | 1367.5250407 |
| 0.0002793  | -0.0004000 | 0.0000000 |    |   |    |    |    |   |  |              |              |
| 248:       | 94         | 0         | 94 | 1 | 95 | 0  | 95 | 0 |  | 1301.6615600 | 1301.6612429 |
| 0.0003171  | -0.0004000 | 0.0000000 |    |   |    |    |    |   |  |              |              |
| 249:       | 92         | 0         | 92 | 1 | 93 | 0  | 93 | 0 |  | 1302.1722300 | 1302.1727769 |
| -0.0005469 | -0.0004000 | 0.0000000 |    |   |    |    |    |   |  |              |              |
| 250:       | 91         | 0         | 91 | 1 | 92 | 0  | 92 | 0 |  | 1302.4281100 | 1302.4284335 |
| -0.0003235 | -0.0004000 | 0.0000000 |    |   |    |    |    |   |  |              |              |
| 251:       | 90         | 0         | 90 | 1 | 91 | 0  | 91 | 0 |  | 1302.6838200 | 1302.6840147 |
| -0.0001947 | -0.0004000 | 0.0000000 |    |   |    |    |    |   |  |              |              |
| 252:       | 89         | 0         | 89 | 1 | 90 | 0  | 90 | 0 |  | 1302.9406800 | 1302.9395193 |
| 0.0011607  | -0.0004000 | 0.0000000 |    |   |    |    |    |   |  |              |              |
| 253:       | 88         | 0         | 88 | 1 | 89 | 0  | 89 | 0 |  | 1303.1956200 | 1303.1949459 |
| 0.0006741  | -0.0004000 | 0.0000000 |    |   |    |    |    |   |  |              |              |
| 254:       | 87         | 0         | 87 | 1 | 88 | 0  | 88 | 0 |  | 1303.4498100 | 1303.4502933 |
| -0.0004833 | -0.0004000 | 0.0000000 |    |   |    |    |    |   |  |              |              |
| 255:       | 86         | 0         | 86 | 1 | 87 | 0  | 87 | 0 |  | 1303.7049500 | 1303.7055602 |
| -0.0006102 | -0.0004000 | 0.0000000 |    |   |    |    |    |   |  |              |              |
| 256:       | 84         | 0         | 84 | 1 | 85 | 0  | 85 | 0 |  | 1304.2162800 | 1304.2158471 |
| 0.0004329  | -0.0004000 | 0.0000000 |    |   |    |    |    |   |  |              |              |
| 257:       | 83         | 0         | 83 | 1 | 84 | 0  | 84 | 0 |  | 1304.4712900 | 1304.4708645 |
| 0.0004255  | -0.0004000 | 0.0000000 |    |   |    |    |    |   |  |              |              |

|            |            |           |      |   |              |              |
|------------|------------|-----------|------|---|--------------|--------------|
| 258: 81    | 0 81       | 1 82      | 0 82 | 0 | 1304.9806200 | 1304.9806406 |
| -0.0000206 | -0.0004000 | 0.0000000 |      |   |              |              |
| 259: 80    | 0 80       | 1 81      | 0 81 | 0 | 1305.2353400 | 1305.2353966 |
| -0.0000566 | -0.0004000 | 0.0000000 |      |   |              |              |
| 260: 78    | 0 78       | 1 79      | 0 79 | 0 | 1305.7447300 | 1305.7446382 |
| 0.0000918  | -0.0004000 | 0.0000000 |      |   |              |              |
| 261: 77    | 0 77       | 1 78      | 0 78 | 0 | 1305.9997200 | 1305.9991210 |
| 0.0005990  | -0.0004000 | 0.0000000 |      |   |              |              |
| 262: 76    | 0 76       | 1 77      | 0 77 | 0 | 1306.2535200 | 1306.2535100 |
| 0.0000100  | -0.0004000 | 0.0000000 |      |   |              |              |
| 263: 75    | 0 75       | 1 76      | 0 76 | 0 | 1306.5075900 | 1306.5078039 |
| -0.0002139 | -0.0004000 | 0.0000000 |      |   |              |              |
| 264: 74    | 0 74       | 1 75      | 0 75 | 0 | 1306.7617100 | 1306.7620013 |
| -0.0002913 | -0.0004000 | 0.0000000 |      |   |              |              |
| 265: 73    | 0 73       | 1 74      | 0 74 | 0 | 1307.0159500 | 1307.0161009 |
| -0.0001509 | -0.0004000 | 0.0000000 |      |   |              |              |
| 266: 72    | 0 72       | 1 73      | 0 73 | 0 | 1307.2703300 | 1307.2701013 |
| 0.0002287  | -0.0004000 | 0.0000000 |      |   |              |              |
| 267: 71    | 0 71       | 1 72      | 0 72 | 0 | 1307.5239000 | 1307.5240011 |
| -0.0001011 | -0.0004000 | 0.0000000 |      |   |              |              |
| 268: 70    | 0 70       | 1 71      | 0 71 | 0 | 1307.7776300 | 1307.7777990 |
| -0.0001690 | -0.0004000 | 0.0000000 |      |   |              |              |
| 269: 69    | 0 69       | 1 70      | 0 70 | 0 | 1308.0316200 | 1308.0314935 |
| 0.0001265  | -0.0004000 | 0.0000000 |      |   |              |              |
| 270: 68    | 0 68       | 1 69      | 0 69 | 0 | 1308.2852900 | 1308.2850832 |
| 0.0002068  | -0.0004000 | 0.0000000 |      |   |              |              |
| 271: 67    | 0 67       | 1 68      | 0 68 | 0 | 1308.5385300 | 1308.5385668 |
| -0.0000368 | -0.0004000 | 0.0000000 |      |   |              |              |
| 272: 66    | 0 66       | 1 67      | 0 67 | 0 | 1308.7920000 | 1308.7919427 |
| 0.0000573  | -0.0004000 | 0.0000000 |      |   |              |              |
| 273: 65    | 0 65       | 1 66      | 0 66 | 0 | 1309.0451800 | 1309.0452096 |
| -0.0000296 | -0.0004000 | 0.0000000 |      |   |              |              |
| 274: 64    | 0 64       | 1 65      | 0 65 | 0 | 1309.2982700 | 1309.2983659 |
| -0.0000959 | -0.0004000 | 0.0000000 |      |   |              |              |
| 275: 63    | 0 63       | 1 64      | 0 64 | 0 | 1309.5513200 | 1309.5514101 |
| -0.0000901 | -0.0004000 | 0.0000000 |      |   |              |              |
| 276: 62    | 0 62       | 1 63      | 0 63 | 0 | 1309.8047600 | 1309.8043409 |
| 0.0004191  | -0.0004000 | 0.0000000 |      |   |              |              |
| 277: 61    | 0 61       | 1 62      | 0 62 | 0 | 1310.0571100 | 1310.0571565 |
| -0.0000465 | -0.0004000 | 0.0000000 |      |   |              |              |
| 278: 60    | 0 60       | 1 61      | 0 61 | 0 | 1310.3096700 | 1310.3098554 |
| -0.0001854 | -0.0004000 | 0.0000000 |      |   |              |              |
| 279: 59    | 0 59       | 1 60      | 0 60 | 0 | 1310.5623300 | 1310.5624360 |
| -0.0001060 | -0.0004000 | 0.0000000 |      |   |              |              |
| 280: 58    | 0 58       | 1 59      | 0 59 | 0 | 1310.8148800 | 1310.8148966 |
| -0.0000166 | -0.0004000 | 0.0000000 |      |   |              |              |
| 281: 57    | 0 57       | 1 58      | 0 58 | 0 | 1311.0672100 | 1311.0672355 |
| -0.0000255 | -0.0004000 | 0.0000000 |      |   |              |              |
| 282: 56    | 0 56       | 1 57      | 0 57 | 0 | 1311.3192300 | 1311.3194509 |
| -0.0002209 | -0.0004000 | 0.0000000 |      |   |              |              |
| 283: 55    | 0 55       | 1 56      | 0 56 | 0 | 1311.5715200 | 1311.5715409 |
| -0.0000209 | -0.0004000 | 0.0000000 |      |   |              |              |
| 284: 54    | 0 54       | 1 55      | 0 55 | 0 | 1311.8234900 | 1311.8235037 |
| -0.0000137 | -0.0004000 | 0.0000000 |      |   |              |              |
| 285: 53    | 0 53       | 1 54      | 0 54 | 0 | 1312.0752900 | 1312.0753371 |
| -0.0000471 | -0.0004000 | 0.0000000 |      |   |              |              |
| 286: 52    | 0 52       | 1 53      | 0 53 | 0 | 1312.3263900 | 1312.3270390 |
| -0.0006490 | -0.0004000 | 0.0000000 |      |   |              |              |
| 287: 51    | 0 51       | 1 52      | 0 52 | 0 | 1312.5786600 | 1312.5786072 |
| 0.0000528  | -0.0004000 | 0.0000000 |      |   |              |              |
| 288: 50    | 0 50       | 1 51      | 0 51 | 0 | 1312.8300600 | 1312.8300392 |
| 0.0000208  | -0.0004000 | 0.0000000 |      |   |              |              |
| 289: 49    | 0 49       | 1 50      | 0 50 | 0 | 1313.0815700 | 1313.0813325 |
| 0.0002375  | -0.0004000 | 0.0000000 |      |   |              |              |
| 290: 47    | 0 47       | 1 48      | 0 48 | 0 | 1313.5837000 | 1313.5834918 |

|            |                  |           |              |              |
|------------|------------------|-----------|--------------|--------------|
| 0.0002082  | -0.0004000       | 0.0000000 |              |              |
| 291: 46    | 0 46 1 47 0 47 0 |           | 1313.8348300 | 1313.8343516 |
| 0.0004784  | -0.0004000       | 0.0000000 |              |              |
| 292: 45    | 0 45 1 46 0 46 0 |           | 1314.0855300 | 1314.0850604 |
| 0.0004696  | -0.0004000       | 0.0000000 |              |              |
| 293: 39    | 0 39 1 40 0 40 0 |           | 1315.5855700 | 1315.5859101 |
| -0.0003401 | -0.0004000       | 0.0000000 |              |              |
| 294: 38    | 0 38 1 39 0 39 0 |           | 1315.8351200 | 1315.8354391 |
| -0.0003191 | -0.0004000       | 0.0000000 |              |              |
| 295: 37    | 0 37 1 38 0 38 0 |           | 1316.0856300 | 1316.0847782 |
| 0.0008518  | -0.0004000       | 0.0000000 |              |              |
| 296: 36    | 0 36 1 37 0 37 0 |           | 1316.3334600 | 1316.3339212 |
| -0.0004612 | -0.0004000       | 0.0000000 |              |              |
| 297: 35    | 0 35 1 36 0 36 0 |           | 1316.5817100 | 1316.5828617 |
| -0.0011517 | -0.0004000       | 0.0000000 |              |              |
| 298: 33    | 0 33 1 34 0 34 0 |           | 1317.0803500 | 1317.0801118 |
| 0.0002382  | -0.0004000       | 0.0000000 |              |              |
| 299: 32    | 0 32 1 33 0 33 0 |           | 1317.3288000 | 1317.3284108 |
| 0.0003892  | -0.0004000       | 0.0000000 |              |              |
| 300: 31    | 0 31 1 32 0 32 0 |           | 1317.5762600 | 1317.5764872 |
| -0.0002272 | -0.0004000       | 0.0000000 |              |              |
| 301: 30    | 0 30 1 31 0 31 0 |           | 1317.8238900 | 1317.8243393 |
| -0.0004493 | -0.0004000       | 0.0000000 |              |              |
| 302: 29    | 0 29 1 30 0 30 0 |           | 1318.0721100 | 1318.0719681 |
| 0.0001419  | -0.0004000       | 0.0000000 |              |              |
| 303: 28    | 0 28 1 29 0 29 0 |           | 1318.3198600 | 1318.3193784 |
| 0.0004816  | -0.0004000       | 0.0000000 |              |              |
| 304: 27    | 0 27 1 28 0 28 0 |           | 1318.5664400 | 1318.5665795 |
| -0.0001395 | -0.0004000       | 0.0000000 |              |              |
| 305: 26    | 0 26 1 27 0 27 0 |           | 1318.8135600 | 1318.8135867 |
| -0.0000267 | -0.0004000       | 0.0000000 |              |              |
| 306: 25    | 0 25 1 26 0 26 0 |           | 1319.0603800 | 1319.0604225 |
| -0.0000425 | -0.0004000       | 0.0000000 |              |              |
| 307: 24    | 0 24 1 25 0 25 0 |           | 1319.3073500 | 1319.3071176 |
| 0.0002324  | -0.0004000       | 0.0000000 |              |              |
| 308: 23    | 0 23 1 24 0 24 0 |           | 1319.5531800 | 1319.5537124 |
| -0.0005324 | -0.0004000       | 0.0000000 |              |              |
| 309: 22    | 0 22 1 23 0 23 0 |           | 1319.8002600 | 1319.8002566 |
| 0.0000034  | -0.0004000       | 0.0000000 |              |              |
| 310: 21    | 0 21 1 22 0 22 0 |           | 1320.0468700 | 1320.0468104 |
| 0.0000596  | -0.0004000       | 0.0000000 |              |              |
| 311: 20    | 0 20 1 21 0 21 0 |           | 1320.2933300 | 1320.2934425 |
| -0.0001125 | -0.0004000       | 0.0000000 |              |              |
| 312: 19    | 0 19 1 20 0 20 0 |           | 1320.5400800 | 1320.5402295 |
| -0.0001495 | -0.0004000       | 0.0000000 |              |              |
| 313: 18    | 0 18 1 19 0 19 0 |           | 1320.7873000 | 1320.7872523 |
| 0.0000477  | -0.0004000       | 0.0000000 |              |              |
| 314: 17    | 0 17 1 18 0 18 0 |           | 1321.0351300 | 1321.0345937 |
| 0.0005363  | -0.0004000       | 0.0000000 |              |              |
| 315: 16    | 0 16 1 17 0 17 0 |           | 1321.2821800 | 1321.2823335 |
| -0.0001535 | -0.0004000       | 0.0000000 |              |              |
| 316: 15    | 0 15 1 16 0 16 0 |           | 1321.5304700 | 1321.5305449 |
| -0.0000749 | -0.0004000       | 0.0000000 |              |              |
| 317: 14    | 0 14 1 15 0 15 0 |           | 1321.7792700 | 1321.7792906 |
| -0.0000206 | -0.0004000       | 0.0000000 |              |              |
| 318: 13    | 0 13 1 14 0 14 0 |           | 1322.0286100 | 1322.0286196 |
| -0.0000096 | -0.0004000       | 0.0000000 |              |              |
| 319: 12    | 0 12 1 13 0 13 0 |           | 1322.2786200 | 1322.2785648 |
| 0.0000552  | -0.0004000       | 0.0000000 |              |              |
| 320: 11    | 0 11 1 12 0 12 0 |           | 1322.5291700 | 1322.5291420 |
| 0.0000280  | -0.0004000       | 0.0000000 |              |              |
| 321: 10    | 0 10 1 11 0 11 0 |           | 1322.7805300 | 1322.7803501 |
| 0.0001799  | -0.0004000       | 0.0000000 |              |              |
| 322: 9     | 0 9 1 10 0 10 0  |           | 1323.0322800 | 1323.0321719 |
| 0.0001081  | -0.0004000       | 0.0000000 |              |              |

|            |            |           |    |   |    |   |    |   |              |              |
|------------|------------|-----------|----|---|----|---|----|---|--------------|--------------|
| 323:       | 8          | 0         | 8  | 1 | 9  | 0 | 9  | 0 | 1323.2844500 | 1323.2845756 |
| -0.0001256 | -0.0004000 | 0.0000000 |    |   |    |   |    |   |              |              |
| 324:       | 7          | 0         | 7  | 1 | 8  | 0 | 8  | 0 | 1323.5371700 | 1323.5375170 |
| -0.0003470 | -0.0004000 | 0.0000000 |    |   |    |   |    |   |              |              |
| 325:       | 6          | 0         | 6  | 1 | 7  | 0 | 7  | 0 | 1323.7908500 | 1323.7909418 |
| -0.0000918 | -0.0004000 | 0.0000000 |    |   |    |   |    |   |              |              |
| 326:       | 4          | 0         | 4  | 1 | 5  | 0 | 5  | 0 | 1324.2991000 | 1324.2989848 |
| 0.0001152  | -0.0004000 | 0.0000000 |    |   |    |   |    |   |              |              |
| 327:       | 3          | 0         | 3  | 1 | 4  | 0 | 4  | 0 | 1324.5531400 | 1324.5534606 |
| -0.0003206 | -0.0004000 | 0.0000000 |    |   |    |   |    |   |              |              |
| 328:       | 3          | 0         | 3  | 1 | 2  | 0 | 2  | 0 | 1326.3353600 | 1326.3357974 |
| -0.0004374 | -0.0004000 | 0.0000000 |    |   |    |   |    |   |              |              |
| 329:       | 4          | 0         | 4  | 1 | 3  | 0 | 3  | 0 | 1326.5898900 | 1326.5895305 |
| 0.0003595  | -0.0004000 | 0.0000000 |    |   |    |   |    |   |              |              |
| 330:       | 5          | 0         | 5  | 1 | 4  | 0 | 4  | 0 | 1326.8424700 | 1326.8427721 |
| -0.0003021 | -0.0004000 | 0.0000000 |    |   |    |   |    |   |              |              |
| 331:       | 6          | 0         | 6  | 1 | 5  | 0 | 5  | 0 | 1327.0958900 | 1327.0954291 |
| 0.0004609  | -0.0004000 | 0.0000000 |    |   |    |   |    |   |              |              |
| 332:       | 7          | 0         | 7  | 1 | 6  | 0 | 6  | 0 | 1327.3471000 | 1327.3474091 |
| -0.0003091 | -0.0004000 | 0.0000000 |    |   |    |   |    |   |              |              |
| 333:       | 8          | 0         | 8  | 1 | 7  | 0 | 7  | 0 | 1327.5985000 | 1327.5986215 |
| -0.0001215 | -0.0004000 | 0.0000000 |    |   |    |   |    |   |              |              |
| 334:       | 9          | 0         | 9  | 1 | 8  | 0 | 8  | 0 | 1327.8488500 | 1327.8489791 |
| -0.0001291 | -0.0004000 | 0.0000000 |    |   |    |   |    |   |              |              |
| 335:       | 10         | 0         | 10 | 1 | 9  | 0 | 9  | 0 | 1328.0982500 | 1328.0984013 |
| -0.0001513 | -0.0004000 | 0.0000000 |    |   |    |   |    |   |              |              |
| 336:       | 11         | 0         | 11 | 1 | 10 | 0 | 10 | 0 | 1328.3469700 | 1328.3468160 |
| 0.0001540  | -0.0004000 | 0.0000000 |    |   |    |   |    |   |              |              |
| 337:       | 12         | 0         | 12 | 1 | 11 | 0 | 11 | 0 | 1328.5940300 | 1328.5941636 |
| -0.0001336 | -0.0004000 | 0.0000000 |    |   |    |   |    |   |              |              |
| 338:       | 13         | 0         | 13 | 1 | 12 | 0 | 12 | 0 | 1328.8405400 | 1328.8403997 |
| 0.0001403  | -0.0004000 | 0.0000000 |    |   |    |   |    |   |              |              |
| 339:       | 14         | 0         | 14 | 1 | 13 | 0 | 13 | 0 | 1329.0856100 | 1329.0854980 |
| 0.0001120  | -0.0004000 | 0.0000000 |    |   |    |   |    |   |              |              |
| 340:       | 15         | 0         | 15 | 1 | 14 | 0 | 14 | 0 | 1329.3291900 | 1329.3294529 |
| -0.0002629 | -0.0004000 | 0.0000000 |    |   |    |   |    |   |              |              |
| 341:       | 16         | 0         | 16 | 1 | 15 | 0 | 15 | 0 | 1329.5725700 | 1329.5722802 |
| 0.0002898  | -0.0004000 | 0.0000000 |    |   |    |   |    |   |              |              |
| 342:       | 17         | 0         | 17 | 1 | 16 | 0 | 16 | 0 | 1329.8141400 | 1329.8140173 |
| 0.0001227  | -0.0004000 | 0.0000000 |    |   |    |   |    |   |              |              |
| 343:       | 18         | 0         | 18 | 1 | 17 | 0 | 17 | 0 | 1330.0549600 | 1330.0547214 |
| 0.0002386  | -0.0004000 | 0.0000000 |    |   |    |   |    |   |              |              |
| 344:       | 19         | 0         | 19 | 1 | 18 | 0 | 18 | 0 | 1330.2945200 | 1330.2944661 |
| 0.0000539  | -0.0004000 | 0.0000000 |    |   |    |   |    |   |              |              |
| 345:       | 20         | 0         | 20 | 1 | 19 | 0 | 19 | 0 | 1330.5328800 | 1330.5333379 |
| -0.0004579 | -0.0004000 | 0.0000000 |    |   |    |   |    |   |              |              |
| 346:       | 21         | 0         | 21 | 1 | 20 | 0 | 20 | 0 | 1330.7717800 | 1330.7714303 |
| 0.0003497  | -0.0004000 | 0.0000000 |    |   |    |   |    |   |              |              |
| 347:       | 22         | 0         | 22 | 1 | 21 | 0 | 21 | 0 | 1331.0089200 | 1331.0088397 |
| 0.0000803  | -0.0004000 | 0.0000000 |    |   |    |   |    |   |              |              |
| 348:       | 23         | 0         | 23 | 1 | 22 | 0 | 22 | 0 | 1331.2455800 | 1331.2456600 |
| -0.0000800 | -0.0004000 | 0.0000000 |    |   |    |   |    |   |              |              |
| 349:       | 24         | 0         | 24 | 1 | 23 | 0 | 23 | 0 | 1331.4823600 | 1331.4819792 |
| 0.0003808  | -0.0004000 | 0.0000000 |    |   |    |   |    |   |              |              |
| 350:       | 25         | 0         | 25 | 1 | 24 | 0 | 24 | 0 | 1331.7178800 | 1331.7178762 |
| 0.0000038  | -0.0004000 | 0.0000000 |    |   |    |   |    |   |              |              |
| 351:       | 26         | 0         | 26 | 1 | 25 | 0 | 25 | 0 | 1331.9540500 | 1331.9534191 |
| 0.0006309  | -0.0004000 | 0.0000000 |    |   |    |   |    |   |              |              |
| 352:       | 27         | 0         | 27 | 1 | 26 | 0 | 26 | 0 | 1332.1888700 | 1332.1886648 |
| 0.0002052  | -0.0004000 | 0.0000000 |    |   |    |   |    |   |              |              |
| 353:       | 28         | 0         | 28 | 1 | 27 | 0 | 27 | 0 | 1332.4236700 | 1332.4236586 |
| 0.0000114  | -0.0004000 | 0.0000000 |    |   |    |   |    |   |              |              |
| 354:       | 29         | 0         | 29 | 1 | 28 | 0 | 28 | 0 | 1332.6581200 | 1332.6584354 |
| -0.0003154 | -0.0004000 | 0.0000000 |    |   |    |   |    |   |              |              |
| 355:       | 30         | 0         | 30 | 1 | 29 | 0 | 29 | 0 | 1332.8921200 | 1332.8930204 |

|            |            |           |              |              |
|------------|------------|-----------|--------------|--------------|
| -0.0009004 | -0.0004000 | 0.0000000 |              |              |
| 356: 31    | 0 31       | 1 30      | 0 30         | 0            |
|            |            |           | 1333.1268700 | 1333.1274309 |
| -0.0005609 | -0.0004000 | 0.0000000 |              |              |
| 357: 32    | 0 32       | 1 31      | 0 31         | 0            |
|            |            |           | 1333.3612200 | 1333.3616774 |
| -0.0004574 | -0.0004000 | 0.0000000 |              |              |
| 358: 33    | 0 33       | 1 32      | 0 32         | 0            |
|            |            |           | 1333.5960400 | 1333.5957650 |
| 0.0002750  | -0.0004000 | 0.0000000 |              |              |
| 359: 34    | 0 34       | 1 33      | 0 33         | 0            |
|            |            |           | 1333.8298300 | 1333.8296947 |
| 0.0001353  | -0.0004000 | 0.0000000 |              |              |
| 360: 35    | 0 35       | 1 34      | 0 34         | 0            |
|            |            |           | 1334.0634300 | 1334.0634643 |
| -0.0000343 | -0.0004000 | 0.0000000 |              |              |
| 361: 36    | 0 36       | 1 35      | 0 35         | 0            |
|            |            |           | 1334.2973100 | 1334.2970692 |
| 0.0002408  | -0.0004000 | 0.0000000 |              |              |
| 362: 37    | 0 37       | 1 36      | 0 36         | 0            |
|            |            |           | 1334.5305400 | 1334.5305035 |
| 0.0000365  | -0.0004000 | 0.0000000 |              |              |
| 363: 38    | 0 38       | 1 37      | 0 37         | 0            |
|            |            |           | 1334.7641800 | 1334.7637603 |
| 0.0004197  | -0.0004000 | 0.0000000 |              |              |
| 364: 39    | 0 39       | 1 38      | 0 38         | 0            |
|            |            |           | 1334.9968900 | 1334.9968319 |
| 0.0000581  | -0.0004000 | 0.0000000 |              |              |
| 365: 41    | 0 41       | 1 40      | 0 40         | 0            |
|            |            |           | 1335.4622600 | 1335.4623886 |
| -0.0001286 | -0.0004000 | 0.0000000 |              |              |
| 366: 42    | 0 42       | 1 41      | 0 41         | 0            |
|            |            |           | 1335.6949600 | 1335.6948584 |
| 0.0001016  | -0.0004000 | 0.0000000 |              |              |
| 367: 43    | 0 43       | 1 42      | 0 42         | 0            |
|            |            |           | 1335.9275800 | 1335.9271127 |
| 0.0004673  | -0.0004000 | 0.0000000 |              |              |
| 368: 44    | 0 44       | 1 43      | 0 43         | 0            |
|            |            |           | 1336.1594200 | 1336.1591447 |
| 0.0002753  | -0.0004000 | 0.0000000 |              |              |
| 369: 45    | 0 45       | 1 44      | 0 44         | 0            |
|            |            |           | 1336.3906500 | 1336.3909478 |
| -0.0002978 | -0.0004000 | 0.0000000 |              |              |
| 370: 52    | 0 52       | 1 51      | 0 51         | 0            |
|            |            |           | 1338.0061800 | 1338.0067000 |
| -0.0005200 | -0.0004000 | 0.0000000 |              |              |
| 371: 53    | 0 53       | 1 52      | 0 52         | 0            |
|            |            |           | 1338.2359500 | 1338.2364858 |
| -0.0005358 | -0.0004000 | 0.0000000 |              |              |
| 372: 54    | 0 54       | 1 53      | 0 53         | 0            |
|            |            |           | 1338.4656700 | 1338.4660013 |
| -0.0003313 | -0.0004000 | 0.0000000 |              |              |
| 373: 55    | 0 55       | 1 54      | 0 54         | 0            |
|            |            |           | 1338.6948500 | 1338.6952433 |
| -0.0003933 | -0.0004000 | 0.0000000 |              |              |
| 374: 56    | 0 56       | 1 55      | 0 55         | 0            |
|            |            |           | 1338.9239800 | 1338.9242090 |
| -0.0002290 | -0.0004000 | 0.0000000 |              |              |
| 375: 57    | 0 57       | 1 56      | 0 56         | 0            |
|            |            |           | 1339.1529000 | 1339.1528956 |
| 0.0000044  | -0.0004000 | 0.0000000 |              |              |
| 376: 58    | 0 58       | 1 57      | 0 57         | 0            |
|            |            |           | 1339.3810000 | 1339.3813005 |
| -0.0003005 | -0.0004000 | 0.0000000 |              |              |
| 377: 59    | 0 59       | 1 58      | 0 58         | 0            |
|            |            |           | 1339.6092600 | 1339.6094212 |
| -0.0001612 | -0.0004000 | 0.0000000 |              |              |
| 378: 60    | 0 60       | 1 59      | 0 59         | 0            |
|            |            |           | 1339.8370500 | 1339.8372553 |
| -0.0002053 | -0.0004000 | 0.0000000 |              |              |
| 379: 61    | 0 61       | 1 60      | 0 60         | 0            |
|            |            |           | 1340.0648600 | 1340.0648008 |
| 0.0000592  | -0.0004000 | 0.0000000 |              |              |
| 380: 62    | 0 62       | 1 61      | 0 61         | 0            |
|            |            |           | 1340.2920400 | 1340.2920553 |
| -0.0000153 | -0.0004000 | 0.0000000 |              |              |
| 381: 63    | 0 63       | 1 62      | 0 62         | 0            |
|            |            |           | 1340.5191800 | 1340.5190169 |
| 0.0001631  | -0.0004000 | 0.0000000 |              |              |
| 382: 64    | 0 64       | 1 63      | 0 63         | 0            |
|            |            |           | 1340.7458400 | 1340.7456836 |
| 0.0001564  | -0.0004000 | 0.0000000 |              |              |
| 383: 65    | 0 65       | 1 64      | 0 64         | 0            |
|            |            |           | 1340.9722300 | 1340.9720534 |
| 0.0001766  | -0.0004000 | 0.0000000 |              |              |
| 384: 66    | 0 66       | 1 65      | 0 65         | 0            |
|            |            |           | 1341.1981500 | 1341.1981245 |
| 0.0000255  | -0.0004000 | 0.0000000 |              |              |
| 385: 67    | 0 67       | 1 66      | 0 66         | 0            |
|            |            |           | 1341.4240700 | 1341.4238951 |
| 0.0001749  | -0.0004000 | 0.0000000 |              |              |
| 386: 68    | 0 68       | 1 67      | 0 67         | 0            |
|            |            |           | 1341.6493800 | 1341.6493634 |
| 0.0000166  | -0.0004000 | 0.0000000 |              |              |
| 387: 69    | 0 69       | 1 68      | 0 68         | 0            |
|            |            |           | 1341.8743300 | 1341.8745276 |
| -0.0001976 | -0.0004000 | 0.0000000 |              |              |

|            |            |           |      |   |              |              |
|------------|------------|-----------|------|---|--------------|--------------|
| 388: 70    | 0 70       | 1 69      | 0 69 | 0 | 1342.0995000 | 1342.0993860 |
| 0.0001140  | -0.0004000 | 0.0000000 |      |   |              |              |
| 389: 71    | 0 71       | 1 70      | 0 70 | 0 | 1342.3240000 | 1342.3239370 |
| 0.0000630  | -0.0004000 | 0.0000000 |      |   |              |              |
| 390: 72    | 0 72       | 1 71      | 0 71 | 0 | 1342.5479300 | 1342.5481788 |
| -0.0002488 | -0.0004000 | 0.0000000 |      |   |              |              |
| 391: 73    | 0 73       | 1 72      | 0 72 | 0 | 1342.7721700 | 1342.7721099 |
| 0.0000601  | -0.0004000 | 0.0000000 |      |   |              |              |
| 392: 74    | 0 74       | 1 73      | 0 73 | 0 | 1342.9955900 | 1342.9957286 |
| -0.0001386 | -0.0004000 | 0.0000000 |      |   |              |              |
| 393: 75    | 0 75       | 1 74      | 0 74 | 0 | 1343.2195600 | 1343.2190332 |
| 0.0005268  | -0.0004000 | 0.0000000 |      |   |              |              |
| 394: 76    | 0 76       | 1 75      | 0 75 | 0 | 1343.4421300 | 1343.4420223 |
| 0.0001077  | -0.0004000 | 0.0000000 |      |   |              |              |
| 395: 77    | 0 77       | 1 76      | 0 76 | 0 | 1343.6647800 | 1343.6646941 |
| 0.0000859  | -0.0004000 | 0.0000000 |      |   |              |              |
| 396: 78    | 0 78       | 1 77      | 0 77 | 0 | 1343.8868800 | 1343.8870472 |
| -0.0001672 | -0.0004000 | 0.0000000 |      |   |              |              |
| 397: 79    | 0 79       | 1 78      | 0 78 | 0 | 1344.1090200 | 1344.1090799 |
| -0.0000599 | -0.0004000 | 0.0000000 |      |   |              |              |
| 398: 80    | 0 80       | 1 79      | 0 79 | 0 | 1344.3307900 | 1344.3307908 |
| -0.0000008 | -0.0004000 | 0.0000000 |      |   |              |              |
| 399: 81    | 0 81       | 1 80      | 0 80 | 0 | 1344.5522700 | 1344.5521781 |
| 0.0000919  | -0.0004000 | 0.0000000 |      |   |              |              |
| 400: 82    | 0 82       | 1 81      | 0 81 | 0 | 1344.7730700 | 1344.7732405 |
| -0.0001705 | -0.0004000 | 0.0000000 |      |   |              |              |
| 401: 83    | 0 83       | 1 82      | 0 82 | 0 | 1344.9938800 | 1344.9939763 |
| -0.0000963 | -0.0004000 | 0.0000000 |      |   |              |              |
| 402: 84    | 0 84       | 1 83      | 0 83 | 0 | 1345.2140300 | 1345.2143840 |
| -0.0003540 | -0.0004000 | 0.0000000 |      |   |              |              |
| 403: 85    | 0 85       | 1 84      | 0 84 | 0 | 1345.4344100 | 1345.4344621 |
| -0.0000521 | -0.0004000 | 0.0000000 |      |   |              |              |
| 404: 86    | 0 86       | 1 85      | 0 85 | 0 | 1345.6542700 | 1345.6542090 |
| 0.0000610  | -0.0004000 | 0.0000000 |      |   |              |              |
| 405: 87    | 0 87       | 1 86      | 0 86 | 0 | 1345.8739500 | 1345.8736232 |
| 0.0003268  | -0.0004000 | 0.0000000 |      |   |              |              |
| 406: 88    | 0 88       | 1 87      | 0 87 | 0 | 1346.0924800 | 1346.0927031 |
| -0.0002231 | -0.0004000 | 0.0000000 |      |   |              |              |
| 407: 89    | 0 89       | 1 88      | 0 88 | 0 | 1346.3119700 | 1346.3114474 |
| 0.0005226  | -0.0004000 | 0.0000000 |      |   |              |              |
| 408: 90    | 0 90       | 1 89      | 0 89 | 0 | 1346.5288700 | 1346.5298543 |
| -0.0009843 | -0.0004000 | 0.0000000 |      |   |              |              |
| 409: 91    | 0 91       | 1 90      | 0 90 | 0 | 1346.7475300 | 1346.7479224 |
| -0.0003924 | -0.0004000 | 0.0000000 |      |   |              |              |
| 410: 88    | 1 87       | 1 89      | 1 88 | 0 | 1302.9416600 | 1302.9417979 |
| -0.0001379 | -0.0004000 | 0.0000000 |      |   |              |              |
| 411: 87    | 1 86       | 1 88      | 1 87 | 0 | 1303.1971800 | 1303.1972795 |
| -0.0000995 | -0.0004000 | 0.0000000 |      |   |              |              |
| 412: 85    | 1 84       | 1 86      | 1 85 | 0 | 1303.7084200 | 1303.7080003 |
| 0.0004197  | -0.0004000 | 0.0000000 |      |   |              |              |
| 413: 84    | 1 83       | 1 85      | 1 84 | 0 | 1303.9627800 | 1303.9632366 |
| -0.0004566 | -0.0004000 | 0.0000000 |      |   |              |              |
| 414: 83    | 1 82       | 1 84      | 1 83 | 0 | 1304.2176900 | 1304.2183882 |
| -0.0006982 | -0.0004000 | 0.0000000 |      |   |              |              |
| 415: 82    | 1 81       | 1 83      | 1 82 | 0 | 1304.4738200 | 1304.4734535 |
| 0.0003665  | -0.0004000 | 0.0000000 |      |   |              |              |
| 416: 81    | 1 80       | 1 82      | 1 81 | 0 | 1304.7287800 | 1304.7284310 |
| 0.0003490  | -0.0004000 | 0.0000000 |      |   |              |              |
| 417: 80    | 1 79       | 1 81      | 1 80 | 0 | 1304.9839900 | 1304.9833190 |
| 0.0006710  | -0.0004000 | 0.0000000 |      |   |              |              |
| 418: 78    | 1 77       | 1 79      | 1 78 | 0 | 1305.4930500 | 1305.4928201 |
| 0.0002299  | -0.0004000 | 0.0000000 |      |   |              |              |
| 419: 77    | 1 76       | 1 78      | 1 77 | 0 | 1305.7476800 | 1305.7474296 |
| 0.0002504  | -0.0004000 | 0.0000000 |      |   |              |              |
| 420: 75    | 1 74       | 1 76      | 1 75 | 0 | 1306.2559800 | 1306.2563576 |

|            |            |           |              |              |
|------------|------------|-----------|--------------|--------------|
| -0.0003776 | -0.0004000 | 0.0000000 |              |              |
| 421: 73    | 1 72       | 1 74      | 1 73         | 0            |
| 0.0000159  | -0.0004000 | 0.0000000 | 1306.7649000 | 1306.7648841 |
| 422: 71    | 1 70       | 1 72      | 1 71         | 0            |
| 0.0003382  | -0.0004000 | 0.0000000 | 1307.2733300 | 1307.2729918 |
| 423: 70    | 1 69       | 1 71      | 1 70         | 0            |
| 0.0004274  | -0.0004000 | 0.0000000 | 1307.5273100 | 1307.5268826 |
| 424: 69    | 1 68       | 1 70      | 1 69         | 0            |
| 0.0006888  | -0.0004000 | 0.0000000 | 1307.7813500 | 1307.7806612 |
| 425: 68    | 1 67       | 1 69      | 1 68         | 0            |
| 0.0004652  | -0.0004000 | 0.0000000 | 1308.0347900 | 1308.0343248 |
| 426: 67    | 1 66       | 1 68      | 1 67         | 0            |
| 0.0008196  | -0.0004000 | 0.0000000 | 1308.2886900 | 1308.2878704 |
| 427: 66    | 1 65       | 1 67      | 1 66         | 0            |
| 0.0009655  | -0.0004000 | 0.0000000 | 1308.5422600 | 1308.5412945 |
| 428: 65    | 1 64       | 1 66      | 1 65         | 0            |
| 0.0011064  | -0.0004000 | 0.0000000 | 1308.7957000 | 1308.7945936 |
| 429: 59    | 1 58       | 1 60      | 1 59         | 0            |
| 0.0002858  | -0.0004000 | 0.0000000 | 1310.3118100 | 1310.3115242 |
| 430: 58    | 1 57       | 1 59      | 1 58         | 0            |
| -0.0002908 | -0.0004000 | 0.0000000 | 1310.5635300 | 1310.5638208 |
| 431: 57    | 1 56       | 1 58      | 1 57         | 0            |
| -0.0002213 | -0.0004000 | 0.0000000 | 1310.8157300 | 1310.8159513 |
| 432: 56    | 1 55       | 1 57      | 1 56         | 0            |
| -0.0007787 | -0.0004000 | 0.0000000 | 1311.0671300 | 1311.0679087 |
| 433: 55    | 1 54       | 1 56      | 1 55         | 0            |
| -0.0005256 | -0.0004000 | 0.0000000 | 1311.3191600 | 1311.3196856 |
| 434: 54    | 1 53       | 1 55      | 1 54         | 0            |
| 0.0000656  | -0.0004000 | 0.0000000 | 1311.5713400 | 1311.5712744 |
| 435: 53    | 1 52       | 1 54      | 1 53         | 0            |
| -0.0001273 | -0.0004000 | 0.0000000 | 1311.8225400 | 1311.8226673 |
| 436: 52    | 1 51       | 1 53      | 1 52         | 0            |
| 0.0002535  | -0.0004000 | 0.0000000 | 1312.0741100 | 1312.0738565 |
| 437: 50    | 1 49       | 1 51      | 1 50         | 0            |
| -0.0002737 | -0.0004000 | 0.0000000 | 1312.5753200 | 1312.5755937 |
| 438: 49    | 1 48       | 1 50      | 1 49         | 0            |
| 0.0001117  | -0.0004000 | 0.0000000 | 1312.8262400 | 1312.8261283 |
| 439: 48    | 1 47       | 1 49      | 1 48         | 0            |
| 0.0000365  | -0.0004000 | 0.0000000 | 1313.0764700 | 1313.0764335 |
| 440: 47    | 1 46       | 1 48      | 1 47         | 0            |
| -0.0003063 | -0.0004000 | 0.0000000 | 1313.3262000 | 1313.3265063 |
| 441: 46    | 1 45       | 1 47      | 1 46         | 0            |
| -0.0000467 | -0.0004000 | 0.0000000 | 1313.5763000 | 1313.5763467 |
| 442: 45    | 1 44       | 1 46      | 1 45         | 0            |
| 0.0002518  | -0.0004000 | 0.0000000 | 1313.8262100 | 1313.8259582 |
| 443: 44    | 1 43       | 1 45      | 1 44         | 0            |
| 0.0003413  | -0.0004000 | 0.0000000 | 1314.0756900 | 1314.0753487 |
| 444: 43    | 1 42       | 1 44      | 1 43         | 0            |
| 0.0002186  | -0.0004000 | 0.0000000 | 1314.3247500 | 1314.3245314 |
| 445: 42    | 1 41       | 1 43      | 1 42         | 0            |
| -0.0003961 | -0.0004000 | 0.0000000 | 1314.5731300 | 1314.5735261 |
| 446: 41    | 1 40       | 1 42      | 1 41         | 0            |
| -0.0004596 | -0.0004000 | 0.0000000 | 1314.8219000 | 1314.8223596 |
| 447: 40    | 1 39       | 1 41      | 1 40         | 0            |
| 0.0001633  | -0.0004000 | 0.0000000 | 1315.0712300 | 1315.0710667 |
| 448: 37    | 1 36       | 1 38      | 1 37         | 0            |
| -0.0000007 | -0.0004000 | 0.0000000 | 1315.8169000 | 1315.8169007 |
| 449: 34    | 1 33       | 1 35      | 1 34         | 0            |
| -0.0002845 | -0.0004000 | 0.0000000 | 1316.5633100 | 1316.5635945 |
| 450: 33    | 1 32       | 1 34      | 1 33         | 0            |
| 0.0004774  | -0.0004000 | 0.0000000 | 1316.8134900 | 1316.8130126 |
| 451: 32    | 1 31       | 1 33      | 1 32         | 0            |
| 0.0000199  | -0.0004000 | 0.0000000 | 1317.0628300 | 1317.0628101 |
| 452: 31    | 1 30       | 1 32      | 1 31         | 0            |
| 0.0000576  | -0.0004000 | 0.0000000 | 1317.3131100 | 1317.3130524 |

|            |            |           |      |   |              |              |
|------------|------------|-----------|------|---|--------------|--------------|
| 453: 30    | 1 29       | 1 31      | 1 30 | 0 | 1317.5638100 | 1317.5637973 |
| 0.0000127  | -0.0004000 | 0.0000000 |      |   |              |              |
| 454: 29    | 1 28       | 1 30      | 1 29 | 0 | 1317.8158000 | 1317.8150932 |
| 0.0007068  | -0.0004000 | 0.0000000 |      |   |              |              |
| 455: 27    | 1 26       | 1 28      | 1 27 | 0 | 1318.3199400 | 1318.3194779 |
| 0.0004621  | -0.0004000 | 0.0000000 |      |   |              |              |
| 456: 26    | 1 25       | 1 27      | 1 26 | 0 | 1318.5729600 | 1318.5726084 |
| 0.0003516  | -0.0004000 | 0.0000000 |      |   |              |              |
| 457: 25    | 1 24       | 1 26      | 1 25 | 0 | 1318.8263600 | 1318.8263743 |
| -0.0000143 | -0.0004000 | 0.0000000 |      |   |              |              |
| 458: 24    | 1 23       | 1 25      | 1 24 | 0 | 1319.0809900 | 1319.0807704 |
| 0.0002196  | -0.0004000 | 0.0000000 |      |   |              |              |
| 459: 21    | 1 20       | 1 22      | 1 21 | 0 | 1319.8474300 | 1319.8475737 |
| -0.0001437 | -0.0004000 | 0.0000000 |      |   |              |              |
| 460: 20    | 1 19       | 1 21      | 1 20 | 0 | 1320.1042100 | 1320.1042949 |
| -0.0000849 | -0.0004000 | 0.0000000 |      |   |              |              |
| 461: 19    | 1 18       | 1 20      | 1 19 | 0 | 1320.3614900 | 1320.3615240 |
| -0.0000340 | -0.0004000 | 0.0000000 |      |   |              |              |
| 462: 18    | 1 17       | 1 19      | 1 18 | 0 | 1320.6195700 | 1320.6192261 |
| 0.0003439  | -0.0004000 | 0.0000000 |      |   |              |              |
| 463: 17    | 1 16       | 1 18      | 1 17 | 0 | 1320.8776500 | 1320.8773656 |
| 0.0002844  | -0.0004000 | 0.0000000 |      |   |              |              |
| 464: 15    | 1 14       | 1 16      | 1 15 | 0 | 1321.3948300 | 1321.3948129 |
| 0.0000171  | -0.0004000 | 0.0000000 |      |   |              |              |
| 465: 14    | 1 13       | 1 15      | 1 14 | 0 | 1321.6540900 | 1321.6540501 |
| 0.0000399  | -0.0004000 | 0.0000000 |      |   |              |              |
| 466: 13    | 1 12       | 1 14      | 1 13 | 0 | 1321.9136400 | 1321.9135840 |
| 0.0000560  | -0.0004000 | 0.0000000 |      |   |              |              |
| 467: 11    | 1 10       | 1 12      | 1 11 | 0 | 1322.4333700 | 1322.4334124 |
| -0.0000424 | -0.0004000 | 0.0000000 |      |   |              |              |
| 468: 10    | 1 9        | 1 11      | 1 10 | 0 | 1322.6936200 | 1322.6936450 |
| -0.0000250 | -0.0004000 | 0.0000000 |      |   |              |              |
| 469: 9     | 1 8        | 1 10      | 1 9  | 0 | 1322.9541000 | 1322.9540508 |
| 0.0000492  | -0.0004000 | 0.0000000 |      |   |              |              |
| 470: 8     | 1 7        | 1 9       | 1 8  | 0 | 1323.2147700 | 1323.2146020 |
| 0.0001680  | -0.0004000 | 0.0000000 |      |   |              |              |
| 471: 7     | 1 6        | 1 8       | 1 7  | 0 | 1323.4748900 | 1323.4752720 |
| -0.0003820 | -0.0004000 | 0.0000000 |      |   |              |              |
| 472: 3     | 1 2        | 1 2       | 1 1  | 0 | 1326.3436800 | 1326.3435353 |
| 0.0001447  | -0.0004000 | 0.0000000 |      |   |              |              |
| 473: 4     | 1 3        | 1 3       | 1 2  | 0 | 1326.6036400 | 1326.6037572 |
| -0.0001172 | -0.0004000 | 0.0000000 |      |   |              |              |
| 474: 5     | 1 4        | 1 4       | 1 3  | 0 | 1326.8638200 | 1326.8637849 |
| 0.0000351  | -0.0004000 | 0.0000000 |      |   |              |              |
| 475: 6     | 1 5        | 1 5       | 1 4  | 0 | 1327.1238100 | 1327.1235909 |
| 0.0002191  | -0.0004000 | 0.0000000 |      |   |              |              |
| 476: 8     | 1 7        | 1 7       | 1 6  | 0 | 1327.6421700 | 1327.6424205 |
| -0.0002505 | -0.0004000 | 0.0000000 |      |   |              |              |
| 477: 9     | 1 8        | 1 8       | 1 7  | 0 | 1327.9017200 | 1327.9013811 |
| 0.0003389  | -0.0004000 | 0.0000000 |      |   |              |              |
| 478: 10    | 1 9        | 1 9       | 1 8  | 0 | 1328.1602100 | 1328.1599934 |
| 0.0002166  | -0.0004000 | 0.0000000 |      |   |              |              |
| 479: 11    | 1 10       | 1 10      | 1 9  | 0 | 1328.4185300 | 1328.4182202 |
| 0.0003098  | -0.0004000 | 0.0000000 |      |   |              |              |
| 480: 12    | 1 11       | 1 11      | 1 10 | 0 | 1328.6760400 | 1328.6760220 |
| 0.0000180  | -0.0004000 | 0.0000000 |      |   |              |              |
| 481: 13    | 1 12       | 1 12      | 1 11 | 0 | 1328.9335400 | 1328.9333559 |
| 0.0001841  | -0.0004000 | 0.0000000 |      |   |              |              |
| 482: 14    | 1 13       | 1 13      | 1 12 | 0 | 1329.1901200 | 1329.1901764 |
| -0.0000564 | -0.0004000 | 0.0000000 |      |   |              |              |
| 483: 15    | 1 14       | 1 14      | 1 13 | 0 | 1329.4465900 | 1329.4464345 |
| 0.0001555  | -0.0004000 | 0.0000000 |      |   |              |              |
| 484: 16    | 1 15       | 1 15      | 1 14 | 0 | 1329.7026600 | 1329.7020778 |
| 0.0005822  | -0.0004000 | 0.0000000 |      |   |              |              |
| 485: 17    | 1 16       | 1 16      | 1 15 | 0 | 1329.9571900 | 1329.9570506 |



|            |            |           |              |              |
|------------|------------|-----------|--------------|--------------|
| 0.0001394  | -0.0004000 | 0.0000000 |              |              |
| 486: 18    | 1 17       | 1 17      | 1 16         | 0            |
| -0.0002039 | -0.0004000 | 0.0000000 | 1330.2110900 | 1330.2112939 |
| 487: 19    | 1 18       | 1 18      | 1 17         | 0            |
| -0.0001254 | -0.0004000 | 0.0000000 | 1330.4646200 | 1330.4647454 |
| 488: 20    | 1 19       | 1 19      | 1 18         | 0            |
| -0.0004003 | -0.0004000 | 0.0000000 | 1330.7169400 | 1330.7173403 |
| 489: 22    | 1 21       | 1 21      | 1 20         | 0            |
| 0.0000284  | -0.0004000 | 0.0000000 | 1331.2197200 | 1331.2196916 |
| 490: 23    | 1 22       | 1 22      | 1 21         | 0            |
| 0.0003080  | -0.0004000 | 0.0000000 | 1331.4696200 | 1331.4693120 |
| 491: 24    | 1 23       | 1 23      | 1 22         | 0            |
| 0.0000332  | -0.0004000 | 0.0000000 | 1331.7178400 | 1331.7178068 |
| 492: 25    | 1 24       | 1 24      | 1 23         | 0            |
| -0.0002032 | -0.0004000 | 0.0000000 | 1331.9649100 | 1331.9651132 |
| 493: 26    | 1 25       | 1 25      | 1 24         | 0            |
| 0.0001655  | -0.0004000 | 0.0000000 | 1332.2113400 | 1332.2111745 |
| 494: 27    | 1 26       | 1 26      | 1 25         | 0            |
| 0.0000776  | -0.0004000 | 0.0000000 | 1332.4560200 | 1332.4559424 |
| 495: 28    | 1 27       | 1 27      | 1 26         | 0            |
| -0.0003893 | -0.0004000 | 0.0000000 | 1332.6989900 | 1332.6993793 |
| 496: 29    | 1 28       | 1 28      | 1 27         | 0            |
| 0.0000286  | -0.0004000 | 0.0000000 | 1332.9414900 | 1332.9414614 |
| 497: 30    | 1 29       | 1 29      | 1 28         | 0            |
| -0.0000909 | -0.0004000 | 0.0000000 | 1333.1820900 | 1333.1821809 |
| 498: 31    | 1 30       | 1 30      | 1 29         | 0            |
| 0.0001423  | -0.0004000 | 0.0000000 | 1333.4216900 | 1333.4215477 |
| 499: 32    | 1 31       | 1 31      | 1 30         | 0            |
| 0.0002395  | -0.0004000 | 0.0000000 | 1333.6598300 | 1333.6595905 |
| 500: 33    | 1 32       | 1 32      | 1 31         | 0            |
| -0.0001372 | -0.0004000 | 0.0000000 | 1333.8962200 | 1333.8963572 |
| 501: 34    | 1 33       | 1 33      | 1 32         | 0            |
| 0.0006665  | -0.0004000 | 0.0000000 | 1334.1325800 | 1334.1319135 |
| 502: 35    | 1 34       | 1 34      | 1 33         | 0            |
| 0.0001086  | -0.0004000 | 0.0000000 | 1334.3664500 | 1334.3663414 |
| 503: 36    | 1 35       | 1 35      | 1 34         | 0            |
| -0.0000655 | -0.0004000 | 0.0000000 | 1334.5996700 | 1334.5997355 |
| 504: 37    | 1 36       | 1 36      | 1 35         | 0            |
| 0.0002402  | -0.0004000 | 0.0000000 | 1334.8324400 | 1334.8321998 |
| 505: 38    | 1 37       | 1 37      | 1 36         | 0            |
| -0.0003129 | -0.0004000 | 0.0000000 | 1335.0635300 | 1335.0638429 |
| 506: 39    | 1 38       | 1 38      | 1 37         | 0            |
| 0.0000359  | -0.0004000 | 0.0000000 | 1335.2948100 | 1335.2947741 |
| 507: 40    | 1 39       | 1 39      | 1 38         | 0            |
| 0.0004208  | -0.0004000 | 0.0000000 | 1335.5255200 | 1335.5250992 |
| 508: 41    | 1 40       | 1 40      | 1 39         | 0            |
| 0.0002029  | -0.0004000 | 0.0000000 | 1335.7551200 | 1335.7549171 |
| 509: 42    | 1 41       | 1 41      | 1 40         | 0            |
| 0.0002426  | -0.0004000 | 0.0000000 | 1335.9845600 | 1335.9843174 |
| 510: 43    | 1 42       | 1 42      | 1 41         | 0            |
| -0.0000584 | -0.0004000 | 0.0000000 | 1336.2133200 | 1336.2133784 |
| 511: 44    | 1 43       | 1 43      | 1 42         | 0            |
| 0.0003637  | -0.0004000 | 0.0000000 | 1336.4425300 | 1336.4421663 |
| 512: 45    | 1 44       | 1 44      | 1 43         | 0            |
| -0.0003452 | -0.0004000 | 0.0000000 | 1336.6703900 | 1336.6707352 |
| 513: 46    | 1 45       | 1 45      | 1 44         | 0            |
| -0.0003575 | -0.0004000 | 0.0000000 | 1336.8987700 | 1336.8991275 |
| 514: 47    | 1 46       | 1 46      | 1 45         | 0            |
| 0.0003154  | -0.0004000 | 0.0000000 | 1337.1276900 | 1337.1273746 |
| 515: 48    | 1 47       | 1 47      | 1 46         | 0            |
| 0.0001313  | -0.0004000 | 0.0000000 | 1337.3556300 | 1337.3554987 |
| 516: 49    | 1 48       | 1 48      | 1 47         | 0            |
| -0.0000436 | -0.0004000 | 0.0000000 | 1337.5834700 | 1337.5835136 |
| 517: 50    | 1 49       | 1 49      | 1 48         | 0            |
| 0.0001040  | -0.0004000 | 0.0000000 | 1337.8115300 | 1337.8114260 |

|            |            |           |      |   |              |              |
|------------|------------|-----------|------|---|--------------|--------------|
| 518: 51    | 1 50       | 1 50      | 1 49 | 0 | 1338.0396400 | 1338.0392376 |
| 0.0004024  | -0.0004000 | 0.0000000 |      |   |              |              |
| 519: 52    | 1 51       | 1 51      | 1 50 | 0 | 1338.2670300 | 1338.2669451 |
| 0.0000849  | -0.0004000 | 0.0000000 |      |   |              |              |
| 520: 53    | 1 52       | 1 52      | 1 51 | 0 | 1338.4946900 | 1338.4945425 |
| 0.0001475  | -0.0004000 | 0.0000000 |      |   |              |              |
| 521: 54    | 1 53       | 1 53      | 1 52 | 0 | 1338.7222700 | 1338.7220211 |
| 0.0002489  | -0.0004000 | 0.0000000 |      |   |              |              |
| 522: 55    | 1 54       | 1 54      | 1 53 | 0 | 1338.9493500 | 1338.9493705 |
| -0.0000205 | -0.0004000 | 0.0000000 |      |   |              |              |
| 523: 56    | 1 55       | 1 55      | 1 54 | 0 | 1339.1766300 | 1339.1765795 |
| 0.0000505  | -0.0004000 | 0.0000000 |      |   |              |              |
| 524: 57    | 1 56       | 1 56      | 1 55 | 0 | 1339.4036800 | 1339.4036362 |
| 0.0000438  | -0.0004000 | 0.0000000 |      |   |              |              |
| 525: 58    | 1 57       | 1 57      | 1 56 | 0 | 1339.6300500 | 1339.6305286 |
| -0.0004786 | -0.0004000 | 0.0000000 |      |   |              |              |
| 526: 59    | 1 58       | 1 58      | 1 57 | 0 | 1339.8575700 | 1339.8572447 |
| 0.0003253  | -0.0004000 | 0.0000000 |      |   |              |              |
| 527: 60    | 1 59       | 1 59      | 1 58 | 0 | 1340.0838700 | 1340.0837730 |
| 0.0000970  | -0.0004000 | 0.0000000 |      |   |              |              |
| 528: 61    | 1 60       | 1 60      | 1 59 | 0 | 1340.3100900 | 1340.3101023 |
| -0.0000123 | -0.0004000 | 0.0000000 |      |   |              |              |
| 529: 65    | 1 64       | 1 64      | 1 63 | 0 | 1341.2129900 | 1341.2132266 |
| -0.0002366 | -0.0004000 | 0.0000000 |      |   |              |              |
| 530: 66    | 1 65       | 1 65      | 1 64 | 0 | 1341.4386800 | 1341.4384143 |
| 0.0002657  | -0.0004000 | 0.0000000 |      |   |              |              |
| 531: 67    | 1 66       | 1 66      | 1 65 | 0 | 1341.6637600 | 1341.6633486 |
| 0.0004114  | -0.0004000 | 0.0000000 |      |   |              |              |
| 532: 68    | 1 67       | 1 67      | 1 66 | 0 | 1341.8880200 | 1341.8880226 |
| -0.0000026 | -0.0004000 | 0.0000000 |      |   |              |              |
| 533: 75    | 1 74       | 1 74      | 1 73 | 0 | 1343.4527700 | 1343.4529708 |
| -0.0002008 | -0.0004000 | 0.0000000 |      |   |              |              |
| 534: 76    | 1 75       | 1 75      | 1 74 | 0 | 1343.6753700 | 1343.6753680 |
| 0.0000020  | -0.0004000 | 0.0000000 |      |   |              |              |
| 535: 78    | 1 77       | 1 77      | 1 76 | 0 | 1344.1189300 | 1344.1192487 |
| -0.0003187 | -0.0004000 | 0.0000000 |      |   |              |              |
| 536: 79    | 1 78       | 1 78      | 1 77 | 0 | 1344.3404400 | 1344.3407259 |
| -0.0002859 | -0.0004000 | 0.0000000 |      |   |              |              |
| 537: 80    | 1 79       | 1 79      | 1 78 | 0 | 1344.5613400 | 1344.5618903 |
| -0.0005503 | -0.0004000 | 0.0000000 |      |   |              |              |
| 538: 81    | 1 80       | 1 80      | 1 79 | 0 | 1344.7824600 | 1344.7827392 |
| -0.0002792 | -0.0004000 | 0.0000000 |      |   |              |              |
| 539: 82    | 1 81       | 1 81      | 1 80 | 0 | 1345.0034600 | 1345.0032701 |
| 0.0001899  | -0.0004000 | 0.0000000 |      |   |              |              |
| 540: 84    | 1 83       | 1 83      | 1 82 | 0 | 1345.4433700 | 1345.4433679 |
| 0.0000021  | -0.0004000 | 0.0000000 |      |   |              |              |
| 541: 85    | 1 84       | 1 84      | 1 83 | 0 | 1345.6630100 | 1345.6629301 |
| 0.0000799  | -0.0004000 | 0.0000000 |      |   |              |              |
| 542: 86    | 1 85       | 1 85      | 1 84 | 0 | 1345.8819400 | 1345.8821649 |
| -0.0002249 | -0.0004000 | 0.0000000 |      |   |              |              |
| 543: 87    | 1 86       | 1 86      | 1 85 | 0 | 1346.1010800 | 1346.1010702 |
| 0.0000098  | -0.0004000 | 0.0000000 |      |   |              |              |
| 544: 88    | 1 87       | 1 87      | 1 86 | 0 | 1346.3192600 | 1346.3196440 |
| -0.0003840 | -0.0004000 | 0.0000000 |      |   |              |              |
| 545: 89    | 1 88       | 1 88      | 1 87 | 0 | 1346.5374900 | 1346.5378842 |
| -0.0003942 | -0.0004000 | 0.0000000 |      |   |              |              |
| 546: 94    | 1 94       | 1 95      | 1 95 | 0 | 1301.6615600 | 1301.6612430 |
| 0.0003170  | -0.0004000 | 0.0000000 |      |   |              |              |
| 547: 92    | 1 92       | 1 93      | 1 93 | 0 | 1302.1722300 | 1302.1727772 |
| -0.0005472 | -0.0004000 | 0.0000000 |      |   |              |              |
| 548: 91    | 1 91       | 1 92      | 1 92 | 0 | 1302.4281100 | 1302.4284338 |
| -0.0003238 | -0.0004000 | 0.0000000 |      |   |              |              |
| 549: 90    | 1 90       | 1 91      | 1 91 | 0 | 1302.6838200 | 1302.6840151 |
| -0.0001951 | -0.0004000 | 0.0000000 |      |   |              |              |
| 550: 89    | 1 89       | 1 90      | 1 90 | 0 | 1302.9406800 | 1302.9395197 |

|            |            |           |              |              |
|------------|------------|-----------|--------------|--------------|
| 0.0011603  | -0.0004000 | 0.0000000 |              |              |
| 551: 88    | 1 88       | 1 89      | 1 89         | 0            |
| 0.0006735  | -0.0004000 | 0.0000000 | 1303.1956200 | 1303.1949465 |
| 552: 87    | 1 87       | 1 88      | 1 88         | 0            |
| -0.0004840 | -0.0004000 | 0.0000000 | 1303.4498100 | 1303.4502940 |
| 553: 86    | 1 86       | 1 87      | 1 87         | 0            |
| -0.0006110 | -0.0004000 | 0.0000000 | 1303.7049500 | 1303.7055610 |
| 554: 84    | 1 84       | 1 85      | 1 85         | 0            |
| 0.0004318  | -0.0004000 | 0.0000000 | 1304.2162800 | 1304.2158482 |
| 555: 83    | 1 83       | 1 84      | 1 84         | 0            |
| 0.0004242  | -0.0004000 | 0.0000000 | 1304.4712900 | 1304.4708658 |
| 556: 81    | 1 81       | 1 82      | 1 82         | 0            |
| -0.0000226 | -0.0004000 | 0.0000000 | 1304.9806200 | 1304.9806426 |
| 557: 80    | 1 80       | 1 81      | 1 81         | 0            |
| -0.0000591 | -0.0004000 | 0.0000000 | 1305.2353400 | 1305.2353991 |
| 558: 78    | 1 78       | 1 79      | 1 79         | 0            |
| 0.0000883  | -0.0004000 | 0.0000000 | 1305.7447300 | 1305.7446417 |
| 559: 77    | 1 77       | 1 78      | 1 78         | 0            |
| 0.0005948  | -0.0004000 | 0.0000000 | 1305.9997200 | 1305.9991252 |
| 560: 76    | 1 76       | 1 77      | 1 77         | 0            |
| 0.0000049  | -0.0004000 | 0.0000000 | 1306.2535200 | 1306.2535151 |
| 561: 75    | 1 75       | 1 76      | 1 76         | 0            |
| -0.0002201 | -0.0004000 | 0.0000000 | 1306.5075900 | 1306.5078101 |
| 562: 74    | 1 74       | 1 75      | 1 75         | 0            |
| -0.0002988 | -0.0004000 | 0.0000000 | 1306.7617100 | 1306.7620088 |
| 563: 73    | 1 73       | 1 74      | 1 74         | 0            |
| -0.0001599 | -0.0004000 | 0.0000000 | 1307.0159500 | 1307.0161099 |
| 564: 72    | 1 72       | 1 73      | 1 73         | 0            |
| 0.0002179  | -0.0004000 | 0.0000000 | 1307.2703300 | 1307.2701121 |
| 565: 71    | 1 71       | 1 72      | 1 72         | 0            |
| -0.0001141 | -0.0004000 | 0.0000000 | 1307.5239000 | 1307.5240141 |
| 566: 70    | 1 70       | 1 71      | 1 71         | 0            |
| -0.0001846 | -0.0004000 | 0.0000000 | 1307.7776300 | 1307.7778146 |
| 567: 69    | 1 69       | 1 70      | 1 70         | 0            |
| 0.0001078  | -0.0004000 | 0.0000000 | 1308.0316200 | 1308.0315122 |
| 568: 68    | 1 68       | 1 69      | 1 69         | 0            |
| 0.0001843  | -0.0004000 | 0.0000000 | 1308.2852900 | 1308.2851057 |
| 569: 67    | 1 67       | 1 68      | 1 68         | 0            |
| -0.0000637 | -0.0004000 | 0.0000000 | 1308.5385300 | 1308.5385937 |
| 570: 66    | 1 66       | 1 67      | 1 67         | 0            |
| 0.0000251  | -0.0004000 | 0.0000000 | 1308.7920000 | 1308.7919749 |
| 571: 65    | 1 65       | 1 66      | 1 66         | 0            |
| -0.0000682 | -0.0004000 | 0.0000000 | 1309.0451800 | 1309.0452482 |
| 572: 64    | 1 64       | 1 65      | 1 65         | 0            |
| -0.0001421 | -0.0004000 | 0.0000000 | 1309.2982700 | 1309.2984121 |
| 573: 63    | 1 63       | 1 64      | 1 64         | 0            |
| -0.0001454 | -0.0004000 | 0.0000000 | 1309.5513200 | 1309.5514654 |
| 574: 62    | 1 62       | 1 63      | 1 63         | 0            |
| 0.0003531  | -0.0004000 | 0.0000000 | 1309.8047600 | 1309.8044069 |
| 575: 61    | 1 61       | 1 62      | 1 62         | 0            |
| -0.0001254 | -0.0004000 | 0.0000000 | 1310.0571100 | 1310.0572354 |
| 576: 60    | 1 60       | 1 61      | 1 61         | 0            |
| -0.0002796 | -0.0004000 | 0.0000000 | 1310.3096700 | 1310.3099496 |
| 577: 59    | 1 59       | 1 60      | 1 60         | 0            |
| -0.0002184 | -0.0004000 | 0.0000000 | 1310.5623300 | 1310.5625484 |
| 578: 58    | 1 58       | 1 59      | 1 59         | 0            |
| -0.0001506 | -0.0004000 | 0.0000000 | 1310.8148800 | 1310.8150306 |
| 579: 57    | 1 57       | 1 58      | 1 58         | 0            |
| -0.0001852 | -0.0004000 | 0.0000000 | 1311.0672100 | 1311.0673952 |
| 580: 56    | 1 56       | 1 57      | 1 57         | 0            |
| -0.0004110 | -0.0004000 | 0.0000000 | 1311.3192300 | 1311.3196410 |
| 581: 55    | 1 55       | 1 56      | 1 56         | 0            |
| -0.0002472 | -0.0004000 | 0.0000000 | 1311.5715200 | 1311.5717672 |
| 582: 54    | 1 54       | 1 55      | 1 55         | 0            |
| -0.0002826 | -0.0004000 | 0.0000000 | 1311.8234900 | 1311.8237726 |

|            |            |           |      |   |              |              |
|------------|------------|-----------|------|---|--------------|--------------|
| 583: 53    | 1 53       | 1 54      | 1 54 | 0 | 1312.0752900 | 1312.0756566 |
| -0.0003666 | -0.0004000 | 0.0000000 |      |   |              |              |
| 584: 52    | 1 52       | 1 53      | 1 53 | 0 | 1312.3263900 | 1312.3274182 |
| -0.0010282 | -0.0004000 | 0.0000000 |      |   |              |              |
| 585: 51    | 1 51       | 1 52      | 1 52 | 0 | 1312.5786600 | 1312.5790569 |
| -0.0003969 | -0.0004000 | 0.0000000 |      |   |              |              |
| 586: 50    | 1 50       | 1 51      | 1 51 | 0 | 1312.8300600 | 1312.8305720 |
| -0.0005120 | -0.0004000 | 0.0000000 |      |   |              |              |
| 587: 49    | 1 49       | 1 50      | 1 50 | 0 | 1313.0815700 | 1313.0819632 |
| -0.0003932 | -0.0004000 | 0.0000000 |      |   |              |              |
| 588: 47    | 1 47       | 1 48      | 1 48 | 0 | 1313.5837000 | 1313.5843729 |
| -0.0006729 | -0.0004000 | 0.0000000 |      |   |              |              |
| 589: 46    | 1 46       | 1 47      | 1 47 | 0 | 1313.8348300 | 1313.8353913 |
| -0.0005613 | -0.0004000 | 0.0000000 |      |   |              |              |
| 590: 45    | 1 45       | 1 46      | 1 46 | 0 | 1314.0855300 | 1314.0862858 |
| -0.0007558 | -0.0004000 | 0.0000000 |      |   |              |              |
| 591: 39    | 1 39       | 1 40      | 1 40 | 0 | 1315.5888300 | 1315.5891048 |
| -0.0002748 | -0.0004000 | 0.0000000 |      |   |              |              |
| 592: 38    | 1 38       | 1 39      | 1 39 | 0 | 1315.8386200 | 1315.8391661 |
| -0.0005461 | -0.0004000 | 0.0000000 |      |   |              |              |
| 593: 36    | 1 36       | 1 37      | 1 37 | 0 | 1316.3386500 | 1316.3389638 |
| -0.0003138 | -0.0004000 | 0.0000000 |      |   |              |              |
| 594: 35    | 1 35       | 1 36      | 1 36 | 0 | 1316.5886200 | 1316.5887082 |
| -0.0000882 | -0.0004000 | 0.0000000 |      |   |              |              |
| 595: 34    | 1 34       | 1 35      | 1 35 | 0 | 1316.8381800 | 1316.8383559 |
| -0.0001759 | -0.0004000 | 0.0000000 |      |   |              |              |
| 596: 33    | 1 33       | 1 34      | 1 34 | 0 | 1317.0874000 | 1317.0879123 |
| -0.0005123 | -0.0004000 | 0.0000000 |      |   |              |              |
| 597: 31    | 1 31       | 1 32      | 1 32 | 0 | 1317.5860400 | 1317.5867760 |
| -0.0007360 | -0.0004000 | 0.0000000 |      |   |              |              |
| 598: 30    | 1 30       | 1 31      | 1 31 | 0 | 1317.8358100 | 1317.8360970 |
| -0.0002870 | -0.0004000 | 0.0000000 |      |   |              |              |
| 599: 29    | 1 29       | 1 30      | 1 30 | 0 | 1318.0853100 | 1318.0853542 |
| -0.0000442 | -0.0004000 | 0.0000000 |      |   |              |              |
| 600: 27    | 1 27       | 1 28      | 1 28 | 0 | 1318.5841200 | 1318.5837100 |
| 0.0004100  | -0.0004000 | 0.0000000 |      |   |              |              |
| 601: 26    | 1 26       | 1 27      | 1 27 | 0 | 1318.8331400 | 1318.8328260 |
| 0.0003140  | -0.0004000 | 0.0000000 |      |   |              |              |
| 602: 25    | 1 25       | 1 26      | 1 26 | 0 | 1319.0818900 | 1319.0819128 |
| -0.0000228 | -0.0004000 | 0.0000000 |      |   |              |              |
| 603: 24    | 1 24       | 1 25      | 1 25 | 0 | 1319.3311200 | 1319.3309796 |
| 0.0001404  | -0.0004000 | 0.0000000 |      |   |              |              |
| 604: 23    | 1 23       | 1 24      | 1 24 | 0 | 1319.5803800 | 1319.5800355 |
| 0.0003445  | -0.0004000 | 0.0000000 |      |   |              |              |
| 605: 22    | 1 22       | 1 23      | 1 23 | 0 | 1319.8291100 | 1319.8290895 |
| 0.0000205  | -0.0004000 | 0.0000000 |      |   |              |              |
| 606: 20    | 1 20       | 1 21      | 1 21 | 0 | 1320.3269000 | 1320.3272254 |
| -0.0003254 | -0.0004000 | 0.0000000 |      |   |              |              |
| 607: 19    | 1 19       | 1 20      | 1 20 | 0 | 1320.5764600 | 1320.5763226 |
| 0.0001374  | -0.0004000 | 0.0000000 |      |   |              |              |
| 608: 18    | 1 18       | 1 19      | 1 19 | 0 | 1320.8253100 | 1320.8254484 |
| -0.0001384 | -0.0004000 | 0.0000000 |      |   |              |              |
| 609: 17    | 1 17       | 1 18      | 1 18 | 0 | 1321.0749400 | 1321.0746078 |
| 0.0003322  | -0.0004000 | 0.0000000 |      |   |              |              |
| 610: 16    | 1 16       | 1 17      | 1 17 | 0 | 1321.3239700 | 1321.3238052 |
| 0.0001648  | -0.0004000 | 0.0000000 |      |   |              |              |
| 611: 15    | 1 15       | 1 16      | 1 16 | 0 | 1321.5729400 | 1321.5730432 |
| -0.0001032 | -0.0004000 | 0.0000000 |      |   |              |              |
| 612: 13    | 1 13       | 1 14      | 1 14 | 0 | 1322.0717400 | 1322.0716438 |
| 0.0000962  | -0.0004000 | 0.0000000 |      |   |              |              |
| 613: 11    | 1 11       | 1 12      | 1 12 | 0 | 1322.5703800 | 1322.5703989 |
| -0.0000189 | -0.0004000 | 0.0000000 |      |   |              |              |
| 614: 10    | 1 10       | 1 11      | 1 11 | 0 | 1322.8196400 | 1322.8198230 |
| -0.0001830 | -0.0004000 | 0.0000000 |      |   |              |              |
| 615: 9     | 1 9        | 1 10      | 1 10 | 0 | 1323.0693000 | 1323.0692686 |

|            |            |           |              |              |
|------------|------------|-----------|--------------|--------------|
| 0.0000314  | -0.0004000 | 0.0000000 |              |              |
| 616:       | 8          | 1         | 8            | 1            |
|            | 9          | 1         | 9            | 0            |
| -0.0000959 | -0.0004000 | 0.0000000 | 1323.3186300 | 1323.3187259 |
| 617:       | 7          | 1         | 7            | 1            |
|            | 8          | 1         | 8            | 0            |
| -0.0005237 | -0.0004000 | 0.0000000 | 1323.5676600 | 1323.5681837 |
| 618:       | 6          | 1         | 6            | 1            |
|            | 7          | 1         | 7            | 0            |
| 0.0001714  | -0.0004000 | 0.0000000 | 1323.8178000 | 1323.8176286 |
| 619:       | 5          | 1         | 5            | 1            |
|            | 6          | 1         | 6            | 0            |
| -0.0000960 | -0.0004000 | 0.0000000 | 1324.0669500 | 1324.0670460 |
| 620:       | 4          | 1         | 4            | 1            |
|            | 5          | 1         | 5            | 0            |
| 0.0002706  | -0.0004000 | 0.0000000 | 1324.3166900 | 1324.3164194 |
| 621:       | 3          | 1         | 3            | 1            |
|            | 4          | 1         | 4            | 0            |
| -0.0002010 | -0.0004000 | 0.0000000 | 1324.5655300 | 1324.5657310 |
| 622:       | 2          | 1         | 2            | 1            |
|            | 3          | 1         | 3            | 0            |
| 0.0001584  | -0.0004000 | 0.0000000 | 1324.8151200 | 1324.8149616 |
| 623:       | 3          | 1         | 3            | 1            |
|            | 2          | 1         | 2            | 0            |
| -0.0001621 | -0.0004000 | 0.0000000 | 1326.3072900 | 1326.3074521 |
| 624:       | 4          | 1         | 4            | 1            |
|            | 3          | 1         | 3            | 0            |
| -0.0002260 | -0.0004000 | 0.0000000 | 1326.5552800 | 1326.5555060 |
| 625:       | 5          | 1         | 5            | 1            |
|            | 4          | 1         | 4            | 0            |
| 0.0002405  | -0.0004000 | 0.0000000 | 1326.8035400 | 1326.8032995 |
| 626:       | 6          | 1         | 6            | 1            |
|            | 5          | 1         | 5            | 0            |
| 0.0005403  | -0.0004000 | 0.0000000 | 1327.0513500 | 1327.0508097 |
| 627:       | 7          | 1         | 7            | 1            |
|            | 6          | 1         | 6            | 0            |
| 0.0000858  | -0.0004000 | 0.0000000 | 1327.2981000 | 1327.2980142 |
| 628:       | 8          | 1         | 8            | 1            |
|            | 7          | 1         | 7            | 0            |
| 0.0000185  | -0.0004000 | 0.0000000 | 1327.5449100 | 1327.5448915 |
| 629:       | 9          | 1         | 9            | 1            |
|            | 8          | 1         | 8            | 0            |
| 0.0002088  | -0.0004000 | 0.0000000 | 1327.7916300 | 1327.7914212 |
| 630:       | 10         | 1         | 10           | 1            |
|            | 9          | 1         | 9            | 0            |
| -0.0002239 | -0.0004000 | 0.0000000 | 1328.0373600 | 1328.0375839 |
| 631:       | 11         | 1         | 11           | 1            |
|            | 10         | 1         | 10           | 0            |
| -0.0004116 | -0.0004000 | 0.0000000 | 1328.2829500 | 1328.2833616 |
| 632:       | 12         | 1         | 12           | 1            |
|            | 11         | 1         | 11           | 0            |
| -0.0001180 | -0.0004000 | 0.0000000 | 1328.5286200 | 1328.5287380 |
| 633:       | 13         | 1         | 13           | 1            |
|            | 12         | 1         | 12           | 0            |
| 0.0000516  | -0.0004000 | 0.0000000 | 1328.7737500 | 1328.7736984 |
| 634:       | 14         | 1         | 14           | 1            |
|            | 13         | 1         | 13           | 0            |
| 0.0003101  | -0.0004000 | 0.0000000 | 1329.0185400 | 1329.0182299 |
| 635:       | 15         | 1         | 15           | 1            |
|            | 14         | 1         | 14           | 0            |
| 0.0001285  | -0.0004000 | 0.0000000 | 1329.2624500 | 1329.2623215 |
| 636:       | 16         | 1         | 16           | 1            |
|            | 15         | 1         | 15           | 0            |
| 0.0001659  | -0.0004000 | 0.0000000 | 1329.5061300 | 1329.5059641 |
| 637:       | 17         | 1         | 17           | 1            |
|            | 16         | 1         | 16           | 0            |
| -0.0003809 | -0.0004000 | 0.0000000 | 1329.7487700 | 1329.7491509 |
| 638:       | 19         | 1         | 19           | 1            |
|            | 18         | 1         | 18           | 0            |
| -0.0002990 | -0.0004000 | 0.0000000 | 1330.2338400 | 1330.2341390 |
| 639:       | 21         | 1         | 21           | 1            |
|            | 20         | 1         | 20           | 0            |
| -0.0003793 | -0.0004000 | 0.0000000 | 1330.7168900 | 1330.7172693 |
| 640:       | 22         | 1         | 22           | 1            |
|            | 21         | 1         | 21           | 0            |
| -0.0001806 | -0.0004000 | 0.0000000 | 1330.9579600 | 1330.9581406 |
| 641:       | 23         | 1         | 23           | 1            |
|            | 22         | 1         | 22           | 0            |
| -0.0001642 | -0.0004000 | 0.0000000 | 1331.1983900 | 1331.1985542 |
| 642:       | 24         | 1         | 24           | 1            |
|            | 23         | 1         | 23           | 0            |
| -0.0001454 | -0.0004000 | 0.0000000 | 1331.4383700 | 1331.4385154 |
| 643:       | 25         | 1         | 25           | 1            |
|            | 24         | 1         | 24           | 0            |
| -0.0002506 | -0.0004000 | 0.0000000 | 1331.6777800 | 1331.6780306 |
| 644:       | 26         | 1         | 26           | 1            |
|            | 25         | 1         | 25           | 0            |
| -0.0003973 | -0.0004000 | 0.0000000 | 1331.9167100 | 1331.9171073 |
| 645:       | 27         | 1         | 27           | 1            |
|            | 26         | 1         | 26           | 0            |
| -0.0002938 | -0.0004000 | 0.0000000 | 1332.1554600 | 1332.1557538 |
| 646:       | 28         | 1         | 28           | 1            |
|            | 27         | 1         | 27           | 0            |
| -0.0000289 | -0.0004000 | 0.0000000 | 1332.3939500 | 1332.3939789 |
| 647:       | 29         | 1         | 29           | 1            |
|            | 28         | 1         | 28           | 0            |
| -0.0000219 | -0.0004000 | 0.0000000 | 1332.6317700 | 1332.6317919 |

|            |            |           |      |   |              |              |
|------------|------------|-----------|------|---|--------------|--------------|
| 648: 30    | 1 30       | 1 29      | 1 29 | 0 | 1332.8690300 | 1332.8692021 |
| -0.0001721 | -0.0004000 | 0.0000000 |      |   |              |              |
| 649: 31    | 1 31       | 1 30      | 1 30 | 0 | 1333.1064000 | 1333.1062191 |
| 0.0001809  | -0.0004000 | 0.0000000 |      |   |              |              |
| 650: 32    | 1 32       | 1 31      | 1 31 | 0 | 1333.3430900 | 1333.3428522 |
| 0.0002378  | -0.0004000 | 0.0000000 |      |   |              |              |
| 651: 33    | 1 33       | 1 32      | 1 32 | 0 | 1333.5786900 | 1333.5791107 |
| -0.0004207 | -0.0004000 | 0.0000000 |      |   |              |              |
| 652: 34    | 1 34       | 1 33      | 1 33 | 0 | 1333.8151500 | 1333.8150034 |
| 0.0001466  | -0.0004000 | 0.0000000 |      |   |              |              |
| 653: 35    | 1 35       | 1 34      | 1 34 | 0 | 1334.0499900 | 1334.0505387 |
| -0.0005487 | -0.0004000 | 0.0000000 |      |   |              |              |
| 654: 37    | 1 37       | 1 36      | 1 36 | 0 | 1334.5205700 | 1334.5205687 |
| 0.0000013  | -0.0004000 | 0.0000000 |      |   |              |              |
| 655: 38    | 1 38       | 1 37      | 1 37 | 0 | 1334.7550100 | 1334.7550777 |
| -0.0000677 | -0.0004000 | 0.0000000 |      |   |              |              |
| 656: 39    | 1 39       | 1 38      | 1 38 | 0 | 1334.9887100 | 1334.9892580 |
| -0.0005480 | -0.0004000 | 0.0000000 |      |   |              |              |
| 657: 40    | 1 40       | 1 39      | 1 39 | 0 | 1335.2233300 | 1335.2231153 |
| 0.0002147  | -0.0004000 | 0.0000000 |      |   |              |              |
| 658: 41    | 1 41       | 1 40      | 1 40 | 0 | 1335.4567400 | 1335.4566548 |
| 0.0000852  | -0.0004000 | 0.0000000 |      |   |              |              |
| 659: 42    | 1 42       | 1 41      | 1 41 | 0 | 1335.6897700 | 1335.6898809 |
| -0.0001109 | -0.0004000 | 0.0000000 |      |   |              |              |
| 660: 43    | 1 43       | 1 42      | 1 42 | 0 | 1335.9228600 | 1335.9227978 |
| 0.0000622  | -0.0004000 | 0.0000000 |      |   |              |              |
| 661: 44    | 1 44       | 1 43      | 1 43 | 0 | 1336.1551200 | 1336.1554089 |
| -0.0002889 | -0.0004000 | 0.0000000 |      |   |              |              |
| 662: 45    | 1 45       | 1 44      | 1 44 | 0 | 1336.3879100 | 1336.3877173 |
| 0.0001927  | -0.0004000 | 0.0000000 |      |   |              |              |
| 663: 52    | 1 52       | 1 51      | 1 51 | 0 | 1338.0061800 | 1338.0055642 |
| 0.0006158  | -0.0004000 | 0.0000000 |      |   |              |              |
| 664: 53    | 1 53       | 1 52      | 1 52 | 0 | 1338.2359500 | 1338.2355107 |
| 0.0004393  | -0.0004000 | 0.0000000 |      |   |              |              |
| 665: 54    | 1 54       | 1 53      | 1 53 | 0 | 1338.4656700 | 1338.4651648 |
| 0.0005052  | -0.0004000 | 0.0000000 |      |   |              |              |
| 666: 55    | 1 55       | 1 54      | 1 54 | 0 | 1338.6948500 | 1338.6945261 |
| 0.0003239  | -0.0004000 | 0.0000000 |      |   |              |              |
| 667: 56    | 1 56       | 1 55      | 1 55 | 0 | 1338.9239800 | 1338.9235945 |
| 0.0003855  | -0.0004000 | 0.0000000 |      |   |              |              |
| 668: 57    | 1 57       | 1 56      | 1 56 | 0 | 1339.1529000 | 1339.1523694 |
| 0.0005306  | -0.0004000 | 0.0000000 |      |   |              |              |
| 669: 58    | 1 58       | 1 57      | 1 57 | 0 | 1339.3810000 | 1339.3808501 |
| 0.0001499  | -0.0004000 | 0.0000000 |      |   |              |              |
| 670: 59    | 1 59       | 1 58      | 1 58 | 0 | 1339.6092600 | 1339.6090359 |
| 0.0002241  | -0.0004000 | 0.0000000 |      |   |              |              |
| 671: 60    | 1 60       | 1 59      | 1 59 | 0 | 1339.8370500 | 1339.8369259 |
| 0.0001241  | -0.0004000 | 0.0000000 |      |   |              |              |
| 672: 61    | 1 61       | 1 60      | 1 60 | 0 | 1340.0648600 | 1340.0645192 |
| 0.0003408  | -0.0004000 | 0.0000000 |      |   |              |              |
| 673: 62    | 1 62       | 1 61      | 1 61 | 0 | 1340.2920400 | 1340.2918148 |
| 0.0002252  | -0.0004000 | 0.0000000 |      |   |              |              |
| 674: 63    | 1 63       | 1 62      | 1 62 | 0 | 1340.5191800 | 1340.5188115 |
| 0.0003685  | -0.0004000 | 0.0000000 |      |   |              |              |
| 675: 64    | 1 64       | 1 63      | 1 63 | 0 | 1340.7458400 | 1340.7455083 |
| 0.0003317  | -0.0004000 | 0.0000000 |      |   |              |              |
| 676: 65    | 1 65       | 1 64      | 1 64 | 0 | 1340.9722300 | 1340.9719038 |
| 0.0003262  | -0.0004000 | 0.0000000 |      |   |              |              |
| 677: 66    | 1 66       | 1 65      | 1 65 | 0 | 1341.1981500 | 1341.1979969 |
| 0.0001531  | -0.0004000 | 0.0000000 |      |   |              |              |
| 678: 67    | 1 67       | 1 66      | 1 66 | 0 | 1341.4240700 | 1341.4237863 |
| 0.0002837  | -0.0004000 | 0.0000000 |      |   |              |              |
| 679: 68    | 1 68       | 1 67      | 1 67 | 0 | 1341.6493800 | 1341.6492706 |
| 0.0001094  | -0.0004000 | 0.0000000 |      |   |              |              |
| 680: 69    | 1 69       | 1 68      | 1 68 | 0 | 1341.8743300 | 1341.8744485 |

|            |            |           |              |              |
|------------|------------|-----------|--------------|--------------|
| -0.0001185 | -0.0004000 | 0.0000000 |              |              |
| 681: 70    | 1 70       | 1 69      | 1 69         | 0            |
| 0.0001813  | -0.0004000 | 0.0000000 | 1342.0995000 | 1342.0993187 |
| 682: 71    | 1 71       | 1 70      | 1 70         | 0            |
| 0.0001204  | -0.0004000 | 0.0000000 | 1342.3240000 | 1342.3238796 |
| 683: 72    | 1 72       | 1 71      | 1 71         | 0            |
| -0.0002000 | -0.0004000 | 0.0000000 | 1342.5479300 | 1342.5481300 |
| 684: 73    | 1 73       | 1 72      | 1 72         | 0            |
| 0.0001017  | -0.0004000 | 0.0000000 | 1342.7721700 | 1342.7720683 |
| 685: 74    | 1 74       | 1 73      | 1 73         | 0            |
| -0.0001031 | -0.0004000 | 0.0000000 | 1342.9955900 | 1342.9956931 |
| 686: 75    | 1 75       | 1 74      | 1 74         | 0            |
| 0.0005569  | -0.0004000 | 0.0000000 | 1343.2195600 | 1343.2190031 |
| 687: 76    | 1 76       | 1 75      | 1 75         | 0            |
| 0.0001334  | -0.0004000 | 0.0000000 | 1343.4421300 | 1343.4419966 |
| 688: 77    | 1 77       | 1 76      | 1 76         | 0            |
| 0.0001077  | -0.0004000 | 0.0000000 | 1343.6647800 | 1343.6646723 |
| 689: 78    | 1 78       | 1 77      | 1 77         | 0            |
| -0.0001486 | -0.0004000 | 0.0000000 | 1343.8868800 | 1343.8870286 |
| 690: 79    | 1 79       | 1 78      | 1 78         | 0            |
| -0.0000441 | -0.0004000 | 0.0000000 | 1344.1090200 | 1344.1090641 |
| 691: 80    | 1 80       | 1 79      | 1 79         | 0            |
| 0.0000127  | -0.0004000 | 0.0000000 | 1344.3307900 | 1344.3307773 |
| 692: 81    | 1 81       | 1 80      | 1 80         | 0            |
| 0.0001033  | -0.0004000 | 0.0000000 | 1344.5522700 | 1344.5521667 |
| 693: 82    | 1 82       | 1 81      | 1 81         | 0            |
| -0.0001608 | -0.0004000 | 0.0000000 | 1344.7730700 | 1344.7732308 |
| 694: 83    | 1 83       | 1 82      | 1 82         | 0            |
| -0.0000880 | -0.0004000 | 0.0000000 | 1344.9938800 | 1344.9939680 |
| 695: 84    | 1 84       | 1 83      | 1 83         | 0            |
| -0.0003470 | -0.0004000 | 0.0000000 | 1345.2140300 | 1345.2143770 |
| 696: 85    | 1 85       | 1 84      | 1 84         | 0            |
| -0.0000461 | -0.0004000 | 0.0000000 | 1345.4344100 | 1345.4344561 |
| 697: 86    | 1 86       | 1 85      | 1 85         | 0            |
| 0.0000661  | -0.0004000 | 0.0000000 | 1345.6542700 | 1345.6542039 |
| 698: 87    | 1 87       | 1 86      | 1 86         | 0            |
| 0.0003312  | -0.0004000 | 0.0000000 | 1345.8739500 | 1345.8736188 |
| 699: 88    | 1 88       | 1 87      | 1 87         | 0            |
| -0.0002195 | -0.0004000 | 0.0000000 | 1346.0924800 | 1346.0926995 |
| 700: 89    | 1 89       | 1 88      | 1 88         | 0            |
| 0.0005258  | -0.0004000 | 0.0000000 | 1346.3119700 | 1346.3114442 |
| 701: 90    | 1 90       | 1 89      | 1 89         | 0            |
| -0.0009816 | -0.0004000 | 0.0000000 | 1346.5288700 | 1346.5298516 |
| 702: 91    | 1 91       | 1 90      | 1 90         | 0            |
| -0.0003902 | -0.0004000 | 0.0000000 | 1346.7475300 | 1346.7479202 |
| 703: 90    | 2 88       | 1 91      | 2 89         | 0            |
| 0.0002611  | -0.0004000 | 0.0000000 | 1302.1895700 | 1302.1893089 |
| 704: 89    | 2 87       | 1 90      | 2 88         | 0            |
| 0.0001351  | -0.0004000 | 0.0000000 | 1302.4451300 | 1302.4449949 |
| 705: 88    | 2 86       | 1 89      | 2 87         | 0            |
| -0.0004350 | -0.0004000 | 0.0000000 | 1302.7001600 | 1302.7005950 |
| 706: 86    | 2 84       | 1 87      | 2 85         | 0            |
| -0.0002263 | -0.0004000 | 0.0000000 | 1303.2113000 | 1303.2115263 |
| 707: 85    | 2 83       | 1 86      | 2 84         | 0            |
| 0.0000485  | -0.0004000 | 0.0000000 | 1303.4669000 | 1303.4668515 |
| 708: 84    | 2 82       | 1 85      | 2 83         | 0            |
| 0.0004313  | -0.0004000 | 0.0000000 | 1303.7225100 | 1303.7220787 |
| 709: 76    | 2 74       | 1 77      | 2 75         | 0            |
| 0.0002969  | -0.0004000 | 0.0000000 | 1305.7601700 | 1305.7598731 |
| 710: 75    | 2 73       | 1 76      | 2 74         | 0            |
| -0.0002178 | -0.0004000 | 0.0000000 | 1306.0138000 | 1306.0140178 |
| 711: 73    | 2 71       | 1 74      | 2 72         | 0            |
| 0.0008485  | -0.0004000 | 0.0000000 | 1306.5227000 | 1306.5218515 |
| 712: 71    | 2 69       | 1 72      | 2 70         | 0            |
| 0.0003733  | -0.0004000 | 0.0000000 | 1307.0294000 | 1307.0290267 |

|            |            |           |      |   |              |              |
|------------|------------|-----------|------|---|--------------|--------------|
| 713: 64    | 2 62       | 1 65      | 2 63 | 0 | 1308.7984400 | 1308.7980489 |
| 0.0003911  | -0.0004000 | 0.0000000 |      |   |              |              |
| 714: 59    | 2 57       | 1 60      | 2 58 | 0 | 1310.0554900 | 1310.0552144 |
| 0.0002756  | -0.0004000 | 0.0000000 |      |   |              |              |
| 715: 58    | 2 56       | 1 59      | 2 57 | 0 | 1310.3056800 | 1310.3060698 |
| -0.0003898 | -0.0004000 | 0.0000000 |      |   |              |              |
| 716: 57    | 2 55       | 1 58      | 2 56 | 0 | 1310.5569900 | 1310.5567818 |
| 0.0002082  | -0.0004000 | 0.0000000 |      |   |              |              |
| 717: 56    | 2 54       | 1 57      | 2 55 | 0 | 1310.8079900 | 1310.8073846 |
| 0.0006054  | -0.0004000 | 0.0000000 |      |   |              |              |
| 718: 55    | 2 53       | 1 56      | 2 54 | 0 | 1311.0578200 | 1311.0579192 |
| -0.0000992 | -0.0004000 | 0.0000000 |      |   |              |              |
| 719: 54    | 2 52       | 1 55      | 2 53 | 0 | 1311.3083300 | 1311.3084333 |
| -0.0001033 | -0.0004000 | 0.0000000 |      |   |              |              |
| 720: 53    | 2 51       | 1 54      | 2 52 | 0 | 1311.5591200 | 1311.5589810 |
| 0.0001390  | -0.0004000 | 0.0000000 |      |   |              |              |
| 721: 52    | 2 50       | 1 53      | 2 51 | 0 | 1311.8091100 | 1311.8096211 |
| -0.0005111 | -0.0004000 | 0.0000000 |      |   |              |              |
| 722: 51    | 2 49       | 1 52      | 2 50 | 0 | 1312.0602100 | 1312.0604163 |
| -0.0002063 | -0.0004000 | 0.0000000 |      |   |              |              |
| 723: 50    | 2 48       | 1 51      | 2 49 | 0 | 1312.3116400 | 1312.3114313 |
| 0.0002087  | -0.0004000 | 0.0000000 |      |   |              |              |
| 724: 49    | 2 47       | 1 50      | 2 48 | 0 | 1312.5630600 | 1312.5627308 |
| 0.0003292  | -0.0004000 | 0.0000000 |      |   |              |              |
| 725: 48    | 2 46       | 1 49      | 2 47 | 0 | 1312.8140900 | 1312.8143776 |
| -0.0002876 | -0.0004000 | 0.0000000 |      |   |              |              |
| 726: 47    | 2 45       | 1 48      | 2 46 | 0 | 1313.0671600 | 1313.0664311 |
| 0.0007289  | -0.0004000 | 0.0000000 |      |   |              |              |
| 727: 46    | 2 44       | 1 47      | 2 45 | 0 | 1313.3188500 | 1313.3189451 |
| -0.0000951 | -0.0004000 | 0.0000000 |      |   |              |              |
| 728: 45    | 2 43       | 1 46      | 2 44 | 0 | 1313.5719600 | 1313.5719671 |
| -0.0000071 | -0.0004000 | 0.0000000 |      |   |              |              |
| 729: 43    | 2 41       | 1 44      | 2 42 | 0 | 1314.0796700 | 1314.0796868 |
| -0.0000168 | -0.0004000 | 0.0000000 |      |   |              |              |
| 730: 41    | 2 39       | 1 42      | 2 40 | 0 | 1314.5898100 | 1314.5898149 |
| -0.0000049 | -0.0004000 | 0.0000000 |      |   |              |              |
| 731: 40    | 2 38       | 1 41      | 2 39 | 0 | 1314.8459000 | 1314.8458190 |
| 0.0000810  | -0.0004000 | 0.0000000 |      |   |              |              |
| 732: 39    | 2 37       | 1 40      | 2 38 | 0 | 1315.1023800 | 1315.1024561 |
| -0.0000761 | -0.0004000 | 0.0000000 |      |   |              |              |
| 733: 37    | 2 35       | 1 38      | 2 36 | 0 | 1315.6176000 | 1315.6176164 |
| -0.0000164 | -0.0004000 | 0.0000000 |      |   |              |              |
| 734: 36    | 2 34       | 1 37      | 2 35 | 0 | 1315.8758800 | 1315.8761226 |
| -0.0002426 | -0.0004000 | 0.0000000 |      |   |              |              |
| 735: 32    | 2 30       | 1 33      | 2 31 | 0 | 1316.9166100 | 1316.9159966 |
| 0.0006134  | -0.0004000 | 0.0000000 |      |   |              |              |
| 736: 31    | 2 29       | 1 32      | 2 30 | 0 | 1317.1776000 | 1317.1773385 |
| 0.0002615  | -0.0004000 | 0.0000000 |      |   |              |              |
| 737: 30    | 2 28       | 1 31      | 2 29 | 0 | 1317.4384500 | 1317.4391885 |
| -0.0007385 | -0.0004000 | 0.0000000 |      |   |              |              |
| 738: 29    | 2 27       | 1 30      | 2 28 | 0 | 1317.7021600 | 1317.7015221 |
| 0.0006379  | -0.0004000 | 0.0000000 |      |   |              |              |
| 739: 28    | 2 26       | 1 29      | 2 27 | 0 | 1317.9646700 | 1317.9643121 |
| 0.0003579  | -0.0004000 | 0.0000000 |      |   |              |              |
| 740: 27    | 2 25       | 1 28      | 2 26 | 0 | 1318.2272500 | 1318.2275269 |
| -0.0002769 | -0.0004000 | 0.0000000 |      |   |              |              |
| 741: 26    | 2 24       | 1 27      | 2 25 | 0 | 1318.4910200 | 1318.4911301 |
| -0.0001101 | -0.0004000 | 0.0000000 |      |   |              |              |
| 742: 25    | 2 23       | 1 26      | 2 24 | 0 | 1318.7550800 | 1318.7550789 |
| 0.0000011  | -0.0004000 | 0.0000000 |      |   |              |              |
| 743: 24    | 2 22       | 1 25      | 2 23 | 0 | 1319.0194500 | 1319.0193228 |
| 0.0001272  | -0.0004000 | 0.0000000 |      |   |              |              |
| 744: 23    | 2 21       | 1 24      | 2 22 | 0 | 1319.2838700 | 1319.2838030 |
| 0.0000670  | -0.0004000 | 0.0000000 |      |   |              |              |
| 745: 22    | 2 20       | 1 23      | 2 21 | 0 | 1319.5488500 | 1319.5484514 |



|            |            |           |      |              |              |
|------------|------------|-----------|------|--------------|--------------|
| 0.0003986  | -0.0004000 | 0.0000000 |      |              |              |
| 746:       | 21         | 2 19      | 1 22 | 2 20         | 0            |
| 0.0000991  | -0.0004000 | 0.0000000 |      | 1319.8132900 | 1319.8131909 |
| 747:       | 18         | 2 16      | 1 19 | 2 17         | 0            |
| 0.0001225  | -0.0004000 | 0.0000000 |      | 1320.6071900 | 1320.6070675 |
| 748:       | 17         | 2 15      | 1 18 | 2 16         | 0            |
| 0.0000403  | -0.0004000 | 0.0000000 |      | 1320.8713000 | 1320.8712597 |
| 749:       | 15         | 2 13      | 1 16 | 2 14         | 0            |
| 0.0000241  | -0.0004000 | 0.0000000 |      | 1321.3984500 | 1321.3984259 |
| 750:       | 14         | 2 12      | 1 15 | 2 13         | 0            |
| -0.0000146 | -0.0004000 | 0.0000000 |      | 1321.6612200 | 1321.6612346 |
| 751:       | 13         | 2 11      | 1 14 | 2 12         | 0            |
| 0.0000423  | -0.0004000 | 0.0000000 |      | 1321.9234800 | 1321.9234377 |
| 752:       | 12         | 2 10      | 1 13 | 2 11         | 0            |
| 0.0000923  | -0.0004000 | 0.0000000 |      | 1322.1850800 | 1322.1849877 |
| 753:       | 11         | 2 9       | 1 12 | 2 10         | 0            |
| -0.0002340 | -0.0004000 | 0.0000000 |      | 1322.4456200 | 1322.4458540 |
| 754:       | 10         | 2 8       | 1 11 | 2 9          | 0            |
| -0.0006732 | -0.0004000 | 0.0000000 |      | 1322.7053500 | 1322.7060232 |
| 755:       | 9          | 2 7       | 1 10 | 2 8          | 0            |
| 0.0003924  | -0.0004000 | 0.0000000 |      | 1322.9658900 | 1322.9654976 |
| 756:       | 8          | 2 6       | 1 9  | 2 7          | 0            |
| 0.0000162  | -0.0004000 | 0.0000000 |      | 1323.2243100 | 1323.2242938 |
| 757:       | 3          | 2 1       | 1 2  | 2 0          | 0            |
| -0.0001142 | -0.0004000 | 0.0000000 |      | 1326.2940000 | 1326.2941142 |
| 758:       | 7          | 2 5       | 1 6  | 2 4          | 0            |
| -0.0003915 | -0.0004000 | 0.0000000 |      | 1327.3138200 | 1327.3142115 |
| 759:       | 8          | 2 6       | 1 7  | 2 5          | 0            |
| 0.0000947  | -0.0004000 | 0.0000000 |      | 1327.5700800 | 1327.5699853 |
| 760:       | 9          | 2 7       | 1 8  | 2 6          | 0            |
| 0.0001530  | -0.0004000 | 0.0000000 |      | 1327.8263500 | 1327.8261970 |
| 761:       | 10         | 2 8       | 1 9  | 2 7          | 0            |
| 0.0002933  | -0.0004000 | 0.0000000 |      | 1328.0832000 | 1328.0829067 |
| 762:       | 11         | 2 9       | 1 10 | 2 8          | 0            |
| -0.0001750 | -0.0004000 | 0.0000000 |      | 1328.3399900 | 1328.3401650 |
| 763:       | 12         | 2 10      | 1 11 | 2 9          | 0            |
| 0.0001397  | -0.0004000 | 0.0000000 |      | 1328.5981500 | 1328.5980103 |
| 764:       | 13         | 2 11      | 1 12 | 2 10         | 0            |
| -0.0001948 | -0.0004000 | 0.0000000 |      | 1328.8562700 | 1328.8564648 |
| 765:       | 14         | 2 12      | 1 13 | 2 11         | 0            |
| 0.0000977  | -0.0004000 | 0.0000000 |      | 1329.1156300 | 1329.1155323 |
| 766:       | 15         | 2 13      | 1 14 | 2 12         | 0            |
| -0.0003354 | -0.0004000 | 0.0000000 |      | 1329.3748600 | 1329.3751954 |
| 767:       | 16         | 2 14      | 1 15 | 2 13         | 0            |
| -0.0000143 | -0.0004000 | 0.0000000 |      | 1329.6354000 | 1329.6354143 |
| 768:       | 17         | 2 15      | 1 16 | 2 14         | 0            |
| 0.0002027  | -0.0004000 | 0.0000000 |      | 1329.8963300 | 1329.8961273 |
| 769:       | 18         | 2 16      | 1 17 | 2 15         | 0            |
| -0.0001817 | -0.0004000 | 0.0000000 |      | 1330.1570700 | 1330.1572517 |
| 770:       | 20         | 2 18      | 1 19 | 2 17         | 0            |
| -0.0000805 | -0.0004000 | 0.0000000 |      | 1330.6802400 | 1330.6803205 |
| 771:       | 21         | 2 19      | 1 20 | 2 18         | 0            |
| -0.0000787 | -0.0004000 | 0.0000000 |      | 1330.9419500 | 1330.9420287 |
| 772:       | 22         | 2 20      | 1 21 | 2 19         | 0            |
| -0.0000253 | -0.0004000 | 0.0000000 |      | 1331.2036600 | 1331.2036853 |
| 773:       | 23         | 2 21      | 1 22 | 2 20         | 0            |
| 0.0001055  | -0.0004000 | 0.0000000 |      | 1331.4652700 | 1331.4651645 |
| 774:       | 24         | 2 22      | 1 23 | 2 21         | 0            |
| 0.0002652  | -0.0004000 | 0.0000000 |      | 1331.7266100 | 1331.7263448 |
| 775:       | 25         | 2 23      | 1 24 | 2 22         | 0            |
| 0.0000686  | -0.0004000 | 0.0000000 |      | 1331.9871800 | 1331.9871114 |
| 776:       | 26         | 2 24      | 1 25 | 2 23         | 0            |
| -0.0003284 | -0.0004000 | 0.0000000 |      | 1332.2470300 | 1332.2473584 |
| 777:       | 27         | 2 25      | 1 26 | 2 24         | 0            |
| 0.0003513  | -0.0004000 | 0.0000000 |      | 1332.5073400 | 1332.5069887 |

|            |            |           |      |   |              |              |
|------------|------------|-----------|------|---|--------------|--------------|
| 778: 28    | 2 26       | 1 27      | 2 25 | 0 | 1332.7660300 | 1332.7659139 |
| 0.0001161  | -0.0004000 | 0.0000000 |      |   |              |              |
| 779: 29    | 2 27       | 1 28      | 2 26 | 0 | 1333.0240000 | 1333.0240538 |
| -0.0000538 | -0.0004000 | 0.0000000 |      |   |              |              |
| 780: 30    | 2 28       | 1 29      | 2 27 | 0 | 1333.2817800 | 1333.2813345 |
| 0.0004455  | -0.0004000 | 0.0000000 |      |   |              |              |
| 781: 31    | 2 29       | 1 30      | 2 28 | 0 | 1333.5373900 | 1333.5376872 |
| -0.0002972 | -0.0004000 | 0.0000000 |      |   |              |              |
| 782: 32    | 2 30       | 1 31      | 2 29 | 0 | 1333.7921800 | 1333.7930471 |
| -0.0008671 | -0.0004000 | 0.0000000 |      |   |              |              |
| 783: 33    | 2 31       | 1 32      | 2 30 | 0 | 1334.0471500 | 1334.0473517 |
| -0.0002017 | -0.0004000 | 0.0000000 |      |   |              |              |
| 784: 34    | 2 32       | 1 33      | 2 31 | 0 | 1334.3006500 | 1334.3005401 |
| 0.0001099  | -0.0004000 | 0.0000000 |      |   |              |              |
| 785: 35    | 2 33       | 1 34      | 2 32 | 0 | 1334.5527800 | 1334.5525523 |
| 0.0002277  | -0.0004000 | 0.0000000 |      |   |              |              |
| 786: 36    | 2 34       | 1 35      | 2 33 | 0 | 1334.8031700 | 1334.8033285 |
| -0.0001585 | -0.0004000 | 0.0000000 |      |   |              |              |
| 787: 37    | 2 35       | 1 36      | 2 34 | 0 | 1335.0528000 | 1335.0528099 |
| -0.0000099 | -0.0004000 | 0.0000000 |      |   |              |              |
| 788: 45    | 2 43       | 1 44      | 2 42 | 0 | 1336.9958000 | 1336.9958521 |
| -0.0000521 | -0.0004000 | 0.0000000 |      |   |              |              |
| 789: 46    | 2 44       | 1 45      | 2 43 | 0 | 1337.2314000 | 1337.2316310 |
| -0.0002310 | -0.0004000 | 0.0000000 |      |   |              |              |
| 790: 48    | 2 46       | 1 47      | 2 45 | 0 | 1337.6981700 | 1337.6984793 |
| -0.0003093 | -0.0004000 | 0.0000000 |      |   |              |              |
| 791: 49    | 2 47       | 1 48      | 2 46 | 0 | 1337.9292200 | 1337.9296511 |
| -0.0004311 | -0.0004000 | 0.0000000 |      |   |              |              |
| 792: 50    | 2 48       | 1 49      | 2 47 | 0 | 1338.1594600 | 1338.1594193 |
| 0.0000407  | -0.0004000 | 0.0000000 |      |   |              |              |
| 793: 51    | 2 49       | 1 50      | 2 48 | 0 | 1338.3878700 | 1338.3878773 |
| -0.0000073 | -0.0004000 | 0.0000000 |      |   |              |              |
| 794: 52    | 2 50       | 1 51      | 2 49 | 0 | 1338.6151600 | 1338.6151320 |
| 0.0000280  | -0.0004000 | 0.0000000 |      |   |              |              |
| 795: 53    | 2 51       | 1 52      | 2 50 | 0 | 1338.8412000 | 1338.8412997 |
| -0.0000997 | -0.0004000 | 0.0000000 |      |   |              |              |
| 796: 54    | 2 52       | 1 53      | 2 51 | 0 | 1339.0666500 | 1339.0665032 |
| 0.0001468  | -0.0004000 | 0.0000000 |      |   |              |              |
| 797: 55    | 2 53       | 1 54      | 2 52 | 0 | 1339.2911200 | 1339.2908671 |
| 0.0002529  | -0.0004000 | 0.0000000 |      |   |              |              |
| 798: 56    | 2 54       | 1 55      | 2 53 | 0 | 1339.5150500 | 1339.5145139 |
| 0.0005361  | -0.0004000 | 0.0000000 |      |   |              |              |
| 799: 58    | 2 56       | 1 57      | 2 55 | 0 | 1339.9595300 | 1339.9601162 |
| -0.0005862 | -0.0004000 | 0.0000000 |      |   |              |              |
| 800: 59    | 2 57       | 1 58      | 2 56 | 0 | 1340.1821800 | 1340.1822780 |
| -0.0000980 | -0.0004000 | 0.0000000 |      |   |              |              |
| 801: 60    | 2 58       | 1 59      | 2 57 | 0 | 1340.4044600 | 1340.4041313 |
| 0.0003287  | -0.0004000 | 0.0000000 |      |   |              |              |
| 802: 61    | 2 59       | 1 60      | 2 58 | 0 | 1340.6258100 | 1340.6257487 |
| 0.0000613  | -0.0004000 | 0.0000000 |      |   |              |              |
| 803: 62    | 2 60       | 1 61      | 2 59 | 0 | 1340.8469700 | 1340.8471894 |
| -0.0002194 | -0.0004000 | 0.0000000 |      |   |              |              |
| 804: 63    | 2 61       | 1 62      | 2 60 | 0 | 1341.0683600 | 1341.0685000 |
| -0.0001400 | -0.0004000 | 0.0000000 |      |   |              |              |
| 805: 64    | 2 62       | 1 63      | 2 61 | 0 | 1341.2899500 | 1341.2897155 |
| 0.0002345  | -0.0004000 | 0.0000000 |      |   |              |              |
| 806: 65    | 2 63       | 1 64      | 2 62 | 0 | 1341.5108300 | 1341.5108605 |
| -0.0000305 | -0.0004000 | 0.0000000 |      |   |              |              |
| 807: 66    | 2 64       | 1 65      | 2 63 | 0 | 1341.7320800 | 1341.7319503 |
| 0.0001297  | -0.0004000 | 0.0000000 |      |   |              |              |
| 808: 67    | 2 65       | 1 66      | 2 64 | 0 | 1341.9526100 | 1341.9529926 |
| -0.0003826 | -0.0004000 | 0.0000000 |      |   |              |              |
| 809: 68    | 2 66       | 1 67      | 2 65 | 0 | 1342.1737700 | 1342.1739886 |
| -0.0002186 | -0.0004000 | 0.0000000 |      |   |              |              |
| 810: 69    | 2 67       | 1 68      | 2 66 | 0 | 1342.3947500 | 1342.3949345 |

|            |            |           |              |              |
|------------|------------|-----------|--------------|--------------|
| -0.0001845 | -0.0004000 | 0.0000000 |              |              |
| 811: 70    | 2 68       | 1 69      | 2 67         | 0            |
|            |            |           | 1342.6156600 | 1342.6158224 |
| -0.0001624 | -0.0004000 | 0.0000000 |              |              |
| 812: 71    | 2 69       | 1 70      | 2 68         | 0            |
|            |            |           | 1342.8367700 | 1342.8366414 |
| 0.0001286  | -0.0004000 | 0.0000000 |              |              |
| 813: 72    | 2 70       | 1 71      | 2 69         | 0            |
|            |            |           | 1343.0577200 | 1343.0573787 |
| 0.0003413  | -0.0004000 | 0.0000000 |              |              |
| 814: 73    | 2 71       | 1 72      | 2 70         | 0            |
|            |            |           | 1343.2774800 | 1343.2780198 |
| -0.0005398 | -0.0004000 | 0.0000000 |              |              |
| 815: 74    | 2 72       | 1 73      | 2 71         | 0            |
|            |            |           | 1343.4988900 | 1343.4985497 |
| 0.0003403  | -0.0004000 | 0.0000000 |              |              |
| 816: 75    | 2 73       | 1 74      | 2 72         | 0            |
|            |            |           | 1343.7189200 | 1343.7189528 |
| -0.0000328 | -0.0004000 | 0.0000000 |              |              |
| 817: 76    | 2 74       | 1 75      | 2 73         | 0            |
|            |            |           | 1343.9391400 | 1343.9392135 |
| -0.0000735 | -0.0004000 | 0.0000000 |              |              |
| 818: 77    | 2 75       | 1 76      | 2 74         | 0            |
|            |            |           | 1344.1593600 | 1344.1593166 |
| 0.0000434  | -0.0004000 | 0.0000000 |              |              |
| 819: 79    | 2 77       | 1 78      | 2 76         | 0            |
|            |            |           | 1344.5991100 | 1344.5989911 |
| 0.0001189  | -0.0004000 | 0.0000000 |              |              |
| 820: 80    | 2 78       | 1 79      | 2 77         | 0            |
|            |            |           | 1344.8183300 | 1344.8185349 |
| -0.0002049 | -0.0004000 | 0.0000000 |              |              |
| 821: 82    | 2 80       | 1 81      | 2 79         | 0            |
|            |            |           | 1345.2563000 | 1345.2569717 |
| -0.0006717 | -0.0004000 | 0.0000000 |              |              |
| 822: 83    | 2 81       | 1 82      | 2 80         | 0            |
|            |            |           | 1345.4760600 | 1345.4758416 |
| 0.0002184  | -0.0004000 | 0.0000000 |              |              |
| 823: 84    | 2 82       | 1 83      | 2 81         | 0            |
|            |            |           | 1345.6943500 | 1345.6944650 |
| -0.0001150 | -0.0004000 | 0.0000000 |              |              |
| 824: 85    | 2 83       | 1 84      | 2 82         | 0            |
|            |            |           | 1345.9137200 | 1345.9128323 |
| 0.0008877  | -0.0004000 | 0.0000000 |              |              |
| 825: 86    | 2 84       | 1 85      | 2 83         | 0            |
|            |            |           | 1346.1323000 | 1346.1309344 |
| 0.0013656  | -0.0004000 | 0.0000000 |              |              |
| 826: 88    | 2 87       | 1 89      | 2 88         | 0            |
|            |            |           | 1302.9416600 | 1302.9418258 |
| -0.0001658 | -0.0004000 | 0.0000000 |              |              |
| 827: 87    | 2 86       | 1 88      | 2 87         | 0            |
|            |            |           | 1303.1971800 | 1303.1973128 |
| -0.0001328 | -0.0004000 | 0.0000000 |              |              |
| 828: 85    | 2 84       | 1 86      | 2 85         | 0            |
|            |            |           | 1303.7084200 | 1303.7080478 |
| 0.0003722  | -0.0004000 | 0.0000000 |              |              |
| 829: 84    | 2 83       | 1 85      | 2 84         | 0            |
|            |            |           | 1303.9627800 | 1303.9632933 |
| -0.0005133 | -0.0004000 | 0.0000000 |              |              |
| 830: 83    | 2 82       | 1 84      | 2 83         | 0            |
|            |            |           | 1304.2176900 | 1304.2184557 |
| -0.0007657 | -0.0004000 | 0.0000000 |              |              |
| 831: 82    | 2 81       | 1 83      | 2 82         | 0            |
|            |            |           | 1304.4738200 | 1304.4735339 |
| 0.0002861  | -0.0004000 | 0.0000000 |              |              |
| 832: 81    | 2 80       | 1 82      | 2 81         | 0            |
|            |            |           | 1304.7287800 | 1304.7285266 |
| 0.0002534  | -0.0004000 | 0.0000000 |              |              |
| 833: 80    | 2 79       | 1 81      | 2 80         | 0            |
|            |            |           | 1304.9839900 | 1304.9834327 |
| 0.0005573  | -0.0004000 | 0.0000000 |              |              |
| 834: 79    | 2 78       | 1 80      | 2 79         | 0            |
|            |            |           | 1305.2393700 | 1305.2382509 |
| 0.0011191  | -0.0004000 | 0.0000000 |              |              |
| 835: 78    | 2 77       | 1 79      | 2 78         | 0            |
|            |            |           | 1305.4930500 | 1305.4929801 |
| 0.0000699  | -0.0004000 | 0.0000000 |              |              |
| 836: 77    | 2 76       | 1 78      | 2 77         | 0            |
|            |            |           | 1305.7476800 | 1305.7476193 |
| 0.0000607  | -0.0004000 | 0.0000000 |              |              |
| 837: 75    | 2 74       | 1 76      | 2 75         | 0            |
|            |            |           | 1306.2559800 | 1306.2566232 |
| -0.0006432 | -0.0004000 | 0.0000000 |              |              |
| 838: 73    | 2 72       | 1 74      | 2 73         | 0            |
|            |            |           | 1306.7649000 | 1306.7652547 |
| -0.0003547 | -0.0004000 | 0.0000000 |              |              |
| 839: 71    | 2 70       | 1 72      | 2 71         | 0            |
|            |            |           | 1307.2733300 | 1307.2735070 |
| -0.0001770 | -0.0004000 | 0.0000000 |              |              |
| 840: 70    | 2 69       | 1 71      | 2 70         | 0            |
|            |            |           | 1307.5273100 | 1307.5274892 |
| -0.0001792 | -0.0004000 | 0.0000000 |              |              |
| 841: 69    | 2 68       | 1 70      | 2 69         | 0            |
|            |            |           | 1307.7813500 | 1307.7813747 |
| -0.0000247 | -0.0004000 | 0.0000000 |              |              |
| 842: 68    | 2 67       | 1 69      | 2 68         | 0            |
|            |            |           | 1308.0347900 | 1308.0351632 |
| -0.0003732 | -0.0004000 | 0.0000000 |              |              |

|                                 |              |              |
|---------------------------------|--------------|--------------|
| 843: 67 2 66 1 68 2 67 0        | 1308.2886900 | 1308.2888543 |
| -0.0001643 -0.0004000 0.0000000 |              |              |
| 844: 66 2 65 1 67 2 66 0        | 1308.5422600 | 1308.5424481 |
| -0.0001881 -0.0004000 0.0000000 |              |              |
| 845: 65 2 64 1 66 2 65 0        | 1308.7957000 | 1308.7959446 |
| -0.0002446 -0.0004000 0.0000000 |              |              |
| 846: 59 2 58 1 60 2 59 0        | 1310.3146000 | 1310.3149194 |
| -0.0003194 -0.0004000 0.0000000 |              |              |
| 847: 58 2 57 1 59 2 58 0        | 1310.5675100 | 1310.5677603 |
| -0.0002503 -0.0004000 0.0000000 |              |              |
| 848: 57 2 56 1 58 2 57 0        | 1310.8203400 | 1310.8205150 |
| -0.0001750 -0.0004000 0.0000000 |              |              |
| 849: 56 2 55 1 57 2 56 0        | 1311.0727400 | 1311.0731865 |
| -0.0004465 -0.0004000 0.0000000 |              |              |
| 850: 54 2 53 1 55 2 54 0        | 1311.5783500 | 1311.5782951 |
| 0.0000549 -0.0004000 0.0000000  |              |              |
| 851: 53 2 52 1 54 2 53 0        | 1311.8313200 | 1311.8307408 |
| 0.0005792 -0.0004000 0.0000000  |              |              |
| 852: 52 2 51 1 53 2 52 0        | 1312.0829900 | 1312.0831207 |
| -0.0001307 -0.0004000 0.0000000 |              |              |
| 853: 51 2 50 1 52 2 51 0        | 1312.3344400 | 1312.3354406 |
| -0.0010006 -0.0004000 0.0000000 |              |              |
| 854: 50 2 49 1 51 2 50 0        | 1312.5874500 | 1312.5877068 |
| -0.0002568 -0.0004000 0.0000000 |              |              |
| 855: 49 2 48 1 50 2 49 0        | 1312.8395700 | 1312.8399262 |
| -0.0003562 -0.0004000 0.0000000 |              |              |
| 856: 48 2 47 1 49 2 48 0        | 1313.0922800 | 1313.0921061 |
| 0.0001739 -0.0004000 0.0000000  |              |              |
| 857: 47 2 46 1 48 2 47 0        | 1313.3444400 | 1313.3442547 |
| 0.0001853 -0.0004000 0.0000000  |              |              |
| 858: 46 2 45 1 47 2 46 0        | 1313.5966300 | 1313.5963803 |
| 0.0002497 -0.0004000 0.0000000  |              |              |
| 859: 45 2 44 1 46 2 45 0        | 1313.8487300 | 1313.8484921 |
| 0.0002379 -0.0004000 0.0000000  |              |              |
| 860: 44 2 43 1 45 2 44 0        | 1314.1008100 | 1314.1005995 |
| 0.0002105 -0.0004000 0.0000000  |              |              |
| 861: 43 2 42 1 44 2 43 0        | 1314.3523300 | 1314.3527124 |
| -0.0003824 -0.0004000 0.0000000 |              |              |
| 862: 42 2 41 1 43 2 42 0        | 1314.6039200 | 1314.6048408 |
| -0.0009208 -0.0004000 0.0000000 |              |              |
| 863: 40 2 39 1 41 2 40 0        | 1315.1084700 | 1315.1091859 |
| -0.0007159 -0.0004000 0.0000000 |              |              |
| 864: 39 2 38 1 40 2 39 0        | 1315.3606800 | 1315.3614237 |
| -0.0007437 -0.0004000 0.0000000 |              |              |
| 865: 38 2 37 1 39 2 38 0        | 1315.6128100 | 1315.6137189 |
| -0.0009089 -0.0004000 0.0000000 |              |              |
| 866: 34 2 33 1 35 2 34 0        | 1316.6237000 | 1316.6236736 |
| 0.0000264 -0.0004000 0.0000000  |              |              |
| 867: 33 2 32 1 34 2 33 0        | 1316.8761700 | 1316.8764018 |
| -0.0002318 -0.0004000 0.0000000 |              |              |
| 868: 32 2 31 1 33 2 32 0        | 1317.1291100 | 1317.1292423 |
| -0.0001323 -0.0004000 0.0000000 |              |              |
| 869: 31 2 30 1 32 2 31 0        | 1317.3811900 | 1317.3822017 |
| -0.0010117 -0.0004000 0.0000000 |              |              |
| 870: 30 2 29 1 31 2 30 0        | 1317.6348000 | 1317.6352860 |
| -0.0004860 -0.0004000 0.0000000 |              |              |
| 871: 29 2 28 1 30 2 29 0        | 1317.8880500 | 1317.8885002 |
| -0.0004502 -0.0004000 0.0000000 |              |              |
| 872: 28 2 27 1 29 2 28 0        | 1318.1420600 | 1318.1418482 |
| 0.0002118 -0.0004000 0.0000000  |              |              |
| 873: 27 2 26 1 28 2 27 0        | 1318.3949000 | 1318.3953329 |
| -0.0004329 -0.0004000 0.0000000 |              |              |
| 874: 26 2 25 1 27 2 26 0        | 1318.6492400 | 1318.6489562 |
| 0.0002838 -0.0004000 0.0000000  |              |              |
| 875: 25 2 24 1 26 2 25 0        | 1318.9031400 | 1318.9027187 |

|            |            |           |              |              |
|------------|------------|-----------|--------------|--------------|
| 0.0004213  | -0.0004000 | 0.0000000 |              |              |
| 876: 24    | 2 23 1 25  | 2 24 0    | 1319.1566100 | 1319.1566201 |
| -0.0000101 | -0.0004000 | 0.0000000 |              |              |
| 877: 22    | 2 21 1 23  | 2 22 0    | 1319.6644100 | 1319.6648330 |
| -0.0004230 | -0.0004000 | 0.0000000 |              |              |
| 878: 21    | 2 20 1 22  | 2 21 0    | 1319.9193100 | 1319.9191385 |
| 0.0001715  | -0.0004000 | 0.0000000 |              |              |
| 879: 20    | 2 19 1 21  | 2 20 0    | 1320.1741600 | 1320.1735711 |
| 0.0005889  | -0.0004000 | 0.0000000 |              |              |
| 880: 19    | 2 18 1 20  | 2 19 0    | 1320.4281800 | 1320.4281253 |
| 0.0000547  | -0.0004000 | 0.0000000 |              |              |
| 881: 18    | 2 17 1 19  | 2 18 0    | 1320.6828800 | 1320.6827949 |
| 0.0000851  | -0.0004000 | 0.0000000 |              |              |
| 882: 17    | 2 16 1 18  | 2 17 0    | 1320.9371900 | 1320.9375727 |
| -0.0003827 | -0.0004000 | 0.0000000 |              |              |
| 883: 16    | 2 15 1 17  | 2 16 0    | 1321.1924600 | 1321.1924509 |
| 0.0000091  | -0.0004000 | 0.0000000 |              |              |
| 884: 15    | 2 14 1 16  | 2 15 0    | 1321.4476100 | 1321.4474207 |
| 0.0001893  | -0.0004000 | 0.0000000 |              |              |
| 885: 14    | 2 13 1 15  | 2 14 0    | 1321.7025300 | 1321.7024728 |
| 0.0000572  | -0.0004000 | 0.0000000 |              |              |
| 886: 13    | 2 12 1 14  | 2 13 0    | 1321.9576000 | 1321.9575972 |
| 0.0000028  | -0.0004000 | 0.0000000 |              |              |
| 887: 12    | 2 11 1 13  | 2 12 0    | 1322.2126800 | 1322.2127834 |
| -0.0001034 | -0.0004000 | 0.0000000 |              |              |
| 888: 11    | 2 10 1 12  | 2 11 0    | 1322.4679400 | 1322.4680202 |
| -0.0000802 | -0.0004000 | 0.0000000 |              |              |
| 889: 10    | 2 9 1 11   | 2 10 0    | 1322.7234000 | 1322.7232960 |
| 0.0001040  | -0.0004000 | 0.0000000 |              |              |
| 890: 9     | 2 8 1 10   | 2 9 0     | 1322.9787500 | 1322.9785988 |
| 0.0001512  | -0.0004000 | 0.0000000 |              |              |
| 891: 8     | 2 7 1 9    | 2 8 0     | 1323.2339000 | 1323.2339159 |
| -0.0000159 | -0.0004000 | 0.0000000 |              |              |
| 892: 7     | 2 6 1 8    | 2 7 0     | 1323.4898000 | 1323.4892344 |
| 0.0005656  | -0.0004000 | 0.0000000 |              |              |
| 893: 3     | 2 2 1 2    | 2 1 0     | 1326.2940000 | 1326.2937697 |
| 0.0002303  | -0.0004000 | 0.0000000 |              |              |
| 894: 6     | 2 5 1 5    | 2 4 0     | 1327.0557500 | 1327.0557541 |
| -0.0000041 | -0.0004000 | 0.0000000 |              |              |
| 895: 7     | 2 6 1 6    | 2 5 0     | 1327.3093100 | 1327.3093070 |
| 0.0000030  | -0.0004000 | 0.0000000 |              |              |
| 896: 8     | 2 7 1 7    | 2 6 0     | 1327.5629900 | 1327.5626092 |
| 0.0003808  | -0.0004000 | 0.0000000 |              |              |
| 897: 9     | 2 8 1 8    | 2 7 0     | 1327.8161300 | 1327.8156426 |
| 0.0004874  | -0.0004000 | 0.0000000 |              |              |
| 898: 11    | 2 10 1 10  | 2 9 0     | 1328.3203100 | 1328.3208292 |
| -0.0005192 | -0.0004000 | 0.0000000 |              |              |
| 899: 12    | 2 11 1 11  | 2 10 0    | 1328.5726100 | 1328.5729452 |
| -0.0003352 | -0.0004000 | 0.0000000 |              |              |
| 900: 13    | 2 12 1 12  | 2 11 0    | 1328.8248200 | 1328.8247179 |
| 0.0001021  | -0.0004000 | 0.0000000 |              |              |
| 901: 14    | 2 13 1 13  | 2 12 0    | 1329.0763500 | 1329.0761285 |
| 0.0002215  | -0.0004000 | 0.0000000 |              |              |
| 902: 15    | 2 14 1 14  | 2 13 0    | 1329.3276200 | 1329.3271580 |
| 0.0004620  | -0.0004000 | 0.0000000 |              |              |
| 903: 16    | 2 15 1 15  | 2 14 0    | 1329.5787700 | 1329.5777876 |
| 0.0009824  | -0.0004000 | 0.0000000 |              |              |
| 904: 17    | 2 16 1 16  | 2 15 0    | 1329.8281800 | 1329.8279987 |
| 0.0001813  | -0.0004000 | 0.0000000 |              |              |
| 905: 18    | 2 17 1 17  | 2 16 0    | 1330.0774700 | 1330.0777727 |
| -0.0003027 | -0.0004000 | 0.0000000 |              |              |
| 906: 19    | 2 18 1 18  | 2 17 0    | 1330.3268000 | 1330.3270914 |
| -0.0002914 | -0.0004000 | 0.0000000 |              |              |
| 907: 20    | 2 19 1 19  | 2 18 0    | 1330.5762900 | 1330.5759372 |
| 0.0003528  | -0.0004000 | 0.0000000 |              |              |

|                                 |              |              |
|---------------------------------|--------------|--------------|
| 908: 22 2 21 1 21 2 20 0        | 1331.0719500 | 1331.0721413 |
| -0.0001913 -0.0004000 0.0000000 |              |              |
| 909: 23 2 22 1 22 2 21 0        | 1331.3196700 | 1331.3194671 |
| 0.0002029 -0.0004000 0.0000000  |              |              |
| 910: 25 2 24 1 24 2 23 0        | 1331.8130600 | 1331.8124909 |
| 0.0005691 -0.0004000 0.0000000  |              |              |
| 911: 26 2 25 1 25 2 24 0        | 1332.0581700 | 1332.0581618 |
| 0.0000082 -0.0004000 0.0000000  |              |              |
| 912: 27 2 26 1 26 2 25 0        | 1332.3035600 | 1332.3032562 |
| 0.0003038 -0.0004000 0.0000000  |              |              |
| 913: 28 2 27 1 27 2 26 0        | 1332.5475600 | 1332.5477634 |
| -0.0002034 -0.0004000 0.0000000 |              |              |
| 914: 29 2 28 1 28 2 27 0        | 1332.7914200 | 1332.7916745 |
| -0.0002545 -0.0004000 0.0000000 |              |              |
| 915: 30 2 29 1 29 2 28 0        | 1333.0344400 | 1333.0349821 |
| -0.0005421 -0.0004000 0.0000000 |              |              |
| 916: 32 2 31 1 31 2 30 0        | 1333.5193900 | 1333.5197648 |
| -0.0003748 -0.0004000 0.0000000 |              |              |
| 917: 34 2 33 1 33 2 32 0        | 1334.0021200 | 1334.0020848 |
| 0.0000352 -0.0004000 0.0000000  |              |              |
| 918: 35 2 34 1 34 2 33 0        | 1334.2423900 | 1334.2423204 |
| 0.0000696 -0.0004000 0.0000000  |              |              |
| 919: 36 2 35 1 35 2 34 0        | 1334.4819600 | 1334.4819425 |
| 0.0000175 -0.0004000 0.0000000  |              |              |
| 920: 37 2 36 1 36 2 35 0        | 1334.7202300 | 1334.7209554 |
| -0.0007254 -0.0004000 0.0000000 |              |              |
| 921: 38 2 37 1 37 2 36 0        | 1334.9594800 | 1334.9593647 |
| 0.0001153 -0.0004000 0.0000000  |              |              |
| 922: 39 2 38 1 38 2 37 0        | 1335.1973700 | 1335.1971777 |
| 0.0001923 -0.0004000 0.0000000  |              |              |
| 923: 40 2 39 1 39 2 38 0        | 1335.4345600 | 1335.4344028 |
| 0.0001572 -0.0004000 0.0000000  |              |              |
| 924: 41 2 40 1 40 2 39 0        | 1335.6712600 | 1335.6710496 |
| 0.0002104 -0.0004000 0.0000000  |              |              |
| 925: 42 2 41 1 41 2 40 0        | 1335.9072400 | 1335.9071289 |
| 0.0001111 -0.0004000 0.0000000  |              |              |
| 926: 43 2 42 1 42 2 41 0        | 1336.1428200 | 1336.1426519 |
| 0.0001681 -0.0004000 0.0000000  |              |              |
| 927: 44 2 43 1 43 2 42 0        | 1336.3776300 | 1336.3776311 |
| -0.0000011 -0.0004000 0.0000000 |              |              |
| 928: 45 2 44 1 44 2 43 0        | 1336.6121400 | 1336.6120791 |
| 0.0000609 -0.0004000 0.0000000  |              |              |
| 929: 46 2 45 1 45 2 44 0        | 1336.8460100 | 1336.8460089 |
| 0.0000011 -0.0004000 0.0000000  |              |              |
| 930: 47 2 46 1 46 2 45 0        | 1337.0798200 | 1337.0794339 |
| 0.0003861 -0.0004000 0.0000000  |              |              |
| 931: 48 2 47 1 47 2 46 0        | 1337.3123200 | 1337.3123673 |
| -0.0000473 -0.0004000 0.0000000 |              |              |
| 932: 49 2 48 1 48 2 47 0        | 1337.5449100 | 1337.5448224 |
| 0.0000876 -0.0004000 0.0000000  |              |              |
| 933: 51 2 50 1 50 2 49 0        | 1338.0079800 | 1338.0083489 |
| -0.0003689 -0.0004000 0.0000000 |              |              |
| 934: 52 2 51 1 51 2 50 0        | 1338.2394700 | 1338.2394452 |
| 0.0000248 -0.0004000 0.0000000  |              |              |
| 935: 53 2 52 1 52 2 51 0        | 1338.4703900 | 1338.4701125 |
| 0.0002775 -0.0004000 0.0000000  |              |              |
| 936: 54 2 53 1 53 2 52 0        | 1338.7006500 | 1338.7003620 |
| 0.0002880 -0.0004000 0.0000000  |              |              |
| 937: 55 2 54 1 54 2 53 0        | 1338.9302200 | 1338.9302041 |
| 0.0000159 -0.0004000 0.0000000  |              |              |
| 938: 56 2 55 1 55 2 54 0        | 1339.1598100 | 1339.1596484 |
| 0.0001616 -0.0004000 0.0000000  |              |              |
| 939: 57 2 56 1 56 2 55 0        | 1339.3887900 | 1339.3887041 |
| 0.0000859 -0.0004000 0.0000000  |              |              |
| 940: 58 2 57 1 57 2 56 0        | 1339.6174500 | 1339.6173795 |

|            |            |           |              |              |
|------------|------------|-----------|--------------|--------------|
| 0.0000705  | -0.0004000 | 0.0000000 |              |              |
| 941: 59    | 2 58       | 1 58      | 2 57         | 0            |
| -0.0000423 | -0.0004000 | 0.0000000 | 1339.8456400 | 1339.8456823 |
| 942: 60    | 2 59       | 1 59      | 2 58         | 0            |
| -0.0003293 | -0.0004000 | 0.0000000 | 1340.0732900 | 1340.0736193 |
| 943: 64    | 2 63       | 1 63      | 2 62         | 0            |
| 0.0000642  | -0.0004000 | 0.0000000 | 1340.9818900 | 1340.9818258 |
| 944: 65    | 2 64       | 1 64      | 2 63         | 0            |
| -0.0003754 | -0.0004000 | 0.0000000 | 1341.2076400 | 1341.2080154 |
| 945: 66    | 2 65       | 1 65      | 2 64         | 0            |
| 0.0001824  | -0.0004000 | 0.0000000 | 1341.4340500 | 1341.4338676 |
| 946: 67    | 2 66       | 1 66      | 2 65         | 0            |
| -0.0004052 | -0.0004000 | 0.0000000 | 1341.6589800 | 1341.6593852 |
| 947: 68    | 2 67       | 1 67      | 2 66         | 0            |
| -0.0002906 | -0.0004000 | 0.0000000 | 1341.8842800 | 1341.8845706 |
| 948: 75    | 2 74       | 1 74      | 2 73         | 0            |
| 0.0010861  | -0.0004000 | 0.0000000 | 1343.4527700 | 1343.4516839 |
| 949: 76    | 2 75       | 1 75      | 2 74         | 0            |
| 0.0011170  | -0.0004000 | 0.0000000 | 1343.6753700 | 1343.6742530 |
| 950: 78    | 2 77       | 1 77      | 2 76         | 0            |
| 0.0005170  | -0.0004000 | 0.0000000 | 1344.1189300 | 1344.1184130 |
| 951: 79    | 2 78       | 1 78      | 2 77         | 0            |
| 0.0004372  | -0.0004000 | 0.0000000 | 1344.3404400 | 1344.3400028 |
| 952: 80    | 2 79       | 1 79      | 2 78         | 0            |
| 0.0000750  | -0.0004000 | 0.0000000 | 1344.5613400 | 1344.5612650 |
| 953: 81    | 2 80       | 1 80      | 2 79         | 0            |
| 0.0002613  | -0.0004000 | 0.0000000 | 1344.7824600 | 1344.7821987 |
| 954: 82    | 2 81       | 1 81      | 2 80         | 0            |
| 0.0006569  | -0.0004000 | 0.0000000 | 1345.0034600 | 1345.0028031 |
| 955: 84    | 2 83       | 1 83      | 2 82         | 0            |
| 0.0003505  | -0.0004000 | 0.0000000 | 1345.4433700 | 1345.4430195 |
| 956: 85    | 2 84       | 1 84      | 2 83         | 0            |
| 0.0003806  | -0.0004000 | 0.0000000 | 1345.6630100 | 1345.6626294 |
| 957: 86    | 2 85       | 1 85      | 2 84         | 0            |
| 0.0000346  | -0.0004000 | 0.0000000 | 1345.8819400 | 1345.8819054 |
| 958: 87    | 2 86       | 1 86      | 2 85         | 0            |
| 0.0002336  | -0.0004000 | 0.0000000 | 1346.1010800 | 1346.1008464 |
| 959: 88    | 2 87       | 1 87      | 2 86         | 0            |
| -0.0001909 | -0.0004000 | 0.0000000 | 1346.3192600 | 1346.3194509 |
| 960: 89    | 2 88       | 1 88      | 2 87         | 0            |
| -0.0002277 | -0.0004000 | 0.0000000 | 1346.5374900 | 1346.5377177 |
| 961: 84    | 3 81       | 1 85      | 3 82         | 0            |
| 0.0003093  | -0.0004000 | 0.0000000 | 1303.4875200 | 1303.4872107 |
| 962: 83    | 3 80       | 1 84      | 3 81         | 0            |
| 0.0002081  | -0.0004000 | 0.0000000 | 1303.7416800 | 1303.7414719 |
| 963: 82    | 3 79       | 1 83      | 3 80         | 0            |
| 0.0000257  | -0.0004000 | 0.0000000 | 1303.9955700 | 1303.9955443 |
| 964: 81    | 3 78       | 1 82      | 3 79         | 0            |
| 0.0010864  | -0.0004000 | 0.0000000 | 1304.2505100 | 1304.2494236 |
| 965: 80    | 3 77       | 1 81      | 3 78         | 0            |
| 0.0005029  | -0.0004000 | 0.0000000 | 1304.5036100 | 1304.5031071 |
| 966: 79    | 3 76       | 1 80      | 3 77         | 0            |
| -0.0003247 | -0.0004000 | 0.0000000 | 1304.7562700 | 1304.7565947 |
| 967: 78    | 3 75       | 1 79      | 3 76         | 0            |
| -0.0006589 | -0.0004000 | 0.0000000 | 1305.0092300 | 1305.0098889 |
| 968: 76    | 3 73       | 1 77      | 3 74         | 0            |
| 0.0002443  | -0.0004000 | 0.0000000 | 1305.5161700 | 1305.5159257 |
| 969: 75    | 3 72       | 1 76      | 3 73         | 0            |
| -0.0006234 | -0.0004000 | 0.0000000 | 1305.7680700 | 1305.7686934 |
| 970: 62    | 3 59       | 1 63      | 3 60         | 0            |
| 0.0002745  | -0.0004000 | 0.0000000 | 1309.0560400 | 1309.0557655 |
| 971: 61    | 3 58       | 1 62      | 3 59         | 0            |
| -0.0000618 | -0.0004000 | 0.0000000 | 1309.3103100 | 1309.3103718 |
| 972: 60    | 3 57       | 1 61      | 3 58         | 0            |
| -0.0000738 | -0.0004000 | 0.0000000 | 1309.5653900 | 1309.5654638 |

|                                 |              |              |
|---------------------------------|--------------|--------------|
| 973: 59 3 56 1 60 3 57 0        | 1309.8218300 | 1309.8210739 |
| 0.0007561 -0.0004000 0.0000000  |              |              |
| 974: 58 3 55 1 59 3 56 0        | 1310.0765900 | 1310.0772287 |
| -0.0006387 -0.0004000 0.0000000 |              |              |
| 975: 57 3 54 1 58 3 55 0        | 1310.3343900 | 1310.3339498 |
| 0.0004402 -0.0004000 0.0000000  |              |              |
| 976: 56 3 53 1 57 3 54 0        | 1310.5913100 | 1310.5912534 |
| 0.0000566 -0.0004000 0.0000000  |              |              |
| 977: 53 3 50 1 54 3 51 0        | 1311.3665400 | 1311.3667548 |
| -0.0002148 -0.0004000 0.0000000 |              |              |
| 978: 52 3 49 1 53 3 50 0        | 1311.6265200 | 1311.6264656 |
| 0.0000544 -0.0004000 0.0000000  |              |              |
| 979: 51 3 48 1 52 3 49 0        | 1311.8864600 | 1311.8867805 |
| -0.0003205 -0.0004000 0.0000000 |              |              |
| 980: 50 3 47 1 51 3 48 0        | 1312.1480700 | 1312.1476950 |
| 0.0003750 -0.0004000 0.0000000  |              |              |
| 981: 49 3 46 1 50 3 47 0        | 1312.4090200 | 1312.4092023 |
| -0.0001823 -0.0004000 0.0000000 |              |              |
| 982: 47 3 44 1 48 3 45 0        | 1312.9340400 | 1312.9339556 |
| 0.0000844 -0.0004000 0.0000000  |              |              |
| 983: 46 3 43 1 47 3 44 0        | 1313.1968300 | 1313.1971749 |
| -0.0003449 -0.0004000 0.0000000 |              |              |
| 984: 45 3 42 1 46 3 43 0        | 1313.4608900 | 1313.4609326 |
| -0.0000426 -0.0004000 0.0000000 |              |              |
| 985: 43 3 40 1 44 3 41 0        | 1313.9900300 | 1313.9899670 |
| 0.0000630 -0.0004000 0.0000000  |              |              |
| 986: 42 3 39 1 43 3 40 0        | 1314.2559500 | 1314.2551820 |
| 0.0007680 -0.0004000 0.0000000  |              |              |
| 987: 41 3 38 1 42 3 39 0        | 1314.5210800 | 1314.5208105 |
| 0.0002695 -0.0004000 0.0000000  |              |              |
| 988: 40 3 37 1 41 3 38 0        | 1314.7861300 | 1314.7868044 |
| -0.0006744 -0.0004000 0.0000000 |              |              |
| 989: 39 3 36 1 40 3 37 0        | 1315.0529400 | 1315.0531080 |
| -0.0001680 -0.0004000 0.0000000 |              |              |
| 990: 38 3 35 1 39 3 36 0        | 1315.3196100 | 1315.3196581 |
| -0.0000481 -0.0004000 0.0000000 |              |              |
| 991: 37 3 34 1 38 3 35 0        | 1315.5858500 | 1315.5863840 |
| -0.0005340 -0.0004000 0.0000000 |              |              |
| 992: 36 3 33 1 37 3 34 0        | 1315.8539100 | 1315.8532092 |
| 0.0007008 -0.0004000 0.0000000  |              |              |
| 993: 34 3 31 1 35 3 32 0        | 1316.3875000 | 1316.3868307 |
| 0.0006693 -0.0004000 0.0000000  |              |              |
| 994: 32 3 29 1 33 3 30 0        | 1316.9200600 | 1316.9198621 |
| 0.0001979 -0.0004000 0.0000000  |              |              |
| 995: 31 3 28 1 32 3 29 0        | 1317.1854300 | 1317.1859601 |
| -0.0005301 -0.0004000 0.0000000 |              |              |
| 996: 30 3 27 1 31 3 28 0        | 1317.4516200 | 1317.4516878 |
| -0.0000678 -0.0004000 0.0000000 |              |              |
| 997: 29 3 26 1 30 3 27 0        | 1317.7168600 | 1317.7169874 |
| -0.0001274 -0.0004000 0.0000000 |              |              |
| 998: 28 3 25 1 29 3 26 0        | 1317.9816600 | 1317.9818123 |
| -0.0001523 -0.0004000 0.0000000 |              |              |
| 999: 27 3 24 1 28 3 25 0        | 1318.2458900 | 1318.2461271 |
| -0.0002371 -0.0004000 0.0000000 |              |              |
| 1000: 26 3 23 1 27 3 24 0       | 1318.5098600 | 1318.5099074 |
| -0.0000474 -0.0004000 0.0000000 |              |              |
| 1001: 25 3 22 1 26 3 23 0       | 1318.7731500 | 1318.7731396 |
| 0.0000104 -0.0004000 0.0000000  |              |              |
| 1002: 24 3 21 1 25 3 22 0       | 1319.0360400 | 1319.0358198 |
| 0.0002202 -0.0004000 0.0000000  |              |              |
| 1003: 23 3 20 1 24 3 21 0       | 1319.2978100 | 1319.2979521 |
| -0.0001421 -0.0004000 0.0000000 |              |              |
| 1004: 22 3 19 1 23 3 20 0       | 1319.5594000 | 1319.5595478 |
| -0.0001478 -0.0004000 0.0000000 |              |              |
| 1005: 21 3 18 1 22 3 19 0       | 1319.8205300 | 1319.8206233 |



|            |            |           |        |                           |
|------------|------------|-----------|--------|---------------------------|
| -0.0000933 | -0.0004000 | 0.0000000 |        |                           |
| 1006:      | 18         | 3 15 1 19 | 3 16 0 | 1320.6009800 1320.6009467 |
| 0.0000333  | -0.0004000 | 0.0000000 |        |                           |
| 1007:      | 17         | 3 14 1 18 | 3 15 0 | 1320.8600400 1320.8601690 |
| -0.0001290 | -0.0004000 | 0.0000000 |        |                           |
| 1008:      | 16         | 3 13 1 17 | 3 14 0 | 1321.1187600 1321.1189912 |
| -0.0002312 | -0.0004000 | 0.0000000 |        |                           |
| 1009:      | 15         | 3 12 1 16 | 3 13 0 | 1321.3777600 1321.3774385 |
| 0.0003215  | -0.0004000 | 0.0000000 |        |                           |
| 1010:      | 9          | 3 6 1 10  | 3 7 0  | 1322.9216400 1322.9215118 |
| 0.0001282  | -0.0004000 | 0.0000000 |        |                           |
| 1011:      | 7          | 3 4 1 8   | 3 5 0  | 1323.4342500 1323.4341386 |
| 0.0001114  | -0.0004000 | 0.0000000 |        |                           |
| 1012:      | 6          | 3 3 1 7   | 3 4 0  | 1323.6902400 1323.6901338 |
| 0.0001062  | -0.0004000 | 0.0000000 |        |                           |
| 1013:      | 5          | 3 2 1 6   | 3 3 0  | 1323.9459100 1323.9459331 |
| -0.0000231 | -0.0004000 | 0.0000000 |        |                           |
| 1014:      | 4          | 3 1 1 5   | 3 2 0  | 1324.2017700 1324.2015474 |
| 0.0002226  | -0.0004000 | 0.0000000 |        |                           |
| 1015:      | 4          | 3 1 1 3   | 3 0 0  | 1326.4956100 1326.4952808 |
| 0.0003292  | -0.0004000 | 0.0000000 |        |                           |
| 1016:      | 5          | 3 2 1 4   | 3 1 0  | 1326.7497700 1326.7495494 |
| 0.0002206  | -0.0004000 | 0.0000000 |        |                           |
| 1017:      | 6          | 3 3 1 5   | 3 2 0  | 1327.0035200 1327.0037369 |
| -0.0002169 | -0.0004000 | 0.0000000 |        |                           |
| 1018:      | 8          | 3 5 1 7   | 3 4 0  | 1327.5119500 1327.5119209 |
| 0.0000291  | -0.0004000 | 0.0000000 |        |                           |
| 1019:      | 9          | 3 6 1 8   | 3 5 0  | 1327.7656700 1327.7659478 |
| -0.0002778 | -0.0004000 | 0.0000000 |        |                           |
| 1020:      | 10         | 3 7 1 9   | 3 6 0  | 1328.0194800 1328.0199545 |
| -0.0004745 | -0.0004000 | 0.0000000 |        |                           |
| 1021:      | 16         | 3 13 1 15 | 3 12 0 | 1329.5453400 1329.5448792 |
| 0.0004608  | -0.0004000 | 0.0000000 |        |                           |
| 1022:      | 17         | 3 14 1 16 | 3 13 0 | 1329.7995900 1329.7994586 |
| 0.0001314  | -0.0004000 | 0.0000000 |        |                           |
| 1023:      | 18         | 3 15 1 17 | 3 14 0 | 1330.0545600 1330.0542573 |
| 0.0003027  | -0.0004000 | 0.0000000 |        |                           |
| 1024:      | 19         | 3 16 1 18 | 3 15 0 | 1330.3092300 1330.3093189 |
| -0.0000889 | -0.0004000 | 0.0000000 |        |                           |
| 1025:      | 20         | 3 17 1 19 | 3 16 0 | 1330.5645600 1330.5646891 |
| -0.0001291 | -0.0004000 | 0.0000000 |        |                           |
| 1026:      | 21         | 3 18 1 20 | 3 17 0 | 1330.8200500 1330.8204157 |
| -0.0003657 | -0.0004000 | 0.0000000 |        |                           |
| 1027:      | 22         | 3 19 1 21 | 3 18 0 | 1331.0765300 1331.0765472 |
| -0.0000172 | -0.0004000 | 0.0000000 |        |                           |
| 1028:      | 23         | 3 20 1 22 | 3 19 0 | 1331.3331200 1331.3331318 |
| -0.0000118 | -0.0004000 | 0.0000000 |        |                           |
| 1029:      | 24         | 3 21 1 23 | 3 20 0 | 1331.5901900 1331.5902155 |
| -0.0000255 | -0.0004000 | 0.0000000 |        |                           |
| 1030:      | 25         | 3 22 1 24 | 3 21 0 | 1331.8479800 1331.8478405 |
| 0.0001395  | -0.0004000 | 0.0000000 |        |                           |
| 1031:      | 26         | 3 23 1 25 | 3 22 0 | 1332.1059700 1332.1060427 |
| -0.0000727 | -0.0004000 | 0.0000000 |        |                           |
| 1032:      | 27         | 3 24 1 26 | 3 23 0 | 1332.3649500 1332.3648491 |
| 0.0001009  | -0.0004000 | 0.0000000 |        |                           |
| 1033:      | 28         | 3 25 1 27 | 3 24 0 | 1332.6241100 1332.6242752 |
| -0.0001652 | -0.0004000 | 0.0000000 |        |                           |
| 1034:      | 29         | 3 26 1 28 | 3 25 0 | 1332.8848300 1332.8843226 |
| 0.0005074  | -0.0004000 | 0.0000000 |        |                           |
| 1035:      | 30         | 3 27 1 29 | 3 26 0 | 1333.1447900 1333.1449760 |
| -0.0001860 | -0.0004000 | 0.0000000 |        |                           |
| 1036:      | 31         | 3 28 1 30 | 3 27 0 | 1333.4055500 1333.4062017 |
| -0.0006517 | -0.0004000 | 0.0000000 |        |                           |
| 1037:      | 32         | 3 29 1 31 | 3 28 0 | 1333.6679900 1333.6679464 |
| 0.0000436  | -0.0004000 | 0.0000000 |        |                           |

|            |            |           |      |   |              |              |
|------------|------------|-----------|------|---|--------------|--------------|
| 1038: 33   | 3 30       | 1 32      | 3 29 | 0 | 1333.9299900 | 1333.9301367 |
| -0.0001467 | -0.0004000 | 0.0000000 |      |   |              |              |
| 1039: 34   | 3 31       | 1 33      | 3 30 | 0 | 1334.1924600 | 1334.1926803 |
| -0.0002203 | -0.0004000 | 0.0000000 |      |   |              |              |
| 1040: 35   | 3 32       | 1 34      | 3 31 | 0 | 1334.4554700 | 1334.4554676 |
| 0.0000024  | -0.0004000 | 0.0000000 |      |   |              |              |
| 1041: 37   | 3 34       | 1 36      | 3 33 | 0 | 1334.9814000 | 1334.9812677 |
| 0.0001323  | -0.0004000 | 0.0000000 |      |   |              |              |
| 1042: 38   | 3 35       | 1 37      | 3 34 | 0 | 1335.2436700 | 1335.2440055 |
| -0.0003355 | -0.0004000 | 0.0000000 |      |   |              |              |
| 1043: 39   | 3 36       | 1 38      | 3 35 | 0 | 1335.5065200 | 1335.5064453 |
| 0.0000747  | -0.0004000 | 0.0000000 |      |   |              |              |
| 1044: 40   | 3 37       | 1 39      | 3 36 | 0 | 1335.7691200 | 1335.7684454 |
| 0.0006746  | -0.0004000 | 0.0000000 |      |   |              |              |
| 1045: 41   | 3 38       | 1 40      | 3 37 | 0 | 1336.0296400 | 1336.0298692 |
| -0.0002292 | -0.0004000 | 0.0000000 |      |   |              |              |
| 1046: 42   | 3 39       | 1 41      | 3 38 | 0 | 1336.2906100 | 1336.2905870 |
| 0.0000230  | -0.0004000 | 0.0000000 |      |   |              |              |
| 1047: 43   | 3 40       | 1 42      | 3 39 | 0 | 1336.5508100 | 1336.5504782 |
| 0.0003318  | -0.0004000 | 0.0000000 |      |   |              |              |
| 1048: 44   | 3 41       | 1 43      | 3 40 | 0 | 1336.8097500 | 1336.8094314 |
| 0.0003186  | -0.0004000 | 0.0000000 |      |   |              |              |
| 1049: 45   | 3 42       | 1 44      | 3 41 | 0 | 1337.0674200 | 1337.0673449 |
| 0.0000751  | -0.0004000 | 0.0000000 |      |   |              |              |
| 1050: 46   | 3 43       | 1 45      | 3 42 | 0 | 1337.3240000 | 1337.3241260 |
| -0.0001260 | -0.0004000 | 0.0000000 |      |   |              |              |
| 1051: 47   | 3 44       | 1 46      | 3 43 | 0 | 1337.5794300 | 1337.5796900 |
| -0.0002600 | -0.0004000 | 0.0000000 |      |   |              |              |
| 1052: 48   | 3 45       | 1 47      | 3 44 | 0 | 1337.8339000 | 1337.8339593 |
| -0.0000593 | -0.0004000 | 0.0000000 |      |   |              |              |
| 1053: 49   | 3 46       | 1 48      | 3 45 | 0 | 1338.0865200 | 1338.0868618 |
| -0.0003418 | -0.0004000 | 0.0000000 |      |   |              |              |
| 1054: 50   | 3 47       | 1 49      | 3 46 | 0 | 1338.3380200 | 1338.3383302 |
| -0.0003102 | -0.0004000 | 0.0000000 |      |   |              |              |
| 1055: 51   | 3 48       | 1 50      | 3 47 | 0 | 1338.5882600 | 1338.5883010 |
| -0.0000410 | -0.0004000 | 0.0000000 |      |   |              |              |
| 1056: 52   | 3 49       | 1 51      | 3 48 | 0 | 1338.8362800 | 1338.8367141 |
| -0.0004341 | -0.0004000 | 0.0000000 |      |   |              |              |
| 1057: 53   | 3 50       | 1 52      | 3 49 | 0 | 1339.0839000 | 1339.0835122 |
| 0.0003878  | -0.0004000 | 0.0000000 |      |   |              |              |
| 1058: 54   | 3 51       | 1 53      | 3 50 | 0 | 1339.3289800 | 1339.3286412 |
| 0.0003388  | -0.0004000 | 0.0000000 |      |   |              |              |
| 1059: 55   | 3 52       | 1 54      | 3 51 | 0 | 1339.5719100 | 1339.5720508 |
| -0.0001408 | -0.0004000 | 0.0000000 |      |   |              |              |
| 1060: 56   | 3 53       | 1 55      | 3 52 | 0 | 1339.8136600 | 1339.8136952 |
| -0.0000352 | -0.0004000 | 0.0000000 |      |   |              |              |
| 1061: 57   | 3 54       | 1 56      | 3 53 | 0 | 1340.0536800 | 1340.0535347 |
| 0.0001453  | -0.0004000 | 0.0000000 |      |   |              |              |
| 1062: 58   | 3 55       | 1 57      | 3 54 | 0 | 1340.2916300 | 1340.2915369 |
| 0.0000931  | -0.0004000 | 0.0000000 |      |   |              |              |
| 1063: 61   | 3 58       | 1 60      | 3 57 | 0 | 1340.9937800 | 1340.9943496 |
| -0.0005696 | -0.0004000 | 0.0000000 |      |   |              |              |
| 1064: 62   | 3 59       | 1 61      | 3 58 | 0 | 1341.2242200 | 1341.2248966 |
| -0.0006766 | -0.0004000 | 0.0000000 |      |   |              |              |
| 1065: 63   | 3 60       | 1 62      | 3 59 | 0 | 1341.4538000 | 1341.4536236 |
| 0.0001764  | -0.0004000 | 0.0000000 |      |   |              |              |
| 1066: 64   | 3 61       | 1 63      | 3 60 | 0 | 1341.6805600 | 1341.6805815 |
| -0.0000215 | -0.0004000 | 0.0000000 |      |   |              |              |
| 1067: 65   | 3 62       | 1 64      | 3 61 | 0 | 1341.9059900 | 1341.9058388 |
| 0.0001512  | -0.0004000 | 0.0000000 |      |   |              |              |
| 1068: 66   | 3 63       | 1 65      | 3 62 | 0 | 1342.1298400 | 1342.1294813 |
| 0.0003587  | -0.0004000 | 0.0000000 |      |   |              |              |
| 1069: 68   | 3 65       | 1 67      | 3 64 | 0 | 1342.5718500 | 1342.5723435 |
| -0.0004935 | -0.0004000 | 0.0000000 |      |   |              |              |
| 1070: 69   | 3 66       | 1 68      | 3 65 | 0 | 1342.7917900 | 1342.7918053 |

|            |            |           |              |              |
|------------|------------|-----------|--------------|--------------|
| -0.0000153 | -0.0004000 | 0.0000000 |              |              |
| 1071: 71   | 3 68       | 1 70      | 3 67         | 0            |
| 0.0008330  | -0.0004000 | 0.0000000 | 1343.2282900 | 1343.2274570 |
| 1072: 72   | 3 69       | 1 71      | 3 68         | 0            |
| -0.0007126 | -0.0004000 | 0.0000000 | 1343.4432100 | 1343.4439226 |
| 1073: 73   | 3 70       | 1 72      | 3 69         | 0            |
| 0.0003089  | -0.0004000 | 0.0000000 | 1343.6599700 | 1343.6596611 |
| 1074: 74   | 3 71       | 1 73      | 3 70         | 0            |
| 0.0001106  | -0.0004000 | 0.0000000 | 1343.8749100 | 1343.8747994 |
| 1075: 75   | 3 72       | 1 74      | 3 71         | 0            |
| -0.0002946 | -0.0004000 | 0.0000000 | 1344.0891600 | 1344.0894546 |
| 1076: 76   | 3 73       | 1 75      | 3 72         | 0            |
| 0.0009081  | -0.0004000 | 0.0000000 | 1344.3046400 | 1344.3037319 |
| 1077: 77   | 3 74       | 1 76      | 3 73         | 0            |
| 0.0001365  | -0.0004000 | 0.0000000 | 1344.5178600 | 1344.5177235 |
| 1078: 78   | 3 75       | 1 77      | 3 74         | 0            |
| 0.0004624  | -0.0004000 | 0.0000000 | 1344.7319700 | 1344.7315076 |
| 1079: 79   | 3 76       | 1 78      | 3 75         | 0            |
| -0.0005388 | -0.0004000 | 0.0000000 | 1344.9446100 | 1344.9451488 |
| 1080: 80   | 3 77       | 1 79      | 3 76         | 0            |
| -0.0004881 | -0.0004000 | 0.0000000 | 1345.1582100 | 1345.1586981 |
| 1081: 82   | 3 79       | 1 81      | 3 78         | 0            |
| 0.0002644  | -0.0004000 | 0.0000000 | 1345.5859300 | 1345.5856656 |
| 1082: 83   | 3 80       | 1 82      | 3 79         | 0            |
| 0.0007311  | -0.0004000 | 0.0000000 | 1345.7998600 | 1345.7991289 |
| 1083: 84   | 3 81       | 1 83      | 3 80         | 0            |
| -0.0006136 | -0.0004000 | 0.0000000 | 1346.0119800 | 1346.0125936 |
| 1084: 85   | 3 82       | 1 84      | 3 81         | 0            |
| -0.0003318 | -0.0004000 | 0.0000000 | 1346.2257300 | 1346.2260618 |
| 1085: 86   | 3 83       | 1 85      | 3 82         | 0            |
| 0.0003105  | -0.0004000 | 0.0000000 | 1346.4398400 | 1346.4395295 |
| 1086: 87   | 3 84       | 1 86      | 3 83         | 0            |
| 0.0001116  | -0.0004000 | 0.0000000 | 1346.6531000 | 1346.6529884 |
| 1087: 88   | 3 85       | 1 87      | 3 84         | 0            |
| -0.0006664 | -0.0004000 | 0.0000000 | 1346.8657600 | 1346.8664264 |
| 1088: 89   | 3 86       | 1 88      | 3 85         | 0            |
| 0.0000712  | -0.0004000 | 0.0000000 | 1347.0799000 | 1347.0798288 |
| 1089: 90   | 3 87       | 1 89      | 3 86         | 0            |
| -0.0005692 | -0.0004000 | 0.0000000 | 1347.2926100 | 1347.2931792 |
| 1090: 91   | 3 88       | 1 90      | 3 87         | 0            |
| 0.0001501  | -0.0004000 | 0.0000000 | 1347.5066100 | 1347.5064599 |
| 1091: 92   | 3 89       | 1 91      | 3 88         | 0            |
| 0.0009075  | -0.0004000 | 0.0000000 | 1347.7205600 | 1347.7196525 |
| 1092: 90   | 3 88       | 1 91      | 3 89         | 0            |
| -0.0001865 | -0.0004000 | 0.0000000 | 1302.1895700 | 1302.1897565 |
| 1093: 89   | 3 87       | 1 90      | 3 88         | 0            |
| -0.0003924 | -0.0004000 | 0.0000000 | 1302.4451300 | 1302.4455224 |
| 1094: 88   | 3 86       | 1 89      | 3 87         | 0            |
| -0.0010558 | -0.0004000 | 0.0000000 | 1302.7001600 | 1302.7012158 |
| 1095: 86   | 3 84       | 1 87      | 3 85         | 0            |
| -0.0010826 | -0.0004000 | 0.0000000 | 1303.2113000 | 1303.2123826 |
| 1096: 85   | 3 83       | 1 86      | 3 84         | 0            |
| -0.0009552 | -0.0004000 | 0.0000000 | 1303.4669000 | 1303.4678552 |
| 1097: 84   | 3 82       | 1 85      | 3 83         | 0            |
| -0.0007436 | -0.0004000 | 0.0000000 | 1303.7225100 | 1303.7232536 |
| 1098: 78   | 3 76       | 1 79      | 3 77         | 0            |
| 0.0009643  | -0.0004000 | 0.0000000 | 1305.2550600 | 1305.2540957 |
| 1099: 77   | 3 75       | 1 78      | 3 76         | 0            |
| 0.0010955  | -0.0004000 | 0.0000000 | 1305.5100800 | 1305.5089845 |
| 1100: 76   | 3 74       | 1 77      | 3 75         | 0            |
| 0.0003350  | -0.0004000 | 0.0000000 | 1305.7641400 | 1305.7638050 |
| 1101: 71   | 3 69       | 1 72      | 3 70         | 0            |
| 0.0006523  | -0.0004000 | 0.0000000 | 1307.0376200 | 1307.0369677 |
| 1102: 70   | 3 68       | 1 71      | 3 69         | 0            |
| 0.0005548  | -0.0004000 | 0.0000000 | 1307.2919900 | 1307.2914352 |

|            |            |           |      |   |              |              |
|------------|------------|-----------|------|---|--------------|--------------|
| 1103: 69   | 3 67       | 1 70      | 3 68 | 0 | 1307.5456100 | 1307.5458574 |
| -0.0002474 | -0.0004000 | 0.0000000 |      |   |              |              |
| 1104: 68   | 3 66       | 1 69      | 3 67 | 0 | 1307.8002200 | 1307.8002396 |
| -0.0000196 | -0.0004000 | 0.0000000 |      |   |              |              |
| 1105: 67   | 3 65       | 1 68      | 3 66 | 0 | 1308.0542300 | 1308.0545873 |
| -0.0003573 | -0.0004000 | 0.0000000 |      |   |              |              |
| 1106: 64   | 3 62       | 1 65      | 3 63 | 0 | 1308.8174400 | 1308.8174882 |
| -0.0000482 | -0.0004000 | 0.0000000 |      |   |              |              |
| 1107: 62   | 3 60       | 1 63      | 3 61 | 0 | 1309.3256200 | 1309.3260432 |
| -0.0004232 | -0.0004000 | 0.0000000 |      |   |              |              |
| 1108: 61   | 3 59       | 1 62      | 3 60 | 0 | 1309.5793800 | 1309.5803314 |
| -0.0009514 | -0.0004000 | 0.0000000 |      |   |              |              |
| 1109: 60   | 3 58       | 1 61      | 3 59 | 0 | 1309.8346800 | 1309.8346384 |
| 0.0000416  | -0.0004000 | 0.0000000 |      |   |              |              |
| 1110: 59   | 3 57       | 1 60      | 3 58 | 0 | 1310.0884400 | 1310.0889734 |
| -0.0005334 | -0.0004000 | 0.0000000 |      |   |              |              |
| 1111: 58   | 3 56       | 1 59      | 3 57 | 0 | 1310.3432100 | 1310.3433459 |
| -0.0001359 | -0.0004000 | 0.0000000 |      |   |              |              |
| 1112: 57   | 3 55       | 1 58      | 3 56 | 0 | 1310.5980800 | 1310.5977656 |
| 0.0003144  | -0.0004000 | 0.0000000 |      |   |              |              |
| 1113: 54   | 3 52       | 1 55      | 3 53 | 0 | 1311.3618100 | 1311.3614059 |
| 0.0004041  | -0.0004000 | 0.0000000 |      |   |              |              |
| 1114: 53   | 3 51       | 1 54      | 3 52 | 0 | 1311.6161200 | 1311.6161122 |
| 0.0000078  | -0.0004000 | 0.0000000 |      |   |              |              |
| 1115: 52   | 3 50       | 1 53      | 3 51 | 0 | 1311.8706300 | 1311.8709142 |
| -0.0002842 | -0.0004000 | 0.0000000 |      |   |              |              |
| 1116: 51   | 3 49       | 1 52      | 3 50 | 0 | 1312.1257900 | 1312.1258208 |
| -0.0000308 | -0.0004000 | 0.0000000 |      |   |              |              |
| 1117: 50   | 3 48       | 1 51      | 3 49 | 0 | 1312.3809100 | 1312.3808408 |
| 0.0000692  | -0.0004000 | 0.0000000 |      |   |              |              |
| 1118: 49   | 3 47       | 1 50      | 3 48 | 0 | 1312.6362000 | 1312.6359823 |
| 0.0002177  | -0.0004000 | 0.0000000 |      |   |              |              |
| 1119: 48   | 3 46       | 1 49      | 3 47 | 0 | 1312.8916700 | 1312.8912529 |
| 0.0004171  | -0.0004000 | 0.0000000 |      |   |              |              |
| 1120: 47   | 3 45       | 1 48      | 3 46 | 0 | 1313.1467000 | 1313.1466595 |
| 0.0000405  | -0.0004000 | 0.0000000 |      |   |              |              |
| 1121: 46   | 3 44       | 1 47      | 3 45 | 0 | 1313.4020500 | 1313.4022082 |
| -0.0001582 | -0.0004000 | 0.0000000 |      |   |              |              |
| 1122: 45   | 3 43       | 1 46      | 3 44 | 0 | 1313.6577700 | 1313.6579044 |
| -0.0001344 | -0.0004000 | 0.0000000 |      |   |              |              |
| 1123: 44   | 3 42       | 1 45      | 3 43 | 0 | 1313.9138100 | 1313.9137523 |
| 0.0000577  | -0.0004000 | 0.0000000 |      |   |              |              |
| 1124: 43   | 3 41       | 1 44      | 3 42 | 0 | 1314.1696900 | 1314.1697555 |
| -0.0000655 | -0.0004000 | 0.0000000 |      |   |              |              |
| 1125: 42   | 3 40       | 1 43      | 3 41 | 0 | 1314.4260800 | 1314.4259163 |
| 0.0001637  | -0.0004000 | 0.0000000 |      |   |              |              |
| 1126: 41   | 3 39       | 1 42      | 3 40 | 0 | 1314.6822600 | 1314.6822360 |
| 0.0000240  | -0.0004000 | 0.0000000 |      |   |              |              |
| 1127: 40   | 3 38       | 1 41      | 3 39 | 0 | 1314.9384400 | 1314.9387151 |
| -0.0002751 | -0.0004000 | 0.0000000 |      |   |              |              |
| 1128: 39   | 3 37       | 1 40      | 3 38 | 0 | 1315.1953000 | 1315.1953524 |
| -0.0000524 | -0.0004000 | 0.0000000 |      |   |              |              |
| 1129: 38   | 3 36       | 1 39      | 3 37 | 0 | 1315.4521800 | 1315.4521459 |
| 0.0000341  | -0.0004000 | 0.0000000 |      |   |              |              |
| 1130: 37   | 3 35       | 1 38      | 3 36 | 0 | 1315.7088900 | 1315.7090924 |
| -0.0002024 | -0.0004000 | 0.0000000 |      |   |              |              |
| 1131: 36   | 3 34       | 1 37      | 3 35 | 0 | 1315.9662500 | 1315.9661873 |
| 0.0000627  | -0.0004000 | 0.0000000 |      |   |              |              |
| 1132: 35   | 3 33       | 1 36      | 3 34 | 0 | 1316.2239100 | 1316.2234249 |
| 0.0004851  | -0.0004000 | 0.0000000 |      |   |              |              |
| 1133: 34   | 3 32       | 1 35      | 3 33 | 0 | 1316.4807600 | 1316.4807984 |
| -0.0000384 | -0.0004000 | 0.0000000 |      |   |              |              |
| 1134: 32   | 3 30       | 1 33      | 3 31 | 0 | 1316.9959100 | 1316.9959189 |
| -0.0000089 | -0.0004000 | 0.0000000 |      |   |              |              |
| 1135: 31   | 3 29       | 1 32      | 3 30 | 0 | 1317.2536700 | 1317.2536463 |

|            |            |           |              |              |
|------------|------------|-----------|--------------|--------------|
| 0.0000237  | -0.0004000 | 0.0000000 |              |              |
| 1136: 30   | 3 28 1 31  | 3 29 0    | 1317.5117900 | 1317.5114701 |
| 0.0003199  | -0.0004000 | 0.0000000 |              |              |
| 1137: 29   | 3 27 1 30  | 3 28 0    | 1317.7691900 | 1317.7693776 |
| -0.0001876 | -0.0004000 | 0.0000000 |              |              |
| 1138: 28   | 3 26 1 29  | 3 27 0    | 1318.0271200 | 1318.0273553 |
| -0.0002353 | -0.0004000 | 0.0000000 |              |              |
| 1139: 27   | 3 25 1 28  | 3 26 0    | 1318.2854900 | 1318.2853889 |
| 0.0001011  | -0.0004000 | 0.0000000 |              |              |
| 1140: 26   | 3 24 1 27  | 3 25 0    | 1318.5427700 | 1318.5434631 |
| -0.0006931 | -0.0004000 | 0.0000000 |              |              |
| 1141: 25   | 3 23 1 26  | 3 24 0    | 1318.8020400 | 1318.8015622 |
| 0.0004778  | -0.0004000 | 0.0000000 |              |              |
| 1142: 24   | 3 22 1 25  | 3 23 0    | 1319.0596800 | 1319.0596698 |
| 0.0000102  | -0.0004000 | 0.0000000 |              |              |
| 1143: 23   | 3 21 1 24  | 3 22 0    | 1319.3182900 | 1319.3177695 |
| 0.0005205  | -0.0004000 | 0.0000000 |              |              |
| 1144: 22   | 3 20 1 23  | 3 21 0    | 1319.5758000 | 1319.5758443 |
| -0.0000443 | -0.0004000 | 0.0000000 |              |              |
| 1145: 21   | 3 19 1 22  | 3 20 0    | 1319.8337800 | 1319.8338777 |
| -0.0000977 | -0.0004000 | 0.0000000 |              |              |
| 1146: 20   | 3 18 1 21  | 3 19 0    | 1320.0918200 | 1320.0918530 |
| -0.0000330 | -0.0004000 | 0.0000000 |              |              |
| 1147: 19   | 3 17 1 20  | 3 18 0    | 1320.3499500 | 1320.3497542 |
| 0.0001958  | -0.0004000 | 0.0000000 |              |              |
| 1148: 17   | 3 15 1 18  | 3 16 0    | 1320.8652000 | 1320.8652731 |
| -0.0000731 | -0.0004000 | 0.0000000 |              |              |
| 1149: 16   | 3 14 1 17  | 3 15 0    | 1321.1228200 | 1321.1228623 |
| -0.0000423 | -0.0004000 | 0.0000000 |              |              |
| 1150: 15   | 3 13 1 16  | 3 14 0    | 1321.3800000 | 1321.3803208 |
| -0.0003208 | -0.0004000 | 0.0000000 |              |              |
| 1151: 9    | 3 7 1 10   | 3 8 0     | 1322.9216400 | 1322.9217922 |
| -0.0001522 | -0.0004000 | 0.0000000 |              |              |
| 1152: 7    | 3 5 1 8    | 3 6 0     | 1323.4342500 | 1323.4342290 |
| 0.0000210  | -0.0004000 | 0.0000000 |              |              |
| 1153: 6    | 3 4 1 7    | 3 5 0     | 1323.6902400 | 1323.6901793 |
| 0.0000607  | -0.0004000 | 0.0000000 |              |              |
| 1154: 5    | 3 3 1 6    | 3 4 0     | 1323.9459100 | 1323.9459534 |
| -0.0000434 | -0.0004000 | 0.0000000 |              |              |
| 1155: 4    | 3 2 1 5    | 3 3 0     | 1324.2017700 | 1324.2015551 |
| 0.0002149  | -0.0004000 | 0.0000000 |              |              |
| 1156: 4    | 3 2 1 3    | 3 1 0     | 1326.4956100 | 1326.4952785 |
| 0.0003315  | -0.0004000 | 0.0000000 |              |              |
| 1157: 5    | 3 3 1 4    | 3 2 0     | 1326.7497700 | 1326.7495413 |
| 0.0002287  | -0.0004000 | 0.0000000 |              |              |
| 1158: 6    | 3 4 1 5    | 3 3 0     | 1327.0035200 | 1327.0037150 |
| -0.0001950 | -0.0004000 | 0.0000000 |              |              |
| 1159: 8    | 3 6 1 7    | 3 5 0     | 1327.5119500 | 1327.5118216 |
| 0.0001284  | -0.0004000 | 0.0000000 |              |              |
| 1160: 9    | 3 7 1 8    | 3 6 0     | 1327.7656700 | 1327.7657648 |
| -0.0000948 | -0.0004000 | 0.0000000 |              |              |
| 1161: 10   | 3 8 1 9    | 3 7 0     | 1328.0194800 | 1328.0196392 |
| -0.0001592 | -0.0004000 | 0.0000000 |              |              |
| 1162: 17   | 3 15 1 16  | 3 14 0    | 1329.7943700 | 1329.7947339 |
| -0.0003639 | -0.0004000 | 0.0000000 |              |              |
| 1163: 18   | 3 16 1 17  | 3 15 0    | 1330.0477100 | 1330.0479543 |
| -0.0002443 | -0.0004000 | 0.0000000 |              |              |
| 1164: 19   | 3 17 1 18  | 3 16 0    | 1330.3012900 | 1330.3010487 |
| 0.0002413  | -0.0004000 | 0.0000000 |              |              |
| 1165: 20   | 3 18 1 19  | 3 17 0    | 1330.5541900 | 1330.5540001 |
| 0.0001899  | -0.0004000 | 0.0000000 |              |              |
| 1166: 21   | 3 19 1 20  | 3 18 0    | 1330.8065800 | 1330.8067898 |
| -0.0002098 | -0.0004000 | 0.0000000 |              |              |
| 1167: 22   | 3 20 1 21  | 3 19 0    | 1331.0599000 | 1331.0593970 |
| 0.0005030  | -0.0004000 | 0.0000000 |              |              |

|       |            |            |           |   |    |   |    |   |              |              |
|-------|------------|------------|-----------|---|----|---|----|---|--------------|--------------|
| 1168: | 23         | 3          | 21        | 1 | 22 | 3 | 20 | 0 | 1331.3120200 | 1331.3117992 |
|       | 0.0002208  | -0.0004000 | 0.0000000 |   |    |   |    |   |              |              |
| 1169: | 24         | 3          | 22        | 1 | 23 | 3 | 21 | 0 | 1331.5648500 | 1331.5639728 |
|       | 0.0008772  | -0.0004000 | 0.0000000 |   |    |   |    |   |              |              |
| 1170: | 25         | 3          | 23        | 1 | 24 | 3 | 22 | 0 | 1331.8161000 | 1331.8158926 |
|       | 0.0002074  | -0.0004000 | 0.0000000 |   |    |   |    |   |              |              |
| 1171: | 26         | 3          | 24        | 1 | 25 | 3 | 23 | 0 | 1332.0675900 | 1332.0675325 |
|       | 0.0000575  | -0.0004000 | 0.0000000 |   |    |   |    |   |              |              |
| 1172: | 27         | 3          | 25        | 1 | 26 | 3 | 24 | 0 | 1332.3182000 | 1332.3188658 |
|       | -0.0006658 | -0.0004000 | 0.0000000 |   |    |   |    |   |              |              |
| 1173: | 28         | 3          | 26        | 1 | 27 | 3 | 25 | 0 | 1332.5698400 | 1332.5698649 |
|       | -0.0000249 | -0.0004000 | 0.0000000 |   |    |   |    |   |              |              |
| 1174: | 29         | 3          | 27        | 1 | 28 | 3 | 26 | 0 | 1332.8195800 | 1332.8205021 |
|       | -0.0009221 | -0.0004000 | 0.0000000 |   |    |   |    |   |              |              |
| 1175: | 30         | 3          | 28        | 1 | 29 | 3 | 27 | 0 | 1333.0708800 | 1333.0707496 |
|       | 0.0001304  | -0.0004000 | 0.0000000 |   |    |   |    |   |              |              |
| 1176: | 31         | 3          | 29        | 1 | 30 | 3 | 28 | 0 | 1333.3208400 | 1333.3205795 |
|       | 0.0002605  | -0.0004000 | 0.0000000 |   |    |   |    |   |              |              |
| 1177: | 32         | 3          | 30        | 1 | 31 | 3 | 29 | 0 | 1333.5700400 | 1333.5699646 |
|       | 0.0000754  | -0.0004000 | 0.0000000 |   |    |   |    |   |              |              |
| 1178: | 33         | 3          | 31        | 1 | 32 | 3 | 30 | 0 | 1333.8190000 | 1333.8188778 |
|       | 0.0001222  | -0.0004000 | 0.0000000 |   |    |   |    |   |              |              |
| 1179: | 34         | 3          | 32        | 1 | 33 | 3 | 31 | 0 | 1334.0672800 | 1334.0672929 |
|       | -0.0000129 | -0.0004000 | 0.0000000 |   |    |   |    |   |              |              |
| 1180: | 35         | 3          | 33        | 1 | 34 | 3 | 32 | 0 | 1334.3151500 | 1334.3151846 |
|       | -0.0000346 | -0.0004000 | 0.0000000 |   |    |   |    |   |              |              |
| 1181: | 36         | 3          | 34        | 1 | 35 | 3 | 33 | 0 | 1334.5622300 | 1334.5625286 |
|       | -0.0002986 | -0.0004000 | 0.0000000 |   |    |   |    |   |              |              |
| 1182: | 37         | 3          | 35        | 1 | 36 | 3 | 34 | 0 | 1334.8098300 | 1334.8093016 |
|       | 0.0005284  | -0.0004000 | 0.0000000 |   |    |   |    |   |              |              |
| 1183: | 46         | 3          | 44        | 1 | 45 | 3 | 43 | 0 | 1337.0009800 | 1337.0014509 |
|       | -0.0004709 | -0.0004000 | 0.0000000 |   |    |   |    |   |              |              |
| 1184: | 47         | 3          | 45        | 1 | 46 | 3 | 44 | 0 | 1337.2414400 | 1337.2415681 |
|       | -0.0001281 | -0.0004000 | 0.0000000 |   |    |   |    |   |              |              |
| 1185: | 48         | 3          | 46        | 1 | 47 | 3 | 45 | 0 | 1337.4809600 | 1337.4809637 |
|       | -0.0000037 | -0.0004000 | 0.0000000 |   |    |   |    |   |              |              |
| 1186: | 49         | 3          | 47        | 1 | 48 | 3 | 46 | 0 | 1337.7202200 | 1337.7196351 |
|       | 0.0005849  | -0.0004000 | 0.0000000 |   |    |   |    |   |              |              |
| 1187: | 50         | 3          | 48        | 1 | 49 | 3 | 47 | 0 | 1337.9575100 | 1337.9575817 |
|       | -0.0000717 | -0.0004000 | 0.0000000 |   |    |   |    |   |              |              |
| 1188: | 51         | 3          | 49        | 1 | 50 | 3 | 48 | 0 | 1338.1951800 | 1338.1948046 |
|       | 0.0003754  | -0.0004000 | 0.0000000 |   |    |   |    |   |              |              |
| 1189: | 52         | 3          | 50        | 1 | 51 | 3 | 49 | 0 | 1338.4314700 | 1338.4313069 |
|       | 0.0001631  | -0.0004000 | 0.0000000 |   |    |   |    |   |              |              |
| 1190: | 53         | 3          | 51        | 1 | 52 | 3 | 50 | 0 | 1338.6670900 | 1338.6670935 |
|       | -0.0000035 | -0.0004000 | 0.0000000 |   |    |   |    |   |              |              |
| 1191: | 54         | 3          | 52        | 1 | 53 | 3 | 51 | 0 | 1338.9024500 | 1338.9021708 |
|       | 0.0002792  | -0.0004000 | 0.0000000 |   |    |   |    |   |              |              |
| 1192: | 55         | 3          | 53        | 1 | 54 | 3 | 52 | 0 | 1339.1366300 | 1339.1365470 |
|       | 0.0000830  | -0.0004000 | 0.0000000 |   |    |   |    |   |              |              |
| 1193: | 56         | 3          | 54        | 1 | 55 | 3 | 53 | 0 | 1339.3700900 | 1339.3702314 |
|       | -0.0001414 | -0.0004000 | 0.0000000 |   |    |   |    |   |              |              |
| 1194: | 57         | 3          | 55        | 1 | 56 | 3 | 54 | 0 | 1339.6034900 | 1339.6032349 |
|       | 0.0002551  | -0.0004000 | 0.0000000 |   |    |   |    |   |              |              |
| 1195: | 58         | 3          | 56        | 1 | 57 | 3 | 55 | 0 | 1339.8357600 | 1339.8355694 |
|       | 0.0001906  | -0.0004000 | 0.0000000 |   |    |   |    |   |              |              |
| 1196: | 59         | 3          | 57        | 1 | 58 | 3 | 56 | 0 | 1340.0667300 | 1340.0672479 |
|       | -0.0005179 | -0.0004000 | 0.0000000 |   |    |   |    |   |              |              |
| 1197: | 60         | 3          | 58        | 1 | 59 | 3 | 57 | 0 | 1340.2985500 | 1340.2982841 |
|       | 0.0002659  | -0.0004000 | 0.0000000 |   |    |   |    |   |              |              |
| 1198: | 62         | 3          | 60        | 1 | 61 | 3 | 59 | 0 | 1340.7578700 | 1340.7584882 |
|       | -0.0006182 | -0.0004000 | 0.0000000 |   |    |   |    |   |              |              |
| 1199: | 63         | 3          | 61        | 1 | 62 | 3 | 60 | 0 | 1340.9875400 | 1340.9876864 |
|       | -0.0001464 | -0.0004000 | 0.0000000 |   |    |   |    |   |              |              |
| 1200: | 64         | 3          | 62        | 1 | 63 | 3 | 61 | 0 | 1341.2161500 | 1341.2163025 |

|            |            |           |              |              |
|------------|------------|-----------|--------------|--------------|
| -0.0001525 | -0.0004000 | 0.0000000 |              |              |
| 1201: 65   | 3 63       | 1 64      | 3 62         | 0            |
| 0.0000378  | -0.0004000 | 0.0000000 | 1341.4443900 | 1341.4443522 |
| 1202: 66   | 3 64       | 1 65      | 3 63         | 0            |
| 0.0001792  | -0.0004000 | 0.0000000 | 1341.6720300 | 1341.6718508 |
| 1203: 67   | 3 65       | 1 66      | 3 64         | 0            |
| -0.0001136 | -0.0004000 | 0.0000000 | 1341.8987000 | 1341.8988136 |
| 1204: 68   | 3 66       | 1 67      | 3 65         | 0            |
| -0.0000853 | -0.0004000 | 0.0000000 | 1342.1251700 | 1342.1252553 |
| 1205: 70   | 3 68       | 1 69      | 3 67         | 0            |
| -0.0002728 | -0.0004000 | 0.0000000 | 1342.5763600 | 1342.5766328 |
| 1206: 72   | 3 70       | 1 71      | 3 69         | 0            |
| -0.0007418 | -0.0004000 | 0.0000000 | 1343.0253500 | 1343.0260918 |
| 1207: 74   | 3 72       | 1 73      | 3 71         | 0            |
| -0.0002902 | -0.0004000 | 0.0000000 | 1343.4734400 | 1343.4737302 |
| 1208: 75   | 3 73       | 1 74      | 3 72         | 0            |
| 0.0005160  | -0.0004000 | 0.0000000 | 1343.6974100 | 1343.6968940 |
| 1209: 76   | 3 74       | 1 75      | 3 73         | 0            |
| 0.0010359  | -0.0004000 | 0.0000000 | 1343.9206700 | 1343.9196341 |
| 1210: 78   | 3 76       | 1 77      | 3 75         | 0            |
| 0.0000425  | -0.0004000 | 0.0000000 | 1344.3639200 | 1344.3638775 |
| 1211: 79   | 3 77       | 1 78      | 3 76         | 0            |
| 0.0003936  | -0.0004000 | 0.0000000 | 1344.5857900 | 1344.5853964 |
| 1212: 80   | 3 78       | 1 79      | 3 77         | 0            |
| -0.0006726 | -0.0004000 | 0.0000000 | 1344.8058500 | 1344.8065226 |
| 1213: 81   | 3 79       | 1 80      | 3 78         | 0            |
| 0.0000580  | -0.0004000 | 0.0000000 | 1345.0273200 | 1345.0272620 |
| 1214: 82   | 3 80       | 1 81      | 3 79         | 0            |
| -0.0005700 | -0.0004000 | 0.0000000 | 1345.2470500 | 1345.2476200 |
| 1215: 83   | 3 81       | 1 82      | 3 80         | 0            |
| -0.0006112 | -0.0004000 | 0.0000000 | 1345.4669900 | 1345.4676012 |
| 1216: 84   | 3 82       | 1 83      | 3 81         | 0            |
| 0.0001301  | -0.0004000 | 0.0000000 | 1345.6873400 | 1345.6872099 |
| 1217: 85   | 3 83       | 1 84      | 3 82         | 0            |
| 0.0003404  | -0.0004000 | 0.0000000 | 1345.9067900 | 1345.9064496 |
| 1218: 86   | 3 84       | 1 85      | 3 83         | 0            |
| 0.0001967  | -0.0004000 | 0.0000000 | 1346.1255200 | 1346.1253233 |
| 1219: 87   | 3 85       | 1 86      | 3 84         | 0            |
| -0.0001338 | -0.0004000 | 0.0000000 | 1346.3437000 | 1346.3438338 |
| 1220: 88   | 3 86       | 1 87      | 3 85         | 0            |
| -0.0003531 | -0.0004000 | 0.0000000 | 1346.5616300 | 1346.5619831 |
| 1221: 80   | 4 76       | 1 81      | 4 77         | 0            |
| -0.0001406 | -0.0004000 | 0.0000000 | 1304.2727800 | 1304.2729206 |
| 1222: 79   | 4 75       | 1 80      | 4 76         | 0            |
| -0.0002335 | -0.0004000 | 0.0000000 | 1304.5280100 | 1304.5282435 |
| 1223: 78   | 4 74       | 1 79      | 4 75         | 0            |
| -0.0004223 | -0.0004000 | 0.0000000 | 1304.7834800 | 1304.7839023 |
| 1224: 77   | 4 73       | 1 78      | 4 74         | 0            |
| 0.0002169  | -0.0004000 | 0.0000000 | 1305.0401500 | 1305.0399331 |
| 1225: 76   | 4 72       | 1 77      | 4 73         | 0            |
| 0.0003909  | -0.0004000 | 0.0000000 | 1305.2967600 | 1305.2963691 |
| 1226: 74   | 4 70       | 1 75      | 4 71         | 0            |
| 0.0004986  | -0.0004000 | 0.0000000 | 1305.8110700 | 1305.8105714 |
| 1227: 73   | 4 69       | 1 74      | 4 70         | 0            |
| 0.0002040  | -0.0004000 | 0.0000000 | 1306.0685900 | 1306.0683860 |
| 1228: 71   | 4 67       | 1 72      | 4 68         | 0            |
| 0.0001936  | -0.0004000 | 0.0000000 | 1306.5857300 | 1306.5855364 |
| 1229: 70   | 4 66       | 1 71      | 4 67         | 0            |
| 0.0005694  | -0.0004000 | 0.0000000 | 1306.8454700 | 1306.8449006 |
| 1230: 69   | 4 65       | 1 70      | 4 66         | 0            |
| 0.0008151  | -0.0004000 | 0.0000000 | 1307.1056200 | 1307.1048049 |
| 1231: 68   | 4 64       | 1 69      | 4 65         | 0            |
| 0.0000235  | -0.0004000 | 0.0000000 | 1307.3652800 | 1307.3652565 |
| 1232: 67   | 4 63       | 1 68      | 4 64         | 0            |
| 0.0002296  | -0.0004000 | 0.0000000 | 1307.6264900 | 1307.6262604 |

|            |                      |              |              |
|------------|----------------------|--------------|--------------|
| 1233: 66   | 4 62 1 67 4 63 0     | 1307.8879600 | 1307.8878190 |
| 0.0001410  | -0.0004000 0.0000000 |              |              |
| 1234: 65   | 4 61 1 66 4 62 0     | 1308.1496100 | 1308.1499323 |
| -0.0003223 | -0.0004000 0.0000000 |              |              |
| 1235: 64   | 4 60 1 65 4 61 0     | 1308.4122700 | 1308.4125975 |
| -0.0003275 | -0.0004000 0.0000000 |              |              |
| 1236: 63   | 4 59 1 64 4 60 0     | 1308.6756300 | 1308.6758091 |
| -0.0001791 | -0.0004000 0.0000000 |              |              |
| 1237: 62   | 4 58 1 63 4 59 0     | 1308.9391700 | 1308.9395578 |
| -0.0003878 | -0.0004000 0.0000000 |              |              |
| 1238: 61   | 4 57 1 62 4 58 0     | 1309.2038500 | 1309.2038307 |
| 0.0000193  | -0.0004000 0.0000000 |              |              |
| 1239: 60   | 4 56 1 61 4 57 0     | 1309.4685500 | 1309.4686102 |
| -0.0000602 | -0.0004000 0.0000000 |              |              |
| 1240: 59   | 4 55 1 60 4 56 0     | 1309.7335600 | 1309.7338735 |
| -0.0003135 | -0.0004000 0.0000000 |              |              |
| 1241: 58   | 4 54 1 59 4 55 0     | 1309.9995000 | 1309.9995920 |
| -0.0000920 | -0.0004000 0.0000000 |              |              |
| 1242: 57   | 4 53 1 58 4 54 0     | 1310.2650200 | 1310.2657310 |
| -0.0007110 | -0.0004000 0.0000000 |              |              |
| 1243: 56   | 4 52 1 57 4 53 0     | 1310.5325100 | 1310.5322490 |
| 0.0002610  | -0.0004000 0.0000000 |              |              |
| 1244: 55   | 4 51 1 56 4 52 0     | 1310.7993600 | 1310.7990981 |
| 0.0002619  | -0.0004000 0.0000000 |              |              |
| 1245: 53   | 4 49 1 54 4 50 0     | 1311.3338400 | 1311.3335658 |
| 0.0002742  | -0.0004000 0.0000000 |              |              |
| 1246: 52   | 4 48 1 53 4 49 0     | 1311.6008900 | 1311.6010595 |
| -0.0001695 | -0.0004000 0.0000000 |              |              |
| 1247: 50   | 4 46 1 51 4 47 0     | 1312.1363800 | 1312.1362279 |
| 0.0001521  | -0.0004000 0.0000000 |              |              |
| 1248: 49   | 4 45 1 50 4 46 0     | 1312.4040800 | 1312.4037633 |
| 0.0003167  | -0.0004000 0.0000000 |              |              |
| 1249: 48   | 4 44 1 49 4 45 0     | 1312.6719000 | 1312.6711759 |
| 0.0007241  | -0.0004000 0.0000000 |              |              |
| 1250: 47   | 4 43 1 48 4 44 0     | 1312.9389700 | 1312.9384026 |
| 0.0005674  | -0.0004000 0.0000000 |              |              |
| 1251: 46   | 4 42 1 47 4 43 0     | 1313.2059000 | 1313.2053857 |
| 0.0005143  | -0.0004000 0.0000000 |              |              |
| 1252: 45   | 4 41 1 46 4 42 0     | 1313.4724500 | 1313.4720747 |
| 0.0003753  | -0.0004000 0.0000000 |              |              |
| 1253: 44   | 4 40 1 45 4 41 0     | 1313.7390100 | 1313.7384269 |
| 0.0005831  | -0.0004000 0.0000000 |              |              |
| 1254: 43   | 4 39 1 44 4 40 0     | 1314.0049400 | 1314.0044078 |
| 0.0005322  | -0.0004000 0.0000000 |              |              |
| 1255: 42   | 4 38 1 43 4 39 0     | 1314.2703400 | 1314.2699913 |
| 0.0003487  | -0.0004000 0.0000000 |              |              |
| 1256: 41   | 4 37 1 42 4 38 0     | 1314.5347900 | 1314.5351590 |
| -0.0003690 | -0.0004000 0.0000000 |              |              |
| 1257: 40   | 4 36 1 41 4 37 0     | 1314.7996100 | 1314.7999002 |
| -0.0002902 | -0.0004000 0.0000000 |              |              |
| 1258: 39   | 4 35 1 40 4 36 0     | 1315.0636900 | 1315.0642107 |
| -0.0005207 | -0.0004000 0.0000000 |              |              |
| 1259: 38   | 4 34 1 39 4 35 0     | 1315.3274000 | 1315.3280916 |
| -0.0006916 | -0.0004000 0.0000000 |              |              |
| 1260: 37   | 4 33 1 38 4 34 0     | 1315.5915900 | 1315.5915491 |
| 0.0000409  | -0.0004000 0.0000000 |              |              |
| 1261: 34   | 4 30 1 35 4 31 0     | 1316.3797300 | 1316.3794903 |
| 0.0002397  | -0.0004000 0.0000000 |              |              |
| 1262: 33   | 4 29 1 34 4 30 0     | 1316.6413300 | 1316.6413740 |
| -0.0000440 | -0.0004000 0.0000000 |              |              |
| 1263: 32   | 4 28 1 33 4 29 0     | 1316.9030300 | 1316.9029024 |
| 0.0001276  | -0.0004000 0.0000000 |              |              |
| 1264: 31   | 4 27 1 32 4 28 0     | 1317.1640900 | 1317.1640918 |
| -0.0000018 | -0.0004000 0.0000000 |              |              |
| 1265: 30   | 4 26 1 31 4 27 0     | 1317.4249700 | 1317.4249583 |



|            |            |           |              |              |
|------------|------------|-----------|--------------|--------------|
| 0.0000117  | -0.0004000 | 0.0000000 |              |              |
| 1266: 29   | 4 25 1 30  | 4 26 0    | 1317.6853700 | 1317.6855175 |
| -0.0001475 | -0.0004000 | 0.0000000 |              |              |
| 1267: 28   | 4 24 1 29  | 4 25 0    | 1317.9458100 | 1317.9457840 |
| 0.0000260  | -0.0004000 | 0.0000000 |              |              |
| 1268: 27   | 4 23 1 28  | 4 24 0    | 1318.2060200 | 1318.2057717 |
| 0.0002483  | -0.0004000 | 0.0000000 |              |              |
| 1269: 20   | 4 16 1 21  | 4 17 0    | 1320.0189600 | 1320.0188313 |
| 0.0001287  | -0.0004000 | 0.0000000 |              |              |
| 1270: 19   | 4 15 1 20  | 4 16 0    | 1320.2771100 | 1320.2769672 |
| 0.0001428  | -0.0004000 | 0.0000000 |              |              |
| 1271: 18   | 4 14 1 19  | 4 15 0    | 1320.5350400 | 1320.5349051 |
| 0.0001349  | -0.0004000 | 0.0000000 |              |              |
| 1272: 17   | 4 13 1 18  | 4 14 0    | 1320.7928300 | 1320.7926502 |
| 0.0001798  | -0.0004000 | 0.0000000 |              |              |
| 1273: 16   | 4 12 1 17  | 4 13 0    | 1321.0501100 | 1321.0502069 |
| -0.0000969 | -0.0004000 | 0.0000000 |              |              |
| 1274: 15   | 4 11 1 16  | 4 12 0    | 1321.3077000 | 1321.3075793 |
| 0.0001207  | -0.0004000 | 0.0000000 |              |              |
| 1275: 14   | 4 10 1 15  | 4 11 0    | 1321.5646000 | 1321.5647710 |
| -0.0001710 | -0.0004000 | 0.0000000 |              |              |
| 1276: 13   | 4 9 1 14   | 4 10 0    | 1321.8214500 | 1321.8217856 |
| -0.0003356 | -0.0004000 | 0.0000000 |              |              |
| 1277: 12   | 4 8 1 13   | 4 9 0     | 1322.0782700 | 1322.0786262 |
| -0.0003562 | -0.0004000 | 0.0000000 |              |              |
| 1278: 10   | 4 6 1 11   | 4 7 0     | 1322.5916900 | 1322.5917974 |
| -0.0001074 | -0.0004000 | 0.0000000 |              |              |
| 1279: 8    | 4 4 1 9    | 4 5 0     | 1323.1043100 | 1323.1043078 |
| 0.0000022  | -0.0004000 | 0.0000000 |              |              |
| 1280: 7    | 4 3 1 8    | 4 4 0     | 1323.3605500 | 1323.3603222 |
| 0.0002278  | -0.0004000 | 0.0000000 |              |              |
| 1281: 6    | 4 2 1 7    | 4 3 0     | 1323.6160100 | 1323.6161799 |
| -0.0001699 | -0.0004000 | 0.0000000 |              |              |
| 1282: 5    | 4 1 1 6    | 4 2 0     | 1323.8719100 | 1323.8718837 |
| 0.0000263  | -0.0004000 | 0.0000000 |              |              |
| 1283: 4    | 4 0 1 5    | 4 1 0     | 1324.1279400 | 1324.1274368 |
| 0.0005032  | -0.0004000 | 0.0000000 |              |              |
| 1284: 5    | 4 1 1 4    | 4 0 0     | 1326.6752500 | 1326.6754046 |
| -0.0001546 | -0.0004000 | 0.0000000 |              |              |
| 1285: 6    | 4 2 1 5    | 4 1 0     | 1326.9295200 | 1326.9295259 |
| -0.0000059 | -0.0004000 | 0.0000000 |              |              |
| 1286: 7    | 4 3 1 6    | 4 2 0     | 1327.1835200 | 1327.1835405 |
| -0.0000205 | -0.0004000 | 0.0000000 |              |              |
| 1287: 8    | 4 4 1 7    | 4 3 0     | 1327.4369400 | 1327.4374529 |
| -0.0005129 | -0.0004000 | 0.0000000 |              |              |
| 1288: 9    | 4 5 1 8    | 4 4 0     | 1327.6910900 | 1327.6912676 |
| -0.0001776 | -0.0004000 | 0.0000000 |              |              |
| 1289: 10   | 4 6 1 9    | 4 5 0     | 1327.9448900 | 1327.9449893 |
| -0.0000993 | -0.0004000 | 0.0000000 |              |              |
| 1290: 11   | 4 7 1 10   | 4 6 0     | 1328.1985800 | 1328.1986229 |
| -0.0000429 | -0.0004000 | 0.0000000 |              |              |
| 1291: 12   | 4 8 1 11   | 4 7 0     | 1328.4515000 | 1328.4521736 |
| -0.0006736 | -0.0004000 | 0.0000000 |              |              |
| 1292: 13   | 4 9 1 12   | 4 8 0     | 1328.7050500 | 1328.7056469 |
| -0.0005969 | -0.0004000 | 0.0000000 |              |              |
| 1293: 14   | 4 10 1 13  | 4 9 0     | 1328.9589500 | 1328.9590486 |
| -0.0000986 | -0.0004000 | 0.0000000 |              |              |
| 1294: 16   | 4 12 1 15  | 4 11 0    | 1329.4658000 | 1329.4656625 |
| 0.0001375  | -0.0004000 | 0.0000000 |              |              |
| 1295: 17   | 4 13 1 16  | 4 12 0    | 1329.7187500 | 1329.7188887 |
| -0.0001387 | -0.0004000 | 0.0000000 |              |              |
| 1296: 18   | 4 14 1 17  | 4 13 0    | 1329.9719600 | 1329.9720716 |
| -0.0001116 | -0.0004000 | 0.0000000 |              |              |
| 1297: 19   | 4 15 1 18  | 4 14 0    | 1330.2248800 | 1330.2252200 |
| -0.0003400 | -0.0004000 | 0.0000000 |              |              |

|            |                      |              |              |
|------------|----------------------|--------------|--------------|
| 1298: 20   | 4 16 1 19 4 15 0     | 1330.4779200 | 1330.4783438 |
| -0.0004238 | -0.0004000 0.0000000 |              |              |
| 1299: 21   | 4 17 1 20 4 16 0     | 1330.7310600 | 1330.7314538 |
| -0.0003938 | -0.0004000 0.0000000 |              |              |
| 1300: 29   | 4 25 1 28 4 24 0     | 1332.7571600 | 1332.7576657 |
| -0.0005057 | -0.0004000 0.0000000 |              |              |
| 1301: 30   | 4 26 1 29 4 25 0     | 1333.0112200 | 1333.0114190 |
| -0.0001990 | -0.0004000 0.0000000 |              |              |
| 1302: 31   | 4 27 1 30 4 26 0     | 1333.2649700 | 1333.2653695 |
| -0.0003995 | -0.0004000 0.0000000 |              |              |
| 1303: 33   | 4 29 1 32 4 28 0     | 1333.7734100 | 1333.7740035 |
| -0.0005935 | -0.0004000 0.0000000 |              |              |
| 1304: 34   | 4 30 1 33 4 29 0     | 1334.0288100 | 1334.0287643 |
| 0.0000457  | -0.0004000 0.0000000 |              |              |
| 1305: 35   | 4 31 1 34 4 30 0     | 1334.2841800 | 1334.2838763 |
| 0.0003037  | -0.0004000 0.0000000 |              |              |
| 1306: 36   | 4 32 1 35 4 31 0     | 1334.5394000 | 1334.5393828 |
| 0.0000172  | -0.0004000 0.0000000 |              |              |
| 1307: 37   | 4 33 1 36 4 32 0     | 1334.7946500 | 1334.7953282 |
| -0.0006782 | -0.0004000 0.0000000 |              |              |
| 1308: 41   | 4 37 1 40 4 36 0     | 1335.8243200 | 1335.8243413 |
| -0.0000213 | -0.0004000 0.0000000 |              |              |
| 1309: 42   | 4 38 1 41 4 37 0     | 1336.0834600 | 1336.0830804 |
| 0.0003796  | -0.0004000 0.0000000 |              |              |
| 1310: 43   | 4 39 1 42 4 38 0     | 1336.3419400 | 1336.3424605 |
| -0.0005205 | -0.0004000 0.0000000 |              |              |
| 1311: 44   | 4 40 1 43 4 39 0     | 1336.6026100 | 1336.6024866 |
| 0.0001234  | -0.0004000 0.0000000 |              |              |
| 1312: 45   | 4 41 1 44 4 40 0     | 1336.8627900 | 1336.8631489 |
| -0.0003589 | -0.0004000 0.0000000 |              |              |
| 1313: 47   | 4 43 1 46 4 42 0     | 1337.3863200 | 1337.3862589 |
| 0.0000611  | -0.0004000 0.0000000 |              |              |
| 1314: 48   | 4 44 1 47 4 43 0     | 1337.6484600 | 1337.6485984 |
| -0.0001384 | -0.0004000 0.0000000 |              |              |
| 1315: 49   | 4 45 1 48 4 44 0     | 1337.9111400 | 1337.9113563 |
| -0.0002163 | -0.0004000 0.0000000 |              |              |
| 1316: 50   | 4 46 1 49 4 45 0     | 1338.1742700 | 1338.1744302 |
| -0.0001602 | -0.0004000 0.0000000 |              |              |
| 1317: 51   | 4 47 1 50 4 46 0     | 1338.4375800 | 1338.4377007 |
| -0.0001207 | -0.0004000 0.0000000 |              |              |
| 1318: 53   | 4 49 1 52 4 48 0     | 1338.9644300 | 1338.9642814 |
| 0.0001486  | -0.0004000 0.0000000 |              |              |
| 1319: 54   | 4 50 1 53 4 49 0     | 1339.2263600 | 1339.2272915 |
| -0.0009315 | -0.0004000 0.0000000 |              |              |
| 1320: 55   | 4 51 1 54 4 50 0     | 1339.4897100 | 1339.4899053 |
| -0.0001953 | -0.0004000 0.0000000 |              |              |
| 1321: 56   | 4 52 1 55 4 51 0     | 1339.7518900 | 1339.7519647 |
| -0.0000747 | -0.0004000 0.0000000 |              |              |
| 1322: 57   | 4 53 1 56 4 52 0     | 1340.0131600 | 1340.0133147 |
| -0.0001547 | -0.0004000 0.0000000 |              |              |
| 1323: 58   | 4 54 1 57 4 53 0     | 1340.2736500 | 1340.2738064 |
| -0.0001564 | -0.0004000 0.0000000 |              |              |
| 1324: 59   | 4 55 1 58 4 54 0     | 1340.5336300 | 1340.5332996 |
| 0.0003304  | -0.0004000 0.0000000 |              |              |
| 1325: 60   | 4 56 1 59 4 55 0     | 1340.7915500 | 1340.7916636 |
| -0.0001136 | -0.0004000 0.0000000 |              |              |
| 1326: 61   | 4 57 1 60 4 56 0     | 1341.0486900 | 1341.0487781 |
| -0.0000881 | -0.0004000 0.0000000 |              |              |
| 1327: 62   | 4 58 1 61 4 57 0     | 1341.3044600 | 1341.3045335 |
| -0.0000735 | -0.0004000 0.0000000 |              |              |
| 1328: 63   | 4 59 1 62 4 58 0     | 1341.5586400 | 1341.5588301 |
| -0.0001901 | -0.0004000 0.0000000 |              |              |
| 1329: 64   | 4 60 1 63 4 59 0     | 1341.8116100 | 1341.8115774 |
| 0.0000326  | -0.0004000 0.0000000 |              |              |
| 1330: 65   | 4 61 1 64 4 60 0     | 1342.0639400 | 1342.0626933 |

|            |            |           |              |              |
|------------|------------|-----------|--------------|--------------|
| 0.0012467  | -0.0004000 | 0.0000000 |              |              |
| 1331: 67   | 4 63 1 66  | 4 62 0    | 1342.5592400 | 1342.5597380 |
| -0.0004980 | -0.0004000 | 0.0000000 |              |              |
| 1332: 68   | 4 64 1 67  | 4 63 0    | 1342.8061000 | 1342.8055354 |
| 0.0005646  | -0.0004000 | 0.0000000 |              |              |
| 1333: 69   | 4 65 1 68  | 4 64 0    | 1343.0499900 | 1343.0494376 |
| 0.0005524  | -0.0004000 | 0.0000000 |              |              |
| 1334: 70   | 4 66 1 69  | 4 65 0    | 1343.2912700 | 1343.2913918 |
| -0.0001218 | -0.0004000 | 0.0000000 |              |              |
| 1335: 71   | 4 67 1 70  | 4 66 0    | 1343.5312000 | 1343.5313507 |
| -0.0001507 | -0.0004000 | 0.0000000 |              |              |
| 1336: 72   | 4 68 1 71  | 4 67 0    | 1343.7689700 | 1343.7692728 |
| -0.0003028 | -0.0004000 | 0.0000000 |              |              |
| 1337: 73   | 4 69 1 72  | 4 68 0    | 1344.0046800 | 1344.0051233 |
| -0.0004433 | -0.0004000 | 0.0000000 |              |              |
| 1338: 74   | 4 70 1 73  | 4 69 0    | 1344.2388900 | 1344.2388754 |
| 0.0000146  | -0.0004000 | 0.0000000 |              |              |
| 1339: 75   | 4 71 1 74  | 4 70 0    | 1344.4696600 | 1344.4705118 |
| -0.0008518 | -0.0004000 | 0.0000000 |              |              |
| 1340: 76   | 4 72 1 75  | 4 71 0    | 1344.6995900 | 1344.7000262 |
| -0.0004362 | -0.0004000 | 0.0000000 |              |              |
| 1341: 77   | 4 73 1 76  | 4 72 0    | 1344.9273100 | 1344.9274253 |
| -0.0001153 | -0.0004000 | 0.0000000 |              |              |
| 1342: 78   | 4 74 1 77  | 4 73 0    | 1345.1529400 | 1345.1527299 |
| 0.0002101  | -0.0004000 | 0.0000000 |              |              |
| 1343: 79   | 4 75 1 78  | 4 74 0    | 1345.3761000 | 1345.3759768 |
| 0.0001232  | -0.0004000 | 0.0000000 |              |              |
| 1344: 80   | 4 76 1 79  | 4 75 0    | 1345.5963500 | 1345.5972194 |
| -0.0008694 | -0.0004000 | 0.0000000 |              |              |
| 1345: 81   | 4 77 1 80  | 4 76 0    | 1345.8164800 | 1345.8165283 |
| -0.0000483 | -0.0004000 | 0.0000000 |              |              |
| 1346: 82   | 4 78 1 81  | 4 77 0    | 1346.0342400 | 1346.0339913 |
| 0.0002487  | -0.0004000 | 0.0000000 |              |              |
| 1347: 83   | 4 79 1 82  | 4 78 0    | 1346.2492300 | 1346.2497124 |
| -0.0004824 | -0.0004000 | 0.0000000 |              |              |
| 1348: 79   | 4 76 1 80  | 4 77 0    | 1304.7784800 | 1304.7788541 |
| -0.0003741 | -0.0004000 | 0.0000000 |              |              |
| 1349: 78   | 4 75 1 79  | 4 76 0    | 1305.0342900 | 1305.0347541 |
| -0.0004641 | -0.0004000 | 0.0000000 |              |              |
| 1350: 77   | 4 74 1 78  | 4 75 0    | 1305.2905600 | 1305.2906750 |
| -0.0001150 | -0.0004000 | 0.0000000 |              |              |
| 1351: 76   | 4 73 1 77  | 4 74 0    | 1305.5464900 | 1305.5466244 |
| -0.0001344 | -0.0004000 | 0.0000000 |              |              |
| 1352: 75   | 4 72 1 76  | 4 73 0    | 1305.8027500 | 1305.8026104 |
| 0.0001396  | -0.0004000 | 0.0000000 |              |              |
| 1353: 74   | 4 71 1 75  | 4 72 0    | 1306.0589700 | 1306.0586411 |
| 0.0003289  | -0.0004000 | 0.0000000 |              |              |
| 1354: 70   | 4 67 1 71  | 4 68 0    | 1307.0837400 | 1307.0833818 |
| 0.0003582  | -0.0004000 | 0.0000000 |              |              |
| 1355: 68   | 4 65 1 69  | 4 66 0    | 1307.5967900 | 1307.5962420 |
| 0.0005480  | -0.0004000 | 0.0000000 |              |              |
| 1356: 67   | 4 64 1 68  | 4 65 0    | 1307.8528700 | 1307.8528237 |
| 0.0000463  | -0.0004000 | 0.0000000 |              |              |
| 1357: 66   | 4 63 1 67  | 4 64 0    | 1308.1095800 | 1308.1095169 |
| 0.0000631  | -0.0004000 | 0.0000000 |              |              |
| 1358: 65   | 4 62 1 66  | 4 63 0    | 1308.3670700 | 1308.3663291 |
| 0.0007409  | -0.0004000 | 0.0000000 |              |              |
| 1359: 63   | 4 60 1 64  | 4 61 0    | 1308.8803300 | 1308.8803377 |
| -0.0000077 | -0.0004000 | 0.0000000 |              |              |
| 1360: 62   | 4 59 1 63  | 4 60 0    | 1309.1366800 | 1309.1375463 |
| -0.0008663 | -0.0004000 | 0.0000000 |              |              |
| 1361: 61   | 4 58 1 62  | 4 59 0    | 1309.3951800 | 1309.3948982 |
| 0.0002818  | -0.0004000 | 0.0000000 |              |              |
| 1362: 60   | 4 57 1 61  | 4 58 0    | 1309.6523400 | 1309.6523978 |
| -0.0000578 | -0.0004000 | 0.0000000 |              |              |

|            |                      |              |              |
|------------|----------------------|--------------|--------------|
| 1363: 59   | 4 56 1 60 4 57 0     | 1309.9100200 | 1309.9100488 |
| -0.0000288 | -0.0004000 0.0000000 |              |              |
| 1364: 58   | 4 55 1 59 4 56 0     | 1310.1675800 | 1310.1678540 |
| -0.0002740 | -0.0004000 0.0000000 |              |              |
| 1365: 57   | 4 54 1 58 4 55 0     | 1310.4256100 | 1310.4258153 |
| -0.0002053 | -0.0004000 0.0000000 |              |              |
| 1366: 56   | 4 53 1 57 4 54 0     | 1310.6837000 | 1310.6839336 |
| -0.0002336 | -0.0004000 0.0000000 |              |              |
| 1367: 55   | 4 52 1 56 4 53 0     | 1310.9424500 | 1310.9422090 |
| 0.0002410  | -0.0004000 0.0000000 |              |              |
| 1368: 53   | 4 50 1 54 4 51 0     | 1311.4598200 | 1311.4592257 |
| 0.0005943  | -0.0004000 0.0000000 |              |              |
| 1369: 52   | 4 49 1 53 4 50 0     | 1311.7183300 | 1311.7179619 |
| 0.0003681  | -0.0004000 0.0000000 |              |              |
| 1370: 51   | 4 48 1 52 4 49 0     | 1311.9772300 | 1311.9768447 |
| 0.0003853  | -0.0004000 0.0000000 |              |              |
| 1371: 50   | 4 47 1 51 4 48 0     | 1312.2364300 | 1312.2358691 |
| 0.0005609  | -0.0004000 0.0000000 |              |              |
| 1372: 49   | 4 46 1 50 4 47 0     | 1312.4948900 | 1312.4950287 |
| -0.0001387 | -0.0004000 0.0000000 |              |              |
| 1373: 48   | 4 45 1 49 4 46 0     | 1312.7540100 | 1312.7543162 |
| -0.0003062 | -0.0004000 0.0000000 |              |              |
| 1374: 47   | 4 44 1 48 4 45 0     | 1313.0135000 | 1313.0137234 |
| -0.0002234 | -0.0004000 0.0000000 |              |              |
| 1375: 46   | 4 43 1 47 4 44 0     | 1313.2733000 | 1313.2732410 |
| 0.0000590  | -0.0004000 0.0000000 |              |              |
| 1376: 45   | 4 42 1 46 4 43 0     | 1313.5330200 | 1313.5328589 |
| 0.0001611  | -0.0004000 0.0000000 |              |              |
| 1377: 44   | 4 41 1 45 4 42 0     | 1313.7922400 | 1313.7925662 |
| -0.0003262 | -0.0004000 0.0000000 |              |              |
| 1378: 42   | 4 39 1 43 4 40 0     | 1314.3119900 | 1314.3122013 |
| -0.0002113 | -0.0004000 0.0000000 |              |              |
| 1379: 40   | 4 37 1 41 4 38 0     | 1314.8320600 | 1314.8320452 |
| 0.0000148  | -0.0004000 0.0000000 |              |              |
| 1380: 39   | 4 36 1 40 4 37 0     | 1315.0924900 | 1315.0920119 |
| 0.0004781  | -0.0004000 0.0000000 |              |              |
| 1381: 38   | 4 35 1 39 4 36 0     | 1315.3518700 | 1315.3519898 |
| -0.0001198 | -0.0004000 0.0000000 |              |              |
| 1382: 31   | 4 28 1 32 4 29 0     | 1317.1718500 | 1317.1709894 |
| 0.0008606  | -0.0004000 0.0000000 |              |              |
| 1383: 30   | 4 27 1 31 4 28 0     | 1317.4306600 | 1317.4305689 |
| 0.0000911  | -0.0004000 0.0000000 |              |              |
| 1384: 29   | 4 26 1 30 4 27 0     | 1317.6899200 | 1317.6900437 |
| -0.0001237 | -0.0004000 0.0000000 |              |              |
| 1385: 28   | 4 25 1 29 4 26 0     | 1317.9494200 | 1317.9494039 |
| 0.0000161  | -0.0004000 0.0000000 |              |              |
| 1386: 27   | 4 24 1 28 4 25 0     | 1318.2083000 | 1318.2086403 |
| -0.0003403 | -0.0004000 0.0000000 |              |              |
| 1387: 20   | 4 17 1 21 4 18 0     | 1320.0189600 | 1320.0192416 |
| -0.0002816 | -0.0004000 0.0000000 |              |              |
| 1388: 19   | 4 16 1 20 4 17 0     | 1320.2771100 | 1320.2772607 |
| -0.0001507 | -0.0004000 0.0000000 |              |              |
| 1389: 18   | 4 15 1 19 4 16 0     | 1320.5350400 | 1320.5351113 |
| -0.0000713 | -0.0004000 0.0000000 |              |              |
| 1390: 17   | 4 14 1 18 4 15 0     | 1320.7928300 | 1320.7927921 |
| 0.0000379  | -0.0004000 0.0000000 |              |              |
| 1391: 16   | 4 13 1 17 4 14 0     | 1321.0501100 | 1321.0503023 |
| -0.0001923 | -0.0004000 0.0000000 |              |              |
| 1392: 15   | 4 12 1 16 4 13 0     | 1321.3077000 | 1321.3076419 |
| 0.0000581  | -0.0004000 0.0000000 |              |              |
| 1393: 14   | 4 11 1 15 4 12 0     | 1321.5646000 | 1321.5648109 |
| -0.0002109 | -0.0004000 0.0000000 |              |              |
| 1394: 13   | 4 10 1 14 4 11 0     | 1321.8214500 | 1321.8218102 |
| -0.0003602 | -0.0004000 0.0000000 |              |              |
| 1395: 12   | 4 9 1 13 4 10 0      | 1322.0782700 | 1322.0786408 |

|            |            |                  |              |              |
|------------|------------|------------------|--------------|--------------|
| -0.0003708 | -0.0004000 | 0.0000000        |              |              |
| 1396:      | 10         | 4 7 1 11 4 8 0   | 1322.5916900 | 1322.5918019 |
| -0.0001119 | -0.0004000 | 0.0000000        |              |              |
| 1397:      | 8          | 4 5 1 9 4 6 0    | 1323.1043100 | 1323.1043088 |
| 0.0000012  | -0.0004000 | 0.0000000        |              |              |
| 1398:      | 7          | 4 4 1 8 4 5 0    | 1323.3605500 | 1323.3603226 |
| 0.0002274  | -0.0004000 | 0.0000000        |              |              |
| 1399:      | 6          | 4 3 1 7 4 4 0    | 1323.6160100 | 1323.6161800 |
| -0.0001700 | -0.0004000 | 0.0000000        |              |              |
| 1400:      | 5          | 4 2 1 6 4 3 0    | 1323.8719100 | 1323.8718838 |
| 0.0000262  | -0.0004000 | 0.0000000        |              |              |
| 1401:      | 4          | 4 1 1 5 4 2 0    | 1324.1279400 | 1324.1274368 |
| 0.0005032  | -0.0004000 | 0.0000000        |              |              |
| 1402:      | 5          | 4 2 1 4 4 1 0    | 1326.6752500 | 1326.6754046 |
| -0.0001546 | -0.0004000 | 0.0000000        |              |              |
| 1403:      | 6          | 4 3 1 5 4 2 0    | 1326.9295200 | 1326.9295258 |
| -0.0000058 | -0.0004000 | 0.0000000        |              |              |
| 1404:      | 7          | 4 4 1 6 4 3 0    | 1327.1835200 | 1327.1835404 |
| -0.0000204 | -0.0004000 | 0.0000000        |              |              |
| 1405:      | 8          | 4 5 1 7 4 4 0    | 1327.4369400 | 1327.4374524 |
| -0.0005124 | -0.0004000 | 0.0000000        |              |              |
| 1406:      | 9          | 4 6 1 8 4 5 0    | 1327.6910900 | 1327.6912664 |
| -0.0001764 | -0.0004000 | 0.0000000        |              |              |
| 1407:      | 10         | 4 7 1 9 4 6 0    | 1327.9448900 | 1327.9449867 |
| -0.0000967 | -0.0004000 | 0.0000000        |              |              |
| 1408:      | 11         | 4 8 1 10 4 7 0   | 1328.1985800 | 1328.1986178 |
| -0.0000378 | -0.0004000 | 0.0000000        |              |              |
| 1409:      | 12         | 4 9 1 11 4 8 0   | 1328.4515000 | 1328.4521640 |
| -0.0006640 | -0.0004000 | 0.0000000        |              |              |
| 1410:      | 13         | 4 10 1 12 4 9 0  | 1328.7050500 | 1328.7056298 |
| -0.0005798 | -0.0004000 | 0.0000000        |              |              |
| 1411:      | 14         | 4 11 1 13 4 10 0 | 1328.9589500 | 1328.9590194 |
| -0.0000694 | -0.0004000 | 0.0000000        |              |              |
| 1412:      | 16         | 4 13 1 15 4 12 0 | 1329.4658000 | 1329.4655861 |
| 0.0002139  | -0.0004000 | 0.0000000        |              |              |
| 1413:      | 17         | 4 14 1 16 4 13 0 | 1329.7187500 | 1329.7187708 |
| -0.0000208 | -0.0004000 | 0.0000000        |              |              |
| 1414:      | 18         | 4 15 1 17 4 14 0 | 1329.9719600 | 1329.9718940 |
| 0.0000660  | -0.0004000 | 0.0000000        |              |              |
| 1415:      | 19         | 4 16 1 18 4 15 0 | 1330.2248800 | 1330.2249587 |
| -0.0000787 | -0.0004000 | 0.0000000        |              |              |
| 1416:      | 20         | 4 17 1 19 4 16 0 | 1330.4779200 | 1330.4779671 |
| -0.0000471 | -0.0004000 | 0.0000000        |              |              |
| 1417:      | 21         | 4 18 1 20 4 17 0 | 1330.7310600 | 1330.7309206 |
| 0.0001394  | -0.0004000 | 0.0000000        |              |              |
| 1418:      | 29         | 4 26 1 28 4 25 0 | 1332.7530200 | 1332.7524604 |
| 0.0005596  | -0.0004000 | 0.0000000        |              |              |
| 1419:      | 30         | 4 27 1 29 4 26 0 | 1333.0048400 | 1333.0048273 |
| 0.0000127  | -0.0004000 | 0.0000000        |              |              |
| 1420:      | 31         | 4 28 1 30 4 27 0 | 1333.2569900 | 1333.2570941 |
| -0.0001041 | -0.0004000 | 0.0000000        |              |              |
| 1421:      | 32         | 4 29 1 31 4 28 0 | 1333.5093800 | 1333.5092479 |
| 0.0001321  | -0.0004000 | 0.0000000        |              |              |
| 1422:      | 34         | 4 31 1 33 4 30 0 | 1334.0139400 | 1334.0131556 |
| 0.0007844  | -0.0004000 | 0.0000000        |              |              |
| 1423:      | 35         | 4 32 1 34 4 31 0 | 1334.2653100 | 1334.2648746 |
| 0.0004354  | -0.0004000 | 0.0000000        |              |              |
| 1424:      | 36         | 4 33 1 35 4 32 0 | 1334.5161000 | 1334.5164110 |
| -0.0003110 | -0.0004000 | 0.0000000        |              |              |
| 1425:      | 37         | 4 34 1 36 4 33 0 | 1334.7681900 | 1334.7677430 |
| 0.0004470  | -0.0004000 | 0.0000000        |              |              |
| 1426:      | 38         | 4 35 1 37 4 34 0 | 1335.0187100 | 1335.0188472 |
| -0.0001372 | -0.0004000 | 0.0000000        |              |              |
| 1427:      | 39         | 4 36 1 38 4 35 0 | 1335.2697400 | 1335.2696989 |
| 0.0000411  | -0.0004000 | 0.0000000        |              |              |

|            |                      |              |              |
|------------|----------------------|--------------|--------------|
| 1428: 40   | 4 37 1 39 4 36 0     | 1335.5196100 | 1335.5202720 |
| -0.0006620 | -0.0004000 0.0000000 |              |              |
| 1429: 42   | 4 39 1 41 4 38 0     | 1336.0204200 | 1336.0204727 |
| -0.0000527 | -0.0004000 0.0000000 |              |              |
| 1430: 43   | 4 40 1 42 4 39 0     | 1336.2700900 | 1336.2700431 |
| 0.0000469  | -0.0004000 0.0000000 |              |              |
| 1431: 45   | 4 42 1 44 4 41 0     | 1336.7680800 | 1336.7679770 |
| 0.0001030  | -0.0004000 0.0000000 |              |              |
| 1432: 46   | 4 43 1 45 4 42 0     | 1337.0162500 | 1337.0162806 |
| -0.0000306 | -0.0004000 0.0000000 |              |              |
| 1433: 47   | 4 44 1 46 4 43 0     | 1337.2631800 | 1337.2641020 |
| -0.0009220 | -0.0004000 0.0000000 |              |              |
| 1434: 48   | 4 45 1 47 4 44 0     | 1337.5116300 | 1337.5114118 |
| 0.0002182  | -0.0004000 0.0000000 |              |              |
| 1435: 49   | 4 46 1 48 4 45 0     | 1337.7586600 | 1337.7581808 |
| 0.0004792  | -0.0004000 0.0000000 |              |              |
| 1436: 50   | 4 47 1 49 4 46 0     | 1338.0045300 | 1338.0043806 |
| 0.0001494  | -0.0004000 0.0000000 |              |              |
| 1437: 51   | 4 48 1 50 4 47 0     | 1338.2500700 | 1338.2499837 |
| 0.0000863  | -0.0004000 0.0000000 |              |              |
| 1438: 53   | 4 50 1 52 4 49 0     | 1338.7393100 | 1338.7392952 |
| 0.0000148  | -0.0004000 0.0000000 |              |              |
| 1439: 54   | 4 51 1 53 4 50 0     | 1338.9823600 | 1338.9829544 |
| -0.0005944 | -0.0004000 0.0000000 |              |              |
| 1440: 56   | 4 53 1 55 4 52 0     | 1339.4682200 | 1339.4681684 |
| 0.0000516  | -0.0004000 0.0000000 |              |              |
| 1441: 57   | 4 54 1 56 4 53 0     | 1339.7093000 | 1339.7096833 |
| -0.0003833 | -0.0004000 0.0000000 |              |              |
| 1442: 58   | 4 55 1 57 4 54 0     | 1339.9503300 | 1339.9504467 |
| -0.0001167 | -0.0004000 0.0000000 |              |              |
| 1443: 59   | 4 56 1 58 4 55 0     | 1340.1904600 | 1340.1904433 |
| 0.0000167  | -0.0004000 0.0000000 |              |              |
| 1444: 60   | 4 57 1 59 4 56 0     | 1340.4294100 | 1340.4296597 |
| -0.0002497 | -0.0004000 0.0000000 |              |              |
| 1445: 62   | 4 59 1 61 4 58 0     | 1340.9062000 | 1340.9057091 |
| 0.0004909  | -0.0004000 0.0000000 |              |              |
| 1446: 63   | 4 60 1 62 4 59 0     | 1341.1426700 | 1341.1425256 |
| 0.0001444  | -0.0004000 0.0000000 |              |              |
| 1447: 64   | 4 61 1 63 4 60 0     | 1341.3784100 | 1341.3785293 |
| -0.0001193 | -0.0004000 0.0000000 |              |              |
| 1448: 65   | 4 62 1 64 4 61 0     | 1341.6132900 | 1341.6137170 |
| -0.0004270 | -0.0004000 0.0000000 |              |              |
| 1449: 66   | 4 63 1 65 4 62 0     | 1341.8476800 | 1341.8480878 |
| -0.0004078 | -0.0004000 0.0000000 |              |              |
| 1450: 67   | 4 64 1 66 4 63 0     | 1342.0816500 | 1342.0816428 |
| 0.0000072  | -0.0004000 0.0000000 |              |              |
| 1451: 68   | 4 65 1 67 4 64 0     | 1342.3151900 | 1342.3143848 |
| 0.0008052  | -0.0004000 0.0000000 |              |              |
| 1452: 69   | 4 66 1 68 4 65 0     | 1342.5466000 | 1342.5463188 |
| 0.0002812  | -0.0004000 0.0000000 |              |              |
| 1453: 72   | 4 69 1 71 4 68 0     | 1343.2365700 | 1343.2373466 |
| -0.0007766 | -0.0004000 0.0000000 |              |              |
| 1454: 73   | 4 70 1 72 4 69 0     | 1343.4660400 | 1343.4661304 |
| -0.0000904 | -0.0004000 0.0000000 |              |              |
| 1455: 74   | 4 71 1 73 4 70 0     | 1343.6944500 | 1343.6941546 |
| 0.0002954  | -0.0004000 0.0000000 |              |              |
| 1456: 76   | 4 73 1 75 4 72 0     | 1344.1478600 | 1344.1479795 |
| -0.0001195 | -0.0004000 0.0000000 |              |              |
| 1457: 77   | 4 74 1 76 4 73 0     | 1344.3749500 | 1344.3738103 |
| 0.0011397  | -0.0004000 0.0000000 |              |              |
| 1458: 79   | 4 76 1 78 4 75 0     | 1344.8234000 | 1344.8233887 |
| 0.0000113  | -0.0004000 0.0000000 |              |              |
| 1459: 80   | 4 77 1 79 4 76 0     | 1345.0477300 | 1345.0471698 |
| 0.0005602  | -0.0004000 0.0000000 |              |              |
| 1460: 81   | 4 78 1 80 4 77 0     | 1345.2707800 | 1345.2703014 |

|            |            |           |              |              |
|------------|------------|-----------|--------------|--------------|
| 0.0004786  | -0.0004000 | 0.0000000 |              |              |
| 1461: 82   | 4 79       | 1 81      | 4 78         | 0            |
| -0.0001508 | -0.0004000 | 0.0000000 | 1345.4926500 | 1345.4928008 |
| 1462: 83   | 4 80       | 1 82      | 4 79         | 0            |
| -0.0007848 | -0.0004000 | 0.0000000 | 1345.7139000 | 1345.7146848 |
| 1463: 84   | 4 81       | 1 83      | 4 80         | 0            |
| -0.0006903 | -0.0004000 | 0.0000000 | 1345.9352800 | 1345.9359703 |
| 1464: 85   | 4 82       | 1 84      | 4 81         | 0            |
| -0.0004037 | -0.0004000 | 0.0000000 | 1346.1562700 | 1346.1566737 |
| 1465: 86   | 4 83       | 1 85      | 4 82         | 0            |
| -0.0008509 | -0.0004000 | 0.0000000 | 1346.3759600 | 1346.3768109 |
| 1466: 73   | 5 68       | 1 74      | 5 69         | 0            |
| 0.0003692  | -0.0004000 | 0.0000000 | 1305.9999300 | 1305.9995608 |
| 1467: 72   | 5 67       | 1 73      | 5 68         | 0            |
| 0.0002679  | -0.0004000 | 0.0000000 | 1306.2659000 | 1306.2656321 |
| 1468: 69   | 5 64       | 1 70      | 5 65         | 0            |
| 0.0002959  | -0.0004000 | 0.0000000 | 1307.0658500 | 1307.0655541 |
| 1469: 68   | 5 63       | 1 69      | 5 64         | 0            |
| -0.0003150 | -0.0004000 | 0.0000000 | 1307.3322900 | 1307.3326050 |
| 1470: 67   | 5 62       | 1 68      | 5 63         | 0            |
| 0.0002168  | -0.0004000 | 0.0000000 | 1307.5999900 | 1307.5997732 |
| 1471: 66   | 5 61       | 1 67      | 5 62         | 0            |
| -0.0010734 | -0.0004000 | 0.0000000 | 1307.8659300 | 1307.8670034 |
| 1472: 65   | 5 60       | 1 66      | 5 61         | 0            |
| -0.0000309 | -0.0004000 | 0.0000000 | 1308.1342100 | 1308.1342409 |
| 1473: 64   | 5 59       | 1 65      | 5 60         | 0            |
| 0.0004178  | -0.0004000 | 0.0000000 | 1308.4018500 | 1308.4014322 |
| 1474: 63   | 5 58       | 1 64      | 5 59         | 0            |
| 0.0005732  | -0.0004000 | 0.0000000 | 1308.6691000 | 1308.6685268 |
| 1475: 61   | 5 56       | 1 62      | 5 57         | 0            |
| -0.0003755 | -0.0004000 | 0.0000000 | 1309.2018700 | 1309.2022455 |
| 1476: 60   | 5 55       | 1 61      | 5 56         | 0            |
| -0.0001522 | -0.0004000 | 0.0000000 | 1309.4686400 | 1309.4687922 |
| 1477: 59   | 5 54       | 1 60      | 5 55         | 0            |
| -0.0007285 | -0.0004000 | 0.0000000 | 1309.7343600 | 1309.7350885 |
| 1478: 58   | 5 53       | 1 59      | 5 54         | 0            |
| -0.0002604 | -0.0004000 | 0.0000000 | 1310.0008500 | 1310.0011104 |
| 1479: 55   | 5 50       | 1 56      | 5 51         | 0            |
| -0.0010349 | -0.0004000 | 0.0000000 | 1310.7963400 | 1310.7973749 |
| 1480: 54   | 5 49       | 1 55      | 5 50         | 0            |
| -0.0008098 | -0.0004000 | 0.0000000 | 1311.0613600 | 1311.0621698 |
| 1481: 52   | 5 47       | 1 53      | 5 48         | 0            |
| 0.0003748  | -0.0004000 | 0.0000000 | 1311.5911900 | 1311.5908152 |
| 1482: 51   | 5 46       | 1 52      | 5 47         | 0            |
| -0.0002451 | -0.0004000 | 0.0000000 | 1311.8544300 | 1311.8546751 |
| 1483: 50   | 5 45       | 1 51      | 5 46         | 0            |
| 0.0000037  | -0.0004000 | 0.0000000 | 1312.1182400 | 1312.1182363 |
| 1484: 49   | 5 44       | 1 50      | 5 45         | 0            |
| -0.0002379 | -0.0004000 | 0.0000000 | 1312.3812700 | 1312.3815079 |
| 1485: 48   | 5 43       | 1 49      | 5 44         | 0            |
| -0.0005397 | -0.0004000 | 0.0000000 | 1312.6439600 | 1312.6444997 |
| 1486: 47   | 5 42       | 1 48      | 5 43         | 0            |
| 0.0000576  | -0.0004000 | 0.0000000 | 1312.9072800 | 1312.9072224 |
| 1487: 46   | 5 41       | 1 47      | 5 42         | 0            |
| 0.0000336  | -0.0004000 | 0.0000000 | 1313.1697200 | 1313.1696864 |
| 1488: 45   | 5 40       | 1 46      | 5 41         | 0            |
| -0.0000923 | -0.0004000 | 0.0000000 | 1313.4318100 | 1313.4319023 |
| 1489: 44   | 5 39       | 1 45      | 5 40         | 0            |
| -0.0000704 | -0.0004000 | 0.0000000 | 1313.6938100 | 1313.6938804 |
| 1490: 43   | 5 38       | 1 44      | 5 39         | 0            |
| -0.0004103 | -0.0004000 | 0.0000000 | 1313.9552200 | 1313.9556303 |
| 1491: 42   | 5 37       | 1 43      | 5 38         | 0            |
| 0.0000087  | -0.0004000 | 0.0000000 | 1314.2171700 | 1314.2171613 |
| 1492: 41   | 5 36       | 1 42      | 5 37         | 0            |
| 0.0010180  | -0.0004000 | 0.0000000 | 1314.4795000 | 1314.4784820 |

|                                 |              |              |
|---------------------------------|--------------|--------------|
| 1493: 33 5 28 1 34 5 29 0       | 1316.5625900 | 1316.5622748 |
| 0.0003152 -0.0004000 0.0000000  |              |              |
| 1494: 32 5 27 1 33 5 28 0       | 1316.8220500 | 1316.8219760 |
| 0.0000740 -0.0004000 0.0000000  |              |              |
| 1495: 31 5 26 1 32 5 27 0       | 1317.0815300 | 1317.0815166 |
| 0.0000134 -0.0004000 0.0000000  |              |              |
| 1496: 30 5 25 1 31 5 26 0       | 1317.3411400 | 1317.3408989 |
| 0.0002411 -0.0004000 0.0000000  |              |              |
| 1497: 29 5 24 1 30 5 25 0       | 1317.6005200 | 1317.6001245 |
| 0.0003955 -0.0004000 0.0000000  |              |              |
| 1498: 28 5 23 1 29 5 24 0       | 1317.8596600 | 1317.8591950 |
| 0.0004650 -0.0004000 0.0000000  |              |              |
| 1499: 26 5 21 1 27 5 22 0       | 1318.3776200 | 1318.3768755 |
| 0.0007445 -0.0004000 0.0000000  |              |              |
| 1500: 25 5 20 1 26 5 21 0       | 1318.6359500 | 1318.6354874 |
| 0.0004626 -0.0004000 0.0000000  |              |              |
| 1501: 24 5 19 1 25 5 20 0       | 1318.8939400 | 1318.8939479 |
| -0.0000079 -0.0004000 0.0000000 |              |              |
| 1502: 23 5 18 1 24 5 19 0       | 1319.1523000 | 1319.1522578 |
| 0.0000422 -0.0004000 0.0000000  |              |              |
| 1503: 21 5 16 1 22 5 17 0       | 1319.6683700 | 1319.6684275 |
| -0.0000575 -0.0004000 0.0000000 |              |              |
| 1504: 20 5 15 1 21 5 16 0       | 1319.9264900 | 1319.9262881 |
| 0.0002019 -0.0004000 0.0000000  |              |              |
| 1505: 19 5 14 1 20 5 15 0       | 1320.1843400 | 1320.1839998 |
| 0.0003402 -0.0004000 0.0000000  |              |              |
| 1506: 17 5 12 1 18 5 13 0       | 1320.6989100 | 1320.6989780 |
| -0.0000680 -0.0004000 0.0000000 |              |              |
| 1507: 16 5 11 1 17 5 12 0       | 1320.9560100 | 1320.9562452 |
| -0.0002352 -0.0004000 0.0000000 |              |              |
| 1508: 14 5 9 1 15 5 10 0        | 1321.4703500 | 1321.4703382 |
| 0.0000118 -0.0004000 0.0000000  |              |              |
| 1509: 9 5 4 1 10 5 5 0          | 1322.7534000 | 1322.7530221 |
| 0.0003779 -0.0004000 0.0000000  |              |              |
| 1510: 8 5 3 1 9 5 4 0           | 1323.0091700 | 1323.0091275 |
| 0.0000425 -0.0004000 0.0000000  |              |              |
| 1511: 7 5 2 1 8 5 3 0           | 1323.2651900 | 1323.2650911 |
| 0.0000989 -0.0004000 0.0000000  |              |              |
| 1512: 6 5 1 1 7 5 2 0           | 1323.5210500 | 1323.5209138 |
| 0.0001362 -0.0004000 0.0000000  |              |              |
| 1513: 7 5 2 1 6 5 1 0           | 1327.0886100 | 1327.0883541 |
| 0.0002559 -0.0004000 0.0000000  |              |              |
| 1514: 8 5 3 1 7 5 2 0           | 1327.3424000 | 1327.3422278 |
| 0.0001722 -0.0004000 0.0000000  |              |              |
| 1515: 9 5 4 1 8 5 3 0           | 1327.5963200 | 1327.5959854 |
| 0.0003346 -0.0004000 0.0000000  |              |              |
| 1516: 10 5 5 1 9 5 4 0          | 1327.8497200 | 1327.8496290 |
| 0.0000910 -0.0004000 0.0000000  |              |              |
| 1517: 22 5 17 1 21 5 16 0       | 1330.8856300 | 1330.8853070 |
| 0.0003230 -0.0004000 0.0000000  |              |              |
| 1518: 23 5 18 1 22 5 17 0       | 1331.1377100 | 1331.1376897 |
| 0.0000203 -0.0004000 0.0000000  |              |              |
| 1519: 24 5 19 1 23 5 18 0       | 1331.3896100 | 1331.3899960 |
| -0.0003860 -0.0004000 0.0000000 |              |              |
| 1520: 25 5 20 1 24 5 19 0       | 1331.6424800 | 1331.6422296 |
| 0.0002504 -0.0004000 0.0000000  |              |              |
| 1521: 27 5 22 1 26 5 21 0       | 1332.1463800 | 1332.1464950 |
| -0.0001150 -0.0004000 0.0000000 |              |              |
| 1522: 28 5 23 1 27 5 22 0       | 1332.3982300 | 1332.3985360 |
| -0.0003060 -0.0004000 0.0000000 |              |              |
| 1523: 30 5 25 1 29 5 24 0       | 1332.9022400 | 1332.9024605 |
| -0.0002205 -0.0004000 0.0000000 |              |              |
| 1524: 31 5 26 1 30 5 25 0       | 1333.1541300 | 1333.1543562 |
| -0.0002262 -0.0004000 0.0000000 |              |              |
| 1525: 32 5 27 1 31 5 26 0       | 1333.4056300 | 1333.4062166 |



|            |            |           |              |              |
|------------|------------|-----------|--------------|--------------|
| -0.0005866 | -0.0004000 | 0.0000000 |              |              |
| 1526: 39   | 5 34       | 1 38      | 5 33         | 0            |
| -0.0003418 | -0.0004000 | 0.0000000 | 1335.1687000 | 1335.1690418 |
| 1527: 40   | 5 35       | 1 39      | 5 34         | 0            |
| -0.0004261 | -0.0004000 | 0.0000000 | 1335.4205700 | 1335.4209961 |
| 1528: 41   | 5 36       | 1 40      | 5 35         | 0            |
| -0.0001404 | -0.0004000 | 0.0000000 | 1335.6728900 | 1335.6730304 |
| 1529: 42   | 5 37       | 1 41      | 5 36         | 0            |
| -0.0002359 | -0.0004000 | 0.0000000 | 1335.9249300 | 1335.9251659 |
| 1530: 44   | 5 39       | 1 43      | 5 38         | 0            |
| 0.0001524  | -0.0004000 | 0.0000000 | 1336.4299900 | 1336.4298376 |
| 1531: 45   | 5 40       | 1 44      | 5 39         | 0            |
| -0.0001282 | -0.0004000 | 0.0000000 | 1336.6823000 | 1336.6824282 |
| 1532: 46   | 5 41       | 1 45      | 5 40         | 0            |
| 0.0000908  | -0.0004000 | 0.0000000 | 1336.9353200 | 1336.9352292 |
| 1533: 47   | 5 42       | 1 46      | 5 41         | 0            |
| 0.0005358  | -0.0004000 | 0.0000000 | 1337.1888100 | 1337.1882742 |
| 1534: 48   | 5 43       | 1 47      | 5 42         | 0            |
| 0.0000907  | -0.0004000 | 0.0000000 | 1337.4416900 | 1337.4415993 |
| 1535: 49   | 5 44       | 1 48      | 5 43         | 0            |
| -0.0000327 | -0.0004000 | 0.0000000 | 1337.6952100 | 1337.6952427 |
| 1536: 50   | 5 45       | 1 49      | 5 44         | 0            |
| 0.0001552  | -0.0004000 | 0.0000000 | 1337.9494000 | 1337.9492448 |
| 1537: 51   | 5 46       | 1 50      | 5 45         | 0            |
| 0.0000826  | -0.0004000 | 0.0000000 | 1338.2037300 | 1338.2036474 |
| 1538: 53   | 5 48       | 1 52      | 5 47         | 0            |
| 0.0000554  | -0.0004000 | 0.0000000 | 1338.7138800 | 1338.7138246 |
| 1539: 54   | 5 49       | 1 53      | 5 48         | 0            |
| -0.0000333 | -0.0004000 | 0.0000000 | 1338.9696500 | 1338.9696833 |
| 1540: 55   | 5 50       | 1 54      | 5 49         | 0            |
| -0.0001684 | -0.0004000 | 0.0000000 | 1339.2259400 | 1339.2261084 |
| 1541: 56   | 5 51       | 1 55      | 5 50         | 0            |
| 0.0004649  | -0.0004000 | 0.0000000 | 1339.4836000 | 1339.4831351 |
| 1542: 57   | 5 52       | 1 56      | 5 51         | 0            |
| 0.0001673  | -0.0004000 | 0.0000000 | 1339.7409600 | 1339.7407927 |
| 1543: 58   | 5 53       | 1 57      | 5 52         | 0            |
| 0.0000074  | -0.0004000 | 0.0000000 | 1339.9991100 | 1339.9991026 |
| 1544: 59   | 5 54       | 1 58      | 5 53         | 0            |
| -0.0002863 | -0.0004000 | 0.0000000 | 1340.2577900 | 1340.2580763 |
| 1545: 63   | 5 58       | 1 62      | 5 57         | 0            |
| -0.0003156 | -0.0004000 | 0.0000000 | 1341.3000500 | 1341.3003656 |
| 1546: 64   | 5 59       | 1 63      | 5 58         | 0            |
| -0.0002710 | -0.0004000 | 0.0000000 | 1341.5620600 | 1341.5623310 |
| 1547: 65   | 5 60       | 1 64      | 5 59         | 0            |
| -0.0004765 | -0.0004000 | 0.0000000 | 1341.8242300 | 1341.8247065 |
| 1548: 66   | 5 61       | 1 65      | 5 60         | 0            |
| -0.0007148 | -0.0004000 | 0.0000000 | 1342.0866700 | 1342.0873848 |
| 1549: 67   | 5 62       | 1 66      | 5 61         | 0            |
| 0.0000388  | -0.0004000 | 0.0000000 | 1342.3502800 | 1342.3502412 |
| 1550: 68   | 5 63       | 1 67      | 5 62         | 0            |
| 0.0002051  | -0.0004000 | 0.0000000 | 1342.6133400 | 1342.6131349 |
| 1551: 69   | 5 64       | 1 68      | 5 63         | 0            |
| 0.0002075  | -0.0004000 | 0.0000000 | 1342.8761200 | 1342.8759125 |
| 1552: 70   | 5 65       | 1 69      | 5 64         | 0            |
| -0.0004707 | -0.0004000 | 0.0000000 | 1343.1379400 | 1343.1384107 |
| 1553: 71   | 5 66       | 1 70      | 5 65         | 0            |
| 0.0002196  | -0.0004000 | 0.0000000 | 1343.4006800 | 1343.4004604 |
| 1554: 72   | 5 67       | 1 71      | 5 66         | 0            |
| 0.0002497  | -0.0004000 | 0.0000000 | 1343.6621400 | 1343.6618903 |
| 1555: 73   | 5 68       | 1 72      | 5 67         | 0            |
| 0.0003895  | -0.0004000 | 0.0000000 | 1343.9229200 | 1343.9225305 |
| 1556: 74   | 5 69       | 1 73      | 5 68         | 0            |
| 0.0000341  | -0.0004000 | 0.0000000 | 1344.1822500 | 1344.1822159 |
| 1557: 75   | 5 70       | 1 74      | 5 69         | 0            |
| 0.0003815  | -0.0004000 | 0.0000000 | 1344.4411700 | 1344.4407885 |

|                                 |              |              |
|---------------------------------|--------------|--------------|
| 1558: 76 5 71 1 75 5 70 0       | 1344.6984100 | 1344.6980998 |
| 0.0003102 -0.0004000 0.0000000  |              |              |
| 1559: 77 5 72 1 76 5 71 0       | 1344.9547500 | 1344.9540117 |
| 0.0007383 -0.0004000 0.0000000  |              |              |
| 1560: 78 5 73 1 77 5 72 0       | 1345.2086000 | 1345.2083976 |
| 0.0002024 -0.0004000 0.0000000  |              |              |
| 1561: 79 5 74 1 78 5 73 0       | 1345.4606500 | 1345.4611422 |
| -0.0004922 -0.0004000 0.0000000 |              |              |
| 1562: 82 5 77 1 81 5 76 0       | 1346.2092000 | 1346.2085360 |
| 0.0006640 -0.0004000 0.0000000  |              |              |
| 1563: 83 5 78 1 82 5 77 0       | 1346.4528900 | 1346.4537717 |
| -0.0008817 -0.0004000 0.0000000 |              |              |
| 1564: 84 5 79 1 83 5 78 0       | 1346.6963300 | 1346.6969397 |
| -0.0006097 -0.0004000 0.0000000 |              |              |
| 1565: 85 5 80 1 84 5 79 0       | 1346.9377100 | 1346.9379794 |
| -0.0002694 -0.0004000 0.0000000 |              |              |
| 1566: 86 5 81 1 85 5 80 0       | 1347.1777600 | 1347.1768367 |
| 0.0009233 -0.0004000 0.0000000  |              |              |
| 1567: 87 5 82 1 86 5 81 0       | 1347.4124000 | 1347.4134642 |
| -0.0010642 -0.0004000 0.0000000 |              |              |
| 1568: 88 5 83 1 87 5 82 0       | 1347.6476400 | 1347.6478215 |
| -0.0001815 -0.0004000 0.0000000 |              |              |
| 1569: 80 5 76 1 81 5 77 0       | 1304.3355100 | 1304.3357463 |
| -0.0002363 -0.0004000 0.0000000 |              |              |
| 1570: 79 5 75 1 80 5 76 0       | 1304.5941900 | 1304.5938704 |
| 0.0003196 -0.0004000 0.0000000  |              |              |
| 1571: 77 5 73 1 78 5 74 0       | 1305.1104700 | 1305.1104952 |
| -0.0000252 -0.0004000 0.0000000 |              |              |
| 1572: 76 5 72 1 77 5 73 0       | 1305.3689800 | 1305.3690050 |
| -0.0000250 -0.0004000 0.0000000 |              |              |
| 1573: 73 5 69 1 74 5 70 0       | 1306.1448000 | 1306.1453675 |
| -0.0005675 -0.0004000 0.0000000 |              |              |
| 1574: 72 5 68 1 73 5 69 0       | 1306.4046200 | 1306.4044405 |
| 0.0001795 -0.0004000 0.0000000  |              |              |
| 1575: 71 5 67 1 72 5 68 0       | 1306.6638700 | 1306.6636585 |
| 0.0002115 -0.0004000 0.0000000  |              |              |
| 1576: 70 5 66 1 71 5 67 0       | 1306.9226100 | 1306.9230214 |
| -0.0004114 -0.0004000 0.0000000 |              |              |
| 1577: 69 5 65 1 70 5 66 0       | 1307.1824700 | 1307.1825286 |
| -0.0000586 -0.0004000 0.0000000 |              |              |
| 1578: 68 5 64 1 69 5 65 0       | 1307.4419600 | 1307.4421785 |
| -0.0002185 -0.0004000 0.0000000 |              |              |
| 1579: 67 5 63 1 68 5 64 0       | 1307.7020500 | 1307.7019686 |
| 0.0000814 -0.0004000 0.0000000  |              |              |
| 1580: 66 5 62 1 67 5 63 0       | 1307.9616700 | 1307.9618958 |
| -0.0002258 -0.0004000 0.0000000 |              |              |
| 1581: 65 5 61 1 66 5 62 0       | 1308.2222700 | 1308.2219558 |
| 0.0003142 -0.0004000 0.0000000  |              |              |
| 1582: 63 5 59 1 64 5 60 0       | 1308.7423800 | 1308.7424539 |
| -0.0000739 -0.0004000 0.0000000 |              |              |
| 1583: 62 5 58 1 63 5 59 0       | 1309.0033000 | 1309.0028795 |
| 0.0004205 -0.0004000 0.0000000  |              |              |
| 1584: 61 5 57 1 62 5 58 0       | 1309.2631600 | 1309.2634134 |
| -0.0002534 -0.0004000 0.0000000 |              |              |
| 1585: 60 5 56 1 61 5 57 0       | 1309.5247000 | 1309.5240476 |
| 0.0006524 -0.0004000 0.0000000  |              |              |
| 1586: 59 5 55 1 60 5 56 0       | 1309.7851100 | 1309.7847733 |
| 0.0003367 -0.0004000 0.0000000  |              |              |
| 1587: 58 5 54 1 59 5 55 0       | 1310.0461200 | 1310.0455815 |
| 0.0005385 -0.0004000 0.0000000  |              |              |
| 1588: 56 5 52 1 57 5 53 0       | 1310.5672500 | 1310.5674054 |
| -0.0001554 -0.0004000 0.0000000 |              |              |
| 1589: 55 5 51 1 56 5 52 0       | 1310.8286000 | 1310.8284006 |
| 0.0001994 -0.0004000 0.0000000  |              |              |
| 1590: 54 5 50 1 55 5 51 0       | 1311.0894200 | 1311.0894370 |

|            |            |           |              |              |
|------------|------------|-----------|--------------|--------------|
| -0.0000170 | -0.0004000 | 0.0000000 |              |              |
| 1591: 53   | 5 49       | 1 54      | 5 50         | 0            |
| 0.0001465  | -0.0004000 | 0.0000000 | 1311.3506500 | 1311.3505035 |
| 1592: 52   | 5 48       | 1 53      | 5 49         | 0            |
| -0.0006592 | -0.0004000 | 0.0000000 | 1311.6109300 | 1311.6115892 |
| 1593: 51   | 5 47       | 1 52      | 5 48         | 0            |
| -0.0003530 | -0.0004000 | 0.0000000 | 1311.8723300 | 1311.8726830 |
| 1594: 50   | 5 46       | 1 51      | 5 47         | 0            |
| 0.0000461  | -0.0004000 | 0.0000000 | 1312.1338200 | 1312.1337739 |
| 1595: 48   | 5 44       | 1 49      | 5 45         | 0            |
| -0.0000738 | -0.0004000 | 0.0000000 | 1312.6558300 | 1312.6559038 |
| 1596: 46   | 5 42       | 1 47      | 5 43         | 0            |
| 0.0002845  | -0.0004000 | 0.0000000 | 1313.1781800 | 1313.1778955 |
| 1597: 45   | 5 41       | 1 46      | 5 42         | 0            |
| -0.0002749 | -0.0004000 | 0.0000000 | 1313.4385400 | 1313.4388149 |
| 1598: 44   | 5 40       | 1 45      | 5 41         | 0            |
| 0.0001190  | -0.0004000 | 0.0000000 | 1313.6997900 | 1313.6996710 |
| 1599: 43   | 5 39       | 1 44      | 5 40         | 0            |
| -0.0000453 | -0.0004000 | 0.0000000 | 1313.9604100 | 1313.9604553 |
| 1600: 42   | 5 38       | 1 43      | 5 39         | 0            |
| 0.0001803  | -0.0004000 | 0.0000000 | 1314.2213400 | 1314.2211597 |
| 1601: 41   | 5 37       | 1 42      | 5 38         | 0            |
| 0.0000235  | -0.0004000 | 0.0000000 | 1314.4818000 | 1314.4817765 |
| 1602: 33   | 5 29       | 1 34      | 5 30         | 0            |
| -0.0002393 | -0.0004000 | 0.0000000 | 1316.5625900 | 1316.5628293 |
| 1603: 32   | 5 28       | 1 33      | 5 29         | 0            |
| -0.0003550 | -0.0004000 | 0.0000000 | 1316.8220500 | 1316.8224050 |
| 1604: 31   | 5 27       | 1 32      | 5 28         | 0            |
| -0.0003156 | -0.0004000 | 0.0000000 | 1317.0815300 | 1317.0818456 |
| 1605: 30   | 5 26       | 1 31      | 5 27         | 0            |
| -0.0000088 | -0.0004000 | 0.0000000 | 1317.3411400 | 1317.3411488 |
| 1606: 29   | 5 25       | 1 30      | 5 26         | 0            |
| 0.0002075  | -0.0004000 | 0.0000000 | 1317.6005200 | 1317.6003125 |
| 1607: 28   | 5 24       | 1 29      | 5 25         | 0            |
| 0.0003251  | -0.0004000 | 0.0000000 | 1317.8596600 | 1317.8593349 |
| 1608: 26   | 5 22       | 1 27      | 5 23         | 0            |
| 0.0006696  | -0.0004000 | 0.0000000 | 1318.3776200 | 1318.3769504 |
| 1609: 25   | 5 21       | 1 26      | 5 22         | 0            |
| 0.0004089  | -0.0004000 | 0.0000000 | 1318.6359500 | 1318.6355411 |
| 1610: 24   | 5 20       | 1 25      | 5 21         | 0            |
| -0.0000459 | -0.0004000 | 0.0000000 | 1318.8939400 | 1318.8939859 |
| 1611: 23   | 5 19       | 1 24      | 5 20         | 0            |
| 0.0000157  | -0.0004000 | 0.0000000 | 1319.1523000 | 1319.1522843 |
| 1612: 21   | 5 17       | 1 22      | 5 18         | 0            |
| -0.0000697 | -0.0004000 | 0.0000000 | 1319.6683700 | 1319.6684397 |
| 1613: 20   | 5 16       | 1 21      | 5 17         | 0            |
| 0.0001938  | -0.0004000 | 0.0000000 | 1319.9264900 | 1319.9262962 |
| 1614: 19   | 5 15       | 1 20      | 5 16         | 0            |
| 0.0003350  | -0.0004000 | 0.0000000 | 1320.1843400 | 1320.1840050 |
| 1615: 17   | 5 13       | 1 18      | 5 14         | 0            |
| -0.0000700 | -0.0004000 | 0.0000000 | 1320.6989100 | 1320.6989800 |
| 1616: 16   | 5 12       | 1 17      | 5 13         | 0            |
| -0.0002364 | -0.0004000 | 0.0000000 | 1320.9560100 | 1320.9562464 |
| 1617: 14   | 5 10       | 1 15      | 5 11         | 0            |
| 0.0000114  | -0.0004000 | 0.0000000 | 1321.4703500 | 1321.4703386 |
| 1618: 9    | 5 5        | 1 10      | 5 6          | 0            |
| 0.0003779  | -0.0004000 | 0.0000000 | 1322.7534000 | 1322.7530221 |
| 1619: 8    | 5 4        | 1 9       | 5 5          | 0            |
| 0.0000425  | -0.0004000 | 0.0000000 | 1323.0091700 | 1323.0091275 |
| 1620: 7    | 5 3        | 1 8       | 5 4          | 0            |
| 0.0000989  | -0.0004000 | 0.0000000 | 1323.2651900 | 1323.2650911 |
| 1621: 6    | 5 2        | 1 7       | 5 3          | 0            |
| 0.0001362  | -0.0004000 | 0.0000000 | 1323.5210500 | 1323.5209138 |
| 1622: 7    | 5 3        | 1 6       | 5 2          | 0            |
| 0.0002559  | -0.0004000 | 0.0000000 | 1327.0886100 | 1327.0883541 |

|            |            |           |    |   |    |   |    |   |              |              |
|------------|------------|-----------|----|---|----|---|----|---|--------------|--------------|
| 1623:      | 8          | 5         | 4  | 1 | 7  | 5 | 3  | 0 | 1327.3424000 | 1327.3422278 |
| 0.0001722  | -0.0004000 | 0.0000000 |    |   |    |   |    |   |              |              |
| 1624:      | 9          | 5         | 5  | 1 | 8  | 5 | 4  | 0 | 1327.5963200 | 1327.5959854 |
| 0.0003346  | -0.0004000 | 0.0000000 |    |   |    |   |    |   |              |              |
| 1625:      | 10         | 5         | 6  | 1 | 9  | 5 | 5  | 0 | 1327.8497200 | 1327.8496289 |
| 0.0000911  | -0.0004000 | 0.0000000 |    |   |    |   |    |   |              |              |
| 1626:      | 22         | 5         | 18 | 1 | 21 | 5 | 17 | 0 | 1330.8856300 | 1330.8852908 |
| 0.0003392  | -0.0004000 | 0.0000000 |    |   |    |   |    |   |              |              |
| 1627:      | 23         | 5         | 19 | 1 | 22 | 5 | 18 | 0 | 1331.1377100 | 1331.1376653 |
| 0.0000447  | -0.0004000 | 0.0000000 |    |   |    |   |    |   |              |              |
| 1628:      | 24         | 5         | 20 | 1 | 23 | 5 | 19 | 0 | 1331.3896100 | 1331.3899599 |
| -0.0003499 | -0.0004000 | 0.0000000 |    |   |    |   |    |   |              |              |
| 1629:      | 25         | 5         | 21 | 1 | 24 | 5 | 20 | 0 | 1331.6424800 | 1331.6421771 |
| 0.0003029  | -0.0004000 | 0.0000000 |    |   |    |   |    |   |              |              |
| 1630:      | 27         | 5         | 23 | 1 | 26 | 5 | 22 | 0 | 1332.1463800 | 1332.1463888 |
| -0.0000088 | -0.0004000 | 0.0000000 |    |   |    |   |    |   |              |              |
| 1631:      | 28         | 5         | 24 | 1 | 27 | 5 | 23 | 0 | 1332.3982300 | 1332.3983879 |
| -0.0001579 | -0.0004000 | 0.0000000 |    |   |    |   |    |   |              |              |
| 1632:      | 30         | 5         | 26 | 1 | 29 | 5 | 25 | 0 | 1332.9022400 | 1332.9021829 |
| 0.0000571  | -0.0004000 | 0.0000000 |    |   |    |   |    |   |              |              |
| 1633:      | 31         | 5         | 27 | 1 | 30 | 5 | 26 | 0 | 1333.1541300 | 1333.1539821 |
| 0.0001479  | -0.0004000 | 0.0000000 |    |   |    |   |    |   |              |              |
| 1634:      | 32         | 5         | 28 | 1 | 31 | 5 | 27 | 0 | 1333.4056300 | 1333.4057175 |
| -0.0000875 | -0.0004000 | 0.0000000 |    |   |    |   |    |   |              |              |
| 1635:      | 39         | 5         | 35 | 1 | 38 | 5 | 34 | 0 | 1335.1658700 | 1335.1660774 |
| -0.0002074 | -0.0004000 | 0.0000000 |    |   |    |   |    |   |              |              |
| 1636:      | 40         | 5         | 36 | 1 | 39 | 5 | 35 | 0 | 1335.4169000 | 1335.4172815 |
| -0.0003815 | -0.0004000 | 0.0000000 |    |   |    |   |    |   |              |              |
| 1637:      | 41         | 5         | 37 | 1 | 40 | 5 | 36 | 0 | 1335.6685100 | 1335.6684051 |
| 0.0001049  | -0.0004000 | 0.0000000 |    |   |    |   |    |   |              |              |
| 1638:      | 42         | 5         | 38 | 1 | 41 | 5 | 37 | 0 | 1335.9192700 | 1335.9194416 |
| -0.0001716 | -0.0004000 | 0.0000000 |    |   |    |   |    |   |              |              |
| 1639:      | 43         | 5         | 39 | 1 | 42 | 5 | 38 | 0 | 1336.1703100 | 1336.1703829 |
| -0.0000729 | -0.0004000 | 0.0000000 |    |   |    |   |    |   |              |              |
| 1640:      | 44         | 5         | 40 | 1 | 43 | 5 | 39 | 0 | 1336.4214300 | 1336.4212200 |
| 0.0002100  | -0.0004000 | 0.0000000 |    |   |    |   |    |   |              |              |
| 1641:      | 47         | 5         | 43 | 1 | 46 | 5 | 42 | 0 | 1337.1726500 | 1337.1729911 |
| -0.0003411 | -0.0004000 | 0.0000000 |    |   |    |   |    |   |              |              |
| 1642:      | 48         | 5         | 44 | 1 | 47 | 5 | 43 | 0 | 1337.4233900 | 1337.4232887 |
| 0.0001013  | -0.0004000 | 0.0000000 |    |   |    |   |    |   |              |              |
| 1643:      | 49         | 5         | 45 | 1 | 48 | 5 | 44 | 0 | 1337.6734100 | 1337.6734130 |
| -0.0000030 | -0.0004000 | 0.0000000 |    |   |    |   |    |   |              |              |
| 1644:      | 50         | 5         | 46 | 1 | 49 | 5 | 45 | 0 | 1337.9233400 | 1337.9233453 |
| -0.0000053 | -0.0004000 | 0.0000000 |    |   |    |   |    |   |              |              |
| 1645:      | 51         | 5         | 47 | 1 | 50 | 5 | 46 | 0 | 1338.1728700 | 1338.1730654 |
| -0.0001954 | -0.0004000 | 0.0000000 |    |   |    |   |    |   |              |              |
| 1646:      | 52         | 5         | 48 | 1 | 51 | 5 | 47 | 0 | 1338.4225000 | 1338.4225514 |
| -0.0000514 | -0.0004000 | 0.0000000 |    |   |    |   |    |   |              |              |
| 1647:      | 53         | 5         | 49 | 1 | 52 | 5 | 48 | 0 | 1338.6720200 | 1338.6717801 |
| 0.0002399  | -0.0004000 | 0.0000000 |    |   |    |   |    |   |              |              |
| 1648:      | 54         | 5         | 50 | 1 | 53 | 5 | 49 | 0 | 1338.9205600 | 1338.9207266 |
| -0.0001666 | -0.0004000 | 0.0000000 |    |   |    |   |    |   |              |              |
| 1649:      | 55         | 5         | 51 | 1 | 54 | 5 | 50 | 0 | 1339.1692400 | 1339.1693649 |
| -0.0001249 | -0.0004000 | 0.0000000 |    |   |    |   |    |   |              |              |
| 1650:      | 56         | 5         | 52 | 1 | 55 | 5 | 51 | 0 | 1339.4176400 | 1339.4176678 |
| -0.0000278 | -0.0004000 | 0.0000000 |    |   |    |   |    |   |              |              |
| 1651:      | 57         | 5         | 53 | 1 | 56 | 5 | 52 | 0 | 1339.6658300 | 1339.6656069 |
| 0.0002231  | -0.0004000 | 0.0000000 |    |   |    |   |    |   |              |              |
| 1652:      | 58         | 5         | 54 | 1 | 57 | 5 | 53 | 0 | 1339.9128500 | 1339.9131531 |
| -0.0003031 | -0.0004000 | 0.0000000 |    |   |    |   |    |   |              |              |
| 1653:      | 59         | 5         | 55 | 1 | 58 | 5 | 54 | 0 | 1340.1604400 | 1340.1602764 |
| 0.0001636  | -0.0004000 | 0.0000000 |    |   |    |   |    |   |              |              |
| 1654:      | 60         | 5         | 56 | 1 | 59 | 5 | 55 | 0 | 1340.4067600 | 1340.4069465 |
| -0.0001865 | -0.0004000 | 0.0000000 |    |   |    |   |    |   |              |              |
| 1655:      | 61         | 5         | 57 | 1 | 60 | 5 | 56 | 0 | 1340.6533600 | 1340.6531325 |

|            |            |           |              |              |
|------------|------------|-----------|--------------|--------------|
| 0.0002275  | -0.0004000 | 0.0000000 |              |              |
| 1656: 62   | 5 58       | 1 61      | 5 57         | 0            |
| -0.0003736 | -0.0004000 | 0.0000000 | 1340.8984300 | 1340.8988036 |
| 1657: 63   | 5 59       | 1 62      | 5 58         | 0            |
| -0.0000090 | -0.0004000 | 0.0000000 | 1341.1439200 | 1341.1439290 |
| 1658: 64   | 5 60       | 1 63      | 5 59         | 0            |
| -0.0006881 | -0.0004000 | 0.0000000 | 1341.3877900 | 1341.3884781 |
| 1659: 65   | 5 61       | 1 64      | 5 60         | 0            |
| 0.0000091  | -0.0004000 | 0.0000000 | 1341.6324300 | 1341.6324209 |
| 1660: 66   | 5 62       | 1 65      | 5 61         | 0            |
| -0.0010379 | -0.0004000 | 0.0000000 | 1341.8746900 | 1341.8757279 |
| 1661: 67   | 5 63       | 1 66      | 5 62         | 0            |
| -0.0008707 | -0.0004000 | 0.0000000 | 1342.1175000 | 1342.1183707 |
| 1662: 69   | 5 65       | 1 68      | 5 64         | 0            |
| 0.0000651  | -0.0004000 | 0.0000000 | 1342.6016200 | 1342.6015549 |
| 1663: 70   | 5 66       | 1 69      | 5 65         | 0            |
| -0.0002851 | -0.0004000 | 0.0000000 | 1342.8417600 | 1342.8420451 |
| 1664: 73   | 5 69       | 1 72      | 5 68         | 0            |
| -0.0001923 | -0.0004000 | 0.0000000 | 1343.5586400 | 1343.5588323 |
| 1665: 74   | 5 70       | 1 73      | 5 69         | 0            |
| 0.0001164  | -0.0004000 | 0.0000000 | 1343.7962500 | 1343.7961336 |
| 1666: 75   | 5 71       | 1 74      | 5 70         | 0            |
| -0.0000722 | -0.0004000 | 0.0000000 | 1344.0325200 | 1344.0325922 |
| 1667: 76   | 5 72       | 1 75      | 5 71         | 0            |
| 0.0001260  | -0.0004000 | 0.0000000 | 1344.2683200 | 1344.2681940 |
| 1668: 77   | 5 73       | 1 76      | 5 72         | 0            |
| -0.0004168 | -0.0004000 | 0.0000000 | 1344.5025100 | 1344.5029268 |
| 1669: 78   | 5 74       | 1 77      | 5 73         | 0            |
| 0.0003396  | -0.0004000 | 0.0000000 | 1344.7371200 | 1344.7367804 |
| 1670: 79   | 5 75       | 1 78      | 5 74         | 0            |
| 0.0003632  | -0.0004000 | 0.0000000 | 1344.9701100 | 1344.9697468 |
| 1671: 80   | 5 76       | 1 79      | 5 75         | 0            |
| 0.0001299  | -0.0004000 | 0.0000000 | 1345.2019500 | 1345.2018201 |
| 1672: 81   | 5 77       | 1 80      | 5 76         | 0            |
| 0.0008333  | -0.0004000 | 0.0000000 | 1345.4338300 | 1345.4329967 |
| 1673: 82   | 5 78       | 1 81      | 5 77         | 0            |
| -0.0000347 | -0.0004000 | 0.0000000 | 1345.6632400 | 1345.6632747 |
| 1674: 80   | 6 74       | 1 81      | 6 75         | 0            |
| 0.0000416  | -0.0004000 | 0.0000000 | 1304.1195900 | 1304.1195484 |
| 1675: 79   | 6 73       | 1 80      | 6 74         | 0            |
| 0.0001925  | -0.0004000 | 0.0000000 | 1304.3856900 | 1304.3854975 |
| 1676: 78   | 6 72       | 1 79      | 6 73         | 0            |
| 0.0008820  | -0.0004000 | 0.0000000 | 1304.6522700 | 1304.6513880 |
| 1677: 72   | 6 66       | 1 73      | 6 67         | 0            |
| 0.0012865  | -0.0004000 | 0.0000000 | 1306.2453000 | 1306.2440135 |
| 1678: 70   | 6 64       | 1 71      | 6 65         | 0            |
| 0.0007441  | -0.0004000 | 0.0000000 | 1306.7741900 | 1306.7734459 |
| 1679: 69   | 6 63       | 1 70      | 6 64         | 0            |
| -0.0000150 | -0.0004000 | 0.0000000 | 1307.0378400 | 1307.0378550 |
| 1680: 68   | 6 62       | 1 69      | 6 63         | 0            |
| 0.0002719  | -0.0004000 | 0.0000000 | 1307.3023300 | 1307.3020581 |
| 1681: 67   | 6 61       | 1 68      | 6 62         | 0            |
| -0.0007165 | -0.0004000 | 0.0000000 | 1307.5653400 | 1307.5660565 |
| 1682: 65   | 6 59       | 1 66      | 6 60         | 0            |
| -0.0001530 | -0.0004000 | 0.0000000 | 1308.0933000 | 1308.0934530 |
| 1683: 61   | 6 55       | 1 62      | 6 56         | 0            |
| -0.0000270 | -0.0004000 | 0.0000000 | 1309.1459600 | 1309.1459870 |
| 1684: 60   | 6 54       | 1 61      | 6 55         | 0            |
| -0.0003745 | -0.0004000 | 0.0000000 | 1309.4083100 | 1309.4086845 |
| 1685: 58   | 6 52       | 1 59      | 6 53         | 0            |
| 0.0003011  | -0.0004000 | 0.0000000 | 1309.9339000 | 1309.9335989 |
| 1686: 44   | 6 38       | 1 45      | 6 39         | 0            |
| 0.0001698  | -0.0004000 | 0.0000000 | 1313.5929700 | 1313.5928002 |
| 1687: 43   | 6 37       | 1 44      | 6 38         | 0            |
| 0.0001672  | -0.0004000 | 0.0000000 | 1313.8534300 | 1313.8532628 |

|            |            |           |    |   |    |   |    |   |              |              |
|------------|------------|-----------|----|---|----|---|----|---|--------------|--------------|
| 1688:      | 42         | 6         | 36 | 1 | 43 | 6 | 37 | 0 | 1314.1137500 | 1314.1136098 |
| 0.0001402  | -0.0004000 | 0.0000000 |    |   |    |   |    |   |              |              |
| 1689:      | 41         | 6         | 35 | 1 | 42 | 6 | 36 | 0 | 1314.3738900 | 1314.3738411 |
| 0.0000489  | -0.0004000 | 0.0000000 |    |   |    |   |    |   |              |              |
| 1690:      | 40         | 6         | 34 | 1 | 41 | 6 | 35 | 0 | 1314.6340400 | 1314.6339565 |
| 0.0000835  | -0.0004000 | 0.0000000 |    |   |    |   |    |   |              |              |
| 1691:      | 39         | 6         | 33 | 1 | 40 | 6 | 34 | 0 | 1314.8940400 | 1314.8939559 |
| 0.0000841  | -0.0004000 | 0.0000000 |    |   |    |   |    |   |              |              |
| 1692:      | 38         | 6         | 32 | 1 | 39 | 6 | 33 | 0 | 1315.1538500 | 1315.1538386 |
| 0.0000114  | -0.0004000 | 0.0000000 |    |   |    |   |    |   |              |              |
| 1693:      | 37         | 6         | 31 | 1 | 38 | 6 | 32 | 0 | 1315.4138100 | 1315.4136043 |
| 0.0002057  | -0.0004000 | 0.0000000 |    |   |    |   |    |   |              |              |
| 1694:      | 36         | 6         | 30 | 1 | 37 | 6 | 31 | 0 | 1315.6734300 | 1315.6732523 |
| 0.0001777  | -0.0004000 | 0.0000000 |    |   |    |   |    |   |              |              |
| 1695:      | 35         | 6         | 29 | 1 | 36 | 6 | 30 | 0 | 1315.9331200 | 1315.9327820 |
| 0.0003380  | -0.0004000 | 0.0000000 |    |   |    |   |    |   |              |              |
| 1696:      | 34         | 6         | 28 | 1 | 35 | 6 | 29 | 0 | 1316.1923900 | 1316.1921926 |
| 0.0001974  | -0.0004000 | 0.0000000 |    |   |    |   |    |   |              |              |
| 1697:      | 33         | 6         | 27 | 1 | 34 | 6 | 28 | 0 | 1316.4513000 | 1316.4514834 |
| -0.0001834 | -0.0004000 | 0.0000000 |    |   |    |   |    |   |              |              |
| 1698:      | 32         | 6         | 26 | 1 | 33 | 6 | 27 | 0 | 1316.7106000 | 1316.7106536 |
| -0.0000536 | -0.0004000 | 0.0000000 |    |   |    |   |    |   |              |              |
| 1699:      | 31         | 6         | 25 | 1 | 32 | 6 | 26 | 0 | 1316.9695500 | 1316.9697024 |
| -0.0001524 | -0.0004000 | 0.0000000 |    |   |    |   |    |   |              |              |
| 1700:      | 30         | 6         | 24 | 1 | 31 | 6 | 25 | 0 | 1317.2287700 | 1317.2286290 |
| 0.0001410  | -0.0004000 | 0.0000000 |    |   |    |   |    |   |              |              |
| 1701:      | 28         | 6         | 22 | 1 | 29 | 6 | 23 | 0 | 1317.7458000 | 1317.7461126 |
| -0.0003126 | -0.0004000 | 0.0000000 |    |   |    |   |    |   |              |              |
| 1702:      | 27         | 6         | 21 | 1 | 28 | 6 | 22 | 0 | 1318.0045800 | 1318.0046680 |
| -0.0000880 | -0.0004000 | 0.0000000 |    |   |    |   |    |   |              |              |
| 1703:      | 26         | 6         | 20 | 1 | 27 | 6 | 21 | 0 | 1318.2628100 | 1318.2630980 |
| -0.0002880 | -0.0004000 | 0.0000000 |    |   |    |   |    |   |              |              |
| 1704:      | 25         | 6         | 19 | 1 | 26 | 6 | 20 | 0 | 1318.5216700 | 1318.5214020 |
| 0.0002680  | -0.0004000 | 0.0000000 |    |   |    |   |    |   |              |              |
| 1705:      | 24         | 6         | 18 | 1 | 25 | 6 | 19 | 0 | 1318.7796100 | 1318.7795793 |
| 0.0000307  | -0.0004000 | 0.0000000 |    |   |    |   |    |   |              |              |
| 1706:      | 23         | 6         | 17 | 1 | 24 | 6 | 18 | 0 | 1319.0374400 | 1319.0376291 |
| -0.0001891 | -0.0004000 | 0.0000000 |    |   |    |   |    |   |              |              |
| 1707:      | 22         | 6         | 16 | 1 | 23 | 6 | 17 | 0 | 1319.2954800 | 1319.2955509 |
| -0.0000709 | -0.0004000 | 0.0000000 |    |   |    |   |    |   |              |              |
| 1708:      | 21         | 6         | 15 | 1 | 22 | 6 | 16 | 0 | 1319.5530600 | 1319.5533440 |
| -0.0002840 | -0.0004000 | 0.0000000 |    |   |    |   |    |   |              |              |
| 1709:      | 20         | 6         | 14 | 1 | 21 | 6 | 15 | 0 | 1319.8110100 | 1319.8110078 |
| 0.0000022  | -0.0004000 | 0.0000000 |    |   |    |   |    |   |              |              |
| 1710:      | 19         | 6         | 13 | 1 | 20 | 6 | 14 | 0 | 1320.0686500 | 1320.0685419 |
| 0.0001081  | -0.0004000 | 0.0000000 |    |   |    |   |    |   |              |              |
| 1711:      | 18         | 6         | 12 | 1 | 19 | 6 | 13 | 0 | 1320.3260400 | 1320.3259458 |
| 0.0000942  | -0.0004000 | 0.0000000 |    |   |    |   |    |   |              |              |
| 1712:      | 17         | 6         | 11 | 1 | 18 | 6 | 12 | 0 | 1320.5827400 | 1320.5832190 |
| -0.0004790 | -0.0004000 | 0.0000000 |    |   |    |   |    |   |              |              |
| 1713:      | 16         | 6         | 10 | 1 | 17 | 6 | 11 | 0 | 1320.8405300 | 1320.8403611 |
| 0.0001689  | -0.0004000 | 0.0000000 |    |   |    |   |    |   |              |              |
| 1714:      | 15         | 6         | 9  | 1 | 16 | 6 | 10 | 0 | 1321.0977400 | 1321.0973718 |
| 0.0003682  | -0.0004000 | 0.0000000 |    |   |    |   |    |   |              |              |
| 1715:      | 14         | 6         | 8  | 1 | 15 | 6 | 9  | 0 | 1321.3539200 | 1321.3542507 |
| -0.0003307 | -0.0004000 | 0.0000000 |    |   |    |   |    |   |              |              |
| 1716:      | 13         | 6         | 7  | 1 | 14 | 6 | 8  | 0 | 1321.6109700 | 1321.6109976 |
| -0.0000276 | -0.0004000 | 0.0000000 |    |   |    |   |    |   |              |              |
| 1717:      | 12         | 6         | 6  | 1 | 13 | 6 | 7  | 0 | 1321.8675500 | 1321.8676123 |
| -0.0000623 | -0.0004000 | 0.0000000 |    |   |    |   |    |   |              |              |
| 1718:      | 11         | 6         | 5  | 1 | 12 | 6 | 6  | 0 | 1322.1243900 | 1322.1240947 |
| 0.0002953  | -0.0004000 | 0.0000000 |    |   |    |   |    |   |              |              |
| 1719:      | 10         | 6         | 4  | 1 | 11 | 6 | 5  | 0 | 1322.3808600 | 1322.3804445 |
| 0.0004155  | -0.0004000 | 0.0000000 |    |   |    |   |    |   |              |              |
| 1720:      | 9          | 6         | 3  | 1 | 10 | 6 | 4  | 0 | 1322.6366100 | 1322.6366618 |

|            |            |           |              |              |
|------------|------------|-----------|--------------|--------------|
| -0.0000518 | -0.0004000 | 0.0000000 |              |              |
| 1721: 8    | 6          | 2         | 1            | 9 6 3 0      |
| 0.0004236  | -0.0004000 | 0.0000000 | 1322.8931700 | 1322.8927464 |
| 1722: 7    | 6          | 1         | 1            | 8 6 2 0      |
| -0.0003485 | -0.0004000 | 0.0000000 | 1323.1483500 | 1323.1486985 |
| 1723: 6    | 6          | 0         | 1            | 7 6 1 0      |
| -0.0002581 | -0.0004000 | 0.0000000 | 1323.4042600 | 1323.4045181 |
| 1724: 8    | 6          | 2         | 1            | 7 6 1 0      |
| 0.0000267  | -0.0004000 | 0.0000000 | 1327.2261200 | 1327.2260933 |
| 1725: 9    | 6          | 3         | 1            | 8 6 2 0      |
| 0.0000119  | -0.0004000 | 0.0000000 | 1327.4798500 | 1327.4798381 |
| 1726: 10   | 6          | 4         | 1            | 9 6 3 0      |
| 0.0000019  | -0.0004000 | 0.0000000 | 1327.7334600 | 1327.7334581 |
| 1727: 11   | 6          | 5         | 1            | 10 6 4 0     |
| -0.0001143 | -0.0004000 | 0.0000000 | 1327.9868400 | 1327.9869543 |
| 1728: 12   | 6          | 6         | 1            | 11 6 5 0     |
| 0.0001025  | -0.0004000 | 0.0000000 | 1328.2404300 | 1328.2403275 |
| 1729: 13   | 6          | 7         | 1            | 12 6 6 0     |
| 0.0003215  | -0.0004000 | 0.0000000 | 1328.4939000 | 1328.4935785 |
| 1730: 14   | 6          | 8         | 1            | 13 6 7 0     |
| -0.0000983 | -0.0004000 | 0.0000000 | 1328.7466100 | 1328.7467083 |
| 1731: 15   | 6          | 9         | 1            | 14 6 8 0     |
| -0.0000979 | -0.0004000 | 0.0000000 | 1328.9996200 | 1328.9997179 |
| 1732: 16   | 6          | 10        | 1            | 15 6 9 0     |
| 0.0003318  | -0.0004000 | 0.0000000 | 1329.2529400 | 1329.2526082 |
| 1733: 17   | 6          | 11        | 1            | 16 6 10 0    |
| 0.0001697  | -0.0004000 | 0.0000000 | 1329.5055500 | 1329.5053803 |
| 1734: 18   | 6          | 12        | 1            | 17 6 11 0    |
| 0.0001047  | -0.0004000 | 0.0000000 | 1329.7581400 | 1329.7580353 |
| 1735: 20   | 6          | 14        | 1            | 19 6 13 0    |
| 0.0001916  | -0.0004000 | 0.0000000 | 1330.2631900 | 1330.2629984 |
| 1736: 21   | 6          | 15        | 1            | 20 6 14 0    |
| -0.0002088 | -0.0004000 | 0.0000000 | 1330.5151000 | 1330.5153088 |
| 1737: 22   | 6          | 16        | 1            | 21 6 15 0    |
| -0.0003467 | -0.0004000 | 0.0000000 | 1330.7671600 | 1330.7675067 |
| 1738: 23   | 6          | 17        | 1            | 22 6 16 0    |
| -0.0000234 | -0.0004000 | 0.0000000 | 1331.0195700 | 1331.0195934 |
| 1739: 24   | 6          | 18        | 1            | 23 6 17 0    |
| -0.0001602 | -0.0004000 | 0.0000000 | 1331.2714100 | 1331.2715702 |
| 1740: 25   | 6          | 19        | 1            | 24 6 18 0    |
| 0.0001416  | -0.0004000 | 0.0000000 | 1331.5235800 | 1331.5234384 |
| 1741: 26   | 6          | 20        | 1            | 25 6 19 0    |
| 0.0000505  | -0.0004000 | 0.0000000 | 1331.7752500 | 1331.7751995 |
| 1742: 27   | 6          | 21        | 1            | 26 6 20 0    |
| 0.0000650  | -0.0004000 | 0.0000000 | 1332.0269200 | 1332.0268550 |
| 1743: 28   | 6          | 22        | 1            | 27 6 21 0    |
| 0.0000238  | -0.0004000 | 0.0000000 | 1332.2784300 | 1332.2784062 |
| 1744: 29   | 6          | 23        | 1            | 28 6 22 0    |
| 0.0000451  | -0.0004000 | 0.0000000 | 1332.5299000 | 1332.5298549 |
| 1745: 30   | 6          | 24        | 1            | 29 6 23 0    |
| 0.0001174  | -0.0004000 | 0.0000000 | 1332.7813200 | 1332.7812026 |
| 1746: 31   | 6          | 25        | 1            | 30 6 24 0    |
| 0.0004288  | -0.0004000 | 0.0000000 | 1333.0328800 | 1333.0324512 |
| 1747: 33   | 6          | 27        | 1            | 32 6 26 0    |
| -0.0000882 | -0.0004000 | 0.0000000 | 1333.5345700 | 1333.5346582 |
| 1748: 34   | 6          | 28        | 1            | 33 6 27 0    |
| -0.0001407 | -0.0004000 | 0.0000000 | 1333.7854800 | 1333.7856207 |
| 1749: 35   | 6          | 29        | 1            | 34 6 28 0    |
| 0.0000080  | -0.0004000 | 0.0000000 | 1334.0365000 | 1334.0364920 |
| 1750: 38   | 6          | 32        | 1            | 37 6 31 0    |
| -0.0001839 | -0.0004000 | 0.0000000 | 1334.7884000 | 1334.7885839 |
| 1751: 39   | 6          | 33        | 1            | 38 6 32 0    |
| -0.0001464 | -0.0004000 | 0.0000000 | 1335.0389700 | 1335.0391164 |
| 1752: 40   | 6          | 34        | 1            | 39 6 33 0    |
| -0.0000918 | -0.0004000 | 0.0000000 | 1335.2894800 | 1335.2895718 |

|                                 |              |              |
|---------------------------------|--------------|--------------|
| 1753: 41 6 35 1 40 6 34 0       | 1335.5401900 | 1335.5399538 |
| 0.0002362 -0.0004000 0.0000000  |              |              |
| 1754: 42 6 36 1 41 6 35 0       | 1335.7904800 | 1335.7902663 |
| 0.0002137 -0.0004000 0.0000000  |              |              |
| 1755: 43 6 37 1 42 6 36 0       | 1336.0403600 | 1336.0405138 |
| -0.0001538 -0.0004000 0.0000000 |              |              |
| 1756: 44 6 38 1 43 6 37 0       | 1336.2904500 | 1336.2907013 |
| -0.0002513 -0.0004000 0.0000000 |              |              |
| 1757: 52 6 46 1 51 6 45 0       | 1338.2908700 | 1338.2908606 |
| 0.0000094 -0.0004000 0.0000000  |              |              |
| 1758: 53 6 47 1 52 6 46 0       | 1338.5411400 | 1338.5408536 |
| 0.0002864 -0.0004000 0.0000000  |              |              |
| 1759: 54 6 48 1 53 6 47 0       | 1338.7906700 | 1338.7908830 |
| -0.0002130 -0.0004000 0.0000000 |              |              |
| 1760: 55 6 49 1 54 6 48 0       | 1339.0407500 | 1339.0409654 |
| -0.0002154 -0.0004000 0.0000000 |              |              |
| 1761: 56 6 50 1 55 6 49 0       | 1339.2915500 | 1339.2911196 |
| 0.0004304 -0.0004000 0.0000000  |              |              |
| 1762: 57 6 51 1 56 6 50 0       | 1339.5415300 | 1339.5413663 |
| 0.0001637 -0.0004000 0.0000000  |              |              |
| 1763: 59 6 53 1 58 6 52 0       | 1340.0425800 | 1340.0422304 |
| 0.0003496 -0.0004000 0.0000000  |              |              |
| 1764: 60 6 54 1 59 6 53 0       | 1340.2929900 | 1340.2929000 |
| 0.0000900 -0.0004000 0.0000000  |              |              |
| 1765: 61 6 55 1 60 6 54 0       | 1340.5433300 | 1340.5437669 |
| -0.0004369 -0.0004000 0.0000000 |              |              |
| 1766: 63 6 57 1 62 6 56 0       | 1341.0462200 | 1341.0462229 |
| -0.0000029 -0.0004000 0.0000000 |              |              |
| 1767: 64 6 58 1 63 6 57 0       | 1341.2973800 | 1341.2978828 |
| -0.0005028 -0.0004000 0.0000000 |              |              |
| 1768: 66 6 60 1 65 6 59 0       | 1341.8023600 | 1341.8022588 |
| 0.0001012 -0.0004000 0.0000000  |              |              |
| 1769: 67 6 61 1 66 6 60 0       | 1342.0549800 | 1342.0550561 |
| -0.0000761 -0.0004000 0.0000000 |              |              |
| 1770: 68 6 62 1 67 6 61 0       | 1342.3080600 | 1342.3083150 |
| -0.0002550 -0.0004000 0.0000000 |              |              |
| 1771: 69 6 63 1 68 6 62 0       | 1342.5620700 | 1342.5620769 |
| -0.0000069 -0.0004000 0.0000000 |              |              |
| 1772: 70 6 64 1 69 6 63 0       | 1342.8166900 | 1342.8163816 |
| 0.0003084 -0.0004000 0.0000000  |              |              |
| 1773: 71 6 65 1 70 6 64 0       | 1343.0713900 | 1343.0712663 |
| 0.0001237 -0.0004000 0.0000000  |              |              |
| 1774: 75 6 69 1 74 6 68 0       | 1344.0978300 | 1344.0971699 |
| 0.0006601 -0.0004000 0.0000000  |              |              |
| 1775: 76 6 70 1 75 6 69 0       | 1344.3555700 | 1344.3553070 |
| 0.0002630 -0.0004000 0.0000000  |              |              |
| 1776: 77 6 71 1 76 6 70 0       | 1344.6145800 | 1344.6140971 |
| 0.0004829 -0.0004000 0.0000000  |              |              |
| 1777: 78 6 72 1 77 6 71 0       | 1344.8735000 | 1344.8735092 |
| -0.0000092 -0.0004000 0.0000000 |              |              |
| 1778: 80 6 74 1 79 6 73 0       | 1345.3941300 | 1345.3939887 |
| 0.0001413 -0.0004000 0.0000000  |              |              |
| 1779: 81 6 75 1 80 6 74 0       | 1345.6553000 | 1345.6549040 |
| 0.0003960 -0.0004000 0.0000000  |              |              |
| 1780: 71 6 66 1 72 6 67 0       | 1306.5379400 | 1306.5387116 |
| -0.0007716 -0.0004000 0.0000000 |              |              |
| 1781: 67 6 62 1 68 6 63 0       | 1307.5843700 | 1307.5845559 |
| -0.0001859 -0.0004000 0.0000000 |              |              |
| 1782: 66 6 61 1 67 6 62 0       | 1307.8458100 | 1307.8461120 |
| -0.0003020 -0.0004000 0.0000000 |              |              |
| 1783: 65 6 60 1 66 6 61 0       | 1308.1075700 | 1308.1076894 |
| -0.0001194 -0.0004000 0.0000000 |              |              |
| 1784: 64 6 59 1 65 6 60 0       | 1308.3691000 | 1308.3692799 |
| -0.0001799 -0.0004000 0.0000000 |              |              |
| 1785: 63 6 58 1 64 6 59 0       | 1308.6315200 | 1308.6308754 |



|            |            |           |              |              |
|------------|------------|-----------|--------------|--------------|
| 0.0006446  | -0.0004000 | 0.0000000 |              |              |
| 1786: 62   | 6 57 1 63  | 6 58 0    | 1308.8923600 | 1308.8924678 |
| -0.0001078 | -0.0004000 | 0.0000000 |              |              |
| 1787: 61   | 6 56 1 62  | 6 57 0    | 1309.1544600 | 1309.1540494 |
| 0.0004106  | -0.0004000 | 0.0000000 |              |              |
| 1788: 60   | 6 55 1 61  | 6 56 0    | 1309.4154200 | 1309.4156126 |
| -0.0001926 | -0.0004000 | 0.0000000 |              |              |
| 1789: 59   | 6 54 1 60  | 6 55 0    | 1309.6767500 | 1309.6771502 |
| -0.0004002 | -0.0004000 | 0.0000000 |              |              |
| 1790: 58   | 6 53 1 59  | 6 54 0    | 1309.9388400 | 1309.9386551 |
| 0.0001849  | -0.0004000 | 0.0000000 |              |              |
| 1791: 44   | 6 39 1 45  | 6 40 0    | 1313.5929700 | 1313.5931400 |
| -0.0001700 | -0.0004000 | 0.0000000 |              |              |
| 1792: 43   | 6 38 1 44  | 6 39 0    | 1313.8534300 | 1313.8535323 |
| -0.0001023 | -0.0004000 | 0.0000000 |              |              |
| 1793: 42   | 6 37 1 43  | 6 38 0    | 1314.1137500 | 1314.1138221 |
| -0.0000721 | -0.0004000 | 0.0000000 |              |              |
| 1794: 41   | 6 36 1 42  | 6 37 0    | 1314.3738900 | 1314.3740074 |
| -0.0001174 | -0.0004000 | 0.0000000 |              |              |
| 1795: 40   | 6 35 1 41  | 6 36 0    | 1314.6340400 | 1314.6340859 |
| -0.0000459 | -0.0004000 | 0.0000000 |              |              |
| 1796: 39   | 6 34 1 40  | 6 35 0    | 1314.8940400 | 1314.8940557 |
| -0.0000157 | -0.0004000 | 0.0000000 |              |              |
| 1797: 38   | 6 33 1 39  | 6 34 0    | 1315.1538500 | 1315.1539152 |
| -0.0000652 | -0.0004000 | 0.0000000 |              |              |
| 1798: 37   | 6 32 1 38  | 6 33 0    | 1315.4138100 | 1315.4136625 |
| 0.0001475  | -0.0004000 | 0.0000000 |              |              |
| 1799: 36   | 6 31 1 37  | 6 32 0    | 1315.6734300 | 1315.6732962 |
| 0.0001338  | -0.0004000 | 0.0000000 |              |              |
| 1800: 35   | 6 30 1 36  | 6 31 0    | 1315.9331200 | 1315.9328148 |
| 0.0003052  | -0.0004000 | 0.0000000 |              |              |
| 1801: 34   | 6 29 1 35  | 6 30 0    | 1316.1923900 | 1316.1922169 |
| 0.0001731  | -0.0004000 | 0.0000000 |              |              |
| 1802: 33   | 6 28 1 34  | 6 29 0    | 1316.4513000 | 1316.4515013 |
| -0.0002013 | -0.0004000 | 0.0000000 |              |              |
| 1803: 32   | 6 27 1 33  | 6 28 0    | 1316.7106000 | 1316.7106666 |
| -0.0000666 | -0.0004000 | 0.0000000 |              |              |
| 1804: 31   | 6 26 1 32  | 6 27 0    | 1316.9695500 | 1316.9697118 |
| -0.0001618 | -0.0004000 | 0.0000000 |              |              |
| 1805: 30   | 6 25 1 31  | 6 26 0    | 1317.2287700 | 1317.2286357 |
| 0.0001343  | -0.0004000 | 0.0000000 |              |              |
| 1806: 28   | 6 23 1 29  | 6 24 0    | 1317.7458000 | 1317.7461159 |
| -0.0003159 | -0.0004000 | 0.0000000 |              |              |
| 1807: 27   | 6 22 1 28  | 6 23 0    | 1318.0045800 | 1318.0046702 |
| -0.0000902 | -0.0004000 | 0.0000000 |              |              |
| 1808: 26   | 6 21 1 27  | 6 22 0    | 1318.2628100 | 1318.2630995 |
| -0.0002895 | -0.0004000 | 0.0000000 |              |              |
| 1809: 25   | 6 20 1 26  | 6 21 0    | 1318.5216700 | 1318.5214030 |
| 0.0002670  | -0.0004000 | 0.0000000 |              |              |
| 1810: 24   | 6 19 1 25  | 6 20 0    | 1318.7796100 | 1318.7795799 |
| 0.0000301  | -0.0004000 | 0.0000000 |              |              |
| 1811: 23   | 6 18 1 24  | 6 19 0    | 1319.0374400 | 1319.0376295 |
| -0.0001895 | -0.0004000 | 0.0000000 |              |              |
| 1812: 22   | 6 17 1 23  | 6 18 0    | 1319.2954800 | 1319.2955511 |
| -0.0000711 | -0.0004000 | 0.0000000 |              |              |
| 1813: 21   | 6 16 1 22  | 6 17 0    | 1319.5530600 | 1319.5533441 |
| -0.0002841 | -0.0004000 | 0.0000000 |              |              |
| 1814: 20   | 6 15 1 21  | 6 16 0    | 1319.8110100 | 1319.8110079 |
| 0.0000021  | -0.0004000 | 0.0000000 |              |              |
| 1815: 19   | 6 14 1 20  | 6 15 0    | 1320.0686500 | 1320.0685420 |
| 0.0001080  | -0.0004000 | 0.0000000 |              |              |
| 1816: 18   | 6 13 1 19  | 6 14 0    | 1320.3260400 | 1320.3259458 |
| 0.0000942  | -0.0004000 | 0.0000000 |              |              |
| 1817: 17   | 6 12 1 18  | 6 13 0    | 1320.5827400 | 1320.5832190 |
| -0.0004790 | -0.0004000 | 0.0000000 |              |              |

|            |                      |              |              |
|------------|----------------------|--------------|--------------|
| 1818: 16   | 6 11 1 17 6 12 0     | 1320.8405300 | 1320.8403611 |
| 0.0001689  | -0.0004000 0.0000000 |              |              |
| 1819: 15   | 6 10 1 16 6 11 0     | 1321.0977400 | 1321.0973718 |
| 0.0003682  | -0.0004000 0.0000000 |              |              |
| 1820: 14   | 6 9 1 15 6 10 0      | 1321.3539200 | 1321.3542507 |
| -0.0003307 | -0.0004000 0.0000000 |              |              |
| 1821: 13   | 6 8 1 14 6 9 0       | 1321.6109700 | 1321.6109976 |
| -0.0000276 | -0.0004000 0.0000000 |              |              |
| 1822: 12   | 6 7 1 13 6 8 0       | 1321.8675500 | 1321.8676123 |
| -0.0000623 | -0.0004000 0.0000000 |              |              |
| 1823: 11   | 6 6 1 12 6 7 0       | 1322.1243900 | 1322.1240947 |
| 0.0002953  | -0.0004000 0.0000000 |              |              |
| 1824: 10   | 6 5 1 11 6 6 0       | 1322.3808600 | 1322.3804445 |
| 0.0004155  | -0.0004000 0.0000000 |              |              |
| 1825: 9    | 6 4 1 10 6 5 0       | 1322.6366100 | 1322.6366618 |
| -0.0000518 | -0.0004000 0.0000000 |              |              |
| 1826: 8    | 6 3 1 9 6 4 0        | 1322.8931700 | 1322.8927464 |
| 0.0004236  | -0.0004000 0.0000000 |              |              |
| 1827: 7    | 6 2 1 8 6 3 0        | 1323.1483500 | 1323.1486985 |
| -0.0003485 | -0.0004000 0.0000000 |              |              |
| 1828: 6    | 6 1 1 7 6 2 0        | 1323.4042600 | 1323.4045181 |
| -0.0002581 | -0.0004000 0.0000000 |              |              |
| 1829: 8    | 6 3 1 7 6 2 0        | 1327.2261200 | 1327.2260933 |
| 0.0000267  | -0.0004000 0.0000000 |              |              |
| 1830: 9    | 6 4 1 8 6 3 0        | 1327.4798500 | 1327.4798381 |
| 0.0000119  | -0.0004000 0.0000000 |              |              |
| 1831: 10   | 6 5 1 9 6 4 0        | 1327.7334600 | 1327.7334581 |
| 0.0000019  | -0.0004000 0.0000000 |              |              |
| 1832: 11   | 6 6 1 10 6 5 0       | 1327.9868400 | 1327.9869543 |
| -0.0001143 | -0.0004000 0.0000000 |              |              |
| 1833: 12   | 6 7 1 11 6 6 0       | 1328.2404300 | 1328.2403275 |
| 0.0001025  | -0.0004000 0.0000000 |              |              |
| 1834: 13   | 6 8 1 12 6 7 0       | 1328.4939000 | 1328.4935785 |
| 0.0003215  | -0.0004000 0.0000000 |              |              |
| 1835: 14   | 6 9 1 13 6 8 0       | 1328.7466100 | 1328.7467083 |
| -0.0000983 | -0.0004000 0.0000000 |              |              |
| 1836: 15   | 6 10 1 14 6 9 0      | 1328.9996200 | 1328.9997179 |
| -0.0000979 | -0.0004000 0.0000000 |              |              |
| 1837: 16   | 6 11 1 15 6 10 0     | 1329.2529400 | 1329.2526082 |
| 0.0003318  | -0.0004000 0.0000000 |              |              |
| 1838: 17   | 6 12 1 16 6 11 0     | 1329.5055500 | 1329.5053803 |
| 0.0001697  | -0.0004000 0.0000000 |              |              |
| 1839: 18   | 6 13 1 17 6 12 0     | 1329.7581400 | 1329.7580353 |
| 0.0001047  | -0.0004000 0.0000000 |              |              |
| 1840: 20   | 6 15 1 19 6 14 0     | 1330.2631900 | 1330.2629983 |
| 0.0001917  | -0.0004000 0.0000000 |              |              |
| 1841: 21   | 6 16 1 20 6 15 0     | 1330.5151000 | 1330.5153086 |
| -0.0002086 | -0.0004000 0.0000000 |              |              |
| 1842: 22   | 6 17 1 21 6 16 0     | 1330.7671600 | 1330.7675065 |
| -0.0003465 | -0.0004000 0.0000000 |              |              |
| 1843: 23   | 6 18 1 22 6 17 0     | 1331.0195700 | 1331.0195930 |
| -0.0000230 | -0.0004000 0.0000000 |              |              |
| 1844: 24   | 6 19 1 23 6 18 0     | 1331.2714100 | 1331.2715696 |
| -0.0001596 | -0.0004000 0.0000000 |              |              |
| 1845: 25   | 6 20 1 24 6 19 0     | 1331.5235800 | 1331.5234375 |
| 0.0001425  | -0.0004000 0.0000000 |              |              |
| 1846: 26   | 6 21 1 25 6 20 0     | 1331.7752500 | 1331.7751981 |
| 0.0000519  | -0.0004000 0.0000000 |              |              |
| 1847: 27   | 6 22 1 26 6 21 0     | 1332.0269200 | 1332.0268528 |
| 0.0000672  | -0.0004000 0.0000000 |              |              |
| 1848: 28   | 6 23 1 27 6 22 0     | 1332.2784300 | 1332.2784030 |
| 0.0000270  | -0.0004000 0.0000000 |              |              |
| 1849: 29   | 6 24 1 28 6 23 0     | 1332.5299000 | 1332.5298501 |
| 0.0000499  | -0.0004000 0.0000000 |              |              |
| 1850: 30   | 6 25 1 29 6 24 0     | 1332.7813200 | 1332.7811956 |

|            |            |           |              |              |
|------------|------------|-----------|--------------|--------------|
| 0.0001244  | -0.0004000 | 0.0000000 |              |              |
| 1851: 31   | 6 26       | 1 30      | 6 25         | 0            |
| 0.0004389  | -0.0004000 | 0.0000000 | 1333.0328800 | 1333.0324411 |
| 1852: 33   | 6 28       | 1 32      | 6 27         | 0            |
| -0.0000680 | -0.0004000 | 0.0000000 | 1333.5345700 | 1333.5346380 |
| 1853: 34   | 6 29       | 1 33      | 6 28         | 0            |
| -0.0001125 | -0.0004000 | 0.0000000 | 1333.7854800 | 1333.7855925 |
| 1854: 35   | 6 30       | 1 34      | 6 29         | 0            |
| 0.0000469  | -0.0004000 | 0.0000000 | 1334.0365000 | 1334.0364531 |
| 1855: 38   | 6 33       | 1 37      | 6 32         | 0            |
| -0.0000869 | -0.0004000 | 0.0000000 | 1334.7884000 | 1334.7884869 |
| 1856: 39   | 6 34       | 1 38      | 6 33         | 0            |
| -0.0000171 | -0.0004000 | 0.0000000 | 1335.0389700 | 1335.0389871 |
| 1857: 40   | 6 35       | 1 39      | 6 34         | 0            |
| 0.0000793  | -0.0004000 | 0.0000000 | 1335.2894800 | 1335.2894007 |
| 1858: 41   | 6 36       | 1 40      | 6 35         | 0            |
| 0.0004610  | -0.0004000 | 0.0000000 | 1335.5401900 | 1335.5397290 |
| 1859: 42   | 6 37       | 1 41      | 6 36         | 0            |
| 0.0005068  | -0.0004000 | 0.0000000 | 1335.7904800 | 1335.7899732 |
| 1860: 43   | 6 38       | 1 42      | 6 37         | 0            |
| 0.0002259  | -0.0004000 | 0.0000000 | 1336.0403600 | 1336.0401341 |
| 1861: 44   | 6 39       | 1 43      | 6 38         | 0            |
| 0.0002374  | -0.0004000 | 0.0000000 | 1336.2904500 | 1336.2902126 |
| 1862: 52   | 6 47       | 1 51      | 6 46         | 0            |
| 0.0001124  | -0.0004000 | 0.0000000 | 1338.2879700 | 1338.2878576 |
| 1863: 53   | 6 48       | 1 52      | 6 47         | 0            |
| -0.0001999 | -0.0004000 | 0.0000000 | 1338.5369700 | 1338.5371699 |
| 1864: 54   | 6 49       | 1 53      | 6 48         | 0            |
| 0.0001054  | -0.0004000 | 0.0000000 | 1338.7864900 | 1338.7863846 |
| 1865: 55   | 6 50       | 1 54      | 6 49         | 0            |
| -0.0002564 | -0.0004000 | 0.0000000 | 1339.0352400 | 1339.0354964 |
| 1866: 56   | 6 51       | 1 55      | 6 50         | 0            |
| 0.0000410  | -0.0004000 | 0.0000000 | 1339.2845400 | 1339.2844990 |
| 1867: 57   | 6 52       | 1 56      | 6 51         | 0            |
| -0.0002250 | -0.0004000 | 0.0000000 | 1339.5331600 | 1339.5333850 |
| 1868: 58   | 6 53       | 1 57      | 6 52         | 0            |
| -0.0001561 | -0.0004000 | 0.0000000 | 1339.7819900 | 1339.7821461 |
| 1869: 59   | 6 54       | 1 58      | 6 53         | 0            |
| -0.0005524 | -0.0004000 | 0.0000000 | 1340.0302200 | 1340.0307724 |
| 1870: 60   | 6 55       | 1 59      | 6 54         | 0            |
| 0.0001072  | -0.0004000 | 0.0000000 | 1340.2793600 | 1340.2792528 |
| 1871: 63   | 6 58       | 1 62      | 6 57         | 0            |
| -0.0002283 | -0.0004000 | 0.0000000 | 1341.0234600 | 1341.0236883 |
| 1872: 64   | 6 59       | 1 63      | 6 58         | 0            |
| 0.0001928  | -0.0004000 | 0.0000000 | 1341.2716400 | 1341.2714472 |
| 1873: 65   | 6 60       | 1 64      | 6 59         | 0            |
| -0.0002438 | -0.0004000 | 0.0000000 | 1341.5187400 | 1341.5189838 |
| 1874: 67   | 6 62       | 1 66      | 6 61         | 0            |
| 0.0008104  | -0.0004000 | 0.0000000 | 1342.0141200 | 1342.0133096 |
| 1875: 68   | 6 63       | 1 67      | 6 62         | 0            |
| 0.0004351  | -0.0004000 | 0.0000000 | 1342.2604900 | 1342.2600549 |
| 1876: 69   | 6 64       | 1 68      | 6 63         | 0            |
| 0.0002298  | -0.0004000 | 0.0000000 | 1342.5067200 | 1342.5064902 |
| 1877: 71   | 6 66       | 1 70      | 6 65         | 0            |
| -0.0003283 | -0.0004000 | 0.0000000 | 1342.9980000 | 1342.9983283 |
| 1878: 72   | 6 67       | 1 71      | 6 66         | 0            |
| 0.0007131  | -0.0004000 | 0.0000000 | 1343.2443900 | 1343.2436769 |
| 1879: 73   | 6 68       | 1 72      | 6 67         | 0            |
| 0.0001527  | -0.0004000 | 0.0000000 | 1343.4887600 | 1343.4886073 |
| 1880: 74   | 6 69       | 1 73      | 6 68         | 0            |
| 0.0001100  | -0.0004000 | 0.0000000 | 1343.7332000 | 1343.7330900 |
| 1881: 75   | 6 70       | 1 74      | 6 69         | 0            |
| -0.0002751 | -0.0004000 | 0.0000000 | 1343.9768200 | 1343.9770951 |
| 1882: 76   | 6 71       | 1 75      | 6 70         | 0            |
| 0.0011283  | -0.0004000 | 0.0000000 | 1344.2217200 | 1344.2205917 |

|                                 |              |              |
|---------------------------------|--------------|--------------|
| 1883: 77 6 72 1 76 6 71 0       | 1344.4640700 | 1344.4635491 |
| 0.0005209 -0.0004000 0.0000000  |              |              |
| 1884: 78 6 73 1 77 6 72 0       | 1344.7057100 | 1344.7059360 |
| -0.0002260 -0.0004000 0.0000000 |              |              |
| 1885: 79 6 74 1 78 6 73 0       | 1344.9481800 | 1344.9477215 |
| 0.0004585 -0.0004000 0.0000000  |              |              |
| 1886: 80 6 75 1 79 6 74 0       | 1345.1890900 | 1345.1888748 |
| 0.0002152 -0.0004000 0.0000000  |              |              |
| 1887: 81 6 76 1 80 6 75 0       | 1345.4296000 | 1345.4293654 |
| 0.0002346 -0.0004000 0.0000000  |              |              |
| 1888: 81 7 74 1 82 7 75 0       | 1303.7868700 | 1303.7869541 |
| -0.0000841 -0.0004000 0.0000000 |              |              |
| 1889: 80 7 73 1 81 7 74 0       | 1304.0502400 | 1304.0499146 |
| 0.0003254 -0.0004000 0.0000000  |              |              |
| 1890: 79 7 72 1 80 7 73 0       | 1304.3131300 | 1304.3127753 |
| 0.0003547 -0.0004000 0.0000000  |              |              |
| 1891: 78 7 71 1 79 7 72 0       | 1304.5751800 | 1304.5755384 |
| -0.0003584 -0.0004000 0.0000000 |              |              |
| 1892: 77 7 70 1 78 7 71 0       | 1304.8381100 | 1304.8382061 |
| -0.0000961 -0.0004000 0.0000000 |              |              |
| 1893: 76 7 69 1 77 7 70 0       | 1305.1004400 | 1305.1007809 |
| -0.0003409 -0.0004000 0.0000000 |              |              |
| 1894: 75 7 68 1 76 7 69 0       | 1305.3625400 | 1305.3632655 |
| -0.0007255 -0.0004000 0.0000000 |              |              |
| 1895: 71 7 64 1 72 7 65 0       | 1306.4129400 | 1306.4123508 |
| 0.0005892 -0.0004000 0.0000000  |              |              |
| 1896: 70 7 63 1 71 7 64 0       | 1306.6747700 | 1306.6744201 |
| 0.0003499 -0.0004000 0.0000000  |              |              |
| 1897: 55 7 48 1 56 7 49 0       | 1310.5966300 | 1310.5966703 |
| -0.0000403 -0.0004000 0.0000000 |              |              |
| 1898: 54 7 47 1 55 7 48 0       | 1310.8576800 | 1310.8575709 |
| 0.0001091 -0.0004000 0.0000000  |              |              |
| 1899: 53 7 46 1 54 7 47 0       | 1311.1183500 | 1311.1183950 |
| -0.0000450 -0.0004000 0.0000000 |              |              |
| 1900: 52 7 45 1 53 7 46 0       | 1311.3790300 | 1311.3791416 |
| -0.0001116 -0.0004000 0.0000000 |              |              |
| 1901: 51 7 44 1 52 7 45 0       | 1311.6393200 | 1311.6398093 |
| -0.0004893 -0.0004000 0.0000000 |              |              |
| 1902: 49 7 42 1 50 7 43 0       | 1312.1609400 | 1312.1609033 |
| 0.0000367 -0.0004000 0.0000000  |              |              |
| 1903: 48 7 41 1 49 7 42 0       | 1312.4215500 | 1312.4213269 |
| 0.0002231 -0.0004000 0.0000000  |              |              |
| 1904: 47 7 40 1 48 7 41 0       | 1312.6818000 | 1312.6816664 |
| 0.0001336 -0.0004000 0.0000000  |              |              |
| 1905: 45 7 38 1 46 7 39 0       | 1313.2020500 | 1313.2020877 |
| -0.0000377 -0.0004000 0.0000000 |              |              |
| 1906: 43 7 36 1 44 7 37 0       | 1313.7223900 | 1313.7221558 |
| 0.0002342 -0.0004000 0.0000000  |              |              |
| 1907: 42 7 35 1 43 7 36 0       | 1313.9820400 | 1313.9820539 |
| -0.0000139 -0.0004000 0.0000000 |              |              |
| 1908: 41 7 34 1 42 7 35 0       | 1314.2422900 | 1314.2418594 |
| 0.0004306 -0.0004000 0.0000000  |              |              |
| 1909: 40 7 33 1 41 7 34 0       | 1314.5015800 | 1314.5015709 |
| 0.0000091 -0.0004000 0.0000000  |              |              |
| 1910: 39 7 32 1 40 7 33 0       | 1314.7616800 | 1314.7611871 |
| 0.0004929 -0.0004000 0.0000000  |              |              |
| 1911: 38 7 31 1 39 7 32 0       | 1315.0211800 | 1315.0207064 |
| 0.0004736 -0.0004000 0.0000000  |              |              |
| 1912: 37 7 30 1 38 7 31 0       | 1315.2802800 | 1315.2801276 |
| 0.0001524 -0.0004000 0.0000000  |              |              |
| 1913: 36 7 29 1 37 7 30 0       | 1315.5393600 | 1315.5394492 |
| -0.0000892 -0.0004000 0.0000000 |              |              |
| 1914: 34 7 27 1 35 7 28 0       | 1316.0576200 | 1316.0577885 |
| -0.0001685 -0.0004000 0.0000000 |              |              |
| 1915: 33 7 26 1 34 7 27 0       | 1316.3167200 | 1316.3168035 |

|            |            |           |              |              |
|------------|------------|-----------|--------------|--------------|
| -0.0000835 | -0.0004000 | 0.0000000 |              |              |
| 1916: 32   | 7 25 1 33  | 7 26 0    | 1316.5757300 | 1316.5757138 |
| 0.0000162  | -0.0004000 | 0.0000000 |              |              |
| 1917: 31   | 7 24 1 32  | 7 25 0    | 1316.8345100 | 1316.8345180 |
| -0.0000080 | -0.0004000 | 0.0000000 |              |              |
| 1918: 30   | 7 23 1 31  | 7 24 0    | 1317.0930200 | 1317.0932150 |
| -0.0001950 | -0.0004000 | 0.0000000 |              |              |
| 1919: 29   | 7 22 1 30  | 7 23 0    | 1317.3518800 | 1317.3518035 |
| 0.0000765  | -0.0004000 | 0.0000000 |              |              |
| 1920: 28   | 7 21 1 29  | 7 22 0    | 1317.6102500 | 1317.6102823 |
| -0.0000323 | -0.0004000 | 0.0000000 |              |              |
| 1921: 27   | 7 20 1 28  | 7 21 0    | 1317.8689900 | 1317.8686504 |
| 0.0003396  | -0.0004000 | 0.0000000 |              |              |
| 1922: 26   | 7 19 1 27  | 7 20 0    | 1318.1269300 | 1318.1269066 |
| 0.0000234  | -0.0004000 | 0.0000000 |              |              |
| 1923: 25   | 7 18 1 26  | 7 19 0    | 1318.3849700 | 1318.3850498 |
| -0.0000798 | -0.0004000 | 0.0000000 |              |              |
| 1924: 24   | 7 17 1 25  | 7 18 0    | 1318.6431500 | 1318.6430789 |
| 0.0000711  | -0.0004000 | 0.0000000 |              |              |
| 1925: 23   | 7 16 1 24  | 7 17 0    | 1318.9007000 | 1318.9009931 |
| -0.0002931 | -0.0004000 | 0.0000000 |              |              |
| 1926: 22   | 7 15 1 23  | 7 16 0    | 1319.1591700 | 1319.1587911 |
| 0.0003789  | -0.0004000 | 0.0000000 |              |              |
| 1927: 21   | 7 14 1 22  | 7 15 0    | 1319.4165600 | 1319.4164722 |
| 0.0000878  | -0.0004000 | 0.0000000 |              |              |
| 1928: 20   | 7 13 1 21  | 7 14 0    | 1319.6737400 | 1319.6740354 |
| -0.0002954 | -0.0004000 | 0.0000000 |              |              |
| 1929: 19   | 7 12 1 20  | 7 13 0    | 1319.9315600 | 1319.9314797 |
| 0.0000803  | -0.0004000 | 0.0000000 |              |              |
| 1930: 17   | 7 10 1 18  | 7 11 0    | 1320.4456800 | 1320.4460085 |
| -0.0003285 | -0.0004000 | 0.0000000 |              |              |
| 1931: 16   | 7 9 1 17   | 7 10 0    | 1320.7028100 | 1320.7030913 |
| -0.0002813 | -0.0004000 | 0.0000000 |              |              |
| 1932: 15   | 7 8 1 16   | 7 9 0     | 1320.9602500 | 1320.9600521 |
| 0.0001979  | -0.0004000 | 0.0000000 |              |              |
| 1933: 14   | 7 7 1 15   | 7 8 0     | 1321.2169200 | 1321.2168900 |
| 0.0000300  | -0.0004000 | 0.0000000 |              |              |
| 1934: 13   | 7 6 1 14   | 7 7 0     | 1321.4732800 | 1321.4736044 |
| -0.0003244 | -0.0004000 | 0.0000000 |              |              |
| 1935: 12   | 7 5 1 13   | 7 6 0     | 1321.7302700 | 1321.7301947 |
| 0.0000753  | -0.0004000 | 0.0000000 |              |              |
| 1936: 22   | 7 15 1 21  | 7 14 0    | 1330.6296800 | 1330.6297608 |
| -0.0000808 | -0.0004000 | 0.0000000 |              |              |
| 1937: 28   | 7 21 1 27  | 7 20 0    | 1332.1392800 | 1332.1394496 |
| -0.0001696 | -0.0004000 | 0.0000000 |              |              |
| 1938: 29   | 7 22 1 28  | 7 21 0    | 1332.3907100 | 1332.3906201 |
| 0.0000899  | -0.0004000 | 0.0000000 |              |              |
| 1939: 30   | 7 23 1 29  | 7 22 0    | 1332.6417100 | 1332.6416648 |
| 0.0000452  | -0.0004000 | 0.0000000 |              |              |
| 1940: 32   | 7 25 1 31  | 7 24 0    | 1333.1432900 | 1333.1433790 |
| -0.0000890 | -0.0004000 | 0.0000000 |              |              |
| 1941: 34   | 7 27 1 33  | 7 26 0    | 1333.6448000 | 1333.6445963 |
| 0.0002037  | -0.0004000 | 0.0000000 |              |              |
| 1942: 38   | 7 31 1 37  | 7 30 0    | 1334.6454900 | 1334.6455599 |
| -0.0000699 | -0.0004000 | 0.0000000 |              |              |
| 1943: 39   | 7 32 1 38  | 7 31 0    | 1334.8955900 | 1334.8954984 |
| 0.0000916  | -0.0004000 | 0.0000000 |              |              |
| 1944: 40   | 7 33 1 39  | 7 32 0    | 1335.1453500 | 1335.1453174 |
| 0.0000326  | -0.0004000 | 0.0000000 |              |              |
| 1945: 41   | 7 34 1 40  | 7 33 0    | 1335.3946600 | 1335.3950179 |
| -0.0003579 | -0.0004000 | 0.0000000 |              |              |
| 1946: 42   | 7 35 1 41  | 7 34 0    | 1335.6446200 | 1335.6446007 |
| 0.0000193  | -0.0004000 | 0.0000000 |              |              |
| 1947: 43   | 7 36 1 42  | 7 35 0    | 1335.8940300 | 1335.8940669 |
| -0.0000369 | -0.0004000 | 0.0000000 |              |              |

|            |                      |              |              |
|------------|----------------------|--------------|--------------|
| 1948: 44   | 7 37 1 43 7 36 0     | 1336.1435200 | 1336.1434174 |
| 0.0001026  | -0.0004000 0.0000000 |              |              |
| 1949: 45   | 7 38 1 44 7 37 0     | 1336.3925400 | 1336.3926535 |
| -0.0001135 | -0.0004000 0.0000000 |              |              |
| 1950: 46   | 7 39 1 45 7 38 0     | 1336.6416000 | 1336.6417764 |
| -0.0001764 | -0.0004000 0.0000000 |              |              |
| 1951: 47   | 7 40 1 46 7 39 0     | 1336.8909100 | 1336.8907873 |
| 0.0001227  | -0.0004000 0.0000000 |              |              |
| 1952: 48   | 7 41 1 47 7 40 0     | 1337.1397300 | 1337.1396878 |
| 0.0000422  | -0.0004000 0.0000000 |              |              |
| 1953: 49   | 7 42 1 48 7 41 0     | 1337.3884000 | 1337.3884795 |
| -0.0000795 | -0.0004000 0.0000000 |              |              |
| 1954: 50   | 7 43 1 49 7 42 0     | 1337.6369600 | 1337.6371641 |
| -0.0002041 | -0.0004000 0.0000000 |              |              |
| 1955: 51   | 7 44 1 50 7 43 0     | 1337.8857800 | 1337.8857435 |
| 0.0000365  | -0.0004000 0.0000000 |              |              |
| 1956: 52   | 7 45 1 51 7 44 0     | 1338.1340400 | 1338.1342200 |
| -0.0001800 | -0.0004000 0.0000000 |              |              |
| 1957: 53   | 7 46 1 52 7 45 0     | 1338.3825600 | 1338.3825959 |
| -0.0000359 | -0.0004000 0.0000000 |              |              |
| 1958: 54   | 7 47 1 53 7 46 0     | 1338.6308200 | 1338.6308737 |
| -0.0000537 | -0.0004000 0.0000000 |              |              |
| 1959: 55   | 7 48 1 54 7 47 0     | 1338.8788600 | 1338.8790566 |
| -0.0001966 | -0.0004000 0.0000000 |              |              |
| 1960: 56   | 7 49 1 55 7 48 0     | 1339.1269100 | 1339.1271477 |
| -0.0002377 | -0.0004000 0.0000000 |              |              |
| 1961: 57   | 7 50 1 56 7 49 0     | 1339.3749600 | 1339.3751507 |
| -0.0001907 | -0.0004000 0.0000000 |              |              |
| 1962: 58   | 7 51 1 57 7 50 0     | 1339.6226500 | 1339.6230698 |
| -0.0004198 | -0.0004000 0.0000000 |              |              |
| 1963: 59   | 7 52 1 58 7 51 0     | 1339.8705600 | 1339.8709096 |
| -0.0003496 | -0.0004000 0.0000000 |              |              |
| 1964: 67   | 7 60 1 66 7 59 0     | 1341.8511600 | 1341.8515469 |
| -0.0003869 | -0.0004000 0.0000000 |              |              |
| 1965: 68   | 7 61 1 67 7 60 0     | 1342.0990800 | 1342.0989994 |
| 0.0000806  | -0.0004000 0.0000000 |              |              |
| 1966: 69   | 7 62 1 68 7 61 0     | 1342.3458300 | 1342.3464635 |
| -0.0006335 | -0.0004000 0.0000000 |              |              |
| 1967: 70   | 7 63 1 69 7 62 0     | 1342.5938000 | 1342.5939548 |
| -0.0001548 | -0.0004000 0.0000000 |              |              |
| 1968: 72   | 7 65 1 71 7 64 0     | 1343.0883100 | 1343.0890906 |
| -0.0007806 | -0.0004000 0.0000000 |              |              |
| 1969: 73   | 7 66 1 72 7 65 0     | 1343.3369200 | 1343.3367754 |
| 0.0001446  | -0.0004000 0.0000000 |              |              |
| 1970: 74   | 7 67 1 73 7 66 0     | 1343.5839500 | 1343.5845684 |
| -0.0006184 | -0.0004000 0.0000000 |              |              |
| 1971: 75   | 7 68 1 74 7 67 0     | 1343.8328300 | 1343.8324947 |
| 0.0003353  | -0.0004000 0.0000000 |              |              |
| 1972: 76   | 7 69 1 75 7 68 0     | 1344.0803200 | 1344.0805817 |
| -0.0002617 | -0.0004000 0.0000000 |              |              |
| 1973: 80   | 7 74 1 81 7 75 0     | 1304.0612300 | 1304.0614125 |
| -0.0001825 | -0.0004000 0.0000000 |              |              |
| 1974: 79   | 7 73 1 80 7 74 0     | 1304.3231000 | 1304.3229310 |
| 0.0001690  | -0.0004000 0.0000000 |              |              |
| 1975: 77   | 7 71 1 78 7 72 0     | 1304.8463400 | 1304.8460549 |
| 0.0002851  | -0.0004000 0.0000000 |              |              |
| 1976: 74   | 7 68 1 75 7 69 0     | 1305.6309900 | 1305.6308703 |
| 0.0001197  | -0.0004000 0.0000000 |              |              |
| 1977: 73   | 7 67 1 74 7 68 0     | 1305.8928700 | 1305.8924875 |
| 0.0003825  | -0.0004000 0.0000000 |              |              |
| 1978: 72   | 7 66 1 73 7 67 0     | 1306.1538100 | 1306.1541018 |
| -0.0002918 | -0.0004000 0.0000000 |              |              |
| 1979: 71   | 7 65 1 72 7 66 0     | 1306.4157300 | 1306.4157079 |
| 0.0000221  | -0.0004000 0.0000000 |              |              |
| 1980: 55   | 7 49 1 56 7 50 0     | 1310.5966300 | 1310.5968574 |

|            |            |           |      |                             |
|------------|------------|-----------|------|-----------------------------|
| -0.0002274 | -0.0004000 | 0.0000000 |      |                             |
| 1981: 54   | 7 48       | 1 55      | 7 49 | 0 1310.8576800 1310.8577217 |
| -0.0000417 | -0.0004000 | 0.0000000 |      |                             |
| 1982: 53   | 7 47       | 1 54      | 7 48 | 0 1311.1183500 1311.1185160 |
| -0.0001660 | -0.0004000 | 0.0000000 |      |                             |
| 1983: 52   | 7 46       | 1 53      | 7 47 | 0 1311.3790300 1311.3792381 |
| -0.0002081 | -0.0004000 | 0.0000000 |      |                             |
| 1984: 51   | 7 45       | 1 52      | 7 46 | 0 1311.6393200 1311.6398860 |
| -0.0005660 | -0.0004000 | 0.0000000 |      |                             |
| 1985: 49   | 7 43       | 1 50      | 7 44 | 0 1312.1609400 1312.1609509 |
| -0.0000109 | -0.0004000 | 0.0000000 |      |                             |
| 1986: 48   | 7 42       | 1 49      | 7 43 | 0 1312.4215500 1312.4213641 |
| 0.0001859  | -0.0004000 | 0.0000000 |      |                             |
| 1987: 47   | 7 41       | 1 48      | 7 42 | 0 1312.6818000 1312.6816953 |
| 0.0001047  | -0.0004000 | 0.0000000 |      |                             |
| 1988: 45   | 7 39       | 1 46      | 7 40 | 0 1313.2020500 1313.2021048 |
| -0.0000548 | -0.0004000 | 0.0000000 |      |                             |
| 1989: 43   | 7 37       | 1 44      | 7 38 | 0 1313.7223900 1313.7221657 |
| 0.0002243  | -0.0004000 | 0.0000000 |      |                             |
| 1990: 42   | 7 36       | 1 43      | 7 37 | 0 1313.9820400 1313.9820613 |
| -0.0000213 | -0.0004000 | 0.0000000 |      |                             |
| 1991: 41   | 7 35       | 1 42      | 7 36 | 0 1314.2422900 1314.2418649 |
| 0.0004251  | -0.0004000 | 0.0000000 |      |                             |
| 1992: 40   | 7 34       | 1 41      | 7 35 | 0 1314.5015800 1314.5015750 |
| 0.0000050  | -0.0004000 | 0.0000000 |      |                             |
| 1993: 39   | 7 33       | 1 40      | 7 34 | 0 1314.7616800 1314.7611901 |
| 0.0004899  | -0.0004000 | 0.0000000 |      |                             |
| 1994: 38   | 7 32       | 1 39      | 7 33 | 0 1315.0211800 1315.0207086 |
| 0.0004714  | -0.0004000 | 0.0000000 |      |                             |
| 1995: 37   | 7 31       | 1 38      | 7 32 | 0 1315.2802800 1315.2801292 |
| 0.0001508  | -0.0004000 | 0.0000000 |      |                             |
| 1996: 36   | 7 30       | 1 37      | 7 31 | 0 1315.5393600 1315.5394503 |
| -0.0000903 | -0.0004000 | 0.0000000 |      |                             |
| 1997: 34   | 7 28       | 1 35      | 7 29 | 0 1316.0576200 1316.0577891 |
| -0.0001691 | -0.0004000 | 0.0000000 |      |                             |
| 1998: 33   | 7 27       | 1 34      | 7 28 | 0 1316.3167200 1316.3168039 |
| -0.0000839 | -0.0004000 | 0.0000000 |      |                             |
| 1999: 32   | 7 26       | 1 33      | 7 27 | 0 1316.5757300 1316.5757141 |
| 0.0000159  | -0.0004000 | 0.0000000 |      |                             |
| 2000: 31   | 7 25       | 1 32      | 7 26 | 0 1316.8345100 1316.8345182 |
| -0.0000082 | -0.0004000 | 0.0000000 |      |                             |
| 2001: 30   | 7 24       | 1 31      | 7 25 | 0 1317.0930200 1317.0932151 |
| -0.0001951 | -0.0004000 | 0.0000000 |      |                             |
| 2002: 29   | 7 23       | 1 30      | 7 24 | 0 1317.3518800 1317.3518035 |
| 0.0000765  | -0.0004000 | 0.0000000 |      |                             |
| 2003: 28   | 7 22       | 1 29      | 7 23 | 0 1317.6102500 1317.6102824 |
| -0.0000324 | -0.0004000 | 0.0000000 |      |                             |
| 2004: 27   | 7 21       | 1 28      | 7 22 | 0 1317.8689900 1317.8686504 |
| 0.0003396  | -0.0004000 | 0.0000000 |      |                             |
| 2005: 26   | 7 20       | 1 27      | 7 21 | 0 1318.1269300 1318.1269066 |
| 0.0000234  | -0.0004000 | 0.0000000 |      |                             |
| 2006: 25   | 7 19       | 1 26      | 7 20 | 0 1318.3849700 1318.3850498 |
| -0.0000798 | -0.0004000 | 0.0000000 |      |                             |
| 2007: 24   | 7 18       | 1 25      | 7 19 | 0 1318.6431500 1318.6430789 |
| 0.0000711  | -0.0004000 | 0.0000000 |      |                             |
| 2008: 23   | 7 17       | 1 24      | 7 18 | 0 1318.9007000 1318.9009931 |
| -0.0002931 | -0.0004000 | 0.0000000 |      |                             |
| 2009: 22   | 7 16       | 1 23      | 7 17 | 0 1319.1591700 1319.1587911 |
| 0.0003789  | -0.0004000 | 0.0000000 |      |                             |
| 2010: 21   | 7 15       | 1 22      | 7 16 | 0 1319.4165600 1319.4164722 |
| 0.0000878  | -0.0004000 | 0.0000000 |      |                             |
| 2011: 20   | 7 14       | 1 21      | 7 15 | 0 1319.6737400 1319.6740354 |
| -0.0002954 | -0.0004000 | 0.0000000 |      |                             |
| 2012: 19   | 7 13       | 1 20      | 7 14 | 0 1319.9315600 1319.9314797 |
| 0.0000803  | -0.0004000 | 0.0000000 |      |                             |

|            |            |           |    |   |    |   |    |   |              |              |
|------------|------------|-----------|----|---|----|---|----|---|--------------|--------------|
| 2013:      | 17         | 7         | 11 | 1 | 18 | 7 | 12 | 0 | 1320.4456800 | 1320.4460085 |
| -0.0003285 | -0.0004000 | 0.0000000 |    |   |    |   |    |   |              |              |
| 2014:      | 16         | 7         | 10 | 1 | 17 | 7 | 11 | 0 | 1320.7028100 | 1320.7030913 |
| -0.0002813 | -0.0004000 | 0.0000000 |    |   |    |   |    |   |              |              |
| 2015:      | 15         | 7         | 9  | 1 | 16 | 7 | 10 | 0 | 1320.9602500 | 1320.9600521 |
| 0.0001979  | -0.0004000 | 0.0000000 |    |   |    |   |    |   |              |              |
| 2016:      | 14         | 7         | 8  | 1 | 15 | 7 | 9  | 0 | 1321.2169200 | 1321.2168900 |
| 0.0000300  | -0.0004000 | 0.0000000 |    |   |    |   |    |   |              |              |
| 2017:      | 13         | 7         | 7  | 1 | 14 | 7 | 8  | 0 | 1321.4732800 | 1321.4736044 |
| -0.0003244 | -0.0004000 | 0.0000000 |    |   |    |   |    |   |              |              |
| 2018:      | 12         | 7         | 6  | 1 | 13 | 7 | 7  | 0 | 1321.7302700 | 1321.7301947 |
| 0.0000753  | -0.0004000 | 0.0000000 |    |   |    |   |    |   |              |              |
| 2019:      | 22         | 7         | 16 | 1 | 21 | 7 | 15 | 0 | 1330.6296800 | 1330.6297608 |
| -0.0000808 | -0.0004000 | 0.0000000 |    |   |    |   |    |   |              |              |
| 2020:      | 28         | 7         | 22 | 1 | 27 | 7 | 21 | 0 | 1332.1392800 | 1332.1394496 |
| -0.0001696 | -0.0004000 | 0.0000000 |    |   |    |   |    |   |              |              |
| 2021:      | 29         | 7         | 23 | 1 | 28 | 7 | 22 | 0 | 1332.3907100 | 1332.3906200 |
| 0.0000900  | -0.0004000 | 0.0000000 |    |   |    |   |    |   |              |              |
| 2022:      | 30         | 7         | 24 | 1 | 29 | 7 | 23 | 0 | 1332.6417100 | 1332.6416647 |
| 0.0000453  | -0.0004000 | 0.0000000 |    |   |    |   |    |   |              |              |
| 2023:      | 32         | 7         | 26 | 1 | 31 | 7 | 25 | 0 | 1333.1432900 | 1333.1433787 |
| -0.0000887 | -0.0004000 | 0.0000000 |    |   |    |   |    |   |              |              |
| 2024:      | 34         | 7         | 28 | 1 | 33 | 7 | 27 | 0 | 1333.6448000 | 1333.6445957 |
| 0.0002043  | -0.0004000 | 0.0000000 |    |   |    |   |    |   |              |              |
| 2025:      | 38         | 7         | 32 | 1 | 37 | 7 | 31 | 0 | 1334.6454900 | 1334.6455573 |
| -0.0000673 | -0.0004000 | 0.0000000 |    |   |    |   |    |   |              |              |
| 2026:      | 39         | 7         | 33 | 1 | 38 | 7 | 32 | 0 | 1334.8955900 | 1334.8954947 |
| 0.0000953  | -0.0004000 | 0.0000000 |    |   |    |   |    |   |              |              |
| 2027:      | 40         | 7         | 34 | 1 | 39 | 7 | 33 | 0 | 1335.1453500 | 1335.1453123 |
| 0.0000377  | -0.0004000 | 0.0000000 |    |   |    |   |    |   |              |              |
| 2028:      | 41         | 7         | 35 | 1 | 40 | 7 | 34 | 0 | 1335.3946600 | 1335.3950107 |
| -0.0003507 | -0.0004000 | 0.0000000 |    |   |    |   |    |   |              |              |
| 2029:      | 42         | 7         | 36 | 1 | 41 | 7 | 35 | 0 | 1335.6446200 | 1335.6445909 |
| 0.0000291  | -0.0004000 | 0.0000000 |    |   |    |   |    |   |              |              |
| 2030:      | 43         | 7         | 37 | 1 | 42 | 7 | 36 | 0 | 1335.8940300 | 1335.8940535 |
| -0.0000235 | -0.0004000 | 0.0000000 |    |   |    |   |    |   |              |              |
| 2031:      | 44         | 7         | 38 | 1 | 43 | 7 | 37 | 0 | 1336.1435200 | 1336.1433994 |
| 0.0001206  | -0.0004000 | 0.0000000 |    |   |    |   |    |   |              |              |
| 2032:      | 45         | 7         | 39 | 1 | 44 | 7 | 38 | 0 | 1336.3925400 | 1336.3926293 |
| -0.0000893 | -0.0004000 | 0.0000000 |    |   |    |   |    |   |              |              |
| 2033:      | 46         | 7         | 40 | 1 | 45 | 7 | 39 | 0 | 1336.6416000 | 1336.6417441 |
| -0.0001441 | -0.0004000 | 0.0000000 |    |   |    |   |    |   |              |              |
| 2034:      | 47         | 7         | 41 | 1 | 46 | 7 | 40 | 0 | 1336.8909100 | 1336.8907446 |
| 0.0001654  | -0.0004000 | 0.0000000 |    |   |    |   |    |   |              |              |
| 2035:      | 48         | 7         | 42 | 1 | 47 | 7 | 41 | 0 | 1337.1397300 | 1337.1396316 |
| 0.0000984  | -0.0004000 | 0.0000000 |    |   |    |   |    |   |              |              |
| 2036:      | 49         | 7         | 43 | 1 | 48 | 7 | 42 | 0 | 1337.3884000 | 1337.3884060 |
| -0.0000060 | -0.0004000 | 0.0000000 |    |   |    |   |    |   |              |              |
| 2037:      | 50         | 7         | 44 | 1 | 49 | 7 | 43 | 0 | 1337.6369600 | 1337.6370686 |
| -0.0001086 | -0.0004000 | 0.0000000 |    |   |    |   |    |   |              |              |
| 2038:      | 51         | 7         | 45 | 1 | 50 | 7 | 44 | 0 | 1337.8857800 | 1337.8856202 |
| 0.0001598  | -0.0004000 | 0.0000000 |    |   |    |   |    |   |              |              |
| 2039:      | 52         | 7         | 46 | 1 | 51 | 7 | 45 | 0 | 1338.1340400 | 1338.1340615 |
| -0.0000215 | -0.0004000 | 0.0000000 |    |   |    |   |    |   |              |              |
| 2040:      | 53         | 7         | 47 | 1 | 52 | 7 | 46 | 0 | 1338.3825600 | 1338.3823932 |
| 0.0001668  | -0.0004000 | 0.0000000 |    |   |    |   |    |   |              |              |
| 2041:      | 54         | 7         | 48 | 1 | 53 | 7 | 47 | 0 | 1338.6308200 | 1338.6306159 |
| 0.0002041  | -0.0004000 | 0.0000000 |    |   |    |   |    |   |              |              |
| 2042:      | 55         | 7         | 49 | 1 | 54 | 7 | 48 | 0 | 1338.8788600 | 1338.8787301 |
| 0.0001299  | -0.0004000 | 0.0000000 |    |   |    |   |    |   |              |              |
| 2043:      | 56         | 7         | 50 | 1 | 55 | 7 | 49 | 0 | 1339.1269100 | 1339.1267364 |
| 0.0001736  | -0.0004000 | 0.0000000 |    |   |    |   |    |   |              |              |
| 2044:      | 57         | 7         | 51 | 1 | 56 | 7 | 50 | 0 | 1339.3749600 | 1339.3746348 |
| 0.0003252  | -0.0004000 | 0.0000000 |    |   |    |   |    |   |              |              |
| 2045:      | 58         | 7         | 52 | 1 | 57 | 7 | 51 | 0 | 1339.6226500 | 1339.6224255 |



|            |            |           |              |              |
|------------|------------|-----------|--------------|--------------|
| 0.0002245  | -0.0004000 | 0.0000000 |              |              |
| 2046: 59   | 7 53       | 1 58      | 7 52         | 0            |
| 0.0004515  | -0.0004000 | 0.0000000 | 1339.8705600 | 1339.8701085 |
| 2047: 67   | 7 61       | 1 66      | 7 60         | 0            |
| -0.0001478 | -0.0004000 | 0.0000000 | 1341.8474300 | 1341.8475778 |
| 2048: 69   | 7 63       | 1 68      | 7 62         | 0            |
| -0.0000524 | -0.0004000 | 0.0000000 | 1342.3407000 | 1342.3407524 |
| 2049: 70   | 7 64       | 1 69      | 7 63         | 0            |
| 0.0001813  | -0.0004000 | 0.0000000 | 1342.5873200 | 1342.5871387 |
| 2050: 71   | 7 65       | 1 70      | 7 64         | 0            |
| -0.0000423 | -0.0004000 | 0.0000000 | 1342.8333400 | 1342.8333823 |
| 2051: 72   | 7 66       | 1 71      | 7 65         | 0            |
| -0.0004860 | -0.0004000 | 0.0000000 | 1343.0789900 | 1343.0794760 |
| 2052: 74   | 7 68       | 1 73      | 7 67         | 0            |
| -0.0000580 | -0.0004000 | 0.0000000 | 1343.5711200 | 1343.5711780 |
| 2053: 75   | 7 69       | 1 74      | 7 68         | 0            |
| -0.0003959 | -0.0004000 | 0.0000000 | 1343.8163700 | 1343.8167659 |
| 2054: 76   | 7 70       | 1 75      | 7 69         | 0            |
| 0.0001672  | -0.0004000 | 0.0000000 | 1344.0623300 | 1344.0621628 |
| 2055: 77   | 7 71       | 1 76      | 7 70         | 0            |
| 0.0006346  | -0.0004000 | 0.0000000 | 1344.3079900 | 1344.3073554 |
| 2056: 78   | 7 72       | 1 77      | 7 71         | 0            |
| 0.0008508  | -0.0004000 | 0.0000000 | 1344.5531800 | 1344.5523292 |
| 2057: 80   | 7 74       | 1 79      | 7 73         | 0            |
| 0.0001946  | -0.0004000 | 0.0000000 | 1345.0417500 | 1345.0415554 |
| 2058: 81   | 7 75       | 1 80      | 7 74         | 0            |
| 0.0007181  | -0.0004000 | 0.0000000 | 1345.2864900 | 1345.2857719 |
| 2059: 82   | 7 76       | 1 81      | 7 75         | 0            |
| 0.0001923  | -0.0004000 | 0.0000000 | 1345.5298900 | 1345.5296977 |
| 2060: 68   | 8 60       | 1 69      | 8 61         | 0            |
| 0.0001379  | -0.0004000 | 0.0000000 | 1307.0544900 | 1307.0543521 |
| 2061: 67   | 8 59       | 1 68      | 8 60         | 0            |
| 0.0003761  | -0.0004000 | 0.0000000 | 1307.3158700 | 1307.3154939 |
| 2062: 66   | 8 58       | 1 67      | 8 59         | 0            |
| -0.0003066 | -0.0004000 | 0.0000000 | 1307.5762900 | 1307.5765966 |
| 2063: 65   | 8 57       | 1 66      | 8 58         | 0            |
| 0.0005014  | -0.0004000 | 0.0000000 | 1307.8381600 | 1307.8376586 |
| 2064: 64   | 8 56       | 1 65      | 8 57         | 0            |
| 0.0006918  | -0.0004000 | 0.0000000 | 1308.0993700 | 1308.0986782 |
| 2065: 60   | 8 52       | 1 61      | 8 53         | 0            |
| -0.0004183 | -0.0004000 | 0.0000000 | 1309.1418800 | 1309.1422983 |
| 2066: 59   | 8 51       | 1 60      | 8 52         | 0            |
| -0.0001401 | -0.0004000 | 0.0000000 | 1309.4029400 | 1309.4030801 |
| 2067: 58   | 8 50       | 1 59      | 8 51         | 0            |
| -0.0000590 | -0.0004000 | 0.0000000 | 1309.6637500 | 1309.6638090 |
| 2068: 57   | 8 49       | 1 58      | 8 50         | 0            |
| 0.0004066  | -0.0004000 | 0.0000000 | 1309.9248900 | 1309.9244834 |
| 2069: 56   | 8 48       | 1 57      | 8 49         | 0            |
| -0.0002213 | -0.0004000 | 0.0000000 | 1310.1848800 | 1310.1851013 |
| 2070: 54   | 8 46       | 1 55      | 8 47         | 0            |
| 0.0006188  | -0.0004000 | 0.0000000 | 1310.7067800 | 1310.7061612 |
| 2071: 52   | 8 44       | 1 53      | 8 45         | 0            |
| 0.0003455  | -0.0004000 | 0.0000000 | 1311.2273200 | 1311.2269745 |
| 2072: 51   | 8 43       | 1 52      | 8 44         | 0            |
| 0.0003157  | -0.0004000 | 0.0000000 | 1311.4876000 | 1311.4872843 |
| 2073: 50   | 8 42       | 1 51      | 8 43         | 0            |
| 0.0000628  | -0.0004000 | 0.0000000 | 1311.7475900 | 1311.7475272 |
| 2074: 49   | 8 41       | 1 50      | 8 42         | 0            |
| 0.0000685  | -0.0004000 | 0.0000000 | 1312.0077700 | 1312.0077015 |
| 2075: 47   | 8 39       | 1 48      | 8 40         | 0            |
| 0.0000625  | -0.0004000 | 0.0000000 | 1312.5279000 | 1312.5278375 |
| 2076: 46   | 8 38       | 1 47      | 8 39         | 0            |
| -0.0001558 | -0.0004000 | 0.0000000 | 1312.7876400 | 1312.7877958 |
| 2077: 45   | 8 37       | 1 46      | 8 38         | 0            |
| 0.0002013  | -0.0004000 | 0.0000000 | 1313.0478800 | 1313.0476787 |

|                                 |              |              |
|---------------------------------|--------------|--------------|
| 2078: 44 8 36 1 45 8 37 0       | 1313.3074400 | 1313.3074846 |
| -0.0000446 -0.0004000 0.0000000 |              |              |
| 2079: 43 8 35 1 44 8 36 0       | 1313.5672100 | 1313.5672119 |
| -0.0000019 -0.0004000 0.0000000 |              |              |
| 2080: 42 8 34 1 43 8 35 0       | 1313.8268600 | 1313.8268589 |
| 0.0000011 -0.0004000 0.0000000  |              |              |
| 2081: 41 8 33 1 42 8 34 0       | 1314.0861200 | 1314.0864241 |
| -0.0003041 -0.0004000 0.0000000 |              |              |
| 2082: 40 8 32 1 41 8 33 0       | 1314.3459400 | 1314.3459058 |
| 0.0000342 -0.0004000 0.0000000  |              |              |
| 2083: 39 8 31 1 40 8 32 0       | 1314.6054800 | 1314.6053025 |
| 0.0001775 -0.0004000 0.0000000  |              |              |
| 2084: 37 8 29 1 38 8 30 0       | 1315.1238300 | 1315.1238348 |
| -0.0000048 -0.0004000 0.0000000 |              |              |
| 2085: 36 8 28 1 37 8 29 0       | 1315.3827800 | 1315.3829673 |
| -0.0001873 -0.0004000 0.0000000 |              |              |
| 2086: 35 8 27 1 36 8 28 0       | 1315.6419100 | 1315.6420087 |
| -0.0000987 -0.0004000 0.0000000 |              |              |
| 2087: 34 8 26 1 35 8 27 0       | 1315.9011000 | 1315.9009577 |
| 0.0001423 -0.0004000 0.0000000  |              |              |
| 2088: 33 8 25 1 34 8 26 0       | 1316.1599000 | 1316.1598127 |
| 0.0000873 -0.0004000 0.0000000  |              |              |
| 2089: 32 8 24 1 33 8 25 0       | 1316.4185000 | 1316.4185723 |
| -0.0000723 -0.0004000 0.0000000 |              |              |
| 2090: 31 8 23 1 32 8 24 0       | 1316.6774000 | 1316.6772351 |
| 0.0001649 -0.0004000 0.0000000  |              |              |
| 2091: 30 8 22 1 31 8 23 0       | 1316.9363100 | 1316.9357998 |
| 0.0005102 -0.0004000 0.0000000  |              |              |
| 2092: 29 8 21 1 30 8 22 0       | 1317.1947700 | 1317.1942651 |
| 0.0005049 -0.0004000 0.0000000  |              |              |
| 2093: 27 8 19 1 28 8 20 0       | 1317.7108200 | 1317.7108917 |
| -0.0000717 -0.0004000 0.0000000 |              |              |
| 2094: 26 8 18 1 27 8 19 0       | 1317.9691600 | 1317.9690505 |
| 0.0001095 -0.0004000 0.0000000  |              |              |
| 2095: 25 8 17 1 26 8 18 0       | 1318.2269300 | 1318.2271047 |
| -0.0001747 -0.0004000 0.0000000 |              |              |
| 2096: 24 8 16 1 25 8 17 0       | 1318.4850700 | 1318.4850530 |
| 0.0000170 -0.0004000 0.0000000  |              |              |
| 2097: 23 8 15 1 24 8 16 0       | 1318.7427800 | 1318.7428941 |
| -0.0001141 -0.0004000 0.0000000 |              |              |
| 2098: 22 8 14 1 23 8 15 0       | 1319.0007500 | 1319.0006269 |
| 0.0001231 -0.0004000 0.0000000  |              |              |
| 2099: 21 8 13 1 22 8 14 0       | 1319.2581500 | 1319.2582503 |
| -0.0001003 -0.0004000 0.0000000 |              |              |
| 2100: 19 8 11 1 20 8 12 0       | 1319.7732700 | 1319.7731640 |
| 0.0001060 -0.0004000 0.0000000  |              |              |
| 2101: 18 8 10 1 19 8 11 0       | 1320.0304600 | 1320.0304522 |
| 0.0000078 -0.0004000 0.0000000  |              |              |
| 2102: 17 8 9 1 18 8 10 0        | 1320.2871500 | 1320.2876264 |
| -0.0004764 -0.0004000 0.0000000 |              |              |
| 2103: 16 8 8 1 17 8 9 0         | 1320.5447100 | 1320.5446857 |
| 0.0000243 -0.0004000 0.0000000  |              |              |
| 2104: 15 8 7 1 16 8 8 0         | 1320.8016000 | 1320.8016291 |
| -0.0000291 -0.0004000 0.0000000 |              |              |
| 2105: 14 8 6 1 15 8 7 0         | 1321.0586800 | 1321.0584554 |
| 0.0002246 -0.0004000 0.0000000  |              |              |
| 2106: 13 8 5 1 14 8 6 0         | 1321.3151000 | 1321.3151638 |
| -0.0000638 -0.0004000 0.0000000 |              |              |
| 2107: 12 8 4 1 13 8 5 0         | 1321.5717300 | 1321.5717533 |
| -0.0000233 -0.0004000 0.0000000 |              |              |
| 2108: 10 8 2 1 11 8 3 0         | 1322.0846000 | 1322.0845720 |
| 0.0000280 -0.0004000 0.0000000  |              |              |
| 2109: 9 8 1 1 10 8 2 0          | 1322.3406600 | 1322.3407993 |
| -0.0001393 -0.0004000 0.0000000 |              |              |
| 2110: 8 8 0 1 9 8 1 0           | 1322.5966500 | 1322.5969042 |

|            |            |                  |              |              |
|------------|------------|------------------|--------------|--------------|
| -0.0002542 | -0.0004000 | 0.0000000        |              |              |
| 2111:      | 11         | 8 3 1 10 8 2 0   | 1327.6918100 | 1327.6921538 |
| -0.0003438 | -0.0004000 | 0.0000000        |              |              |
| 2112:      | 12         | 8 4 1 11 8 3 0   | 1327.9453700 | 1327.9455265 |
| -0.0001565 | -0.0004000 | 0.0000000        |              |              |
| 2113:      | 13         | 8 5 1 12 8 4 0   | 1328.1986300 | 1328.1987632 |
| -0.0001332 | -0.0004000 | 0.0000000        |              |              |
| 2114:      | 15         | 8 7 1 14 8 6 0   | 1328.7043800 | 1328.7048268 |
| -0.0004468 | -0.0004000 | 0.0000000        |              |              |
| 2115:      | 16         | 8 8 1 15 8 7 0   | 1328.9576900 | 1328.9576529 |
| 0.0000371  | -0.0004000 | 0.0000000        |              |              |
| 2116:      | 17         | 8 9 1 16 8 8 0   | 1329.2102700 | 1329.2103414 |
| -0.0000714 | -0.0004000 | 0.0000000        |              |              |
| 2117:      | 18         | 8 10 1 17 8 9 0  | 1329.4630600 | 1329.4628919 |
| 0.0001681  | -0.0004000 | 0.0000000        |              |              |
| 2118:      | 19         | 8 11 1 18 8 10 0 | 1329.7153000 | 1329.7153042 |
| -0.0000042 | -0.0004000 | 0.0000000        |              |              |
| 2119:      | 20         | 8 12 1 19 8 11 0 | 1329.9677700 | 1329.9675778 |
| 0.0001922  | -0.0004000 | 0.0000000        |              |              |
| 2120:      | 21         | 8 13 1 20 8 12 0 | 1330.2200000 | 1330.2197126 |
| 0.0002874  | -0.0004000 | 0.0000000        |              |              |
| 2121:      | 22         | 8 14 1 21 8 13 0 | 1330.4716800 | 1330.4717081 |
| -0.0000281 | -0.0004000 | 0.0000000        |              |              |
| 2122:      | 23         | 8 15 1 22 8 14 0 | 1330.7235000 | 1330.7235641 |
| -0.0000641 | -0.0004000 | 0.0000000        |              |              |
| 2123:      | 24         | 8 16 1 23 8 15 0 | 1330.9750500 | 1330.9752804 |
| -0.0002304 | -0.0004000 | 0.0000000        |              |              |
| 2124:      | 27         | 8 19 1 26 8 18 0 | 1331.7296300 | 1331.7295882 |
| 0.0000418  | -0.0004000 | 0.0000000        |              |              |
| 2125:      | 28         | 8 20 1 27 8 19 0 | 1331.9806300 | 1331.9807431 |
| -0.0001131 | -0.0004000 | 0.0000000        |              |              |
| 2126:      | 29         | 8 21 1 28 8 20 0 | 1332.2315500 | 1332.2317570 |
| -0.0002070 | -0.0004000 | 0.0000000        |              |              |
| 2127:      | 30         | 8 22 1 29 8 21 0 | 1332.4825300 | 1332.4826298 |
| -0.0000998 | -0.0004000 | 0.0000000        |              |              |
| 2128:      | 31         | 8 23 1 30 8 22 0 | 1332.7332900 | 1332.7333613 |
| -0.0000713 | -0.0004000 | 0.0000000        |              |              |
| 2129:      | 32         | 8 24 1 31 8 23 0 | 1332.9839800 | 1332.9839514 |
| 0.0000286  | -0.0004000 | 0.0000000        |              |              |
| 2130:      | 33         | 8 25 1 32 8 24 0 | 1333.2349500 | 1333.2343998 |
| 0.0005502  | -0.0004000 | 0.0000000        |              |              |
| 2131:      | 35         | 8 27 1 34 8 26 0 | 1333.7349600 | 1333.7348713 |
| 0.0000887  | -0.0004000 | 0.0000000        |              |              |
| 2132:      | 36         | 8 28 1 35 8 27 0 | 1333.9847500 | 1333.9848941 |
| -0.0001441 | -0.0004000 | 0.0000000        |              |              |
| 2133:      | 38         | 8 30 1 37 8 29 0 | 1334.4845400 | 1334.4845132 |
| 0.0000268  | -0.0004000 | 0.0000000        |              |              |
| 2134:      | 39         | 8 31 1 38 8 30 0 | 1334.7342800 | 1334.7341094 |
| 0.0001706  | -0.0004000 | 0.0000000        |              |              |
| 2135:      | 40         | 8 32 1 39 8 31 0 | 1334.9838600 | 1334.9835632 |
| 0.0002968  | -0.0004000 | 0.0000000        |              |              |
| 2136:      | 41         | 8 33 1 40 8 32 0 | 1335.2329100 | 1335.2328747 |
| 0.0000353  | -0.0004000 | 0.0000000        |              |              |
| 2137:      | 42         | 8 34 1 41 8 33 0 | 1335.4818400 | 1335.4820437 |
| -0.0002037 | -0.0004000 | 0.0000000        |              |              |
| 2138:      | 43         | 8 35 1 42 8 34 0 | 1335.7311300 | 1335.7310702 |
| 0.0000598  | -0.0004000 | 0.0000000        |              |              |
| 2139:      | 44         | 8 36 1 43 8 35 0 | 1335.9800200 | 1335.9799543 |
| 0.0000657  | -0.0004000 | 0.0000000        |              |              |
| 2140:      | 45         | 8 37 1 44 8 36 0 | 1336.2287200 | 1336.2286960 |
| 0.0000240  | -0.0004000 | 0.0000000        |              |              |
| 2141:      | 46         | 8 38 1 45 8 37 0 | 1336.4772700 | 1336.4772953 |
| -0.0000253 | -0.0004000 | 0.0000000        |              |              |
| 2142:      | 47         | 8 39 1 46 8 38 0 | 1336.7257500 | 1336.7257523 |
| -0.0000023 | -0.0004000 | 0.0000000        |              |              |

|                                 |              |              |
|---------------------------------|--------------|--------------|
| 2143: 48 8 40 1 47 8 39 0       | 1336.9740500 | 1336.9740671 |
| -0.0000171 -0.0004000 0.0000000 |              |              |
| 2144: 49 8 41 1 48 8 40 0       | 1337.2223800 | 1337.2222398 |
| 0.0001402 -0.0004000 0.0000000  |              |              |
| 2145: 50 8 42 1 49 8 41 0       | 1337.4701900 | 1337.4702706 |
| -0.0000806 -0.0004000 0.0000000 |              |              |
| 2146: 51 8 43 1 50 8 42 0       | 1337.7178300 | 1337.7181595 |
| -0.0003295 -0.0004000 0.0000000 |              |              |
| 2147: 52 8 44 1 51 8 43 0       | 1337.9658400 | 1337.9659069 |
| -0.0000669 -0.0004000 0.0000000 |              |              |
| 2148: 53 8 45 1 52 8 44 0       | 1338.2134100 | 1338.2135131 |
| -0.0001031 -0.0004000 0.0000000 |              |              |
| 2149: 55 8 47 1 54 8 46 0       | 1338.7082800 | 1338.7083026 |
| -0.0000226 -0.0004000 0.0000000 |              |              |
| 2150: 56 8 48 1 55 8 47 0       | 1338.9554900 | 1338.9554868 |
| 0.0000032 -0.0004000 0.0000000  |              |              |
| 2151: 57 8 49 1 56 8 48 0       | 1339.2022100 | 1339.2025311 |
| -0.0003211 -0.0004000 0.0000000 |              |              |
| 2152: 58 8 50 1 57 8 49 0       | 1339.4495000 | 1339.4494362 |
| 0.0000638 -0.0004000 0.0000000  |              |              |
| 2153: 59 8 51 1 58 8 50 0       | 1339.6960900 | 1339.6962026 |
| -0.0001126 -0.0004000 0.0000000 |              |              |
| 2154: 60 8 52 1 59 8 51 0       | 1339.9426000 | 1339.9428310 |
| -0.0002310 -0.0004000 0.0000000 |              |              |
| 2155: 61 8 53 1 60 8 52 0       | 1340.1896000 | 1340.1893222 |
| 0.0002778 -0.0004000 0.0000000  |              |              |
| 2156: 64 8 56 1 63 8 55 0       | 1340.9277900 | 1340.9279822 |
| -0.0001922 -0.0004000 0.0000000 |              |              |
| 2157: 65 8 57 1 64 8 56 0       | 1341.1739900 | 1341.1739348 |
| 0.0000552 -0.0004000 0.0000000  |              |              |
| 2158: 66 8 58 1 65 8 57 0       | 1341.4196400 | 1341.4197562 |
| -0.0001162 -0.0004000 0.0000000 |              |              |
| 2159: 67 8 59 1 66 8 58 0       | 1341.6651100 | 1341.6654479 |
| -0.0003379 -0.0004000 0.0000000 |              |              |
| 2160: 68 8 60 1 67 8 59 0       | 1341.9106800 | 1341.9110119 |
| -0.0003319 -0.0004000 0.0000000 |              |              |
| 2161: 70 8 62 1 69 8 61 0       | 1342.4014200 | 1342.4017660 |
| -0.0003460 -0.0004000 0.0000000 |              |              |
| 2162: 71 8 63 1 70 8 62 0       | 1342.6467100 | 1342.6469612 |
| -0.0002512 -0.0004000 0.0000000 |              |              |
| 2163: 68 8 61 1 69 8 62 0       | 1307.0544900 | 1307.0544925 |
| -0.0000025 -0.0004000 0.0000000 |              |              |
| 2164: 67 8 60 1 68 8 61 0       | 1307.3158700 | 1307.3156094 |
| 0.0002606 -0.0004000 0.0000000  |              |              |
| 2165: 66 8 59 1 67 8 60 0       | 1307.5762900 | 1307.5766912 |
| -0.0004012 -0.0004000 0.0000000 |              |              |
| 2166: 65 8 58 1 66 8 59 0       | 1307.8381600 | 1307.8377358 |
| 0.0004242 -0.0004000 0.0000000  |              |              |
| 2167: 64 8 57 1 65 8 58 0       | 1308.0993700 | 1308.0987410 |
| 0.0006290 -0.0004000 0.0000000  |              |              |
| 2168: 60 8 53 1 61 8 54 0       | 1309.1418800 | 1309.1423246 |
| -0.0004446 -0.0004000 0.0000000 |              |              |
| 2169: 59 8 52 1 60 8 53 0       | 1309.4029400 | 1309.4031010 |
| -0.0001610 -0.0004000 0.0000000 |              |              |
| 2170: 58 8 51 1 59 8 52 0       | 1309.6637500 | 1309.6638256 |
| -0.0000756 -0.0004000 0.0000000 |              |              |
| 2171: 57 8 50 1 58 8 51 0       | 1309.9248900 | 1309.9244964 |
| 0.0003936 -0.0004000 0.0000000  |              |              |
| 2172: 56 8 49 1 57 8 50 0       | 1310.1848800 | 1310.1851116 |
| -0.0002316 -0.0004000 0.0000000 |              |              |
| 2173: 54 8 47 1 55 8 48 0       | 1310.7067800 | 1310.7061674 |
| 0.0006126 -0.0004000 0.0000000  |              |              |
| 2174: 52 8 45 1 53 8 46 0       | 1311.2273200 | 1311.2269781 |
| 0.0003419 -0.0004000 0.0000000  |              |              |
| 2175: 51 8 44 1 52 8 45 0       | 1311.4876000 | 1311.4872871 |

|            |            |           |              |              |
|------------|------------|-----------|--------------|--------------|
| 0.0003129  | -0.0004000 | 0.0000000 |              |              |
| 2176: 50   | 8 43 1 51  | 8 44 0    | 1311.7475900 | 1311.7475293 |
| 0.0000607  | -0.0004000 | 0.0000000 |              |              |
| 2177: 49   | 8 42 1 50  | 8 43 0    | 1312.0077700 | 1312.0077031 |
| 0.0000669  | -0.0004000 | 0.0000000 |              |              |
| 2178: 47   | 8 40 1 48  | 8 41 0    | 1312.5279000 | 1312.5278384 |
| 0.0000616  | -0.0004000 | 0.0000000 |              |              |
| 2179: 46   | 8 39 1 47  | 8 40 0    | 1312.7876400 | 1312.7877964 |
| -0.0001564 | -0.0004000 | 0.0000000 |              |              |
| 2180: 45   | 8 38 1 46  | 8 39 0    | 1313.0478800 | 1313.0476792 |
| 0.0002008  | -0.0004000 | 0.0000000 |              |              |
| 2181: 44   | 8 37 1 45  | 8 38 0    | 1313.3074400 | 1313.3074850 |
| -0.0000450 | -0.0004000 | 0.0000000 |              |              |
| 2182: 43   | 8 36 1 44  | 8 37 0    | 1313.5672100 | 1313.5672122 |
| -0.0000022 | -0.0004000 | 0.0000000 |              |              |
| 2183: 42   | 8 35 1 43  | 8 36 0    | 1313.8268600 | 1313.8268591 |
| 0.0000009  | -0.0004000 | 0.0000000 |              |              |
| 2184: 41   | 8 34 1 42  | 8 35 0    | 1314.0861200 | 1314.0864242 |
| -0.0003042 | -0.0004000 | 0.0000000 |              |              |
| 2185: 40   | 8 33 1 41  | 8 34 0    | 1314.3459400 | 1314.3459059 |
| 0.0000341  | -0.0004000 | 0.0000000 |              |              |
| 2186: 39   | 8 32 1 40  | 8 33 0    | 1314.6054800 | 1314.6053026 |
| 0.0001774  | -0.0004000 | 0.0000000 |              |              |
| 2187: 37   | 8 30 1 38  | 8 31 0    | 1315.1238300 | 1315.1238348 |
| -0.0000048 | -0.0004000 | 0.0000000 |              |              |
| 2188: 36   | 8 29 1 37  | 8 30 0    | 1315.3827800 | 1315.3829673 |
| -0.0001873 | -0.0004000 | 0.0000000 |              |              |
| 2189: 35   | 8 28 1 36  | 8 29 0    | 1315.6419100 | 1315.6420087 |
| -0.0000987 | -0.0004000 | 0.0000000 |              |              |
| 2190: 34   | 8 27 1 35  | 8 28 0    | 1315.9011000 | 1315.9009577 |
| 0.0001423  | -0.0004000 | 0.0000000 |              |              |
| 2191: 33   | 8 26 1 34  | 8 27 0    | 1316.1599000 | 1316.1598127 |
| 0.0000873  | -0.0004000 | 0.0000000 |              |              |
| 2192: 32   | 8 25 1 33  | 8 26 0    | 1316.4185000 | 1316.4185723 |
| -0.0000723 | -0.0004000 | 0.0000000 |              |              |
| 2193: 31   | 8 24 1 32  | 8 25 0    | 1316.6774000 | 1316.6772351 |
| 0.0001649  | -0.0004000 | 0.0000000 |              |              |
| 2194: 30   | 8 23 1 31  | 8 24 0    | 1316.9363100 | 1316.9357998 |
| 0.0005102  | -0.0004000 | 0.0000000 |              |              |
| 2195: 29   | 8 22 1 30  | 8 23 0    | 1317.1947700 | 1317.1942651 |
| 0.0005049  | -0.0004000 | 0.0000000 |              |              |
| 2196: 27   | 8 20 1 28  | 8 21 0    | 1317.7108200 | 1317.7108917 |
| -0.0000717 | -0.0004000 | 0.0000000 |              |              |
| 2197: 26   | 8 19 1 27  | 8 20 0    | 1317.9691600 | 1317.9690505 |
| 0.0001095  | -0.0004000 | 0.0000000 |              |              |
| 2198: 25   | 8 18 1 26  | 8 19 0    | 1318.2269300 | 1318.2271047 |
| -0.0001747 | -0.0004000 | 0.0000000 |              |              |
| 2199: 24   | 8 17 1 25  | 8 18 0    | 1318.4850700 | 1318.4850530 |
| 0.0000170  | -0.0004000 | 0.0000000 |              |              |
| 2200: 23   | 8 16 1 24  | 8 17 0    | 1318.7427800 | 1318.7428941 |
| -0.0001141 | -0.0004000 | 0.0000000 |              |              |
| 2201: 22   | 8 15 1 23  | 8 16 0    | 1319.0007500 | 1319.0006269 |
| 0.0001231  | -0.0004000 | 0.0000000 |              |              |
| 2202: 21   | 8 14 1 22  | 8 15 0    | 1319.2581500 | 1319.2582503 |
| -0.0001003 | -0.0004000 | 0.0000000 |              |              |
| 2203: 19   | 8 12 1 20  | 8 13 0    | 1319.7732700 | 1319.7731640 |
| 0.0001060  | -0.0004000 | 0.0000000 |              |              |
| 2204: 18   | 8 11 1 19  | 8 12 0    | 1320.0304600 | 1320.0304522 |
| 0.0000078  | -0.0004000 | 0.0000000 |              |              |
| 2205: 17   | 8 10 1 18  | 8 11 0    | 1320.2871500 | 1320.2876264 |
| -0.0004764 | -0.0004000 | 0.0000000 |              |              |
| 2206: 16   | 8 9 1 17   | 8 10 0    | 1320.5447100 | 1320.5446857 |
| 0.0000243  | -0.0004000 | 0.0000000 |              |              |
| 2207: 15   | 8 8 1 16   | 8 9 0     | 1320.8016000 | 1320.8016291 |
| -0.0000291 | -0.0004000 | 0.0000000 |              |              |

|            |            |           |    |   |    |   |    |   |              |              |
|------------|------------|-----------|----|---|----|---|----|---|--------------|--------------|
| 2208:      | 14         | 8         | 7  | 1 | 15 | 8 | 8  | 0 | 1321.0586800 | 1321.0584554 |
| 0.0002246  | -0.0004000 | 0.0000000 |    |   |    |   |    |   |              |              |
| 2209:      | 13         | 8         | 6  | 1 | 14 | 8 | 7  | 0 | 1321.3151000 | 1321.3151638 |
| -0.0000638 | -0.0004000 | 0.0000000 |    |   |    |   |    |   |              |              |
| 2210:      | 12         | 8         | 5  | 1 | 13 | 8 | 6  | 0 | 1321.5717300 | 1321.5717533 |
| -0.0000233 | -0.0004000 | 0.0000000 |    |   |    |   |    |   |              |              |
| 2211:      | 10         | 8         | 3  | 1 | 11 | 8 | 4  | 0 | 1322.0846000 | 1322.0845720 |
| 0.0000280  | -0.0004000 | 0.0000000 |    |   |    |   |    |   |              |              |
| 2212:      | 9          | 8         | 2  | 1 | 10 | 8 | 3  | 0 | 1322.3406600 | 1322.3407993 |
| -0.0001393 | -0.0004000 | 0.0000000 |    |   |    |   |    |   |              |              |
| 2213:      | 8          | 8         | 1  | 1 | 9  | 8 | 2  | 0 | 1322.5966500 | 1322.5969042 |
| -0.0002542 | -0.0004000 | 0.0000000 |    |   |    |   |    |   |              |              |
| 2214:      | 11         | 8         | 4  | 1 | 10 | 8 | 3  | 0 | 1327.6918100 | 1327.6921538 |
| -0.0003438 | -0.0004000 | 0.0000000 |    |   |    |   |    |   |              |              |
| 2215:      | 12         | 8         | 5  | 1 | 11 | 8 | 4  | 0 | 1327.9453700 | 1327.9455265 |
| -0.0001565 | -0.0004000 | 0.0000000 |    |   |    |   |    |   |              |              |
| 2216:      | 13         | 8         | 6  | 1 | 12 | 8 | 5  | 0 | 1328.1986300 | 1328.1987632 |
| -0.0001332 | -0.0004000 | 0.0000000 |    |   |    |   |    |   |              |              |
| 2217:      | 15         | 8         | 8  | 1 | 14 | 8 | 7  | 0 | 1328.7043800 | 1328.7048268 |
| -0.0004468 | -0.0004000 | 0.0000000 |    |   |    |   |    |   |              |              |
| 2218:      | 16         | 8         | 9  | 1 | 15 | 8 | 8  | 0 | 1328.9576900 | 1328.9576529 |
| 0.0000371  | -0.0004000 | 0.0000000 |    |   |    |   |    |   |              |              |
| 2219:      | 17         | 8         | 10 | 1 | 16 | 8 | 9  | 0 | 1329.2102700 | 1329.2103414 |
| -0.0000714 | -0.0004000 | 0.0000000 |    |   |    |   |    |   |              |              |
| 2220:      | 18         | 8         | 11 | 1 | 17 | 8 | 10 | 0 | 1329.4630600 | 1329.4628919 |
| 0.0001681  | -0.0004000 | 0.0000000 |    |   |    |   |    |   |              |              |
| 2221:      | 19         | 8         | 12 | 1 | 18 | 8 | 11 | 0 | 1329.7153000 | 1329.7153042 |
| -0.0000042 | -0.0004000 | 0.0000000 |    |   |    |   |    |   |              |              |
| 2222:      | 20         | 8         | 13 | 1 | 19 | 8 | 12 | 0 | 1329.9677700 | 1329.9675778 |
| 0.0001922  | -0.0004000 | 0.0000000 |    |   |    |   |    |   |              |              |
| 2223:      | 21         | 8         | 14 | 1 | 20 | 8 | 13 | 0 | 1330.2200000 | 1330.2197126 |
| 0.0002874  | -0.0004000 | 0.0000000 |    |   |    |   |    |   |              |              |
| 2224:      | 22         | 8         | 15 | 1 | 21 | 8 | 14 | 0 | 1330.4716800 | 1330.4717081 |
| -0.0000281 | -0.0004000 | 0.0000000 |    |   |    |   |    |   |              |              |
| 2225:      | 23         | 8         | 16 | 1 | 22 | 8 | 15 | 0 | 1330.7235000 | 1330.7235641 |
| -0.0000641 | -0.0004000 | 0.0000000 |    |   |    |   |    |   |              |              |
| 2226:      | 24         | 8         | 17 | 1 | 23 | 8 | 16 | 0 | 1330.9750500 | 1330.9752804 |
| -0.0002304 | -0.0004000 | 0.0000000 |    |   |    |   |    |   |              |              |
| 2227:      | 27         | 8         | 20 | 1 | 26 | 8 | 19 | 0 | 1331.7296300 | 1331.7295882 |
| 0.0000418  | -0.0004000 | 0.0000000 |    |   |    |   |    |   |              |              |
| 2228:      | 28         | 8         | 21 | 1 | 27 | 8 | 20 | 0 | 1331.9806300 | 1331.9807431 |
| -0.0001131 | -0.0004000 | 0.0000000 |    |   |    |   |    |   |              |              |
| 2229:      | 29         | 8         | 22 | 1 | 28 | 8 | 21 | 0 | 1332.2315500 | 1332.2317570 |
| -0.0002070 | -0.0004000 | 0.0000000 |    |   |    |   |    |   |              |              |
| 2230:      | 30         | 8         | 23 | 1 | 29 | 8 | 22 | 0 | 1332.4825300 | 1332.4826298 |
| -0.0000998 | -0.0004000 | 0.0000000 |    |   |    |   |    |   |              |              |
| 2231:      | 31         | 8         | 24 | 1 | 30 | 8 | 23 | 0 | 1332.7332900 | 1332.7333613 |
| -0.0000713 | -0.0004000 | 0.0000000 |    |   |    |   |    |   |              |              |
| 2232:      | 32         | 8         | 25 | 1 | 31 | 8 | 24 | 0 | 1332.9839800 | 1332.9839514 |
| 0.0000286  | -0.0004000 | 0.0000000 |    |   |    |   |    |   |              |              |
| 2233:      | 33         | 8         | 26 | 1 | 32 | 8 | 25 | 0 | 1333.2349500 | 1333.2343998 |
| 0.0005502  | -0.0004000 | 0.0000000 |    |   |    |   |    |   |              |              |
| 2234:      | 35         | 8         | 28 | 1 | 34 | 8 | 27 | 0 | 1333.7349600 | 1333.7348713 |
| 0.0000887  | -0.0004000 | 0.0000000 |    |   |    |   |    |   |              |              |
| 2235:      | 36         | 8         | 29 | 1 | 35 | 8 | 28 | 0 | 1333.9847500 | 1333.9848941 |
| -0.0001441 | -0.0004000 | 0.0000000 |    |   |    |   |    |   |              |              |
| 2236:      | 38         | 8         | 31 | 1 | 37 | 8 | 30 | 0 | 1334.4845400 | 1334.4845132 |
| 0.0000268  | -0.0004000 | 0.0000000 |    |   |    |   |    |   |              |              |
| 2237:      | 39         | 8         | 32 | 1 | 38 | 8 | 31 | 0 | 1334.7342800 | 1334.7341093 |
| 0.0001707  | -0.0004000 | 0.0000000 |    |   |    |   |    |   |              |              |
| 2238:      | 40         | 8         | 33 | 1 | 39 | 8 | 32 | 0 | 1334.9838600 | 1334.9835631 |
| 0.0002969  | -0.0004000 | 0.0000000 |    |   |    |   |    |   |              |              |
| 2239:      | 41         | 8         | 34 | 1 | 40 | 8 | 33 | 0 | 1335.2329100 | 1335.2328745 |
| 0.0000355  | -0.0004000 | 0.0000000 |    |   |    |   |    |   |              |              |
| 2240:      | 42         | 8         | 35 | 1 | 41 | 8 | 34 | 0 | 1335.4818400 | 1335.4820434 |

|            |            |           |              |              |
|------------|------------|-----------|--------------|--------------|
| -0.0002034 | -0.0004000 | 0.0000000 |              |              |
| 2241: 43   | 8 36       | 1 42      | 8 35         | 0            |
| 0.0000601  | -0.0004000 | 0.0000000 | 1335.7311300 | 1335.7310699 |
| 2242: 44   | 8 37       | 1 43      | 8 36         | 0            |
| 0.0000662  | -0.0004000 | 0.0000000 | 1335.9800200 | 1335.9799538 |
| 2243: 45   | 8 38       | 1 44      | 8 37         | 0            |
| 0.0000247  | -0.0004000 | 0.0000000 | 1336.2287200 | 1336.2286953 |
| 2244: 46   | 8 39       | 1 45      | 8 38         | 0            |
| -0.0000244 | -0.0004000 | 0.0000000 | 1336.4772700 | 1336.4772944 |
| 2245: 47   | 8 40       | 1 46      | 8 39         | 0            |
| -0.0000011 | -0.0004000 | 0.0000000 | 1336.7257500 | 1336.7257511 |
| 2246: 48   | 8 41       | 1 47      | 8 40         | 0            |
| -0.0000154 | -0.0004000 | 0.0000000 | 1336.9740500 | 1336.9740654 |
| 2247: 49   | 8 42       | 1 48      | 8 41         | 0            |
| 0.0001426  | -0.0004000 | 0.0000000 | 1337.2223800 | 1337.2222374 |
| 2248: 50   | 8 43       | 1 49      | 8 42         | 0            |
| -0.0000773 | -0.0004000 | 0.0000000 | 1337.4701900 | 1337.4702673 |
| 2249: 51   | 8 44       | 1 50      | 8 43         | 0            |
| -0.0003252 | -0.0004000 | 0.0000000 | 1337.7178300 | 1337.7181552 |
| 2250: 52   | 8 45       | 1 51      | 8 44         | 0            |
| -0.0000611 | -0.0004000 | 0.0000000 | 1337.9658400 | 1337.9659011 |
| 2251: 53   | 8 46       | 1 52      | 8 45         | 0            |
| -0.0000953 | -0.0004000 | 0.0000000 | 1338.2134100 | 1338.2135053 |
| 2252: 55   | 8 48       | 1 54      | 8 47         | 0            |
| -0.0000090 | -0.0004000 | 0.0000000 | 1338.7082800 | 1338.7082890 |
| 2253: 56   | 8 49       | 1 55      | 8 48         | 0            |
| 0.0000210  | -0.0004000 | 0.0000000 | 1338.9554900 | 1338.9554690 |
| 2254: 57   | 8 50       | 1 56      | 8 49         | 0            |
| -0.0002980 | -0.0004000 | 0.0000000 | 1339.2022100 | 1339.2025080 |
| 2255: 58   | 8 51       | 1 57      | 8 50         | 0            |
| 0.0000938  | -0.0004000 | 0.0000000 | 1339.4495000 | 1339.4494062 |
| 2256: 59   | 8 52       | 1 58      | 8 51         | 0            |
| -0.0000739 | -0.0004000 | 0.0000000 | 1339.6960900 | 1339.6961639 |
| 2257: 60   | 8 53       | 1 59      | 8 52         | 0            |
| -0.0001814 | -0.0004000 | 0.0000000 | 1339.9426000 | 1339.9427814 |
| 2258: 61   | 8 54       | 1 60      | 8 53         | 0            |
| 0.0003412  | -0.0004000 | 0.0000000 | 1340.1896000 | 1340.1892588 |
| 2259: 64   | 8 57       | 1 63      | 8 56         | 0            |
| -0.0000633 | -0.0004000 | 0.0000000 | 1340.9277900 | 1340.9278533 |
| 2260: 65   | 8 58       | 1 64      | 8 57         | 0            |
| 0.0002171  | -0.0004000 | 0.0000000 | 1341.1739900 | 1341.1737729 |
| 2261: 66   | 8 59       | 1 65      | 8 58         | 0            |
| 0.0000864  | -0.0004000 | 0.0000000 | 1341.4196400 | 1341.4195536 |
| 2262: 67   | 8 60       | 1 66      | 8 59         | 0            |
| -0.0000853 | -0.0004000 | 0.0000000 | 1341.6651100 | 1341.6651953 |
| 2263: 68   | 8 61       | 1 67      | 8 60         | 0            |
| -0.0000183 | -0.0004000 | 0.0000000 | 1341.9106800 | 1341.9106983 |
| 2264: 70   | 8 63       | 1 69      | 8 62         | 0            |
| 0.0001326  | -0.0004000 | 0.0000000 | 1342.4014200 | 1342.4012874 |
| 2265: 71   | 8 64       | 1 70      | 8 63         | 0            |
| 0.0003368  | -0.0004000 | 0.0000000 | 1342.6467100 | 1342.6463732 |
| 2266: 80   | 9 71       | 1 81      | 9 72         | 0            |
| -0.0001884 | -0.0004000 | 0.0000000 | 1303.7517900 | 1303.7519784 |
| 2267: 79   | 9 70       | 1 80      | 9 71         | 0            |
| 0.0003024  | -0.0004000 | 0.0000000 | 1304.0132900 | 1304.0129876 |
| 2268: 78   | 9 69       | 1 79      | 9 70         | 0            |
| -0.0001399 | -0.0004000 | 0.0000000 | 1304.2738500 | 1304.2739899 |
| 2269: 77   | 9 68       | 1 78      | 9 69         | 0            |
| -0.0007634 | -0.0004000 | 0.0000000 | 1304.5342200 | 1304.5349834 |
| 2270: 75   | 9 66       | 1 76      | 9 67         | 0            |
| -0.0003160 | -0.0004000 | 0.0000000 | 1305.0566200 | 1305.0569360 |
| 2271: 74   | 9 65       | 1 75      | 9 66         | 0            |
| -0.0004214 | -0.0004000 | 0.0000000 | 1305.3174700 | 1305.3178914 |
| 2272: 73   | 9 64       | 1 74      | 9 65         | 0            |
| -0.0001902 | -0.0004000 | 0.0000000 | 1305.5786400 | 1305.5788302 |

|            |            |           |    |   |    |   |    |   |              |              |
|------------|------------|-----------|----|---|----|---|----|---|--------------|--------------|
| 2273:      | 72         | 9         | 63 | 1 | 73 | 9 | 64 | 0 | 1305.8394800 | 1305.8397504 |
| -0.0002704 | -0.0004000 | 0.0000000 |    |   |    |   |    |   |              |              |
| 2274:      | 71         | 9         | 62 | 1 | 72 | 9 | 63 | 0 | 1306.1001400 | 1306.1006502 |
| -0.0005102 | -0.0004000 | 0.0000000 |    |   |    |   |    |   |              |              |
| 2275:      | 69         | 9         | 60 | 1 | 70 | 9 | 61 | 0 | 1306.6228800 | 1306.6223805 |
| 0.0004995  | -0.0004000 | 0.0000000 |    |   |    |   |    |   |              |              |
| 2276:      | 68         | 9         | 59 | 1 | 69 | 9 | 60 | 0 | 1306.8835700 | 1306.8832072 |
| 0.0003628  | -0.0004000 | 0.0000000 |    |   |    |   |    |   |              |              |
| 2277:      | 67         | 9         | 58 | 1 | 68 | 9 | 59 | 0 | 1307.1439600 | 1307.1440057 |
| -0.0000457 | -0.0004000 | 0.0000000 |    |   |    |   |    |   |              |              |
| 2278:      | 66         | 9         | 57 | 1 | 67 | 9 | 58 | 0 | 1307.4047900 | 1307.4047740 |
| 0.0000160  | -0.0004000 | 0.0000000 |    |   |    |   |    |   |              |              |
| 2279:      | 65         | 9         | 56 | 1 | 66 | 9 | 57 | 0 | 1307.6652100 | 1307.6655103 |
| -0.0003003 | -0.0004000 | 0.0000000 |    |   |    |   |    |   |              |              |
| 2280:      | 64         | 9         | 55 | 1 | 65 | 9 | 56 | 0 | 1307.9258800 | 1307.9262126 |
| -0.0003326 | -0.0004000 | 0.0000000 |    |   |    |   |    |   |              |              |
| 2281:      | 63         | 9         | 54 | 1 | 64 | 9 | 55 | 0 | 1308.1862100 | 1308.1868790 |
| -0.0006690 | -0.0004000 | 0.0000000 |    |   |    |   |    |   |              |              |
| 2282:      | 61         | 9         | 52 | 1 | 62 | 9 | 53 | 0 | 1308.7080900 | 1308.7080965 |
| -0.0000065 | -0.0004000 | 0.0000000 |    |   |    |   |    |   |              |              |
| 2283:      | 60         | 9         | 51 | 1 | 61 | 9 | 52 | 0 | 1308.9684700 | 1308.9686439 |
| -0.0001739 | -0.0004000 | 0.0000000 |    |   |    |   |    |   |              |              |
| 2284:      | 59         | 9         | 50 | 1 | 60 | 9 | 51 | 0 | 1309.2289200 | 1309.2291479 |
| -0.0002279 | -0.0004000 | 0.0000000 |    |   |    |   |    |   |              |              |
| 2285:      | 57         | 9         | 48 | 1 | 58 | 9 | 49 | 0 | 1309.7499900 | 1309.7500181 |
| -0.0000281 | -0.0004000 | 0.0000000 |    |   |    |   |    |   |              |              |
| 2286:      | 56         | 9         | 47 | 1 | 57 | 9 | 48 | 0 | 1310.0100900 | 1310.0103808 |
| -0.0002908 | -0.0004000 | 0.0000000 |    |   |    |   |    |   |              |              |
| 2287:      | 55         | 9         | 46 | 1 | 56 | 9 | 47 | 0 | 1310.2704800 | 1310.2706926 |
| -0.0002126 | -0.0004000 | 0.0000000 |    |   |    |   |    |   |              |              |
| 2288:      | 53         | 9         | 44 | 1 | 54 | 9 | 45 | 0 | 1310.7908900 | 1310.7911566 |
| -0.0002666 | -0.0004000 | 0.0000000 |    |   |    |   |    |   |              |              |
| 2289:      | 52         | 9         | 43 | 1 | 53 | 9 | 44 | 0 | 1311.0512900 | 1311.0513052 |
| -0.0000152 | -0.0004000 | 0.0000000 |    |   |    |   |    |   |              |              |
| 2290:      | 51         | 9         | 42 | 1 | 52 | 9 | 43 | 0 | 1311.3119200 | 1311.3113959 |
| 0.0005241  | -0.0004000 | 0.0000000 |    |   |    |   |    |   |              |              |
| 2291:      | 50         | 9         | 41 | 1 | 51 | 9 | 42 | 0 | 1311.5713300 | 1311.5714268 |
| -0.0000968 | -0.0004000 | 0.0000000 |    |   |    |   |    |   |              |              |
| 2292:      | 49         | 9         | 40 | 1 | 50 | 9 | 41 | 0 | 1311.8315600 | 1311.8313962 |
| 0.0001638  | -0.0004000 | 0.0000000 |    |   |    |   |    |   |              |              |
| 2293:      | 48         | 9         | 39 | 1 | 49 | 9 | 40 | 0 | 1312.0915300 | 1312.0913025 |
| 0.0002275  | -0.0004000 | 0.0000000 |    |   |    |   |    |   |              |              |
| 2294:      | 47         | 9         | 38 | 1 | 48 | 9 | 39 | 0 | 1312.3512200 | 1312.3511437 |
| 0.0000763  | -0.0004000 | 0.0000000 |    |   |    |   |    |   |              |              |
| 2295:      | 46         | 9         | 37 | 1 | 47 | 9 | 38 | 0 | 1312.6109700 | 1312.6109184 |
| 0.0000516  | -0.0004000 | 0.0000000 |    |   |    |   |    |   |              |              |
| 2296:      | 45         | 9         | 36 | 1 | 46 | 9 | 37 | 0 | 1312.8710000 | 1312.8706246 |
| 0.0003754  | -0.0004000 | 0.0000000 |    |   |    |   |    |   |              |              |
| 2297:      | 44         | 9         | 35 | 1 | 45 | 9 | 36 | 0 | 1313.1304700 | 1313.1302609 |
| 0.0002091  | -0.0004000 | 0.0000000 |    |   |    |   |    |   |              |              |
| 2298:      | 43         | 9         | 34 | 1 | 44 | 9 | 35 | 0 | 1313.3898600 | 1313.3898255 |
| 0.0000345  | -0.0004000 | 0.0000000 |    |   |    |   |    |   |              |              |
| 2299:      | 42         | 9         | 33 | 1 | 43 | 9 | 34 | 0 | 1313.6494000 | 1313.6493167 |
| 0.0000833  | -0.0004000 | 0.0000000 |    |   |    |   |    |   |              |              |
| 2300:      | 41         | 9         | 32 | 1 | 42 | 9 | 33 | 0 | 1313.9085500 | 1313.9087329 |
| -0.0001829 | -0.0004000 | 0.0000000 |    |   |    |   |    |   |              |              |
| 2301:      | 40         | 9         | 31 | 1 | 41 | 9 | 32 | 0 | 1314.1684000 | 1314.1680726 |
| 0.0003274  | -0.0004000 | 0.0000000 |    |   |    |   |    |   |              |              |
| 2302:      | 39         | 9         | 30 | 1 | 40 | 9 | 31 | 0 | 1314.4273000 | 1314.4273340 |
| -0.0000340 | -0.0004000 | 0.0000000 |    |   |    |   |    |   |              |              |
| 2303:      | 38         | 9         | 29 | 1 | 39 | 9 | 30 | 0 | 1314.6865400 | 1314.6865157 |
| 0.0000243  | -0.0004000 | 0.0000000 |    |   |    |   |    |   |              |              |
| 2304:      | 37         | 9         | 28 | 1 | 38 | 9 | 29 | 0 | 1314.9457400 | 1314.9456160 |
| 0.0001240  | -0.0004000 | 0.0000000 |    |   |    |   |    |   |              |              |
| 2305:      | 36         | 9         | 27 | 1 | 37 | 9 | 28 | 0 | 1315.2046800 | 1315.2046333 |



|            |            |           |              |              |
|------------|------------|-----------|--------------|--------------|
| 0.0000467  | -0.0004000 | 0.0000000 |              |              |
| 2306: 35   | 9 26 1 36  | 9 27 0    | 1315.4637600 | 1315.4635662 |
| 0.0001938  | -0.0004000 | 0.0000000 |              |              |
| 2307: 33   | 9 24 1 34  | 9 25 0    | 1315.9810500 | 1315.9811726 |
| -0.0001226 | -0.0004000 | 0.0000000 |              |              |
| 2308: 32   | 9 23 1 33  | 9 24 0    | 1316.2398500 | 1316.2398430 |
| 0.0000070  | -0.0004000 | 0.0000000 |              |              |
| 2309: 31   | 9 22 1 32  | 9 23 0    | 1316.4985600 | 1316.4984230 |
| 0.0001370  | -0.0004000 | 0.0000000 |              |              |
| 2310: 30   | 9 21 1 31  | 9 22 0    | 1316.7567400 | 1316.7569111 |
| -0.0001711 | -0.0004000 | 0.0000000 |              |              |
| 2311: 29   | 9 20 1 30  | 9 21 0    | 1317.0154300 | 1317.0153058 |
| 0.0001242  | -0.0004000 | 0.0000000 |              |              |
| 2312: 28   | 9 19 1 29  | 9 20 0    | 1317.2735500 | 1317.2736057 |
| -0.0000557 | -0.0004000 | 0.0000000 |              |              |
| 2313: 27   | 9 18 1 28  | 9 19 0    | 1317.5321300 | 1317.5318095 |
| 0.0003205  | -0.0004000 | 0.0000000 |              |              |
| 2314: 26   | 9 17 1 27  | 9 18 0    | 1317.7901500 | 1317.7899156 |
| 0.0002344  | -0.0004000 | 0.0000000 |              |              |
| 2315: 25   | 9 16 1 26  | 9 17 0    | 1318.0481100 | 1318.0479228 |
| 0.0001872  | -0.0004000 | 0.0000000 |              |              |
| 2316: 24   | 9 15 1 25  | 9 16 0    | 1318.3057200 | 1318.3058297 |
| -0.0001097 | -0.0004000 | 0.0000000 |              |              |
| 2317: 23   | 9 14 1 24  | 9 15 0    | 1318.5638900 | 1318.5636350 |
| 0.0002550  | -0.0004000 | 0.0000000 |              |              |
| 2318: 22   | 9 13 1 23  | 9 14 0    | 1318.8212700 | 1318.8213373 |
| -0.0000673 | -0.0004000 | 0.0000000 |              |              |
| 2319: 21   | 9 12 1 22  | 9 13 0    | 1319.0788800 | 1319.0789354 |
| -0.0000554 | -0.0004000 | 0.0000000 |              |              |
| 2320: 18   | 9 9 1 19   | 9 10 0    | 1319.8509200 | 1319.8510912 |
| -0.0001712 | -0.0004000 | 0.0000000 |              |              |
| 2321: 17   | 9 8 1 18   | 9 9 0     | 1320.1086900 | 1320.1082595 |
| 0.0004305  | -0.0004000 | 0.0000000 |              |              |
| 2322: 16   | 9 7 1 17   | 9 8 0     | 1320.3655900 | 1320.3653173 |
| 0.0002727  | -0.0004000 | 0.0000000 |              |              |
| 2323: 15   | 9 6 1 16   | 9 7 0     | 1320.6222700 | 1320.6222634 |
| 0.0000066  | -0.0004000 | 0.0000000 |              |              |
| 2324: 14   | 9 5 1 15   | 9 6 0     | 1320.8790800 | 1320.8790967 |
| -0.0000167 | -0.0004000 | 0.0000000 |              |              |
| 2325: 13   | 9 4 1 14   | 9 5 0     | 1321.1357600 | 1321.1358158 |
| -0.0000558 | -0.0004000 | 0.0000000 |              |              |
| 2326: 12   | 9 3 1 13   | 9 4 0     | 1321.3925700 | 1321.3924198 |
| 0.0001502  | -0.0004000 | 0.0000000 |              |              |
| 2327: 11   | 9 2 1 12   | 9 3 0     | 1321.6490500 | 1321.6489075 |
| 0.0001425  | -0.0004000 | 0.0000000 |              |              |
| 2328: 10   | 9 1 1 9    | 9 0 0     | 1327.2593700 | 1327.2601242 |
| -0.0007542 | -0.0004000 | 0.0000000 |              |              |
| 2329: 11   | 9 2 1 10   | 9 1 0     | 1327.5131200 | 1327.5136612 |
| -0.0005412 | -0.0004000 | 0.0000000 |              |              |
| 2330: 12   | 9 3 1 11   | 9 2 0     | 1327.7667400 | 1327.7670594 |
| -0.0003194 | -0.0004000 | 0.0000000 |              |              |
| 2331: 14   | 9 5 1 13   | 9 4 0     | 1328.2734300 | 1328.2734362 |
| -0.0000062 | -0.0004000 | 0.0000000 |              |              |
| 2332: 15   | 9 6 1 14   | 9 5 0     | 1328.5266200 | 1328.5264134 |
| 0.0002066  | -0.0004000 | 0.0000000 |              |              |
| 2333: 16   | 9 7 1 15   | 9 6 0     | 1328.7789900 | 1328.7792487 |
| -0.0002587 | -0.0004000 | 0.0000000 |              |              |
| 2334: 17   | 9 8 1 16   | 9 7 0     | 1329.0319500 | 1329.0319415 |
| 0.0000085  | -0.0004000 | 0.0000000 |              |              |
| 2335: 18   | 9 9 1 17   | 9 8 0     | 1329.2842100 | 1329.2844909 |
| -0.0002809 | -0.0004000 | 0.0000000 |              |              |
| 2336: 19   | 9 10 1 18  | 9 9 0     | 1329.5370900 | 1329.5368964 |
| 0.0001936  | -0.0004000 | 0.0000000 |              |              |
| 2337: 20   | 9 11 1 19  | 9 10 0    | 1329.7891900 | 1329.7891572 |
| 0.0000328  | -0.0004000 | 0.0000000 |              |              |

|            |                      |              |              |
|------------|----------------------|--------------|--------------|
| 2338: 21   | 9 12 1 20 9 11 0     | 1330.0410700 | 1330.0412725 |
| -0.0002025 | -0.0004000 0.0000000 |              |              |
| 2339: 22   | 9 13 1 21 9 12 0     | 1330.2931800 | 1330.2932418 |
| -0.0000618 | -0.0004000 0.0000000 |              |              |
| 2340: 23   | 9 14 1 22 9 13 0     | 1330.5452300 | 1330.5450643 |
| 0.0001657  | -0.0004000 0.0000000 |              |              |
| 2341: 24   | 9 15 1 23 9 14 0     | 1330.7967600 | 1330.7967394 |
| 0.0000206  | -0.0004000 0.0000000 |              |              |
| 2342: 25   | 9 16 1 24 9 15 0     | 1331.0484700 | 1331.0482664 |
| 0.0002036  | -0.0004000 0.0000000 |              |              |
| 2343: 27   | 9 18 1 26 9 17 0     | 1331.5509000 | 1331.5508734 |
| 0.0000266  | -0.0004000 0.0000000 |              |              |
| 2344: 28   | 9 19 1 27 9 18 0     | 1331.8016600 | 1331.8019522 |
| -0.0002922 | -0.0004000 0.0000000 |              |              |
| 2345: 30   | 9 21 1 29 9 20 0     | 1332.3038200 | 1332.3036571 |
| 0.0001629  | -0.0004000 0.0000000 |              |              |
| 2346: 31   | 9 22 1 30 9 21 0     | 1332.5542600 | 1332.5542820 |
| -0.0000220 | -0.0004000 0.0000000 |              |              |
| 2347: 32   | 9 23 1 31 9 22 0     | 1332.8046100 | 1332.8047543 |
| -0.0001443 | -0.0004000 0.0000000 |              |              |
| 2348: 33   | 9 24 1 32 9 23 0     | 1333.0552000 | 1333.0550734 |
| 0.0001266  | -0.0004000 0.0000000 |              |              |
| 2349: 34   | 9 25 1 33 9 24 0     | 1333.3056800 | 1333.3052388 |
| 0.0004412  | -0.0004000 0.0000000 |              |              |
| 2350: 35   | 9 26 1 34 9 25 0     | 1333.5551100 | 1333.5552498 |
| -0.0001398 | -0.0004000 0.0000000 |              |              |
| 2351: 37   | 9 28 1 36 9 27 0     | 1334.0548700 | 1334.0548064 |
| 0.0000636  | -0.0004000 0.0000000 |              |              |
| 2352: 38   | 9 29 1 37 9 28 0     | 1334.3043000 | 1334.3043508 |
| -0.0000508 | -0.0004000 0.0000000 |              |              |
| 2353: 39   | 9 30 1 38 9 29 0     | 1334.5535300 | 1334.5537385 |
| -0.0002085 | -0.0004000 0.0000000 |              |              |
| 2354: 40   | 9 31 1 39 9 30 0     | 1334.8029600 | 1334.8029690 |
| -0.0000090 | -0.0004000 0.0000000 |              |              |
| 2355: 41   | 9 32 1 40 9 31 0     | 1335.0519700 | 1335.0520415 |
| -0.0000715 | -0.0004000 0.0000000 |              |              |
| 2356: 42   | 9 33 1 41 9 32 0     | 1335.3006700 | 1335.3009557 |
| -0.0002857 | -0.0004000 0.0000000 |              |              |
| 2357: 43   | 9 34 1 42 9 33 0     | 1335.5490700 | 1335.5497110 |
| -0.0006410 | -0.0004000 0.0000000 |              |              |
| 2358: 44   | 9 35 1 43 9 34 0     | 1335.7975100 | 1335.7983067 |
| -0.0007967 | -0.0004000 0.0000000 |              |              |
| 2359: 45   | 9 36 1 44 9 35 0     | 1336.0468000 | 1336.0467423 |
| 0.0000577  | -0.0004000 0.0000000 |              |              |
| 2360: 46   | 9 37 1 45 9 36 0     | 1336.2949300 | 1336.2950174 |
| -0.0000874 | -0.0004000 0.0000000 |              |              |
| 2361: 50   | 9 41 1 49 9 40 0     | 1337.2865600 | 1337.2865014 |
| 0.0000586  | -0.0004000 0.0000000 |              |              |
| 2362: 51   | 9 42 1 50 9 41 0     | 1337.5341900 | 1337.5339658 |
| 0.0002242  | -0.0004000 0.0000000 |              |              |
| 2363: 52   | 9 43 1 51 9 42 0     | 1337.7815400 | 1337.7812665 |
| 0.0002735  | -0.0004000 0.0000000 |              |              |
| 2364: 53   | 9 44 1 52 9 43 0     | 1338.0281200 | 1338.0284030 |
| -0.0002830 | -0.0004000 0.0000000 |              |              |
| 2365: 55   | 9 46 1 54 9 45 0     | 1338.5220100 | 1338.5221818 |
| -0.0001718 | -0.0004000 0.0000000 |              |              |
| 2366: 56   | 9 47 1 55 9 46 0     | 1338.7686600 | 1338.7688232 |
| -0.0001632 | -0.0004000 0.0000000 |              |              |
| 2367: 57   | 9 48 1 56 9 47 0     | 1339.0149300 | 1339.0152985 |
| -0.0003685 | -0.0004000 0.0000000 |              |              |
| 2368: 58   | 9 49 1 57 9 48 0     | 1339.2613000 | 1339.2616075 |
| -0.0003075 | -0.0004000 0.0000000 |              |              |
| 2369: 59   | 9 50 1 58 9 49 0     | 1339.5072600 | 1339.5077497 |
| -0.0004897 | -0.0004000 0.0000000 |              |              |
| 2370: 60   | 9 51 1 59 9 50 0     | 1339.7536900 | 1339.7537247 |

|            |            |           |              |              |
|------------|------------|-----------|--------------|--------------|
| -0.0000347 | -0.0004000 | 0.0000000 |              |              |
| 2371: 62   | 9 53 1 61  | 9 52 0    | 1340.2451700 | 1340.2451715 |
| -0.0000015 | -0.0004000 | 0.0000000 |              |              |
| 2372: 63   | 9 54 1 62  | 9 53 0    | 1340.4904300 | 1340.4906427 |
| -0.0002127 | -0.0004000 | 0.0000000 |              |              |
| 2373: 64   | 9 55 1 63  | 9 54 0    | 1340.7363700 | 1340.7359453 |
| 0.0004247  | -0.0004000 | 0.0000000 |              |              |
| 2374: 65   | 9 56 1 64  | 9 55 0    | 1340.9810200 | 1340.9810790 |
| -0.0000590 | -0.0004000 | 0.0000000 |              |              |
| 2375: 66   | 9 57 1 65  | 9 56 0    | 1341.2265400 | 1341.2260436 |
| 0.0004964  | -0.0004000 | 0.0000000 |              |              |
| 2376: 67   | 9 58 1 66  | 9 57 0    | 1341.4704100 | 1341.4708389 |
| -0.0004289 | -0.0004000 | 0.0000000 |              |              |
| 2377: 68   | 9 59 1 67  | 9 58 0    | 1341.7155800 | 1341.7154645 |
| 0.0001155  | -0.0004000 | 0.0000000 |              |              |
| 2378: 69   | 9 60 1 68  | 9 59 0    | 1341.9602600 | 1341.9599205 |
| 0.0003395  | -0.0004000 | 0.0000000 |              |              |
| 2379: 70   | 9 61 1 69  | 9 60 0    | 1342.2042100 | 1342.2042067 |
| 0.0000033  | -0.0004000 | 0.0000000 |              |              |
| 2380: 71   | 9 62 1 70  | 9 61 0    | 1342.4483600 | 1342.4483231 |
| 0.0000369  | -0.0004000 | 0.0000000 |              |              |
| 2381: 72   | 9 63 1 71  | 9 62 0    | 1342.6922100 | 1342.6922696 |
| -0.0000596 | -0.0004000 | 0.0000000 |              |              |
| 2382: 74   | 9 65 1 73  | 9 64 0    | 1343.1798800 | 1343.1796534 |
| 0.0002266  | -0.0004000 | 0.0000000 |              |              |
| 2383: 76   | 9 67 1 75  | 9 66 0    | 1343.6661900 | 1343.6663596 |
| -0.0001696 | -0.0004000 | 0.0000000 |              |              |
| 2384: 77   | 9 68 1 76  | 9 67 0    | 1343.9093200 | 1343.9094595 |
| -0.0001395 | -0.0004000 | 0.0000000 |              |              |
| 2385: 79   | 9 70 1 78  | 9 69 0    | 1344.3951000 | 1344.3951554 |
| -0.0000554 | -0.0004000 | 0.0000000 |              |              |
| 2386: 81   | 9 72 1 80  | 9 71 0    | 1344.8794000 | 1344.8801846 |
| -0.0007846 | -0.0004000 | 0.0000000 |              |              |
| 2387: 82   | 9 73 1 81  | 9 72 0    | 1345.1222900 | 1345.1224518 |
| -0.0001618 | -0.0004000 | 0.0000000 |              |              |
| 2388: 83   | 9 74 1 82  | 9 73 0    | 1345.3643600 | 1345.3645557 |
| -0.0001957 | -0.0004000 | 0.0000000 |              |              |
| 2389: 84   | 9 75 1 83  | 9 74 0    | 1345.6060600 | 1345.6064980 |
| -0.0004380 | -0.0004000 | 0.0000000 |              |              |
| 2390: 80   | 9 72 1 81  | 9 73 0    | 1303.7517900 | 1303.7520555 |
| -0.0002655 | -0.0004000 | 0.0000000 |              |              |
| 2391: 79   | 9 71 1 80  | 9 72 0    | 1304.0132900 | 1304.0130518 |
| 0.0002382  | -0.0004000 | 0.0000000 |              |              |
| 2392: 78   | 9 70 1 79  | 9 71 0    | 1304.2738500 | 1304.2740432 |
| -0.0001932 | -0.0004000 | 0.0000000 |              |              |
| 2393: 77   | 9 69 1 78  | 9 70 0    | 1304.5342200 | 1304.5350275 |
| -0.0008075 | -0.0004000 | 0.0000000 |              |              |
| 2394: 75   | 9 67 1 76  | 9 68 0    | 1305.0566200 | 1305.0569660 |
| -0.0003460 | -0.0004000 | 0.0000000 |              |              |
| 2395: 74   | 9 66 1 75  | 9 67 0    | 1305.3174700 | 1305.3179159 |
| -0.0004459 | -0.0004000 | 0.0000000 |              |              |
| 2396: 73   | 9 65 1 74  | 9 66 0    | 1305.5786400 | 1305.5788502 |
| -0.0002102 | -0.0004000 | 0.0000000 |              |              |
| 2397: 72   | 9 64 1 73  | 9 65 0    | 1305.8394800 | 1305.8397667 |
| -0.0002867 | -0.0004000 | 0.0000000 |              |              |
| 2398: 71   | 9 63 1 72  | 9 64 0    | 1306.1001400 | 1306.1006634 |
| -0.0005234 | -0.0004000 | 0.0000000 |              |              |
| 2399: 69   | 9 61 1 70  | 9 62 0    | 1306.6228800 | 1306.6223891 |
| 0.0004909  | -0.0004000 | 0.0000000 |              |              |
| 2400: 68   | 9 60 1 69  | 9 61 0    | 1306.8835700 | 1306.8832141 |
| 0.0003559  | -0.0004000 | 0.0000000 |              |              |
| 2401: 67   | 9 59 1 68  | 9 60 0    | 1307.1439600 | 1307.1440112 |
| -0.0000512 | -0.0004000 | 0.0000000 |              |              |
| 2402: 66   | 9 58 1 67  | 9 59 0    | 1307.4047900 | 1307.4047784 |
| 0.0000116  | -0.0004000 | 0.0000000 |              |              |

|                                 |              |              |
|---------------------------------|--------------|--------------|
| 2403: 65 9 57 1 66 9 58 0       | 1307.6652100 | 1307.6655137 |
| -0.0003037 -0.0004000 0.0000000 |              |              |
| 2404: 64 9 56 1 65 9 57 0       | 1307.9258800 | 1307.9262153 |
| -0.0003353 -0.0004000 0.0000000 |              |              |
| 2405: 63 9 55 1 64 9 56 0       | 1308.1862100 | 1308.1868811 |
| -0.0006711 -0.0004000 0.0000000 |              |              |
| 2406: 61 9 53 1 62 9 54 0       | 1308.7080900 | 1308.7080978 |
| -0.0000078 -0.0004000 0.0000000 |              |              |
| 2407: 60 9 52 1 61 9 53 0       | 1308.9684700 | 1308.9686449 |
| -0.0001749 -0.0004000 0.0000000 |              |              |
| 2408: 59 9 51 1 60 9 52 0       | 1309.2289200 | 1309.2291486 |
| -0.0002286 -0.0004000 0.0000000 |              |              |
| 2409: 57 9 49 1 58 9 50 0       | 1309.7499900 | 1309.7500186 |
| -0.0000286 -0.0004000 0.0000000 |              |              |
| 2410: 56 9 48 1 57 9 49 0       | 1310.0100900 | 1310.0103811 |
| -0.0002911 -0.0004000 0.0000000 |              |              |
| 2411: 55 9 47 1 56 9 48 0       | 1310.2704800 | 1310.2706928 |
| -0.0002128 -0.0004000 0.0000000 |              |              |
| 2412: 53 9 45 1 54 9 46 0       | 1310.7908900 | 1310.7911567 |
| -0.0002667 -0.0004000 0.0000000 |              |              |
| 2413: 52 9 44 1 53 9 45 0       | 1311.0512900 | 1311.0513053 |
| -0.0000153 -0.0004000 0.0000000 |              |              |
| 2414: 51 9 43 1 52 9 44 0       | 1311.3119200 | 1311.3113960 |
| 0.0005240 -0.0004000 0.0000000  |              |              |
| 2415: 50 9 42 1 51 9 43 0       | 1311.5713300 | 1311.5714269 |
| -0.0000969 -0.0004000 0.0000000 |              |              |
| 2416: 49 9 41 1 50 9 42 0       | 1311.8315600 | 1311.8313963 |
| 0.0001637 -0.0004000 0.0000000  |              |              |
| 2417: 48 9 40 1 49 9 41 0       | 1312.0915300 | 1312.0913025 |
| 0.0002275 -0.0004000 0.0000000  |              |              |
| 2418: 47 9 39 1 48 9 40 0       | 1312.3512200 | 1312.3511438 |
| 0.0000762 -0.0004000 0.0000000  |              |              |
| 2419: 46 9 38 1 47 9 39 0       | 1312.6109700 | 1312.6109184 |
| 0.0000516 -0.0004000 0.0000000  |              |              |
| 2420: 45 9 37 1 46 9 38 0       | 1312.8710000 | 1312.8706247 |
| 0.0003753 -0.0004000 0.0000000  |              |              |
| 2421: 44 9 36 1 45 9 37 0       | 1313.1304700 | 1313.1302609 |
| 0.0002091 -0.0004000 0.0000000  |              |              |
| 2422: 43 9 35 1 44 9 36 0       | 1313.3898600 | 1313.3898255 |
| 0.0000345 -0.0004000 0.0000000  |              |              |
| 2423: 42 9 34 1 43 9 35 0       | 1313.6494000 | 1313.6493167 |
| 0.0000833 -0.0004000 0.0000000  |              |              |
| 2424: 41 9 33 1 42 9 34 0       | 1313.9085500 | 1313.9087329 |
| -0.0001829 -0.0004000 0.0000000 |              |              |
| 2425: 40 9 32 1 41 9 33 0       | 1314.1684000 | 1314.1680726 |
| 0.0003274 -0.0004000 0.0000000  |              |              |
| 2426: 39 9 31 1 40 9 32 0       | 1314.4273000 | 1314.4273340 |
| -0.0000340 -0.0004000 0.0000000 |              |              |
| 2427: 38 9 30 1 39 9 31 0       | 1314.6865400 | 1314.6865157 |
| 0.0000243 -0.0004000 0.0000000  |              |              |
| 2428: 37 9 29 1 38 9 30 0       | 1314.9457400 | 1314.9456160 |
| 0.0001240 -0.0004000 0.0000000  |              |              |
| 2429: 36 9 28 1 37 9 29 0       | 1315.2046800 | 1315.2046333 |
| 0.0000467 -0.0004000 0.0000000  |              |              |
| 2430: 35 9 27 1 36 9 28 0       | 1315.4637600 | 1315.4635662 |
| 0.0001938 -0.0004000 0.0000000  |              |              |
| 2431: 33 9 25 1 34 9 26 0       | 1315.9810500 | 1315.9811726 |
| -0.0001226 -0.0004000 0.0000000 |              |              |
| 2432: 32 9 24 1 33 9 25 0       | 1316.2398500 | 1316.2398430 |
| 0.0000070 -0.0004000 0.0000000  |              |              |
| 2433: 31 9 23 1 32 9 24 0       | 1316.4985600 | 1316.4984230 |
| 0.0001370 -0.0004000 0.0000000  |              |              |
| 2434: 30 9 22 1 31 9 23 0       | 1316.7567400 | 1316.7569111 |
| -0.0001711 -0.0004000 0.0000000 |              |              |
| 2435: 29 9 21 1 30 9 22 0       | 1317.0154300 | 1317.0153058 |

|            |                  |           |              |              |
|------------|------------------|-----------|--------------|--------------|
| 0.0001242  | -0.0004000       | 0.0000000 |              |              |
| 2436: 28   | 9 20 1 29 9 21 0 |           | 1317.2735500 | 1317.2736057 |
| -0.0000557 | -0.0004000       | 0.0000000 |              |              |
| 2437: 27   | 9 19 1 28 9 20 0 |           | 1317.5321300 | 1317.5318095 |
| 0.0003205  | -0.0004000       | 0.0000000 |              |              |
| 2438: 26   | 9 18 1 27 9 19 0 |           | 1317.7901500 | 1317.7899156 |
| 0.0002344  | -0.0004000       | 0.0000000 |              |              |
| 2439: 25   | 9 17 1 26 9 18 0 |           | 1318.0481100 | 1318.0479228 |
| 0.0001872  | -0.0004000       | 0.0000000 |              |              |
| 2440: 24   | 9 16 1 25 9 17 0 |           | 1318.3057200 | 1318.3058297 |
| -0.0001097 | -0.0004000       | 0.0000000 |              |              |
| 2441: 23   | 9 15 1 24 9 16 0 |           | 1318.5638900 | 1318.5636350 |
| 0.0002550  | -0.0004000       | 0.0000000 |              |              |
| 2442: 22   | 9 14 1 23 9 15 0 |           | 1318.8212700 | 1318.8213373 |
| -0.0000673 | -0.0004000       | 0.0000000 |              |              |
| 2443: 21   | 9 13 1 22 9 14 0 |           | 1319.0788800 | 1319.0789354 |
| -0.0000554 | -0.0004000       | 0.0000000 |              |              |
| 2444: 18   | 9 10 1 19 9 11 0 |           | 1319.8509200 | 1319.8510912 |
| -0.0001712 | -0.0004000       | 0.0000000 |              |              |
| 2445: 17   | 9 9 1 18 9 10 0  |           | 1320.1086900 | 1320.1082595 |
| 0.0004305  | -0.0004000       | 0.0000000 |              |              |
| 2446: 16   | 9 8 1 17 9 9 0   |           | 1320.3655900 | 1320.3653173 |
| 0.0002727  | -0.0004000       | 0.0000000 |              |              |
| 2447: 15   | 9 7 1 16 9 8 0   |           | 1320.6222700 | 1320.6222634 |
| 0.0000066  | -0.0004000       | 0.0000000 |              |              |
| 2448: 14   | 9 6 1 15 9 7 0   |           | 1320.8790800 | 1320.8790967 |
| -0.0000167 | -0.0004000       | 0.0000000 |              |              |
| 2449: 13   | 9 5 1 14 9 6 0   |           | 1321.1357600 | 1321.1358158 |
| -0.0000558 | -0.0004000       | 0.0000000 |              |              |
| 2450: 12   | 9 4 1 13 9 5 0   |           | 1321.3925700 | 1321.3924198 |
| 0.0001502  | -0.0004000       | 0.0000000 |              |              |
| 2451: 11   | 9 3 1 12 9 4 0   |           | 1321.6490500 | 1321.6489075 |
| 0.0001425  | -0.0004000       | 0.0000000 |              |              |
| 2452: 10   | 9 2 1 9 9 1 0    |           | 1327.2593700 | 1327.2601242 |
| -0.0007542 | -0.0004000       | 0.0000000 |              |              |
| 2453: 11   | 9 3 1 10 9 2 0   |           | 1327.5131200 | 1327.5136612 |
| -0.0005412 | -0.0004000       | 0.0000000 |              |              |
| 2454: 12   | 9 4 1 11 9 3 0   |           | 1327.7667400 | 1327.7670594 |
| -0.0003194 | -0.0004000       | 0.0000000 |              |              |
| 2455: 14   | 9 6 1 13 9 5 0   |           | 1328.2734300 | 1328.2734362 |
| -0.0000062 | -0.0004000       | 0.0000000 |              |              |
| 2456: 15   | 9 7 1 14 9 6 0   |           | 1328.5266200 | 1328.5264134 |
| 0.0002066  | -0.0004000       | 0.0000000 |              |              |
| 2457: 16   | 9 8 1 15 9 7 0   |           | 1328.7789900 | 1328.7792487 |
| -0.0002587 | -0.0004000       | 0.0000000 |              |              |
| 2458: 17   | 9 9 1 16 9 8 0   |           | 1329.0319500 | 1329.0319415 |
| 0.0000085  | -0.0004000       | 0.0000000 |              |              |
| 2459: 18   | 9 10 1 17 9 9 0  |           | 1329.2842100 | 1329.2844909 |
| -0.0002809 | -0.0004000       | 0.0000000 |              |              |
| 2460: 19   | 9 11 1 18 9 10 0 |           | 1329.5370900 | 1329.5368964 |
| 0.0001936  | -0.0004000       | 0.0000000 |              |              |
| 2461: 20   | 9 12 1 19 9 11 0 |           | 1329.7891900 | 1329.7891572 |
| 0.0000328  | -0.0004000       | 0.0000000 |              |              |
| 2462: 21   | 9 13 1 20 9 12 0 |           | 1330.0410700 | 1330.0412725 |
| -0.0002025 | -0.0004000       | 0.0000000 |              |              |
| 2463: 22   | 9 14 1 21 9 13 0 |           | 1330.2931800 | 1330.2932418 |
| -0.0000618 | -0.0004000       | 0.0000000 |              |              |
| 2464: 23   | 9 15 1 22 9 14 0 |           | 1330.5452300 | 1330.5450643 |
| 0.0001657  | -0.0004000       | 0.0000000 |              |              |
| 2465: 24   | 9 16 1 23 9 15 0 |           | 1330.7967600 | 1330.7967394 |
| 0.0000206  | -0.0004000       | 0.0000000 |              |              |
| 2466: 25   | 9 17 1 24 9 16 0 |           | 1331.0484700 | 1331.0482664 |
| 0.0002036  | -0.0004000       | 0.0000000 |              |              |
| 2467: 27   | 9 19 1 26 9 18 0 |           | 1331.5509000 | 1331.5508734 |
| 0.0000266  | -0.0004000       | 0.0000000 |              |              |

|            |            |           |    |   |    |   |    |   |              |              |
|------------|------------|-----------|----|---|----|---|----|---|--------------|--------------|
| 2468:      | 28         | 9         | 20 | 1 | 27 | 9 | 19 | 0 | 1331.8016600 | 1331.8019522 |
| -0.0002922 | -0.0004000 | 0.0000000 |    |   |    |   |    |   |              |              |
| 2469:      | 30         | 9         | 22 | 1 | 29 | 9 | 21 | 0 | 1332.3038200 | 1332.3036571 |
| 0.0001629  | -0.0004000 | 0.0000000 |    |   |    |   |    |   |              |              |
| 2470:      | 31         | 9         | 23 | 1 | 30 | 9 | 22 | 0 | 1332.5542600 | 1332.5542820 |
| -0.0000220 | -0.0004000 | 0.0000000 |    |   |    |   |    |   |              |              |
| 2471:      | 32         | 9         | 24 | 1 | 31 | 9 | 23 | 0 | 1332.8046100 | 1332.8047543 |
| -0.0001443 | -0.0004000 | 0.0000000 |    |   |    |   |    |   |              |              |
| 2472:      | 33         | 9         | 25 | 1 | 32 | 9 | 24 | 0 | 1333.0552000 | 1333.0550734 |
| 0.0001266  | -0.0004000 | 0.0000000 |    |   |    |   |    |   |              |              |
| 2473:      | 34         | 9         | 26 | 1 | 33 | 9 | 25 | 0 | 1333.3056800 | 1333.3052388 |
| 0.0004412  | -0.0004000 | 0.0000000 |    |   |    |   |    |   |              |              |
| 2474:      | 35         | 9         | 27 | 1 | 34 | 9 | 26 | 0 | 1333.5551100 | 1333.5552498 |
| -0.0001398 | -0.0004000 | 0.0000000 |    |   |    |   |    |   |              |              |
| 2475:      | 37         | 9         | 29 | 1 | 36 | 9 | 28 | 0 | 1334.0548700 | 1334.0548064 |
| 0.0000636  | -0.0004000 | 0.0000000 |    |   |    |   |    |   |              |              |
| 2476:      | 38         | 9         | 30 | 1 | 37 | 9 | 29 | 0 | 1334.3043000 | 1334.3043508 |
| -0.0000508 | -0.0004000 | 0.0000000 |    |   |    |   |    |   |              |              |
| 2477:      | 39         | 9         | 31 | 1 | 38 | 9 | 30 | 0 | 1334.5535300 | 1334.5537385 |
| -0.0002085 | -0.0004000 | 0.0000000 |    |   |    |   |    |   |              |              |
| 2478:      | 40         | 9         | 32 | 1 | 39 | 9 | 31 | 0 | 1334.8029600 | 1334.8029690 |
| -0.0000090 | -0.0004000 | 0.0000000 |    |   |    |   |    |   |              |              |
| 2479:      | 41         | 9         | 33 | 1 | 40 | 9 | 32 | 0 | 1335.0519700 | 1335.0520415 |
| -0.0000715 | -0.0004000 | 0.0000000 |    |   |    |   |    |   |              |              |
| 2480:      | 42         | 9         | 34 | 1 | 41 | 9 | 33 | 0 | 1335.3006700 | 1335.3009557 |
| -0.0002857 | -0.0004000 | 0.0000000 |    |   |    |   |    |   |              |              |
| 2481:      | 43         | 9         | 35 | 1 | 42 | 9 | 34 | 0 | 1335.5490700 | 1335.5497109 |
| -0.0006409 | -0.0004000 | 0.0000000 |    |   |    |   |    |   |              |              |
| 2482:      | 44         | 9         | 36 | 1 | 43 | 9 | 35 | 0 | 1335.7975100 | 1335.7983067 |
| -0.0007967 | -0.0004000 | 0.0000000 |    |   |    |   |    |   |              |              |
| 2483:      | 45         | 9         | 37 | 1 | 44 | 9 | 36 | 0 | 1336.0468000 | 1336.0467423 |
| 0.0000577  | -0.0004000 | 0.0000000 |    |   |    |   |    |   |              |              |
| 2484:      | 46         | 9         | 38 | 1 | 45 | 9 | 37 | 0 | 1336.2949300 | 1336.2950174 |
| -0.0000874 | -0.0004000 | 0.0000000 |    |   |    |   |    |   |              |              |
| 2485:      | 50         | 9         | 42 | 1 | 49 | 9 | 41 | 0 | 1337.2865600 | 1337.2865014 |
| 0.0000586  | -0.0004000 | 0.0000000 |    |   |    |   |    |   |              |              |
| 2486:      | 51         | 9         | 43 | 1 | 50 | 9 | 42 | 0 | 1337.5341900 | 1337.5339657 |
| 0.0002243  | -0.0004000 | 0.0000000 |    |   |    |   |    |   |              |              |
| 2487:      | 52         | 9         | 44 | 1 | 51 | 9 | 43 | 0 | 1337.7815400 | 1337.7812663 |
| 0.0002737  | -0.0004000 | 0.0000000 |    |   |    |   |    |   |              |              |
| 2488:      | 53         | 9         | 45 | 1 | 52 | 9 | 44 | 0 | 1338.0281200 | 1338.0284028 |
| -0.0002828 | -0.0004000 | 0.0000000 |    |   |    |   |    |   |              |              |
| 2489:      | 55         | 9         | 47 | 1 | 54 | 9 | 46 | 0 | 1338.5220100 | 1338.5221814 |
| -0.0001714 | -0.0004000 | 0.0000000 |    |   |    |   |    |   |              |              |
| 2490:      | 56         | 9         | 48 | 1 | 55 | 9 | 47 | 0 | 1338.7686600 | 1338.7688226 |
| -0.0001626 | -0.0004000 | 0.0000000 |    |   |    |   |    |   |              |              |
| 2491:      | 57         | 9         | 49 | 1 | 56 | 9 | 48 | 0 | 1339.0149300 | 1339.0152978 |
| -0.0003678 | -0.0004000 | 0.0000000 |    |   |    |   |    |   |              |              |
| 2492:      | 58         | 9         | 50 | 1 | 57 | 9 | 49 | 0 | 1339.2613000 | 1339.2616065 |
| -0.0003065 | -0.0004000 | 0.0000000 |    |   |    |   |    |   |              |              |
| 2493:      | 59         | 9         | 51 | 1 | 58 | 9 | 50 | 0 | 1339.5072600 | 1339.5077483 |
| -0.0004883 | -0.0004000 | 0.0000000 |    |   |    |   |    |   |              |              |
| 2494:      | 60         | 9         | 52 | 1 | 59 | 9 | 51 | 0 | 1339.7536900 | 1339.7537228 |
| -0.0000328 | -0.0004000 | 0.0000000 |    |   |    |   |    |   |              |              |
| 2495:      | 62         | 9         | 54 | 1 | 61 | 9 | 53 | 0 | 1340.2451700 | 1340.2451683 |
| 0.0000017  | -0.0004000 | 0.0000000 |    |   |    |   |    |   |              |              |
| 2496:      | 63         | 9         | 55 | 1 | 62 | 9 | 54 | 0 | 1340.4904300 | 1340.4906385 |
| -0.0002085 | -0.0004000 | 0.0000000 |    |   |    |   |    |   |              |              |
| 2497:      | 64         | 9         | 56 | 1 | 63 | 9 | 55 | 0 | 1340.7363700 | 1340.7359399 |
| 0.0004301  | -0.0004000 | 0.0000000 |    |   |    |   |    |   |              |              |
| 2498:      | 65         | 9         | 57 | 1 | 64 | 9 | 56 | 0 | 1340.9810200 | 1340.9810720 |
| -0.0000520 | -0.0004000 | 0.0000000 |    |   |    |   |    |   |              |              |
| 2499:      | 66         | 9         | 58 | 1 | 65 | 9 | 57 | 0 | 1341.2265400 | 1341.2260345 |
| 0.0005055  | -0.0004000 | 0.0000000 |    |   |    |   |    |   |              |              |
| 2500:      | 67         | 9         | 59 | 1 | 66 | 9 | 58 | 0 | 1341.4704100 | 1341.4708271 |

|            |                    |           |              |              |
|------------|--------------------|-----------|--------------|--------------|
| -0.0004171 | -0.0004000         | 0.0000000 |              |              |
| 2501: 68   | 9 60 1 67 9 59 0   |           | 1341.7155800 | 1341.7154495 |
| 0.0001305  | -0.0004000         | 0.0000000 |              |              |
| 2502: 69   | 9 61 1 68 9 60 0   |           | 1341.9602600 | 1341.9599013 |
| 0.0003587  | -0.0004000         | 0.0000000 |              |              |
| 2503: 70   | 9 62 1 69 9 61 0   |           | 1342.2042100 | 1342.2041823 |
| 0.0000277  | -0.0004000         | 0.0000000 |              |              |
| 2504: 71   | 9 63 1 70 9 62 0   |           | 1342.4483600 | 1342.4482922 |
| 0.0000678  | -0.0004000         | 0.0000000 |              |              |
| 2505: 72   | 9 64 1 71 9 63 0   |           | 1342.6922100 | 1342.6922306 |
| -0.0000206 | -0.0004000         | 0.0000000 |              |              |
| 2506: 74   | 9 66 1 73 9 65 0   |           | 1343.1798800 | 1343.1795919 |
| 0.0002881  | -0.0004000         | 0.0000000 |              |              |
| 2507: 76   | 9 68 1 75 9 67 0   |           | 1343.6661900 | 1343.6662642 |
| -0.0000742 | -0.0004000         | 0.0000000 |              |              |
| 2508: 77   | 9 69 1 76 9 68 0   |           | 1343.9093200 | 1343.9093411 |
| -0.0000211 | -0.0004000         | 0.0000000 |              |              |
| 2509: 79   | 9 71 1 78 9 70 0   |           | 1344.3951000 | 1344.3949750 |
| 0.0001250  | -0.0004000         | 0.0000000 |              |              |
| 2510: 81   | 9 73 1 80 9 72 0   |           | 1344.8794000 | 1344.8799133 |
| -0.0005133 | -0.0004000         | 0.0000000 |              |              |
| 2511: 82   | 9 74 1 81 9 73 0   |           | 1345.1222900 | 1345.1221205 |
| 0.0001695  | -0.0004000         | 0.0000000 |              |              |
| 2512: 83   | 9 75 1 82 9 74 0   |           | 1345.3643600 | 1345.3641523 |
| 0.0002077  | -0.0004000         | 0.0000000 |              |              |
| 2513: 84   | 9 76 1 83 9 75 0   |           | 1345.6060600 | 1345.6060083 |
| 0.0000517  | -0.0004000         | 0.0000000 |              |              |
| 2514: 78   | 10 68 1 79 10 69 0 |           | 1304.0808800 | 1304.0812779 |
| -0.0003979 | -0.0004000         | 0.0000000 |              |              |
| 2515: 77   | 10 67 1 78 10 68 0 |           | 1304.3418600 | 1304.3420133 |
| -0.0001533 | -0.0004000         | 0.0000000 |              |              |
| 2516: 76   | 10 66 1 77 10 67 0 |           | 1304.6025700 | 1304.6027421 |
| -0.0001721 | -0.0004000         | 0.0000000 |              |              |
| 2517: 75   | 10 65 1 76 10 66 0 |           | 1304.8636300 | 1304.8634623 |
| 0.0001677  | -0.0004000         | 0.0000000 |              |              |
| 2518: 73   | 10 63 1 74 10 64 0 |           | 1305.3852800 | 1305.3848694 |
| 0.0004106  | -0.0004000         | 0.0000000 |              |              |
| 2519: 72   | 10 62 1 73 10 63 0 |           | 1305.6456500 | 1305.6455523 |
| 0.0000977  | -0.0004000         | 0.0000000 |              |              |
| 2520: 71   | 10 61 1 72 10 62 0 |           | 1305.9057600 | 1305.9062189 |
| -0.0004589 | -0.0004000         | 0.0000000 |              |              |
| 2521: 70   | 10 60 1 71 10 61 0 |           | 1306.1664300 | 1306.1668674 |
| -0.0004374 | -0.0004000         | 0.0000000 |              |              |
| 2522: 69   | 10 59 1 70 10 60 0 |           | 1306.4269500 | 1306.4274956 |
| -0.0005456 | -0.0004000         | 0.0000000 |              |              |
| 2523: 68   | 10 58 1 69 10 59 0 |           | 1306.6877300 | 1306.6881019 |
| -0.0003719 | -0.0004000         | 0.0000000 |              |              |
| 2524: 67   | 10 57 1 68 10 58 0 |           | 1306.9484700 | 1306.9486842 |
| -0.0002142 | -0.0004000         | 0.0000000 |              |              |
| 2525: 66   | 10 56 1 67 10 57 0 |           | 1307.2095100 | 1307.2092408 |
| 0.0002692  | -0.0004000         | 0.0000000 |              |              |
| 2526: 65   | 10 55 1 66 10 56 0 |           | 1307.4694400 | 1307.4697696 |
| -0.0003296 | -0.0004000         | 0.0000000 |              |              |
| 2527: 61   | 10 51 1 62 10 52 0 |           | 1308.5114400 | 1308.5115705 |
| -0.0001305 | -0.0004000         | 0.0000000 |              |              |
| 2528: 60   | 10 50 1 61 10 51 0 |           | 1308.7720100 | 1308.7719328 |
| 0.0000772  | -0.0004000         | 0.0000000 |              |              |
| 2529: 53   | 10 43 1 54 10 44 0 |           | 1310.5935600 | 1310.5932811 |
| 0.0002789  | -0.0004000         | 0.0000000 |              |              |
| 2530: 52   | 10 42 1 53 10 43 0 |           | 1310.8529000 | 1310.8532824 |
| -0.0003824 | -0.0004000         | 0.0000000 |              |              |
| 2531: 51   | 10 41 1 52 10 42 0 |           | 1311.1130200 | 1311.1132306 |
| -0.0002106 | -0.0004000         | 0.0000000 |              |              |
| 2532: 49   | 10 39 1 50 10 40 0 |           | 1311.6327200 | 1311.6329607 |
| -0.0002407 | -0.0004000         | 0.0000000 |              |              |

|            |            |           |    |   |    |    |    |   |              |              |
|------------|------------|-----------|----|---|----|----|----|---|--------------|--------------|
| 2533:      | 48         | 10        | 38 | 1 | 49 | 10 | 39 | 0 | 1311.8924600 | 1311.8927390 |
| -0.0002790 | -0.0004000 | 0.0000000 |    |   |    |    |    |   |              |              |
| 2534:      | 47         | 10        | 37 | 1 | 48 | 10 | 38 | 0 | 1312.1525000 | 1312.1524574 |
| 0.0000426  | -0.0004000 | 0.0000000 |    |   |    |    |    |   |              |              |
| 2535:      | 46         | 10        | 36 | 1 | 47 | 10 | 37 | 0 | 1312.4118200 | 1312.4121139 |
| -0.0002939 | -0.0004000 | 0.0000000 |    |   |    |    |    |   |              |              |
| 2536:      | 43         | 10        | 33 | 1 | 44 | 10 | 34 | 0 | 1313.1910200 | 1313.1906964 |
| 0.0003236  | -0.0004000 | 0.0000000 |    |   |    |    |    |   |              |              |
| 2537:      | 41         | 10        | 31 | 1 | 42 | 10 | 32 | 0 | 1313.7097500 | 1313.7094119 |
| 0.0003381  | -0.0004000 | 0.0000000 |    |   |    |    |    |   |              |              |
| 2538:      | 40         | 10        | 30 | 1 | 41 | 10 | 31 | 0 | 1313.9686000 | 1313.9686628 |
| -0.0000628 | -0.0004000 | 0.0000000 |    |   |    |    |    |   |              |              |
| 2539:      | 39         | 10        | 29 | 1 | 40 | 10 | 30 | 0 | 1314.2281500 | 1314.2278405 |
| 0.0003095  | -0.0004000 | 0.0000000 |    |   |    |    |    |   |              |              |
| 2540:      | 38         | 10        | 28 | 1 | 39 | 10 | 29 | 0 | 1314.4868400 | 1314.4869432 |
| -0.0001032 | -0.0004000 | 0.0000000 |    |   |    |    |    |   |              |              |
| 2541:      | 37         | 10        | 27 | 1 | 38 | 10 | 28 | 0 | 1314.7459700 | 1314.7459693 |
| 0.0000007  | -0.0004000 | 0.0000000 |    |   |    |    |    |   |              |              |
| 2542:      | 36         | 10        | 26 | 1 | 37 | 10 | 27 | 0 | 1315.0053300 | 1315.0049172 |
| 0.0004128  | -0.0004000 | 0.0000000 |    |   |    |    |    |   |              |              |
| 2543:      | 31         | 10        | 21 | 1 | 32 | 10 | 22 | 0 | 1316.2985900 | 1316.2984303 |
| 0.0001597  | -0.0004000 | 0.0000000 |    |   |    |    |    |   |              |              |
| 2544:      | 30         | 10        | 20 | 1 | 31 | 10 | 21 | 0 | 1316.5569600 | 1316.5568768 |
| 0.0000832  | -0.0004000 | 0.0000000 |    |   |    |    |    |   |              |              |
| 2545:      | 29         | 10        | 19 | 1 | 30 | 10 | 20 | 0 | 1316.8148900 | 1316.8152344 |
| -0.0003444 | -0.0004000 | 0.0000000 |    |   |    |    |    |   |              |              |
| 2546:      | 28         | 10        | 18 | 1 | 29 | 10 | 19 | 0 | 1317.0735300 | 1317.0735016 |
| 0.0000284  | -0.0004000 | 0.0000000 |    |   |    |    |    |   |              |              |
| 2547:      | 27         | 10        | 17 | 1 | 28 | 10 | 18 | 0 | 1317.3321400 | 1317.3316770 |
| 0.0004630  | -0.0004000 | 0.0000000 |    |   |    |    |    |   |              |              |
| 2548:      | 26         | 10        | 16 | 1 | 27 | 10 | 17 | 0 | 1317.5900700 | 1317.5897590 |
| 0.0003110  | -0.0004000 | 0.0000000 |    |   |    |    |    |   |              |              |
| 2549:      | 25         | 10        | 15 | 1 | 26 | 10 | 16 | 0 | 1317.8474600 | 1317.8477462 |
| -0.0002862 | -0.0004000 | 0.0000000 |    |   |    |    |    |   |              |              |
| 2550:      | 24         | 10        | 14 | 1 | 25 | 10 | 15 | 0 | 1318.1054200 | 1318.1056373 |
| -0.0002173 | -0.0004000 | 0.0000000 |    |   |    |    |    |   |              |              |
| 2551:      | 23         | 10        | 13 | 1 | 24 | 10 | 14 | 0 | 1318.3631400 | 1318.3634307 |
| -0.0002907 | -0.0004000 | 0.0000000 |    |   |    |    |    |   |              |              |
| 2552:      | 22         | 10        | 12 | 1 | 23 | 10 | 13 | 0 | 1318.6211800 | 1318.6211251 |
| 0.0000549  | -0.0004000 | 0.0000000 |    |   |    |    |    |   |              |              |
| 2553:      | 21         | 10        | 11 | 1 | 22 | 10 | 12 | 0 | 1318.8785800 | 1318.8787190 |
| -0.0001390 | -0.0004000 | 0.0000000 |    |   |    |    |    |   |              |              |
| 2554:      | 17         | 10        | 7  | 1 | 18 | 10 | 8  | 0 | 1319.9084700 | 1319.9080628 |
| 0.0004072  | -0.0004000 | 0.0000000 |    |   |    |    |    |   |              |              |
| 2555:      | 16         | 10        | 6  | 1 | 17 | 10 | 7  | 0 | 1320.1653200 | 1320.1651341 |
| 0.0001859  | -0.0004000 | 0.0000000 |    |   |    |    |    |   |              |              |
| 2556:      | 15         | 10        | 5  | 1 | 16 | 10 | 6  | 0 | 1320.4223300 | 1320.4220968 |
| 0.0002332  | -0.0004000 | 0.0000000 |    |   |    |    |    |   |              |              |
| 2557:      | 13         | 10        | 3  | 1 | 14 | 10 | 4  | 0 | 1320.9358600 | 1320.9356912 |
| 0.0001688  | -0.0004000 | 0.0000000 |    |   |    |    |    |   |              |              |
| 2558:      | 12         | 10        | 2  | 1 | 13 | 10 | 3  | 0 | 1321.1924100 | 1321.1923205 |
| 0.0000895  | -0.0004000 | 0.0000000 |    |   |    |    |    |   |              |              |
| 2559:      | 11         | 10        | 1  | 1 | 12 | 10 | 2  | 0 | 1321.4489700 | 1321.4488360 |
| 0.0001340  | -0.0004000 | 0.0000000 |    |   |    |    |    |   |              |              |
| 2560:      | 13         | 10        | 3  | 1 | 12 | 10 | 2  | 0 | 1327.8214200 | 1327.8212835 |
| 0.0001365  | -0.0004000 | 0.0000000 |    |   |    |    |    |   |              |              |
| 2561:      | 14         | 10        | 4  | 1 | 13 | 10 | 3  | 0 | 1328.0743700 | 1328.0744330 |
| -0.0000630 | -0.0004000 | 0.0000000 |    |   |    |    |    |   |              |              |
| 2562:      | 16         | 10        | 6  | 1 | 15 | 10 | 5  | 0 | 1328.5806600 | 1328.5802991 |
| 0.0003609  | -0.0004000 | 0.0000000 |    |   |    |    |    |   |              |              |
| 2563:      | 17         | 10        | 7  | 1 | 16 | 10 | 6  | 0 | 1328.8332600 | 1328.8330137 |
| 0.0002463  | -0.0004000 | 0.0000000 |    |   |    |    |    |   |              |              |
| 2564:      | 18         | 10        | 8  | 1 | 17 | 10 | 7  | 0 | 1329.0856900 | 1329.0855813 |
| 0.0001087  | -0.0004000 | 0.0000000 |    |   |    |    |    |   |              |              |
| 2565:      | 19         | 10        | 9  | 1 | 18 | 10 | 8  | 0 | 1329.3379800 | 1329.3380010 |



|            |            |           |              |              |
|------------|------------|-----------|--------------|--------------|
| -0.0000210 | -0.0004000 | 0.0000000 |              |              |
| 2566:      | 20         | 10        | 10           | 1 19 10 9 0  |
| -0.0000918 | -0.0004000 | 0.0000000 | 1329.5901800 | 1329.5902718 |
| 2567:      | 22         | 10        | 12           | 1 21 10 11 0 |
| 0.0001872  | -0.0004000 | 0.0000000 | 1330.0945500 | 1330.0943628 |
| 2568:      | 23         | 10        | 13           | 1 22 10 12 0 |
| 0.0002089  | -0.0004000 | 0.0000000 | 1330.3463900 | 1330.3461811 |
| 2569:      | 24         | 10        | 14           | 1 23 10 13 0 |
| -0.0002766 | -0.0004000 | 0.0000000 | 1330.5975700 | 1330.5978466 |
| 2570:      | 25         | 10        | 15           | 1 24 10 14 0 |
| 0.0000716  | -0.0004000 | 0.0000000 | 1330.8494300 | 1330.8493584 |
| 2571:      | 26         | 10        | 16           | 1 25 10 15 0 |
| 0.0001744  | -0.0004000 | 0.0000000 | 1331.1008900 | 1331.1007156 |
| 2572:      | 27         | 10        | 17           | 1 26 10 16 0 |
| 0.0000028  | -0.0004000 | 0.0000000 | 1331.3519200 | 1331.3519172 |
| 2573:      | 28         | 10        | 18           | 1 27 10 17 0 |
| 0.0000478  | -0.0004000 | 0.0000000 | 1331.6030100 | 1331.6029622 |
| 2574:      | 29         | 10        | 19           | 1 28 10 18 0 |
| 0.0001602  | -0.0004000 | 0.0000000 | 1331.8540100 | 1331.8538498 |
| 2575:      | 30         | 10        | 20           | 1 29 10 19 0 |
| 0.0000010  | -0.0004000 | 0.0000000 | 1332.1045800 | 1332.1045790 |
| 2576:      | 31         | 10        | 21           | 1 30 10 20 0 |
| 0.0000812  | -0.0004000 | 0.0000000 | 1332.3552300 | 1332.3551488 |
| 2577:      | 34         | 10        | 24           | 1 33 10 23 0 |
| 0.0002669  | -0.0004000 | 0.0000000 | 1333.1061600 | 1333.1058931 |
| 2578:      | 35         | 10        | 25           | 1 34 10 24 0 |
| -0.0003664 | -0.0004000 | 0.0000000 | 1333.3554500 | 1333.3558164 |
| 2579:      | 36         | 10        | 26           | 1 35 10 25 0 |
| -0.0000858 | -0.0004000 | 0.0000000 | 1333.6054900 | 1333.6055758 |
| 2580:      | 37         | 10        | 27           | 1 36 10 26 0 |
| 0.0005698  | -0.0004000 | 0.0000000 | 1333.8557400 | 1333.8551702 |
| 2581:      | 38         | 10        | 28           | 1 37 10 27 0 |
| 0.0002411  | -0.0004000 | 0.0000000 | 1334.1048400 | 1334.1045989 |
| 2582:      | 39         | 10        | 29           | 1 38 10 28 0 |
| 0.0005891  | -0.0004000 | 0.0000000 | 1334.3544500 | 1334.3538609 |
| 2583:      | 40         | 10        | 30           | 1 39 10 29 0 |
| 0.0001847  | -0.0004000 | 0.0000000 | 1334.6031400 | 1334.6029553 |
| 2584:      | 42         | 10        | 32           | 1 41 10 31 0 |
| -0.0000477 | -0.0004000 | 0.0000000 | 1335.1005900 | 1335.1006377 |
| 2585:      | 43         | 10        | 33           | 1 42 10 32 0 |
| -0.0001038 | -0.0004000 | 0.0000000 | 1335.3491200 | 1335.3492238 |
| 2586:      | 44         | 10        | 34           | 1 43 10 33 0 |
| 0.0002413  | -0.0004000 | 0.0000000 | 1335.5978800 | 1335.5976387 |
| 2587:      | 45         | 10        | 35           | 1 44 10 34 0 |
| -0.0001014 | -0.0004000 | 0.0000000 | 1335.8457800 | 1335.8458814 |
| 2588:      | 46         | 10        | 36           | 1 45 10 35 0 |
| -0.0001810 | -0.0004000 | 0.0000000 | 1336.0937700 | 1336.0939510 |
| 2589:      | 47         | 10        | 37           | 1 46 10 36 0 |
| -0.0001667 | -0.0004000 | 0.0000000 | 1336.3416800 | 1336.3418467 |
| 2590:      | 48         | 10        | 38           | 1 47 10 37 0 |
| -0.0001175 | -0.0004000 | 0.0000000 | 1336.5894500 | 1336.5895675 |
| 2591:      | 49         | 10        | 39           | 1 48 10 38 0 |
| 0.0000175  | -0.0004000 | 0.0000000 | 1336.8371300 | 1336.8371125 |
| 2592:      | 50         | 10        | 40           | 1 49 10 39 0 |
| -0.0000708 | -0.0004000 | 0.0000000 | 1337.0844100 | 1337.0844808 |
| 2593:      | 51         | 10        | 41           | 1 50 10 40 0 |
| 0.0001285  | -0.0004000 | 0.0000000 | 1337.3318000 | 1337.3316715 |
| 2594:      | 52         | 10        | 42           | 1 51 10 41 0 |
| -0.0001638 | -0.0004000 | 0.0000000 | 1337.5785200 | 1337.5786838 |
| 2595:      | 53         | 10        | 43           | 1 52 10 42 0 |
| -0.0000766 | -0.0004000 | 0.0000000 | 1337.8254400 | 1337.8255166 |
| 2596:      | 54         | 10        | 44           | 1 53 10 43 0 |
| -0.0001091 | -0.0004000 | 0.0000000 | 1338.0720600 | 1338.0721691 |
| 2597:      | 55         | 10        | 45           | 1 54 10 44 0 |
| -0.0001903 | -0.0004000 | 0.0000000 | 1338.3184500 | 1338.3186403 |

|            |            |           |    |   |    |    |    |   |              |              |
|------------|------------|-----------|----|---|----|----|----|---|--------------|--------------|
| 2598:      | 57         | 10        | 47 | 1 | 56 | 10 | 46 | 0 | 1338.8113300 | 1338.8110356 |
| 0.0002944  | -0.0004000 | 0.0000000 |    |   |    |    |    |   |              |              |
| 2599:      | 59         | 10        | 49 | 1 | 58 | 10 | 48 | 0 | 1339.3024300 | 1339.3026952 |
| -0.0002652 | -0.0004000 | 0.0000000 |    |   |    |    |    |   |              |              |
| 2600:      | 60         | 10        | 50 | 1 | 59 | 10 | 49 | 0 | 1339.5480500 | 1339.5482469 |
| -0.0001969 | -0.0004000 | 0.0000000 |    |   |    |    |    |   |              |              |
| 2601:      | 62         | 10        | 52 | 1 | 61 | 10 | 51 | 0 | 1340.0388600 | 1340.0387895 |
| 0.0000705  | -0.0004000 | 0.0000000 |    |   |    |    |    |   |              |              |
| 2602:      | 63         | 10        | 53 | 1 | 62 | 10 | 52 | 0 | 1340.2837300 | 1340.2837786 |
| -0.0000486 | -0.0004000 | 0.0000000 |    |   |    |    |    |   |              |              |
| 2603:      | 66         | 10        | 56 | 1 | 65 | 10 | 55 | 0 | 1341.0176100 | 1341.0176068 |
| 0.0000032  | -0.0004000 | 0.0000000 |    |   |    |    |    |   |              |              |
| 2604:      | 67         | 10        | 57 | 1 | 66 | 10 | 56 | 0 | 1341.2618200 | 1341.2618335 |
| -0.0000135 | -0.0004000 | 0.0000000 |    |   |    |    |    |   |              |              |
| 2605:      | 68         | 10        | 58 | 1 | 67 | 10 | 57 | 0 | 1341.5058200 | 1341.5058674 |
| -0.0000474 | -0.0004000 | 0.0000000 |    |   |    |    |    |   |              |              |
| 2606:      | 69         | 10        | 59 | 1 | 68 | 10 | 58 | 0 | 1341.7497300 | 1341.7497076 |
| 0.0000224  | -0.0004000 | 0.0000000 |    |   |    |    |    |   |              |              |
| 2607:      | 70         | 10        | 60 | 1 | 69 | 10 | 59 | 0 | 1341.9933700 | 1341.9933534 |
| 0.0000166  | -0.0004000 | 0.0000000 |    |   |    |    |    |   |              |              |
| 2608:      | 71         | 10        | 61 | 1 | 70 | 10 | 60 | 0 | 1342.2372700 | 1342.2368037 |
| 0.0004663  | -0.0004000 | 0.0000000 |    |   |    |    |    |   |              |              |
| 2609:      | 72         | 10        | 62 | 1 | 71 | 10 | 61 | 0 | 1342.4803400 | 1342.4800578 |
| 0.0002822  | -0.0004000 | 0.0000000 |    |   |    |    |    |   |              |              |
| 2610:      | 75         | 10        | 65 | 1 | 74 | 10 | 64 | 0 | 1343.2086800 | 1343.2086345 |
| 0.0000455  | -0.0004000 | 0.0000000 |    |   |    |    |    |   |              |              |
| 2611:      | 76         | 10        | 66 | 1 | 75 | 10 | 65 | 0 | 1343.4510400 | 1343.4510955 |
| -0.0000555 | -0.0004000 | 0.0000000 |    |   |    |    |    |   |              |              |
| 2612:      | 77         | 10        | 67 | 1 | 76 | 10 | 66 | 0 | 1343.6940100 | 1343.6933562 |
| 0.0006538  | -0.0004000 | 0.0000000 |    |   |    |    |    |   |              |              |
| 2613:      | 78         | 10        | 69 | 1 | 79 | 10 | 70 | 0 | 1304.0808800 | 1304.0812806 |
| -0.0004006 | -0.0004000 | 0.0000000 |    |   |    |    |    |   |              |              |
| 2614:      | 77         | 10        | 68 | 1 | 78 | 10 | 69 | 0 | 1304.3418600 | 1304.3420154 |
| -0.0001554 | -0.0004000 | 0.0000000 |    |   |    |    |    |   |              |              |
| 2615:      | 76         | 10        | 67 | 1 | 77 | 10 | 68 | 0 | 1304.6025700 | 1304.6027438 |
| -0.0001738 | -0.0004000 | 0.0000000 |    |   |    |    |    |   |              |              |
| 2616:      | 75         | 10        | 66 | 1 | 76 | 10 | 67 | 0 | 1304.8636300 | 1304.8634637 |
| 0.0001663  | -0.0004000 | 0.0000000 |    |   |    |    |    |   |              |              |
| 2617:      | 73         | 10        | 64 | 1 | 74 | 10 | 65 | 0 | 1305.3852800 | 1305.3848702 |
| 0.0004098  | -0.0004000 | 0.0000000 |    |   |    |    |    |   |              |              |
| 2618:      | 72         | 10        | 63 | 1 | 73 | 10 | 64 | 0 | 1305.6456500 | 1305.6455530 |
| 0.0000970  | -0.0004000 | 0.0000000 |    |   |    |    |    |   |              |              |
| 2619:      | 71         | 10        | 62 | 1 | 72 | 10 | 63 | 0 | 1305.9057600 | 1305.9062195 |
| -0.0004595 | -0.0004000 | 0.0000000 |    |   |    |    |    |   |              |              |
| 2620:      | 70         | 10        | 61 | 1 | 71 | 10 | 62 | 0 | 1306.1664300 | 1306.1668678 |
| -0.0004378 | -0.0004000 | 0.0000000 |    |   |    |    |    |   |              |              |
| 2621:      | 69         | 10        | 60 | 1 | 70 | 10 | 61 | 0 | 1306.4269500 | 1306.4274960 |
| -0.0005460 | -0.0004000 | 0.0000000 |    |   |    |    |    |   |              |              |
| 2622:      | 68         | 10        | 59 | 1 | 69 | 10 | 60 | 0 | 1306.6877300 | 1306.6881022 |
| -0.0003722 | -0.0004000 | 0.0000000 |    |   |    |    |    |   |              |              |
| 2623:      | 67         | 10        | 58 | 1 | 68 | 10 | 59 | 0 | 1306.9484700 | 1306.9486844 |
| -0.0002144 | -0.0004000 | 0.0000000 |    |   |    |    |    |   |              |              |
| 2624:      | 66         | 10        | 57 | 1 | 67 | 10 | 58 | 0 | 1307.2095100 | 1307.2092409 |
| 0.0002691  | -0.0004000 | 0.0000000 |    |   |    |    |    |   |              |              |
| 2625:      | 65         | 10        | 56 | 1 | 66 | 10 | 57 | 0 | 1307.4694400 | 1307.4697697 |
| -0.0003297 | -0.0004000 | 0.0000000 |    |   |    |    |    |   |              |              |
| 2626:      | 61         | 10        | 52 | 1 | 62 | 10 | 53 | 0 | 1308.5114400 | 1308.5115705 |
| -0.0001305 | -0.0004000 | 0.0000000 |    |   |    |    |    |   |              |              |
| 2627:      | 60         | 10        | 51 | 1 | 61 | 10 | 52 | 0 | 1308.7720100 | 1308.7719329 |
| 0.0000771  | -0.0004000 | 0.0000000 |    |   |    |    |    |   |              |              |
| 2628:      | 53         | 10        | 44 | 1 | 54 | 10 | 45 | 0 | 1310.5935600 | 1310.5932811 |
| 0.0002789  | -0.0004000 | 0.0000000 |    |   |    |    |    |   |              |              |
| 2629:      | 52         | 10        | 43 | 1 | 53 | 10 | 44 | 0 | 1310.8529000 | 1310.8532824 |
| -0.0003824 | -0.0004000 | 0.0000000 |    |   |    |    |    |   |              |              |
| 2630:      | 51         | 10        | 42 | 1 | 52 | 10 | 43 | 0 | 1311.1130200 | 1311.1132306 |

|            |            |           |       |                             |
|------------|------------|-----------|-------|-----------------------------|
| -0.0002106 | -0.0004000 | 0.0000000 |       |                             |
| 2631: 49   | 10 40      | 1 50      | 10 41 | 0 1311.6327200 1311.6329607 |
| -0.0002407 | -0.0004000 | 0.0000000 |       |                             |
| 2632: 48   | 10 39      | 1 49      | 10 40 | 0 1311.8924600 1311.8927390 |
| -0.0002790 | -0.0004000 | 0.0000000 |       |                             |
| 2633: 47   | 10 38      | 1 48      | 10 39 | 0 1312.1525000 1312.1524574 |
| 0.0000426  | -0.0004000 | 0.0000000 |       |                             |
| 2634: 46   | 10 37      | 1 47      | 10 38 | 0 1312.4118200 1312.4121139 |
| -0.0002939 | -0.0004000 | 0.0000000 |       |                             |
| 2635: 43   | 10 34      | 1 44      | 10 35 | 0 1313.1910200 1313.1906964 |
| 0.0003236  | -0.0004000 | 0.0000000 |       |                             |
| 2636: 41   | 10 32      | 1 42      | 10 33 | 0 1313.7097500 1313.7094119 |
| 0.0003381  | -0.0004000 | 0.0000000 |       |                             |
| 2637: 40   | 10 31      | 1 41      | 10 32 | 0 1313.9686000 1313.9686628 |
| -0.0000628 | -0.0004000 | 0.0000000 |       |                             |
| 2638: 39   | 10 30      | 1 40      | 10 31 | 0 1314.2281500 1314.2278405 |
| 0.0003095  | -0.0004000 | 0.0000000 |       |                             |
| 2639: 38   | 10 29      | 1 39      | 10 30 | 0 1314.4868400 1314.4869432 |
| -0.0001032 | -0.0004000 | 0.0000000 |       |                             |
| 2640: 37   | 10 28      | 1 38      | 10 29 | 0 1314.7459700 1314.7459693 |
| 0.0000007  | -0.0004000 | 0.0000000 |       |                             |
| 2641: 36   | 10 27      | 1 37      | 10 28 | 0 1315.0053300 1315.0049172 |
| 0.0004128  | -0.0004000 | 0.0000000 |       |                             |
| 2642: 31   | 10 22      | 1 32      | 10 23 | 0 1316.2985900 1316.2984303 |
| 0.0001597  | -0.0004000 | 0.0000000 |       |                             |
| 2643: 30   | 10 21      | 1 31      | 10 22 | 0 1316.5569600 1316.5568768 |
| 0.0000832  | -0.0004000 | 0.0000000 |       |                             |
| 2644: 29   | 10 20      | 1 30      | 10 21 | 0 1316.8148900 1316.8152344 |
| -0.0003444 | -0.0004000 | 0.0000000 |       |                             |
| 2645: 28   | 10 19      | 1 29      | 10 20 | 0 1317.0735300 1317.0735016 |
| 0.0000284  | -0.0004000 | 0.0000000 |       |                             |
| 2646: 27   | 10 18      | 1 28      | 10 19 | 0 1317.3321400 1317.3316770 |
| 0.0004630  | -0.0004000 | 0.0000000 |       |                             |
| 2647: 26   | 10 17      | 1 27      | 10 18 | 0 1317.5900700 1317.5897590 |
| 0.0003110  | -0.0004000 | 0.0000000 |       |                             |
| 2648: 25   | 10 16      | 1 26      | 10 17 | 0 1317.8474600 1317.8477462 |
| -0.0002862 | -0.0004000 | 0.0000000 |       |                             |
| 2649: 24   | 10 15      | 1 25      | 10 16 | 0 1318.1054200 1318.1056373 |
| -0.0002173 | -0.0004000 | 0.0000000 |       |                             |
| 2650: 23   | 10 14      | 1 24      | 10 15 | 0 1318.3631400 1318.3634307 |
| -0.0002907 | -0.0004000 | 0.0000000 |       |                             |
| 2651: 22   | 10 13      | 1 23      | 10 14 | 0 1318.6211800 1318.6211251 |
| 0.0000549  | -0.0004000 | 0.0000000 |       |                             |
| 2652: 21   | 10 12      | 1 22      | 10 13 | 0 1318.8785800 1318.8787190 |
| -0.0001390 | -0.0004000 | 0.0000000 |       |                             |
| 2653: 17   | 10 8       | 1 18      | 10 9  | 0 1319.9084700 1319.9080628 |
| 0.0004072  | -0.0004000 | 0.0000000 |       |                             |
| 2654: 16   | 10 7       | 1 17      | 10 8  | 0 1320.1653200 1320.1651341 |
| 0.0001859  | -0.0004000 | 0.0000000 |       |                             |
| 2655: 15   | 10 6       | 1 16      | 10 7  | 0 1320.4223300 1320.4220968 |
| 0.0002332  | -0.0004000 | 0.0000000 |       |                             |
| 2656: 13   | 10 4       | 1 14      | 10 5  | 0 1320.9358600 1320.9356912 |
| 0.0001688  | -0.0004000 | 0.0000000 |       |                             |
| 2657: 12   | 10 3       | 1 13      | 10 4  | 0 1321.1924100 1321.1923205 |
| 0.0000895  | -0.0004000 | 0.0000000 |       |                             |
| 2658: 11   | 10 2       | 1 12      | 10 3  | 0 1321.4489700 1321.4488360 |
| 0.0001340  | -0.0004000 | 0.0000000 |       |                             |
| 2659: 13   | 10 4       | 1 12      | 10 3  | 0 1327.8214200 1327.8212835 |
| 0.0001365  | -0.0004000 | 0.0000000 |       |                             |
| 2660: 14   | 10 5       | 1 13      | 10 4  | 0 1328.0743700 1328.0744330 |
| -0.0000630 | -0.0004000 | 0.0000000 |       |                             |
| 2661: 16   | 10 7       | 1 15      | 10 6  | 0 1328.5806600 1328.5802991 |
| 0.0003609  | -0.0004000 | 0.0000000 |       |                             |
| 2662: 17   | 10 8       | 1 16      | 10 7  | 0 1328.8332600 1328.8330137 |
| 0.0002463  | -0.0004000 | 0.0000000 |       |                             |

|       |            |            |           |   |    |    |    |   |              |              |
|-------|------------|------------|-----------|---|----|----|----|---|--------------|--------------|
| 2663: | 18         | 10         | 9         | 1 | 17 | 10 | 8  | 0 | 1329.0856900 | 1329.0855813 |
|       | 0.0001087  | -0.0004000 | 0.0000000 |   |    |    |    |   |              |              |
| 2664: | 19         | 10         | 10        | 1 | 18 | 10 | 9  | 0 | 1329.3379800 | 1329.3380010 |
|       | -0.0000210 | -0.0004000 | 0.0000000 |   |    |    |    |   |              |              |
| 2665: | 20         | 10         | 11        | 1 | 19 | 10 | 10 | 0 | 1329.5901800 | 1329.5902718 |
|       | -0.0000918 | -0.0004000 | 0.0000000 |   |    |    |    |   |              |              |
| 2666: | 22         | 10         | 13        | 1 | 21 | 10 | 12 | 0 | 1330.0945500 | 1330.0943628 |
|       | 0.0001872  | -0.0004000 | 0.0000000 |   |    |    |    |   |              |              |
| 2667: | 23         | 10         | 14        | 1 | 22 | 10 | 13 | 0 | 1330.3463900 | 1330.3461811 |
|       | 0.0002089  | -0.0004000 | 0.0000000 |   |    |    |    |   |              |              |
| 2668: | 24         | 10         | 15        | 1 | 23 | 10 | 14 | 0 | 1330.5975700 | 1330.5978466 |
|       | -0.0002766 | -0.0004000 | 0.0000000 |   |    |    |    |   |              |              |
| 2669: | 25         | 10         | 16        | 1 | 24 | 10 | 15 | 0 | 1330.8494300 | 1330.8493584 |
|       | 0.0000716  | -0.0004000 | 0.0000000 |   |    |    |    |   |              |              |
| 2670: | 26         | 10         | 17        | 1 | 25 | 10 | 16 | 0 | 1331.1008900 | 1331.1007156 |
|       | 0.0001744  | -0.0004000 | 0.0000000 |   |    |    |    |   |              |              |
| 2671: | 27         | 10         | 18        | 1 | 26 | 10 | 17 | 0 | 1331.3519200 | 1331.3519172 |
|       | 0.0000028  | -0.0004000 | 0.0000000 |   |    |    |    |   |              |              |
| 2672: | 28         | 10         | 19        | 1 | 27 | 10 | 18 | 0 | 1331.6030100 | 1331.6029622 |
|       | 0.0000478  | -0.0004000 | 0.0000000 |   |    |    |    |   |              |              |
| 2673: | 29         | 10         | 20        | 1 | 28 | 10 | 19 | 0 | 1331.8540100 | 1331.8538498 |
|       | 0.0001602  | -0.0004000 | 0.0000000 |   |    |    |    |   |              |              |
| 2674: | 30         | 10         | 21        | 1 | 29 | 10 | 20 | 0 | 1332.1045800 | 1332.1045790 |
|       | 0.0000010  | -0.0004000 | 0.0000000 |   |    |    |    |   |              |              |
| 2675: | 31         | 10         | 22        | 1 | 30 | 10 | 21 | 0 | 1332.3552300 | 1332.3551488 |
|       | 0.0000812  | -0.0004000 | 0.0000000 |   |    |    |    |   |              |              |
| 2676: | 34         | 10         | 25        | 1 | 33 | 10 | 24 | 0 | 1333.1061600 | 1333.1058931 |
|       | 0.0002669  | -0.0004000 | 0.0000000 |   |    |    |    |   |              |              |
| 2677: | 35         | 10         | 26        | 1 | 34 | 10 | 25 | 0 | 1333.3554500 | 1333.3558164 |
|       | -0.0003664 | -0.0004000 | 0.0000000 |   |    |    |    |   |              |              |
| 2678: | 36         | 10         | 27        | 1 | 35 | 10 | 26 | 0 | 1333.6054900 | 1333.6055758 |
|       | -0.0000858 | -0.0004000 | 0.0000000 |   |    |    |    |   |              |              |
| 2679: | 37         | 10         | 28        | 1 | 36 | 10 | 27 | 0 | 1333.8557400 | 1333.8551702 |
|       | 0.0005698  | -0.0004000 | 0.0000000 |   |    |    |    |   |              |              |
| 2680: | 38         | 10         | 29        | 1 | 37 | 10 | 28 | 0 | 1334.1048400 | 1334.1045989 |
|       | 0.0002411  | -0.0004000 | 0.0000000 |   |    |    |    |   |              |              |
| 2681: | 39         | 10         | 30        | 1 | 38 | 10 | 29 | 0 | 1334.3544500 | 1334.3538609 |
|       | 0.0005891  | -0.0004000 | 0.0000000 |   |    |    |    |   |              |              |
| 2682: | 40         | 10         | 31        | 1 | 39 | 10 | 30 | 0 | 1334.6031400 | 1334.6029553 |
|       | 0.0001847  | -0.0004000 | 0.0000000 |   |    |    |    |   |              |              |
| 2683: | 42         | 10         | 33        | 1 | 41 | 10 | 32 | 0 | 1335.1005900 | 1335.1006377 |
|       | -0.0000477 | -0.0004000 | 0.0000000 |   |    |    |    |   |              |              |
| 2684: | 43         | 10         | 34        | 1 | 42 | 10 | 33 | 0 | 1335.3491200 | 1335.3492238 |
|       | -0.0001038 | -0.0004000 | 0.0000000 |   |    |    |    |   |              |              |
| 2685: | 44         | 10         | 35        | 1 | 43 | 10 | 34 | 0 | 1335.5978800 | 1335.5976387 |
|       | 0.0002413  | -0.0004000 | 0.0000000 |   |    |    |    |   |              |              |
| 2686: | 45         | 10         | 36        | 1 | 44 | 10 | 35 | 0 | 1335.8457800 | 1335.8458814 |
|       | -0.0001014 | -0.0004000 | 0.0000000 |   |    |    |    |   |              |              |
| 2687: | 46         | 10         | 37        | 1 | 45 | 10 | 36 | 0 | 1336.0937700 | 1336.0939510 |
|       | -0.0001810 | -0.0004000 | 0.0000000 |   |    |    |    |   |              |              |
| 2688: | 47         | 10         | 38        | 1 | 46 | 10 | 37 | 0 | 1336.3416800 | 1336.3418467 |
|       | -0.0001667 | -0.0004000 | 0.0000000 |   |    |    |    |   |              |              |
| 2689: | 48         | 10         | 39        | 1 | 47 | 10 | 38 | 0 | 1336.5894500 | 1336.5895675 |
|       | -0.0001175 | -0.0004000 | 0.0000000 |   |    |    |    |   |              |              |
| 2690: | 49         | 10         | 40        | 1 | 48 | 10 | 39 | 0 | 1336.8371300 | 1336.8371125 |
|       | 0.0000175  | -0.0004000 | 0.0000000 |   |    |    |    |   |              |              |
| 2691: | 50         | 10         | 41        | 1 | 49 | 10 | 40 | 0 | 1337.0844100 | 1337.0844808 |
|       | -0.0000708 | -0.0004000 | 0.0000000 |   |    |    |    |   |              |              |
| 2692: | 51         | 10         | 42        | 1 | 50 | 10 | 41 | 0 | 1337.3318000 | 1337.3316715 |
|       | 0.0001285  | -0.0004000 | 0.0000000 |   |    |    |    |   |              |              |
| 2693: | 52         | 10         | 43        | 1 | 51 | 10 | 42 | 0 | 1337.5785200 | 1337.5786838 |
|       | -0.0001638 | -0.0004000 | 0.0000000 |   |    |    |    |   |              |              |
| 2694: | 53         | 10         | 44        | 1 | 52 | 10 | 43 | 0 | 1337.8254400 | 1337.8255166 |
|       | -0.0000766 | -0.0004000 | 0.0000000 |   |    |    |    |   |              |              |
| 2695: | 54         | 10         | 45        | 1 | 53 | 10 | 44 | 0 | 1338.0720600 | 1338.0721690 |

|            |            |           |              |              |
|------------|------------|-----------|--------------|--------------|
| -0.0001090 | -0.0004000 | 0.0000000 |              |              |
| 2696:      | 55         | 10        | 46           | 1 54 10 45 0 |
| -0.0001903 | -0.0004000 | 0.0000000 | 1338.3184500 | 1338.3186403 |
| 2697:      | 57         | 10        | 48           | 1 56 10 47 0 |
| 0.0002944  | -0.0004000 | 0.0000000 | 1338.8113300 | 1338.8110356 |
| 2698:      | 59         | 10        | 50           | 1 58 10 49 0 |
| -0.0002652 | -0.0004000 | 0.0000000 | 1339.3024300 | 1339.3026952 |
| 2699:      | 60         | 10        | 51           | 1 59 10 50 0 |
| -0.0001968 | -0.0004000 | 0.0000000 | 1339.5480500 | 1339.5482468 |
| 2700:      | 62         | 10        | 53           | 1 61 10 52 0 |
| 0.0000706  | -0.0004000 | 0.0000000 | 1340.0388600 | 1340.0387894 |
| 2701:      | 63         | 10        | 54           | 1 62 10 53 0 |
| -0.0000485 | -0.0004000 | 0.0000000 | 1340.2837300 | 1340.2837785 |
| 2702:      | 66         | 10        | 57           | 1 65 10 56 0 |
| 0.0000035  | -0.0004000 | 0.0000000 | 1341.0176100 | 1341.0176065 |
| 2703:      | 67         | 10        | 58           | 1 66 10 57 0 |
| -0.0000131 | -0.0004000 | 0.0000000 | 1341.2618200 | 1341.2618331 |
| 2704:      | 68         | 10        | 59           | 1 67 10 58 0 |
| -0.0000469 | -0.0004000 | 0.0000000 | 1341.5058200 | 1341.5058669 |
| 2705:      | 69         | 10        | 60           | 1 68 10 59 0 |
| 0.0000231  | -0.0004000 | 0.0000000 | 1341.7497300 | 1341.7497069 |
| 2706:      | 70         | 10        | 61           | 1 69 10 60 0 |
| 0.0000176  | -0.0004000 | 0.0000000 | 1341.9933700 | 1341.9933524 |
| 2707:      | 71         | 10        | 62           | 1 70 10 61 0 |
| 0.0004675  | -0.0004000 | 0.0000000 | 1342.2372700 | 1342.2368025 |
| 2708:      | 72         | 10        | 63           | 1 71 10 62 0 |
| 0.0002838  | -0.0004000 | 0.0000000 | 1342.4803400 | 1342.4800562 |
| 2709:      | 75         | 10        | 66           | 1 74 10 65 0 |
| 0.0000489  | -0.0004000 | 0.0000000 | 1343.2086800 | 1343.2086311 |
| 2710:      | 76         | 10        | 67           | 1 75 10 66 0 |
| -0.0000511 | -0.0004000 | 0.0000000 | 1343.4510400 | 1343.4510911 |
| 2711:      | 77         | 10        | 68           | 1 76 10 67 0 |
| 0.0006594  | -0.0004000 | 0.0000000 | 1343.6940100 | 1343.6933506 |
| 2712:      | 73         | 11        | 62           | 1 74 11 63 0 |
| -0.0003314 | -0.0004000 | 0.0000000 | 1305.1675500 | 1305.1678814 |
| 2713:      | 72         | 11        | 61           | 1 73 11 62 0 |
| 0.0001849  | -0.0004000 | 0.0000000 | 1305.4285900 | 1305.4284051 |
| 2714:      | 71         | 11        | 60           | 1 72 11 61 0 |
| -0.0003451 | -0.0004000 | 0.0000000 | 1305.6885700 | 1305.6889151 |
| 2715:      | 70         | 11        | 59           | 1 71 11 60 0 |
| -0.0004995 | -0.0004000 | 0.0000000 | 1305.9489100 | 1305.9494095 |
| 2716:      | 69         | 11        | 58           | 1 70 11 59 0 |
| -0.0004464 | -0.0004000 | 0.0000000 | 1306.2094400 | 1306.2098864 |
| 2717:      | 68         | 11        | 57           | 1 69 11 58 0 |
| 0.0000160  | -0.0004000 | 0.0000000 | 1306.4703600 | 1306.4703440 |
| 2718:      | 66         | 11        | 55           | 1 67 11 56 0 |
| -0.0005141 | -0.0004000 | 0.0000000 | 1306.9906800 | 1306.9911941 |
| 2719:      | 65         | 11        | 54           | 1 66 11 55 0 |
| -0.0004129 | -0.0004000 | 0.0000000 | 1307.2511700 | 1307.2515829 |
| 2720:      | 63         | 11        | 52           | 1 64 11 53 0 |
| -0.0000890 | -0.0004000 | 0.0000000 | 1307.7721900 | 1307.7722790 |
| 2721:      | 62         | 11        | 51           | 1 63 11 52 0 |
| 0.0000973  | -0.0004000 | 0.0000000 | 1308.0326800 | 1308.0325827 |
| 2722:      | 61         | 11        | 50           | 1 62 11 51 0 |
| 0.0000457  | -0.0004000 | 0.0000000 | 1308.2929000 | 1308.2928543 |
| 2723:      | 60         | 11        | 49           | 1 61 11 50 0 |
| -0.0002123 | -0.0004000 | 0.0000000 | 1308.5528800 | 1308.5530923 |
| 2724:      | 59         | 11        | 48           | 1 60 11 49 0 |
| 0.0000054  | -0.0004000 | 0.0000000 | 1308.8133000 | 1308.8132946 |
| 2725:      | 58         | 11        | 47           | 1 59 11 48 0 |
| -0.0002197 | -0.0004000 | 0.0000000 | 1309.0732400 | 1309.0734597 |
| 2726:      | 56         | 11        | 45           | 1 57 11 46 0 |
| -0.0003707 | -0.0004000 | 0.0000000 | 1309.5933000 | 1309.5936707 |
| 2727:      | 54         | 11        | 43           | 1 55 11 44 0 |
| 0.0000787  | -0.0004000 | 0.0000000 | 1310.1137900 | 1310.1137113 |

|            |            |           |    |   |    |    |    |   |              |              |
|------------|------------|-----------|----|---|----|----|----|---|--------------|--------------|
| 2728:      | 53         | 11        | 42 | 1 | 54 | 11 | 43 | 0 | 1310.3739100 | 1310.3736632 |
| 0.0002468  | -0.0004000 | 0.0000000 |    |   |    |    |    |   |              |              |
| 2729:      | 52         | 11        | 41 | 1 | 53 | 11 | 42 | 0 | 1310.6335900 | 1310.6335674 |
| 0.0000226  | -0.0004000 | 0.0000000 |    |   |    |    |    |   |              |              |
| 2730:      | 51         | 11        | 40 | 1 | 52 | 11 | 41 | 0 | 1310.8935300 | 1310.8934219 |
| 0.0001081  | -0.0004000 | 0.0000000 |    |   |    |    |    |   |              |              |
| 2731:      | 50         | 11        | 39 | 1 | 51 | 11 | 40 | 0 | 1311.1531400 | 1311.1532252 |
| -0.0000852 | -0.0004000 | 0.0000000 |    |   |    |    |    |   |              |              |
| 2732:      | 49         | 11        | 38 | 1 | 50 | 11 | 39 | 0 | 1311.4129400 | 1311.4129754 |
| -0.0000354 | -0.0004000 | 0.0000000 |    |   |    |    |    |   |              |              |
| 2733:      | 48         | 11        | 37 | 1 | 49 | 11 | 38 | 0 | 1311.6730100 | 1311.6726710 |
| 0.0003390  | -0.0004000 | 0.0000000 |    |   |    |    |    |   |              |              |
| 2734:      | 47         | 11        | 36 | 1 | 48 | 11 | 37 | 0 | 1311.9326500 | 1311.9323101 |
| 0.0003399  | -0.0004000 | 0.0000000 |    |   |    |    |    |   |              |              |
| 2735:      | 46         | 11        | 35 | 1 | 47 | 11 | 36 | 0 | 1312.1921300 | 1312.1918912 |
| 0.0002388  | -0.0004000 | 0.0000000 |    |   |    |    |    |   |              |              |
| 2736:      | 45         | 11        | 34 | 1 | 46 | 11 | 35 | 0 | 1312.4514600 | 1312.4514124 |
| 0.0000476  | -0.0004000 | 0.0000000 |    |   |    |    |    |   |              |              |
| 2737:      | 44         | 11        | 33 | 1 | 45 | 11 | 34 | 0 | 1312.7114100 | 1312.7108722 |
| 0.0005378  | -0.0004000 | 0.0000000 |    |   |    |    |    |   |              |              |
| 2738:      | 43         | 11        | 32 | 1 | 44 | 11 | 33 | 0 | 1312.9705200 | 1312.9702689 |
| 0.0002511  | -0.0004000 | 0.0000000 |    |   |    |    |    |   |              |              |
| 2739:      | 42         | 11        | 31 | 1 | 43 | 11 | 32 | 0 | 1313.2298100 | 1313.2296008 |
| 0.0002092  | -0.0004000 | 0.0000000 |    |   |    |    |    |   |              |              |
| 2740:      | 41         | 11        | 30 | 1 | 42 | 11 | 31 | 0 | 1313.4888600 | 1313.4888663 |
| -0.0000063 | -0.0004000 | 0.0000000 |    |   |    |    |    |   |              |              |
| 2741:      | 40         | 11        | 29 | 1 | 41 | 11 | 30 | 0 | 1313.7483500 | 1313.7480637 |
| 0.0002863  | -0.0004000 | 0.0000000 |    |   |    |    |    |   |              |              |
| 2742:      | 38         | 11        | 27 | 1 | 39 | 11 | 28 | 0 | 1314.2661100 | 1314.2662478 |
| -0.0001378 | -0.0004000 | 0.0000000 |    |   |    |    |    |   |              |              |
| 2743:      | 37         | 11        | 26 | 1 | 38 | 11 | 27 | 0 | 1314.5252000 | 1314.5252313 |
| -0.0000313 | -0.0004000 | 0.0000000 |    |   |    |    |    |   |              |              |
| 2744:      | 34         | 11        | 23 | 1 | 35 | 11 | 24 | 0 | 1315.3020900 | 1315.3017282 |
| 0.0003618  | -0.0004000 | 0.0000000 |    |   |    |    |    |   |              |              |
| 2745:      | 33         | 11        | 22 | 1 | 34 | 11 | 23 | 0 | 1315.5603500 | 1315.5604040 |
| -0.0000540 | -0.0004000 | 0.0000000 |    |   |    |    |    |   |              |              |
| 2746:      | 32         | 11        | 21 | 1 | 33 | 11 | 22 | 0 | 1315.8192200 | 1315.8189990 |
| 0.0002210  | -0.0004000 | 0.0000000 |    |   |    |    |    |   |              |              |
| 2747:      | 31         | 11        | 20 | 1 | 32 | 11 | 21 | 0 | 1316.0777200 | 1316.0775115 |
| 0.0002085  | -0.0004000 | 0.0000000 |    |   |    |    |    |   |              |              |
| 2748:      | 30         | 11        | 19 | 1 | 31 | 11 | 20 | 0 | 1316.3360500 | 1316.3359401 |
| 0.0001099  | -0.0004000 | 0.0000000 |    |   |    |    |    |   |              |              |
| 2749:      | 29         | 11        | 18 | 1 | 30 | 11 | 19 | 0 | 1316.5941200 | 1316.5942832 |
| -0.0001632 | -0.0004000 | 0.0000000 |    |   |    |    |    |   |              |              |
| 2750:      | 26         | 11        | 15 | 1 | 27 | 11 | 16 | 0 | 1317.3688300 | 1317.3687841 |
| 0.0000459  | -0.0004000 | 0.0000000 |    |   |    |    |    |   |              |              |
| 2751:      | 24         | 11        | 13 | 1 | 25 | 11 | 14 | 0 | 1317.8849100 | 1317.8846626 |
| 0.0002474  | -0.0004000 | 0.0000000 |    |   |    |    |    |   |              |              |
| 2752:      | 23         | 11        | 12 | 1 | 24 | 11 | 13 | 0 | 1318.1424700 | 1318.1424608 |
| 0.0000092  | -0.0004000 | 0.0000000 |    |   |    |    |    |   |              |              |
| 2753:      | 20         | 11        | 9  | 1 | 21 | 11 | 10 | 0 | 1318.9154300 | 1318.9152733 |
| 0.0001567  | -0.0004000 | 0.0000000 |    |   |    |    |    |   |              |              |
| 2754:      | 19         | 11        | 8  | 1 | 20 | 11 | 9  | 0 | 1319.1722200 | 1319.1726786 |
| -0.0004586 | -0.0004000 | 0.0000000 |    |   |    |    |    |   |              |              |
| 2755:      | 18         | 11        | 7  | 1 | 19 | 11 | 8  | 0 | 1319.4297900 | 1319.4299820 |
| -0.0001920 | -0.0004000 | 0.0000000 |    |   |    |    |    |   |              |              |
| 2756:      | 17         | 11        | 6  | 1 | 18 | 11 | 7  | 0 | 1319.6870400 | 1319.6871822 |
| -0.0001422 | -0.0004000 | 0.0000000 |    |   |    |    |    |   |              |              |
| 2757:      | 16         | 11        | 5  | 1 | 17 | 11 | 6  | 0 | 1319.9442900 | 1319.9442776 |
| 0.0000124  | -0.0004000 | 0.0000000 |    |   |    |    |    |   |              |              |
| 2758:      | 15         | 11        | 4  | 1 | 16 | 11 | 5  | 0 | 1320.2011600 | 1320.2012670 |
| -0.0001070 | -0.0004000 | 0.0000000 |    |   |    |    |    |   |              |              |
| 2759:      | 14         | 11        | 3  | 1 | 15 | 11 | 4  | 0 | 1320.4584200 | 1320.4581489 |
| 0.0002711  | -0.0004000 | 0.0000000 |    |   |    |    |    |   |              |              |
| 2760:      | 16         | 11        | 5  | 1 | 15 | 11 | 4  | 0 | 1328.3614300 | 1328.3608971 |

|            |            |           |              |              |
|------------|------------|-----------|--------------|--------------|
| 0.0005329  | -0.0004000 | 0.0000000 |              |              |
| 2761:      | 17         | 11        | 6            | 1 16 11 5 0  |
| 0.0005035  | -0.0004000 | 0.0000000 | 1328.6141500 | 1328.6136465 |
| 2762:      | 31         | 11        | 20           | 1 30 11 19 0 |
| 0.0001124  | -0.0004000 | 0.0000000 | 1332.1360200 | 1332.1359076 |
| 2763:      | 32         | 11        | 21           | 1 31 11 20 0 |
| 0.0003682  | -0.0004000 | 0.0000000 | 1332.3866600 | 1332.3862918 |
| 2764:      | 33         | 11        | 22           | 1 32 11 21 0 |
| 0.0001208  | -0.0004000 | 0.0000000 | 1332.6366300 | 1332.6365092 |
| 2765:      | 35         | 11        | 24           | 1 34 11 23 0 |
| 0.0000216  | -0.0004000 | 0.0000000 | 1333.1364600 | 1333.1364384 |
| 2766:      | 36         | 11        | 25           | 1 35 11 24 0 |
| -0.0001980 | -0.0004000 | 0.0000000 | 1333.3859500 | 1333.3861480 |
| 2767:      | 40         | 11        | 29           | 1 39 11 28 0 |
| -0.0002593 | -0.0004000 | 0.0000000 | 1334.3830000 | 1334.3832593 |
| 2768:      | 41         | 11        | 30           | 1 40 11 29 0 |
| -0.0002396 | -0.0004000 | 0.0000000 | 1334.6318600 | 1334.6320996 |
| 2769:      | 42         | 11        | 31           | 1 41 11 30 0 |
| 0.0000774  | -0.0004000 | 0.0000000 | 1334.8808400 | 1334.8807626 |
| 2770:      | 43         | 11        | 32           | 1 42 11 31 0 |
| -0.0003970 | -0.0004000 | 0.0000000 | 1335.1288500 | 1335.1292470 |
| 2771:      | 44         | 11        | 33           | 1 43 11 32 0 |
| -0.0000518 | -0.0004000 | 0.0000000 | 1335.3775000 | 1335.3775518 |
| 2772:      | 45         | 11        | 34           | 1 44 11 33 0 |
| 0.0002042  | -0.0004000 | 0.0000000 | 1335.6258800 | 1335.6256758 |
| 2773:      | 46         | 11        | 35           | 1 45 11 34 0 |
| -0.0000477 | -0.0004000 | 0.0000000 | 1335.8735700 | 1335.8736177 |
| 2774:      | 47         | 11        | 36           | 1 46 11 35 0 |
| 0.0000235  | -0.0004000 | 0.0000000 | 1336.1214000 | 1336.1213765 |
| 2775:      | 48         | 11        | 37           | 1 47 11 36 0 |
| 0.0000090  | -0.0004000 | 0.0000000 | 1336.3689600 | 1336.3689510 |
| 2776:      | 49         | 11        | 38           | 1 48 11 37 0 |
| -0.0001099 | -0.0004000 | 0.0000000 | 1336.6162300 | 1336.6163399 |
| 2777:      | 52         | 11        | 41           | 1 51 11 40 0 |
| -0.0000919 | -0.0004000 | 0.0000000 | 1337.3572900 | 1337.3573819 |
| 2778:      | 53         | 11        | 42           | 1 52 11 41 0 |
| 0.0000330  | -0.0004000 | 0.0000000 | 1337.6040500 | 1337.6040170 |
| 2779:      | 56         | 11        | 45           | 1 55 11 44 0 |
| 0.0002711  | -0.0004000 | 0.0000000 | 1338.3430400 | 1338.3427689 |
| 2780:      | 60         | 11        | 49           | 1 59 11 48 0 |
| 0.0004046  | -0.0004000 | 0.0000000 | 1339.3254400 | 1339.3250354 |
| 2781:      | 61         | 11        | 50           | 1 60 11 49 0 |
| 0.0004446  | -0.0004000 | 0.0000000 | 1339.5705500 | 1339.5701054 |
| 2782:      | 74         | 11        | 63           | 1 73 11 62 0 |
| -0.0001187 | -0.0004000 | 0.0000000 | 1342.7371500 | 1342.7372687 |
| 2783:      | 76         | 11        | 65           | 1 75 11 64 0 |
| -0.0003650 | -0.0004000 | 0.0000000 | 1343.2209700 | 1343.2213350 |
| 2784:      | 78         | 11        | 67           | 1 77 11 66 0 |
| -0.0007023 | -0.0004000 | 0.0000000 | 1343.7038200 | 1343.7045223 |
| 2785:      | 79         | 11        | 68           | 1 78 11 67 0 |
| 0.0001169  | -0.0004000 | 0.0000000 | 1343.9459000 | 1343.9457831 |
| 2786:      | 80         | 11        | 69           | 1 79 11 68 0 |
| 0.0001396  | -0.0004000 | 0.0000000 | 1344.1869600 | 1344.1868204 |
| 2787:      | 81         | 11        | 70           | 1 80 11 69 0 |
| -0.0002329 | -0.0004000 | 0.0000000 | 1344.4274000 | 1344.4276329 |
| 2788:      | 82         | 11        | 71           | 1 81 11 70 0 |
| 0.0002007  | -0.0004000 | 0.0000000 | 1344.6684200 | 1344.6682193 |
| 2789:      | 73         | 11        | 63           | 1 74 11 64 0 |
| -0.0003315 | -0.0004000 | 0.0000000 | 1305.1675500 | 1305.1678815 |
| 2790:      | 72         | 11        | 62           | 1 73 11 63 0 |
| 0.0001848  | -0.0004000 | 0.0000000 | 1305.4285900 | 1305.4284052 |
| 2791:      | 71         | 11        | 61           | 1 72 11 62 0 |
| -0.0003451 | -0.0004000 | 0.0000000 | 1305.6885700 | 1305.6889151 |
| 2792:      | 70         | 11        | 60           | 1 71 11 61 0 |
| -0.0004995 | -0.0004000 | 0.0000000 | 1305.9489100 | 1305.9494095 |

|                                 |              |              |
|---------------------------------|--------------|--------------|
| 2793: 69 11 59 1 70 11 60 0     | 1306.2094400 | 1306.2098864 |
| -0.0004464 -0.0004000 0.0000000 |              |              |
| 2794: 68 11 58 1 69 11 59 0     | 1306.4703600 | 1306.4703440 |
| 0.0000160 -0.0004000 0.0000000  |              |              |
| 2795: 66 11 56 1 67 11 57 0     | 1306.9906800 | 1306.9911941 |
| -0.0005141 -0.0004000 0.0000000 |              |              |
| 2796: 65 11 55 1 66 11 56 0     | 1307.2511700 | 1307.2515829 |
| -0.0004129 -0.0004000 0.0000000 |              |              |
| 2797: 63 11 53 1 64 11 54 0     | 1307.7721900 | 1307.7722790 |
| -0.0000890 -0.0004000 0.0000000 |              |              |
| 2798: 62 11 52 1 63 11 53 0     | 1308.0326800 | 1308.0325827 |
| 0.0000973 -0.0004000 0.0000000  |              |              |
| 2799: 61 11 51 1 62 11 52 0     | 1308.2929000 | 1308.2928543 |
| 0.0000457 -0.0004000 0.0000000  |              |              |
| 2800: 60 11 50 1 61 11 51 0     | 1308.5528800 | 1308.5530923 |
| -0.0002123 -0.0004000 0.0000000 |              |              |
| 2801: 59 11 49 1 60 11 50 0     | 1308.8133000 | 1308.8132946 |
| 0.0000054 -0.0004000 0.0000000  |              |              |
| 2802: 58 11 48 1 59 11 49 0     | 1309.0732400 | 1309.0734597 |
| -0.0002197 -0.0004000 0.0000000 |              |              |
| 2803: 56 11 46 1 57 11 47 0     | 1309.5933000 | 1309.5936707 |
| -0.0003707 -0.0004000 0.0000000 |              |              |
| 2804: 54 11 44 1 55 11 45 0     | 1310.1137900 | 1310.1137113 |
| 0.0000787 -0.0004000 0.0000000  |              |              |
| 2805: 53 11 43 1 54 11 44 0     | 1310.3739100 | 1310.3736632 |
| 0.0002468 -0.0004000 0.0000000  |              |              |
| 2806: 52 11 42 1 53 11 43 0     | 1310.6335900 | 1310.6335674 |
| 0.0000226 -0.0004000 0.0000000  |              |              |
| 2807: 51 11 41 1 52 11 42 0     | 1310.8935300 | 1310.8934219 |
| 0.0001081 -0.0004000 0.0000000  |              |              |
| 2808: 50 11 40 1 51 11 41 0     | 1311.1531400 | 1311.1532252 |
| -0.0000852 -0.0004000 0.0000000 |              |              |
| 2809: 49 11 39 1 50 11 40 0     | 1311.4129400 | 1311.4129754 |
| -0.0000354 -0.0004000 0.0000000 |              |              |
| 2810: 48 11 38 1 49 11 39 0     | 1311.6730100 | 1311.6726710 |
| 0.0003390 -0.0004000 0.0000000  |              |              |
| 2811: 47 11 37 1 48 11 38 0     | 1311.9326500 | 1311.9323101 |
| 0.0003399 -0.0004000 0.0000000  |              |              |
| 2812: 46 11 36 1 47 11 37 0     | 1312.1921300 | 1312.1918912 |
| 0.0002388 -0.0004000 0.0000000  |              |              |
| 2813: 45 11 35 1 46 11 36 0     | 1312.4514600 | 1312.4514124 |
| 0.0000476 -0.0004000 0.0000000  |              |              |
| 2814: 44 11 34 1 45 11 35 0     | 1312.7114100 | 1312.7108722 |
| 0.0005378 -0.0004000 0.0000000  |              |              |
| 2815: 43 11 33 1 44 11 34 0     | 1312.9705200 | 1312.9702689 |
| 0.0002511 -0.0004000 0.0000000  |              |              |
| 2816: 42 11 32 1 43 11 33 0     | 1313.2298100 | 1313.2296008 |
| 0.0002092 -0.0004000 0.0000000  |              |              |
| 2817: 41 11 31 1 42 11 32 0     | 1313.4888600 | 1313.4888663 |
| -0.0000063 -0.0004000 0.0000000 |              |              |
| 2818: 40 11 30 1 41 11 31 0     | 1313.7483500 | 1313.7480637 |
| 0.0002863 -0.0004000 0.0000000  |              |              |
| 2819: 38 11 28 1 39 11 29 0     | 1314.2661100 | 1314.2662478 |
| -0.0001378 -0.0004000 0.0000000 |              |              |
| 2820: 37 11 27 1 38 11 28 0     | 1314.5252000 | 1314.5252313 |
| -0.0000313 -0.0004000 0.0000000 |              |              |
| 2821: 34 11 24 1 35 11 25 0     | 1315.3020900 | 1315.3017282 |
| 0.0003618 -0.0004000 0.0000000  |              |              |
| 2822: 33 11 23 1 34 11 24 0     | 1315.5603500 | 1315.5604040 |
| -0.0000540 -0.0004000 0.0000000 |              |              |
| 2823: 32 11 22 1 33 11 23 0     | 1315.8192200 | 1315.8189990 |
| 0.0002210 -0.0004000 0.0000000  |              |              |
| 2824: 31 11 21 1 32 11 22 0     | 1316.0777200 | 1316.0775115 |
| 0.0002085 -0.0004000 0.0000000  |              |              |
| 2825: 30 11 20 1 31 11 21 0     | 1316.3360500 | 1316.3359401 |



|            |            |           |              |              |            |
|------------|------------|-----------|--------------|--------------|------------|
| 0.0001099  | -0.0004000 | 0.0000000 |              |              |            |
| 2826:      | 29         | 11        | 19           | 1            | 30 11 20 0 |
| -0.0001632 | -0.0004000 | 0.0000000 | 1316.5941200 | 1316.5942832 |            |
| 2827:      | 26         | 11        | 16           | 1            | 27 11 17 0 |
| 0.0000459  | -0.0004000 | 0.0000000 | 1317.3688300 | 1317.3687841 |            |
| 2828:      | 24         | 11        | 14           | 1            | 25 11 15 0 |
| 0.0002474  | -0.0004000 | 0.0000000 | 1317.8849100 | 1317.8846626 |            |
| 2829:      | 23         | 11        | 13           | 1            | 24 11 14 0 |
| 0.0000092  | -0.0004000 | 0.0000000 | 1318.1424700 | 1318.1424608 |            |
| 2830:      | 20         | 11        | 10           | 1            | 21 11 11 0 |
| 0.0001567  | -0.0004000 | 0.0000000 | 1318.9154300 | 1318.9152733 |            |
| 2831:      | 19         | 11        | 9            | 1            | 20 11 10 0 |
| -0.0004586 | -0.0004000 | 0.0000000 | 1319.1722200 | 1319.1726786 |            |
| 2832:      | 18         | 11        | 8            | 1            | 19 11 9 0  |
| -0.0001920 | -0.0004000 | 0.0000000 | 1319.4297900 | 1319.4299820 |            |
| 2833:      | 17         | 11        | 7            | 1            | 18 11 8 0  |
| -0.0001422 | -0.0004000 | 0.0000000 | 1319.6870400 | 1319.6871822 |            |
| 2834:      | 16         | 11        | 6            | 1            | 17 11 7 0  |
| 0.0000124  | -0.0004000 | 0.0000000 | 1319.9442900 | 1319.9442776 |            |
| 2835:      | 15         | 11        | 5            | 1            | 16 11 6 0  |
| -0.0001070 | -0.0004000 | 0.0000000 | 1320.2011600 | 1320.2012670 |            |
| 2836:      | 14         | 11        | 4            | 1            | 15 11 5 0  |
| 0.0002711  | -0.0004000 | 0.0000000 | 1320.4584200 | 1320.4581489 |            |
| 2837:      | 16         | 11        | 6            | 1            | 15 11 5 0  |
| 0.0005329  | -0.0004000 | 0.0000000 | 1328.3614300 | 1328.3608971 |            |
| 2838:      | 17         | 11        | 7            | 1            | 16 11 6 0  |
| 0.0005035  | -0.0004000 | 0.0000000 | 1328.6141500 | 1328.6136465 |            |
| 2839:      | 31         | 11        | 21           | 1            | 30 11 20 0 |
| 0.0001124  | -0.0004000 | 0.0000000 | 1332.1360200 | 1332.1359076 |            |
| 2840:      | 32         | 11        | 22           | 1            | 31 11 21 0 |
| 0.0003682  | -0.0004000 | 0.0000000 | 1332.3866600 | 1332.3862918 |            |
| 2841:      | 33         | 11        | 23           | 1            | 32 11 22 0 |
| 0.0001208  | -0.0004000 | 0.0000000 | 1332.6366300 | 1332.6365092 |            |
| 2842:      | 35         | 11        | 25           | 1            | 34 11 24 0 |
| 0.0000216  | -0.0004000 | 0.0000000 | 1333.1364600 | 1333.1364384 |            |
| 2843:      | 36         | 11        | 26           | 1            | 35 11 25 0 |
| -0.0001980 | -0.0004000 | 0.0000000 | 1333.3859500 | 1333.3861480 |            |
| 2844:      | 40         | 11        | 30           | 1            | 39 11 29 0 |
| -0.0002593 | -0.0004000 | 0.0000000 | 1334.3830000 | 1334.3832593 |            |
| 2845:      | 41         | 11        | 31           | 1            | 40 11 30 0 |
| -0.0002396 | -0.0004000 | 0.0000000 | 1334.6318600 | 1334.6320996 |            |
| 2846:      | 42         | 11        | 32           | 1            | 41 11 31 0 |
| 0.0000774  | -0.0004000 | 0.0000000 | 1334.8808400 | 1334.8807626 |            |
| 2847:      | 43         | 11        | 33           | 1            | 42 11 32 0 |
| -0.0003970 | -0.0004000 | 0.0000000 | 1335.1288500 | 1335.1292470 |            |
| 2848:      | 44         | 11        | 34           | 1            | 43 11 33 0 |
| -0.0000518 | -0.0004000 | 0.0000000 | 1335.3775000 | 1335.3775518 |            |
| 2849:      | 45         | 11        | 35           | 1            | 44 11 34 0 |
| 0.0002042  | -0.0004000 | 0.0000000 | 1335.6258800 | 1335.6256758 |            |
| 2850:      | 46         | 11        | 36           | 1            | 45 11 35 0 |
| -0.0000477 | -0.0004000 | 0.0000000 | 1335.8735700 | 1335.8736177 |            |
| 2851:      | 47         | 11        | 37           | 1            | 46 11 36 0 |
| 0.0000235  | -0.0004000 | 0.0000000 | 1336.1214000 | 1336.1213765 |            |
| 2852:      | 48         | 11        | 38           | 1            | 47 11 37 0 |
| 0.0000090  | -0.0004000 | 0.0000000 | 1336.3689600 | 1336.3689510 |            |
| 2853:      | 49         | 11        | 39           | 1            | 48 11 38 0 |
| -0.0001099 | -0.0004000 | 0.0000000 | 1336.6162300 | 1336.6163399 |            |
| 2854:      | 52         | 11        | 42           | 1            | 51 11 41 0 |
| -0.0000919 | -0.0004000 | 0.0000000 | 1337.3572900 | 1337.3573819 |            |
| 2855:      | 53         | 11        | 43           | 1            | 52 11 42 0 |
| 0.0000330  | -0.0004000 | 0.0000000 | 1337.6040500 | 1337.6040170 |            |
| 2856:      | 56         | 11        | 46           | 1            | 55 11 45 0 |
| 0.0002711  | -0.0004000 | 0.0000000 | 1338.3430400 | 1338.3427689 |            |
| 2857:      | 60         | 11        | 50           | 1            | 59 11 49 0 |
| 0.0004046  | -0.0004000 | 0.0000000 | 1339.3254400 | 1339.3250354 |            |

|       |            |            |           |   |    |    |    |   |              |              |
|-------|------------|------------|-----------|---|----|----|----|---|--------------|--------------|
| 2858: | 61         | 11         | 51        | 1 | 60 | 11 | 50 | 0 | 1339.5705500 | 1339.5701054 |
|       | 0.0004446  | -0.0004000 | 0.0000000 |   |    |    |    |   |              |              |
| 2859: | 74         | 11         | 64        | 1 | 73 | 11 | 63 | 0 | 1342.7371500 | 1342.7372686 |
|       | -0.0001186 | -0.0004000 | 0.0000000 |   |    |    |    |   |              |              |
| 2860: | 76         | 11         | 66        | 1 | 75 | 11 | 65 | 0 | 1343.2209700 | 1343.2213348 |
|       | -0.0003648 | -0.0004000 | 0.0000000 |   |    |    |    |   |              |              |
| 2861: | 78         | 11         | 68        | 1 | 77 | 11 | 67 | 0 | 1343.7038200 | 1343.7045220 |
|       | -0.0007020 | -0.0004000 | 0.0000000 |   |    |    |    |   |              |              |
| 2862: | 79         | 11         | 69        | 1 | 78 | 11 | 68 | 0 | 1343.9459000 | 1343.9457828 |
|       | 0.0001172  | -0.0004000 | 0.0000000 |   |    |    |    |   |              |              |
| 2863: | 80         | 11         | 70        | 1 | 79 | 11 | 69 | 0 | 1344.1869600 | 1344.1868200 |
|       | 0.0001400  | -0.0004000 | 0.0000000 |   |    |    |    |   |              |              |
| 2864: | 81         | 11         | 71        | 1 | 80 | 11 | 70 | 0 | 1344.4274000 | 1344.4276323 |
|       | -0.0002323 | -0.0004000 | 0.0000000 |   |    |    |    |   |              |              |
| 2865: | 82         | 11         | 72        | 1 | 81 | 11 | 71 | 0 | 1344.6684200 | 1344.6682185 |
|       | 0.0002015  | -0.0004000 | 0.0000000 |   |    |    |    |   |              |              |
| 2866: | 77         | 12         | 65        | 1 | 78 | 12 | 66 | 0 | 1303.8870800 | 1303.8870374 |
|       | 0.0000426  | -0.0004000 | 0.0000000 |   |    |    |    |   |              |              |
| 2867: | 76         | 12         | 64        | 1 | 77 | 12 | 65 | 0 | 1304.1477300 | 1304.1474808 |
|       | 0.0002492  | -0.0004000 | 0.0000000 |   |    |    |    |   |              |              |
| 2868: | 75         | 12         | 63        | 1 | 76 | 12 | 64 | 0 | 1304.4084500 | 1304.4079194 |
|       | 0.0005306  | -0.0004000 | 0.0000000 |   |    |    |    |   |              |              |
| 2869: | 74         | 12         | 62        | 1 | 75 | 12 | 63 | 0 | 1304.6683500 | 1304.6683515 |
|       | -0.0000015 | -0.0004000 | 0.0000000 |   |    |    |    |   |              |              |
| 2870: | 72         | 12         | 60        | 1 | 73 | 12 | 61 | 0 | 1305.1897100 | 1305.1891887 |
|       | 0.0005213  | -0.0004000 | 0.0000000 |   |    |    |    |   |              |              |
| 2871: | 70         | 12         | 58        | 1 | 71 | 12 | 59 | 0 | 1305.7099500 | 1305.7099783 |
|       | -0.0000283 | -0.0004000 | 0.0000000 |   |    |    |    |   |              |              |
| 2872: | 69         | 12         | 57        | 1 | 70 | 12 | 58 | 0 | 1305.9707300 | 1305.9703507 |
|       | 0.0003793  | -0.0004000 | 0.0000000 |   |    |    |    |   |              |              |
| 2873: | 68         | 12         | 56        | 1 | 69 | 12 | 57 | 0 | 1306.2308200 | 1306.2307059 |
|       | 0.0001141  | -0.0004000 | 0.0000000 |   |    |    |    |   |              |              |
| 2874: | 67         | 12         | 55        | 1 | 68 | 12 | 56 | 0 | 1306.4910800 | 1306.4910421 |
|       | 0.0000379  | -0.0004000 | 0.0000000 |   |    |    |    |   |              |              |
| 2875: | 66         | 12         | 54        | 1 | 67 | 12 | 55 | 0 | 1306.7516300 | 1306.7513574 |
|       | 0.0002726  | -0.0004000 | 0.0000000 |   |    |    |    |   |              |              |
| 2876: | 65         | 12         | 53        | 1 | 66 | 12 | 54 | 0 | 1307.0112900 | 1307.0116502 |
|       | -0.0003602 | -0.0004000 | 0.0000000 |   |    |    |    |   |              |              |
| 2877: | 64         | 12         | 52        | 1 | 65 | 12 | 53 | 0 | 1307.2716900 | 1307.2719187 |
|       | -0.0002287 | -0.0004000 | 0.0000000 |   |    |    |    |   |              |              |
| 2878: | 63         | 12         | 51        | 1 | 64 | 12 | 52 | 0 | 1307.5318300 | 1307.5321611 |
|       | -0.0003311 | -0.0004000 | 0.0000000 |   |    |    |    |   |              |              |
| 2879: | 62         | 12         | 50        | 1 | 63 | 12 | 51 | 0 | 1307.7924000 | 1307.7923757 |
|       | 0.0000243  | -0.0004000 | 0.0000000 |   |    |    |    |   |              |              |
| 2880: | 61         | 12         | 49        | 1 | 62 | 12 | 50 | 0 | 1308.0521900 | 1308.0525607 |
|       | -0.0003707 | -0.0004000 | 0.0000000 |   |    |    |    |   |              |              |
| 2881: | 60         | 12         | 48        | 1 | 61 | 12 | 49 | 0 | 1308.3126500 | 1308.3127144 |
|       | -0.0000644 | -0.0004000 | 0.0000000 |   |    |    |    |   |              |              |
| 2882: | 59         | 12         | 47        | 1 | 60 | 12 | 48 | 0 | 1308.5728900 | 1308.5728351 |
|       | 0.0000549  | -0.0004000 | 0.0000000 |   |    |    |    |   |              |              |
| 2883: | 57         | 12         | 45        | 1 | 58 | 12 | 46 | 0 | 1309.0928100 | 1309.0929702 |
|       | -0.0001602 | -0.0004000 | 0.0000000 |   |    |    |    |   |              |              |
| 2884: | 56         | 12         | 44        | 1 | 57 | 12 | 45 | 0 | 1309.3526600 | 1309.3529812 |
|       | -0.0003212 | -0.0004000 | 0.0000000 |   |    |    |    |   |              |              |
| 2885: | 55         | 12         | 43        | 1 | 56 | 12 | 44 | 0 | 1309.6125300 | 1309.6129523 |
|       | -0.0004223 | -0.0004000 | 0.0000000 |   |    |    |    |   |              |              |
| 2886: | 54         | 12         | 42        | 1 | 55 | 12 | 43 | 0 | 1309.8724800 | 1309.8728817 |
|       | -0.0004017 | -0.0004000 | 0.0000000 |   |    |    |    |   |              |              |
| 2887: | 53         | 12         | 41        | 1 | 54 | 12 | 42 | 0 | 1310.1321400 | 1310.1327677 |
|       | -0.0006277 | -0.0004000 | 0.0000000 |   |    |    |    |   |              |              |
| 2888: | 52         | 12         | 40        | 1 | 53 | 12 | 41 | 0 | 1310.3920600 | 1310.3926085 |
|       | -0.0005485 | -0.0004000 | 0.0000000 |   |    |    |    |   |              |              |
| 2889: | 51         | 12         | 39        | 1 | 52 | 12 | 40 | 0 | 1310.6519400 | 1310.6524026 |
|       | -0.0004626 | -0.0004000 | 0.0000000 |   |    |    |    |   |              |              |
| 2890: | 50         | 12         | 38        | 1 | 51 | 12 | 39 | 0 | 1310.9122200 | 1310.9121481 |

|            |                    |           |              |              |
|------------|--------------------|-----------|--------------|--------------|
| 0.0000719  | -0.0004000         | 0.0000000 |              |              |
| 2891: 49   | 12 37 1 50 12 38 0 |           | 1311.1720700 | 1311.1718434 |
| 0.0002266  | -0.0004000         | 0.0000000 |              |              |
| 2892: 46   | 12 34 1 47 12 35 0 |           | 1311.9507400 | 1311.9506112 |
| 0.0001288  | -0.0004000         | 0.0000000 |              |              |
| 2893: 45   | 12 33 1 46 12 34 0 |           | 1312.2095800 | 1312.2100889 |
| -0.0005089 | -0.0004000         | 0.0000000 |              |              |
| 2894: 44   | 12 32 1 45 12 33 0 |           | 1312.4692900 | 1312.4695080 |
| -0.0002180 | -0.0004000         | 0.0000000 |              |              |
| 2895: 43   | 12 31 1 44 12 32 0 |           | 1312.7283600 | 1312.7288668 |
| -0.0005068 | -0.0004000         | 0.0000000 |              |              |
| 2896: 41   | 12 29 1 42 12 30 0 |           | 1313.2471900 | 1313.2473971 |
| -0.0002071 | -0.0004000         | 0.0000000 |              |              |
| 2897: 39   | 12 27 1 40 12 28 0 |           | 1313.7658000 | 1313.7656667 |
| 0.0001333  | -0.0004000         | 0.0000000 |              |              |
| 2898: 38   | 12 26 1 39 12 27 0 |           | 1314.0249400 | 1314.0246996 |
| 0.0002404  | -0.0004000         | 0.0000000 |              |              |
| 2899: 33   | 12 21 1 34 12 22 0 |           | 1315.3188200 | 1315.3187809 |
| 0.0000391  | -0.0004000         | 0.0000000 |              |              |
| 2900: 31   | 12 19 1 32 12 20 0 |           | 1315.8354300 | 1315.8358780 |
| -0.0004480 | -0.0004000         | 0.0000000 |              |              |
| 2901: 30   | 12 18 1 31 12 19 0 |           | 1316.0940200 | 1316.0943055 |
| -0.0002855 | -0.0004000         | 0.0000000 |              |              |
| 2902: 29   | 12 17 1 30 12 18 0 |           | 1316.3519400 | 1316.3526501 |
| -0.0007101 | -0.0004000         | 0.0000000 |              |              |
| 2903: 28   | 12 16 1 29 12 17 0 |           | 1316.6108300 | 1316.6109104 |
| -0.0000804 | -0.0004000         | 0.0000000 |              |              |
| 2904: 25   | 12 13 1 26 12 14 0 |           | 1317.3848500 | 1317.3851693 |
| -0.0003193 | -0.0004000         | 0.0000000 |              |              |
| 2905: 23   | 12 11 1 24 12 12 0 |           | 1317.9007000 | 1317.9008916 |
| -0.0001916 | -0.0004000         | 0.0000000 |              |              |
| 2906: 22   | 12 10 1 23 12 11 0 |           | 1318.1586300 | 1318.1586131 |
| 0.0000169  | -0.0004000         | 0.0000000 |              |              |
| 2907: 21   | 12 9 1 22 12 10 0  |           | 1318.4161200 | 1318.4162394 |
| -0.0001194 | -0.0004000         | 0.0000000 |              |              |
| 2908: 20   | 12 8 1 21 12 9 0   |           | 1318.6738100 | 1318.6737691 |
| 0.0000409  | -0.0004000         | 0.0000000 |              |              |
| 2909: 19   | 12 7 1 20 12 8 0   |           | 1318.9311100 | 1318.9312006 |
| -0.0000906 | -0.0004000         | 0.0000000 |              |              |
| 2910: 18   | 12 6 1 19 12 7 0   |           | 1319.1888600 | 1319.1885324 |
| 0.0003276  | -0.0004000         | 0.0000000 |              |              |
| 2911: 17   | 12 5 1 18 12 6 0   |           | 1319.4455900 | 1319.4457631 |
| -0.0001731 | -0.0004000         | 0.0000000 |              |              |
| 2912: 14   | 12 2 1 13 12 1 0   |           | 1327.6152100 | 1327.6151166 |
| 0.0000934  | -0.0004000         | 0.0000000 |              |              |
| 2913: 15   | 12 3 1 14 12 2 0   |           | 1327.8685200 | 1327.8682098 |
| 0.0003102  | -0.0004000         | 0.0000000 |              |              |
| 2914: 18   | 12 6 1 17 12 5 0   |           | 1328.6267500 | 1328.6265919 |
| 0.0001581  | -0.0004000         | 0.0000000 |              |              |
| 2915: 19   | 12 7 1 18 12 6 0   |           | 1328.8787700 | 1328.8790824 |
| -0.0003124 | -0.0004000         | 0.0000000 |              |              |
| 2916: 20   | 12 8 1 19 12 7 0   |           | 1329.1315100 | 1329.1314190 |
| 0.0000910  | -0.0004000         | 0.0000000 |              |              |
| 2917: 21   | 12 9 1 20 12 8 0   |           | 1329.3833700 | 1329.3836002 |
| -0.0002302 | -0.0004000         | 0.0000000 |              |              |
| 2918: 22   | 12 10 1 21 12 9 0  |           | 1329.6355700 | 1329.6356249 |
| -0.0000549 | -0.0004000         | 0.0000000 |              |              |
| 2919: 23   | 12 11 1 22 12 10 0 |           | 1329.8874600 | 1329.8874916 |
| -0.0000316 | -0.0004000         | 0.0000000 |              |              |
| 2920: 24   | 12 12 1 23 12 11 0 |           | 1330.1392900 | 1330.1391990 |
| 0.0000910  | -0.0004000         | 0.0000000 |              |              |
| 2921: 25   | 12 13 1 24 12 12 0 |           | 1330.3909000 | 1330.3907459 |
| 0.0001541  | -0.0004000         | 0.0000000 |              |              |
| 2922: 26   | 12 14 1 25 12 13 0 |           | 1330.6423400 | 1330.6421308 |
| 0.0002092  | -0.0004000         | 0.0000000 |              |              |

|       |            |            |           |   |    |    |    |   |              |              |
|-------|------------|------------|-----------|---|----|----|----|---|--------------|--------------|
| 2923: | 28         | 12         | 16        | 1 | 27 | 12 | 15 | 0 | 1331.1446600 | 1331.1444097 |
|       | 0.0002503  | -0.0004000 | 0.0000000 |   |    |    |    |   |              |              |
| 2924: | 29         | 12         | 17        | 1 | 28 | 12 | 16 | 0 | 1331.3951800 | 1331.3953011 |
|       | -0.0001211 | -0.0004000 | 0.0000000 |   |    |    |    |   |              |              |
| 2925: | 30         | 12         | 18        | 1 | 29 | 12 | 17 | 0 | 1331.6459200 | 1331.6460252 |
|       | -0.0001052 | -0.0004000 | 0.0000000 |   |    |    |    |   |              |              |
| 2926: | 43         | 12         | 31        | 1 | 42 | 12 | 30 | 0 | 1334.8900200 | 1334.8896219 |
|       | 0.0003981  | -0.0004000 | 0.0000000 |   |    |    |    |   |              |              |
| 2927: | 44         | 12         | 32        | 1 | 43 | 12 | 31 | 0 | 1335.1376400 | 1335.1378660 |
|       | -0.0002260 | -0.0004000 | 0.0000000 |   |    |    |    |   |              |              |
| 2928: | 45         | 12         | 33        | 1 | 44 | 12 | 32 | 0 | 1335.3858300 | 1335.3859228 |
|       | -0.0000928 | -0.0004000 | 0.0000000 |   |    |    |    |   |              |              |
| 2929: | 46         | 12         | 34        | 1 | 45 | 12 | 33 | 0 | 1335.6340400 | 1335.6337910 |
|       | 0.0002490  | -0.0004000 | 0.0000000 |   |    |    |    |   |              |              |
| 2930: | 47         | 12         | 35        | 1 | 46 | 12 | 34 | 0 | 1335.8814700 | 1335.8814694 |
|       | 0.0000006  | -0.0004000 | 0.0000000 |   |    |    |    |   |              |              |
| 2931: | 48         | 12         | 36        | 1 | 47 | 12 | 35 | 0 | 1336.1292000 | 1336.1289564 |
|       | 0.0002436  | -0.0004000 | 0.0000000 |   |    |    |    |   |              |              |
| 2932: | 50         | 12         | 38        | 1 | 49 | 12 | 37 | 0 | 1336.6235000 | 1336.6233511 |
|       | 0.0001489  | -0.0004000 | 0.0000000 |   |    |    |    |   |              |              |
| 2933: | 52         | 12         | 40        | 1 | 51 | 12 | 39 | 0 | 1337.1166900 | 1337.1169640 |
|       | -0.0002740 | -0.0004000 | 0.0000000 |   |    |    |    |   |              |              |
| 2934: | 53         | 12         | 41        | 1 | 52 | 12 | 40 | 0 | 1337.3637100 | 1337.3634739 |
|       | 0.0002361  | -0.0004000 | 0.0000000 |   |    |    |    |   |              |              |
| 2935: | 54         | 12         | 42        | 1 | 53 | 12 | 41 | 0 | 1337.6098800 | 1337.6097842 |
|       | 0.0000958  | -0.0004000 | 0.0000000 |   |    |    |    |   |              |              |
| 2936: | 56         | 12         | 44        | 1 | 55 | 12 | 43 | 0 | 1338.1016000 | 1338.1018005 |
|       | -0.0002005 | -0.0004000 | 0.0000000 |   |    |    |    |   |              |              |
| 2937: | 57         | 12         | 45        | 1 | 56 | 12 | 44 | 0 | 1338.3476700 | 1338.3475036 |
|       | 0.0001664  | -0.0004000 | 0.0000000 |   |    |    |    |   |              |              |
| 2938: | 58         | 12         | 46        | 1 | 57 | 12 | 45 | 0 | 1338.5928600 | 1338.5930015 |
|       | -0.0001415 | -0.0004000 | 0.0000000 |   |    |    |    |   |              |              |
| 2939: | 60         | 12         | 48        | 1 | 59 | 12 | 47 | 0 | 1339.0840000 | 1339.0833759 |
|       | 0.0006241  | -0.0004000 | 0.0000000 |   |    |    |    |   |              |              |
| 2940: | 61         | 12         | 49        | 1 | 60 | 12 | 48 | 0 | 1339.3287900 | 1339.3282496 |
|       | 0.0005404  | -0.0004000 | 0.0000000 |   |    |    |    |   |              |              |
| 2941: | 75         | 12         | 63        | 1 | 74 | 12 | 62 | 0 | 1342.7339800 | 1342.7336645 |
|       | 0.0003155  | -0.0004000 | 0.0000000 |   |    |    |    |   |              |              |
| 2942: | 76         | 12         | 64        | 1 | 75 | 12 | 63 | 0 | 1342.9752200 | 1342.9752190 |
|       | 0.0000010  | -0.0004000 | 0.0000000 |   |    |    |    |   |              |              |
| 2943: | 78         | 12         | 66        | 1 | 77 | 12 | 65 | 0 | 1343.4577200 | 1343.4576266 |
|       | 0.0000934  | -0.0004000 | 0.0000000 |   |    |    |    |   |              |              |
| 2944: | 79         | 12         | 67        | 1 | 78 | 12 | 66 | 0 | 1343.6987500 | 1343.6984764 |
|       | 0.0002736  | -0.0004000 | 0.0000000 |   |    |    |    |   |              |              |
| 2945: | 80         | 12         | 68        | 1 | 79 | 12 | 67 | 0 | 1343.9391400 | 1343.9390882 |
|       | 0.0000518  | -0.0004000 | 0.0000000 |   |    |    |    |   |              |              |
| 2946: | 77         | 12         | 66        | 1 | 78 | 12 | 67 | 0 | 1303.8870800 | 1303.8870374 |
|       | 0.0000426  | -0.0004000 | 0.0000000 |   |    |    |    |   |              |              |
| 2947: | 76         | 12         | 65        | 1 | 77 | 12 | 66 | 0 | 1304.1477300 | 1304.1474808 |
|       | 0.0002492  | -0.0004000 | 0.0000000 |   |    |    |    |   |              |              |
| 2948: | 75         | 12         | 64        | 1 | 76 | 12 | 65 | 0 | 1304.4084500 | 1304.4079194 |
|       | 0.0005306  | -0.0004000 | 0.0000000 |   |    |    |    |   |              |              |
| 2949: | 74         | 12         | 63        | 1 | 75 | 12 | 64 | 0 | 1304.6683500 | 1304.6683515 |
|       | -0.0000015 | -0.0004000 | 0.0000000 |   |    |    |    |   |              |              |
| 2950: | 72         | 12         | 61        | 1 | 73 | 12 | 62 | 0 | 1305.1897100 | 1305.1891887 |
|       | 0.0005213  | -0.0004000 | 0.0000000 |   |    |    |    |   |              |              |
| 2951: | 70         | 12         | 59        | 1 | 71 | 12 | 60 | 0 | 1305.7099500 | 1305.7099783 |
|       | -0.0000283 | -0.0004000 | 0.0000000 |   |    |    |    |   |              |              |
| 2952: | 69         | 12         | 58        | 1 | 70 | 12 | 59 | 0 | 1305.9707300 | 1305.9703507 |
|       | 0.0003793  | -0.0004000 | 0.0000000 |   |    |    |    |   |              |              |
| 2953: | 68         | 12         | 57        | 1 | 69 | 12 | 58 | 0 | 1306.2308200 | 1306.2307059 |
|       | 0.0001141  | -0.0004000 | 0.0000000 |   |    |    |    |   |              |              |
| 2954: | 67         | 12         | 56        | 1 | 68 | 12 | 57 | 0 | 1306.4910800 | 1306.4910421 |
|       | 0.0000379  | -0.0004000 | 0.0000000 |   |    |    |    |   |              |              |
| 2955: | 66         | 12         | 55        | 1 | 67 | 12 | 56 | 0 | 1306.7516300 | 1306.7513574 |

|            |            |           |       |                             |
|------------|------------|-----------|-------|-----------------------------|
| 0.0002726  | -0.0004000 | 0.0000000 |       |                             |
| 2956: 65   | 12 54      | 1 66      | 12 55 | 0 1307.0112900 1307.0116502 |
| -0.0003602 | -0.0004000 | 0.0000000 |       |                             |
| 2957: 64   | 12 53      | 1 65      | 12 54 | 0 1307.2716900 1307.2719187 |
| -0.0002287 | -0.0004000 | 0.0000000 |       |                             |
| 2958: 63   | 12 52      | 1 64      | 12 53 | 0 1307.5318300 1307.5321611 |
| -0.0003311 | -0.0004000 | 0.0000000 |       |                             |
| 2959: 62   | 12 51      | 1 63      | 12 52 | 0 1307.7924000 1307.7923757 |
| 0.0000243  | -0.0004000 | 0.0000000 |       |                             |
| 2960: 61   | 12 50      | 1 62      | 12 51 | 0 1308.0521900 1308.0525607 |
| -0.0003707 | -0.0004000 | 0.0000000 |       |                             |
| 2961: 60   | 12 49      | 1 61      | 12 50 | 0 1308.3126500 1308.3127144 |
| -0.0000644 | -0.0004000 | 0.0000000 |       |                             |
| 2962: 59   | 12 48      | 1 60      | 12 49 | 0 1308.5728900 1308.5728351 |
| 0.0000549  | -0.0004000 | 0.0000000 |       |                             |
| 2963: 57   | 12 46      | 1 58      | 12 47 | 0 1309.0928100 1309.0929702 |
| -0.0001602 | -0.0004000 | 0.0000000 |       |                             |
| 2964: 56   | 12 45      | 1 57      | 12 46 | 0 1309.3526600 1309.3529812 |
| -0.0003212 | -0.0004000 | 0.0000000 |       |                             |
| 2965: 55   | 12 44      | 1 56      | 12 45 | 0 1309.6125300 1309.6129523 |
| -0.0004223 | -0.0004000 | 0.0000000 |       |                             |
| 2966: 54   | 12 43      | 1 55      | 12 44 | 0 1309.8724800 1309.8728817 |
| -0.0004017 | -0.0004000 | 0.0000000 |       |                             |
| 2967: 53   | 12 42      | 1 54      | 12 43 | 0 1310.1321400 1310.1327677 |
| -0.0006277 | -0.0004000 | 0.0000000 |       |                             |
| 2968: 52   | 12 41      | 1 53      | 12 42 | 0 1310.3920600 1310.3926085 |
| -0.0005485 | -0.0004000 | 0.0000000 |       |                             |
| 2969: 51   | 12 40      | 1 52      | 12 41 | 0 1310.6519400 1310.6524026 |
| -0.0004626 | -0.0004000 | 0.0000000 |       |                             |
| 2970: 50   | 12 39      | 1 51      | 12 40 | 0 1310.9122200 1310.9121481 |
| 0.0000719  | -0.0004000 | 0.0000000 |       |                             |
| 2971: 49   | 12 38      | 1 50      | 12 39 | 0 1311.1720700 1311.1718434 |
| 0.0002266  | -0.0004000 | 0.0000000 |       |                             |
| 2972: 46   | 12 35      | 1 47      | 12 36 | 0 1311.9507400 1311.9506112 |
| 0.0001288  | -0.0004000 | 0.0000000 |       |                             |
| 2973: 45   | 12 34      | 1 46      | 12 35 | 0 1312.2095800 1312.2100889 |
| -0.0005089 | -0.0004000 | 0.0000000 |       |                             |
| 2974: 44   | 12 33      | 1 45      | 12 34 | 0 1312.4692900 1312.4695080 |
| -0.0002180 | -0.0004000 | 0.0000000 |       |                             |
| 2975: 43   | 12 32      | 1 44      | 12 33 | 0 1312.7283600 1312.7288668 |
| -0.0005068 | -0.0004000 | 0.0000000 |       |                             |
| 2976: 41   | 12 30      | 1 42      | 12 31 | 0 1313.2471900 1313.2473971 |
| -0.0002071 | -0.0004000 | 0.0000000 |       |                             |
| 2977: 39   | 12 28      | 1 40      | 12 29 | 0 1313.7658000 1313.7656667 |
| 0.0001333  | -0.0004000 | 0.0000000 |       |                             |
| 2978: 38   | 12 27      | 1 39      | 12 28 | 0 1314.0249400 1314.0246996 |
| 0.0002404  | -0.0004000 | 0.0000000 |       |                             |
| 2979: 33   | 12 22      | 1 34      | 12 23 | 0 1315.3188200 1315.3187809 |
| 0.0000391  | -0.0004000 | 0.0000000 |       |                             |
| 2980: 31   | 12 20      | 1 32      | 12 21 | 0 1315.8354300 1315.8358780 |
| -0.0004480 | -0.0004000 | 0.0000000 |       |                             |
| 2981: 30   | 12 19      | 1 31      | 12 20 | 0 1316.0940200 1316.0943055 |
| -0.0002855 | -0.0004000 | 0.0000000 |       |                             |
| 2982: 29   | 12 18      | 1 30      | 12 19 | 0 1316.3519400 1316.3526501 |
| -0.0007101 | -0.0004000 | 0.0000000 |       |                             |
| 2983: 28   | 12 17      | 1 29      | 12 18 | 0 1316.6108300 1316.6109104 |
| -0.0000804 | -0.0004000 | 0.0000000 |       |                             |
| 2984: 25   | 12 14      | 1 26      | 12 15 | 0 1317.3848500 1317.3851693 |
| -0.0003193 | -0.0004000 | 0.0000000 |       |                             |
| 2985: 23   | 12 12      | 1 24      | 12 13 | 0 1317.9007000 1317.9008916 |
| -0.0001916 | -0.0004000 | 0.0000000 |       |                             |
| 2986: 22   | 12 11      | 1 23      | 12 12 | 0 1318.1586300 1318.1586131 |
| 0.0000169  | -0.0004000 | 0.0000000 |       |                             |
| 2987: 21   | 12 10      | 1 22      | 12 11 | 0 1318.4161200 1318.4162394 |
| -0.0001194 | -0.0004000 | 0.0000000 |       |                             |

|            |            |           |    |   |    |    |    |   |              |              |
|------------|------------|-----------|----|---|----|----|----|---|--------------|--------------|
| 2988:      | 20         | 12        | 9  | 1 | 21 | 12 | 10 | 0 | 1318.6738100 | 1318.6737691 |
| 0.0000409  | -0.0004000 | 0.0000000 |    |   |    |    |    |   |              |              |
| 2989:      | 19         | 12        | 8  | 1 | 20 | 12 | 9  | 0 | 1318.9311100 | 1318.9312006 |
| -0.0000906 | -0.0004000 | 0.0000000 |    |   |    |    |    |   |              |              |
| 2990:      | 18         | 12        | 7  | 1 | 19 | 12 | 8  | 0 | 1319.1888600 | 1319.1885324 |
| 0.0003276  | -0.0004000 | 0.0000000 |    |   |    |    |    |   |              |              |
| 2991:      | 17         | 12        | 6  | 1 | 18 | 12 | 7  | 0 | 1319.4455900 | 1319.4457631 |
| -0.0001731 | -0.0004000 | 0.0000000 |    |   |    |    |    |   |              |              |
| 2992:      | 14         | 12        | 3  | 1 | 13 | 12 | 2  | 0 | 1327.6152100 | 1327.6151166 |
| 0.0000934  | -0.0004000 | 0.0000000 |    |   |    |    |    |   |              |              |
| 2993:      | 15         | 12        | 4  | 1 | 14 | 12 | 3  | 0 | 1327.8685200 | 1327.8682098 |
| 0.0003102  | -0.0004000 | 0.0000000 |    |   |    |    |    |   |              |              |
| 2994:      | 18         | 12        | 7  | 1 | 17 | 12 | 6  | 0 | 1328.6267500 | 1328.6265919 |
| 0.0001581  | -0.0004000 | 0.0000000 |    |   |    |    |    |   |              |              |
| 2995:      | 19         | 12        | 8  | 1 | 18 | 12 | 7  | 0 | 1328.8787700 | 1328.8790824 |
| -0.0003124 | -0.0004000 | 0.0000000 |    |   |    |    |    |   |              |              |
| 2996:      | 20         | 12        | 9  | 1 | 19 | 12 | 8  | 0 | 1329.1315100 | 1329.1314190 |
| 0.0000910  | -0.0004000 | 0.0000000 |    |   |    |    |    |   |              |              |
| 2997:      | 21         | 12        | 10 | 1 | 20 | 12 | 9  | 0 | 1329.3833700 | 1329.3836002 |
| -0.0002302 | -0.0004000 | 0.0000000 |    |   |    |    |    |   |              |              |
| 2998:      | 22         | 12        | 11 | 1 | 21 | 12 | 10 | 0 | 1329.6355700 | 1329.6356249 |
| -0.0000549 | -0.0004000 | 0.0000000 |    |   |    |    |    |   |              |              |
| 2999:      | 23         | 12        | 12 | 1 | 22 | 12 | 11 | 0 | 1329.8874600 | 1329.8874916 |
| -0.0000316 | -0.0004000 | 0.0000000 |    |   |    |    |    |   |              |              |
| 3000:      | 24         | 12        | 13 | 1 | 23 | 12 | 12 | 0 | 1330.1392900 | 1330.1391990 |
| 0.0000910  | -0.0004000 | 0.0000000 |    |   |    |    |    |   |              |              |
| 3001:      | 25         | 12        | 14 | 1 | 24 | 12 | 13 | 0 | 1330.3909000 | 1330.3907459 |
| 0.0001541  | -0.0004000 | 0.0000000 |    |   |    |    |    |   |              |              |
| 3002:      | 26         | 12        | 15 | 1 | 25 | 12 | 14 | 0 | 1330.6423400 | 1330.6421308 |
| 0.0002092  | -0.0004000 | 0.0000000 |    |   |    |    |    |   |              |              |
| 3003:      | 28         | 12        | 17 | 1 | 27 | 12 | 16 | 0 | 1331.1446600 | 1331.1444097 |
| 0.0002503  | -0.0004000 | 0.0000000 |    |   |    |    |    |   |              |              |
| 3004:      | 29         | 12        | 18 | 1 | 28 | 12 | 17 | 0 | 1331.3951800 | 1331.3953011 |
| -0.0001211 | -0.0004000 | 0.0000000 |    |   |    |    |    |   |              |              |
| 3005:      | 30         | 12        | 19 | 1 | 29 | 12 | 18 | 0 | 1331.6459200 | 1331.6460252 |
| -0.0001052 | -0.0004000 | 0.0000000 |    |   |    |    |    |   |              |              |
| 3006:      | 43         | 12        | 32 | 1 | 42 | 12 | 31 | 0 | 1334.8900200 | 1334.8896219 |
| 0.0003981  | -0.0004000 | 0.0000000 |    |   |    |    |    |   |              |              |
| 3007:      | 44         | 12        | 33 | 1 | 43 | 12 | 32 | 0 | 1335.1376400 | 1335.1378660 |
| -0.0002260 | -0.0004000 | 0.0000000 |    |   |    |    |    |   |              |              |
| 3008:      | 45         | 12        | 34 | 1 | 44 | 12 | 33 | 0 | 1335.3858300 | 1335.3859228 |
| -0.0000928 | -0.0004000 | 0.0000000 |    |   |    |    |    |   |              |              |
| 3009:      | 46         | 12        | 35 | 1 | 45 | 12 | 34 | 0 | 1335.6340400 | 1335.6337910 |
| 0.0002490  | -0.0004000 | 0.0000000 |    |   |    |    |    |   |              |              |
| 3010:      | 47         | 12        | 36 | 1 | 46 | 12 | 35 | 0 | 1335.8814700 | 1335.8814694 |
| 0.0000006  | -0.0004000 | 0.0000000 |    |   |    |    |    |   |              |              |
| 3011:      | 48         | 12        | 37 | 1 | 47 | 12 | 36 | 0 | 1336.1292000 | 1336.1289564 |
| 0.0002436  | -0.0004000 | 0.0000000 |    |   |    |    |    |   |              |              |
| 3012:      | 50         | 12        | 39 | 1 | 49 | 12 | 38 | 0 | 1336.6235000 | 1336.6233511 |
| 0.0001489  | -0.0004000 | 0.0000000 |    |   |    |    |    |   |              |              |
| 3013:      | 52         | 12        | 41 | 1 | 51 | 12 | 40 | 0 | 1337.1166900 | 1337.1169640 |
| -0.0002740 | -0.0004000 | 0.0000000 |    |   |    |    |    |   |              |              |
| 3014:      | 53         | 12        | 42 | 1 | 52 | 12 | 41 | 0 | 1337.3637100 | 1337.3634739 |
| 0.0002361  | -0.0004000 | 0.0000000 |    |   |    |    |    |   |              |              |
| 3015:      | 54         | 12        | 43 | 1 | 53 | 12 | 42 | 0 | 1337.6098800 | 1337.6097842 |
| 0.0000958  | -0.0004000 | 0.0000000 |    |   |    |    |    |   |              |              |
| 3016:      | 56         | 12        | 45 | 1 | 55 | 12 | 44 | 0 | 1338.1016000 | 1338.1018005 |
| -0.0002005 | -0.0004000 | 0.0000000 |    |   |    |    |    |   |              |              |
| 3017:      | 57         | 12        | 46 | 1 | 56 | 12 | 45 | 0 | 1338.3476700 | 1338.3475036 |
| 0.0001664  | -0.0004000 | 0.0000000 |    |   |    |    |    |   |              |              |
| 3018:      | 58         | 12        | 47 | 1 | 57 | 12 | 46 | 0 | 1338.5928600 | 1338.5930015 |
| -0.0001415 | -0.0004000 | 0.0000000 |    |   |    |    |    |   |              |              |
| 3019:      | 60         | 12        | 49 | 1 | 59 | 12 | 48 | 0 | 1339.0840000 | 1339.0833759 |
| 0.0006241  | -0.0004000 | 0.0000000 |    |   |    |    |    |   |              |              |
| 3020:      | 61         | 12        | 50 | 1 | 60 | 12 | 49 | 0 | 1339.3287900 | 1339.3282496 |

|            |            |            |   |                           |
|------------|------------|------------|---|---------------------------|
| 0.0005404  | -0.0004000 | 0.0000000  |   |                           |
| 3021: 75   | 12 64      | 1 74 12 63 | 0 | 1342.7339800 1342.7336645 |
| 0.0003155  | -0.0004000 | 0.0000000  |   |                           |
| 3022: 76   | 12 65      | 1 75 12 64 | 0 | 1342.9752200 1342.9752190 |
| 0.0000010  | -0.0004000 | 0.0000000  |   |                           |
| 3023: 78   | 12 67      | 1 77 12 66 | 0 | 1343.4577200 1343.4576265 |
| 0.0000935  | -0.0004000 | 0.0000000  |   |                           |
| 3024: 79   | 12 68      | 1 78 12 67 | 0 | 1343.6987500 1343.6984764 |
| 0.0002736  | -0.0004000 | 0.0000000  |   |                           |
| 3025: 80   | 12 69      | 1 79 12 68 | 0 | 1343.9391400 1343.9390882 |
| 0.0000518  | -0.0004000 | 0.0000000  |   |                           |
| 3026: 86   | 13 73      | 1 87 13 74 | 0 | 1301.2834800 1301.2836132 |
| -0.0001332 | -0.0004000 | 0.0000000  |   |                           |
| 3027: 85   | 13 72      | 1 86 13 73 | 0 | 1301.5438700 1301.5439289 |
| -0.0000589 | -0.0004000 | 0.0000000  |   |                           |
| 3028: 84   | 13 71      | 1 85 13 72 | 0 | 1301.8043600 1301.8042566 |
| 0.0001034  | -0.0004000 | 0.0000000  |   |                           |
| 3029: 82   | 13 69      | 1 83 13 70 | 0 | 1302.3254200 1302.3249411 |
| 0.0004789  | -0.0004000 | 0.0000000  |   |                           |
| 3030: 78   | 13 65      | 1 79 13 66 | 0 | 1303.3667200 1303.3663779 |
| 0.0003421  | -0.0004000 | 0.0000000  |   |                           |
| 3031: 76   | 13 63      | 1 77 13 64 | 0 | 1303.8873000 1303.8871025 |
| 0.0001975  | -0.0004000 | 0.0000000  |   |                           |
| 3032: 75   | 13 62      | 1 76 13 63 | 0 | 1304.1473200 1304.1474603 |
| -0.0001403 | -0.0004000 | 0.0000000  |   |                           |
| 3033: 74   | 13 61      | 1 75 13 62 | 0 | 1304.4083400 1304.4078128 |
| 0.0005272  | -0.0004000 | 0.0000000  |   |                           |
| 3034: 73   | 13 60      | 1 74 13 61 | 0 | 1304.6682700 1304.6681583 |
| 0.0001117  | -0.0004000 | 0.0000000  |   |                           |
| 3035: 71   | 13 58      | 1 72 13 59 | 0 | 1305.1897200 1305.1888213 |
| 0.0008987  | -0.0004000 | 0.0000000  |   |                           |
| 3036: 69   | 13 56      | 1 70 13 57 | 0 | 1305.7097500 1305.7094355 |
| 0.0003145  | -0.0004000 | 0.0000000  |   |                           |
| 3037: 68   | 13 55      | 1 69 13 56 | 0 | 1305.9707500 1305.9697199 |
| 0.0010301  | -0.0004000 | 0.0000000  |   |                           |
| 3038: 67   | 13 54      | 1 68 13 55 | 0 | 1306.2306700 1306.2299870 |
| 0.0006830  | -0.0004000 | 0.0000000  |   |                           |
| 3039: 66   | 13 53      | 1 67 13 54 | 0 | 1306.4909200 1306.4902350 |
| 0.0006850  | -0.0004000 | 0.0000000  |   |                           |
| 3040: 64   | 13 51      | 1 65 13 52 | 0 | 1307.0106800 1307.0106669 |
| 0.0000131  | -0.0004000 | 0.0000000  |   |                           |
| 3041: 63   | 13 50      | 1 64 13 51 | 0 | 1307.2708900 1307.2708474 |
| 0.0000426  | -0.0004000 | 0.0000000  |   |                           |
| 3042: 62   | 13 49      | 1 63 13 50 | 0 | 1307.5310600 1307.5310019 |
| 0.0000581  | -0.0004000 | 0.0000000  |   |                           |
| 3043: 60   | 13 47      | 1 61 13 48 | 0 | 1308.0515000 1308.0512263 |
| 0.0002737  | -0.0004000 | 0.0000000  |   |                           |
| 3044: 58   | 13 45      | 1 59 13 46 | 0 | 1308.5710400 1308.5713265 |
| -0.0002865 | -0.0004000 | 0.0000000  |   |                           |
| 3045: 57   | 13 44      | 1 58 13 45 | 0 | 1308.8312000 1308.8313257 |
| -0.0001257 | -0.0004000 | 0.0000000  |   |                           |
| 3046: 56   | 13 43      | 1 57 13 44 | 0 | 1309.0916900 1309.0912888 |
| 0.0004012  | -0.0004000 | 0.0000000  |   |                           |
| 3047: 54   | 13 41      | 1 55 13 42 | 0 | 1309.6114800 1309.6110997 |
| 0.0003803  | -0.0004000 | 0.0000000  |   |                           |
| 3048: 53   | 13 40      | 1 54 13 41 | 0 | 1309.8715100 1309.8709442 |
| 0.0005658  | -0.0004000 | 0.0000000  |   |                           |
| 3049: 52   | 13 39      | 1 53 13 40 | 0 | 1310.1309800 1310.1307457 |
| 0.0002343  | -0.0004000 | 0.0000000  |   |                           |
| 3050: 51   | 13 38      | 1 52 13 39 | 0 | 1310.3912700 1310.3905027 |
| 0.0007673  | -0.0004000 | 0.0000000  |   |                           |
| 3051: 50   | 13 37      | 1 51 13 38 | 0 | 1310.6506900 1310.6502134 |
| 0.0004766  | -0.0004000 | 0.0000000  |   |                           |
| 3052: 49   | 13 36      | 1 50 13 37 | 0 | 1310.9101400 1310.9098762 |
| 0.0002638  | -0.0004000 | 0.0000000  |   |                           |

|            |            |           |    |   |    |    |    |   |              |              |
|------------|------------|-----------|----|---|----|----|----|---|--------------|--------------|
| 3053:      | 47         | 13        | 34 | 1 | 48 | 13 | 35 | 0 | 1311.4293200 | 1311.4290512 |
| 0.0002688  | -0.0004000 | 0.0000000 |    |   |    |    |    |   |              |              |
| 3054:      | 45         | 13        | 32 | 1 | 46 | 13 | 33 | 0 | 1311.9485500 | 1311.9480145 |
| 0.0005355  | -0.0004000 | 0.0000000 |    |   |    |    |    |   |              |              |
| 3055:      | 44         | 13        | 31 | 1 | 45 | 13 | 32 | 0 | 1312.2078400 | 1312.2074125 |
| 0.0004275  | -0.0004000 | 0.0000000 |    |   |    |    |    |   |              |              |
| 3056:      | 40         | 13        | 27 | 1 | 41 | 13 | 28 | 0 | 1313.2440000 | 1313.2444092 |
| -0.0004092 | -0.0004000 | 0.0000000 |    |   |    |    |    |   |              |              |
| 3057:      | 39         | 13        | 26 | 1 | 40 | 13 | 27 | 0 | 1313.5033500 | 1313.5035013 |
| -0.0001513 | -0.0004000 | 0.0000000 |    |   |    |    |    |   |              |              |
| 3058:      | 38         | 13        | 25 | 1 | 39 | 13 | 26 | 0 | 1313.7622800 | 1313.7625272 |
| -0.0002472 | -0.0004000 | 0.0000000 |    |   |    |    |    |   |              |              |
| 3059:      | 37         | 13        | 24 | 1 | 38 | 13 | 25 | 0 | 1314.0213100 | 1314.0214855 |
| -0.0001755 | -0.0004000 | 0.0000000 |    |   |    |    |    |   |              |              |
| 3060:      | 34         | 13        | 21 | 1 | 35 | 13 | 22 | 0 | 1314.7976300 | 1314.7979374 |
| -0.0003074 | -0.0004000 | 0.0000000 |    |   |    |    |    |   |              |              |
| 3061:      | 32         | 13        | 19 | 1 | 33 | 13 | 20 | 0 | 1315.3147400 | 1315.3152037 |
| -0.0004637 | -0.0004000 | 0.0000000 |    |   |    |    |    |   |              |              |
| 3062:      | 31         | 13        | 18 | 1 | 32 | 13 | 19 | 0 | 1315.5734900 | 1315.5737215 |
| -0.0002315 | -0.0004000 | 0.0000000 |    |   |    |    |    |   |              |              |
| 3063:      | 29         | 13        | 16 | 1 | 30 | 13 | 17 | 0 | 1316.0905300 | 1316.0905185 |
| 0.0000115  | -0.0004000 | 0.0000000 |    |   |    |    |    |   |              |              |
| 3064:      | 28         | 13        | 15 | 1 | 29 | 13 | 16 | 0 | 1316.3482700 | 1316.3487945 |
| -0.0005245 | -0.0004000 | 0.0000000 |    |   |    |    |    |   |              |              |
| 3065:      | 27         | 13        | 14 | 1 | 28 | 13 | 15 | 0 | 1316.6068900 | 1316.6069867 |
| -0.0000967 | -0.0004000 | 0.0000000 |    |   |    |    |    |   |              |              |
| 3066:      | 25         | 13        | 12 | 1 | 26 | 13 | 13 | 0 | 1317.1234100 | 1317.1231134 |
| 0.0002966  | -0.0004000 | 0.0000000 |    |   |    |    |    |   |              |              |
| 3067:      | 24         | 13        | 11 | 1 | 25 | 13 | 12 | 0 | 1317.3809100 | 1317.3810448 |
| -0.0001348 | -0.0004000 | 0.0000000 |    |   |    |    |    |   |              |              |
| 3068:      | 23         | 13        | 10 | 1 | 24 | 13 | 11 | 0 | 1317.6387600 | 1317.6388861 |
| -0.0001261 | -0.0004000 | 0.0000000 |    |   |    |    |    |   |              |              |
| 3069:      | 22         | 13        | 9  | 1 | 23 | 13 | 10 | 0 | 1317.8967100 | 1317.8966358 |
| 0.0000742  | -0.0004000 | 0.0000000 |    |   |    |    |    |   |              |              |
| 3070:      | 21         | 13        | 8  | 1 | 22 | 13 | 9  | 0 | 1318.1541000 | 1318.1542922 |
| -0.0001922 | -0.0004000 | 0.0000000 |    |   |    |    |    |   |              |              |
| 3071:      | 20         | 13        | 7  | 1 | 21 | 13 | 8  | 0 | 1318.4116600 | 1318.4118539 |
| -0.0001939 | -0.0004000 | 0.0000000 |    |   |    |    |    |   |              |              |
| 3072:      | 19         | 13        | 6  | 1 | 20 | 13 | 7  | 0 | 1318.6694000 | 1318.6693193 |
| 0.0000807  | -0.0004000 | 0.0000000 |    |   |    |    |    |   |              |              |
| 3073:      | 18         | 13        | 5  | 1 | 19 | 13 | 6  | 0 | 1318.9268500 | 1318.9266869 |
| 0.0001631  | -0.0004000 | 0.0000000 |    |   |    |    |    |   |              |              |
| 3074:      | 17         | 13        | 4  | 1 | 18 | 13 | 5  | 0 | 1319.1842800 | 1319.1839551 |
| 0.0003249  | -0.0004000 | 0.0000000 |    |   |    |    |    |   |              |              |
| 3075:      | 15         | 13        | 2  | 1 | 16 | 13 | 3  | 0 | 1319.6983900 | 1319.6981872 |
| 0.0002028  | -0.0004000 | 0.0000000 |    |   |    |    |    |   |              |              |
| 3076:      | 14         | 13        | 1  | 1 | 15 | 13 | 2  | 0 | 1319.9550300 | 1319.9551480 |
| -0.0001180 | -0.0004000 | 0.0000000 |    |   |    |    |    |   |              |              |
| 3077:      | 16         | 13        | 3  | 1 | 15 | 13 | 2  | 0 | 1327.8612300 | 1327.8611956 |
| 0.0000344  | -0.0004000 | 0.0000000 |    |   |    |    |    |   |              |              |
| 3078:      | 17         | 13        | 4  | 1 | 16 | 13 | 3  | 0 | 1328.1141000 | 1328.1140436 |
| 0.0000564  | -0.0004000 | 0.0000000 |    |   |    |    |    |   |              |              |
| 3079:      | 18         | 13        | 5  | 1 | 17 | 13 | 4  | 0 | 1328.3661200 | 1328.3667390 |
| -0.0006190 | -0.0004000 | 0.0000000 |    |   |    |    |    |   |              |              |
| 3080:      | 19         | 13        | 6  | 1 | 18 | 13 | 5  | 0 | 1328.6187300 | 1328.6192803 |
| -0.0005503 | -0.0004000 | 0.0000000 |    |   |    |    |    |   |              |              |
| 3081:      | 20         | 13        | 7  | 1 | 19 | 13 | 6  | 0 | 1328.8710300 | 1328.8716662 |
| -0.0006362 | -0.0004000 | 0.0000000 |    |   |    |    |    |   |              |              |
| 3082:      | 24         | 13        | 11 | 1 | 23 | 13 | 10 | 0 | 1329.8790800 | 1329.8796261 |
| -0.0005461 | -0.0004000 | 0.0000000 |    |   |    |    |    |   |              |              |
| 3083:      | 25         | 13        | 12 | 1 | 24 | 13 | 11 | 0 | 1330.1311500 | 1330.1312130 |
| -0.0000630 | -0.0004000 | 0.0000000 |    |   |    |    |    |   |              |              |
| 3084:      | 26         | 13        | 13 | 1 | 25 | 13 | 12 | 0 | 1330.3822200 | 1330.3826358 |
| -0.0004158 | -0.0004000 | 0.0000000 |    |   |    |    |    |   |              |              |
| 3085:      | 27         | 13        | 14 | 1 | 26 | 13 | 13 | 0 | 1330.6331800 | 1330.6338930 |



|            |            |           |              |              |
|------------|------------|-----------|--------------|--------------|
| -0.0007130 | -0.0004000 | 0.0000000 |              |              |
| 3086:      | 32         | 13        | 19           | 1 31 13 18 0 |
| -0.0007347 | -0.0004000 | 0.0000000 | 1331.8869100 | 1331.8876447 |
| 3087:      | 34         | 13        | 21           | 1 33 13 20 0 |
| -0.0002356 | -0.0004000 | 0.0000000 | 1332.3877000 | 1332.3879356 |
| 3088:      | 35         | 13        | 22           | 1 34 13 21 0 |
| -0.0004860 | -0.0004000 | 0.0000000 | 1332.6373300 | 1332.6378160 |
| 3089:      | 38         | 13        | 25           | 1 37 13 24 0 |
| -0.0003993 | -0.0004000 | 0.0000000 | 1333.3859800 | 1333.3863793 |
| 3090:      | 40         | 13        | 27           | 1 39 13 26 0 |
| -0.0001385 | -0.0004000 | 0.0000000 | 1333.8843700 | 1333.8845085 |
| 3091:      | 41         | 13        | 28           | 1 40 13 27 0 |
| -0.0001348 | -0.0004000 | 0.0000000 | 1334.1331600 | 1334.1332948 |
| 3092:      | 42         | 13        | 29           | 1 41 13 28 0 |
| -0.0001236 | -0.0004000 | 0.0000000 | 1334.3817700 | 1334.3818936 |
| 3093:      | 43         | 13        | 30           | 1 42 13 29 0 |
| 0.0002266  | -0.0004000 | 0.0000000 | 1334.6305300 | 1334.6303034 |
| 3094:      | 44         | 13        | 31           | 1 43 13 30 0 |
| -0.0001727 | -0.0004000 | 0.0000000 | 1334.8783500 | 1334.8785227 |
| 3095:      | 46         | 13        | 33           | 1 45 13 32 0 |
| 0.0005162  | -0.0004000 | 0.0000000 | 1335.3749000 | 1335.3743838 |
| 3096:      | 48         | 13        | 35           | 1 47 13 34 0 |
| 0.0002452  | -0.0004000 | 0.0000000 | 1335.8697100 | 1335.8694648 |
| 3097:      | 49         | 13        | 36           | 1 48 13 35 0 |
| 0.0002110  | -0.0004000 | 0.0000000 | 1336.1169200 | 1336.1167090 |
| 3098:      | 50         | 13        | 37           | 1 49 13 36 0 |
| 0.0000764  | -0.0004000 | 0.0000000 | 1336.3638300 | 1336.3637536 |
| 3099:      | 53         | 13        | 40           | 1 52 13 39 0 |
| -0.0002348 | -0.0004000 | 0.0000000 | 1337.1034400 | 1337.1036748 |
| 3100:      | 54         | 13        | 41           | 1 53 13 40 0 |
| 0.0000842  | -0.0004000 | 0.0000000 | 1337.3499900 | 1337.3499058 |
| 3101:      | 57         | 13        | 44           | 1 56 13 43 0 |
| 0.0003209  | -0.0004000 | 0.0000000 | 1338.0876700 | 1338.0873491 |
| 3102:      | 59         | 13        | 46           | 1 58 13 45 0 |
| 0.0000693  | -0.0004000 | 0.0000000 | 1338.5779900 | 1338.5779207 |
| 3103:      | 60         | 13        | 47           | 1 59 13 46 0 |
| 0.0000654  | -0.0004000 | 0.0000000 | 1338.8229500 | 1338.8228846 |
| 3104:      | 61         | 13        | 48           | 1 60 13 47 0 |
| 0.0002182  | -0.0004000 | 0.0000000 | 1339.0678500 | 1339.0676318 |
| 3105:      | 62         | 13        | 49           | 1 61 13 48 0 |
| 0.0001394  | -0.0004000 | 0.0000000 | 1339.3123000 | 1339.3121606 |
| 3106:      | 63         | 13        | 50           | 1 62 13 49 0 |
| 0.0003505  | -0.0004000 | 0.0000000 | 1339.5568200 | 1339.5564695 |
| 3107:      | 65         | 13        | 52           | 1 64 13 51 0 |
| -0.0004111 | -0.0004000 | 0.0000000 | 1340.0440100 | 1340.0444211 |
| 3108:      | 66         | 13        | 53           | 1 65 13 52 0 |
| 0.0001095  | -0.0004000 | 0.0000000 | 1340.2881700 | 1340.2880605 |
| 3109:      | 68         | 13        | 55           | 1 67 13 54 0 |
| 0.0000418  | -0.0004000 | 0.0000000 | 1340.7747000 | 1340.7746582 |
| 3110:      | 69         | 13        | 56           | 1 68 13 55 0 |
| -0.0000233 | -0.0004000 | 0.0000000 | 1341.0175900 | 1341.0176133 |
| 3111:      | 70         | 13        | 57           | 1 69 13 56 0 |
| -0.0001770 | -0.0004000 | 0.0000000 | 1341.2601600 | 1341.2603370 |
| 3112:      | 71         | 13        | 58           | 1 70 13 57 0 |
| -0.0000375 | -0.0004000 | 0.0000000 | 1341.5027900 | 1341.5028275 |
| 3113:      | 73         | 13        | 60           | 1 72 13 59 0 |
| -0.0005527 | -0.0004000 | 0.0000000 | 1341.9865500 | 1341.9871027 |
| 3114:      | 74         | 13        | 61           | 1 73 13 60 0 |
| -0.0007638 | -0.0004000 | 0.0000000 | 1342.2281200 | 1342.2288838 |
| 3115:      | 75         | 13        | 62           | 1 74 13 61 0 |
| 0.0004649  | -0.0004000 | 0.0000000 | 1342.4708900 | 1342.4704251 |
| 3116:      | 76         | 13        | 63           | 1 75 13 62 0 |
| 0.0003552  | -0.0004000 | 0.0000000 | 1342.7120800 | 1342.7117248 |
| 3117:      | 77         | 13        | 64           | 1 76 13 63 0 |
| -0.0003911 | -0.0004000 | 0.0000000 | 1342.9523900 | 1342.9527811 |

|            |            |           |    |   |    |    |    |   |              |              |
|------------|------------|-----------|----|---|----|----|----|---|--------------|--------------|
| 3118:      | 78         | 13        | 65 | 1 | 77 | 13 | 64 | 0 | 1343.1931000 | 1343.1935924 |
| -0.0004924 | -0.0004000 | 0.0000000 |    |   |    |    |    |   |              |              |
| 3119:      | 81         | 13        | 68 | 1 | 80 | 13 | 67 | 0 | 1343.9147300 | 1343.9145384 |
| 0.0001916  | -0.0004000 | 0.0000000 |    |   |    |    |    |   |              |              |
| 3120:      | 82         | 13        | 69 | 1 | 81 | 13 | 68 | 0 | 1344.1543400 | 1344.1543518 |
| -0.0000118 | -0.0004000 | 0.0000000 |    |   |    |    |    |   |              |              |
| 3121:      | 84         | 13        | 71 | 1 | 83 | 13 | 70 | 0 | 1344.6336400 | 1344.6332153 |
| 0.0004247  | -0.0004000 | 0.0000000 |    |   |    |    |    |   |              |              |
| 3122:      | 86         | 13        | 74 | 1 | 87 | 13 | 75 | 0 | 1301.2834800 | 1301.2836132 |
| -0.0001332 | -0.0004000 | 0.0000000 |    |   |    |    |    |   |              |              |
| 3123:      | 85         | 13        | 73 | 1 | 86 | 13 | 74 | 0 | 1301.5438700 | 1301.5439289 |
| -0.0000589 | -0.0004000 | 0.0000000 |    |   |    |    |    |   |              |              |
| 3124:      | 84         | 13        | 72 | 1 | 85 | 13 | 73 | 0 | 1301.8043600 | 1301.8042566 |
| 0.0001034  | -0.0004000 | 0.0000000 |    |   |    |    |    |   |              |              |
| 3125:      | 82         | 13        | 70 | 1 | 83 | 13 | 71 | 0 | 1302.3254200 | 1302.3249411 |
| 0.0004789  | -0.0004000 | 0.0000000 |    |   |    |    |    |   |              |              |
| 3126:      | 78         | 13        | 66 | 1 | 79 | 13 | 67 | 0 | 1303.3667200 | 1303.3663779 |
| 0.0003421  | -0.0004000 | 0.0000000 |    |   |    |    |    |   |              |              |
| 3127:      | 76         | 13        | 64 | 1 | 77 | 13 | 65 | 0 | 1303.8873000 | 1303.8871025 |
| 0.0001975  | -0.0004000 | 0.0000000 |    |   |    |    |    |   |              |              |
| 3128:      | 75         | 13        | 63 | 1 | 76 | 13 | 64 | 0 | 1304.1473200 | 1304.1474603 |
| -0.0001403 | -0.0004000 | 0.0000000 |    |   |    |    |    |   |              |              |
| 3129:      | 74         | 13        | 62 | 1 | 75 | 13 | 63 | 0 | 1304.4083400 | 1304.4078128 |
| 0.0005272  | -0.0004000 | 0.0000000 |    |   |    |    |    |   |              |              |
| 3130:      | 73         | 13        | 61 | 1 | 74 | 13 | 62 | 0 | 1304.6682700 | 1304.6681583 |
| 0.0001117  | -0.0004000 | 0.0000000 |    |   |    |    |    |   |              |              |
| 3131:      | 71         | 13        | 59 | 1 | 72 | 13 | 60 | 0 | 1305.1897200 | 1305.1888213 |
| 0.0008987  | -0.0004000 | 0.0000000 |    |   |    |    |    |   |              |              |
| 3132:      | 69         | 13        | 57 | 1 | 70 | 13 | 58 | 0 | 1305.7097500 | 1305.7094355 |
| 0.0003145  | -0.0004000 | 0.0000000 |    |   |    |    |    |   |              |              |
| 3133:      | 68         | 13        | 56 | 1 | 69 | 13 | 57 | 0 | 1305.9707500 | 1305.9697199 |
| 0.0010301  | -0.0004000 | 0.0000000 |    |   |    |    |    |   |              |              |
| 3134:      | 67         | 13        | 55 | 1 | 68 | 13 | 56 | 0 | 1306.2306700 | 1306.2299870 |
| 0.0006830  | -0.0004000 | 0.0000000 |    |   |    |    |    |   |              |              |
| 3135:      | 66         | 13        | 54 | 1 | 67 | 13 | 55 | 0 | 1306.4909200 | 1306.4902350 |
| 0.0006850  | -0.0004000 | 0.0000000 |    |   |    |    |    |   |              |              |
| 3136:      | 64         | 13        | 52 | 1 | 65 | 13 | 53 | 0 | 1307.0106800 | 1307.0106669 |
| 0.0000131  | -0.0004000 | 0.0000000 |    |   |    |    |    |   |              |              |
| 3137:      | 63         | 13        | 51 | 1 | 64 | 13 | 52 | 0 | 1307.2708900 | 1307.2708474 |
| 0.0000426  | -0.0004000 | 0.0000000 |    |   |    |    |    |   |              |              |
| 3138:      | 62         | 13        | 50 | 1 | 63 | 13 | 51 | 0 | 1307.5310600 | 1307.5310019 |
| 0.0000581  | -0.0004000 | 0.0000000 |    |   |    |    |    |   |              |              |
| 3139:      | 60         | 13        | 48 | 1 | 61 | 13 | 49 | 0 | 1308.0515000 | 1308.0512263 |
| 0.0002737  | -0.0004000 | 0.0000000 |    |   |    |    |    |   |              |              |
| 3140:      | 58         | 13        | 46 | 1 | 59 | 13 | 47 | 0 | 1308.5710400 | 1308.5713265 |
| -0.0002865 | -0.0004000 | 0.0000000 |    |   |    |    |    |   |              |              |
| 3141:      | 57         | 13        | 45 | 1 | 58 | 13 | 46 | 0 | 1308.8312000 | 1308.8313257 |
| -0.0001257 | -0.0004000 | 0.0000000 |    |   |    |    |    |   |              |              |
| 3142:      | 56         | 13        | 44 | 1 | 57 | 13 | 45 | 0 | 1309.0916900 | 1309.0912888 |
| 0.0004012  | -0.0004000 | 0.0000000 |    |   |    |    |    |   |              |              |
| 3143:      | 54         | 13        | 42 | 1 | 55 | 13 | 43 | 0 | 1309.6114800 | 1309.6110997 |
| 0.0003803  | -0.0004000 | 0.0000000 |    |   |    |    |    |   |              |              |
| 3144:      | 53         | 13        | 41 | 1 | 54 | 13 | 42 | 0 | 1309.8715100 | 1309.8709442 |
| 0.0005658  | -0.0004000 | 0.0000000 |    |   |    |    |    |   |              |              |
| 3145:      | 52         | 13        | 40 | 1 | 53 | 13 | 41 | 0 | 1310.1309800 | 1310.1307457 |
| 0.0002343  | -0.0004000 | 0.0000000 |    |   |    |    |    |   |              |              |
| 3146:      | 51         | 13        | 39 | 1 | 52 | 13 | 40 | 0 | 1310.3912700 | 1310.3905027 |
| 0.0007673  | -0.0004000 | 0.0000000 |    |   |    |    |    |   |              |              |
| 3147:      | 50         | 13        | 38 | 1 | 51 | 13 | 39 | 0 | 1310.6506900 | 1310.6502134 |
| 0.0004766  | -0.0004000 | 0.0000000 |    |   |    |    |    |   |              |              |
| 3148:      | 49         | 13        | 37 | 1 | 50 | 13 | 38 | 0 | 1310.9101400 | 1310.9098762 |
| 0.0002638  | -0.0004000 | 0.0000000 |    |   |    |    |    |   |              |              |
| 3149:      | 47         | 13        | 35 | 1 | 48 | 13 | 36 | 0 | 1311.4293200 | 1311.4290512 |
| 0.0002688  | -0.0004000 | 0.0000000 |    |   |    |    |    |   |              |              |
| 3150:      | 45         | 13        | 33 | 1 | 46 | 13 | 34 | 0 | 1311.9485500 | 1311.9480145 |

|            |            |           |              |              |
|------------|------------|-----------|--------------|--------------|
| 0.0005355  | -0.0004000 | 0.0000000 |              |              |
| 3151: 44   | 13 32 1 45 | 13 33 0   | 1312.2078400 | 1312.2074125 |
| 0.0004275  | -0.0004000 | 0.0000000 |              |              |
| 3152: 40   | 13 28 1 41 | 13 29 0   | 1313.2440000 | 1313.2444092 |
| -0.0004092 | -0.0004000 | 0.0000000 |              |              |
| 3153: 39   | 13 27 1 40 | 13 28 0   | 1313.5033500 | 1313.5035013 |
| -0.0001513 | -0.0004000 | 0.0000000 |              |              |
| 3154: 38   | 13 26 1 39 | 13 27 0   | 1313.7622800 | 1313.7625272 |
| -0.0002472 | -0.0004000 | 0.0000000 |              |              |
| 3155: 37   | 13 25 1 38 | 13 26 0   | 1314.0213100 | 1314.0214855 |
| -0.0001755 | -0.0004000 | 0.0000000 |              |              |
| 3156: 34   | 13 22 1 35 | 13 23 0   | 1314.7976300 | 1314.7979374 |
| -0.0003074 | -0.0004000 | 0.0000000 |              |              |
| 3157: 32   | 13 20 1 33 | 13 21 0   | 1315.3147400 | 1315.3152037 |
| -0.0004637 | -0.0004000 | 0.0000000 |              |              |
| 3158: 31   | 13 19 1 32 | 13 20 0   | 1315.5734900 | 1315.5737215 |
| -0.0002315 | -0.0004000 | 0.0000000 |              |              |
| 3159: 29   | 13 17 1 30 | 13 18 0   | 1316.0905300 | 1316.0905185 |
| 0.0000115  | -0.0004000 | 0.0000000 |              |              |
| 3160: 28   | 13 16 1 29 | 13 17 0   | 1316.3482700 | 1316.3487945 |
| -0.0005245 | -0.0004000 | 0.0000000 |              |              |
| 3161: 27   | 13 15 1 28 | 13 16 0   | 1316.6068900 | 1316.6069867 |
| -0.0000967 | -0.0004000 | 0.0000000 |              |              |
| 3162: 25   | 13 13 1 26 | 13 14 0   | 1317.1234100 | 1317.1231134 |
| 0.0002966  | -0.0004000 | 0.0000000 |              |              |
| 3163: 24   | 13 12 1 25 | 13 13 0   | 1317.3809100 | 1317.3810448 |
| -0.0001348 | -0.0004000 | 0.0000000 |              |              |
| 3164: 23   | 13 11 1 24 | 13 12 0   | 1317.6387600 | 1317.6388861 |
| -0.0001261 | -0.0004000 | 0.0000000 |              |              |
| 3165: 22   | 13 10 1 23 | 13 11 0   | 1317.8967100 | 1317.8966358 |
| 0.0000742  | -0.0004000 | 0.0000000 |              |              |
| 3166: 21   | 13 9 1 22  | 13 10 0   | 1318.1541000 | 1318.1542922 |
| -0.0001922 | -0.0004000 | 0.0000000 |              |              |
| 3167: 20   | 13 8 1 21  | 13 9 0    | 1318.4116600 | 1318.4118539 |
| -0.0001939 | -0.0004000 | 0.0000000 |              |              |
| 3168: 19   | 13 7 1 20  | 13 8 0    | 1318.6694000 | 1318.6693193 |
| 0.0000807  | -0.0004000 | 0.0000000 |              |              |
| 3169: 18   | 13 6 1 19  | 13 7 0    | 1318.9268500 | 1318.9266869 |
| 0.0001631  | -0.0004000 | 0.0000000 |              |              |
| 3170: 17   | 13 5 1 18  | 13 6 0    | 1319.1842800 | 1319.1839551 |
| 0.0003249  | -0.0004000 | 0.0000000 |              |              |
| 3171: 15   | 13 3 1 16  | 13 4 0    | 1319.6983900 | 1319.6981872 |
| 0.0002028  | -0.0004000 | 0.0000000 |              |              |
| 3172: 14   | 13 2 1 15  | 13 3 0    | 1319.9550300 | 1319.9551480 |
| -0.0001180 | -0.0004000 | 0.0000000 |              |              |
| 3173: 16   | 13 4 1 15  | 13 3 0    | 1327.8612300 | 1327.8611956 |
| 0.0000344  | -0.0004000 | 0.0000000 |              |              |
| 3174: 17   | 13 5 1 16  | 13 4 0    | 1328.1141000 | 1328.1140436 |
| 0.0000564  | -0.0004000 | 0.0000000 |              |              |
| 3175: 18   | 13 6 1 17  | 13 5 0    | 1328.3661200 | 1328.3667390 |
| -0.0006190 | -0.0004000 | 0.0000000 |              |              |
| 3176: 19   | 13 7 1 18  | 13 6 0    | 1328.6187300 | 1328.6192803 |
| -0.0005503 | -0.0004000 | 0.0000000 |              |              |
| 3177: 20   | 13 8 1 19  | 13 7 0    | 1328.8710300 | 1328.8716662 |
| -0.0006362 | -0.0004000 | 0.0000000 |              |              |
| 3178: 24   | 13 12 1 23 | 13 11 0   | 1329.8790800 | 1329.8796261 |
| -0.0005461 | -0.0004000 | 0.0000000 |              |              |
| 3179: 25   | 13 13 1 24 | 13 12 0   | 1330.1311500 | 1330.1312130 |
| -0.0000630 | -0.0004000 | 0.0000000 |              |              |
| 3180: 26   | 13 14 1 25 | 13 13 0   | 1330.3822200 | 1330.3826358 |
| -0.0004158 | -0.0004000 | 0.0000000 |              |              |
| 3181: 27   | 13 15 1 26 | 13 14 0   | 1330.6331800 | 1330.6338930 |
| -0.0007130 | -0.0004000 | 0.0000000 |              |              |
| 3182: 32   | 13 20 1 31 | 13 19 0   | 1331.8869100 | 1331.8876447 |
| -0.0007347 | -0.0004000 | 0.0000000 |              |              |

|            |            |           |    |   |    |    |    |   |              |              |
|------------|------------|-----------|----|---|----|----|----|---|--------------|--------------|
| 3183:      | 34         | 13        | 22 | 1 | 33 | 13 | 21 | 0 | 1332.3877000 | 1332.3879356 |
| -0.0002356 | -0.0004000 | 0.0000000 |    |   |    |    |    |   |              |              |
| 3184:      | 35         | 13        | 23 | 1 | 34 | 13 | 22 | 0 | 1332.6373300 | 1332.6378160 |
| -0.0004860 | -0.0004000 | 0.0000000 |    |   |    |    |    |   |              |              |
| 3185:      | 38         | 13        | 26 | 1 | 37 | 13 | 25 | 0 | 1333.3859800 | 1333.3863793 |
| -0.0003993 | -0.0004000 | 0.0000000 |    |   |    |    |    |   |              |              |
| 3186:      | 40         | 13        | 28 | 1 | 39 | 13 | 27 | 0 | 1333.8843700 | 1333.8845085 |
| -0.0001385 | -0.0004000 | 0.0000000 |    |   |    |    |    |   |              |              |
| 3187:      | 41         | 13        | 29 | 1 | 40 | 13 | 28 | 0 | 1334.1331600 | 1334.1332948 |
| -0.0001348 | -0.0004000 | 0.0000000 |    |   |    |    |    |   |              |              |
| 3188:      | 42         | 13        | 30 | 1 | 41 | 13 | 29 | 0 | 1334.3817700 | 1334.3818936 |
| -0.0001236 | -0.0004000 | 0.0000000 |    |   |    |    |    |   |              |              |
| 3189:      | 43         | 13        | 31 | 1 | 42 | 13 | 30 | 0 | 1334.6305300 | 1334.6303034 |
| 0.0002266  | -0.0004000 | 0.0000000 |    |   |    |    |    |   |              |              |
| 3190:      | 44         | 13        | 32 | 1 | 43 | 13 | 31 | 0 | 1334.8783500 | 1334.8785227 |
| -0.0001727 | -0.0004000 | 0.0000000 |    |   |    |    |    |   |              |              |
| 3191:      | 46         | 13        | 34 | 1 | 45 | 13 | 33 | 0 | 1335.3749000 | 1335.3743838 |
| 0.0005162  | -0.0004000 | 0.0000000 |    |   |    |    |    |   |              |              |
| 3192:      | 48         | 13        | 36 | 1 | 47 | 13 | 35 | 0 | 1335.8697100 | 1335.8694648 |
| 0.0002452  | -0.0004000 | 0.0000000 |    |   |    |    |    |   |              |              |
| 3193:      | 49         | 13        | 37 | 1 | 48 | 13 | 36 | 0 | 1336.1169200 | 1336.1167090 |
| 0.0002110  | -0.0004000 | 0.0000000 |    |   |    |    |    |   |              |              |
| 3194:      | 50         | 13        | 38 | 1 | 49 | 13 | 37 | 0 | 1336.3638300 | 1336.3637536 |
| 0.0000764  | -0.0004000 | 0.0000000 |    |   |    |    |    |   |              |              |
| 3195:      | 53         | 13        | 41 | 1 | 52 | 13 | 40 | 0 | 1337.1034400 | 1337.1036748 |
| -0.0002348 | -0.0004000 | 0.0000000 |    |   |    |    |    |   |              |              |
| 3196:      | 54         | 13        | 42 | 1 | 53 | 13 | 41 | 0 | 1337.3499900 | 1337.3499058 |
| 0.0000842  | -0.0004000 | 0.0000000 |    |   |    |    |    |   |              |              |
| 3197:      | 57         | 13        | 45 | 1 | 56 | 13 | 44 | 0 | 1338.0876700 | 1338.0873491 |
| 0.0003209  | -0.0004000 | 0.0000000 |    |   |    |    |    |   |              |              |
| 3198:      | 59         | 13        | 47 | 1 | 58 | 13 | 46 | 0 | 1338.5779900 | 1338.5779207 |
| 0.0000693  | -0.0004000 | 0.0000000 |    |   |    |    |    |   |              |              |
| 3199:      | 60         | 13        | 48 | 1 | 59 | 13 | 47 | 0 | 1338.8229500 | 1338.8228846 |
| 0.0000654  | -0.0004000 | 0.0000000 |    |   |    |    |    |   |              |              |
| 3200:      | 61         | 13        | 49 | 1 | 60 | 13 | 48 | 0 | 1339.0678500 | 1339.0676318 |
| 0.0002182  | -0.0004000 | 0.0000000 |    |   |    |    |    |   |              |              |
| 3201:      | 62         | 13        | 50 | 1 | 61 | 13 | 49 | 0 | 1339.3123000 | 1339.3121606 |
| 0.0001394  | -0.0004000 | 0.0000000 |    |   |    |    |    |   |              |              |
| 3202:      | 63         | 13        | 51 | 1 | 62 | 13 | 50 | 0 | 1339.5568200 | 1339.5564695 |
| 0.0003505  | -0.0004000 | 0.0000000 |    |   |    |    |    |   |              |              |
| 3203:      | 65         | 13        | 53 | 1 | 64 | 13 | 52 | 0 | 1340.0440100 | 1340.0444211 |
| -0.0004111 | -0.0004000 | 0.0000000 |    |   |    |    |    |   |              |              |
| 3204:      | 66         | 13        | 54 | 1 | 65 | 13 | 53 | 0 | 1340.2881700 | 1340.2880605 |
| 0.0001095  | -0.0004000 | 0.0000000 |    |   |    |    |    |   |              |              |
| 3205:      | 68         | 13        | 56 | 1 | 67 | 13 | 55 | 0 | 1340.7747000 | 1340.7746582 |
| 0.0000418  | -0.0004000 | 0.0000000 |    |   |    |    |    |   |              |              |
| 3206:      | 69         | 13        | 57 | 1 | 68 | 13 | 56 | 0 | 1341.0175900 | 1341.0176133 |
| -0.0000233 | -0.0004000 | 0.0000000 |    |   |    |    |    |   |              |              |
| 3207:      | 70         | 13        | 58 | 1 | 69 | 13 | 57 | 0 | 1341.2601600 | 1341.2603370 |
| -0.0001770 | -0.0004000 | 0.0000000 |    |   |    |    |    |   |              |              |
| 3208:      | 71         | 13        | 59 | 1 | 70 | 13 | 58 | 0 | 1341.5027900 | 1341.5028275 |
| -0.0000375 | -0.0004000 | 0.0000000 |    |   |    |    |    |   |              |              |
| 3209:      | 73         | 13        | 61 | 1 | 72 | 13 | 60 | 0 | 1341.9865500 | 1341.9871027 |
| -0.0005527 | -0.0004000 | 0.0000000 |    |   |    |    |    |   |              |              |
| 3210:      | 74         | 13        | 62 | 1 | 73 | 13 | 61 | 0 | 1342.2281200 | 1342.2288838 |
| -0.0007638 | -0.0004000 | 0.0000000 |    |   |    |    |    |   |              |              |
| 3211:      | 75         | 13        | 63 | 1 | 74 | 13 | 62 | 0 | 1342.4708900 | 1342.4704251 |
| 0.0004649  | -0.0004000 | 0.0000000 |    |   |    |    |    |   |              |              |
| 3212:      | 76         | 13        | 64 | 1 | 75 | 13 | 63 | 0 | 1342.7120800 | 1342.7117248 |
| 0.0003552  | -0.0004000 | 0.0000000 |    |   |    |    |    |   |              |              |
| 3213:      | 77         | 13        | 65 | 1 | 76 | 13 | 64 | 0 | 1342.9523900 | 1342.9527811 |
| -0.0003911 | -0.0004000 | 0.0000000 |    |   |    |    |    |   |              |              |
| 3214:      | 78         | 13        | 66 | 1 | 77 | 13 | 65 | 0 | 1343.1931000 | 1343.1935924 |
| -0.0004924 | -0.0004000 | 0.0000000 |    |   |    |    |    |   |              |              |
| 3215:      | 81         | 13        | 69 | 1 | 80 | 13 | 68 | 0 | 1343.9147300 | 1343.9145384 |

|            |            |           |              |              |
|------------|------------|-----------|--------------|--------------|
| 0.0001916  | -0.0004000 | 0.0000000 |              |              |
| 3216:      | 82         | 13 70     | 1 81 13 69   | 0            |
| -0.0000118 | -0.0004000 | 0.0000000 | 1344.1543400 | 1344.1543518 |
| 3217:      | 84         | 13 72     | 1 83 13 71   | 0            |
| 0.0004247  | -0.0004000 | 0.0000000 | 1344.6336400 | 1344.6332153 |
| 3218:      | 80         | 14 66     | 1 81 14 67   | 0            |
| -0.0004584 | -0.0004000 | 0.0000000 | 1302.5639200 | 1302.5643784 |
| 3219:      | 79         | 14 65     | 1 80 14 66   | 0            |
| 0.0001501  | -0.0004000 | 0.0000000 | 1302.8248300 | 1302.8246799 |
| 3220:      | 77         | 14 63     | 1 78 14 64   | 0            |
| -0.0000987 | -0.0004000 | 0.0000000 | 1303.3451900 | 1303.3452887 |
| 3221:      | 76         | 14 62     | 1 77 14 63   | 0            |
| -0.0002526 | -0.0004000 | 0.0000000 | 1303.6053400 | 1303.6055926 |
| 3222:      | 75         | 14 61     | 1 76 14 62   | 0            |
| -0.0008040 | -0.0004000 | 0.0000000 | 1303.8650900 | 1303.8658940 |
| 3223:      | 73         | 14 59     | 1 74 14 60   | 0            |
| -0.0006922 | -0.0004000 | 0.0000000 | 1304.3857900 | 1304.3864822 |
| 3224:      | 70         | 14 56     | 1 71 14 57   | 0            |
| -0.0000634 | -0.0004000 | 0.0000000 | 1305.1672400 | 1305.1673034 |
| 3225:      | 68         | 14 54     | 1 69 14 55   | 0            |
| 0.0002994  | -0.0004000 | 0.0000000 | 1305.6880900 | 1305.6877906 |
| 3226:      | 67         | 14 53     | 1 68 14 54   | 0            |
| 0.0001990  | -0.0004000 | 0.0000000 | 1305.9482100 | 1305.9480110 |
| 3227:      | 66         | 14 52     | 1 67 14 53   | 0            |
| -0.0002838 | -0.0004000 | 0.0000000 | 1306.2079300 | 1306.2082138 |
| 3228:      | 61         | 14 47     | 1 62 14 48   | 0            |
| -0.0004241 | -0.0004000 | 0.0000000 | 1307.5084800 | 1307.5089041 |
| 3229:      | 60         | 14 46     | 1 61 14 47   | 0            |
| -0.0006457 | -0.0004000 | 0.0000000 | 1307.7683200 | 1307.7689657 |
| 3230:      | 59         | 14 45     | 1 60 14 46   | 0            |
| -0.0006279 | -0.0004000 | 0.0000000 | 1308.0283700 | 1308.0289979 |
| 3231:      | 58         | 14 44     | 1 59 14 45   | 0            |
| -0.0002991 | -0.0004000 | 0.0000000 | 1308.2887000 | 1308.2889991 |
| 3232:      | 57         | 14 43     | 1 58 14 44   | 0            |
| -0.0005575 | -0.0004000 | 0.0000000 | 1308.5484100 | 1308.5489675 |
| 3233:      | 56         | 14 42     | 1 57 14 43   | 0            |
| 0.0002584  | -0.0004000 | 0.0000000 | 1308.8091600 | 1308.8089016 |
| 3234:      | 55         | 14 41     | 1 56 14 42   | 0            |
| 0.0001504  | -0.0004000 | 0.0000000 | 1309.0689500 | 1309.0687996 |
| 3235:      | 54         | 14 40     | 1 55 14 41   | 0            |
| -0.0001198 | -0.0004000 | 0.0000000 | 1309.3285400 | 1309.3286598 |
| 3236:      | 53         | 14 39     | 1 54 14 40   | 0            |
| -0.0001407 | -0.0004000 | 0.0000000 | 1309.5883400 | 1309.5884807 |
| 3237:      | 52         | 14 38     | 1 53 14 39   | 0            |
| -0.0004605 | -0.0004000 | 0.0000000 | 1309.8478000 | 1309.8482605 |
| 3238:      | 51         | 14 37     | 1 52 14 38   | 0            |
| 0.0001924  | -0.0004000 | 0.0000000 | 1310.1081900 | 1310.1079976 |
| 3239:      | 49         | 14 35     | 1 50 14 36   | 0            |
| 0.0000531  | -0.0004000 | 0.0000000 | 1310.6273900 | 1310.6273369 |
| 3240:      | 48         | 14 34     | 1 49 14 35   | 0            |
| -0.0000059 | -0.0004000 | 0.0000000 | 1310.8869300 | 1310.8869359 |
| 3241:      | 47         | 14 33     | 1 48 14 34   | 0            |
| -0.0004055 | -0.0004000 | 0.0000000 | 1311.1460800 | 1311.1464855 |
| 3242:      | 46         | 14 32     | 1 47 14 33   | 0            |
| 0.0001159  | -0.0004000 | 0.0000000 | 1311.4061000 | 1311.4059841 |
| 3243:      | 45         | 14 31     | 1 46 14 32   | 0            |
| 0.0003000  | -0.0004000 | 0.0000000 | 1311.6657300 | 1311.6654300 |
| 3244:      | 44         | 14 30     | 1 45 14 31   | 0            |
| -0.0000917 | -0.0004000 | 0.0000000 | 1311.9247300 | 1311.9248217 |
| 3245:      | 42         | 14 28     | 1 43 14 29   | 0            |
| -0.0000355 | -0.0004000 | 0.0000000 | 1312.4434000 | 1312.4434355 |
| 3246:      | 41         | 14 27     | 1 42 14 28   | 0            |
| 0.0002357  | -0.0004000 | 0.0000000 | 1312.7028900 | 1312.7026543 |
| 3247:      | 40         | 14 26     | 1 41 14 27   | 0            |
| 0.0001177  | -0.0004000 | 0.0000000 | 1312.9619300 | 1312.9618123 |

|       |            |            |           |   |    |    |    |   |              |              |
|-------|------------|------------|-----------|---|----|----|----|---|--------------|--------------|
| 3248: | 39         | 14         | 25        | 1 | 40 | 14 | 26 | 0 | 1313.2213300 | 1313.2209078 |
|       | 0.0004222  | -0.0004000 | 0.0000000 |   |    |    |    |   |              |              |
| 3249: | 37         | 14         | 23        | 1 | 38 | 14 | 24 | 0 | 1313.7391600 | 1313.7389047 |
|       | 0.0002553  | -0.0004000 | 0.0000000 |   |    |    |    |   |              |              |
| 3250: | 36         | 14         | 22        | 1 | 37 | 14 | 23 | 0 | 1313.9984100 | 1313.9978029 |
|       | 0.0006071  | -0.0004000 | 0.0000000 |   |    |    |    |   |              |              |
| 3251: | 35         | 14         | 21        | 1 | 36 | 14 | 22 | 0 | 1314.2568300 | 1314.2566320 |
|       | 0.0001980  | -0.0004000 | 0.0000000 |   |    |    |    |   |              |              |
| 3252: | 34         | 14         | 20        | 1 | 35 | 14 | 21 | 0 | 1314.5150200 | 1314.5153904 |
|       | -0.0003704 | -0.0004000 | 0.0000000 |   |    |    |    |   |              |              |
| 3253: | 33         | 14         | 19        | 1 | 34 | 14 | 20 | 0 | 1314.7745300 | 1314.7740766 |
|       | 0.0004534  | -0.0004000 | 0.0000000 |   |    |    |    |   |              |              |
| 3254: | 32         | 14         | 18        | 1 | 33 | 14 | 19 | 0 | 1315.0325200 | 1315.0326889 |
|       | -0.0001689 | -0.0004000 | 0.0000000 |   |    |    |    |   |              |              |
| 3255: | 31         | 14         | 17        | 1 | 32 | 14 | 18 | 0 | 1315.2909000 | 1315.2912257 |
|       | -0.0003257 | -0.0004000 | 0.0000000 |   |    |    |    |   |              |              |
| 3256: | 30         | 14         | 16        | 1 | 31 | 14 | 17 | 0 | 1315.5500400 | 1315.5496853 |
|       | 0.0003547  | -0.0004000 | 0.0000000 |   |    |    |    |   |              |              |
| 3257: | 27         | 14         | 13        | 1 | 28 | 14 | 14 | 0 | 1316.3243000 | 1316.3245854 |
|       | -0.0002854 | -0.0004000 | 0.0000000 |   |    |    |    |   |              |              |
| 3258: | 25         | 14         | 11        | 1 | 26 | 14 | 12 | 0 | 1316.8404900 | 1316.8407704 |
|       | -0.0002804 | -0.0004000 | 0.0000000 |   |    |    |    |   |              |              |
| 3259: | 23         | 14         | 9         | 1 | 24 | 14 | 10 | 0 | 1317.3566200 | 1317.3566083 |
|       | 0.0000117  | -0.0004000 | 0.0000000 |   |    |    |    |   |              |              |
| 3260: | 15         | 14         | 1         | 1 | 14 | 14 | 0  | 0 | 1327.3275800 | 1327.3280968 |
|       | -0.0005168 | -0.0004000 | 0.0000000 |   |    |    |    |   |              |              |
| 3261: | 16         | 14         | 2         | 1 | 15 | 14 | 1  | 0 | 1327.5811100 | 1327.5811573 |
|       | -0.0000473 | -0.0004000 | 0.0000000 |   |    |    |    |   |              |              |
| 3262: | 17         | 14         | 3         | 1 | 16 | 14 | 2  | 0 | 1327.8342300 | 1327.8340658 |
|       | 0.0001642  | -0.0004000 | 0.0000000 |   |    |    |    |   |              |              |
| 3263: | 19         | 14         | 5         | 1 | 18 | 14 | 4  | 0 | 1328.3392200 | 1328.3394210 |
|       | -0.0002010 | -0.0004000 | 0.0000000 |   |    |    |    |   |              |              |
| 3264: | 20         | 14         | 6         | 1 | 19 | 14 | 5  | 0 | 1328.5919600 | 1328.5918646 |
|       | 0.0000954  | -0.0004000 | 0.0000000 |   |    |    |    |   |              |              |
| 3265: | 23         | 14         | 9         | 1 | 22 | 14 | 8  | 0 | 1329.3479100 | 1329.3482410 |
|       | -0.0003310 | -0.0004000 | 0.0000000 |   |    |    |    |   |              |              |
| 3266: | 24         | 14         | 10        | 1 | 23 | 14 | 9  | 0 | 1329.6002400 | 1329.6000432 |
|       | 0.0001968  | -0.0004000 | 0.0000000 |   |    |    |    |   |              |              |
| 3267: | 26         | 14         | 12        | 1 | 25 | 14 | 11 | 0 | 1330.1032500 | 1330.1031534 |
|       | 0.0000966  | -0.0004000 | 0.0000000 |   |    |    |    |   |              |              |
| 3268: | 29         | 14         | 15        | 1 | 28 | 14 | 14 | 0 | 1330.8565700 | 1330.8565601 |
|       | 0.0000099  | -0.0004000 | 0.0000000 |   |    |    |    |   |              |              |
| 3269: | 30         | 14         | 16        | 1 | 29 | 14 | 15 | 0 | 1331.1072600 | 1331.1073539 |
|       | -0.0000939 | -0.0004000 | 0.0000000 |   |    |    |    |   |              |              |
| 3270: | 31         | 14         | 17        | 1 | 30 | 14 | 16 | 0 | 1331.3577600 | 1331.3579742 |
|       | -0.0002142 | -0.0004000 | 0.0000000 |   |    |    |    |   |              |              |
| 3271: | 32         | 14         | 18        | 1 | 31 | 14 | 17 | 0 | 1331.6082800 | 1331.6084194 |
|       | -0.0001394 | -0.0004000 | 0.0000000 |   |    |    |    |   |              |              |
| 3272: | 35         | 14         | 21        | 1 | 34 | 14 | 20 | 0 | 1332.3587500 | 1332.3586891 |
|       | 0.0000609  | -0.0004000 | 0.0000000 |   |    |    |    |   |              |              |
| 3273: | 36         | 14         | 22        | 1 | 35 | 14 | 21 | 0 | 1332.6085700 | 1332.6084185 |
|       | 0.0001515  | -0.0004000 | 0.0000000 |   |    |    |    |   |              |              |
| 3274: | 37         | 14         | 23        | 1 | 36 | 14 | 22 | 0 | 1332.8573900 | 1332.8579650 |
|       | -0.0005750 | -0.0004000 | 0.0000000 |   |    |    |    |   |              |              |
| 3275: | 38         | 14         | 24        | 1 | 37 | 14 | 23 | 0 | 1333.1069900 | 1333.1073270 |
|       | -0.0003370 | -0.0004000 | 0.0000000 |   |    |    |    |   |              |              |
| 3276: | 40         | 14         | 26        | 1 | 39 | 14 | 25 | 0 | 1333.6053500 | 1333.6054913 |
|       | -0.0001413 | -0.0004000 | 0.0000000 |   |    |    |    |   |              |              |
| 3277: | 42         | 14         | 28        | 1 | 41 | 14 | 27 | 0 | 1334.1027400 | 1334.1028987 |
|       | -0.0001587 | -0.0004000 | 0.0000000 |   |    |    |    |   |              |              |
| 3278: | 43         | 14         | 29        | 1 | 42 | 14 | 28 | 0 | 1334.3507900 | 1334.3513146 |
|       | -0.0005246 | -0.0004000 | 0.0000000 |   |    |    |    |   |              |              |
| 3279: | 44         | 14         | 30        | 1 | 43 | 14 | 29 | 0 | 1334.5994900 | 1334.5995364 |
|       | -0.0000464 | -0.0004000 | 0.0000000 |   |    |    |    |   |              |              |
| 3280: | 45         | 14         | 31        | 1 | 44 | 14 | 30 | 0 | 1334.8473200 | 1334.8475626 |

|            |            |            |   |                           |
|------------|------------|------------|---|---------------------------|
| -0.0002426 | -0.0004000 | 0.0000000  |   |                           |
| 3281: 46   | 14 32      | 1 45 14 31 | 0 | 1335.0953200 1335.0953916 |
| -0.0000716 | -0.0004000 | 0.0000000  |   |                           |
| 3282: 47   | 14 33      | 1 46 14 32 | 0 | 1335.3424500 1335.3430216 |
| -0.0005716 | -0.0004000 | 0.0000000  |   |                           |
| 3283: 49   | 14 35      | 1 48 14 34 | 0 | 1335.8376500 1335.8376786 |
| -0.0000286 | -0.0004000 | 0.0000000  |   |                           |
| 3284: 51   | 14 37      | 1 50 14 36 | 0 | 1336.3316200 1336.3315205 |
| 0.0000995  | -0.0004000 | 0.0000000  |   |                           |
| 3285: 53   | 14 39      | 1 52 14 38 | 0 | 1336.8244400 1336.8245341 |
| -0.0000941 | -0.0004000 | 0.0000000  |   |                           |
| 3286: 54   | 14 40      | 1 53 14 39 | 0 | 1337.0709400 1337.0707262 |
| 0.0002138  | -0.0004000 | 0.0000000  |   |                           |
| 3287: 55   | 14 41      | 1 54 14 40 | 0 | 1337.3172100 1337.3167062 |
| 0.0005038  | -0.0004000 | 0.0000000  |   |                           |
| 3288: 56   | 14 42      | 1 55 14 41 | 0 | 1337.5629600 1337.5624724 |
| 0.0004876  | -0.0004000 | 0.0000000  |   |                           |
| 3289: 58   | 14 44      | 1 57 14 43 | 0 | 1338.0533300 1338.0533570 |
| -0.0000270 | -0.0004000 | 0.0000000  |   |                           |
| 3290: 59   | 14 45      | 1 58 14 44 | 0 | 1338.2988100 1338.2984719 |
| 0.0003381  | -0.0004000 | 0.0000000  |   |                           |
| 3291: 63   | 14 49      | 1 62 14 48 | 0 | 1339.2767100 1339.2767092 |
| 0.0000008  | -0.0004000 | 0.0000000  |   |                           |
| 3292: 65   | 14 51      | 1 64 14 50 | 0 | 1339.7642800 1339.7644702 |
| -0.0001902 | -0.0004000 | 0.0000000  |   |                           |
| 3293: 66   | 14 52      | 1 65 14 51 | 0 | 1340.0083800 1340.0080052 |
| 0.0003748  | -0.0004000 | 0.0000000  |   |                           |
| 3294: 67   | 14 53      | 1 66 14 52 | 0 | 1340.2517700 1340.2513074 |
| 0.0004626  | -0.0004000 | 0.0000000  |   |                           |
| 3295: 68   | 14 54      | 1 67 14 53 | 0 | 1340.4945700 1340.4943752 |
| 0.0001948  | -0.0004000 | 0.0000000  |   |                           |
| 3296: 69   | 14 55      | 1 68 14 54 | 0 | 1340.7370400 1340.7372068 |
| -0.0001668 | -0.0004000 | 0.0000000  |   |                           |
| 3297: 70   | 14 56      | 1 69 14 55 | 0 | 1340.9797700 1340.9798003 |
| -0.0000303 | -0.0004000 | 0.0000000  |   |                           |
| 3298: 72   | 14 58      | 1 71 14 57 | 0 | 1341.4643200 1341.4642660 |
| 0.0000540  | -0.0004000 | 0.0000000  |   |                           |
| 3299: 74   | 14 60      | 1 73 14 59 | 0 | 1341.9477800 1341.9477577 |
| 0.0000223  | -0.0004000 | 0.0000000  |   |                           |
| 3300: 75   | 14 61      | 1 74 14 60 | 0 | 1342.1891600 1342.1891338 |
| 0.0000262  | -0.0004000 | 0.0000000  |   |                           |
| 3301: 76   | 14 62      | 1 75 14 61 | 0 | 1342.4301800 1342.4302608 |
| -0.0000808 | -0.0004000 | 0.0000000  |   |                           |
| 3302: 77   | 14 63      | 1 76 14 62 | 0 | 1342.6711200 1342.6711370 |
| -0.0000170 | -0.0004000 | 0.0000000  |   |                           |
| 3303: 78   | 14 64      | 1 77 14 63 | 0 | 1342.9122700 1342.9117605 |
| 0.0005095  | -0.0004000 | 0.0000000  |   |                           |
| 3304: 79   | 14 65      | 1 78 14 64 | 0 | 1343.1520600 1343.1521293 |
| -0.0000693 | -0.0004000 | 0.0000000  |   |                           |
| 3305: 80   | 14 66      | 1 79 14 65 | 0 | 1343.3923000 1343.3922417 |
| 0.0000583  | -0.0004000 | 0.0000000  |   |                           |
| 3306: 80   | 14 67      | 1 81 14 68 | 0 | 1302.5639200 1302.5643784 |
| -0.0004584 | -0.0004000 | 0.0000000  |   |                           |
| 3307: 79   | 14 66      | 1 80 14 67 | 0 | 1302.8248300 1302.8246799 |
| 0.0001501  | -0.0004000 | 0.0000000  |   |                           |
| 3308: 77   | 14 64      | 1 78 14 65 | 0 | 1303.3451900 1303.3452887 |
| -0.0000987 | -0.0004000 | 0.0000000  |   |                           |
| 3309: 76   | 14 63      | 1 77 14 64 | 0 | 1303.6053400 1303.6055926 |
| -0.0002526 | -0.0004000 | 0.0000000  |   |                           |
| 3310: 75   | 14 62      | 1 76 14 63 | 0 | 1303.8650900 1303.8658940 |
| -0.0008040 | -0.0004000 | 0.0000000  |   |                           |
| 3311: 73   | 14 60      | 1 74 14 61 | 0 | 1304.3857900 1304.3864822 |
| -0.0006922 | -0.0004000 | 0.0000000  |   |                           |
| 3312: 70   | 14 57      | 1 71 14 58 | 0 | 1305.1672400 1305.1673034 |
| -0.0000634 | -0.0004000 | 0.0000000  |   |                           |

|            |            |           |    |   |    |    |    |   |              |              |
|------------|------------|-----------|----|---|----|----|----|---|--------------|--------------|
| 3313:      | 68         | 14        | 55 | 1 | 69 | 14 | 56 | 0 | 1305.6880900 | 1305.6877906 |
| 0.0002994  | -0.0004000 | 0.0000000 |    |   |    |    |    |   |              |              |
| 3314:      | 67         | 14        | 54 | 1 | 68 | 14 | 55 | 0 | 1305.9482100 | 1305.9480110 |
| 0.0001990  | -0.0004000 | 0.0000000 |    |   |    |    |    |   |              |              |
| 3315:      | 66         | 14        | 53 | 1 | 67 | 14 | 54 | 0 | 1306.2079300 | 1306.2082138 |
| -0.0002838 | -0.0004000 | 0.0000000 |    |   |    |    |    |   |              |              |
| 3316:      | 61         | 14        | 48 | 1 | 62 | 14 | 49 | 0 | 1307.5084800 | 1307.5089041 |
| -0.0004241 | -0.0004000 | 0.0000000 |    |   |    |    |    |   |              |              |
| 3317:      | 60         | 14        | 47 | 1 | 61 | 14 | 48 | 0 | 1307.7683200 | 1307.7689657 |
| -0.0006457 | -0.0004000 | 0.0000000 |    |   |    |    |    |   |              |              |
| 3318:      | 59         | 14        | 46 | 1 | 60 | 14 | 47 | 0 | 1308.0283700 | 1308.0289979 |
| -0.0006279 | -0.0004000 | 0.0000000 |    |   |    |    |    |   |              |              |
| 3319:      | 58         | 14        | 45 | 1 | 59 | 14 | 46 | 0 | 1308.2887000 | 1308.2889991 |
| -0.0002991 | -0.0004000 | 0.0000000 |    |   |    |    |    |   |              |              |
| 3320:      | 57         | 14        | 44 | 1 | 58 | 14 | 45 | 0 | 1308.5484100 | 1308.5489675 |
| -0.0005575 | -0.0004000 | 0.0000000 |    |   |    |    |    |   |              |              |
| 3321:      | 56         | 14        | 43 | 1 | 57 | 14 | 44 | 0 | 1308.8091600 | 1308.8089016 |
| 0.0002584  | -0.0004000 | 0.0000000 |    |   |    |    |    |   |              |              |
| 3322:      | 55         | 14        | 42 | 1 | 56 | 14 | 43 | 0 | 1309.0689500 | 1309.0687996 |
| 0.0001504  | -0.0004000 | 0.0000000 |    |   |    |    |    |   |              |              |
| 3323:      | 54         | 14        | 41 | 1 | 55 | 14 | 42 | 0 | 1309.3285400 | 1309.3286598 |
| -0.0001198 | -0.0004000 | 0.0000000 |    |   |    |    |    |   |              |              |
| 3324:      | 53         | 14        | 40 | 1 | 54 | 14 | 41 | 0 | 1309.5883400 | 1309.5884807 |
| -0.0001407 | -0.0004000 | 0.0000000 |    |   |    |    |    |   |              |              |
| 3325:      | 52         | 14        | 39 | 1 | 53 | 14 | 40 | 0 | 1309.8478000 | 1309.8482605 |
| -0.0004605 | -0.0004000 | 0.0000000 |    |   |    |    |    |   |              |              |
| 3326:      | 51         | 14        | 38 | 1 | 52 | 14 | 39 | 0 | 1310.1081900 | 1310.1079976 |
| 0.0001924  | -0.0004000 | 0.0000000 |    |   |    |    |    |   |              |              |
| 3327:      | 49         | 14        | 36 | 1 | 50 | 14 | 37 | 0 | 1310.6273900 | 1310.6273369 |
| 0.0000531  | -0.0004000 | 0.0000000 |    |   |    |    |    |   |              |              |
| 3328:      | 48         | 14        | 35 | 1 | 49 | 14 | 36 | 0 | 1310.8869300 | 1310.8869359 |
| -0.0000059 | -0.0004000 | 0.0000000 |    |   |    |    |    |   |              |              |
| 3329:      | 47         | 14        | 34 | 1 | 48 | 14 | 35 | 0 | 1311.1460800 | 1311.1464855 |
| -0.0004055 | -0.0004000 | 0.0000000 |    |   |    |    |    |   |              |              |
| 3330:      | 46         | 14        | 33 | 1 | 47 | 14 | 34 | 0 | 1311.4061000 | 1311.4059841 |
| 0.0001159  | -0.0004000 | 0.0000000 |    |   |    |    |    |   |              |              |
| 3331:      | 45         | 14        | 32 | 1 | 46 | 14 | 33 | 0 | 1311.6657300 | 1311.6654300 |
| 0.0003000  | -0.0004000 | 0.0000000 |    |   |    |    |    |   |              |              |
| 3332:      | 44         | 14        | 31 | 1 | 45 | 14 | 32 | 0 | 1311.9247300 | 1311.9248217 |
| -0.0000917 | -0.0004000 | 0.0000000 |    |   |    |    |    |   |              |              |
| 3333:      | 42         | 14        | 29 | 1 | 43 | 14 | 30 | 0 | 1312.4434000 | 1312.4434355 |
| -0.0000355 | -0.0004000 | 0.0000000 |    |   |    |    |    |   |              |              |
| 3334:      | 41         | 14        | 28 | 1 | 42 | 14 | 29 | 0 | 1312.7028900 | 1312.7026543 |
| 0.0002357  | -0.0004000 | 0.0000000 |    |   |    |    |    |   |              |              |
| 3335:      | 40         | 14        | 27 | 1 | 41 | 14 | 28 | 0 | 1312.9619300 | 1312.9618123 |
| 0.0001177  | -0.0004000 | 0.0000000 |    |   |    |    |    |   |              |              |
| 3336:      | 39         | 14        | 26 | 1 | 40 | 14 | 27 | 0 | 1313.2213300 | 1313.2209078 |
| 0.0004222  | -0.0004000 | 0.0000000 |    |   |    |    |    |   |              |              |
| 3337:      | 37         | 14        | 24 | 1 | 38 | 14 | 25 | 0 | 1313.7391600 | 1313.7389047 |
| 0.0002553  | -0.0004000 | 0.0000000 |    |   |    |    |    |   |              |              |
| 3338:      | 36         | 14        | 23 | 1 | 37 | 14 | 24 | 0 | 1313.9984100 | 1313.9978029 |
| 0.0006071  | -0.0004000 | 0.0000000 |    |   |    |    |    |   |              |              |
| 3339:      | 35         | 14        | 22 | 1 | 36 | 14 | 23 | 0 | 1314.2568300 | 1314.2566320 |
| 0.0001980  | -0.0004000 | 0.0000000 |    |   |    |    |    |   |              |              |
| 3340:      | 34         | 14        | 21 | 1 | 35 | 14 | 22 | 0 | 1314.5150200 | 1314.5153904 |
| -0.0003704 | -0.0004000 | 0.0000000 |    |   |    |    |    |   |              |              |
| 3341:      | 33         | 14        | 20 | 1 | 34 | 14 | 21 | 0 | 1314.7745300 | 1314.7740766 |
| 0.0004534  | -0.0004000 | 0.0000000 |    |   |    |    |    |   |              |              |
| 3342:      | 32         | 14        | 19 | 1 | 33 | 14 | 20 | 0 | 1315.0325200 | 1315.0326889 |
| -0.0001689 | -0.0004000 | 0.0000000 |    |   |    |    |    |   |              |              |
| 3343:      | 31         | 14        | 18 | 1 | 32 | 14 | 19 | 0 | 1315.2909000 | 1315.2912257 |
| -0.0003257 | -0.0004000 | 0.0000000 |    |   |    |    |    |   |              |              |
| 3344:      | 30         | 14        | 17 | 1 | 31 | 14 | 18 | 0 | 1315.5500400 | 1315.5496853 |
| 0.0003547  | -0.0004000 | 0.0000000 |    |   |    |    |    |   |              |              |
| 3345:      | 27         | 14        | 14 | 1 | 28 | 14 | 15 | 0 | 1316.3243000 | 1316.3245854 |



|              |            |           |    |              |
|--------------|------------|-----------|----|--------------|
| -0.0002854   | -0.0004000 | 0.0000000 |    |              |
| 3346:        | 25         | 14        | 12 | 1 26 14 13 0 |
|              |            |           |    | 1316.8404900 |
| 1316.8407704 |            |           |    |              |
| -0.0002804   | -0.0004000 | 0.0000000 |    |              |
| 3347:        | 23         | 14        | 10 | 1 24 14 11 0 |
|              |            |           |    | 1317.3566200 |
| 1317.3566083 |            |           |    |              |
| 0.0000117    | -0.0004000 | 0.0000000 |    |              |
| 3348:        | 15         | 14        | 2  | 1 14 14 1 0  |
|              |            |           |    | 1327.3275800 |
| 1327.3280968 |            |           |    |              |
| -0.0005168   | -0.0004000 | 0.0000000 |    |              |
| 3349:        | 16         | 14        | 3  | 1 15 14 2 0  |
|              |            |           |    | 1327.5811100 |
| 1327.5811573 |            |           |    |              |
| -0.0000473   | -0.0004000 | 0.0000000 |    |              |
| 3350:        | 17         | 14        | 4  | 1 16 14 3 0  |
|              |            |           |    | 1327.8342300 |
| 1327.8340658 |            |           |    |              |
| 0.0001642    | -0.0004000 | 0.0000000 |    |              |
| 3351:        | 19         | 14        | 6  | 1 18 14 5 0  |
|              |            |           |    | 1328.3392200 |
| 1328.3394210 |            |           |    |              |
| -0.0002010   | -0.0004000 | 0.0000000 |    |              |
| 3352:        | 20         | 14        | 7  | 1 19 14 6 0  |
|              |            |           |    | 1328.5919600 |
| 1328.5918646 |            |           |    |              |
| 0.0000954    | -0.0004000 | 0.0000000 |    |              |
| 3353:        | 23         | 14        | 10 | 1 22 14 9 0  |
|              |            |           |    | 1329.3479100 |
| 1329.3482410 |            |           |    |              |
| -0.0003310   | -0.0004000 | 0.0000000 |    |              |
| 3354:        | 24         | 14        | 11 | 1 23 14 10 0 |
|              |            |           |    | 1329.6002400 |
| 1329.6000432 |            |           |    |              |
| 0.0001968    | -0.0004000 | 0.0000000 |    |              |
| 3355:        | 26         | 14        | 13 | 1 25 14 12 0 |
|              |            |           |    | 1330.1032500 |
| 1330.1031534 |            |           |    |              |
| 0.0000966    | -0.0004000 | 0.0000000 |    |              |
| 3356:        | 29         | 14        | 16 | 1 28 14 15 0 |
|              |            |           |    | 1330.8565700 |
| 1330.8565601 |            |           |    |              |
| 0.0000099    | -0.0004000 | 0.0000000 |    |              |
| 3357:        | 30         | 14        | 17 | 1 29 14 16 0 |
|              |            |           |    | 1331.1072600 |
| 1331.1073539 |            |           |    |              |
| -0.0000939   | -0.0004000 | 0.0000000 |    |              |
| 3358:        | 31         | 14        | 18 | 1 30 14 17 0 |
|              |            |           |    | 1331.3577600 |
| 1331.3579742 |            |           |    |              |
| -0.0002142   | -0.0004000 | 0.0000000 |    |              |
| 3359:        | 32         | 14        | 19 | 1 31 14 18 0 |
|              |            |           |    | 1331.6082800 |
| 1331.6084194 |            |           |    |              |
| -0.0001394   | -0.0004000 | 0.0000000 |    |              |
| 3360:        | 35         | 14        | 22 | 1 34 14 21 0 |
|              |            |           |    | 1332.3587500 |
| 1332.3586891 |            |           |    |              |
| 0.0000609    | -0.0004000 | 0.0000000 |    |              |
| 3361:        | 36         | 14        | 23 | 1 35 14 22 0 |
|              |            |           |    | 1332.6085700 |
| 1332.6084185 |            |           |    |              |
| 0.0001515    | -0.0004000 | 0.0000000 |    |              |
| 3362:        | 37         | 14        | 24 | 1 36 14 23 0 |
|              |            |           |    | 1332.8573900 |
| 1332.8579650 |            |           |    |              |
| -0.0005750   | -0.0004000 | 0.0000000 |    |              |
| 3363:        | 38         | 14        | 25 | 1 37 14 24 0 |
|              |            |           |    | 1333.1069900 |
| 1333.1073270 |            |           |    |              |
| -0.0003370   | -0.0004000 | 0.0000000 |    |              |
| 3364:        | 40         | 14        | 27 | 1 39 14 26 0 |
|              |            |           |    | 1333.6053500 |
| 1333.6054913 |            |           |    |              |
| -0.0001413   | -0.0004000 | 0.0000000 |    |              |
| 3365:        | 42         | 14        | 29 | 1 41 14 28 0 |
|              |            |           |    | 1334.1027400 |
| 1334.1028987 |            |           |    |              |
| -0.0001587   | -0.0004000 | 0.0000000 |    |              |
| 3366:        | 43         | 14        | 30 | 1 42 14 29 0 |
|              |            |           |    | 1334.3507900 |
| 1334.3513146 |            |           |    |              |
| -0.0005246   | -0.0004000 | 0.0000000 |    |              |
| 3367:        | 44         | 14        | 31 | 1 43 14 30 0 |
|              |            |           |    | 1334.5994900 |
| 1334.5995364 |            |           |    |              |
| -0.0000464   | -0.0004000 | 0.0000000 |    |              |
| 3368:        | 45         | 14        | 32 | 1 44 14 31 0 |
|              |            |           |    | 1334.8473200 |
| 1334.8475626 |            |           |    |              |
| -0.0002426   | -0.0004000 | 0.0000000 |    |              |
| 3369:        | 46         | 14        | 33 | 1 45 14 32 0 |
|              |            |           |    | 1335.0953200 |
| 1335.0953916 |            |           |    |              |
| -0.0000716   | -0.0004000 | 0.0000000 |    |              |
| 3370:        | 47         | 14        | 34 | 1 46 14 33 0 |
|              |            |           |    | 1335.3424500 |
| 1335.3430216 |            |           |    |              |
| -0.0005716   | -0.0004000 | 0.0000000 |    |              |
| 3371:        | 49         | 14        | 36 | 1 48 14 35 0 |
|              |            |           |    | 1335.8376500 |
| 1335.8376786 |            |           |    |              |
| -0.0000286   | -0.0004000 | 0.0000000 |    |              |
| 3372:        | 51         | 14        | 38 | 1 50 14 37 0 |
|              |            |           |    | 1336.3316200 |
| 1336.3315205 |            |           |    |              |
| 0.0000995    | -0.0004000 | 0.0000000 |    |              |
| 3373:        | 53         | 14        | 40 | 1 52 14 39 0 |
|              |            |           |    | 1336.8244400 |
| 1336.8245341 |            |           |    |              |
| -0.0000941   | -0.0004000 | 0.0000000 |    |              |
| 3374:        | 54         | 14        | 41 | 1 53 14 40 0 |
|              |            |           |    | 1337.0709400 |
| 1337.0707262 |            |           |    |              |
| 0.0002138    | -0.0004000 | 0.0000000 |    |              |
| 3375:        | 55         | 14        | 42 | 1 54 14 41 0 |
|              |            |           |    | 1337.3172100 |
| 1337.3167062 |            |           |    |              |
| 0.0005038    | -0.0004000 | 0.0000000 |    |              |
| 3376:        | 56         | 14        | 43 | 1 55 14 42 0 |
|              |            |           |    | 1337.5629600 |
| 1337.5624724 |            |           |    |              |
| 0.0004876    | -0.0004000 | 0.0000000 |    |              |
| 3377:        | 58         | 14        | 45 | 1 57 14 44 0 |
|              |            |           |    | 1338.0533300 |
| 1338.0533570 |            |           |    |              |
| -0.0000270   | -0.0004000 | 0.0000000 |    |              |

|       |            |            |           |   |    |    |    |   |              |              |
|-------|------------|------------|-----------|---|----|----|----|---|--------------|--------------|
| 3378: | 59         | 14         | 46        | 1 | 58 | 14 | 45 | 0 | 1338.2988100 | 1338.2984719 |
|       | 0.0003381  | -0.0004000 | 0.0000000 |   |    |    |    |   |              |              |
| 3379: | 63         | 14         | 50        | 1 | 62 | 14 | 49 | 0 | 1339.2767100 | 1339.2767092 |
|       | 0.0000008  | -0.0004000 | 0.0000000 |   |    |    |    |   |              |              |
| 3380: | 65         | 14         | 52        | 1 | 64 | 14 | 51 | 0 | 1339.7642800 | 1339.7644702 |
|       | -0.0001902 | -0.0004000 | 0.0000000 |   |    |    |    |   |              |              |
| 3381: | 66         | 14         | 53        | 1 | 65 | 14 | 52 | 0 | 1340.0083800 | 1340.0080052 |
|       | 0.0003748  | -0.0004000 | 0.0000000 |   |    |    |    |   |              |              |
| 3382: | 67         | 14         | 54        | 1 | 66 | 14 | 53 | 0 | 1340.2517700 | 1340.2513074 |
|       | 0.0004626  | -0.0004000 | 0.0000000 |   |    |    |    |   |              |              |
| 3383: | 68         | 14         | 55        | 1 | 67 | 14 | 54 | 0 | 1340.4945700 | 1340.4943752 |
|       | 0.0001948  | -0.0004000 | 0.0000000 |   |    |    |    |   |              |              |
| 3384: | 69         | 14         | 56        | 1 | 68 | 14 | 55 | 0 | 1340.7370400 | 1340.7372068 |
|       | -0.0001668 | -0.0004000 | 0.0000000 |   |    |    |    |   |              |              |
| 3385: | 70         | 14         | 57        | 1 | 69 | 14 | 56 | 0 | 1340.9797700 | 1340.9798003 |
|       | -0.0000303 | -0.0004000 | 0.0000000 |   |    |    |    |   |              |              |
| 3386: | 72         | 14         | 59        | 1 | 71 | 14 | 58 | 0 | 1341.4643200 | 1341.4642660 |
|       | 0.0000540  | -0.0004000 | 0.0000000 |   |    |    |    |   |              |              |
| 3387: | 74         | 14         | 61        | 1 | 73 | 14 | 60 | 0 | 1341.9477800 | 1341.9477577 |
|       | 0.0000223  | -0.0004000 | 0.0000000 |   |    |    |    |   |              |              |
| 3388: | 75         | 14         | 62        | 1 | 74 | 14 | 61 | 0 | 1342.1891600 | 1342.1891338 |
|       | 0.0000262  | -0.0004000 | 0.0000000 |   |    |    |    |   |              |              |
| 3389: | 76         | 14         | 63        | 1 | 75 | 14 | 62 | 0 | 1342.4301800 | 1342.4302608 |
|       | -0.0000808 | -0.0004000 | 0.0000000 |   |    |    |    |   |              |              |
| 3390: | 77         | 14         | 64        | 1 | 76 | 14 | 63 | 0 | 1342.6711200 | 1342.6711370 |
|       | -0.0000170 | -0.0004000 | 0.0000000 |   |    |    |    |   |              |              |
| 3391: | 78         | 14         | 65        | 1 | 77 | 14 | 64 | 0 | 1342.9122700 | 1342.9117605 |
|       | 0.0005095  | -0.0004000 | 0.0000000 |   |    |    |    |   |              |              |
| 3392: | 79         | 14         | 66        | 1 | 78 | 14 | 65 | 0 | 1343.1520600 | 1343.1521293 |
|       | -0.0000693 | -0.0004000 | 0.0000000 |   |    |    |    |   |              |              |
| 3393: | 80         | 14         | 67        | 1 | 79 | 14 | 66 | 0 | 1343.3923000 | 1343.3922417 |
|       | 0.0000583  | -0.0004000 | 0.0000000 |   |    |    |    |   |              |              |
| 3394: | 81         | 15         | 66        | 1 | 82 | 15 | 67 | 0 | 1302.0020800 | 1302.0020288 |
|       | 0.0000512  | -0.0004000 | 0.0000000 |   |    |    |    |   |              |              |
| 3395: | 80         | 15         | 65        | 1 | 81 | 15 | 66 | 0 | 1302.2625900 | 1302.2622834 |
|       | 0.0003066  | -0.0004000 | 0.0000000 |   |    |    |    |   |              |              |
| 3396: | 76         | 15         | 61        | 1 | 77 | 15 | 62 | 0 | 1303.3037900 | 1303.3033339 |
|       | 0.0004561  | -0.0004000 | 0.0000000 |   |    |    |    |   |              |              |
| 3397: | 75         | 15         | 60        | 1 | 76 | 15 | 61 | 0 | 1303.5641900 | 1303.5635964 |
|       | 0.0005936  | -0.0004000 | 0.0000000 |   |    |    |    |   |              |              |
| 3398: | 73         | 15         | 58        | 1 | 74 | 15 | 59 | 0 | 1304.0844700 | 1304.0841099 |
|       | 0.0003601  | -0.0004000 | 0.0000000 |   |    |    |    |   |              |              |
| 3399: | 72         | 15         | 57        | 1 | 73 | 15 | 58 | 0 | 1304.3448300 | 1304.3443576 |
|       | 0.0004724  | -0.0004000 | 0.0000000 |   |    |    |    |   |              |              |
| 3400: | 70         | 15         | 55        | 1 | 71 | 15 | 56 | 0 | 1304.8645600 | 1304.8648267 |
|       | -0.0002667 | -0.0004000 | 0.0000000 |   |    |    |    |   |              |              |
| 3401: | 69         | 15         | 54        | 1 | 70 | 15 | 55 | 0 | 1305.1250200 | 1305.1250448 |
|       | -0.0000248 | -0.0004000 | 0.0000000 |   |    |    |    |   |              |              |
| 3402: | 68         | 15         | 53        | 1 | 69 | 15 | 54 | 0 | 1305.3853800 | 1305.3852498 |
|       | 0.0001302  | -0.0004000 | 0.0000000 |   |    |    |    |   |              |              |
| 3403: | 67         | 15         | 52        | 1 | 68 | 15 | 53 | 0 | 1305.6453700 | 1305.6454400 |
|       | -0.0000700 | -0.0004000 | 0.0000000 |   |    |    |    |   |              |              |
| 3404: | 66         | 15         | 51        | 1 | 67 | 15 | 52 | 0 | 1305.9053400 | 1305.9056138 |
|       | -0.0002738 | -0.0004000 | 0.0000000 |   |    |    |    |   |              |              |
| 3405: | 65         | 15         | 50        | 1 | 66 | 15 | 51 | 0 | 1306.1657200 | 1306.1657695 |
|       | -0.0000495 | -0.0004000 | 0.0000000 |   |    |    |    |   |              |              |
| 3406: | 64         | 15         | 49        | 1 | 65 | 15 | 50 | 0 | 1306.4257400 | 1306.4259056 |
|       | -0.0001656 | -0.0004000 | 0.0000000 |   |    |    |    |   |              |              |
| 3407: | 61         | 15         | 46        | 1 | 62 | 15 | 47 | 0 | 1307.2059100 | 1307.2061790 |
|       | -0.0002690 | -0.0004000 | 0.0000000 |   |    |    |    |   |              |              |
| 3408: | 60         | 15         | 45        | 1 | 61 | 15 | 46 | 0 | 1307.4657800 | 1307.4662197 |
|       | -0.0004397 | -0.0004000 | 0.0000000 |   |    |    |    |   |              |              |
| 3409: | 57         | 15         | 42        | 1 | 58 | 15 | 43 | 0 | 1308.2460400 | 1308.2461678 |
|       | -0.0001278 | -0.0004000 | 0.0000000 |   |    |    |    |   |              |              |
| 3410: | 56         | 15         | 41        | 1 | 57 | 15 | 42 | 0 | 1308.5061800 | 1308.5060869 |

|            |            |            |   |                           |
|------------|------------|------------|---|---------------------------|
| 0.0000931  | -0.0004000 | 0.0000000  |   |                           |
| 3411: 55   | 15 40      | 1 56 15 41 | 0 | 1308.7660500 1308.7659715 |
| 0.0000785  | -0.0004000 | 0.0000000  |   |                           |
| 3412: 54   | 15 39      | 1 55 15 40 | 0 | 1309.0259300 1309.0258199 |
| 0.0001101  | -0.0004000 | 0.0000000  |   |                           |
| 3413: 53   | 15 38      | 1 54 15 39 | 0 | 1309.2860800 1309.2856306 |
| 0.0004494  | -0.0004000 | 0.0000000  |   |                           |
| 3414: 52   | 15 37      | 1 53 15 38 | 0 | 1309.5451100 1309.5454017 |
| -0.0002917 | -0.0004000 | 0.0000000  |   |                           |
| 3415: 51   | 15 36      | 1 52 15 37 | 0 | 1309.8051500 1309.8051318 |
| 0.0000182  | -0.0004000 | 0.0000000  |   |                           |
| 3416: 50   | 15 35      | 1 51 15 36 | 0 | 1310.0646000 1310.0648191 |
| -0.0002191 | -0.0004000 | 0.0000000  |   |                           |
| 3417: 49   | 15 34      | 1 50 15 35 | 0 | 1310.3244600 1310.3244620 |
| -0.0000020 | -0.0004000 | 0.0000000  |   |                           |
| 3418: 48   | 15 33      | 1 49 15 34 | 0 | 1310.5842200 1310.5840589 |
| 0.0001611  | -0.0004000 | 0.0000000  |   |                           |
| 3419: 47   | 15 32      | 1 48 15 33 | 0 | 1310.8438100 1310.8436080 |
| 0.0002020  | -0.0004000 | 0.0000000  |   |                           |
| 3420: 46   | 15 31      | 1 47 15 32 | 0 | 1311.1026500 1311.1031079 |
| -0.0004579 | -0.0004000 | 0.0000000  |   |                           |
| 3421: 45   | 15 30      | 1 46 15 31 | 0 | 1311.3623000 1311.3625568 |
| -0.0002568 | -0.0004000 | 0.0000000  |   |                           |
| 3422: 44   | 15 29      | 1 45 15 30 | 0 | 1311.6218400 1311.6219530 |
| -0.0001130 | -0.0004000 | 0.0000000  |   |                           |
| 3423: 43   | 15 28      | 1 44 15 29 | 0 | 1311.8816300 1311.8812950 |
| 0.0003350  | -0.0004000 | 0.0000000  |   |                           |
| 3424: 42   | 15 27      | 1 43 15 28 | 0 | 1312.1406300 1312.1405812 |
| 0.0000488  | -0.0004000 | 0.0000000  |   |                           |
| 3425: 41   | 15 26      | 1 42 15 27 | 0 | 1312.4005700 1312.3998098 |
| 0.0007602  | -0.0004000 | 0.0000000  |   |                           |
| 3426: 40   | 15 25      | 1 41 15 26 | 0 | 1312.6595000 1312.6589792 |
| 0.0005208  | -0.0004000 | 0.0000000  |   |                           |
| 3427: 39   | 15 24      | 1 40 15 25 | 0 | 1312.9184700 1312.9180878 |
| 0.0003822  | -0.0004000 | 0.0000000  |   |                           |
| 3428: 38   | 15 23      | 1 39 15 24 | 0 | 1313.1778900 1313.1771340 |
| 0.0007560  | -0.0004000 | 0.0000000  |   |                           |
| 3429: 37   | 15 22      | 1 38 15 23 | 0 | 1313.4367900 1313.4361161 |
| 0.0006739  | -0.0004000 | 0.0000000  |   |                           |
| 3430: 36   | 15 21      | 1 37 15 22 | 0 | 1313.6952500 1313.6950325 |
| 0.0002175  | -0.0004000 | 0.0000000  |   |                           |
| 3431: 35   | 15 20      | 1 36 15 21 | 0 | 1313.9542300 1313.9538816 |
| 0.0003484  | -0.0004000 | 0.0000000  |   |                           |
| 3432: 34   | 15 19      | 1 35 15 20 | 0 | 1314.2128300 1314.2126617 |
| 0.0001683  | -0.0004000 | 0.0000000  |   |                           |
| 3433: 33   | 15 18      | 1 34 15 19 | 0 | 1314.4717200 1314.4713712 |
| 0.0003488  | -0.0004000 | 0.0000000  |   |                           |
| 3434: 32   | 15 17      | 1 33 15 18 | 0 | 1314.7298000 1314.7300085 |
| -0.0002085 | -0.0004000 | 0.0000000  |   |                           |
| 3435: 31   | 15 16      | 1 32 15 17 | 0 | 1314.9888100 1314.9885719 |
| 0.0002381  | -0.0004000 | 0.0000000  |   |                           |
| 3436: 30   | 15 15      | 1 31 15 16 | 0 | 1315.2469900 1315.2470598 |
| -0.0000698 | -0.0004000 | 0.0000000  |   |                           |
| 3437: 29   | 15 14      | 1 30 15 15 | 0 | 1315.5058500 1315.5054707 |
| 0.0003793  | -0.0004000 | 0.0000000  |   |                           |
| 3438: 27   | 15 12      | 1 28 15 13 | 0 | 1316.0216900 1316.0220546 |
| -0.0003646 | -0.0004000 | 0.0000000  |   |                           |
| 3439: 26   | 15 11      | 1 27 15 12 | 0 | 1316.2799600 1316.2802244 |
| -0.0002644 | -0.0004000 | 0.0000000  |   |                           |
| 3440: 24   | 15 9       | 1 25 15 10 | 0 | 1316.7964400 1316.7963116 |
| 0.0001284  | -0.0004000 | 0.0000000  |   |                           |
| 3441: 23   | 15 8       | 1 24 15 9  | 0 | 1317.0547200 1317.0542258 |
| 0.0004942  | -0.0004000 | 0.0000000  |   |                           |
| 3442: 22   | 15 7       | 1 23 15 8  | 0 | 1317.3120100 1317.3120515 |
| -0.0000415 | -0.0004000 | 0.0000000  |   |                           |

|                                 |              |              |
|---------------------------------|--------------|--------------|
| 3443: 21 15 6 1 22 15 7 0       | 1317.5695600 | 1317.5697872 |
| -0.0002272 -0.0004000 0.0000000 |              |              |
| 3444: 23 15 8 1 22 15 7 0       | 1329.0486600 | 1329.0487210 |
| -0.0000610 -0.0004000 0.0000000 |              |              |
| 3445: 24 15 9 1 23 15 8 0       | 1329.3010700 | 1329.3005845 |
| 0.0004855 -0.0004000 0.0000000  |              |              |
| 3446: 25 15 10 1 24 15 9 0      | 1329.5520500 | 1329.5522827 |
| -0.0002327 -0.0004000 0.0000000 |              |              |
| 3447: 26 15 11 1 25 15 10 0     | 1329.8037800 | 1329.8038140 |
| -0.0000340 -0.0004000 0.0000000 |              |              |
| 3448: 27 15 12 1 26 15 11 0     | 1330.0552300 | 1330.0551768 |
| 0.0000532 -0.0004000 0.0000000  |              |              |
| 3449: 30 15 15 1 29 15 14 0     | 1330.8085700 | 1330.8082376 |
| 0.0003324 -0.0004000 0.0000000  |              |              |
| 3450: 32 15 17 1 31 15 16 0     | 1331.3098100 | 1331.3094056 |
| 0.0004044 -0.0004000 0.0000000  |              |              |
| 3451: 34 15 19 1 33 15 18 0     | 1331.8104000 | 1331.8098602 |
| 0.0005398 -0.0004000 0.0000000  |              |              |
| 3452: 38 15 23 1 37 15 22 0     | 1332.8090200 | 1332.8085763 |
| 0.0004437 -0.0004000 0.0000000  |              |              |
| 3453: 43 15 28 1 42 15 27 0     | 1334.0528300 | 1334.0527221 |
| 0.0001079 -0.0004000 0.0000000  |              |              |
| 3454: 44 15 29 1 43 15 28 0     | 1334.3013400 | 1334.3009678 |
| 0.0003722 -0.0004000 0.0000000  |              |              |
| 3455: 45 15 30 1 44 15 29 0     | 1334.5493100 | 1334.5490152 |
| 0.0002948 -0.0004000 0.0000000  |              |              |
| 3456: 47 15 32 1 46 15 31 0     | 1335.0447300 | 1335.0445078 |
| 0.0002222 -0.0004000 0.0000000  |              |              |
| 3457: 52 15 37 1 51 15 36 0     | 1336.2797500 | 1336.2796469 |
| 0.0001031 -0.0004000 0.0000000  |              |              |
| 3458: 53 15 38 1 52 15 37 0     | 1336.5261300 | 1336.5260450 |
| 0.0000850 -0.0004000 0.0000000  |              |              |
| 3459: 54 15 39 1 53 15 38 0     | 1336.7722500 | 1336.7722291 |
| 0.0000209 -0.0004000 0.0000000  |              |              |
| 3460: 55 15 40 1 54 15 39 0     | 1337.0177200 | 1337.0181975 |
| -0.0004775 -0.0004000 0.0000000 |              |              |
| 3461: 58 15 43 1 57 15 42 0     | 1337.7548100 | 1337.7547903 |
| 0.0000197 -0.0004000 0.0000000  |              |              |
| 3462: 59 15 44 1 58 15 43 0     | 1338.0000600 | 1337.9998778 |
| 0.0001822 -0.0004000 0.0000000  |              |              |
| 3463: 60 15 45 1 59 15 44 0     | 1338.2449200 | 1338.2447407 |
| 0.0001793 -0.0004000 0.0000000  |              |              |
| 3464: 62 15 47 1 61 15 46 0     | 1338.7342300 | 1338.7337852 |
| 0.0004448 -0.0004000 0.0000000  |              |              |
| 3465: 63 15 48 1 62 15 47 0     | 1338.9782400 | 1338.9779631 |
| 0.0002769 -0.0004000 0.0000000  |              |              |
| 3466: 64 15 49 1 63 15 48 0     | 1339.2219100 | 1339.2219091 |
| 0.0000009 -0.0004000 0.0000000  |              |              |
| 3467: 65 15 50 1 64 15 49 0     | 1339.4651200 | 1339.4656212 |
| -0.0005012 -0.0004000 0.0000000 |              |              |
| 3468: 66 15 51 1 65 15 50 0     | 1339.7083000 | 1339.7090977 |
| -0.0007977 -0.0004000 0.0000000 |              |              |
| 3469: 68 15 53 1 67 15 52 0     | 1340.1945100 | 1340.1953362 |
| -0.0008262 -0.0004000 0.0000000 |              |              |
| 3470: 70 15 55 1 69 15 54 0     | 1340.6800200 | 1340.6806096 |
| -0.0005896 -0.0004000 0.0000000 |              |              |
| 3471: 73 15 58 1 72 15 57 0     | 1341.4060900 | 1341.4066768 |
| -0.0005868 -0.0004000 0.0000000 |              |              |
| 3472: 74 15 59 1 73 15 58 0     | 1341.6482600 | 1341.6482002 |
| 0.0000598 -0.0004000 0.0000000  |              |              |
| 3473: 75 15 60 1 74 15 59 0     | 1341.8890900 | 1341.8894708 |
| -0.0003808 -0.0004000 0.0000000 |              |              |
| 3474: 76 15 61 1 75 15 60 0     | 1342.1304600 | 1342.1304867 |
| -0.0000267 -0.0004000 0.0000000 |              |              |
| 3475: 77 15 62 1 76 15 61 0     | 1342.3706600 | 1342.3712459 |

|            |            |           |              |              |
|------------|------------|-----------|--------------|--------------|
| -0.0005859 | -0.0004000 | 0.0000000 |              |              |
| 3476:      | 78         | 15        | 63           | 1 77 15 62 0 |
| 0.0000536  | -0.0004000 | 0.0000000 | 1342.6118000 | 1342.6117464 |
| 3477:      | 79         | 15        | 64           | 1 78 15 63 0 |
| 0.0001036  | -0.0004000 | 0.0000000 | 1342.8520900 | 1342.8519864 |
| 3478:      | 81         | 15        | 67           | 1 82 15 68 0 |
| 0.0000512  | -0.0004000 | 0.0000000 | 1302.0020800 | 1302.0020288 |
| 3479:      | 80         | 15        | 66           | 1 81 15 67 0 |
| 0.0003066  | -0.0004000 | 0.0000000 | 1302.2625900 | 1302.2622834 |
| 3480:      | 76         | 15        | 62           | 1 77 15 63 0 |
| 0.0004561  | -0.0004000 | 0.0000000 | 1303.3037900 | 1303.3033339 |
| 3481:      | 75         | 15        | 61           | 1 76 15 62 0 |
| 0.0005936  | -0.0004000 | 0.0000000 | 1303.5641900 | 1303.5635964 |
| 3482:      | 73         | 15        | 59           | 1 74 15 60 0 |
| 0.0003601  | -0.0004000 | 0.0000000 | 1304.0844700 | 1304.0841099 |
| 3483:      | 72         | 15        | 58           | 1 73 15 59 0 |
| 0.0004724  | -0.0004000 | 0.0000000 | 1304.3448300 | 1304.3443576 |
| 3484:      | 70         | 15        | 56           | 1 71 15 57 0 |
| -0.0002667 | -0.0004000 | 0.0000000 | 1304.8645600 | 1304.8648267 |
| 3485:      | 69         | 15        | 55           | 1 70 15 56 0 |
| -0.0000248 | -0.0004000 | 0.0000000 | 1305.1250200 | 1305.1250448 |
| 3486:      | 68         | 15        | 54           | 1 69 15 55 0 |
| 0.0001302  | -0.0004000 | 0.0000000 | 1305.3853800 | 1305.3852498 |
| 3487:      | 67         | 15        | 53           | 1 68 15 54 0 |
| -0.0000700 | -0.0004000 | 0.0000000 | 1305.6453700 | 1305.6454400 |
| 3488:      | 66         | 15        | 52           | 1 67 15 53 0 |
| -0.0002738 | -0.0004000 | 0.0000000 | 1305.9053400 | 1305.9056138 |
| 3489:      | 65         | 15        | 51           | 1 66 15 52 0 |
| -0.0000495 | -0.0004000 | 0.0000000 | 1306.1657200 | 1306.1657695 |
| 3490:      | 64         | 15        | 50           | 1 65 15 51 0 |
| -0.0001656 | -0.0004000 | 0.0000000 | 1306.4257400 | 1306.4259056 |
| 3491:      | 61         | 15        | 47           | 1 62 15 48 0 |
| -0.0002690 | -0.0004000 | 0.0000000 | 1307.2059100 | 1307.2061790 |
| 3492:      | 60         | 15        | 46           | 1 61 15 47 0 |
| -0.0004397 | -0.0004000 | 0.0000000 | 1307.4657800 | 1307.4662197 |
| 3493:      | 57         | 15        | 43           | 1 58 15 44 0 |
| -0.0001278 | -0.0004000 | 0.0000000 | 1308.2460400 | 1308.2461678 |
| 3494:      | 56         | 15        | 42           | 1 57 15 43 0 |
| 0.0000931  | -0.0004000 | 0.0000000 | 1308.5061800 | 1308.5060869 |
| 3495:      | 55         | 15        | 41           | 1 56 15 42 0 |
| 0.0000785  | -0.0004000 | 0.0000000 | 1308.7660500 | 1308.7659715 |
| 3496:      | 54         | 15        | 40           | 1 55 15 41 0 |
| 0.0001101  | -0.0004000 | 0.0000000 | 1309.0259300 | 1309.0258199 |
| 3497:      | 53         | 15        | 39           | 1 54 15 40 0 |
| 0.0004494  | -0.0004000 | 0.0000000 | 1309.2860800 | 1309.2856306 |
| 3498:      | 52         | 15        | 38           | 1 53 15 39 0 |
| -0.0002917 | -0.0004000 | 0.0000000 | 1309.5451100 | 1309.5454017 |
| 3499:      | 51         | 15        | 37           | 1 52 15 38 0 |
| 0.0000182  | -0.0004000 | 0.0000000 | 1309.8051500 | 1309.8051318 |
| 3500:      | 50         | 15        | 36           | 1 51 15 37 0 |
| -0.0002191 | -0.0004000 | 0.0000000 | 1310.0646000 | 1310.0648191 |
| 3501:      | 49         | 15        | 35           | 1 50 15 36 0 |
| -0.0000020 | -0.0004000 | 0.0000000 | 1310.3244600 | 1310.3244620 |
| 3502:      | 48         | 15        | 34           | 1 49 15 35 0 |
| 0.0001611  | -0.0004000 | 0.0000000 | 1310.5842200 | 1310.5840589 |
| 3503:      | 47         | 15        | 33           | 1 48 15 34 0 |
| 0.0002020  | -0.0004000 | 0.0000000 | 1310.8438100 | 1310.8436080 |
| 3504:      | 46         | 15        | 32           | 1 47 15 33 0 |
| -0.0004579 | -0.0004000 | 0.0000000 | 1311.1026500 | 1311.1031079 |
| 3505:      | 45         | 15        | 31           | 1 46 15 32 0 |
| -0.0002568 | -0.0004000 | 0.0000000 | 1311.3623000 | 1311.3625568 |
| 3506:      | 44         | 15        | 30           | 1 45 15 31 0 |
| -0.0001130 | -0.0004000 | 0.0000000 | 1311.6218400 | 1311.6219530 |
| 3507:      | 43         | 15        | 29           | 1 44 15 30 0 |
| 0.0003350  | -0.0004000 | 0.0000000 | 1311.8816300 | 1311.8812950 |

|            |            |           |    |   |    |    |    |   |              |              |
|------------|------------|-----------|----|---|----|----|----|---|--------------|--------------|
| 3508:      | 42         | 15        | 28 | 1 | 43 | 15 | 29 | 0 | 1312.1406300 | 1312.1405812 |
| 0.0000488  | -0.0004000 | 0.0000000 |    |   |    |    |    |   |              |              |
| 3509:      | 41         | 15        | 27 | 1 | 42 | 15 | 28 | 0 | 1312.4005700 | 1312.3998098 |
| 0.0007602  | -0.0004000 | 0.0000000 |    |   |    |    |    |   |              |              |
| 3510:      | 40         | 15        | 26 | 1 | 41 | 15 | 27 | 0 | 1312.6595000 | 1312.6589792 |
| 0.0005208  | -0.0004000 | 0.0000000 |    |   |    |    |    |   |              |              |
| 3511:      | 39         | 15        | 25 | 1 | 40 | 15 | 26 | 0 | 1312.9184700 | 1312.9180878 |
| 0.0003822  | -0.0004000 | 0.0000000 |    |   |    |    |    |   |              |              |
| 3512:      | 38         | 15        | 24 | 1 | 39 | 15 | 25 | 0 | 1313.1778900 | 1313.1771340 |
| 0.0007560  | -0.0004000 | 0.0000000 |    |   |    |    |    |   |              |              |
| 3513:      | 37         | 15        | 23 | 1 | 38 | 15 | 24 | 0 | 1313.4367900 | 1313.4361161 |
| 0.0006739  | -0.0004000 | 0.0000000 |    |   |    |    |    |   |              |              |
| 3514:      | 36         | 15        | 22 | 1 | 37 | 15 | 23 | 0 | 1313.6952500 | 1313.6950325 |
| 0.0002175  | -0.0004000 | 0.0000000 |    |   |    |    |    |   |              |              |
| 3515:      | 35         | 15        | 21 | 1 | 36 | 15 | 22 | 0 | 1313.9542300 | 1313.9538816 |
| 0.0003484  | -0.0004000 | 0.0000000 |    |   |    |    |    |   |              |              |
| 3516:      | 34         | 15        | 20 | 1 | 35 | 15 | 21 | 0 | 1314.2128300 | 1314.2126617 |
| 0.0001683  | -0.0004000 | 0.0000000 |    |   |    |    |    |   |              |              |
| 3517:      | 33         | 15        | 19 | 1 | 34 | 15 | 20 | 0 | 1314.4717200 | 1314.4713712 |
| 0.0003488  | -0.0004000 | 0.0000000 |    |   |    |    |    |   |              |              |
| 3518:      | 32         | 15        | 18 | 1 | 33 | 15 | 19 | 0 | 1314.7298000 | 1314.7300085 |
| -0.0002085 | -0.0004000 | 0.0000000 |    |   |    |    |    |   |              |              |
| 3519:      | 31         | 15        | 17 | 1 | 32 | 15 | 18 | 0 | 1314.9888100 | 1314.9885719 |
| 0.0002381  | -0.0004000 | 0.0000000 |    |   |    |    |    |   |              |              |
| 3520:      | 30         | 15        | 16 | 1 | 31 | 15 | 17 | 0 | 1315.2469900 | 1315.2470598 |
| -0.0000698 | -0.0004000 | 0.0000000 |    |   |    |    |    |   |              |              |
| 3521:      | 29         | 15        | 15 | 1 | 30 | 15 | 16 | 0 | 1315.5058500 | 1315.5054707 |
| 0.0003793  | -0.0004000 | 0.0000000 |    |   |    |    |    |   |              |              |
| 3522:      | 27         | 15        | 13 | 1 | 28 | 15 | 14 | 0 | 1316.0216900 | 1316.0220546 |
| -0.0003646 | -0.0004000 | 0.0000000 |    |   |    |    |    |   |              |              |
| 3523:      | 26         | 15        | 12 | 1 | 27 | 15 | 13 | 0 | 1316.2799600 | 1316.2802244 |
| -0.0002644 | -0.0004000 | 0.0000000 |    |   |    |    |    |   |              |              |
| 3524:      | 24         | 15        | 10 | 1 | 25 | 15 | 11 | 0 | 1316.7964400 | 1316.7963116 |
| 0.0001284  | -0.0004000 | 0.0000000 |    |   |    |    |    |   |              |              |
| 3525:      | 23         | 15        | 9  | 1 | 24 | 15 | 10 | 0 | 1317.0547200 | 1317.0542258 |
| 0.0004942  | -0.0004000 | 0.0000000 |    |   |    |    |    |   |              |              |
| 3526:      | 22         | 15        | 8  | 1 | 23 | 15 | 9  | 0 | 1317.3120100 | 1317.3120515 |
| -0.0000415 | -0.0004000 | 0.0000000 |    |   |    |    |    |   |              |              |
| 3527:      | 21         | 15        | 7  | 1 | 22 | 15 | 8  | 0 | 1317.5695600 | 1317.5697872 |
| -0.0002272 | -0.0004000 | 0.0000000 |    |   |    |    |    |   |              |              |
| 3528:      | 23         | 15        | 9  | 1 | 22 | 15 | 8  | 0 | 1329.0486600 | 1329.0487210 |
| -0.0000610 | -0.0004000 | 0.0000000 |    |   |    |    |    |   |              |              |
| 3529:      | 24         | 15        | 10 | 1 | 23 | 15 | 9  | 0 | 1329.3010700 | 1329.3005845 |
| 0.0004855  | -0.0004000 | 0.0000000 |    |   |    |    |    |   |              |              |
| 3530:      | 25         | 15        | 11 | 1 | 24 | 15 | 10 | 0 | 1329.5520500 | 1329.5522827 |
| -0.0002327 | -0.0004000 | 0.0000000 |    |   |    |    |    |   |              |              |
| 3531:      | 26         | 15        | 12 | 1 | 25 | 15 | 11 | 0 | 1329.8037800 | 1329.8038140 |
| -0.0000340 | -0.0004000 | 0.0000000 |    |   |    |    |    |   |              |              |
| 3532:      | 27         | 15        | 13 | 1 | 26 | 15 | 12 | 0 | 1330.0552300 | 1330.0551768 |
| 0.0000532  | -0.0004000 | 0.0000000 |    |   |    |    |    |   |              |              |
| 3533:      | 30         | 15        | 16 | 1 | 29 | 15 | 15 | 0 | 1330.8085700 | 1330.8082376 |
| 0.0003324  | -0.0004000 | 0.0000000 |    |   |    |    |    |   |              |              |
| 3534:      | 32         | 15        | 18 | 1 | 31 | 15 | 17 | 0 | 1331.3098100 | 1331.3094056 |
| 0.0004044  | -0.0004000 | 0.0000000 |    |   |    |    |    |   |              |              |
| 3535:      | 34         | 15        | 20 | 1 | 33 | 15 | 19 | 0 | 1331.8104000 | 1331.8098602 |
| 0.0005398  | -0.0004000 | 0.0000000 |    |   |    |    |    |   |              |              |
| 3536:      | 38         | 15        | 24 | 1 | 37 | 15 | 23 | 0 | 1332.8090200 | 1332.8085763 |
| 0.0004437  | -0.0004000 | 0.0000000 |    |   |    |    |    |   |              |              |
| 3537:      | 43         | 15        | 29 | 1 | 42 | 15 | 28 | 0 | 1334.0528300 | 1334.0527221 |
| 0.0001079  | -0.0004000 | 0.0000000 |    |   |    |    |    |   |              |              |
| 3538:      | 44         | 15        | 30 | 1 | 43 | 15 | 29 | 0 | 1334.3013400 | 1334.3009678 |
| 0.0003722  | -0.0004000 | 0.0000000 |    |   |    |    |    |   |              |              |
| 3539:      | 45         | 15        | 31 | 1 | 44 | 15 | 30 | 0 | 1334.5493100 | 1334.5490152 |
| 0.0002948  | -0.0004000 | 0.0000000 |    |   |    |    |    |   |              |              |
| 3540:      | 47         | 15        | 33 | 1 | 46 | 15 | 32 | 0 | 1335.0447300 | 1335.0445078 |

|            |            |            |   |              |              |
|------------|------------|------------|---|--------------|--------------|
| 0.0002222  | -0.0004000 | 0.0000000  |   |              |              |
| 3541: 52   | 15 38      | 1 51 15 37 | 0 | 1336.2797500 | 1336.2796469 |
| 0.0001031  | -0.0004000 | 0.0000000  |   |              |              |
| 3542: 53   | 15 39      | 1 52 15 38 | 0 | 1336.5261300 | 1336.5260450 |
| 0.0000850  | -0.0004000 | 0.0000000  |   |              |              |
| 3543: 54   | 15 40      | 1 53 15 39 | 0 | 1336.7722500 | 1336.7722291 |
| 0.0000209  | -0.0004000 | 0.0000000  |   |              |              |
| 3544: 55   | 15 41      | 1 54 15 40 | 0 | 1337.0177200 | 1337.0181975 |
| -0.0004775 | -0.0004000 | 0.0000000  |   |              |              |
| 3545: 58   | 15 44      | 1 57 15 43 | 0 | 1337.7548100 | 1337.7547903 |
| 0.0000197  | -0.0004000 | 0.0000000  |   |              |              |
| 3546: 59   | 15 45      | 1 58 15 44 | 0 | 1338.0000600 | 1337.9998778 |
| 0.0001822  | -0.0004000 | 0.0000000  |   |              |              |
| 3547: 60   | 15 46      | 1 59 15 45 | 0 | 1338.2449200 | 1338.2447407 |
| 0.0001793  | -0.0004000 | 0.0000000  |   |              |              |
| 3548: 62   | 15 48      | 1 61 15 47 | 0 | 1338.7342300 | 1338.7337852 |
| 0.0004448  | -0.0004000 | 0.0000000  |   |              |              |
| 3549: 63   | 15 49      | 1 62 15 48 | 0 | 1338.9782400 | 1338.9779631 |
| 0.0002769  | -0.0004000 | 0.0000000  |   |              |              |
| 3550: 64   | 15 50      | 1 63 15 49 | 0 | 1339.2219100 | 1339.2219091 |
| 0.0000009  | -0.0004000 | 0.0000000  |   |              |              |
| 3551: 65   | 15 51      | 1 64 15 50 | 0 | 1339.4651200 | 1339.4656212 |
| -0.0005012 | -0.0004000 | 0.0000000  |   |              |              |
| 3552: 66   | 15 52      | 1 65 15 51 | 0 | 1339.7083000 | 1339.7090977 |
| -0.0007977 | -0.0004000 | 0.0000000  |   |              |              |
| 3553: 68   | 15 54      | 1 67 15 53 | 0 | 1340.1945100 | 1340.1953362 |
| -0.0008262 | -0.0004000 | 0.0000000  |   |              |              |
| 3554: 70   | 15 56      | 1 69 15 55 | 0 | 1340.6800200 | 1340.6806096 |
| -0.0005896 | -0.0004000 | 0.0000000  |   |              |              |
| 3555: 73   | 15 59      | 1 72 15 58 | 0 | 1341.4060900 | 1341.4066768 |
| -0.0005868 | -0.0004000 | 0.0000000  |   |              |              |
| 3556: 74   | 15 60      | 1 73 15 59 | 0 | 1341.6482600 | 1341.6482002 |
| 0.0000598  | -0.0004000 | 0.0000000  |   |              |              |
| 3557: 75   | 15 61      | 1 74 15 60 | 0 | 1341.8890900 | 1341.8894708 |
| -0.0003808 | -0.0004000 | 0.0000000  |   |              |              |
| 3558: 76   | 15 62      | 1 75 15 61 | 0 | 1342.1304600 | 1342.1304867 |
| -0.0000267 | -0.0004000 | 0.0000000  |   |              |              |
| 3559: 77   | 15 63      | 1 76 15 62 | 0 | 1342.3706600 | 1342.3712459 |
| -0.0005859 | -0.0004000 | 0.0000000  |   |              |              |
| 3560: 78   | 15 64      | 1 77 15 63 | 0 | 1342.6118000 | 1342.6117464 |
| 0.0000536  | -0.0004000 | 0.0000000  |   |              |              |
| 3561: 79   | 15 65      | 1 78 15 64 | 0 | 1342.8520900 | 1342.8519864 |
| 0.0001036  | -0.0004000 | 0.0000000  |   |              |              |
| 3562: 64   | 16 48      | 1 65 16 49 | 0 | 1306.1024700 | 1306.1029779 |
| -0.0005079 | -0.0004000 | 0.0000000  |   |              |              |
| 3563: 63   | 16 47      | 1 64 16 48 | 0 | 1306.3627100 | 1306.3630793 |
| -0.0003693 | -0.0004000 | 0.0000000  |   |              |              |
| 3564: 62   | 16 46      | 1 63 16 47 | 0 | 1306.6231600 | 1306.6231589 |
| 0.0000011  | -0.0004000 | 0.0000000  |   |              |              |
| 3565: 60   | 16 44      | 1 61 16 45 | 0 | 1307.1429800 | 1307.1432464 |
| -0.0002664 | -0.0004000 | 0.0000000  |   |              |              |
| 3566: 59   | 16 43      | 1 60 16 44 | 0 | 1307.4030300 | 1307.4032509 |
| -0.0002209 | -0.0004000 | 0.0000000  |   |              |              |
| 3567: 56   | 16 40      | 1 57 16 41 | 0 | 1308.1825700 | 1308.1830885 |
| -0.0005185 | -0.0004000 | 0.0000000  |   |              |              |
| 3568: 55   | 16 39      | 1 56 16 40 | 0 | 1308.4432500 | 1308.4429703 |
| 0.0002797  | -0.0004000 | 0.0000000  |   |              |              |
| 3569: 54   | 16 38      | 1 55 16 39 | 0 | 1308.7029000 | 1308.7028172 |
| 0.0000828  | -0.0004000 | 0.0000000  |   |              |              |
| 3570: 51   | 16 35      | 1 52 16 36 | 0 | 1309.4819500 | 1309.4821331 |
| -0.0001831 | -0.0004000 | 0.0000000  |   |              |              |
| 3571: 50   | 16 34      | 1 51 16 35 | 0 | 1309.7413200 | 1309.7418246 |
| -0.0005046 | -0.0004000 | 0.0000000  |   |              |              |
| 3572: 48   | 16 32      | 1 49 16 33 | 0 | 1310.2610200 | 1310.2610773 |
| -0.0000573 | -0.0004000 | 0.0000000  |   |              |              |

|       |            |            |           |   |    |    |    |   |              |              |
|-------|------------|------------|-----------|---|----|----|----|---|--------------|--------------|
| 3573: | 47         | 16         | 31        | 1 | 48 | 16 | 32 | 0 | 1310.5209300 | 1310.5206351 |
|       | 0.0002949  | -0.0004000 | 0.0000000 |   |    |    |    |   |              |              |
| 3574: | 45         | 16         | 29        | 1 | 46 | 16 | 30 | 0 | 1311.0394100 | 1311.0396056 |
|       | -0.0001956 | -0.0004000 | 0.0000000 |   |    |    |    |   |              |              |
| 3575: | 44         | 16         | 28        | 1 | 45 | 16 | 29 | 0 | 1311.2989900 | 1311.2990150 |
|       | -0.0000250 | -0.0004000 | 0.0000000 |   |    |    |    |   |              |              |
| 3576: | 43         | 16         | 27        | 1 | 44 | 16 | 28 | 0 | 1311.5587600 | 1311.5583716 |
|       | 0.0003884  | -0.0004000 | 0.0000000 |   |    |    |    |   |              |              |
| 3577: | 42         | 16         | 26        | 1 | 43 | 16 | 27 | 0 | 1311.8173700 | 1311.8176739 |
|       | -0.0003039 | -0.0004000 | 0.0000000 |   |    |    |    |   |              |              |
| 3578: | 38         | 16         | 22        | 1 | 39 | 16 | 23 | 0 | 1312.8542600 | 1312.8543065 |
|       | -0.0000465 | -0.0004000 | 0.0000000 |   |    |    |    |   |              |              |
| 3579: | 37         | 16         | 21        | 1 | 38 | 16 | 22 | 0 | 1313.1135300 | 1313.1133124 |
|       | 0.0002176  | -0.0004000 | 0.0000000 |   |    |    |    |   |              |              |
| 3580: | 36         | 16         | 20        | 1 | 37 | 16 | 21 | 0 | 1313.3718600 | 1313.3722540 |
|       | -0.0003940 | -0.0004000 | 0.0000000 |   |    |    |    |   |              |              |
| 3581: | 34         | 16         | 18        | 1 | 35 | 16 | 19 | 0 | 1313.8900100 | 1313.8899382 |
|       | 0.0000718  | -0.0004000 | 0.0000000 |   |    |    |    |   |              |              |
| 3582: | 33         | 16         | 17        | 1 | 34 | 16 | 18 | 0 | 1314.1483500 | 1314.1486775 |
|       | -0.0003275 | -0.0004000 | 0.0000000 |   |    |    |    |   |              |              |
| 3583: | 32         | 16         | 16        | 1 | 33 | 16 | 17 | 0 | 1314.4073000 | 1314.4073460 |
|       | -0.0000460 | -0.0004000 | 0.0000000 |   |    |    |    |   |              |              |
| 3584: | 30         | 16         | 14        | 1 | 31 | 16 | 15 | 0 | 1314.9244300 | 1314.9244643 |
|       | -0.0000343 | -0.0004000 | 0.0000000 |   |    |    |    |   |              |              |
| 3585: | 29         | 16         | 13        | 1 | 30 | 16 | 14 | 0 | 1315.1826100 | 1315.1829109 |
|       | -0.0003009 | -0.0004000 | 0.0000000 |   |    |    |    |   |              |              |
| 3586: | 26         | 16         | 10        | 1 | 27 | 16 | 11 | 0 | 1315.9576300 | 1315.9577803 |
|       | -0.0001503 | -0.0004000 | 0.0000000 |   |    |    |    |   |              |              |
| 3587: | 18         | 16         | 2         | 1 | 17 | 16 | 1  | 0 | 1327.4674700 | 1327.4673692 |
|       | 0.0001008  | -0.0004000 | 0.0000000 |   |    |    |    |   |              |              |
| 3588: | 19         | 16         | 3         | 1 | 18 | 16 | 2  | 0 | 1327.7201700 | 1327.7201064 |
|       | 0.0000636  | -0.0004000 | 0.0000000 |   |    |    |    |   |              |              |
| 3589: | 20         | 16         | 4         | 1 | 19 | 16 | 3  | 0 | 1327.9730100 | 1327.9726860 |
|       | 0.0003240  | -0.0004000 | 0.0000000 |   |    |    |    |   |              |              |
| 3590: | 21         | 16         | 5         | 1 | 20 | 16 | 4  | 0 | 1328.2245600 | 1328.2251062 |
|       | -0.0005462 | -0.0004000 | 0.0000000 |   |    |    |    |   |              |              |
| 3591: | 22         | 16         | 6         | 1 | 21 | 16 | 5  | 0 | 1328.4768800 | 1328.4773655 |
|       | -0.0004855 | -0.0004000 | 0.0000000 |   |    |    |    |   |              |              |
| 3592: | 23         | 16         | 7         | 1 | 22 | 16 | 6  | 0 | 1328.7292600 | 1328.7294621 |
|       | -0.0002021 | -0.0004000 | 0.0000000 |   |    |    |    |   |              |              |
| 3593: | 24         | 16         | 8         | 1 | 23 | 16 | 7  | 0 | 1328.9811600 | 1328.9813944 |
|       | -0.0002344 | -0.0004000 | 0.0000000 |   |    |    |    |   |              |              |
| 3594: | 26         | 16         | 10        | 1 | 25 | 16 | 9  | 0 | 1329.4845000 | 1329.4847591 |
|       | -0.0002591 | -0.0004000 | 0.0000000 |   |    |    |    |   |              |              |
| 3595: | 27         | 16         | 11        | 1 | 26 | 16 | 10 | 0 | 1329.7359400 | 1329.7361883 |
|       | -0.0002483 | -0.0004000 | 0.0000000 |   |    |    |    |   |              |              |
| 3596: | 28         | 16         | 12        | 1 | 27 | 16 | 11 | 0 | 1329.9869300 | 1329.9874463 |
|       | -0.0005163 | -0.0004000 | 0.0000000 |   |    |    |    |   |              |              |
| 3597: | 29         | 16         | 13        | 1 | 28 | 16 | 12 | 0 | 1330.2386800 | 1330.2385315 |
|       | 0.0001485  | -0.0004000 | 0.0000000 |   |    |    |    |   |              |              |
| 3598: | 30         | 16         | 14        | 1 | 29 | 16 | 13 | 0 | 1330.4897900 | 1330.4894422 |
|       | 0.0003478  | -0.0004000 | 0.0000000 |   |    |    |    |   |              |              |
| 3599: | 31         | 16         | 15        | 1 | 30 | 16 | 14 | 0 | 1330.7397400 | 1330.7401768 |
|       | -0.0004368 | -0.0004000 | 0.0000000 |   |    |    |    |   |              |              |
| 3600: | 32         | 16         | 16        | 1 | 31 | 16 | 15 | 0 | 1330.9910500 | 1330.9907334 |
|       | 0.0003166  | -0.0004000 | 0.0000000 |   |    |    |    |   |              |              |
| 3601: | 33         | 16         | 17        | 1 | 32 | 16 | 16 | 0 | 1331.2408700 | 1331.2411104 |
|       | -0.0002404 | -0.0004000 | 0.0000000 |   |    |    |    |   |              |              |
| 3602: | 34         | 16         | 18        | 1 | 33 | 16 | 17 | 0 | 1331.4910900 | 1331.4913061 |
|       | -0.0002161 | -0.0004000 | 0.0000000 |   |    |    |    |   |              |              |
| 3603: | 36         | 16         | 20        | 1 | 35 | 16 | 19 | 0 | 1331.9913100 | 1331.9911465 |
|       | 0.0001635  | -0.0004000 | 0.0000000 |   |    |    |    |   |              |              |
| 3604: | 40         | 16         | 24        | 1 | 39 | 16 | 23 | 0 | 1332.9883400 | 1332.9885754 |
|       | -0.0002354 | -0.0004000 | 0.0000000 |   |    |    |    |   |              |              |
| 3605: | 42         | 16         | 26        | 1 | 41 | 16 | 25 | 0 | 1333.4864100 | 1333.4861359 |





|            |            |           |    |   |    |    |    |   |              |              |
|------------|------------|-----------|----|---|----|----|----|---|--------------|--------------|
| 3638:      | 21         | 16        | 6  | 1 | 22 | 16 | 7  | 0 | 1317.2471200 | 1317.2475640 |
| -0.0004440 | -0.0004000 | 0.0000000 |    |   |    |    |    |   |              |              |
| 3639:      | 18         | 16        | 3  | 1 | 17 | 16 | 2  | 0 | 1327.4674700 | 1327.4673692 |
| 0.0001008  | -0.0004000 | 0.0000000 |    |   |    |    |    |   |              |              |
| 3640:      | 19         | 16        | 4  | 1 | 18 | 16 | 3  | 0 | 1327.7201700 | 1327.7201064 |
| 0.0000636  | -0.0004000 | 0.0000000 |    |   |    |    |    |   |              |              |
| 3641:      | 20         | 16        | 5  | 1 | 19 | 16 | 4  | 0 | 1327.9730100 | 1327.9726860 |
| 0.0003240  | -0.0004000 | 0.0000000 |    |   |    |    |    |   |              |              |
| 3642:      | 21         | 16        | 6  | 1 | 20 | 16 | 5  | 0 | 1328.2245600 | 1328.2251062 |
| -0.0005462 | -0.0004000 | 0.0000000 |    |   |    |    |    |   |              |              |
| 3643:      | 22         | 16        | 7  | 1 | 21 | 16 | 6  | 0 | 1328.4768800 | 1328.4773655 |
| -0.0004855 | -0.0004000 | 0.0000000 |    |   |    |    |    |   |              |              |
| 3644:      | 23         | 16        | 8  | 1 | 22 | 16 | 7  | 0 | 1328.7292600 | 1328.7294621 |
| -0.0002021 | -0.0004000 | 0.0000000 |    |   |    |    |    |   |              |              |
| 3645:      | 24         | 16        | 9  | 1 | 23 | 16 | 8  | 0 | 1328.9811600 | 1328.9813944 |
| -0.0002344 | -0.0004000 | 0.0000000 |    |   |    |    |    |   |              |              |
| 3646:      | 26         | 16        | 11 | 1 | 25 | 16 | 10 | 0 | 1329.4845000 | 1329.4847591 |
| -0.0002591 | -0.0004000 | 0.0000000 |    |   |    |    |    |   |              |              |
| 3647:      | 27         | 16        | 12 | 1 | 26 | 16 | 11 | 0 | 1329.7359400 | 1329.7361883 |
| -0.0002483 | -0.0004000 | 0.0000000 |    |   |    |    |    |   |              |              |
| 3648:      | 28         | 16        | 13 | 1 | 27 | 16 | 12 | 0 | 1329.9869300 | 1329.9874463 |
| -0.0005163 | -0.0004000 | 0.0000000 |    |   |    |    |    |   |              |              |
| 3649:      | 29         | 16        | 14 | 1 | 28 | 16 | 13 | 0 | 1330.2386800 | 1330.2385315 |
| 0.0001485  | -0.0004000 | 0.0000000 |    |   |    |    |    |   |              |              |
| 3650:      | 30         | 16        | 15 | 1 | 29 | 16 | 14 | 0 | 1330.4897900 | 1330.4894422 |
| 0.0003478  | -0.0004000 | 0.0000000 |    |   |    |    |    |   |              |              |
| 3651:      | 31         | 16        | 16 | 1 | 30 | 16 | 15 | 0 | 1330.7397400 | 1330.7401768 |
| -0.0004368 | -0.0004000 | 0.0000000 |    |   |    |    |    |   |              |              |
| 3652:      | 32         | 16        | 17 | 1 | 31 | 16 | 16 | 0 | 1330.9910500 | 1330.9907334 |
| 0.0003166  | -0.0004000 | 0.0000000 |    |   |    |    |    |   |              |              |
| 3653:      | 33         | 16        | 18 | 1 | 32 | 16 | 17 | 0 | 1331.2408700 | 1331.2411104 |
| -0.0002404 | -0.0004000 | 0.0000000 |    |   |    |    |    |   |              |              |
| 3654:      | 34         | 16        | 19 | 1 | 33 | 16 | 18 | 0 | 1331.4910900 | 1331.4913061 |
| -0.0002161 | -0.0004000 | 0.0000000 |    |   |    |    |    |   |              |              |
| 3655:      | 36         | 16        | 21 | 1 | 35 | 16 | 20 | 0 | 1331.9913100 | 1331.9911465 |
| 0.0001635  | -0.0004000 | 0.0000000 |    |   |    |    |    |   |              |              |
| 3656:      | 40         | 16        | 25 | 1 | 39 | 16 | 24 | 0 | 1332.9883400 | 1332.9885754 |
| -0.0002354 | -0.0004000 | 0.0000000 |    |   |    |    |    |   |              |              |
| 3657:      | 42         | 16        | 27 | 1 | 41 | 16 | 26 | 0 | 1333.4864100 | 1333.4861359 |
| 0.0002741  | -0.0004000 | 0.0000000 |    |   |    |    |    |   |              |              |
| 3658:      | 43         | 16        | 28 | 1 | 42 | 16 | 27 | 0 | 1333.7349200 | 1333.7346215 |
| 0.0002985  | -0.0004000 | 0.0000000 |    |   |    |    |    |   |              |              |
| 3659:      | 46         | 16        | 31 | 1 | 45 | 16 | 30 | 0 | 1334.4789700 | 1334.4788788 |
| 0.0000912  | -0.0004000 | 0.0000000 |    |   |    |    |    |   |              |              |
| 3660:      | 47         | 16        | 32 | 1 | 46 | 16 | 31 | 0 | 1334.7265700 | 1334.7265587 |
| 0.0000113  | -0.0004000 | 0.0000000 |    |   |    |    |    |   |              |              |
| 3661:      | 49         | 16        | 34 | 1 | 48 | 16 | 33 | 0 | 1335.2210600 | 1335.2212991 |
| -0.0002391 | -0.0004000 | 0.0000000 |    |   |    |    |    |   |              |              |
| 3662:      | 50         | 16        | 35 | 1 | 49 | 16 | 34 | 0 | 1335.4686000 | 1335.4683560 |
| 0.0002440  | -0.0004000 | 0.0000000 |    |   |    |    |    |   |              |              |
| 3663:      | 53         | 16        | 38 | 1 | 52 | 16 | 37 | 0 | 1336.2089400 | 1336.2082514 |
| 0.0006886  | -0.0004000 | 0.0000000 |    |   |    |    |    |   |              |              |
| 3664:      | 59         | 16        | 44 | 1 | 58 | 16 | 43 | 0 | 1337.6830200 | 1337.6821395 |
| 0.0008805  | -0.0004000 | 0.0000000 |    |   |    |    |    |   |              |              |
| 3665:      | 60         | 16        | 45 | 1 | 59 | 16 | 44 | 0 | 1337.9278000 | 1337.9270006 |
| 0.0007994  | -0.0004000 | 0.0000000 |    |   |    |    |    |   |              |              |
| 3666:      | 76         | 17        | 59 | 1 | 77 | 17 | 60 | 0 | 1302.6380100 | 1302.6378323 |
| 0.0001777  | -0.0004000 | 0.0000000 |    |   |    |    |    |   |              |              |
| 3667:      | 75         | 17        | 58 | 1 | 76 | 17 | 59 | 0 | 1302.8982900 | 1302.8980532 |
| 0.0002368  | -0.0004000 | 0.0000000 |    |   |    |    |    |   |              |              |
| 3668:      | 74         | 17        | 57 | 1 | 75 | 17 | 58 | 0 | 1303.1587000 | 1303.1582725 |
| 0.0004275  | -0.0004000 | 0.0000000 |    |   |    |    |    |   |              |              |
| 3669:      | 72         | 17        | 55 | 1 | 73 | 17 | 56 | 0 | 1303.6786500 | 1303.6786998 |
| -0.0000498 | -0.0004000 | 0.0000000 |    |   |    |    |    |   |              |              |
| 3670:      | 67         | 17        | 50 | 1 | 68 | 17 | 51 | 0 | 1304.9794400 | 1304.9796293 |

|            |            |           |              |              |
|------------|------------|-----------|--------------|--------------|
| -0.0001893 | -0.0004000 | 0.0000000 |              |              |
| 3671: 66   | 17         | 49        | 1            | 67 17 50 0   |
| 0.0001113  | -0.0004000 | 0.0000000 | 1305.2398900 | 1305.2397787 |
| 3672: 64   | 17         | 47        | 1            | 65 17 48 0   |
| -0.0003683 | -0.0004000 | 0.0000000 | 1305.7596600 | 1305.7600283 |
| 3673: 63   | 17         | 46        | 1            | 64 17 47 0   |
| -0.0006654 | -0.0004000 | 0.0000000 | 1306.0194600 | 1306.0201254 |
| 3674: 62   | 17         | 45        | 1            | 63 17 46 0   |
| -0.0005118 | -0.0004000 | 0.0000000 | 1306.2796900 | 1306.2802018 |
| 3675: 61   | 17         | 44        | 1            | 62 17 45 0   |
| 0.0004341  | -0.0004000 | 0.0000000 | 1306.5406900 | 1306.5402559 |
| 3676: 60   | 17         | 43        | 1            | 61 17 44 0   |
| 0.0003838  | -0.0004000 | 0.0000000 | 1306.8006700 | 1306.8002862 |
| 3677: 58   | 17         | 41        | 1            | 59 17 42 0   |
| 0.0004112  | -0.0004000 | 0.0000000 | 1307.3206800 | 1307.3202688 |
| 3678: 57   | 17         | 40        | 1            | 58 17 41 0   |
| 0.0000721  | -0.0004000 | 0.0000000 | 1307.5802900 | 1307.5802179 |
| 3679: 56   | 17         | 39        | 1            | 57 17 40 0   |
| -0.0004767 | -0.0004000 | 0.0000000 | 1307.8396600 | 1307.8401367 |
| 3680: 55   | 17         | 38        | 1            | 56 17 39 0   |
| -0.0002136 | -0.0004000 | 0.0000000 | 1308.0998100 | 1308.1000236 |
| 3681: 53   | 17         | 36        | 1            | 54 17 37 0   |
| 0.0001448  | -0.0004000 | 0.0000000 | 1308.6198400 | 1308.6196952 |
| 3682: 52   | 17         | 35        | 1            | 53 17 36 0   |
| 0.0003633  | -0.0004000 | 0.0000000 | 1308.8798400 | 1308.8794767 |
| 3683: 51   | 17         | 34        | 1            | 52 17 35 0   |
| 0.0001001  | -0.0004000 | 0.0000000 | 1309.1393200 | 1309.1392199 |
| 3684: 48   | 17         | 31        | 1            | 49 17 32 0   |
| 0.0000471  | -0.0004000 | 0.0000000 | 1309.9182500 | 1309.9182029 |
| 3685: 44   | 17         | 27        | 1            | 45 17 28 0   |
| 0.0002087  | -0.0004000 | 0.0000000 | 1310.9564200 | 1310.9562113 |
| 3686: 43   | 17         | 26        | 1            | 44 17 27 0   |
| 0.0001609  | -0.0004000 | 0.0000000 | 1311.2157500 | 1311.2155891 |
| 3687: 42   | 17         | 25        | 1            | 43 17 26 0   |
| 0.0002762  | -0.0004000 | 0.0000000 | 1311.4751900 | 1311.4749138 |
| 3688: 41   | 17         | 24        | 1            | 42 17 25 0   |
| 0.0001361  | -0.0004000 | 0.0000000 | 1311.7343200 | 1311.7341839 |
| 3689: 39   | 17         | 22        | 1            | 40 17 23 0   |
| 0.0004763  | -0.0004000 | 0.0000000 | 1312.2530300 | 1312.2525537 |
| 3690: 30   | 17         | 13        | 1            | 31 17 14 0   |
| 0.0005686  | -0.0004000 | 0.0000000 | 1314.5826500 | 1314.5820814 |
| 3691: 29   | 17         | 12        | 1            | 30 17 13 0   |
| 0.0003717  | -0.0004000 | 0.0000000 | 1314.8409400 | 1314.8405683 |
| 3692: 28   | 17         | 11        | 1            | 29 17 12 0   |
| -0.0001591 | -0.0004000 | 0.0000000 | 1315.0988200 | 1315.0989791 |
| 3693: 27   | 17         | 10        | 1            | 28 17 11 0   |
| 0.0000976  | -0.0004000 | 0.0000000 | 1315.3574100 | 1315.3573124 |
| 3694: 26   | 17         | 9         | 1            | 27 17 10 0   |
| 0.0006335  | -0.0004000 | 0.0000000 | 1315.6162000 | 1315.6155665 |
| 3695: 25   | 17         | 8         | 1            | 26 17 9 0    |
| 0.0001703  | -0.0004000 | 0.0000000 | 1315.8739100 | 1315.8737397 |
| 3696: 19   | 17         | 2         | 1            | 18 17 1 0    |
| 0.0001327  | -0.0004000 | 0.0000000 | 1327.3810900 | 1327.3809573 |
| 3697: 20   | 17         | 3         | 1            | 19 17 2 0    |
| -0.0003334 | -0.0004000 | 0.0000000 | 1327.6332800 | 1327.6336134 |
| 3698: 21   | 17         | 4         | 1            | 20 17 3 0    |
| -0.0001600 | -0.0004000 | 0.0000000 | 1327.8859500 | 1327.8861100 |
| 3699: 22   | 17         | 5         | 1            | 21 17 4 0    |
| 0.0005648  | -0.0004000 | 0.0000000 | 1328.1390100 | 1328.1384452 |
| 3700: 23   | 17         | 6         | 1            | 22 17 5 0    |
| -0.0001874 | -0.0004000 | 0.0000000 | 1328.3904300 | 1328.3906174 |
| 3701: 24   | 17         | 7         | 1            | 23 17 6 0    |
| 0.0002552  | -0.0004000 | 0.0000000 | 1328.6428800 | 1328.6426248 |
| 3702: 25   | 17         | 8         | 1            | 24 17 7 0    |
| -0.0000758 | -0.0004000 | 0.0000000 | 1328.8943900 | 1328.8944658 |

|       |            |            |           |   |    |    |    |   |              |              |
|-------|------------|------------|-----------|---|----|----|----|---|--------------|--------------|
| 3703: | 26         | 17         | 9         | 1 | 25 | 17 | 8  | 0 | 1329.1465600 | 1329.1461385 |
|       | 0.0004215  | -0.0004000 | 0.0000000 |   |    |    |    |   |              |              |
| 3704: | 32         | 17         | 15        | 1 | 31 | 17 | 14 | 0 | 1330.6522700 | 1330.6525438 |
|       | -0.0002738 | -0.0004000 | 0.0000000 |   |    |    |    |   |              |              |
| 3705: | 33         | 17         | 16        | 1 | 32 | 17 | 15 | 0 | 1330.9025300 | 1330.9029899 |
|       | -0.0004599 | -0.0004000 | 0.0000000 |   |    |    |    |   |              |              |
| 3706: | 34         | 17         | 17        | 1 | 33 | 17 | 16 | 0 | 1331.1530100 | 1331.1532536 |
|       | -0.0002436 | -0.0004000 | 0.0000000 |   |    |    |    |   |              |              |
| 3707: | 42         | 17         | 25        | 1 | 41 | 17 | 24 | 0 | 1333.1485500 | 1333.1485863 |
|       | -0.0000363 | -0.0004000 | 0.0000000 |   |    |    |    |   |              |              |
| 3708: | 48         | 17         | 31        | 1 | 47 | 17 | 30 | 0 | 1334.6365200 | 1334.6367996 |
|       | -0.0002796 | -0.0004000 | 0.0000000 |   |    |    |    |   |              |              |
| 3709: | 49         | 17         | 32        | 1 | 48 | 17 | 31 | 0 | 1334.8838700 | 1334.8841125 |
|       | -0.0002425 | -0.0004000 | 0.0000000 |   |    |    |    |   |              |              |
| 3710: | 50         | 17         | 33        | 1 | 49 | 17 | 32 | 0 | 1335.1307400 | 1335.1312141 |
|       | -0.0004741 | -0.0004000 | 0.0000000 |   |    |    |    |   |              |              |
| 3711: | 59         | 17         | 42        | 1 | 58 | 17 | 41 | 0 | 1337.3453600 | 1337.3453041 |
|       | 0.0000559  | -0.0004000 | 0.0000000 |   |    |    |    |   |              |              |
| 3712: | 60         | 17         | 43        | 1 | 59 | 17 | 42 | 0 | 1337.5904200 | 1337.5901876 |
|       | 0.0002324  | -0.0004000 | 0.0000000 |   |    |    |    |   |              |              |
| 3713: | 62         | 17         | 45        | 1 | 61 | 17 | 44 | 0 | 1338.0796000 | 1338.0792553 |
|       | 0.0003447  | -0.0004000 | 0.0000000 |   |    |    |    |   |              |              |
| 3714: | 63         | 17         | 46        | 1 | 62 | 17 | 45 | 0 | 1338.3234300 | 1338.3234358 |
|       | -0.0000058 | -0.0004000 | 0.0000000 |   |    |    |    |   |              |              |
| 3715: | 64         | 17         | 47        | 1 | 63 | 17 | 46 | 0 | 1338.5676600 | 1338.5673779 |
|       | 0.0002821  | -0.0004000 | 0.0000000 |   |    |    |    |   |              |              |
| 3716: | 65         | 17         | 48        | 1 | 64 | 17 | 47 | 0 | 1338.8118300 | 1338.8110797 |
|       | 0.0007503  | -0.0004000 | 0.0000000 |   |    |    |    |   |              |              |
| 3717: | 76         | 17         | 60        | 1 | 77 | 17 | 61 | 0 | 1302.6380100 | 1302.6378323 |
|       | 0.0001777  | -0.0004000 | 0.0000000 |   |    |    |    |   |              |              |
| 3718: | 75         | 17         | 59        | 1 | 76 | 17 | 60 | 0 | 1302.8982900 | 1302.8980532 |
|       | 0.0002368  | -0.0004000 | 0.0000000 |   |    |    |    |   |              |              |
| 3719: | 74         | 17         | 58        | 1 | 75 | 17 | 59 | 0 | 1303.1587000 | 1303.1582725 |
|       | 0.0004275  | -0.0004000 | 0.0000000 |   |    |    |    |   |              |              |
| 3720: | 72         | 17         | 56        | 1 | 73 | 17 | 57 | 0 | 1303.6786500 | 1303.6786998 |
|       | -0.0000498 | -0.0004000 | 0.0000000 |   |    |    |    |   |              |              |
| 3721: | 67         | 17         | 51        | 1 | 68 | 17 | 52 | 0 | 1304.9794400 | 1304.9796293 |
|       | -0.0001893 | -0.0004000 | 0.0000000 |   |    |    |    |   |              |              |
| 3722: | 66         | 17         | 50        | 1 | 67 | 17 | 51 | 0 | 1305.2398900 | 1305.2397787 |
|       | 0.0001113  | -0.0004000 | 0.0000000 |   |    |    |    |   |              |              |
| 3723: | 64         | 17         | 48        | 1 | 65 | 17 | 49 | 0 | 1305.7596600 | 1305.7600283 |
|       | -0.0003683 | -0.0004000 | 0.0000000 |   |    |    |    |   |              |              |
| 3724: | 63         | 17         | 47        | 1 | 64 | 17 | 48 | 0 | 1306.0194600 | 1306.0201254 |
|       | -0.0006654 | -0.0004000 | 0.0000000 |   |    |    |    |   |              |              |
| 3725: | 62         | 17         | 46        | 1 | 63 | 17 | 47 | 0 | 1306.2796900 | 1306.2802018 |
|       | -0.0005118 | -0.0004000 | 0.0000000 |   |    |    |    |   |              |              |
| 3726: | 61         | 17         | 45        | 1 | 62 | 17 | 46 | 0 | 1306.5406900 | 1306.5402559 |
|       | 0.0004341  | -0.0004000 | 0.0000000 |   |    |    |    |   |              |              |
| 3727: | 60         | 17         | 44        | 1 | 61 | 17 | 45 | 0 | 1306.8006700 | 1306.8002862 |
|       | 0.0003838  | -0.0004000 | 0.0000000 |   |    |    |    |   |              |              |
| 3728: | 58         | 17         | 42        | 1 | 59 | 17 | 43 | 0 | 1307.3206800 | 1307.3202688 |
|       | 0.0004112  | -0.0004000 | 0.0000000 |   |    |    |    |   |              |              |
| 3729: | 57         | 17         | 41        | 1 | 58 | 17 | 42 | 0 | 1307.5802900 | 1307.5802179 |
|       | 0.0000721  | -0.0004000 | 0.0000000 |   |    |    |    |   |              |              |
| 3730: | 56         | 17         | 40        | 1 | 57 | 17 | 41 | 0 | 1307.8396600 | 1307.8401367 |
|       | -0.0004767 | -0.0004000 | 0.0000000 |   |    |    |    |   |              |              |
| 3731: | 55         | 17         | 39        | 1 | 56 | 17 | 40 | 0 | 1308.0998100 | 1308.1000236 |
|       | -0.0002136 | -0.0004000 | 0.0000000 |   |    |    |    |   |              |              |
| 3732: | 53         | 17         | 37        | 1 | 54 | 17 | 38 | 0 | 1308.6198400 | 1308.6196952 |
|       | 0.0001448  | -0.0004000 | 0.0000000 |   |    |    |    |   |              |              |
| 3733: | 52         | 17         | 36        | 1 | 53 | 17 | 37 | 0 | 1308.8798400 | 1308.8794767 |
|       | 0.0003633  | -0.0004000 | 0.0000000 |   |    |    |    |   |              |              |
| 3734: | 51         | 17         | 35        | 1 | 52 | 17 | 36 | 0 | 1309.1393200 | 1309.1392199 |
|       | 0.0001001  | -0.0004000 | 0.0000000 |   |    |    |    |   |              |              |
| 3735: | 48         | 17         | 32        | 1 | 49 | 17 | 33 | 0 | 1309.9182500 | 1309.9182029 |



|       |            |            |           |   |    |    |    |   |              |              |
|-------|------------|------------|-----------|---|----|----|----|---|--------------|--------------|
| 3768: | 62         | 18         | 44        | 1 | 63 | 18 | 45 | 0 | 1305.9176900 | 1305.9174747 |
|       | 0.0002153  | -0.0004000 | 0.0000000 |   |    |    |    |   |              |              |
| 3769: | 61         | 18         | 43        | 1 | 62 | 18 | 44 | 0 | 1306.1774300 | 1306.1775334 |
|       | -0.0001034 | -0.0004000 | 0.0000000 |   |    |    |    |   |              |              |
| 3770: | 60         | 18         | 42        | 1 | 61 | 18 | 43 | 0 | 1306.4374600 | 1306.4375693 |
|       | -0.0001093 | -0.0004000 | 0.0000000 |   |    |    |    |   |              |              |
| 3771: | 59         | 18         | 41        | 1 | 60 | 18 | 42 | 0 | 1306.6973800 | 1306.6975808 |
|       | -0.0002008 | -0.0004000 | 0.0000000 |   |    |    |    |   |              |              |
| 3772: | 48         | 18         | 30        | 1 | 49 | 18 | 31 | 0 | 1309.5550800 | 1309.5556438 |
|       | -0.0005638 | -0.0004000 | 0.0000000 |   |    |    |    |   |              |              |
| 3773: | 47         | 18         | 29        | 1 | 48 | 18 | 30 | 0 | 1309.8144800 | 1309.8152383 |
|       | -0.0007583 | -0.0004000 | 0.0000000 |   |    |    |    |   |              |              |
| 3774: | 46         | 18         | 28        | 1 | 47 | 18 | 29 | 0 | 1310.0747000 | 1310.0747876 |
|       | -0.0000876 | -0.0004000 | 0.0000000 |   |    |    |    |   |              |              |
| 3775: | 45         | 18         | 27        | 1 | 46 | 18 | 28 | 0 | 1310.3344700 | 1310.3342900 |
|       | 0.0001800  | -0.0004000 | 0.0000000 |   |    |    |    |   |              |              |
| 3776: | 44         | 18         | 26        | 1 | 45 | 18 | 27 | 0 | 1310.5935700 | 1310.5937440 |
|       | -0.0001740 | -0.0004000 | 0.0000000 |   |    |    |    |   |              |              |
| 3777: | 40         | 18         | 22        | 1 | 41 | 18 | 23 | 0 | 1311.6311400 | 1311.6310426 |
|       | 0.0000974  | -0.0004000 | 0.0000000 |   |    |    |    |   |              |              |
| 3778: | 39         | 18         | 21        | 1 | 40 | 18 | 22 | 0 | 1311.8901900 | 1311.8902297 |
|       | -0.0000397 | -0.0004000 | 0.0000000 |   |    |    |    |   |              |              |
| 3779: | 22         | 18         | 4         | 1 | 23 | 18 | 5  | 0 | 1316.2864600 | 1316.2861586 |
|       | 0.0003014  | -0.0004000 | 0.0000000 |   |    |    |    |   |              |              |
| 3780: | 21         | 18         | 3         | 1 | 22 | 18 | 4  | 0 | 1316.5439300 | 1316.5440455 |
|       | -0.0001155 | -0.0004000 | 0.0000000 |   |    |    |    |   |              |              |
| 3781: | 20         | 18         | 2         | 1 | 21 | 18 | 3  | 0 | 1316.8015900 | 1316.8018445 |
|       | -0.0002545 | -0.0004000 | 0.0000000 |   |    |    |    |   |              |              |
| 3782: | 19         | 18         | 1         | 1 | 20 | 18 | 2  | 0 | 1317.0592900 | 1317.0595538 |
|       | -0.0002638 | -0.0004000 | 0.0000000 |   |    |    |    |   |              |              |
| 3783: | 18         | 18         | 0         | 1 | 19 | 18 | 1  | 0 | 1317.3166300 | 1317.3171718 |
|       | -0.0005418 | -0.0004000 | 0.0000000 |   |    |    |    |   |              |              |
| 3784: | 28         | 18         | 10        | 1 | 27 | 18 | 9  | 0 | 1329.2918600 | 1329.2911010 |
|       | 0.0007590  | -0.0004000 | 0.0000000 |   |    |    |    |   |              |              |
| 3785: | 29         | 18         | 11        | 1 | 28 | 18 | 10 | 0 | 1329.5426800 | 1329.5423377 |
|       | 0.0003423  | -0.0004000 | 0.0000000 |   |    |    |    |   |              |              |
| 3786: | 30         | 18         | 12        | 1 | 29 | 18 | 11 | 0 | 1329.7934900 | 1329.7933986 |
|       | 0.0000914  | -0.0004000 | 0.0000000 |   |    |    |    |   |              |              |
| 3787: | 33         | 18         | 15        | 1 | 32 | 18 | 14 | 0 | 1330.5456500 | 1330.5455091 |
|       | 0.0001409  | -0.0004000 | 0.0000000 |   |    |    |    |   |              |              |
| 3788: | 34         | 18         | 16        | 1 | 33 | 18 | 15 | 0 | 1330.7960200 | 1330.7958491 |
|       | 0.0001709  | -0.0004000 | 0.0000000 |   |    |    |    |   |              |              |
| 3789: | 35         | 18         | 17        | 1 | 34 | 18 | 16 | 0 | 1331.0461600 | 1331.0460043 |
|       | 0.0001557  | -0.0004000 | 0.0000000 |   |    |    |    |   |              |              |
| 3790: | 36         | 18         | 18        | 1 | 35 | 18 | 17 | 0 | 1331.2962200 | 1331.2959730 |
|       | 0.0002470  | -0.0004000 | 0.0000000 |   |    |    |    |   |              |              |
| 3791: | 39         | 18         | 21        | 1 | 38 | 18 | 20 | 0 | 1332.0449800 | 1332.0447408 |
|       | 0.0002392  | -0.0004000 | 0.0000000 |   |    |    |    |   |              |              |
| 3792: | 40         | 18         | 22        | 1 | 39 | 18 | 21 | 0 | 1332.2940000 | 1332.2939446 |
|       | 0.0000554  | -0.0004000 | 0.0000000 |   |    |    |    |   |              |              |
| 3793: | 41         | 18         | 23        | 1 | 40 | 18 | 22 | 0 | 1332.5432300 | 1332.5429525 |
|       | 0.0002775  | -0.0004000 | 0.0000000 |   |    |    |    |   |              |              |
| 3794: | 44         | 18         | 26        | 1 | 43 | 18 | 25 | 0 | 1333.2882600 | 1333.2887826 |
|       | -0.0005226 | -0.0004000 | 0.0000000 |   |    |    |    |   |              |              |
| 3795: | 45         | 18         | 27        | 1 | 44 | 18 | 26 | 0 | 1333.5365600 | 1333.5369885 |
|       | -0.0004285 | -0.0004000 | 0.0000000 |   |    |    |    |   |              |              |
| 3796: | 46         | 18         | 28        | 1 | 45 | 18 | 27 | 0 | 1333.7846900 | 1333.7849891 |
|       | -0.0002991 | -0.0004000 | 0.0000000 |   |    |    |    |   |              |              |
| 3797: | 47         | 18         | 29        | 1 | 46 | 18 | 28 | 0 | 1334.0326700 | 1334.0327827 |
|       | -0.0001127 | -0.0004000 | 0.0000000 |   |    |    |    |   |              |              |
| 3798: | 52         | 18         | 34        | 1 | 51 | 18 | 33 | 0 | 1335.2686100 | 1335.2685767 |
|       | 0.0000333  | -0.0004000 | 0.0000000 |   |    |    |    |   |              |              |
| 3799: | 53         | 18         | 35        | 1 | 52 | 18 | 34 | 0 | 1335.5151200 | 1335.5150873 |
|       | 0.0000327  | -0.0004000 | 0.0000000 |   |    |    |    |   |              |              |
| 3800: | 61         | 18         | 43        | 1 | 60 | 18 | 42 | 0 | 1337.4788800 | 1337.4790668 |

|            |            |            |   |                           |
|------------|------------|------------|---|---------------------------|
| -0.0001868 | -0.0004000 | 0.0000000  |   |                           |
| 3801: 64   | 18 46      | 1 63 18 45 | 0 | 1338.2119300 1338.2117132 |
| 0.0002168  | -0.0004000 | 0.0000000  |   |                           |
| 3802: 66   | 18 48      | 1 65 18 47 | 0 | 1338.6987600 1338.6989352 |
| -0.0001752 | -0.0004000 | 0.0000000  |   |                           |
| 3803: 68   | 18 50      | 1 67 18 49 | 0 | 1339.1850600 1339.1851709 |
| -0.0001109 | -0.0004000 | 0.0000000  |   |                           |
| 3804: 69   | 18 51      | 1 68 18 50 | 0 | 1339.4278800 1339.4279137 |
| -0.0000337 | -0.0004000 | 0.0000000  |   |                           |
| 3805: 70   | 18 52      | 1 69 18 51 | 0 | 1339.6707100 1339.6704038 |
| 0.0003062  | -0.0004000 | 0.0000000  |   |                           |
| 3806: 72   | 18 54      | 1 71 18 53 | 0 | 1340.1543200 1340.1546172 |
| -0.0002972 | -0.0004000 | 0.0000000  |   |                           |
| 3807: 73   | 18 55      | 1 72 18 54 | 0 | 1340.3962200 1340.3963364 |
| -0.0001164 | -0.0004000 | 0.0000000  |   |                           |
| 3808: 62   | 18 45      | 1 63 18 46 | 0 | 1305.9176900 1305.9174747 |
| 0.0002153  | -0.0004000 | 0.0000000  |   |                           |
| 3809: 61   | 18 44      | 1 62 18 45 | 0 | 1306.1774300 1306.1775334 |
| -0.0001034 | -0.0004000 | 0.0000000  |   |                           |
| 3810: 60   | 18 43      | 1 61 18 44 | 0 | 1306.4374600 1306.4375693 |
| -0.0001093 | -0.0004000 | 0.0000000  |   |                           |
| 3811: 59   | 18 42      | 1 60 18 43 | 0 | 1306.6973800 1306.6975808 |
| -0.0002008 | -0.0004000 | 0.0000000  |   |                           |
| 3812: 48   | 18 31      | 1 49 18 32 | 0 | 1309.5550800 1309.5556438 |
| -0.0005638 | -0.0004000 | 0.0000000  |   |                           |
| 3813: 47   | 18 30      | 1 48 18 31 | 0 | 1309.8144800 1309.8152383 |
| -0.0007583 | -0.0004000 | 0.0000000  |   |                           |
| 3814: 46   | 18 29      | 1 47 18 30 | 0 | 1310.0747000 1310.0747876 |
| -0.0000876 | -0.0004000 | 0.0000000  |   |                           |
| 3815: 45   | 18 28      | 1 46 18 29 | 0 | 1310.3344700 1310.3342900 |
| 0.0001800  | -0.0004000 | 0.0000000  |   |                           |
| 3816: 44   | 18 27      | 1 45 18 28 | 0 | 1310.5935700 1310.5937440 |
| -0.0001740 | -0.0004000 | 0.0000000  |   |                           |
| 3817: 40   | 18 23      | 1 41 18 24 | 0 | 1311.6311400 1311.6310426 |
| 0.0000974  | -0.0004000 | 0.0000000  |   |                           |
| 3818: 39   | 18 22      | 1 40 18 23 | 0 | 1311.8901900 1311.8902297 |
| -0.0000397 | -0.0004000 | 0.0000000  |   |                           |
| 3819: 22   | 18 5       | 1 23 18 6  | 0 | 1316.2864600 1316.2861586 |
| 0.0003014  | -0.0004000 | 0.0000000  |   |                           |
| 3820: 21   | 18 4       | 1 22 18 5  | 0 | 1316.5439300 1316.5440455 |
| -0.0001155 | -0.0004000 | 0.0000000  |   |                           |
| 3821: 20   | 18 3       | 1 21 18 4  | 0 | 1316.8015900 1316.8018445 |
| -0.0002545 | -0.0004000 | 0.0000000  |   |                           |
| 3822: 19   | 18 2       | 1 20 18 3  | 0 | 1317.0592900 1317.0595538 |
| -0.0002638 | -0.0004000 | 0.0000000  |   |                           |
| 3823: 18   | 18 1       | 1 19 18 2  | 0 | 1317.3166300 1317.3171718 |
| -0.0005418 | -0.0004000 | 0.0000000  |   |                           |
| 3824: 28   | 18 11      | 1 27 18 10 | 0 | 1329.2918600 1329.2911010 |
| 0.0007590  | -0.0004000 | 0.0000000  |   |                           |
| 3825: 29   | 18 12      | 1 28 18 11 | 0 | 1329.5426800 1329.5423377 |
| 0.0003423  | -0.0004000 | 0.0000000  |   |                           |
| 3826: 30   | 18 13      | 1 29 18 12 | 0 | 1329.7934900 1329.7933986 |
| 0.0000914  | -0.0004000 | 0.0000000  |   |                           |
| 3827: 33   | 18 16      | 1 32 18 15 | 0 | 1330.5456500 1330.5455091 |
| 0.0001409  | -0.0004000 | 0.0000000  |   |                           |
| 3828: 34   | 18 17      | 1 33 18 16 | 0 | 1330.7960200 1330.7958491 |
| 0.0001709  | -0.0004000 | 0.0000000  |   |                           |
| 3829: 35   | 18 18      | 1 34 18 17 | 0 | 1331.0461600 1331.0460043 |
| 0.0001557  | -0.0004000 | 0.0000000  |   |                           |
| 3830: 36   | 18 19      | 1 35 18 18 | 0 | 1331.2962200 1331.2959730 |
| 0.0002470  | -0.0004000 | 0.0000000  |   |                           |
| 3831: 39   | 18 22      | 1 38 18 21 | 0 | 1332.0449800 1332.0447408 |
| 0.0002392  | -0.0004000 | 0.0000000  |   |                           |
| 3832: 40   | 18 23      | 1 39 18 22 | 0 | 1332.2940000 1332.2939446 |
| 0.0000554  | -0.0004000 | 0.0000000  |   |                           |

|       |            |            |           |   |    |    |    |   |              |              |
|-------|------------|------------|-----------|---|----|----|----|---|--------------|--------------|
| 3833: | 41         | 18         | 24        | 1 | 40 | 18 | 23 | 0 | 1332.5432300 | 1332.5429525 |
|       | 0.0002775  | -0.0004000 | 0.0000000 |   |    |    |    |   |              |              |
| 3834: | 44         | 18         | 27        | 1 | 43 | 18 | 26 | 0 | 1333.2882600 | 1333.2887826 |
|       | -0.0005226 | -0.0004000 | 0.0000000 |   |    |    |    |   |              |              |
| 3835: | 45         | 18         | 28        | 1 | 44 | 18 | 27 | 0 | 1333.5365600 | 1333.5369885 |
|       | -0.0004285 | -0.0004000 | 0.0000000 |   |    |    |    |   |              |              |
| 3836: | 46         | 18         | 29        | 1 | 45 | 18 | 28 | 0 | 1333.7846900 | 1333.7849891 |
|       | -0.0002991 | -0.0004000 | 0.0000000 |   |    |    |    |   |              |              |
| 3837: | 47         | 18         | 30        | 1 | 46 | 18 | 29 | 0 | 1334.0326700 | 1334.0327827 |
|       | -0.0001127 | -0.0004000 | 0.0000000 |   |    |    |    |   |              |              |
| 3838: | 52         | 18         | 35        | 1 | 51 | 18 | 34 | 0 | 1335.2686100 | 1335.2685767 |
|       | 0.0000333  | -0.0004000 | 0.0000000 |   |    |    |    |   |              |              |
| 3839: | 53         | 18         | 36        | 1 | 52 | 18 | 35 | 0 | 1335.5151200 | 1335.5150873 |
|       | 0.0000327  | -0.0004000 | 0.0000000 |   |    |    |    |   |              |              |
| 3840: | 61         | 18         | 44        | 1 | 60 | 18 | 43 | 0 | 1337.4788800 | 1337.4790668 |
|       | -0.0001868 | -0.0004000 | 0.0000000 |   |    |    |    |   |              |              |
| 3841: | 64         | 18         | 47        | 1 | 63 | 18 | 46 | 0 | 1338.2119300 | 1338.2117132 |
|       | 0.0002168  | -0.0004000 | 0.0000000 |   |    |    |    |   |              |              |
| 3842: | 66         | 18         | 49        | 1 | 65 | 18 | 48 | 0 | 1338.6987600 | 1338.6989352 |
|       | -0.0001752 | -0.0004000 | 0.0000000 |   |    |    |    |   |              |              |
| 3843: | 68         | 18         | 51        | 1 | 67 | 18 | 50 | 0 | 1339.1850600 | 1339.1851709 |
|       | -0.0001109 | -0.0004000 | 0.0000000 |   |    |    |    |   |              |              |
| 3844: | 69         | 18         | 52        | 1 | 68 | 18 | 51 | 0 | 1339.4278800 | 1339.4279137 |
|       | -0.0000337 | -0.0004000 | 0.0000000 |   |    |    |    |   |              |              |
| 3845: | 70         | 18         | 53        | 1 | 69 | 18 | 52 | 0 | 1339.6707100 | 1339.6704038 |
|       | 0.0003062  | -0.0004000 | 0.0000000 |   |    |    |    |   |              |              |
| 3846: | 72         | 18         | 55        | 1 | 71 | 18 | 54 | 0 | 1340.1543200 | 1340.1546172 |
|       | -0.0002972 | -0.0004000 | 0.0000000 |   |    |    |    |   |              |              |
| 3847: | 73         | 18         | 56        | 1 | 72 | 18 | 55 | 0 | 1340.3962200 | 1340.3963364 |
|       | -0.0001164 | -0.0004000 | 0.0000000 |   |    |    |    |   |              |              |

NORMALIZED DIAGONAL:

|              |              |              |              |              |              |    |  |
|--------------|--------------|--------------|--------------|--------------|--------------|----|--|
| 1            | 5.94235E-002 | 2            | 3.07000E-001 | 3            | 1.65755E-001 | 4  |  |
| 1.11053E-002 | 5            | 6.14779E-003 | 6            | 9.43071E-003 |              |    |  |
| 7            | 9.99722E-001 | 8            | 3.69991E-002 | 9            | 1.00000E+000 | 10 |  |
| 6.65823E-001 | 11           | 1.63893E-002 | 12           | 4.48588E-001 |              |    |  |
| 13           | 1.00000E+000 | 14           | 5.84178E-001 | 15           | 1.00000E+000 | 16 |  |
| 3.44381E-002 | 17           | 2.35777E-002 | 18           | 1.42777E-001 |              |    |  |
| 19           | 8.79036E-002 | 20           | 5.58509E-002 | 21           | 5.40924E-002 | 22 |  |
| 8.79147E-001 | 23           | 1.00000E+000 | 24           | 5.11776E-002 |              |    |  |
| 25           | 2.28713E-001 | 26           | 3.09478E-002 | 27           | 1.00000E+000 |    |  |

MARQUARDT PARAMETER = 0, TRUST EXPANSION = 1.00

NEW PARAMETER (EST. ERROR) -- CHANGE

THIS ITERATION

|                 |       |       |                     |           |
|-----------------|-------|-------|---------------------|-----------|
| 1               | 10000 | A     | 41624.719( 41)      | 0.000     |
| 2               | 20000 | B     | 3997.4064( 77)      | -0.0000   |
| 3               | 30000 | C     | 3641.0583( 62)      | -0.0000   |
| 4               | 200   | -DJ   | -2.50187(103)E-03   |           |
| 0.00000E-03     |       |       |                     |           |
| 5               | 1100  | -DJK  | 0.038844( 85)       | -0.000000 |
| 6               | 2000  | -DK   | -1.65474( 86)       | 0.00000   |
| 7               | 40100 | -delj | -0.33728( 35)E-03   |           |
| -0.00000E-03    |       |       |                     |           |
| 8               | 41000 | -delk | -0.018390(294)      | -0.000000 |
| 9               | 300   | HJ    | 0.697799655( 1)E-09 |           |
| 0.000000000E-09 |       |       |                     |           |
| 10              | 1200  | HJK   | 0.0472( 64)E-06     |           |
| 0.00000E-06     |       |       |                     |           |
| 11              | 2100  | HKJ   | -0.010867(267)E-03  |           |
| 0.000000E-03    |       |       |                     |           |



|                  |       |                |                      |                 |           |           |    |           |           |    |           |   |    |
|------------------|-------|----------------|----------------------|-----------------|-----------|-----------|----|-----------|-----------|----|-----------|---|----|
| 12               | 3000  | HK             | 0.29964(294)E-03     |                 |           |           |    |           |           |    |           |   |    |
| -0.00000E-03     |       |                |                      |                 |           |           |    |           |           |    |           |   |    |
| 13               | 4000  | -LK            | -0.056115839( 0)E-06 |                 |           |           |    |           |           |    |           |   |    |
| 0.000000000E-06  |       |                |                      |                 |           |           |    |           |           |    |           |   |    |
| 14               | 11    | E              | 39739665.71( 67)     | -0.00           |           |           |    |           |           |    |           |   |    |
| 15               | 10011 | A              | 41304.876( 45)       | 0.000           |           |           |    |           |           |    |           |   |    |
| 16               | 20011 | B              | 3996.5222( 77)       | -0.0000         |           |           |    |           |           |    |           |   |    |
| 17               | 30011 | C              | 3638.0062( 63)       | -0.0000         |           |           |    |           |           |    |           |   |    |
| 18               | 211   | -DJ            | -2.51154(102)E-03    |                 |           |           |    |           |           |    |           |   |    |
| -0.00000E-03     |       |                |                      |                 |           |           |    |           |           |    |           |   |    |
| 19               | 1111  | -DJK           | 0.039118( 85)        | -0.000000       |           |           |    |           |           |    |           |   |    |
| 20               | 2011  | -DK            | -1.63802( 89)        | 0.00000         |           |           |    |           |           |    |           |   |    |
| 21               | 40111 | -delj          | -0.34140( 35)E-03    |                 |           |           |    |           |           |    |           |   |    |
| -0.00000E-03     |       |                |                      |                 |           |           |    |           |           |    |           |   |    |
| 22               | 41011 | -delk          | -0.018322(287)       | -0.000000       |           |           |    |           |           |    |           |   |    |
| 23               | 311   | HJ             | 0.697799655( 0)E-09  |                 |           |           |    |           |           |    |           |   |    |
| 0.000000000E-09  |       |                |                      |                 |           |           |    |           |           |    |           |   |    |
| 24               | 1211  | HJK            | 0.0463( 64)E-06      |                 |           |           |    |           |           |    |           |   |    |
| 0.0000E-06       |       |                |                      |                 |           |           |    |           |           |    |           |   |    |
| 25               | 2111  | HKJ            | -0.010847(267)E-03   |                 |           |           |    |           |           |    |           |   |    |
| 0.000000E-03     |       |                |                      |                 |           |           |    |           |           |    |           |   |    |
| 26               | 3011  | HK             | 0.29675(301)E-03     |                 |           |           |    |           |           |    |           |   |    |
| -0.00000E-03     |       |                |                      |                 |           |           |    |           |           |    |           |   |    |
| 27               | 4011  | -LK            | -0.056115839( 0)E-06 |                 |           |           |    |           |           |    |           |   |    |
| 0.000000000E-06  |       |                |                      |                 |           |           |    |           |           |    |           |   |    |
| MICROWAVE AVG =  |       | -0.165567 MHz, | IR AVG =             | -0.00000        |           |           |    |           |           |    |           |   |    |
| MICROWAVE RMS =  |       | 0.555087 MHz,  | IR RMS =             | 0.00033         |           |           |    |           |           |    |           |   |    |
| END OF ITERATION |       | 1 OLD,         | NEW RMS ERROR=       | 0.81942 0.81942 |           |           |    |           |           |    |           |   |    |
| 1                | 2     | -0.373102      | 1                    | 3               | 0.016461  | 1         | 4  | 0.195922  | 1         | 5  | 0.087325  | 1 | 6  |
| -0.452083        | 1     | 7              | 0.279725             | 1               | 8         | 0.086115  | 1  | 9         | 0.000000  |    |           |   |    |
| 1                | 10    | -0.117349      | 1                    | 11              | -0.018267 | 1         | 12 | 0.319349  | 1         | 13 | -0.000000 | 1 | 14 |
| -0.019659        | 1     | 15             | 0.907037             | 1               | 16        | -0.369965 | 1  | 17        | 0.015334  |    |           |   |    |
| 1                | 18    | 0.195205       | 1                    | 19              | 0.086662  | 1         | 20 | -0.431090 | 1         | 21 | 0.277731  | 1 | 22 |
| 0.086286         | 1     | 23             | 0.000000             | 1               | 24        | -0.114976 | 1  | 25        | -0.018563 |    |           |   |    |
| 1                | 26    | 0.310345       | 1                    | 27              | 0.000000  | 2         | 1  | -0.373102 | 2         | 3  | 0.781828  | 2 | 4  |
| -0.690881        | 2     | 5              | -0.565323            | 2               | 6         | 0.410132  | 2  | 7         | -0.424576 |    |           |   |    |
| 2                | 8     | -0.175639      | 2                    | 9               | 0.000000  | 2         | 10 | 0.523849  | 2         | 11 | 0.266432  | 2 | 12 |
| -0.307667        | 2     | 13             | 0.000000             | 2               | 14        | 0.035805  | 2  | 15        | -0.340646 |    |           |   |    |
| 2                | 16    | 0.991510       | 2                    | 17              | 0.779114  | 2         | 18 | -0.689715 | 2         | 19 | -0.562114 | 2 | 20 |
| 0.391409         | 2     | 21             | -0.413844            | 2               | 22        | -0.174587 | 2  | 23        | 0.000000  |    |           |   |    |
| 2                | 24    | 0.515770       | 2                    | 25              | 0.266125  | 2         | 26 | -0.299251 | 2         | 27 | 0.000000  | 3 | 1  |
| 0.016461         | 3     | 2              | 0.781828             | 3               | 4         | -0.515650 | 3  | 5         | -0.537013 |    |           |   |    |
| 3                | 6     | 0.234921       | 3                    | 7               | -0.162596 | 3         | 8  | 0.069771  | 3         | 9  | 0.000000  | 3 | 10 |
| 0.487361         | 3     | 11             | 0.236309             | 3               | 12        | -0.179506 | 3  | 13        | 0.000000  |    |           |   |    |
| 3                | 14    | 0.031379       | 3                    | 15              | 0.012492  | 3         | 16 | 0.774209  | 3         | 17 | 0.993848  | 3 | 18 |
| -0.513396        | 3     | 19             | -0.533866            | 3               | 20        | 0.224499  | 3  | 21        | -0.150115 |    |           |   |    |
| 3                | 22    | 0.071080       | 3                    | 23              | 0.000000  | 3         | 24 | 0.479085  | 3         | 25 | 0.236249  | 3 | 26 |
| -0.174955        | 3     | 27             | 0.000000             | 4               | 1         | 0.195922  | 4  | 2         | -0.690881 |    |           |   |    |
| 4                | 3     | -0.515650      | 4                    | 5               | 0.249802  | 4         | 6  | -0.206045 | 4         | 7  | 0.634084  | 4 | 8  |
| 0.674959         | 4     | 9              | -0.000000            | 4               | 10        | -0.571139 | 4  | 11        | -0.002921 |    |           |   |    |
| 4                | 12    | 0.127716       | 4                    | 13              | -0.000000 | 4         | 14 | -0.019737 | 4         | 15 | 0.173156  | 4 | 16 |
| -0.678571        | 4     | 17             | -0.519475            | 4               | 18        | 0.995931  | 4  | 19        | 0.247074  |    |           |   |    |
| 4                | 20    | -0.193357      | 4                    | 21              | 0.618504  | 4         | 22 | 0.667604  | 4         | 23 | 0.000000  | 4 | 24 |
| -0.563562        | 4     | 25             | -0.001814            | 4               | 26        | 0.121751  | 4  | 27        | 0.000000  |    |           |   |    |
| 5                | 1     | 0.087325       | 5                    | 2               | -0.565323 | 5         | 3  | -0.537013 | 5         | 4  | 0.249802  | 5 | 6  |
| -0.536587        | 5     | 7              | 0.020974             | 5               | 8         | 0.069386  | 5  | 9         | 0.000000  |    |           |   |    |
| 5                | 10    | -0.481261      | 5                    | 11              | -0.819877 | 5         | 12 | 0.501689  | 5         | 13 | -0.000000 | 5 | 14 |
| -0.023857        | 5     | 15             | 0.096907             | 5               | 16        | -0.567537 | 5  | 17        | -0.532732 |    |           |   |    |

5 18 0.256330 5 19 0.997000 5 20 -0.518211 5 21 0.025219 5 22  
0.074555 5 23 0.000000 5 24 -0.480576 5 25 -0.817260  
5 26 0.490787 5 27 0.000000 6 1 -0.452083 6 2 0.410132 6 3  
0.234921 6 4 -0.206045 6 5 -0.536587 6 7 -0.131284  
6 8 -0.078703 6 9 -0.000000 6 10 0.349147 6 11 0.370630 6 12  
-0.958870 6 13 0.000000 6 14 0.036165 6 15 -0.502104  
6 16 0.415943 6 17 0.232732 6 18 -0.212435 6 19 -0.529805 6 20  
0.987249 6 21 -0.138507 6 22 -0.081357 6 23 0.000000  
6 24 0.348370 6 25 0.362608 6 26 -0.948787 6 27 0.000000 7 1  
0.279725 7 2 -0.424576 7 3 -0.162596 7 4 0.634084  
7 5 0.020974 7 6 -0.131284 7 8 0.301109 7 9 0.000000 7 10  
-0.460753 7 11 0.166424 7 12 0.054908 7 13 -0.000000  
7 14 -0.025429 7 15 0.249569 7 16 -0.411889 7 17 -0.166222 7 18  
0.620721 7 19 0.019225 7 20 -0.122371 7 21 0.984945  
7 22 0.286031 7 23 0.000000 7 24 -0.451809 7 25 0.166355 7 26  
0.051448 7 27 0.000000 8 1 0.086115 8 2 -0.175639  
8 3 0.069771 8 4 0.674959 8 5 0.069386 8 6 -0.078703 8 7  
0.301109 8 9 -0.000000 8 10 -0.090978 8 11 -0.100928  
8 12 0.069638 8 13 -0.000000 8 14 0.013666 8 15 0.072954 8 16  
-0.174317 8 17 0.062525 8 18 0.680712 8 19 0.068348  
8 20 -0.071552 8 21 0.304915 8 22 0.997948 8 23 0.000000 8 24  
-0.094544 8 25 -0.097734 8 26 0.064375 8 27 0.000000  
9 1 0.000000 9 2 0.000000 9 3 0.000000 9 4 -0.000000 9 5  
0.000000 9 6 -0.000000 9 7 0.000000 9 8 -0.000000  
9 10 -0.000000 9 11 -0.000000 9 12 0.000000 9 13 -0.000000 9 14  
0.000000 9 15 -0.000000 9 16 -0.000000 9 17 -0.000000  
9 18 -0.000000 9 19 0.000000 9 20 -0.000000 9 21 0.000000 9 22  
-0.000000 9 23 0.000000 9 24 -0.000000 9 25 -0.000000  
9 26 0.000000 9 27 0.000000 10 1 -0.117349 10 2 0.523849 10 3  
0.487361 10 4 -0.571139 10 5 -0.481261 10 6 0.349147  
10 7 -0.460753 10 8 -0.090978 10 9 -0.000000 10 11 -0.021102 10 12  
-0.226637 10 13 0.000000 10 14 0.018717 10 15 -0.113145  
10 16 0.516972 10 17 0.487597 10 18 -0.567475 10 19 -0.478479 10 20  
0.334426 10 21 -0.449211 10 22 -0.085127 10 23 0.000000  
10 24 0.993028 10 25 -0.022682 10 26 -0.219951 10 27 0.000000 11 1  
-0.018267 11 2 0.266432 11 3 0.236309 11 4 -0.002921  
11 5 -0.819877 11 6 0.370630 11 7 0.166424 11 8 -0.100928 11 9  
-0.000000 11 10 -0.021102 11 12 -0.428579 11 13 0.000000  
11 14 0.024673 11 15 -0.039701 11 16 0.271224 11 17 0.232369 11 18  
-0.010533 11 19 -0.817527 11 20 0.363257 11 21 0.157007  
11 22 -0.108668 11 23 0.000000 11 24 -0.019914 11 25 0.998140 11 26  
-0.422893 11 27 0.000000 12 1 0.319349 12 2 -0.307667  
12 3 -0.179506 12 4 0.127716 12 5 0.501689 12 6 -0.958870 12 7  
0.054908 12 8 0.069638 12 9 0.000000 12 10 -0.226637  
12 11 -0.428579 12 13 -0.000000 12 14 -0.027726 12 15 0.386166 12 16  
-0.315737 12 17 -0.177492 12 18 0.135010 12 19 0.497586  
12 20 -0.954889 12 21 0.064008 12 22 0.073003 12 23 0.000000 12 24  
-0.229222 12 25 -0.421607 12 26 0.994504 12 27 0.000000  
13 1 -0.000000 13 2 0.000000 13 3 0.000000 13 4 -0.000000 13 5  
-0.000000 13 6 0.000000 13 7 -0.000000 13 8 -0.000000  
13 9 -0.000000 13 10 0.000000 13 11 0.000000 13 12 -0.000000 13 14  
-0.000000 13 15 0.000000 13 16 0.000000 13 17 0.000000  
13 18 -0.000000 13 19 -0.000000 13 20 -0.000000 13 21 -0.000000 13 22  
-0.000000 13 23 0.000000 13 24 0.000000 13 25 0.000000  
13 26 0.000000 13 27 0.000000 14 1 -0.019659 14 2 0.035805 14 3  
0.031379 14 4 -0.019737 14 5 -0.023857 14 6 0.036165  
14 7 -0.025429 14 8 0.013666 14 9 0.000000 14 10 0.018717 14 11  
0.024673 14 12 -0.027726 14 13 -0.000000 14 15 -0.289072  
14 16 -0.014779 14 17 -0.016308 14 18 0.018798 14 19 0.016833 14 20  
0.097833 14 21 -0.009172 14 22 0.015194 14 23 0.000000  
14 24 -0.025079 14 25 0.004262 14 26 -0.055468 14 27 0.000000 15 1  
0.907037 15 2 -0.340646 15 3 0.012492 15 4 0.173156  
15 5 0.096907 15 6 -0.502104 15 7 0.249569 15 8 0.072954 15 9  
-0.000000 15 10 -0.113145 15 11 -0.039701 15 12 0.386166  
15 13 0.000000 15 14 -0.289072 15 16 -0.337260 15 17 0.024179 15 18

0.170145 15 19 0.082425 15 20 -0.539208 15 21 0.254885  
15 22 0.073936 15 23 0.000000 15 24 -0.100623 15 25 -0.029302 15 26  
0.408017 15 27 0.000000 16 1 -0.369965 16 2 0.991510  
16 3 0.774209 16 4 -0.678571 16 5 -0.567537 16 6 0.415943 16 7  
-0.411889 16 8 -0.174317 16 9 -0.000000 16 10 0.516972  
16 11 0.271224 16 12 -0.315737 16 13 0.000000 16 14 -0.014779 16 15  
-0.337260 16 17 0.766515 16 18 -0.686043 16 19 -0.569011  
16 20 0.400053 16 21 -0.420877 16 22 -0.175274 16 23 0.000000 16 24  
0.517345 16 25 0.272056 16 26 -0.309194 16 27 0.000000  
17 1 0.015334 17 2 0.779114 17 3 0.993848 17 4 -0.519475 17 5  
-0.532732 17 6 0.232732 17 7 -0.166222 17 8 0.062525  
17 9 -0.000000 17 10 0.487597 17 11 0.232369 17 12 -0.177492 17 13  
0.000000 17 14 -0.016308 17 15 0.024179 17 16 0.766515  
17 18 -0.518302 17 19 -0.531789 17 20 0.219507 17 21 -0.141081 17 22  
0.065169 17 23 0.000000 17 24 0.481376 17 25 0.233397  
17 26 -0.171698 17 27 0.000000 18 1 0.195205 18 2 -0.689715 18 3  
-0.513396 18 4 0.995931 18 5 0.256330 18 6 -0.212435  
18 7 0.620721 18 8 0.680712 18 9 -0.000000 18 10 -0.567475 18 11  
-0.010533 18 12 0.135010 18 13 -0.000000 18 14 0.018798  
18 15 0.170145 18 16 -0.686043 18 17 -0.518302 18 19 0.256382 18 20  
-0.200405 18 21 0.614370 18 22 0.676753 18 23 0.000000  
18 24 -0.566537 18 25 -0.009539 18 26 0.129320 18 27 0.000000 19 1  
0.086662 19 2 -0.562114 19 3 -0.533866 19 4 0.247074  
19 5 0.997000 19 6 -0.529805 19 7 0.019225 19 8 0.068348 19 9  
0.000000 19 10 -0.478479 19 11 -0.817527 19 12 0.497586  
19 13 -0.000000 19 14 0.016833 19 15 0.082425 19 16 -0.569011 19 17  
-0.531789 19 18 0.256382 19 20 -0.511086 19 21 0.025750  
19 22 0.073530 19 23 0.000000 19 24 -0.484698 19 25 -0.818273 19 26  
0.487688 19 27 0.000000 20 1 -0.431090 20 2 0.391409  
20 3 0.224499 20 4 -0.193357 20 5 -0.518211 20 6 0.987249 20 7  
-0.122371 20 8 -0.071552 20 9 -0.000000 20 10 0.334426  
20 11 0.363257 20 12 -0.954889 20 13 -0.000000 20 14 0.097833 20 15  
-0.539208 20 16 0.400053 20 17 0.219507 20 18 -0.200405  
20 19 -0.511086 20 21 -0.133053 20 22 -0.074539 20 23 0.000000 20 24  
0.334132 20 25 0.354332 20 26 -0.960682 20 27 0.000000  
21 1 0.277731 21 2 -0.413844 21 3 -0.150115 21 4 0.618504 21 5  
0.025219 21 6 -0.138507 21 7 0.984945 21 8 0.304915  
21 9 0.000000 21 10 -0.449211 21 11 0.157007 21 12 0.064008 21 13  
-0.000000 21 14 -0.009172 21 15 0.254885 21 16 -0.420877  
21 17 -0.141081 21 18 0.614370 21 19 0.025750 21 20 -0.133053 21 22  
0.293562 21 23 0.000000 21 24 -0.448084 21 25 0.157678  
21 26 0.062068 21 27 0.000000 22 1 0.086286 22 2 -0.174587 22 3  
0.071080 22 4 0.667604 22 5 0.074555 22 6 -0.081357  
22 7 0.286031 22 8 0.997948 22 9 -0.000000 22 10 -0.085127 22 11  
-0.108668 22 12 0.073003 22 13 -0.000000 22 14 0.015194  
22 15 0.073936 22 16 -0.175274 22 17 0.065169 22 18 0.676753 22 19  
0.073530 22 20 -0.074539 22 21 0.293562 22 23 0.000000  
22 24 -0.089614 22 25 -0.105415 22 26 0.067928 22 27 0.000000 23 1  
0.000000 23 2 0.000000 23 3 0.000000 23 4 0.000000  
23 5 0.000000 23 6 0.000000 23 7 0.000000 23 8 0.000000 23 9  
0.000000 23 10 0.000000 23 11 0.000000 23 12 0.000000  
23 13 0.000000 23 14 0.000000 23 15 0.000000 23 16 0.000000 23 17  
0.000000 23 18 0.000000 23 19 0.000000 23 20 0.000000  
23 21 0.000000 23 22 0.000000 23 24 0.000000 23 25 0.000000 23 26  
0.000000 23 27 0.000000 24 1 -0.114976 24 2 0.515770  
24 3 0.479085 24 4 -0.563562 24 5 -0.480576 24 6 0.348370 24 7  
-0.451809 24 8 -0.094544 24 9 -0.000000 24 10 0.993028  
24 11 -0.019914 24 12 -0.229222 24 13 0.000000 24 14 -0.025079 24 15  
-0.100623 24 16 0.517345 24 17 0.481376 24 18 -0.566537  
24 19 -0.484698 24 20 0.334132 24 21 -0.448084 24 22 -0.089614 24 23  
0.000000 24 25 -0.020574 24 26 -0.222747 24 27 0.000000  
25 1 -0.018563 25 2 0.266125 25 3 0.236249 25 4 -0.001814 25 5  
-0.817260 25 6 0.362608 25 7 0.166355 25 8 -0.097734  
25 9 -0.000000 25 10 -0.022682 25 11 0.998140 25 12 -0.421607 25 13  
0.000000 25 14 0.004262 25 15 -0.029302 25 16 0.272056

25 17 0.233397 25 18 -0.009539 25 19 -0.818273 25 20 0.354332 25 21  
0.157678 25 22 -0.105415 25 23 0.000000 25 24 -0.020574  
25 26 -0.416947 25 27 0.000000 26 1 0.310345 26 2 -0.299251 26 3  
-0.174955 26 4 0.121751 26 5 0.490787 26 6 -0.948787  
26 7 0.051448 26 8 0.064375 26 9 0.000000 26 10 -0.219951 26 11  
-0.422893 26 12 0.994504 26 13 0.000000 26 14 -0.055468  
26 15 0.408017 26 16 -0.309194 26 17 -0.171698 26 18 0.129320 26 19  
0.487688 26 20 -0.960682 26 21 0.062068 26 22 0.067928  
26 23 0.000000 26 24 -0.222747 26 25 -0.416947 26 27 0.000000 27 1  
0.000000 27 2 0.000000 27 3 0.000000 27 4 0.000000  
27 5 0.000000 27 6 0.000000 27 7 0.000000 27 8 0.000000 27 9  
0.000000 27 10 0.000000 27 11 0.000000 27 12 0.000000  
27 13 0.000000 27 14 0.000000 27 15 0.000000 27 16 0.000000 27 17  
0.000000 27 18 0.000000 27 19 0.000000 27 20 0.000000  
27 21 0.000000 27 22 0.000000 27 23 0.000000 27 24 0.000000 27 25  
0.000000 27 26 0.000000  
nscl -predict delta A,B,C from OPC1-JMS 200, 287-89 (200Thu Sep 23  
17:59:23 2004
